# Supplementary material for: Mutational sources of trans-regulatory variation affecting gene expression in Saccharomyces cerevisiae
Source: eLife. 2021 Aug 31;10:e67806. doi: 10.7554/eLife.67806 (PMC8456550; doi:10.7554/eLife.67806)
Supplement: Supplementary file 12. [file elife-67806-supp12.bz2]

Archive with 67 entries (62 files):
- Input_Files
- Input_Files/ade_genotype_key.csv
- Input_Files/Amino.Acids
- Input_Files/Amino.Acids/DIFF.CAUSAL.BSA.SEQ.txt
- Input_Files/Amino.Acids/DIFF.CAUSAL.txt
- Input_Files/Amino.Acids/ENRICHMENT.CAUSAL.BSA.SEQ.txt
- Input_Files/Amino.Acids/ENRICHMENT.CAUSAL.txt
- Input_Files/Amino.Acids/FREQ.CAUSAL.BSA.SEQ.txt
- Input_Files/Amino.Acids/FREQ.CAUSAL.txt
- Input_Files/Amino.Acids/FREQ.SUBSTITUTION.txt
- Input_Files/Amino.Acids/LOG.P.VAL.CAUSAL.BSA.SEQ.txt
- Input_Files/Amino.Acids/LOG.P.VAL.CAUSAL.txt
- Input_Files/Amino.Acids/N.CAUSAL.BSA.SEQ.txt
- Input_Files/Amino.Acids/N.CAUSAL.txt
- Input_Files/Amino.Acids/N.SUBSTITUTION.txt
- Input_Files/Amino.Acids/P.VAL.CAUSAL.BSA.SEQ.txt
- Input_Files/Amino.Acids/P.VAL.CAUSAL.txt
- Input_Files/BSA_Samples.txt
- Input_Files/Chromosome_Length.txt
- Input_Files/ConfirmedSNP.vcf
- Input_Files/Expression_WT.txt
- Input_Files/Figure1B_SourceData2.txt
- Input_Files/Figure1C-D_SourceData3.txt
- Input_Files/Figure1D_SourceData4.txt
- Input_Files/Figure1E_SourceData5.txt
- Input_Files/Fitness
- Input_Files/Fitness/All.Expression.txt
- Input_Files/Fitness/Dilutions.txt
- Input_Files/Fitness/Glucose.Fitness.txt
- Input_Files/Fitness/Summary.Expression.txt
- Input_Files/Fitness/Time.Points.txt
- Input_Files/Flow.Template
- Input_Files/Flow.Template/README.txt
- Input_Files/Flow.Template/TEMPLATE.GCR1.FITNESS.txt
- Input_Files/Flow.Template/TEMPLATE.GCR1.MUTANTS.txt
- Input_Files/Flow.Template/TEMPLATE.RAP1.MUTANTS.txt
- Input_Files/Flow.Template/TEMPLATE.SECOND.SCREEN.txt
- Input_Files/Flow.Template/TEMPLATE.SINGLE.SITE.MUTANTS.txt
- Input_Files/Gene.List.txt
- Input_Files/Genetic.Code.txt
- Input_Files/Introns.txt
- Input_Files/Linked.Mutations.txt
- Input_Files/Network
- Input_Files/Network/AllBindingInteractions.txt
- Input_Files/Network/AllNegativeInteractions.txt
- Input_Files/Network/AllPositiveInteractions.txt
- Input_Files/Network/GeneListAnalysis.txt
- Input_Files/Network/Interactome.txt
- Input_Files/Network/TDH3.Network.Genes.txt
- Input_Files/Network/TDH3.Network.txt
- Input_Files/Network/TF_Names.txt
- Input_Files/QTL.Positions.txt
- Input_Files/README.txt
- Input_Files/Reference.Genome.zip
- Input_Files/S288c.genome.truncated.bed
- Input_Files/SourceData1.txt
- Input_Files/SourceData10.txt
- Input_Files/SourceData11.txt
- Input_Files/SourceData12.txt
- Input_Files/SourceData13.txt
- Input_Files/SourceData14.txt
- Input_Files/SourceData15.txt
- Input_Files/SourceData16.txt
- Input_Files/SourceData6.txt
- Input_Files/SourceData7.txt
- Input_Files/SourceData8.txt
- Input_Files/SourceData9.txt
