# Supplementary material for: Mutational sources of trans-regulatory variation affecting gene expression in Saccharomyces cerevisiae
Source: eLife. 2021 Aug 31;10:e67806. doi: 10.7554/eLife.67806 (PMC8456550; doi:10.7554/eLife.67806)
Supplement: Supplementary file 12. [file elife-67806-supp12.bz2 › Input_Files/Amino.Acids/LOG.P.VAL.CAUSAL.BSA.SEQ.txt]

Ala	Arg	Asn	Asp	Cys	Gln	Glu	Gly	His	Ile	Leu	Lys	Met	Phe	Pro	Ser	Thr	Trp	Tyr	Val	Stop	REF
Ala	0.05	0	0	0	0	0	0	0	0	0	0	0	0	0	0	0	0.85	0	0	0.18	0	1.41
Arg	0	0.75	0	0	0	0	0	0	0	0	0	0.06	0	0	0	0	0	0	0	0	3.1	0.07
Asn	0	0	0.1	0	0	0	0	0	0	0	0	0	0	0	0	0	0	0	0	0	0	0.1
Asp	0	0	0.14	0	0	0	0	0	0	0	0	0	0	0	0	0	0	0	0	0	0	0.27
Cys	0	0	0	0	0	0	0	0	0	0	0	0	0	0	0	0	0	0	0.21	0	0	0
Gln	0	0	0	0	0	0.78	0	0	0	0	0	0	0	0	0	0	0	0	0	0	1.4	0.21
Glu	0	0	0	0	0	0	0.23	0	0	0	0	0.04	0	0	0	0	0	0	0	0	0	0.16
Gly	0	1.38	0	1.68	0	0	2.92	0	0	0	0	0	0	0	0	0.2	0	0	0	0	0	3.7
His	0	0	0	0	0	0	0	0	0	0	0	0	0	0	0	0	0	0	0	0	0	0
Ile	0	0	0	0	0	0	0	0	0	0	0	0	0	0	0	0	0	0	0	0	0	0
Leu	0	0	0	0	0	0	0	0	0	0	0.55	0	0	0	0	0	0	0	0	0	0	0.59
Lys	0	0	0	0	0	0	0	0	0	0	0	0.64	0	0	0	0	0	0	0	0	0	0.96
Met	0	0	0	0	0	0	0	0	0	0.54	0	0	0	0	0	0	0	0	0	0	0	0
Phe	0	0	0	0	0	0	0	0	0	0	0	0	0	0	0	0	0	0	0	0	0	0
Pro	0	0	0	0	0	0	0	0	0	0	0.38	0	0	0	0.18	0.39	0	0	0	0	0	0.24
Ser	0	0	0.24	0	0	0	0	0	0	0	0	0	0	0.17	0	0.19	0	0	0	0	0	1.07
Thr	0	0	0	0	0	0	0	0	0	0.24	0	0	0	0	0	0	0.19	0	0	0	0	1.01
Trp	0	0	0	0	0	0	0	0	0	0	0	0	0	0	0	0	0	0	0	0	4	4
Tyr	0	0	0	0	0	0	0	0	0	0	0	0	0	0	0	0	0	0	0	0	0	0
Val	0	0	0	0	0	0	0	0	0	0.2	0	0	0.21	0	0	0	0	0	0	0	0	0.54
Stop	0	0	0	0	0	0	0	0	0	0	0	0	0	0	0	0	0	0	0	0	0	0
ALT	0.1	0.5	0.57	1.44	0	0.9	1.68	0	0	0.35	0.24	0.33	0.01	0.19	0.18	0.43	1.31	0	0.2	0.33	4	0
