# Supplementary material for: Mutational sources of trans-regulatory variation affecting gene expression in Saccharomyces cerevisiae
Source: eLife. 2021 Aug 31;10:e67806. doi: 10.7554/eLife.67806 (PMC8456550; doi:10.7554/eLife.67806)
Supplement: Supplementary file 12. [file elife-67806-supp12.bz2 › Input_Files/Amino.Acids/P.VAL.CAUSAL.BSA.SEQ.txt]

Ala	Arg	Asn	Asp	Cys	Gln	Glu	Gly	His	Ile	Leu	Lys	Met	Phe	Pro	Ser	Thr	Trp	Tyr	Val	Stop	REF
Ala	0.8887	1	1	1	1	1	1	1	1	1	1	1	1	1	1	1	0.1404	1	1	0.6615	1	0.0384
Arg	1	0.1779	1	1	1	1	1	1	1	1	1	0.8677	1	1	1	1	1	1	1	1	7e-04	0.8555
Asn	1	1	0.8012	1	1	1	1	1	1	1	1	1	1	1	1	1	1	1	1	1	1	0.8012
Asp	1	1	0.7252	1	1	1	1	1	1	1	1	1	1	1	1	1	1	1	1	1	1	0.5364
Cys	1	1	1	1	1	1	1	1	1	1	1	1	1	1	1	1	1	1	0.6122	1	1	1
Gln	1	1	1	1	1	0.1653	1	1	1	1	1	1	1	1	1	1	1	1	1	1	0.0393	0.6217
Glu	1	1	1	1	1	1	0.5883	1	1	1	1	0.909	1	1	1	1	1	1	1	1	1	0.6966
Gly	1	0.0415	1	0.0207	1	1	0.0011	1	1	1	1	1	1	1	1	0.6284	1	1	1	1	1	1e-04
His	1	1	1	1	1	1	1	1	0.9972	1	1	1	1	1	1	1	1	1	0.9974	1	1	0.996
Ile	1	1	1	1	1	1	1	1	1	0.9972	1	1	1	1	1	1	1	1	1	1	1	1
Leu	1	1	1	1	1	1	1	1	1	1	0.2832	1	1	1	1	1	1	1	1	1	1	0.2595
Lys	1	1	1	1	1	1	1	1	1	1	1	0.2285	1	1	1	1	1	1	1	1	1	0.1098
Met	1	1	1	1	1	1	1	1	1	0.2857	1	1	1	1	1	1	1	1	1	1	1	1
Phe	1	1	1	1	1	1	1	1	1	1	1	1	1	1	1	1	1	1	1	1	1	1
Pro	1	1	1	1	1	1	1	1	1	1	0.4193	1	1	1	0.6623	0.4114	1	1	1	1	1	0.5764
Ser	1	1	0.5805	1	1	1	1	1	1	1	1	1	1	0.6706	1	0.643	1	1	1	1	1	0.085
Thr	1	1	1	1	1	1	1	1	1	0.5737	1	1	1	1	1	1	0.6424	1	1	1	1	0.0977
Trp	1	1	1	1	1	1	1	1	1	1	1	1	1	1	1	1	1	1	1	1	0	0
Tyr	1	1	1	1	1	1	1	1	1	1	1	1	1	1	1	1	1	1	1	1	1	1
Val	1	1	1	1	1	1	1	1	1	0.6345	1	1	0.6177	1	1	1	1	1	1	0.9946	1	0.2861
Stop	1	1	1	1	1	1	1	1	1	1	1	1	1	1	1	1	1	1	1	1	1	1
ALT	0.8015	0.3161	0.2695	0.0361	1	0.1272	0.0206	0.9958	1	0.4495	0.5724	0.4691	0.9787	0.6437	0.6623	0.3713	0.0492	1	0.6311	0.4695	0	1
