# Supplementary material for: Mutational sources of trans-regulatory variation affecting gene expression in Saccharomyces cerevisiae
Source: eLife. 2021 Aug 31;10:e67806. doi: 10.7554/eLife.67806 (PMC8456550; doi:10.7554/eLife.67806)
Supplement: Supplementary file 12. [file elife-67806-supp12.bz2 › Input_Files/Expression_WT.txt]

STRAIN	MASTER	TYPE	CLASS	STATUS	DAY	REP	DAYxREP	PLATE	ROW	COL	POSITION	BLOCK	STACK	DEPTH	ORDER	FLOW.RUN	BLOCKxROW	COUNTS.INITIAL	COUNTS.GATES	COUNTS.SINGLES	COUNTS.FINAL	FSC.KURTOSIS	WIDTH	FSC.MEDIAN.INITIAL	FSC.MAD.INITIAL	FL1.MEDIAN.INITIAL	FL1.MAD.INITIAL	YFP.MEDIAN.INITIAL	YFP.MAD.INITIAL	YFP.SD.INITIAL	INTERCEPT.INITIAL	SLOPE.INITIAL	THETA	YFP.MEDIAN.ROT	YFP.MAD.ROT	YFP.SD.ROT	FSC.MEDIAN.FINAL	FSC.MAD.FINAL	YFP.MEDIAN.FINAL	YFP.MAD.FINAL	YFP.SD.FINAL	log.YFP.MEDIAN	log.YFP.MAD	log.YFP.SD	log.RNA.MEDIAN	log.RNA.SD	FSC.MEDIAN.CORRECT	log.RNA.MEDIAN.CORRECT	YFP.MEDIAN.CORRECT
2	1	A	EMS	EMS	1	1	1	1	A	2	A02	1	1	1	1	1	1	13647	9634	4330	3795	-0.154939871355914	57	5.68712122864852	0.11475619191492	5.3391631410595	0.153113696965695	0.937432322232338	0.0159473594746237	0.0160525557240486	0.796366457798249	0.0248044412564091	0.0247993560707969	0.937086639952375	0.0158667408217839	0.0158059737713384	5.68705522842622	0.114262218565018	0.995697325691002	0.0609110714467687	0.0616356476648767	-0.00431195744989334	0.0617683533528113	0.0614415557527235	0.248769147266675	0.124286679797356	5.68705522842622	0.268381862782223	1.00551957411397
3	1	A	EMS	EMS	1	1	1	1	A	3	A03	1	1	1	1	1	1	12992	9050	4054	3578	-0.0940636543589299	57	5.67509475068651	0.106549279584432	5.31785448834678	0.157762795174691	0.936831166974998	0.0174887648794505	0.0178413592137345	0.724899229554475	0.0373442112829721	0.037326865838542	0.937102711279858	0.0171220697628175	0.0174004663536924	5.67512534723972	0.106624939763208	0.99575965515309	0.0658388977252602	0.0675343081195792	-0.0042493606064054	0.0665359062799497	0.0674157134242508	0.248894825107413	0.136164061244413	5.67512534723972	0.268507540622962	1.00558313809261
4	1	A	SHAM	SHAM	1	1	1	1	A	4	A04	1	1	1	1	1	1	14111	10229	4564	3996	-0.192853507346568	57	5.67231633618833	0.109846843220025	5.32044021504492	0.148780966535477	0.937057977643108	0.0159171473241749	0.0164968061675821	0.765156201214316	0.0303053931128789	0.03029612056074	0.93668869716504	0.0157854493589165	0.0161681953951856	5.67245203544489	0.110220636771011	0.994156479360305	0.061238790967278	0.0625669613728048	-0.00586066090953567	0.0615487884697697	0.062589679053237	0.245657233748483	0.126557874659779	5.67245203544489	0.265269949264031	1.00394820930569
5	1	A	EMS	EMS	1	1	1	1	A	5	A05	1	1	1	1	1	1	18269	13145	5495	4714	-0.162354818553723	56	5.67254162748431	0.0999438397377382	5.31140734651181	0.150342600636609	0.935077996148934	0.0162834852696056	0.0167410008323956	0.72396754172142	0.0372162018881718	0.037199034106226	0.934903664652092	0.0158480709148463	0.0163087436229537	5.6724744642995	0.10044896630026	0.987303469933844	0.0604503087651183	0.0628994265712969	-0.0127778199412031	0.0612607342518305	0.0630149050304274	0.231698273764811	0.129018828707397	5.6724744642995	0.251310989280359	0.99695946706122
7	1	A	EMS	EMS	1	1	1	1	A	7	A07	1	1	1	1	1	1	18723	13389	5550	4642	-0.191717092954254	56	5.69977400657895	0.098826667836493	5.36522208238922	0.139507478196185	0.940234274362857	0.0157026447428589	0.0161285988474654	0.800312676169088	0.0245486221089231	0.0245436926061736	0.939918807995902	0.0155766319629934	0.0159164829100781	5.69974825849379	0.0988838231367188	1.00680316774331	0.061679697370826	0.0630713928645596	0.00678013060043304	0.0613610470261337	0.0623502515651969	0.270916710825803	0.124396018395425	5.69974825849379	0.290529426341351	1.01684538189875
9	1	A	EMS	EMS	1	1	1	1	A	9	A09	1	1	1	1	1	1	19421	14160	6412	5372	-0.0394187719944497	56	5.65811971703704	0.0962839026634182	5.30732164062603	0.140826554787936	0.937138108257754	0.0153690409129055	0.0157177062582171	0.723667171051646	0.0377282468172828	0.0377103610355268	0.936924361122147	0.0153823693350588	0.0152987572895019	5.65816567689493	0.096471300036706	0.995068398818847	0.0594913443212637	0.0595309629767548	-0.00494380201422677	0.0596421843797032	0.0594232573783263	0.247500127728441	0.120195071039031	5.65816567689493	0.26711284324399	1.00487819052224
10	1	A	EMS	EMS	1	1	1	1	A	10	A10	1	1	1	1	1	1	20333	15064	6164	5350	-0.113937141947361	56	5.68345500814796	0.0910347939768008	5.32479466178013	0.1403411305141	0.935879915203279	0.0154744392108515	0.0156942620147785	0.726545871667124	0.0368321809948432	0.0368155389092512	0.935708800126745	0.0154127373344253	0.0152930994928665	5.68365498273453	0.091271475710854	0.990382666199363	0.0592900200241658	0.0588157784494116	-0.00966387905438285	0.0598077396229329	0.0590587745535647	0.237994435398066	0.119885282189058	5.68365498273453	0.257607150913614	1.00009965083753
12	1	A	EMS	EMS	1	1	1	1	A	12	A12	1	1	1	1	1	1	20571	15207	6519	5684	-0.139740652077762	56	5.6742809287295	0.10123951496852	5.34758173502853	0.150152485113235	0.941065087292995	0.0168830588793222	0.0171106853192102	0.760391129200042	0.0318408553193377	0.0318301013486317	0.940948860050944	0.0166365362299701	0.0167919098430017	5.67413176303574	0.101538235154652	1.01090371994227	0.066249666029259	0.0682385526515548	0.0108447030028158	0.0656370037050092	0.0665796760733683	0.278971721220736	0.133507486024199	5.67413176303574	0.298584436736285	1.02102715089908
13	1	A	EMS	EMS	1	1	1	1	B	1	B01	1	1	1	1	1	2	19400	14259	5527	4880	-0.0750924304476426	56	5.68845319370831	0.0962690046670459	5.3315447105524	0.141221063292284	0.935987418063733	0.0159205620449381	0.0161854889070966	0.758501639634333	0.0312010615866028	0.0311909426870109	0.935883152574977	0.0156678028268923	0.0158953299000893	5.68853028448058	0.0962279476938699	0.991052025361207	0.060425528298124	0.0612068819555802	-0.0089882483318783	0.0609062934508718	0.0614045328740061	0.239357872576766	0.124589127108021	5.69099825985065	0.25642150681151	0.999506803894124
14	1	A	EMS	EMS	1	1	1	1	B	2	B02	1	1	1	1	1	2	19667	15298	6540	5900	0.120183332313966	56	5.67368060720479	0.0931045067541089	5.31777301189866	0.131834148330631	0.937143951147289	0.0143074084901957	0.0142941785471764	0.807296809248464	0.0228858744240797	0.0228818800859461	0.936902268628994	0.0143309757766376	0.0141278697448598	5.6735867303411	0.0931621566859178	0.994982838356229	0.0554270302809236	0.0551069724720239	-0.00502978994656178	0.0559270200814964	0.0549851538965832	0.247327363275391	0.11128210529294	5.67605470571117	0.264390997510136	1.00350526637595
15	1	A	EMS	EMS	1	1	1	1	B	3	B03	1	1	1	1	1	2	18023	14113	6196	5644	0.203214020857541	56	5.66867240002002	0.0922647225154025	5.3250988192203	0.131747575301317	0.938697561470154	0.0141159891295966	0.0142238682187176	0.768356808213814	0.0300494968197031	0.0300404570960929	0.938494643408273	0.0140557330602362	0.0139540932665397	5.66879859658112	0.0921882725067784	1.001187816313	0.0551810036270153	0.0551583479293584	0.00118711138201812	0.0549955009027398	0.0546739972185063	0.259779739092315	0.110007433651746	5.67126657195119	0.276843373327059	1.00981703231143
17	1	A	EMS	EMS	1	1	1	1	B	5	B05	1	1	1	1	1	2	17626	13707	5425	4998	0.154939018349699	56	5.66893496094651	0.0907950659368071	5.30273450934026	0.13413424518137	0.934687303326563	0.0147418794999498	0.0149271423025285	0.770866354653034	0.0288980116727565	0.028889971505183	0.934646854702978	0.0145948932631305	0.0146916446008375	5.66888418243501	0.0907265447454355	0.986325385217756	0.0553248803544404	0.0562154749543403	-0.0137689735384484	0.0560174861934558	0.0566064819994178	0.229690018587393	0.115540559724675	5.67135215780508	0.246753652822137	0.994698818039132
19	1	A	EMS	EMS	1	1	1	1	B	7	B07	1	1	1	1	1	2	19780	15574	6848	6324	0.14644904136147	56	5.67902657889347	0.0989256284426965	5.31293332352637	0.133412423225823	0.934558742631624	0.0138772733177517	0.0140961988761771	0.808220901050703	0.0222463902617511	0.0222427214243347	0.934308671289261	0.0139473109870629	0.0139191927203409	5.67903107783129	0.0989359382292201	0.985040375165232	0.0529861010076047	0.0532249161516121	-0.0150726486346629	0.0537534473972182	0.0536423838028106	0.227045423127694	0.109683702457383	5.68149905320136	0.244109057362439	0.993391692899805
20	1	A	EMS	EMS	1	1	1	1	B	8	B08	1	1	1	1	1	2	19076	14958	5734	5201	0.177434985302269	56	5.65570495396516	0.081098952645126	5.31281393956209	0.11645795599076	0.938902911871456	0.0134774511398351	0.0135855137506247	0.748687878844815	0.033632417987661	0.033619745601159	0.938488926965881	0.0132165044583228	0.0133314276089925	5.65576351982864	0.0812934297048614	1.00116540260829	0.0517046256423292	0.0525300176599623	0.00116472405381468	0.0516333866038654	0.0521659146068277	0.259735036353057	0.104770193063242	5.65823149519871	0.276798670587801	1.00979423286575
22	1	A	SHAM	SHAM	1	1	1	1	B	10	B10	1	1	1	1	1	2	20358	15309	6597	5725	-0.0874568270658016	56	5.68365390548816	0.0985051679736547	5.33078905265207	0.139767584926321	0.936880973580713	0.0150284800420894	0.0151082433567188	0.772634676676	0.0288980116727579	0.0288899715051868	0.936440261857708	0.0146482378242942	0.0148292713051727	5.68382508239764	0.0986068969405236	0.993196958467892	0.0563305747499393	0.0576024017467394	-0.0068262877089443	0.0568826287831514	0.0575581226693503	0.243714468427242	0.116742350573988	5.68629305776771	0.260778102661986	1.00168865140607
23	1	A	EMS	EMS	1	1	1	1	B	11	B11	1	1	1	1	1	2	20499	16412	6346	5902	0.291493183376482	56	5.67428046915817	0.0806817663517811	5.31566917201918	0.120465897149694	0.935709698731883	0.014390551952396	0.0142428866572815	0.765200425819815	0.0300494968197023	0.0300404570960929	0.935744493089338	0.0141757289308865	0.0140406050229629	5.67455045203808	0.0807430156682777	0.990519621508873	0.0541500216722698	0.0543648877778067	-0.00952560348820478	0.0547079287759854	0.0544430910228411	0.238273554965052	0.110782024183764	5.67701842740815	0.255337189199796	0.998965237345058
24	1	A	EMS	PETITE	1	1	1	1	B	12	B12	1	1	1	1	1	2	2410	1901	926	814	-0.435720550855648	50	5.44614553269312	0.134852180744465	5.19208494537573	0.13622877548588	0.953587422002211	0.0145020462855927	0.0143580135458073	1.00092954922676	-0.00869277674280907	-0.00869255779801035	0.953786242710629	0.0141172424091572	0.0143138832819113	5.44628857192015	0.135027917458569	1.06487826913204	0.0626795366328405	0.0624594976447162	0.0628604911254817	0.0586606223011292	0.0588312695723187	0.379360096878381	0.110528984685555	5.44875654729022	0.396423731113125	1.07460360098564
25	1	A	EMS	EMS	1	1	1	1	C	1	C01	1	1	1	1	1	3	20665	15887	6785	6353	0.195456043211011	56	5.68830589375392	0.0791816979615027	5.3623655915853	0.130691181453371	0.942303723522575	0.0163947444528575	0.0161132888604456	0.667228416061807	0.0483580371025433	0.0483203948184002	0.942455424531983	0.0161520337826046	0.0156889177674657	5.68819638005607	0.0792124294214371	1.01696102779741	0.0652977544299796	0.0632261679218027	0.0168187955823263	0.0640974505971765	0.0620172928958147	0.290753060446801	0.122252036133267	5.68964165640566	0.306713420592082	1.02528161169476
27	1	A	EMS	EMS	1	1	1	1	C	3	C03	1	1	1	1	1	3	16330	12430	5196	4545	0.234202961487687	56	5.68414220474453	0.0879904498929367	5.33729150136951	0.125211318306605	0.938828859565172	0.0129565913910148	0.0134373483527017	0.73601762577636	0.0356801829517083	0.035665053318336	0.938821942536928	0.0127417457642506	0.0130661697229216	5.68434681083731	0.0880366056794444	1.00247279783162	0.0499620954884081	0.0517668747536576	0.00246974549789848	0.0497750099722481	0.0512669643163272	0.262339219220729	0.102979590824828	5.6857920871869	0.27829957936601	1.01056028918841
28	1	A	EMS	EMS	1	1	1	1	C	4	C04	1	1	1	1	1	3	17328	12603	5630	4516	-0.294300326958213	56	5.67600779713983	0.111341862728425	5.31172843786492	0.14774714595073	0.934537927022049	0.0144874941645777	0.0148684072974765	0.774869570725232	0.0281303976321657	0.0281229811112381	0.934118250129189	0.0141707551696468	0.0145187720896451	5.67613000507161	0.111496698547014	0.984318317849509	0.0532729170627965	0.0551526721779281	-0.0158059405284393	0.054312214663569	0.0557255514100334	0.225556329171106	0.113825713268271	5.6775752814212	0.241516689316387	0.992113732543276
29	1	A	EMS	EMS	1	1	1	1	C	5	C05	1	1	1	1	1	3	15582	12225	5377	4845	0.302455365904201	55	5.65066491601352	0.0777318160890249	5.2610248339924	0.109547988310566	0.930727444598476	0.0112632317289564	0.0115933692160199	0.697280792778078	0.0413131295679609	0.0412896495405858	0.930642860611073	0.0108798734188487	0.0111963256980439	5.65059598453937	0.0776788120744704	0.971327142677198	0.0403475431442416	0.0416314447147231	-0.029091954274503	0.0414944356261762	0.0425846001450657	0.198378771492494	0.0882873267241293	5.65204126088896	0.214339131637776	0.978913550057242
30	1	A	SHAM	SHAM	1	1	1	1	C	6	C06	1	1	1	1	1	3	18424	14443	6051	5529	0.218384370170551	56	5.68486779363129	0.0856442101823223	5.33034273806873	0.126713631528473	0.937047297081196	0.0139270141036634	0.013747328723396	0.772038605164908	0.0290259506300473	0.0290178032375079	0.936905499307991	0.0136778032820808	0.0135129051999755	5.68483222214479	0.0859771984482621	0.994995349042357	0.0530124784447631	0.0525464131161682	-0.00501721616375835	0.0534314714874578	0.0525256811491957	0.247352626828122	0.106108673525646	5.68627749849438	0.263312986973403	1.00296254015962
32	1	A	EMS	EMS	1	1	1	1	C	8	C08	1	1	1	1	1	3	19766	15242	6397	5859	0.312625631764606	56	5.67512182280908	0.0800690082306578	5.24148173003286	0.118366368335678	0.923305549193462	0.0132167200398784	0.0135625747516818	0.674312962029629	0.0438744039225903	0.043846284187059	0.923085405904463	0.0128622587044389	0.0131233629178761	5.67511266499318	0.0799336497466433	0.944266659179558	0.044747260901502	0.0458842535548598	-0.0573466747815726	0.0474552236318149	0.0482982914119689	0.13927945067597	0.103230270312639	5.67655794134277	0.155239810821252	0.951417706487179
33	1	A	EMS	EMS	1	1	1	1	C	9	C09	1	1	1	1	1	3	18973	13213	6007	4792	-0.397411112713614	56	5.68347299648723	0.107118794614688	5.32123688525857	0.142082106039753	0.935792446728552	0.0141477232673871	0.0149636917362644	0.807175006418664	0.0226300785434156	0.0226262166213084	0.935541454303212	0.0140405583287503	0.014744819291128	5.68346468978546	0.107129563289361	0.989741064382683	0.0536894704825758	0.0562466147754307	-0.0103119212769974	0.0541566141049983	0.0567055877374003	0.236685790721075	0.11479864102782	5.68490996613505	0.252646150866356	0.997623722429793
34	1	A	EMS	EMS	1	1	1	1	C	10	C10	1	1	1	1	1	3	19573	14379	7218	5614	-0.261358592057899	56	5.67147785281373	0.0994390977471801	5.32691111505141	0.13828941049881	0.9385107951529	0.0131576740481327	0.0141052258848976	0.678781298511077	0.0457957349710829	0.0457637601719201	0.937665242067592	0.012458184162092	0.0132539447244936	5.67140377039816	0.0993391927865439	0.997946262582071	0.0486476814848595	0.0514245104392126	-0.00205584935047608	0.0486850031013817	0.0514469267881704	0.253293818211936	0.103228056011791	5.67284904674775	0.269254178357217	1.00596092919742
35	1	A	EMS	EMS	1	1	1	1	C	11	C11	1	1	1	1	1	3	19260	14674	6434	5805	0.137213461024429	56	5.68487586886294	0.0904131768138259	5.33605326821478	0.132949010211777	0.937646657962544	0.0148802762920283	0.0151558341988755	0.774092360463417	0.0287700736607008	0.0287621397728588	0.937263026970766	0.0149412164359128	0.0149159342310839	5.68468860181598	0.0904081231109342	0.996381836781901	0.0580812331595245	0.0584386291157738	-0.00362472460218927	0.0583435437917946	0.0581530757984213	0.250148494334238	0.117677544902883	5.68613387816557	0.266108854479519	1.00437133427824
37	1	A	EMS	EMS	1	1	1	1	D	1	D01	1	1	1	1	1	4	17231	12379	5136	4431	-0.0467412209916169	57	5.69683498483964	0.0941164455059371	5.36044572075821	0.130900990778129	0.940068567860864	0.0144971272371235	0.0144614495437859	0.786373438080625	0.0269790383939945	0.0269724955203193	0.939884094346935	0.0143630328359225	0.0142346002317249	5.6968011092611	0.0943957583797826	1.00666555002969	0.0569886124565205	0.0565068210302966	0.00664343347602681	0.0566682513811004	0.0558815119561869	0.270645249890101	0.111478939145534	5.70092593702102	0.283728212009744	1.01334065590486
38	1	A	SHAM	SHAM	1	1	1	1	D	2	D02	1	1	1	1	1	4	18591	14049	5965	5359	0.165898417130304	56	5.6777784469289	0.089517539162881	5.33130579855327	0.127793497255163	0.938029004540668	0.013522231821239	0.0137334577718746	0.765235227038554	0.0304333427443929	0.0304239522930571	0.937874930058992	0.0133753998007683	0.013454344951944	5.67775461053946	0.0895768676149566	0.998763802377522	0.0519731516329513	0.0526966685348399	-0.00123696234505554	0.0521884735337649	0.0524836020711688	0.254933578509213	0.105608434334922	5.68187943829938	0.268016540628856	1.00533485078174
39	1	A	EMS	EMS	1	1	1	1	D	3	D03	1	1	1	1	1	4	19493	15880	6575	6138	0.476897232257712	55	5.6594293654318	0.0738742321353536	5.32555568372635	0.122366371992505	0.940977503089064	0.0145467176692597	0.0146866981259896	0.609982098458752	0.0584856499229509	0.0584191016719784	0.940783939114272	0.0138781722764894	0.014103578733976	5.65954659321143	0.0738937677626473	1.01024496103967	0.055048205495624	0.0566613484807198	0.0101928368251166	0.0546691675557676	0.055692787640502	0.277682040138832	0.110999959094602	5.66367142097135	0.290765002258475	1.01696720388676
40	1	A	EMS	EMS	1	1	1	1	D	4	D04	1	1	1	1	1	4	22384	17610	8393	6944	0.0716502379742328	54	5.6302172877749	0.0954140538460159	5.31611928031915	0.125732513883521	0.943697237493577	0.012044044744709	0.0125260180324397	0.839325822067114	0.0185377242283507	0.0185356011869496	0.943549452910452	0.0118384361110636	0.0123884854708235	5.63027599156647	0.0954278208559707	1.02140463239579	0.0483008463249899	0.0507456612132871	0.0211787703642457	0.0472898282003352	0.0494271230398424	0.299308366740089	0.0972842721713929	5.63440081932639	0.312391328859732	1.02827383604562
42	1	A	EMS	EMS	1	1	1	1	D	6	D06	1	1	1	1	1	4	18001	12829	5728	4728	-0.344487871267768	56	5.68722074191089	0.103847404334366	5.32863031392335	0.137420225291761	0.936112411408364	0.013446296796281	0.0139036023101437	0.785586770546633	0.0264673463001815	0.0264611685910233	0.935575000924292	0.0131301269742731	0.0135970920895557	5.68692965835517	0.103896294592928	0.989869614406327	0.0505374937157843	0.0524589744656631	-0.0101820472064868	0.0510629460046141	0.0526279589440554	0.236948125307396	0.107040030289635	5.69105448611509	0.250031087427039	0.996323535973903
43	1	A	EMS	EMS	1	1	1	1	D	7	D07	1	1	1	1	1	4	19075	14617	6213	5568	0.101904661023485	56	5.67855297343746	0.0920212524207474	5.32738141354101	0.131883914446865	0.937421288120897	0.0142032501810866	0.0142847180461051	0.738443513688422	0.0350402251001677	0.0350258946567144	0.937186977576703	0.0138613387739436	0.013918949136631	5.67852837328506	0.0920610050754547	0.996086593549332	0.0536764382698436	0.0544106766366015	-0.00392108387269149	0.0539775233704107	0.0542331451648802	0.249553787863544	0.109631658501065	5.68265320104498	0.262636749983186	1.00262238600865
44	1	A	EMS	EMS	1	1	1	1	D	8	D08	1	1	1	1	1	4	21753	17048	7655	6970	0.230946765696102	56	5.67679599792449	0.0939341487448797	5.30725100531614	0.135780420049937	0.93449807876262	0.0140287332944582	0.0140524508572836	0.723955969131781	0.0370881937113498	0.0370712023739024	0.934082317272192	0.0135913350659515	0.0136159809140539	5.67691951752133	0.0941595289657227	0.984182184704023	0.0515653066013814	0.0517794804814248	-0.0159442520409584	0.0523428765207845	0.0523270087697336	0.22527533409059	0.106894053132181	5.68104434528125	0.238358296210233	0.990561208973294
47	1	A	EMS	EMS	1	1	1	1	D	11	D11	1	1	1	1	1	4	21037	17063	11909	11482	-0.366780196747682	50	5.44539167375385	0.16246459283649	5.03137008300105	0.189516365872902	0.922859337780539	0.0113941037643147	0.0112909699874825	0.772464843629969	0.027618673395975	0.027611654181936	0.92271777838647	0.0104100418455329	0.0105751360081689	5.44548451391809	0.16256563122143	0.942990668742546	0.0359806226847873	0.0369886790976652	-0.0586988917158987	0.0382745109245188	0.0389755805301852	0.136404602401433	0.0834566113610964	5.44960934167801	0.149487564521076	0.948827245294641
48	1	A	EMS	EMS	1	1	1	1	D	12	D12	1	1	1	1	1	4	19904	14985	6057	5428	0.0265075766644807	55	5.66603521459591	0.093951397200603	5.30745966664339	0.139251187504501	0.936336886753998	0.0148156358370718	0.0150149415013272	0.676130817343843	0.045923835549037	0.0458915919042419	0.936257595754163	0.0141367519178225	0.0144109828130609	5.66602976420673	0.0941698046487557	0.992492643555154	0.0544486750002032	0.0562406312413026	-0.00753567850706652	0.0547307538391516	0.0560843343470621	0.242286018989149	0.114145395148757	5.67015459196665	0.255368981108792	0.998981107579852
49	1	A	EMS	EMS	1	1	1	1	E	1	E01	2	1	1	1	2	1	19606	15147	6460	5488	0.0460448990879105	56	5.68109282456354	0.0885813859534793	5.33633663294337	0.131900126499687	0.938340973484994	0.0139522037799825	0.0144021956032929	0.737819957822556	0.0352962047716309	0.0352815581213675	0.938012386288958	0.0137679719594152	0.0140220158425529	5.68112450987725	0.0887861125735572	0.999300450397143	0.0537539079267918	0.0551947060376459	-0.000699794510451413	0.0539458050565306	0.0548102774184877	0.256008487117069	0.110495869011534	5.68957122611434	0.274404898337686	1.00857484020844
50	1	A	EMS	EMS	1	1	1	1	E	2	E02	2	1	1	1	2	1	18316	14327	6034	5409	0.203837624061532	56	5.6713950261179	0.0868939732431941	5.29994943071775	0.124158749011815	0.934072580642124	0.0133796778704239	0.0136371316396929	0.748410331174047	0.03273661041297	0.0327249234748891	0.933758502836685	0.0133020186154949	0.0133415078377412	5.67114998133758	0.087120279549317	0.982957124147005	0.0499111896257385	0.0506660365245904	-0.0171897771341444	0.0509632243931783	0.0512460747453628	0.222743104007765	0.104860644181109	5.67959669757467	0.241139515228382	0.9919280728519
53	1	A	EMS	EMS	1	1	1	1	E	5	E05	2	1	1	1	2	1	18981	14851	6493	5909	0.133367185294834	56	5.67785049078221	0.0895577926891738	5.32623137185726	0.128545412843083	0.93717759089582	0.0142800761048272	0.0141092138322618	0.732410616249927	0.0360641716400115	0.0360485485153112	0.936943490087002	0.0137997036125365	0.0137363719624808	5.67794840835423	0.0896323797929898	0.995142492799059	0.0537236106878353	0.0536114930724823	-0.00486934323367653	0.0539026766675062	0.0534854384282916	0.247649714845718	0.108227266169516	5.68639512459132	0.266046126066336	1.00433968319362
54	1	A	EMS	EMS	1	1	1	1	E	6	E06	2	1	1	1	2	1	18630	13047	5952	4688	-0.474795069597294	56	5.68758781436979	0.116258454262274	5.35680191905288	0.156709136587567	0.939975575106063	0.0161243006190334	0.0162196095429026	0.729033216496403	0.0370881937113498	0.0370712023739024	0.93932507024843	0.0154018061979967	0.015592441204376	5.68763192955795	0.11604866151368	1.00445451014382	0.0612764060253182	0.0617061096869964	0.00444461815498638	0.0606771127291576	0.0610664568557974	0.26627367968303	0.122269649568055	5.69607864579504	0.284670090903648	1.01382459366936
55	1	A	EMS	EMS	1	1	1	1	E	7	E07	2	1	1	1	2	1	19529	15679	7041	6381	0.274270543264437	55	5.64495825006513	0.0812397510210314	5.28791140901574	0.12041813924362	0.936791096781449	0.012290897789717	0.0126047168654986	0.671044475778732	0.0470768089382505	0.0470420774951573	0.936598616419469	0.0118930444758008	0.0120457049583701	5.64509272515622	0.0813875197543736	0.993808348849779	0.0456308400762519	0.0467294294356538	-0.00621089891362528	0.0460990231471961	0.0467950784644915	0.244952801624273	0.0945889748652752	5.65353944139331	0.263349212844891	1.00298076863707
57	1	A	SHAM	SHAM	1	1	1	1	E	9	E09	2	1	1	1	2	1	17918	12553	5438	4574	-0.243096233456458	56	5.68458102218877	0.0989536503838796	5.32339030949901	0.146923802894612	0.936039006404059	0.0147309137082612	0.0154012421712553	0.712836767924087	0.0392645012198332	0.0392443418234092	0.935996786203086	0.014377006502304	0.0148562918239836	5.68444891062003	0.0991964613899696	0.991488769024077	0.0551639238975704	0.0571994539292413	-0.00854765834420514	0.0556129938681059	0.0574159669264588	0.240246487341067	0.116328425341622	5.69289562685712	0.258642898561685	1.00061812194371
58	1	A	EMS	EMS	1	1	1	1	E	10	E10	2	1	1	1	2	1	18375	12596	5550	4495	-0.31854213872892	56	5.69249881566668	0.103307433628852	5.3403469330563	0.143814075015962	0.937106642409604	0.0134982112394079	0.0140274332148662	0.717966208007286	0.0384963513385735	0.0384773514294615	0.936695540749786	0.0129881514877964	0.013388284368021	5.69262482086063	0.103835866260132	0.994182937230822	0.0503956431707376	0.0515920741369212	-0.00583404777941836	0.0504798486060997	0.0518009163747095	0.245710750208118	0.104352739667666	5.70107153709772	0.264107161428736	1.00336231187608
60	1	A	EMS	EMS	1	1	1	1	E	12	E12	2	1	1	1	2	1	18830	14479	6025	5369	-0.0522470615649433	56	5.68777947775514	0.0966615029285067	5.32224411085243	0.139304015723193	0.934334208285932	0.0149729929295246	0.0151427588248398	0.754686064719115	0.031584934730578	0.0315744378839746	0.934231461149936	0.0147562595349912	0.0148218290137324	5.68755263043353	0.0965374990886203	0.984747472681999	0.056016253006225	0.0564053868799349	-0.0153700435908775	0.0567209785428515	0.056949290689405	0.226441639582609	0.116308088502887	5.69599934667062	0.244838050803227	0.993751662193079
62	1	A	EMS	EMS	1	1	1	1	F	2	F02	2	1	1	1	2	2	16547	12695	5554	4755	-0.373230348888095	56	5.6892751089568	0.142139265351305	5.34671864509347	0.177480747361406	0.937642347159481	0.0147870521905404	0.0153297836699491	0.706243047643242	0.0406728968251052	0.04065049087897	0.936782225066435	0.0136236220042966	0.0143255790311104	5.68951790789023	0.142060378203545	0.994518191105241	0.0526448896699101	0.0554963725440809	-0.00549688914575753	0.0530477717604956	0.0555384759325258	0.246388621851194	0.112173706027705	5.69578835176193	0.261565930017804	1.00208422285958
63	1	A	EMS	EMS	1	1	1	1	F	3	F03	2	1	1	1	2	2	18131	13392	5601	4936	0.019912913638076	56	5.66770458347645	0.0961430287834606	5.3115271181098	0.136458258460663	0.936178632128234	0.0139077029432798	0.0142070944845697	0.749186605181059	0.0329925500161615	0.0329805869395387	0.935933089404142	0.0137435459409587	0.0138450053089611	5.66796625887702	0.0960121597594074	0.991243906448298	0.0524978692817936	0.0531550620905762	-0.00879465339463102	0.0531260919946582	0.0534577046916599	0.239748378168915	0.108157072221626	5.67423670274872	0.254925686335525	0.998759864343383
64	1	A	EMS	EMS	1	1	1	1	F	4	F04	2	1	1	1	2	2	19054	15157	6984	5882	0.09631880395307	55	5.65936989992927	0.0916723341686978	5.30365279866791	0.122483548885845	0.936611614847932	0.0126146478690657	0.013201006399915	0.832423470294589	0.0184098488693319	0.0184077694546227	0.936369052735484	0.0125998877394928	0.0130881424057848	5.65930785200549	0.0916029862337411	0.992922274400352	0.0485308807771382	0.0504887267191683	-0.0071028916234814	0.0488678642396863	0.0506710209609736	0.243157613296623	0.10238211550466	5.66557829587719	0.258334921463233	1.00046389969134
65	1	A	EMS	EMS	1	1	1	1	F	5	F05	2	1	1	1	2	2	18101	13954	5203	4813	0.329257924166941	56	5.6852686821156	0.0743658404650834	5.32958498234098	0.115690145956135	0.936993049418692	0.0135313626515635	0.0133966217543727	0.715219552108032	0.0390084461633805	0.038988678358761	0.936979777257006	0.0133402140558481	0.0131008065604059	5.68528927935069	0.0740271221091908	0.995283079056862	0.0516534832780574	0.0509525398840663	-0.00472808072175482	0.0520081799074539	0.0509368118983499	0.247933480635239	0.102830366935897	5.69155972322239	0.263110788801849	1.00286080829497
67	1	A	EMS	EMS	1	1	1	1	F	7	F07	2	1	1	1	2	2	18448	14174	5781	5279	0.173985038375462	56	5.68585992225555	0.0922823082888168	5.33369508416	0.130092032431174	0.937670662633036	0.0139522982952605	0.0141155008048465	0.794454221791617	0.0251881760718097	0.0251828512677807	0.937254735246557	0.013818611787485	0.013919369251472	5.68591533696595	0.0924026526726851	0.996349637652773	0.0536059361076782	0.0543062881534551	-0.00365704117824993	0.0539825644370222	0.0541817383647271	0.250083653023481	0.109363363749158	5.69218578083765	0.265260961190091	1.00394367784445
68	1	A	EMS	EMS	1	1	1	1	F	8	F08	2	1	1	1	2	2	18563	14016	5927	5367	0.0422152628531962	57	5.68687301138621	0.0953088997427425	5.3278614033312	0.134266511966648	0.935919824158128	0.0143077943134887	0.0145560637820968	0.779583450597021	0.0274907446057071	0.0274838224496191	0.935678544098341	0.0143555435333054	0.0143158390718248	5.68691588922323	0.0954685383449771	0.990266602691215	0.0548805358012475	0.0551579929599551	-0.00978107645937429	0.0557066508606559	0.0553692397070567	0.237757833028143	0.112456155044791	5.69318633309493	0.252935141194753	0.997767614613086
69	1	A	EMS	EMS	1	1	1	1	F	9	F09	2	1	1	1	2	2	17422	11490	5359	3869	-0.558365416788209	56	5.69313224421548	0.119181058556365	5.33034273806873	0.151943226238937	0.935867049228519	0.0136555089487679	0.0145860039574154	0.793923871878074	0.0249323520448109	0.02492718780314	0.935456610926667	0.0137380085267674	0.0142644466194298	5.6931833211177	0.119170298052971	0.989416096317422	0.0528492636868274	0.0542467629234512	-0.0106403115545184	0.0534795544446028	0.0547860216231338	0.236022314891182	0.110790450683447	5.6994537649894	0.251199623057792	0.996904101387136
70	NULL	A	NULL	NULL	1	1	1	1	F	10	F10	2	1	1	1	2	2	17734	12357	5735	5497	-0.46548892102507	55	5.65017731242695	0.140977508848024	2.9106244048892	0.196214205523999	0.515106923851082	0.0332777936305389	0.03542308747854	0.570723660455792	-0.00984336128397019	-0.00984304338893071	0.51538891083775	0.0332935517777632	0.0353984418919193	5.65019175125846	0.141533885658531	0.518115623074499	0.00474652179844939	0.00479600475134362	-0.657556851061896	0.00917119154916192	0.00924820773043828	-3.04890848998691	0.261598607651772	5.65646219513016	-3.0337311818203	0.518395997765381
72	1	A	SHAM	SHAM	1	1	1	1	F	12	F12	2	1	1	1	2	2	19249	14981	6154	5501	0.0876949236421369	56	5.68405771340313	0.0875505732754888	5.33377161466127	0.12735379696827	0.937279532923545	0.0141553581089915	0.0145613739439603	0.774475975512619	0.0286421365896816	0.0286343080405304	0.936980611877575	0.0142548213936854	0.0143260573965592	5.68404134035098	0.0874371221006937	0.99528631307082	0.0550582974887346	0.0556154442179295	-0.00472483138619198	0.0554602875604103	0.0556172541536523	0.247940007370854	0.112240120379662	5.69031178422268	0.263117315537464	1.00286409176692
73	1	A	EMS	EMS	1	1	1	1	G	1	G01	2	1	1	1	2	3	20348	15641	6122	5541	0.171279311578547	55	5.6708875407071	0.0774589843864538	5.31171360750663	0.119219220104062	0.935954182779002	0.0142597720457544	0.0141608003767871	0.705302758929047	0.0406728968251053	0.0406504908789728	0.936011061324901	0.0143484238454649	0.013803219955825	5.67093898407018	0.0778114912678221	0.991543662032292	0.0546136598333663	0.0531991134442041	-0.00849229565066563	0.0552739862282874	0.0534174141091007	0.240358118840284	0.108180723254829	5.6772311691558	0.253533591654612	0.998065723421804
74	1	A	EMS	EMS	1	1	1	1	G	2	G02	2	1	1	1	2	3	19748	15316	7717	7098	0.641183030886813	56	5.66356053370713	0.0858568456362803	5.35091736215624	0.129615569909655	0.944507620810898	0.0131665010980951	0.0132277954483192	0.669177580838655	0.0486143016100197	0.0485760582830456	0.944307846373803	0.0126541578106066	0.0125631834037624	5.66359827645706	0.0860950341516451	1.02450737970899	0.0516743058121854	0.0518426411642006	0.0242118911668926	0.0505845858951686	0.0503129742505773	0.305239008177767	0.0987996013916516	5.66989046154268	0.318414480992095	1.03146662740842
75	1	A	EMS	EMS	1	1	1	1	G	3	G03	2	1	1	1	2	3	18255	14098	6441	5628	0.270621160285887	56	5.66002927273713	0.0880861011226686	5.31411697171485	0.127788118356329	0.938678420245702	0.0140257247245657	0.0144598265887105	0.704120127459209	0.0414411801571944	0.0414174812729024	0.938454159297546	0.0135444243382743	0.0140145224228572	5.65997905225006	0.0883063051572489	1.00102910346376	0.0529215030247069	0.055467762021911	0.00102857427812176	0.0529490023381745	0.0549226926079492	0.259463153158098	0.110659554725355	5.66627123733568	0.272638625972425	1.00767696696025
77	1	A	EMS	EMS	1	1	1	1	G	5	G05	2	1	1	1	2	3	18816	14421	6063	5441	0.247557770281845	56	5.67742626323117	0.0918387797075669	5.29846225381609	0.132801218063079	0.932820327771226	0.0144928406509386	0.0146743165308076	0.741148175299573	0.0337603948664174	0.033747577333482	0.93269924028628	0.0145244339225749	0.0143512784477724	5.67730196733552	0.0918542521083467	0.978971305983516	0.0542905083633433	0.0542372362528359	-0.0212529463974857	0.0554283195845773	0.054960524594528	0.214459667358047	0.113185447316659	5.68359415242114	0.227635140172375	0.985326624592318
78	1	A	EMS	EMS	1	1	1	1	G	6	G06	2	1	1	1	2	3	19083	14794	6451	5701	0.172603413203659	56	5.67935793140534	0.0881622574453177	5.31541610913819	0.131123982356239	0.935532733553392	0.0134400403755491	0.0135226339404787	0.727076577934768	0.036704176446763	0.0366877071769361	0.935451307715531	0.0132121194218108	0.013117992552848	5.67934988930206	0.088461367765847	0.989395791067089	0.0503977068025107	0.0502846464552877	-0.0106608342231594	0.0511429594177224	0.0506359833718077	0.235980843762546	0.102702712307116	5.68564207438768	0.249156316576874	0.995889365991856
79	1	A	EMS	EMS	1	1	1	1	G	7	G07	2	1	1	1	2	3	17991	13136	5750	5192	-0.0209798761148345	57	5.67862762158594	0.109604139127374	5.33079817701819	0.156522995534765	0.938050075632516	0.0144412736772759	0.0150025621700009	0.673628408600829	0.0465643610837506	0.0465307505658649	0.937570010196884	0.0137184330169193	0.0141454894775724	5.67881596013128	0.109875800558487	0.99757541157221	0.0536202091683755	0.0549521879119014	-0.00242753283796556	0.0537053200268475	0.0549304993401223	0.252549105527443	0.110391591858317	5.6851081452169	0.26572457834177	1.00417746995568
80	1	A	SHAM	SHAM	1	1	1	1	G	8	G08	2	1	1	1	2	3	20572	15385	6423	5720	0.153045871650474	57	5.68448853701067	0.0827627060021205	5.33158822680994	0.124659585478977	0.93745681678668	0.0140890821700908	0.0140388764402785	0.747728669722411	0.0333764675271987	0.0333640821365149	0.937269791615803	0.013710194568046	0.0137530560122656	5.68430529713853	0.0828348119957398	0.996408107375617	0.0534677329090051	0.0534525456468337	-0.00359835896053405	0.0535636688435372	0.0534394388821885	0.2502013938846	0.107631402338398	5.69059748222415	0.263376866698927	1.00299468420997
82	1	A	EMS	EMS	1	1	1	1	G	10	G10	2	1	1	1	2	3	18658	14013	5890	5090	0.046116168723116	57	5.68713461762502	0.0898206318929207	5.33812964637796	0.128612422354079	0.937619060707748	0.0147983918780757	0.014667593506384	0.73761269137804	0.0351682143605089	0.0351537263890484	0.937207654578342	0.0145396869938852	0.0143330767417495	5.68703436978848	0.0897555225505947	0.996166849609276	0.0566092370507105	0.0556830795251697	-0.0038405157574518	0.0566916966784628	0.0556700553575561	0.249715482115068	0.112177273516397	5.6933265548741	0.262890954929396	1.00275022672588
83	1	A	EMS	EMS	1	1	1	1	G	11	G11	2	1	1	1	2	3	18669	14301	5927	4978	-0.0467817085622162	56	5.67466231118842	0.103468120632626	5.2968154126197	0.124897044879474	0.931978064787674	0.0125674610214508	0.0132082334934051	0.883374948151682	0.00856493549231352	0.00856472606566842	0.931753060899787	0.0126087346208887	0.0131780118084525	5.67468895753745	0.103397463414051	0.975438810103419	0.0469991413523818	0.0494204540314802	-0.0248678476102485	0.0481502298642345	0.0502909128786544	0.207060541521614	0.103899431397263	5.68098114262307	0.220236014335942	0.981747278449341
85	1	A	EMS	EMS	1	1	1	1	H	1	H01	2	1	1	1	2	4	19951	14541	6068	5312	-0.127704378384891	55	5.67667486578249	0.0974299194978988	5.33651376712308	0.139373573746256	0.939536353986712	0.0150207579624254	0.015005698812548	0.793646752014587	0.0256998340439593	0.0256941781970791	0.939438166433365	0.0148609490720883	0.0147889573405498	5.67648661607235	0.0974021790771047	1.00490104686311	0.0584955956394298	0.058246321371556	0.00488907543477067	0.0584728764301164	0.0578159095867861	0.26715809369736	0.115312106715405	5.67914708875708	0.27863699436132	1.01073266246278
87	1	A	SHAM	SHAM	1	1	1	1	H	3	H03	2	1	1	1	2	4	20246	15150	6664	5729	-0.0409952363422152	56	5.67951965207066	0.0951703442146414	5.33244249984548	0.136078863072572	0.93796964736742	0.0149650839270658	0.0152522296637326	0.767302939645081	0.0300494968197031	0.0300404570960929	0.937846790363036	0.0149593583740507	0.0149752525254438	5.67963068839579	0.0952520773472535	0.998654012295243	0.058212415152819	0.0587644714777135	-0.00134689435986344	0.0583767871038361	0.0584175103535102	0.254713525993711	0.117794725953112	5.68229116108052	0.266192426657671	1.00441350565559
88	1	A	EMS	EMS	1	1	1	1	H	4	H04	2	1	1	1	2	4	17266	13716	6362	5471	0.111256585248749	55	5.66815472848959	0.0932608304822862	5.28912944535133	0.120832586331467	0.932407674269723	0.0124674879330343	0.013893877887099	0.844002962287658	0.0155967358367478	0.0155954713434948	0.932188637300906	0.0124137271029135	0.013817424987168	5.66808424294896	0.0932843474449452	0.977061758404808	0.0462739625517767	0.0520290605556818	-0.0232054166497482	0.0474829292027146	0.0527956688577802	0.210466750322615	0.109011703529211	5.67074471563369	0.221945650986575	0.982571968415459
89	1	A	EMS	PETITE	1	1	1	1	H	5	H05	2	1	1	1	2	4	982	627	350	317	-0.253433766389242	50	5.43609900948743	0.164148690109619	5.18134042929131	0.217552729814673	0.954927864370246	0.0257830458210285	0.0310136970252839	0.692048786776354	0.0483580371025433	0.0483203948183956	0.952935500443267	0.0286388676275913	0.0302576464080036	5.43768447125828	0.166748209742288	1.06113127109009	0.126720929394008	0.128524033791192	0.0593355759090124	0.11990717567323	0.120843960421027	0.372707288756077	0.228955625754869	5.44034494394301	0.384186189420037	1.06761206665589
90	1	A	EMS	EMS	1	1	1	1	H	6	H06	2	1	1	1	2	4	19832	14605	6517	5178	-0.328949023417825	56	5.67947059672828	0.113567201800912	5.30204613949382	0.145040309481388	0.932680622601681	0.0139069456079279	0.0143996980441632	0.831027450678656	0.0178983534101898	0.017896442525329	0.932330994378097	0.0137972756236397	0.0142540421644253	5.67956161345449	0.113670600421222	0.977593380873994	0.0511539700444979	0.0534033822802113	-0.022661463039842	0.0523940108573365	0.0543421370136149	0.211579990087764	0.111766700972953	5.68222208613922	0.223058890751724	0.98310972848522
92	1	A	EMS	EMS	1	1	1	1	H	8	H08	2	1	1	1	2	4	19160	13264	5674	5070	-0.0232473055348743	57	5.69449198085088	0.0974763074990341	5.34347259904747	0.147695106050605	0.938319497316177	0.0157501796879045	0.0155608727036441	0.689935715736613	0.0436182511828651	0.043590620722413	0.938054748308689	0.0154921680765144	0.0149801467788274	5.69460613232563	0.0980818900299603	0.999465953578841	0.0604843369121596	0.0582604075310774	-0.000534189075247	0.0605796654276067	0.0582005985439167	0.256339757818969	0.116594554220236	5.69726660501036	0.267818658482929	1.00523482083058
93	1	A	EMS	EMS	1	1	1	1	H	9	H09	2	1	1	1	2	4	22850	16512	8790	8297	0.210213376196229	56	5.65254608450998	0.0957785737346026	5.39419067548489	0.144396197282986	0.952576682808062	0.0160603290768899	0.0161147023596219	0.639381897195536	0.0554077367844542	0.0553511400962083	0.952188756096989	0.0151665196482217	0.0153056734140309	5.65283241571332	0.0960767583501996	1.05786280122767	0.0663252804891776	0.0670834950139468	0.0562506475486854	0.0627698894337322	0.0630098694673214	0.366867745496886	0.120203948571359	5.65549288839805	0.378346646160846	1.06430586219106
95	1	A	EMS	EMS	1	1	1	1	H	11	H11	2	1	1	1	2	4	20907	14739	6042	5006	-0.161742759117075	57	5.68531663833757	0.106889616566176	5.33483660453013	0.143948379084406	0.937055527699761	0.0150270552049144	0.0155545132807673	0.804760632220184	0.0232695738681427	0.0232653752829181	0.936784915466788	0.0147514183969202	0.0153535875193766	5.68540629193838	0.106760634372897	0.994528599936664	0.0568284281131499	0.0604017989271849	-0.00548642299572657	0.0571826500912255	0.0599448106771271	0.246409660792302	0.122086377507086	5.68806676462311	0.257888561456262	1.00024046526258
98	1	B	EMS	EMS	1	1	1	2	A	2	A02	1	1	2	2	3	1	14538	10525	4575	3964	0.0290765490377307	56	5.66245513601289	0.102012347022059	5.24292015224204	0.13946349964634	0.925281925801326	0.0131551424713195	0.0135287656438822	0.677570312724252	0.0437463268365063	0.0437184524547363	0.924910021735524	0.0125352733000704	0.0128048707713681	5.66216520235878	0.101834138490926	0.950654249181943	0.0438981591383188	0.0452762405601205	-0.0506048480765144	0.046547709333781	0.0474135229532006	0.153547952534723	0.100419260921959	5.67688226766617	0.180796948514872	0.96310897935741
99	1	B	EMS	EMS	1	1	1	2	A	3	A03	1	1	2	2	3	1	18543	14343	6637	6110	0.363769414306907	55	5.64205971483549	0.0773397757496592	5.28673258636922	0.116909792592029	0.936967568563135	0.0125706559812494	0.0128194892671837	0.623630355364401	0.0555359618713057	0.0554789718285293	0.936753122267552	0.012005954916285	0.0121848938789128	5.64212833650545	0.0773291484877764	0.994405610105521	0.0465447143927216	0.04718975404522	-0.00561009719382739	0.0467148990092199	0.047296480350028	0.246161038236684	0.0954054147065379	5.65684540181284	0.273410034216833	1.00806891234634
100	1	B	EMS	EMS	1	1	1	2	A	4	A04	1	1	2	2	3	1	17461	13434	5629	5034	0.131785569900785	56	5.67263854125765	0.0840178065855113	5.3153835407069	0.118784478854292	0.936252241334381	0.0131549861690594	0.0132606873908058	0.789015118355162	0.0259556680561169	0.0259498416617245	0.936030001396458	0.0128426020527313	0.0130726438770435	5.67283833967526	0.0839269365525573	0.991616503042117	0.0495888420870021	0.0504715033458623	-0.0084188361787613	0.0499403637498029	0.0506364388776574	0.240506230511143	0.102618911217847	5.68755540498265	0.267755226491292	1.00520275997936
101	1	B	EMS	EMS	1	1	1	2	A	5	A05	1	1	2	2	3	1	17812	13584	5834	5149	0.050549121339631	56	5.6649163780024	0.0863092403171903	5.30051722558145	0.124840114325921	0.93504370487061	0.0135513170006933	0.0136976947141309	0.752493224663518	0.032224744025518	0.0322135965456025	0.934832429669097	0.0133852415919554	0.0134087964804857	5.66504112538208	0.0862330025726938	0.987031967741989	0.0510620056651159	0.0511318650769238	-0.0130528512768202	0.051655257214485	0.0516110210130329	0.231141215391308	0.10493973672978	5.67975819068947	0.258390211371457	1.00049158310331
103	1	B	SHAM	SHAM	1	1	1	2	A	7	A07	1	1	2	2	3	1	20249	15308	6624	5935	-0.0130072777702259	57	5.68569606812145	0.0916114756800792	5.32015459788763	0.13213843365767	0.934683101532855	0.0140221503255891	0.0143504337138628	0.74855268442421	0.0327366104129695	0.0327249234748925	0.934407188129089	0.0137526970226616	0.0140382911878937	5.68597918871677	0.0915265360217859	0.985414363102481	0.0524261032649718	0.0534383344780824	-0.0146930530677231	0.0530153136857605	0.0539627341303879	0.227815825141135	0.110038699405087	5.70069625402416	0.255064821121284	0.998829294327379
105	1	B	EMS	EMS	1	1	1	2	A	9	A09	1	1	2	2	3	1	20382	15332	6493	5829	0.0483811086076935	56	5.67428322736956	0.0892652226489657	5.3095024149667	0.120794924346411	0.935622993125557	0.0128765047465002	0.013405880855614	0.779632722101493	0.0274907446057071	0.0274838224496271	0.935560015301386	0.0129295368002123	0.013187639562941	5.67439872424036	0.0893959688345995	0.989812185471214	0.0496085765140181	0.0504766272280458	-0.0102400654962707	0.049973952118266	0.0508555151347785	0.236830937443699	0.103007215979487	5.68911578954775	0.264079933423848	1.00334860058029
106	1	B	EMS	EMS	1	1	1	2	A	10	A10	1	1	2	2	3	1	19110	14382	6090	5357	0.109808459549092	56	5.67806108211855	0.0840232411192935	5.32006731629869	0.121124707221701	0.936448290059973	0.0128257683207558	0.0130459413970463	0.726586092096582	0.0369601867483062	0.0369433706415786	0.936368437037266	0.0126447396007426	0.012672335034436	5.67813097397643	0.0839798010805553	0.992919899836411	0.0487009898199963	0.0489762934308705	-0.00710528300785593	0.0491921387630968	0.0491210427465013	0.243152798093689	0.0993156492900676	5.69284803928382	0.270401794073839	1.00654216134408
108	1	B	EMS	EMS	1	1	1	2	A	12	A12	1	1	2	2	3	1	13089	10933	5400	5025	0.0709057065181233	53	5.57083353974842	0.109529696310932	5.2675987702477	0.159082701270416	0.94519228261978	0.0162333425116593	0.0162163872743585	0.673656283946483	0.0487424362504933	0.0487038900153691	0.944999434244459	0.0153805218206199	0.0154007744135974	5.57076589443596	0.109657981013034	1.0273528949436	0.0631813118282097	0.064674020436778	0.0269854892006392	0.0618421960135819	0.0621131227696429	0.310647224817584	0.122588342888141	5.58548295974335	0.337896220797733	1.04192632128671
109	1	B	EMS	EMS	1	1	1	2	B	1	B01	1	1	2	2	3	2	15735	11304	4403	3728	-0.0422276459446254	56	5.67308406371998	0.102920184665448	5.29182599393534	0.133834460298194	0.931732394368465	0.0116756873928463	0.0120422558977744	0.761259072837804	0.0300494968197031	0.0300404570960892	0.93104047659055	0.011018350526838	0.0115975731372629	5.67328557767056	0.103164166165414	0.972795626898168	0.0407892029099706	0.0431563503971558	-0.0275812632223491	0.041889254378102	0.0441124422531397	0.201488130046819	0.0912370464999156	5.69047061834803	0.226188044746164	0.984624503579222
110	1	B	EMS	EMS	1	1	1	2	B	2	B02	1	1	2	2	3	2	16684	13322	6897	6055	0.0228780552186993	56	5.64145427925307	0.111905199928891	5.25734252650518	0.139986855450797	0.931427614848002	0.0129964716164166	0.0132724687597264	0.819633669317721	0.0198165118418868	0.0198139185101927	0.931052751291944	0.0127864994091893	0.0130885490091985	5.64151998124217	0.112074655143475	0.972841032657926	0.0473271768718454	0.0486286326914565	-0.0275345887071459	0.0487786126408225	0.0497242307046956	0.201584117973403	0.102796156971707	5.65870502191964	0.226284032672749	0.984671044822822
111	1	B	EMS	EMS	1	1	1	2	B	3	B03	1	1	2	2	3	2	16937	12950	5941	5200	0.066615306170049	56	5.67331679025962	0.100520466897267	5.30727883635548	0.136486800140435	0.934403152575903	0.0132357548537764	0.0134538054873485	0.749403995161433	0.0326086422200309	0.0325970917425644	0.934134942629542	0.0130674282164437	0.0130536286105791	5.6733354184875	0.100524691988638	0.984381571353677	0.0492233349487078	0.0497460582609374	-0.0157416814911237	0.0500583273247686	0.0502392506934183	0.225686865100434	0.102653982924025	5.69052045916496	0.250386779799779	0.99650018336331
114	1	B	EMS	EMS	1	1	1	2	B	6	B06	1	1	2	2	3	2	17733	14324	7025	6513	0.517962454934003	56	5.66010432191821	0.0881600078309627	5.33260608543182	0.121850187952952	0.941228122258828	0.0121896388057071	0.0124900244271871	0.785627639903316	0.0274907446057071	0.027483822449615	0.940807409596534	0.0121485739307464	0.0122363168305698	5.66013697684651	0.0883824465885802	1.01033865898699	0.0486043648466645	0.0487795480567211	0.0102855805784099	0.0479094339371251	0.0481833555884105	0.277865578197614	0.0955419223750808	5.67732201752398	0.302565492896959	1.02310639246818
115	1	B	EMS	EMS	1	1	1	2	B	7	B07	1	1	2	2	3	2	17929	14373	5999	5544	0.439017161943036	56	5.66178901978502	0.0788738302328642	5.30275938267455	0.111302491358689	0.93646172575424	0.0120960578184576	0.0127599108325262	0.744592908454959	0.0338883728497827	0.0338754090657971	0.936287638078814	0.0119542500071938	0.0124962534931964	5.66185971507395	0.0788727092395218	0.992608410200984	0.0460761695250012	0.0483927295735831	-0.00741904301091743	0.0464422617794944	0.0484858540734249	0.242520950160533	0.0981943046430012	5.67904475575142	0.267220864859878	1.00493275475713
116	1	B	EMS	EMS	1	1	1	2	B	8	B08	1	1	2	2	3	2	19088	15239	6158	5742	0.413847905556145	56	5.66781797641512	0.0808341929199168	5.28557418418286	0.114804699173181	0.932296291195984	0.0127068104295267	0.0127748413332515	0.74820173701245	0.0324806750939404	0.032469260010241	0.932073162219526	0.0121820627427999	0.012517461822553	5.66765032449775	0.0812269177881293	0.976630962245489	0.0453194745403504	0.0467653239618823	-0.0236464238226513	0.0465339886426374	0.0477014826173666	0.209563735170899	0.0980716007142432	5.68483536517522	0.234263649870244	0.988555751016518
118	1	B	EMS	EMS	1	1	1	2	B	10	B10	1	1	2	2	3	2	18494	14288	6431	5687	0.174200404967562	56	5.67083842762417	0.0883567162924504	5.31041076976531	0.12376905015678	0.935640378779224	0.012286318257847	0.0126433812595603	0.736207117352726	0.0351682143605089	0.0351537263890421	0.935331591035863	0.0119806911635955	0.0122340399937064	5.67083093078715	0.0885683200904416	0.988937636717681	0.0458143559415877	0.0469502880852336	-0.0111240062559056	0.0464098247140111	0.0472639953834178	0.235044658931348	0.0959823443949378	5.68801597146462	0.259744573630693	1.00117018446215
119	1	B	EMS	EMS	1	1	1	2	B	11	B11	1	1	2	2	3	2	16793	11014	6524	6263	1.02629624023306	59	5.74608826377238	0.0753409589631651	5.68464162616264	0.111986812584809	0.989902724901457	0.0101830469721868	0.0102447810128951	0.66710406543438	0.0561771146994452	0.0561181304901487	0.990061876113741	0.00929915838369195	0.00947951076739185	5.74589551979613	0.0754165643660956	1.25023093009239	0.0544783778222667	0.0549660846298163	0.223328278325034	0.0436339715164579	0.0442130596047275	0.663035669366165	0.0732442877459434	5.7630805604736	0.68773558406551	1.26899776587027
120	1	B	EMS	EMS	1	1	1	2	B	12	B12	1	1	2	2	3	2	18866	14178	6201	5498	0.2480158873258	57	5.69248338109898	0.0864276557109355	5.38363048215336	0.117805766482558	0.944813715409366	0.0126413444779229	0.0147303916055609	0.807983529869895	0.0240369934137699	0.0240323656768748	0.944541644777535	0.0125164754977606	0.0145841023007685	5.69251864949773	0.086577435300192	1.02546761318914	0.0514301158056463	0.0625303694822358	0.0251487165124099	0.0500994457469393	0.0593505957545686	0.307067309808741	0.118950164529358	5.7097036901752	0.331767224508086	1.03861368376091
121	1	B	SHAM	SHAM	1	1	1	2	C	1	C01	1	1	2	2	3	3	18222	13885	5937	5321	0.22993958370864	56	5.67253470472932	0.0832229591570126	5.31598293352033	0.120372743515058	0.936712009744999	0.0131719585612406	0.0136906396524977	0.762626202430581	0.030689244998233	0.030679615757699	0.936788135820588	0.0130061519882757	0.0134484691277645	5.67240871761942	0.0832277196796488	0.994541059379828	0.0503272873181341	0.052029905076297	-0.00547389508503968	0.0505617418030766	0.0521243821477902	0.246434843968223	0.105162143851855	5.6885710592764	0.270031484578105	1.0063545380502
123	1	B	EMS	EMS	1	1	1	2	C	3	C03	1	1	2	2	3	3	17232	13728	5870	5404	0.311861951546096	56	5.65809108862852	0.0841037276730539	5.30017467790836	0.12050403495607	0.936438730639979	0.0133217260403168	0.0136439697980803	0.70558329169206	0.0408009406939181	0.0407783226112916	0.936115262056337	0.0131333762124238	0.0132469227567993	5.65819707586353	0.0841469833769255	0.991944537297849	0.0508126796952612	0.0514536470363382	-0.00808808328271977	0.0510106529360423	0.0514594759249515	0.241172969069184	0.1045460824992	5.67435941752051	0.264769609679066	1.00369601817669
124	1	B	EMS	EMS	1	1	1	2	C	4	C04	1	1	2	2	3	3	16714	12738	5867	4975	-0.0626572504217378	55	5.65137494391304	0.092503446659044	5.29665641654701	0.121464159699101	0.936349578096076	0.0124515109770716	0.0127907002263224	0.822190896790371	0.0202001605695376	0.0201974137071611	0.936134751716549	0.0123824535128031	0.012646838262037	5.65140467604671	0.0926092510003431	0.992019553009097	0.0475915806755995	0.0486191954437106	-0.00801246119686294	0.0478784675335035	0.0488892696362898	0.241325378112318	0.0987718477243315	5.66756701770369	0.2649220187222	1.00377282505639
125	1	B	EMS	EMS	1	1	1	2	C	5	C05	1	1	2	2	3	3	16790	12882	5909	5198	0.0525686966782901	56	5.65557203199308	0.099898916943652	5.29214083363655	0.136509506178298	0.935742496558437	0.0127956475725953	0.0131929406037092	0.744808151562884	0.0337603948664174	0.0337475773334853	0.935141649429831	0.0125970232298862	0.0127692493241509	5.65542222773181	0.0999814277748985	0.988211611926625	0.047700471657641	0.0489632283948811	-0.0118584220574196	0.0484198786151603	0.0492984219077254	0.233559314949337	0.100246268125708	5.67158456938879	0.257155955559219	0.999873960835223
126	1	B	EMS	EMS	1	1	1	2	C	6	C06	1	1	2	2	3	3	17076	13986	6596	6081	0.499171051251846	55	5.6576571351687	0.0844323134036847	5.30370783432874	0.119376458167809	0.936092804583721	0.0123824038713252	0.0126706353267357	0.768254673076826	0.029665659741661	0.0296569618991113	0.93578763575527	0.0120259621618678	0.0123900756609252	5.65774480360961	0.084636296696963	0.990685212075703	0.046076393967986	0.0477486778214612	-0.0093584418575648	0.0465331058802825	0.0479649057649896	0.238610930146358	0.0972670244792777	5.6739071452666	0.26220757075624	1.00240662373883
128	1	B	EMS	EMS	1	1	1	2	C	8	C08	1	1	2	2	3	3	17782	14106	6219	5670	0.123134445535101	55	5.65029246340961	0.085843388222305	5.25989595979709	0.117399954706932	0.930093086971946	0.0129460225091544	0.0130976635045306	0.790663468262069	0.0246765312791862	0.0246715243384872	0.92986098750327	0.0129039698007119	0.0129388032849704	5.65032189847106	0.0859781573173638	0.968452794915214	0.0474305654937079	0.0476558951645258	-0.0320555377327518	0.0488967215313564	0.0489385581693129	0.19226452121126	0.101683128913573	5.66648424012805	0.215861161821142	0.979643357727162
129	1	B	EMS	EMS	1	1	1	2	C	9	C09	1	1	2	2	3	3	17619	12886	5948	4913	-0.189926553791122	55	5.6591219602699	0.103629232549996	5.29077784352963	0.134417919194417	0.934934200048786	0.0123878661151685	0.0129168920231882	0.793838979070773	0.0249323520448186	0.0249271878031356	0.934512585592876	0.0122308288977433	0.0126458313317163	5.65913955353433	0.103694320941931	0.985814790283276	0.0463902076533563	0.047945552362178	-0.0142867814928383	0.0469279053871665	0.0485421110084786	0.228640033656754	0.098646779569694	5.67530189519132	0.252236674266636	0.997419909696463
130	1	B	EMS	EMS	1	1	1	2	C	10	C10	1	1	2	2	3	3	18118	13541	5794	5005	0.0675407555733938	55	5.65977553049998	0.0849624133319729	5.30364308577003	0.11808070663899	0.936342137372065	0.0128032425069567	0.0129782729478985	0.766992880000462	0.0299215501496475	0.0299126253637624	0.936108300236209	0.0125631321445857	0.0127246737828344	5.65995800596272	0.0849665329484339	0.991917743910503	0.0483794221562476	0.0490984638231049	-0.00811509458032904	0.0488257768896917	0.0492840296536872	0.241118527448515	0.0997661352379664	5.6761203476197	0.264715168058397	1.0036685850371
131	1	B	EMS	EMS	1	1	1	2	C	11	C11	1	1	2	2	3	3	18573	14815	6155	5680	0.308294980943091	55	5.65916956010749	0.0778774280403097	5.29433503282754	0.11526793000498	0.935740825511436	0.0128726965759785	0.0131644453285929	0.688172944311766	0.0437463268365063	0.0437184524547388	0.935693497857171	0.0126928921769015	0.0127603150471238	5.65922004751675	0.0780796571724015	0.99032396268243	0.0484791776288626	0.0489611571096401	-0.00972315442638791	0.0491441573684745	0.0492813564327493	0.237874771781184	0.0998103693492602	5.67538238917373	0.261471412391066	1.00203674870562
133	1	B	EMS	EMS	1	1	1	2	D	1	D01	1	1	2	2	3	4	18117	13853	5935	5314	0.109501009210439	56	5.66358220696224	0.0875720230920956	5.31117830249599	0.121629607807426	0.937150358805774	0.0136296248316521	0.0137717490280406	0.767687199773502	0.0299215501496475	0.0299126253637587	0.936916981697514	0.0134178603874187	0.0135216222346708	5.66359796727825	0.0877495788338771	0.995039817389722	0.0516662862044075	0.052362630179337	-0.00497252515163606	0.0520710769718879	0.052445826740602	0.247442419170446	0.105728060693719	5.68243986034557	0.268161661754689	1.00540822247913
134	1	B	EMS	EMS	1	1	1	2	D	2	D02	1	1	2	2	3	4	17052	13006	5684	5182	0.230340638091076	57	5.68718995431736	0.0853928696642482	5.36573033558166	0.116633630717866	0.942723053032587	0.0126910474249479	0.0129238488878445	0.830022785955795	0.0198165118418872	0.0198139185101871	0.942780835128407	0.0127335857584465	0.0128138058287616	5.68734891562628	0.0854106356439657	1.01827877621727	0.0516998821104929	0.0517680945218973	0.0181137269694873	0.050551101228068	0.0507824333970129	0.293297774861544	0.0998426880726298	5.7061908086936	0.314017017445787	1.02913369765265
135	1	B	EMS	EMS	1	1	1	2	D	3	D03	1	1	2	2	3	4	17384	13882	5716	5280	0.192302515062929	56	5.65186653001013	0.0840058949637992	5.29021385572192	0.12085676526825	0.935463383587798	0.0137456726896683	0.013767857682878	0.76056551887128	0.0309451512677891	0.030935279222363	0.935402771126969	0.0135264827984288	0.0135424106300722	5.65162667309341	0.0840599786630093	0.989209990405943	0.0513898846915571	0.0520258207925203	-0.0108486439057492	0.0520484679629665	0.0523168577629651	0.235601287480199	0.106299272433197	5.67046856616073	0.256320530064442	0.999456345874154
136	1	B	EMS	EMS	1	1	1	2	D	4	D04	1	1	2	2	3	4	17877	13426	5741	4945	-0.016230123268973	56	5.66714369985563	0.0867164885468335	5.3121202086692	0.120907859876588	0.936873938909997	0.0131452863305248	0.0133940658968808	0.756427236289003	0.0318408553193368	0.0318301013486282	0.936698816923513	0.0131546800668321	0.0131114664529864	5.66722917781629	0.0869239464685896	0.994195603787066	0.0512313943745587	0.050991553450361	-0.00582130719106181	0.0513653041237468	0.0509744226171109	0.245736369897508	0.103135453809016	5.68607107088361	0.266455612481751	1.00454633494709
138	1	B	EMS	EMS	1	1	1	2	D	6	D06	1	1	2	2	3	4	18533	13245	5852	5366	0.143678526235253	56	5.67967132402448	0.0839794654473049	5.30940018530297	0.122561019574575	0.934389137023626	0.0136162198219418	0.0141371992889413	0.707743775828449	0.0399046614258273	0.0398835004850269	0.934274865857907	0.0135109710684027	0.0137574294107316	5.67982039624301	0.0841766972658425	0.984912110511343	0.0511170663281836	0.052057239420397	-0.0152028699798372	0.0519073289791471	0.0527298134751873	0.226781065702751	0.107305765945408	5.69866228931033	0.247500308286994	0.995068488247019
139	1	B	EMS	EMS	1	1	1	2	D	7	D07	1	1	2	2	3	4	17486	13594	5701	5275	0.25276482923809	56	5.67009363773776	0.0816958654890566	5.31733611837285	0.115379588900073	0.937181718808938	0.0128852545951302	0.0130291589341944	0.744305818083782	0.03401635194196	0.0340032407981241	0.936956323648133	0.0126239757356878	0.0127617640152582	5.67018830312303	0.0815858733070743	0.995192208907592	0.0491532359942385	0.0495800018905638	-0.0048193856978904	0.0492356684532041	0.0495956689074519	0.247750073336238	0.100078719438559	5.68903019619035	0.268469315920481	1.00556380437076
140	1	B	EMS	EMS	1	1	1	2	D	8	D08	1	1	2	2	3	4	17455	13525	6272	5686	0.187478865784206	56	5.66168587779714	0.0912017091404806	5.30731094189465	0.125184075615286	0.936833421539395	0.0129468904793636	0.0131086735398207	0.773946301791428	0.0287700736606996	0.0287621397728549	0.936635817587685	0.0130122868760879	0.0128552346601285	5.66161304378613	0.0911324702884831	0.993952088826414	0.0502040690176652	0.0498094900912891	-0.00606627401585006	0.0505569105887979	0.0498973874134834	0.245243715500882	0.100794258405604	5.68045493685345	0.265962958085126	1.00429772190912
141	1	B	EMS	EMS	1	1	1	2	D	9	D09	1	1	2	2	3	4	15940	12534	5176	4686	0.215220277648717	57	5.68669881613389	0.0927459498628919	5.34929015774541	0.116774932959896	0.939915075395701	0.0118289114471015	0.0121685035712601	0.893389841478144	0.00818141340377635	0.00818123086872503	0.939816243923056	0.0118552233870154	0.0121429873801948	5.68673682194671	0.0926617436984339	1.00639667384559	0.0470370169764625	0.048240042024166	0.00637630195525597	0.046668770935632	0.0477323066946068	0.270114659354476	0.0952204132311037	5.70557871501402	0.290833901938719	1.01700283899756
143	1	B	SHAM	SHAM	1	1	1	2	D	11	D11	1	1	2	2	3	4	17787	14157	5629	5168	0.31956079631669	56	5.66183066245958	0.0800197899732266	5.30322090327402	0.111368958649381	0.936467980810352	0.013036609382072	0.0128419727308625	0.790959872400148	0.0256998340439581	0.0256941781970791	0.936418529505737	0.012911469413321	0.0126933217838718	5.66194118176005	0.0802702951083984	0.993113111252341	0.0494644239476532	0.0490016658331652	-0.00691071283822306	0.0500098138153702	0.0491818880586756	0.243544521471492	0.0993281834423058	5.68078307482737	0.264263764055735	1.0034411800239
144	1	B	EMS	EMS	1	1	1	2	D	12	D12	1	1	2	2	3	4	17329	13093	5779	5085	0.173437919721762	56	5.66640190358754	0.0909673688453523	5.3227318732305	0.127553530104695	0.939383166204475	0.0131888290682893	0.0135836651358113	0.758234999713577	0.0319688171741239	0.0319579330809455	0.939081251773509	0.0129185225229801	0.0132818954330636	5.66632901253214	0.0907310489301396	1.00349318764341	0.0508459741203597	0.0523900181914757	0.00348710063470638	0.0508215079998234	0.0519944636432084	0.264367018308976	0.104008085534068	5.68517090559946	0.285086260893219	1.01403856721939
145	1	B	EMS	EMS	1	1	1	2	E	1	E01	2	1	2	2	4	1	18755	14500	6270	5561	0.137048517240774	56	5.66765650990302	0.088195230927583	5.33774071270108	0.132740084851569	0.941137234749258	0.0140372322946209	0.0146326597642978	0.722227554857194	0.0386243731442733	0.038605183161787	0.940971546325684	0.0138661595606045	0.0142327226479766	5.66772295628189	0.0881761973699135	1.01099440439429	0.055351613437517	0.0569696558772182	0.0109344052992725	0.0547075007303098	0.0560954910746586	0.279149127962755	0.111440322609806	5.68466749197291	0.294171327079683	1.01873190796254
146	1	B	EMS	EMS	1	1	1	2	E	2	E02	2	1	2	2	4	1	18502	15243	7435	6832	0.516473778266407	55	5.65886768697961	0.0854496585683995	5.34432544151666	0.123377940160706	0.943886996810069	0.0123601729740445	0.012735528546387	0.760083154069651	0.0324806750939465	0.0324692600102444	0.943568784767126	0.0121715246801246	0.0124010778317104	5.65888966028968	0.0855686797181972	1.02148349458528	0.0490830993637057	0.0507575230715615	0.0212559770022522	0.0483397185670843	0.0494609980243444	0.299459541650944	0.0972923032178992	5.6758341959807	0.314481740767872	1.02937975682156
148	1	B	SHAM	SHAM	1	1	1	2	E	4	E04	2	1	2	2	4	1	17627	13493	6022	5219	-0.00408727403557752	56	5.66081332160467	0.0894576339817398	5.30288913398486	0.120741737254028	0.936149249002687	0.0124453181348656	0.0128108470317311	0.800804363924861	0.0239090882155181	0.0239045339445542	0.935913327014777	0.0125187488629116	0.012626981445631	5.66090063740377	0.0895569886941565	0.991167960858798	0.0477756458511524	0.048595368850337	-0.00887127277840634	0.0485168528042672	0.0488454734485219	0.239593836211675	0.0988945349050177	5.67784517309479	0.254616035328602	0.998605379318593
149	1	B	EMS	EMS	1	1	1	2	E	5	E05	2	1	2	2	4	1	18835	15045	6614	6143	0.544874765245615	56	5.67108764226373	0.0741184599623439	5.32405804615135	0.121413755462823	0.938957129100288	0.0142383129797204	0.01415893873756	0.56288583093832	0.0663137870343071	0.066216837343729	0.938827401249422	0.0128713415594296	0.0133699010061759	5.67084342107248	0.0743236668811904	1.00249425671958	0.0509270682889398	0.052757966519665	0.00249115122414887	0.0507374333042732	0.052341521948636	0.262381906370512	0.104946684858367	5.6877879567635	0.27740410548744	1.01010310545711
150	1	B	EMS	EMS	1	1	1	2	E	6	E06	2	1	2	2	4	1	17694	13148	5867	4993	-0.0673624741926706	56	5.67066046201228	0.0946948393111295	5.31899148210346	0.128753484400322	0.937282542243679	0.0132830712173796	0.0134449618627549	0.814031780217194	0.0217348160504655	0.0217313944950385	0.937043508443819	0.0131386151283323	0.0132708489959266	5.67065493228752	0.0945926672731486	0.995530087399067	0.0508964142340411	0.0513930287697762	-0.00447993253021698	0.0512344015287358	0.0514784473869232	0.248431858727033	0.103667665320874	5.68759946797854	0.263454057843961	1.00303352925905
151	NULL	B	NULL	NULL	1	1	1	2	E	7	E07	2	1	2	2	4	1	17082	13225	5600	5382	0.261979624862719	56	5.6585112628476	0.0879203042295641	2.87852179550121	0.197257925667236	0.508905562220302	0.0339117293629635	0.036338204745159	0.450313147184051	0.0103547403750797	0.0103543703182279	0.508670797957486	0.0339767228474601	0.0363297661823449	5.65851442993086	0.0880190818780824	0.517177325966584	0.00460254734290371	0.00467006062366095	-0.659369473017289	0.00889835998792139	0.0090205253146694	-3.10144415489796	0.268469090274814	5.67545896562188	-3.08642195578103	0.517440612019635
153	1	B	EMS	EMS	1	1	1	2	E	9	E09	2	1	2	2	4	1	17938	12901	5648	4797	-0.0893834155951687	56	5.66776945222166	0.0907531812589035	5.3067230335948	0.126285570392815	0.936115356051575	0.0129747435059022	0.0132748634593235	0.748395876421694	0.0331205214348122	0.0331084186718604	0.935824472057524	0.0127877147878905	0.0129333814470483	5.66758398039191	0.090876047116718	0.990826641976739	0.0489260307577726	0.0496934178768349	-0.00921569236960447	0.0495041377612427	0.0499815826641639	0.238898990151892	0.101199425138802	5.68452851608293	0.25392118926882	0.99825889437064
154	1	B	EMS	EMS	1	1	1	2	E	10	E10	2	1	2	2	4	1	16774	11809	5089	4188	-0.0787826201928232	56	5.66205672955071	0.09087665295879	5.29597481378836	0.118985151332863	0.934929072553006	0.0119095076881254	0.0128486455226719	0.788690883302263	0.025827750627703	0.0258220099294	0.934757477133907	0.0119395395849234	0.0126288313711494	5.66210819317716	0.0910139800580244	0.986746460153789	0.0456104249911865	0.0481975669548902	-0.0133421518253586	0.0460529382205865	0.048635321555555	0.230555086321188	0.0989755682815492	5.67905272886818	0.245577285438115	0.994116956549814
155	1	B	EMS	EMS	1	1	1	2	E	11	E11	2	1	2	2	4	1	18067	14723	7117	6419	0.643348292945643	56	5.66167736138238	0.0857283340999566	5.30961739387094	0.114986025552481	0.937303552571289	0.0112971471152426	0.0114255940035346	0.749061307147585	0.0332484939370941	0.0332362504041869	0.936917693275177	0.0111857705101113	0.0110538687145529	5.66170030575284	0.0857759709337349	0.995042573269158	0.0433664326455163	0.0429968005081316	-0.00496975553370637	0.0435938463873043	0.043022079653409	0.247447983691872	0.0868165526086495	5.67864484144386	0.2624701828088	1.00253863631053
156	1	B	EMS	EMS	1	1	1	2	E	12	E12	2	1	2	2	4	1	18676	14617	6485	5736	0.109379712736912	56	5.66923643098336	0.09253726760027	5.32215517985878	0.129088243321898	0.938246159985429	0.0139256974072158	0.0142117790367178	0.752654575605312	0.0327366104129697	0.0327249234748925	0.937944150382171	0.0137431018074791	0.0138800126043168	5.66929356742594	0.0926459366464429	0.999033975889812	0.0538178232993074	0.0543487040339898	-0.000966491045020013	0.0538098339613268	0.0541244584547431	0.255474881796992	0.108860306218754	5.68623810311696	0.270497080913919	1.00659045120262
160	1	B	EMS	EMS	1	1	1	2	F	4	F04	2	1	2	2	4	2	17898	13948	6338	5320	-0.0493983057694951	56	5.67377634612836	0.0906902411063479	5.31775211817261	0.125802855714653	0.937286634269423	0.0133379320955753	0.013549106913628	0.820498670240674	0.0205838152412268	0.020580908904131	0.937123621720469	0.0132017269601917	0.0134008274535269	5.67381961682703	0.0908212600660136	0.995840764324441	0.0510632138917849	0.0517721706917229	-0.00416790957885931	0.0514476112209908	0.0519145782245339	0.249058345716923	0.104367047968793	5.68858788015266	0.260861441779843	1.00173048159216
161	1	B	EMS	EMS	1	1	1	2	F	5	F05	2	1	2	2	4	2	17344	13859	5610	5200	0.450395724575591	56	5.66177388991868	0.0774601828248701	5.30889720946963	0.116155710644401	0.937251992585604	0.0128221976720319	0.012794522972483	0.717844687528446	0.0387523962141678	0.0387330148941126	0.937081232494793	0.0127060111296795	0.0124670020257592	5.66185285410012	0.0774635650677041	0.995676355718266	0.0490010692753795	0.0485957919082344	-0.00433301827062389	0.0492630612891438	0.0485465790096025	0.248726860968225	0.0979962937654374	5.67662111742575	0.260529957031145	1.00156412095809
163	1	B	EMS	EMS	1	1	1	2	F	7	F07	2	1	2	2	4	2	17824	13864	4887	4549	0.327720860287709	56	5.68062736276882	0.0753613549172397	5.31063384496901	0.115000621021732	0.933547949617124	0.0128442225477099	0.0128170675349145	0.72577233988072	0.0365761730998548	0.0365598754446051	0.933525151739084	0.0128267440465561	0.0125304784038054	5.68067201656072	0.0756657411030796	0.982076227404588	0.0484741287485271	0.0475437385424072	-0.018086348992052	0.0493449461184825	0.0481294884753542	0.220918297652264	0.098578322097875	5.69544027988635	0.232721393715184	0.987802517947403
164	1	B	SHAM	SHAM	1	1	1	2	F	8	F08	2	1	2	2	4	2	18728	14939	5942	5458	0.320782187241091	56	5.66636351568264	0.0754028166352386	5.31736330637072	0.111205399663227	0.938003652120803	0.0127728217151273	0.012867170425036	0.730749759324493	0.0365761730998548	0.0365598754446081	0.93791350111795	0.0125472215996589	0.0125953306313771	5.66644647660675	0.0755086791188526	0.998914330953298	0.0492046930727027	0.0492956407503312	-0.00108625888132068	0.0490143510869991	0.0491347028853862	0.255235204594595	0.0987627025500255	5.68121473993238	0.267038300657515	1.00484054076202
165	1	B	EMS	EMS	1	1	1	2	F	9	F09	2	1	2	2	4	2	18094	12961	5670	4605	-0.161968190757265	56	5.66312776850675	0.0927128949944589	5.30594220984459	0.129224477027521	0.935613739062509	0.0128878589861154	0.0132993801884681	0.758918140784525	0.0312010615866035	0.0311909426870073	0.935162864823341	0.0127923919879295	0.0129696217602233	5.66328527023085	0.0927259536508032	0.988292651262044	0.0484571520484249	0.0496247640532087	-0.0117764193637123	0.0492330610643255	0.0500091701198339	0.233725219391043	0.101583827498114	5.67805353355648	0.245528315453963	0.994092749576059
166	1	B	EMS	EMS	1	1	1	2	F	10	F10	2	1	2	2	4	2	19334	14164	5833	4803	-0.131412228264472	56	5.67188527883055	0.0805408722080509	5.32432567676832	0.11128582808683	0.937932287437636	0.0124567760716559	0.0129804382727553	0.760963445540694	0.0312010615866035	0.0311909426870073	0.937610194266362	0.0123871016500256	0.0127326176851731	5.67194653047739	0.0806493188893368	0.997731861806815	0.0482006690654729	0.0495353934476096	-0.00227071431468695	0.0483461722324431	0.0495114772352013	0.252863343734725	0.0994787117264494	5.68671479380302	0.264666439797645	1.00364403212689
168	1	B	EMS	EMS	1	1	1	2	F	12	F12	2	1	2	2	4	2	18929	14528	6358	5703	0.265510666699546	56	5.66995065523861	0.0851120866342725	5.31336939390083	0.1277649374448	0.936796439082076	0.0138525738104952	0.0142490010276879	0.730137108322274	0.0364481709499296	0.0364320437122826	0.936581760267929	0.0138805497986181	0.0139107572261162	5.66999863154905	0.0852584666549337	0.993743233001812	0.0535444061957645	0.0540688586518812	-0.00627642259470591	0.0539647013200602	0.0540468795383317	0.244820986463449	0.109459759360672	5.68476689487468	0.256624082526369	0.99960804622253
169	1	B	EMS	EMS	1	1	1	2	G	1	G01	2	1	2	2	4	3	18984	14478	6185	5500	0.0333342311533209	57	5.68816878413443	0.0865475520481903	5.34461525848397	0.125615446595985	0.939081360117261	0.0138913596503994	0.0140223580971616	0.77834320393971	0.0282583309809452	0.0282508128435594	0.938814819099371	0.0139406344899055	0.0137968847070046	5.68813309730647	0.0866908117357283	1.00244479657654	0.0548554352801713	0.0542697168164552	0.00244181267342234	0.0547261580945048	0.0539342324605384	0.262283514909459	0.107964496222696	5.70292310184603	0.272084775620097	1.00739574713426
170	1	B	EMS	EMS	1	1	1	2	G	2	G02	2	1	2	2	4	3	21539	17218	7522	6869	0.839456095286165	55	5.64772029762542	0.0710885075053196	5.2549828788959	0.125294431824842	0.930388705590029	0.013191917577394	0.0139826725038857	0.379239088231499	0.0975879803378827	0.0972799482984111	0.930363598529953	0.011415233033503	0.0123112316803955	5.64767883433486	0.0712396312171116	0.97029849204838	0.0419369747608255	0.0461071293203764	-0.0301515310607376	0.0433104420899725	0.0469541702309432	0.196194941093931	0.0979926254452147	5.66246883887441	0.205996201804568	0.974932819174825
171	1	B	EMS	EMS	1	1	1	2	G	3	G03	2	1	2	2	4	3	18108	14075	6094	5391	0.168913719587671	56	5.66805680929321	0.085465646612822	5.32044125680905	0.122605726847173	0.938108596893328	0.0135689407469515	0.013847568633073	0.752555629328917	0.0327366104129695	0.0327249234748958	0.937810950041197	0.013384815751505	0.0135686581516617	5.66815442461016	0.0853349178927168	0.998514212360926	0.0523477535610581	0.0531162953324215	-0.00148689251607203	0.0523214481320684	0.0529159977549457	0.254433254558318	0.106502673273181	5.68294442914971	0.264234515268956	1.00342644882446
173	1	B	EMS	EMS	1	1	1	2	G	5	G05	2	1	2	2	4	3	15587	13166	5148	4903	0.236030465911629	55	5.61157462430094	0.0757308629603356	5.19255351554929	0.10284092187009	0.925237950138992	0.0108922168572826	0.0111140485912058	0.691250521430086	0.041697285409985	0.041673144737557	0.925195524773703	0.0105012558547178	0.0107222154028674	5.61153845479133	0.0759067753797162	0.951662006372347	0.0371487488955795	0.0381620511762288	-0.0495453425538987	0.0390786458634408	0.0398787577953203	0.155780587216702	0.0844517689047548	5.62632845933089	0.16558184792734	0.956112774357914
174	1	B	EMS	EMS	1	1	1	2	G	6	G06	2	1	2	2	4	3	17823	13816	5520	5070	0.487671647670444	57	5.67196801095821	0.078182450212838	5.32129284631396	0.118473764337948	0.937357496470284	0.0133435590770535	0.0132635642756332	0.703030747128234	0.0413131295679617	0.0412896495405831	0.937177434956344	0.0130893934846487	0.0129014181504995	5.6721181469851	0.0783252516128441	0.996049559509186	0.0506176066283881	0.0503046075710613	-0.00395826433421757	0.0510331243758304	0.0502353728400697	0.249479165473557	0.101365935058269	5.68690815152465	0.259280426184195	1.00093752049676
175	1	B	EMS	EMS	1	1	1	2	G	7	G07	2	1	2	2	4	3	18854	14503	6068	5567	0.149761752240975	57	5.68612661260542	0.0947936876962538	5.34352872214694	0.129391413942947	0.938257261736008	0.0144460370214452	0.0146338244109642	0.811034240819063	0.022374285622643	0.0223705531566479	0.938037309647337	0.0143964646142183	0.0144778060880525	5.68607713352748	0.0948949160114339	0.999397816152253	0.056624053287739	0.0567696923475821	-0.000602365233261979	0.0562994834072349	0.05647890279312	0.256203387427449	0.113626731346978	5.70086713806703	0.266004648138086	1.00431875562748
176	1	B	EMS	EMS	1	1	1	2	G	8	G08	2	1	2	2	4	3	14705	11442	4843	4362	0.22535407881619	56	5.66236631215177	0.0981960739095311	5.2767202333352	0.13448139402539	0.930719414015905	0.0131508563785577	0.013185500860703	0.717088260221182	0.0377282468172817	0.0377103610355209	0.930185129913812	0.0129448662331291	0.0126932175521494	5.66243575068397	0.0982455957802493	0.969642286571825	0.0471224055384905	0.047442495160941	-0.0308280526912425	0.0487595964842684	0.0483816204360901	0.194799317890926	0.100971531508091	5.67722575522353	0.204600578601564	0.974270150434991
178	1	B	EMS	EMS	1	1	1	2	G	10	G10	2	1	2	2	4	3	18445	14377	6187	5524	0.257011574911845	56	5.67986469636608	0.0861432469635123	5.33657179482723	0.122489293088982	0.938672842151937	0.0132291049050515	0.0133726921082997	0.759274686438701	0.0315849347305778	0.0315744378839817	0.938301936026725	0.0128332700012468	0.0130905279902912	5.68009424455443	0.086284522966191	1.00043278086639	0.0501555913462936	0.0517391143306792	0.000432687235201835	0.0503406748871215	0.0513092560803574	0.258272766624219	0.103343756346403	5.69488424909398	0.268074027334857	1.00536391417521
179	1	B	EMS	EMS	1	1	1	2	G	11	G11	2	1	2	2	4	3	16018	12326	5081	4520	0.122529028711407	57	5.6822971880103	0.088016769983812	5.31081328244587	0.122715485712346	0.933741576144146	0.0129735456336088	0.0132722589931031	0.802970475785742	0.0230137734848386	0.0230097118182763	0.933547810028577	0.0129022817783319	0.013116448918198	5.68234882726475	0.0880463236523343	0.982161691652903	0.0490289905001568	0.0499130676131926	-0.0179993287343644	0.0498467571717021	0.0504392439828088	0.221095485565571	0.103472609815717	5.69713883180431	0.230896746276208	0.986912864775172
180	1	B	SHAM	SHAM	1	1	1	2	G	12	G12	2	1	2	2	4	3	19432	14801	6359	5611	0.0137671644717448	56	5.67920342284239	0.0926128295536208	5.3229259990156	0.129556893440276	0.936222729233978	0.0143197824101056	0.0144711148348452	0.783729790371715	0.0268511140574607	0.0268446637879936	0.935916531074584	0.0143755440925106	0.0142486061049374	5.67948718585613	0.0926484752235485	0.991180273056547	0.0551528927509608	0.0550884757639193	-0.0088588509470258	0.0554868444298351	0.0552028413982715	0.239618891969967	0.112105593956683	5.69427719039569	0.249420152680605	0.996020274248827
181	1	B	EMS	EMS	1	1	1	2	H	1	H01	2	1	2	2	4	4	19361	14168	6023	5042	-0.211446686356617	57	5.685604264798	0.099237825161596	5.33934012022257	0.145763443623928	0.937937704781482	0.0160860253906017	0.0163621099748894	0.74817231866498	0.0333764675271934	0.0333640821365082	0.937602852606577	0.0160519277434837	0.0160087317116823	5.68574124057343	0.0996141886496013	0.997703274454732	0.0620912944409381	0.0627212155162761	-0.00229936707326101	0.0622959331502987	0.0623741356357446	0.25280593196519	0.125966173072391	5.69689953271209	0.26091062052546	1.0017551673873
183	1	B	EMS	EMS	1	1	1	2	H	3	H03	2	1	2	2	4	4	19154	14938	6526	5897	0.104833930661768	55	5.6587914712312	0.0904563594174487	5.30509974976566	0.134466646655775	0.936654411661074	0.0152633956450686	0.0152612401701455	0.740541839483896	0.0346562641818835	0.0346423994597499	0.936457920932354	0.0152703164713077	0.0149300688169229	5.65885882454228	0.0903507997628554	0.993265100804996	0.0589647189484324	0.0579115837117194	-0.00675768097486334	0.0593840866025188	0.0579251939618395	0.243852562449416	0.117352760482844	5.67001711668094	0.251957251009686	0.997280877564883
184	1	B	EMS	EMS	1	1	1	2	H	4	H04	2	1	2	2	4	4	18586	14539	6164	5602	0.208472433303575	55	5.66586838804754	0.0915479352269273	5.32509881805412	0.132579945122418	0.938612089012562	0.0142998941460313	0.0144761828326175	0.748055235122672	0.033632417987661	0.0336197456011623	0.938238953649888	0.0140636174704097	0.0141320158438239	5.66598222889068	0.0915604474258738	1.00018626180629	0.0551564486648847	0.0553164537220803	0.000186243521508123	0.0551619713265036	0.0550874526735278	0.257780247950874	0.110543568827706	5.67714052102934	0.265884936511143	1.00425836034752
185	1	B	EMS	EMS	1	1	1	2	H	5	H05	2	1	2	2	4	4	18800	14117	5851	5149	-0.0599742379288406	56	5.6849548187729	0.0890928918980244	5.36536441802148	0.134238728796671	0.94246516511778	0.0154366177929552	0.0154725287414937	0.756359014000278	0.0327366104129695	0.0327249234748958	0.942148868435823	0.0153222464666162	0.0151843925245281	5.68505861729013	0.0892235146611523	1.01572269550998	0.0615522527241638	0.0618474213993027	0.0156003744119013	0.0607826991146502	0.0603447694626648	0.288355790760306	0.119873161383596	5.69621690942879	0.296460479320575	1.01992122365193
186	1	B	SHAM	SHAM	1	1	1	2	H	6	H06	2	1	2	2	4	4	18811	14408	6234	5422	-0.0339574770794275	56	5.67126867244626	0.0966254008665762	5.3259997606331	0.137585474005734	0.938022922970554	0.0144694330216152	0.0150003837149953	0.767604153034203	0.0300494968197023	0.0300404570960929	0.937688848491996	0.0145251975319478	0.0146993688001247	5.67128956801761	0.0967002833709226	0.99803823327832	0.056192031767906	0.0573471515388342	-0.00196369360959732	0.056531376976158	0.0571851013746094	0.253478420453686	0.115095743385231	5.68244786015627	0.261583109013956	1.00209285197866
188	1	B	EMS	EMS	1	1	1	2	H	8	H08	2	1	2	2	4	4	19165	14534	6161	5451	0.0684842902591862	56	5.68151710769061	0.0857136728160196	5.33059029644121	0.12172816373034	0.93720942161552	0.0138825825430635	0.0138045398460357	0.807182934550652	0.0228858744240797	0.0228818800859461	0.937029947991435	0.0138125008935898	0.0136577052007276	5.68174262401137	0.0857553992453638	0.995477519698162	0.0534134904934063	0.0528148216958481	-0.00453273765334163	0.0537213277036584	0.0529363470178916	0.24832581594451	0.106546938869198	5.69290091615003	0.25643050450478	0.999511300283292
189	1	B	EMS	EMS	1	1	1	2	H	9	H09	2	1	2	2	4	4	19427	14155	6428	5397	-0.196753207696554	57	5.69536958603096	0.100580917652389	5.35461354109744	0.14292536264061	0.938508948161733	0.0152175521037937	0.0154139532752125	0.789953283863975	0.0260835863333823	0.0260776733940483	0.938189938393282	0.0150318191868921	0.0151691350782092	5.69544732476681	0.100572246435102	0.99999449206095	0.0589216344223253	0.0594351593613159	-5.50795421882762e-06	0.0586662302606241	0.0591271543756337	0.257396944725854	0.118819863516583	5.70660561690547	0.265501633286124	1.00406503005278
190	1	B	EMS	EMS	1	1	1	2	H	10	H10	2	1	2	2	4	4	20163	15359	6491	5702	-0.0274251648380299	56	5.67780945453163	0.0920168361153279	5.33085595999427	0.136016322589639	0.93754980952688	0.0150145774981114	0.0148658429595838	0.738598088164228	0.0350402251001682	0.0350258946567208	0.937404346052543	0.0146579699256477	0.0144982905162936	5.67781392908745	0.0921823259635805	0.996930940543143	0.0565341523436213	0.0568315415429056	-0.00307377884215335	0.0569946382237264	0.0565520985388179	0.251253610681439	0.114314960365035	5.68897222122611	0.259358299241709	1.00097654851547
191	1	B	EMS	EMS	1	1	1	2	H	11	H11	2	1	2	2	4	4	17811	13343	5924	5132	-0.119681096240373	56	5.66179470775018	0.107958732788345	5.30505779881403	0.144989093656945	0.935622956268688	0.0147519515656712	0.0149845066682393	0.81184078883447	0.0218627085268172	0.0218592262273708	0.935393132643727	0.014734316109766	0.014798884781408	5.66176866354735	0.108004243000469	0.989173102190272	0.0562971202862309	0.0571373334546982	-0.0108859351937962	0.0571786160579307	0.0572677463838409	0.235525914555657	0.116751926044047	5.67292695568601	0.243630603115926	0.993155579818526
194	NULL	C	NULL	NULL	1	1	1	3	A	2	A02	1	1	3	3	5	1	18631	13412	5641	5437	-0.0754350533656045	56	5.67337207339099	0.119667520908047	2.93500315145365	0.187982083887737	0.515967533334051	0.0308286253979988	0.033250661431112	0.510165635469695	0.00102265421504228	0.00102265385855657	0.515910055643449	0.0307405015664858	0.0332504633261321	5.67339120709167	0.119768624854025	0.518190490824123	0.00445344741956168	0.00469674209947471	-0.65741236141979	0.00859548504475714	0.00904439572023845	-3.04483313588168	0.255142398099096	5.67841853302925	-3.02079580985028	0.518638338504265
195	1	C	EMS	EMS	1	1	1	3	A	3	A03	1	1	3	3	5	1	17591	12542	5014	4499	0.0143018880028216	56	5.6939308612067	0.10965102399145	5.33668182768417	0.142387413859701	0.936001396705392	0.0144085640536427	0.0149959615792739	0.805690810036424	0.0228858744240796	0.022881880085951	0.935705609141574	0.0144526590451876	0.0147852827461634	5.69396762324984	0.109703873450489	0.990370424082928	0.0554112934705308	0.0575184019935927	-0.0096762400957145	0.0560153538233088	0.0574295845847232	0.237969481755799	0.117243741536553	5.69899494918742	0.262006807787192	1.00230572549064
196	1	C	EMS	EMS	1	1	1	3	A	4	A04	1	1	3	3	5	1	17249	12511	5101	4628	0.263197606623561	55	5.65257169813638	0.0861212458230127	5.29071113536168	0.126343533092796	0.935752909879725	0.014265682283317	0.0141646634697541	0.749260155409023	0.0329925500161611	0.0329805869395353	0.935649320245444	0.0136293259764009	0.0138986866011988	5.65262450966195	0.0862903810035671	0.990154525143189	0.0523146116311228	0.0539137587067492	-0.00989426220978609	0.0526142526844424	0.0539400548067058	0.237529303133018	0.109944532111286	5.65765183559953	0.261566629164412	1.00208457404247
197	1	C	EMS	EMS	1	1	1	3	A	5	A05	1	1	3	3	5	1	20257	13739	5619	4882	-0.243401451208473	56	5.69707059540239	0.106356876907158	5.33599717374862	0.148363881458625	0.934879305717407	0.0164043375013567	0.0162291611016359	0.76295627416753	0.0301774444727122	0.0301682888284122	0.934616830168064	0.016002284097828	0.0159022418145281	5.69714030025144	0.106016570612976	0.986211162265876	0.0609748705108709	0.0611821491636384	-0.0138847868433684	0.0616735695704172	0.0614046582897946	0.229455226776351	0.125778172435309	5.70216762618902	0.253492552807745	0.998045274859119
199	1	C	EMS	EMS	1	1	1	3	A	7	A07	1	1	3	3	5	1	18392	12494	4770	4157	-0.251977933152229	57	5.70618503969158	0.111952237916931	5.31582135899539	0.146219694987088	0.930444252100642	0.0138327372367607	0.0146997103977043	0.807151143993058	0.0216069242847841	0.0216035627627196	0.930136513316471	0.0138913073160923	0.0145047516198109	5.70613980164357	0.111756836411034	0.969463687265784	0.0503091481652306	0.0540191165982547	-0.0310122601161214	0.0523978866342634	0.055121975737506	0.19441913397298	0.115012226524841	5.71116712758115	0.218456460004373	0.980890358054396
200	1	C	EMS	EMS	1	1	1	3	A	8	A08	1	1	3	3	5	1	21294	14899	5869	5403	0.0361221942181982	56	5.67087178805911	0.0899735941994561	5.33175517135314	0.1328689946487	0.939354252317284	0.0144727507844154	0.0145747348823657	0.76024013702596	0.031584934730578	0.0315744378839782	0.938926937270704	0.0143480003164193	0.0142862772295672	5.67076178568825	0.0901589220772577	1.00288570606363	0.0561608358158696	0.0564303140662747	0.00288155040663846	0.0560453392505399	0.055945984166564	0.263160278386337	0.112164416407114	5.67578911162583	0.287197604417731	1.01512548615101
201	1	C	EMS	EMS	1	1	1	3	A	9	A09	1	1	3	3	5	1	18483	13056	5307	4663	-0.0802919612343684	56	5.6743687224813	0.103691751359478	5.31557783447421	0.143057967732328	0.936174291299505	0.0145823832230211	0.0151265729735796	0.78816640483922	0.0260835863333823	0.0260776733940483	0.935740318980653	0.0145482479006269	0.0148761744000015	5.67444703597672	0.103835320208686	0.990503603043571	0.0558245722850736	0.0574651587848447	-0.00954177524936899	0.0563988580577413	0.0575826092970575	0.238240912812261	0.117103422397603	5.6794743619143	0.262278238843654	1.00244214450246
202	1	C	SHAM	SHAM	1	1	1	3	A	10	A10	1	1	3	3	5	1	18787	13608	5821	5189	0.0477443459670526	56	5.68230124983989	0.104569591484785	5.32100778614853	0.137562568448775	0.935322258052919	0.0138962338068496	0.0141968123637284	0.807458082768937	0.0225021817151255	0.0224983848889707	0.935102001986384	0.0136785659523803	0.0140007252102752	5.68237237040851	0.104922775351678	0.98806020120086	0.0524123610432282	0.053864690429969	-0.0120116507010373	0.0530177769361514	0.054111950964345	0.233249271804621	0.110315614115912	5.68739969634609	0.257286597836015	0.999939298232682
204	1	C	EMS	EMS	1	1	1	3	A	12	A12	1	1	3	3	5	1	18338	13167	5919	4886	-0.261242657282418	56	5.67260531167603	0.125737688287201	5.26873705431571	0.151476209206045	0.927809204354654	0.0135947621302219	0.0139442577280351	0.840785702769055	0.0153410111940057	0.0153398078788613	0.92752575861653	0.0136291294789022	0.01381837538505	5.67247260332881	0.125932584929421	0.959971840665341	0.0491603990190786	0.0501281769453165	-0.0408513276081093	0.0509971184718956	0.0518257104369801	0.174003023654951	0.108929384070179	5.67749992926639	0.198040349686345	0.971167588577034
205	1	C	EMS	EMS	1	1	1	3	B	1	B01	1	1	3	3	5	2	19249	14161	6065	5404	0.0410024768329325	55	5.66183823148305	0.0931737704901195	5.31892167929151	0.14238098739502	0.938441631411755	0.0154937178869326	0.0157813470408017	0.724830401174841	0.0377282468172817	0.0377103610355209	0.938309998900202	0.0153046382455805	0.0153638768023018	5.66192558475782	0.0933317874783134	1.00046435499956	0.05975693907291	0.0608470526792892	0.000464244076480133	0.0597176930574131	0.0602059573654481	0.258335830839359	0.121528296768649	5.66942088606547	0.279824075589949	1.01133956234485
206	1	C	EMS	EMS	1	1	1	3	B	2	B02	1	1	3	3	5	2	17862	12687	5374	4753	0.0118882045417825	56	5.68266754057749	0.0973751885732198	5.32923918540774	0.135205972536175	0.937031651544807	0.0141812775698546	0.0141321978004245	0.804798399441248	0.0232695738681417	0.0232653752829228	0.936880431202062	0.013997417029346	0.0139442625168538	5.68297325428793	0.0974100506419619	0.994898280595382	0.0542002990636247	0.054549298048091	-0.00511477760684847	0.0542827355656557	0.054355610887357	0.247156594156796	0.110174759660303	5.69046855559558	0.268644838907386	1.00565258846484
207	1	C	SHAM	SHAM	1	1	1	3	B	3	B03	1	1	3	3	5	2	17598	12713	5352	4791	0.0491106666133803	56	5.67802097735521	0.103210851597542	5.32525081897579	0.13917934163559	0.936805967523037	0.0142205090241087	0.0144019635122864	0.80758570175882	0.022757976111671	0.0227540483536288	0.936738765864167	0.0140798121373768	0.0142142001163913	5.67796929779998	0.103335122847568	0.994350083090331	0.0540915100559061	0.0553781626917838	-0.00566593806417183	0.0546059538254156	0.0552769429016339	0.246048770745631	0.111972818441945	5.68546459910763	0.26753701549622	1.00509248368256
209	1	C	EMS	EMS	1	1	1	3	B	5	B05	1	1	3	3	5	2	16941	11106	4552	3829	-0.368842444511795	59	5.73605451016715	0.125752875031094	5.40770015479272	0.146967336639481	0.94035822954919	0.014683256926806	0.0149057757952199	0.85676183629993	0.014573849167766	0.0145728174848923	0.940078213093762	0.0147486810676747	0.0147916870167938	5.7361702001247	0.125830862842603	1.00743558799393	0.0584496264550212	0.0593368414441365	0.00740808028270658	0.058052029474758	0.0583460891098353	0.272163259132707	0.116884551169089	5.74366550143235	0.293651503883297	1.01846221595522
210	1	C	EMS	EMS	1	1	1	3	B	6	B06	1	1	3	3	5	2	17884	14113	5725	5408	0.433603650276366	54	5.63130828453061	0.0737390959813886	5.21179442984309	0.102338731905591	0.925443725957096	0.0103416898614084	0.0105423292433906	0.670439235379044	0.0452833476154302	0.0452524332426262	0.925453431506257	0.00994104377417871	0.0100621227821529	5.63144011005416	0.0739289010146008	0.952574292151387	0.0352506944929916	0.0357167144978202	-0.0485871783351581	0.036998746767241	0.0373804916129762	0.157797420142156	0.078881042902515	5.63893541136181	0.179285664892746	0.962409289992493
211	1	C	EMS	EMS	1	1	1	3	B	7	B07	1	1	3	3	5	2	18374	12762	5376	4795	-0.000678561799083877	56	5.6838644001137	0.100585365574772	5.33493000747571	0.138225244258585	0.937239615339123	0.0136163849490474	0.0140149856474624	0.787529892697475	0.0263394254512219	0.0263333368586977	0.937249801058747	0.0138999650774568	0.0137596821440195	5.68369402285807	0.100436424838569	0.996330477785587	0.0536969928536295	0.0538714685727651	-0.00367627142703694	0.0539545651234629	0.0536610156513609	0.250045067658478	0.108491899301759	5.69118932416572	0.271533312409068	1.00711589409467
212	1	C	EMS	EMS	1	1	1	3	B	8	B08	1	1	3	3	5	2	17952	12534	5307	4591	-0.0939183714074163	56	5.6719527608625	0.104381970374848	5.32306224826594	0.139491120264593	0.937838285143355	0.0137846269959579	0.0141927237796098	0.776107087145942	0.0285142004555094	0.0285064763082138	0.937495776059741	0.0136156851991763	0.0138845493697725	5.67178344734168	0.10450099914137	0.997286520212551	0.0527899478394491	0.0546794730047882	-0.00271716794706942	0.0531380706195822	0.0542919288360828	0.251968592980284	0.109907528288059	5.67927874864933	0.273456837730874	1.00809270250856
214	1	C	EMS	PETITE	1	1	1	3	B	10	B10	1	1	3	3	5	2	15057	12418	5738	5331	-0.159677435842581	53	5.57480882695412	0.124549394757676	5.13263425107737	0.13817755846633	0.919897742987023	0.0113517659347514	0.0116089813827011	0.74096433010928	0.0320967800747897	0.0320857648132745	0.919223398483737	0.0107810044967732	0.0109431457090432	5.57446526893497	0.124482995709424	0.931043503606033	0.0363609086507336	0.0373167667761118	-0.0714492749707519	0.0390162590883662	0.039788731349288	0.109078539864866	0.0865293598436046	5.58196057024262	0.130566784615456	0.940410835932719
215	1	C	EMS	EMS	1	1	1	3	B	11	B11	1	1	3	3	5	2	17722	13235	5699	5108	-0.13973754693049	55	5.65775790243204	0.125559826438668	5.29905053728273	0.143634395042937	0.935365539206175	0.0136828686544952	0.0137586192042335	0.864484213778214	0.0125281651584087	0.0125275097677346	0.935166689990346	0.0136925838520097	0.0136779164127227	5.65788428938249	0.125532888524144	0.988307264468698	0.0522410550607279	0.0530412662594679	-0.0117616332892603	0.0530671433217965	0.0530850660422895	0.233755132747604	0.108574292895743	5.66537959069014	0.255243377498194	0.99891841032897
216	1	C	EMS	EMS	1	1	1	3	B	12	B12	1	1	3	3	5	2	19185	12916	5662	4903	-0.101004649068395	55	5.67002772308338	0.101366367749605	5.32095178869375	0.147935356721856	0.937308387773515	0.0153207178799683	0.0155738272855797	0.716855325355869	0.0388804205524701	0.0388608466264336	0.937176707945765	0.014938397936513	0.0150549378682714	5.66998298723648	0.101514648467169	0.996046737641354	0.0577450962317684	0.0589290315066387	-0.00396109715577339	0.0582709295184055	0.0586580813747032	0.249473479273059	0.118745193237747	5.67747828854413	0.270961724023649	1.00682599089328
217	1	C	EMS	EMS	1	1	1	3	C	1	C01	1	1	3	3	5	3	23123	17004	7291	6868	0.183448252191533	55	5.64189877758089	0.0814898311158474	5.33108093613591	0.130749242857786	0.944143937935481	0.0160210791681382	0.0158414473242061	0.70961453814781	0.0415692321031381	0.041545313005234	0.944348896079823	0.0157336695020872	0.0154851011698218	5.64205320196532	0.0814775328341079	1.02467584670735	0.0643905268038415	0.064095336523756	0.0243763154587967	0.0630746745453069	0.0620193678793692	0.305560014217713	0.122111086218964	5.64852580425249	0.325944984878839	1.03548559267568
219	1	C	EMS	PETITE	1	1	1	3	C	3	C03	1	1	3	3	5	3	1363	955	519	452	-0.458726370943277	52	5.51279108916662	0.157459459764672	5.19430963248007	0.167957945470437	0.943837822250793	0.0153325060829646	0.0148641628536378	0.900849663226679	0.00779789372185567	0.0077977356717413	0.943764890099108	0.0152387747979862	0.0148221626580281	5.51290472730567	0.157739019709297	1.02228416536	0.061255881329461	0.0599441454487544	0.0220394988586073	0.0607537123773391	0.0587020805620272	0.300993095361181	0.114725199980058	5.51937732959284	0.321378066022307	1.0330446566523
221	1	C	EMS	EMS	1	1	1	3	C	5	C05	1	1	3	3	5	3	17342	12889	4707	4358	0.327790552028172	56	5.67860486513237	0.0758017654570147	5.33107485871122	0.117352200576655	0.938421849870951	0.0139263325486536	0.0141647369567981	0.690003745465497	0.043746326836506	0.0437184524547414	0.938446823644854	0.0137430968406438	0.0138143160569434	5.6786474687689	0.0760904448894547	1.0010003503042	0.0539583801659903	0.0545810903020181	0.000999850285704175	0.0538692195039452	0.0541042594134512	0.259405788249529	0.108896869432149	5.68512007105607	0.279790758910655	1.01132251923532
222	1	C	EMS	EMS	1	1	1	3	C	6	C06	1	1	3	3	5	3	18645	13786	6110	5518	0.498864998199188	55	5.64155739146271	0.0849776249934873	5.27217706809483	0.123194238787718	0.935108349741166	0.0136251765074209	0.0139660541555503	0.691201072579284	0.0432340327745285	0.043207125525434	0.934767129249579	0.013243140270824	0.0135275733086514	5.6416481050303	0.0847453682264071	0.9867832177091	0.0508596268038065	0.0521132830120463	-0.0133049014077688	0.0512245625342015	0.052324715893635	0.230630566534295	0.107008565351608	5.64812070731747	0.251015537195421	0.996812596691048
224	1	C	EMS	EMS	1	1	1	3	C	8	C08	1	1	3	3	5	3	17975	12524	4530	4157	0.18905796852517	56	5.6735820844066	0.0779063707531063	5.31343270859514	0.111596997606025	0.936700778027627	0.0126529357983288	0.0127736570994745	0.727730375805636	0.0368321809948481	0.0368155389092542	0.936698121039197	0.0124822480758765	0.0124760160314156	5.67352596417544	0.0779572215522529	0.994192913286656	0.0482505447011186	0.0484159947711412	-0.00582401340303869	0.0487765436520611	0.0484668801091861	0.245730928079854	0.0979266648637054	5.67999856646261	0.26611589874098	1.00437488874873
225	1	C	SHAM	SHAM	1	1	1	3	C	9	C09	1	1	3	3	5	3	14364	8624	3613	2845	-0.282438032375983	59	5.71801065030505	0.10436754556006	5.35171709115979	0.128607486935444	0.933957157040189	0.0122119025400139	0.0126460406216225	0.835270027119756	0.017258997220505	0.0172572838637084	0.933874956143331	0.0123298576370554	0.0125105937620068	5.71790875981618	0.104340980078564	0.983397335192594	0.0467072091969099	0.0473885790695611	-0.0167420337978878	0.0475501404798361	0.0480041307183099	0.223653769251127	0.0979881998585424	5.72438136210335	0.244038739912254	0.993356984757357
229	1	C	SHAM	SHAM	1	1	1	3	D	1	D01	1	1	3	3	5	4	19459	13680	5313	4742	-0.0827732251790803	56	5.67992958929531	0.0949464260511104	5.32667270539531	0.131636715576636	0.937132358405435	0.0142608317933069	0.0144976759502469	0.801330420797037	0.023909088215519	0.0239045339445495	0.936862194748702	0.0141858760226703	0.0143169408147133	5.67999414932007	0.094770549116738	0.994827677609858	0.0544306181031311	0.0559275502603576	-0.00518574518172763	0.055084178718472	0.0557474756973487	0.247013985142438	0.11297456466635	5.68914630301757	0.264521557777925	1.0035710368912
230	1	C	EMS	EMS	1	1	1	3	D	2	D02	1	1	3	3	5	4	19558	14926	6325	5746	0.0989968996836632	55	5.65710176694185	0.100834765567964	5.2763859673295	0.1397023711847	0.931739143289564	0.0139551687898863	0.0141806943286203	0.758126961183947	0.0306892449982333	0.0306796157577171	0.931407443777812	0.013659254041014	0.0138445424934365	5.65696676346576	0.101002786619733	0.974154975791306	0.0506218366827979	0.0519338271303854	-0.026184875312924	0.0519175012801636	0.0528330104948163	0.204357814548304	0.10947893077823	5.66611891716326	0.221865387183791	0.982533219425705
232	1	C	EMS	EMS	1	1	1	3	D	4	D04	1	1	3	3	5	4	18521	12733	4985	4446	0.0391324751348603	57	5.68035863282034	0.087781933046068	5.30845769385355	0.127142788055249	0.933836180598942	0.013959285136463	0.0139978127386149	0.739884128725	0.0341443321471487	0.0341310725304513	0.9337992706815	0.0134168119629079	0.0136738771516621	5.68048239612784	0.0878320742398143	0.983111187142357	0.051137377689756	0.05181791166725	-0.0170330552201687	0.0515645042076891	0.0524488481893183	0.223061908694571	0.107210430696797	5.68963454982534	0.240569481330059	0.991647612950053
234	1	C	EMS	EMS	1	1	1	3	D	6	D06	1	1	3	3	5	4	17441	11490	4615	4074	-0.0348110812985638	57	5.7044357952989	0.0846349435713649	5.32202588707755	0.122295403739833	0.933144689777138	0.0122761079049634	0.0127431296976352	0.691632725692922	0.0423375725051107	0.042312303399178	0.933068895257145	0.0120592453378014	0.0122487006012006	5.70437527723754	0.0844771594113494	0.980358504581214	0.0452392385338533	0.0461451041530271	-0.019836953746704	0.0461610454611185	0.0468764541125496	0.217350372676748	0.0960203431101543	5.71352743093504	0.234857945312236	0.988846313256861
236	1	C	EMS	EMS	1	1	1	3	D	8	D08	1	1	3	3	5	4	19036	13553	5796	5177	0.064767050595429	55	5.64835025144471	0.0918650655661022	5.28035069304601	0.128474211767767	0.934064486281778	0.0128543382854534	0.0130862418287284	0.747711008102192	0.0329925500161611	0.032980586939532	0.933784529249548	0.012576532570085	0.0127248199961554	5.64830510999527	0.0918586977346085	0.983055473126567	0.0477595751256034	0.048431941281961	-0.0170897279485183	0.048503406785497	0.0489453041364852	0.222946630642482	0.10021646420254	5.65745726369277	0.24045420327797	0.991590914928443
237	1	C	EMS	EMS	1	1	1	3	D	9	D09	1	1	3	3	5	4	19087	13618	5512	4955	0.271908070083616	56	5.67692852225286	0.0872263038365303	5.31624510189402	0.122724969286446	0.935982881040623	0.0128769670194905	0.0131575370876876	0.738515180005007	0.0347842500150507	0.0347702311920682	0.935807789623441	0.0126601965352594	0.0128118116353412	5.67679815794042	0.0870954137245538	0.990762586119281	0.0484227375483989	0.0496843378941689	-0.0092803433644443	0.0490236216896653	0.0497434681032914	0.238768533462154	0.101194134567834	5.68595031163792	0.256276106097642	0.999434148858375
239	1	C	EMS	DEAD	1	1	1	3	D	11	D11	1	1	3	3	5	4	7367	6462	3386	3239	-0.308200729963177	51	5.46228866173304	0.140062309019404	5.16959215126118	0.179903904144936	0.947441371682058	0.0142330489296394	0.013721265891369	0.755342433127256	0.0351682143605083	0.0351537263890453	0.946790909224891	0.0130960255218012	0.0129226216972805	5.46224482328344	0.139933538470938	1.03479582624167	0.0547122600407073	0.054636698055453	0.0342041379254545	0.0530196136129217	0.0523614468279923	0.324656565093318	0.102122063290402	5.47139697698094	0.342164137728806	1.04424509211291
240	1	C	EMS	EMS	1	1	1	3	D	12	D12	1	1	3	3	5	4	17251	10424	4229	3472	-0.602562469839647	58	5.73644787994292	0.152964474489948	5.4446005797288	0.191291531562633	0.946977462183681	0.0165590496168471	0.017655356621794	0.68353777310956	0.045923835549037	0.045891591904237	0.946221152529067	0.0152936092059308	0.0162320661678952	5.73665376302631	0.152837079978367	1.03241737584366	0.0640339482631744	0.0685611753726526	0.0319030192550242	0.0617043168152708	0.0655791937045434	0.320201065846438	0.128720698773448	5.74580591672381	0.337708638481926	1.04182463416971
241	1	C	EMS	EMS	1	1	1	3	E	1	E01	2	1	3	3	6	1	18758	13094	5221	4595	-0.0614575169108385	56	5.68260711486417	0.0963376646707301	5.33731746845325	0.142935913257615	0.938258799400105	0.014711020180916	0.0149528069417248	0.763136772893636	0.0308171976289539	0.0308074474900436	0.937775023746302	0.014733673932781	0.0146368344520599	5.68247529484987	0.0964679757545099	0.998374116394794	0.0573078807269023	0.0575693649383391	-0.00162720678837676	0.0574135234322904	0.0571856729540757	0.254152310813343	0.11546388949213	5.69369488589316	0.273749810756876	1.00824164559934
242	1	C	EMS	EMS	1	1	1	3	E	2	E02	2	1	3	3	6	1	18952	12941	5569	4727	-0.212666828898775	56	5.68722029736266	0.103581083702944	5.34322932416584	0.139595341500421	0.938174377975252	0.0141239226461223	0.0143418379639796	0.790558775774896	0.0259556680561169	0.0259498416617203	0.93801686799229	0.0138482816918199	0.0140746215216424	5.68714381805391	0.103569073823134	0.99931795707132	0.0536176523742674	0.0552312923267521	-0.000682275625770138	0.053918061449639	0.0549320778274328	0.256043533617331	0.110565237163133	5.6983634090972	0.275641033560865	1.00920416562996
244	1	C	EMS	EMS	1	1	1	3	E	4	E04	2	1	3	3	6	1	16696	11686	4951	4316	-0.024754679240774	55	5.65437197853531	0.104828989076246	5.27039231356621	0.14229537412661	0.931411049172184	0.0133500671013771	0.0133063406389537	0.734727960592715	0.0347842500150507	0.0347702311920714	0.930706061091721	0.012732738512988	0.0128183153855312	5.65443827810426	0.104977730329875	0.971560251202166	0.0468093843164989	0.047635057383592	-0.0288519934584288	0.048396179248603	0.0487042904034363	0.198872999913461	0.100969204983171	5.66565786914755	0.218470499856994	0.980897112789812
245	1	C	EMS	EMS	1	1	1	3	E	5	E05	2	1	3	3	6	1	17105	12554	4656	4236	0.334176261378051	56	5.67037343153487	0.079759148314674	5.31919873804042	0.115043978649753	0.937538949234856	0.0132616209280513	0.0132793652352483	0.754812616874585	0.0322247440255113	0.0322135965455922	0.937595403403299	0.0131366046657622	0.0130506638622835	5.67024188202377	0.0796832186680652	0.997674269987034	0.0508039528377855	0.0511192980708902	-0.00232843872364896	0.0509508435179522	0.0509233943906131	0.252747679136628	0.102671439219275	5.68146147306706	0.272345179080161	1.0075279486772
246	1	C	EMS	EMS	1	1	1	3	E	6	E06	2	1	3	3	6	1	16682	11536	4788	4283	0.150190562226611	56	5.66666771145859	0.0905259771790759	5.30535996925221	0.120606175172936	0.93594025060609	0.0123114339531087	0.0122794699471895	0.77725958519633	0.0280024652034725	0.0279951493789111	0.935738741997047	0.0122884965391288	0.0120181315366751	5.66662903150173	0.0905847689055736	0.990497551495874	0.0469411558783105	0.0461109087635385	-0.00954788483459887	0.0474607058803536	0.0464363119339503	0.238228580795249	0.0939667083571804	5.67784862254502	0.257826080738782	1.00020919724631
247	1	C	SHAM	SHAM	1	1	1	3	E	7	E07	2	1	3	3	6	1	17615	12599	5133	4576	0.24981729096853	56	5.67295866256097	0.0861608283633662	5.3201244599492	0.121794789696547	0.93734281411833	0.0127551444305393	0.01295898264097	0.737834987815083	0.0351682143605083	0.0351537263890421	0.936971310019362	0.012523712409687	0.0126039782481097	5.67283554964154	0.0862764374008418	0.995250271313965	0.0483261431295435	0.0490286144283298	-0.00476104458384301	0.0486158318808619	0.0490211478519214	0.247867267175826	0.0989541298302031	5.68405514068483	0.267464767119359	1.00505597715165
249	1	C	EMS	EMS	1	1	1	3	E	9	E09	2	1	3	3	6	1	17559	12232	5152	4535	0.0499209728930174	56	5.65829574257511	0.0930264973738726	5.28863817205272	0.132687013985842	0.934355692282349	0.0130156356730202	0.0135314903570287	0.750570426682341	0.0324806750939404	0.032469260010241	0.934039839104002	0.0128461969734164	0.0131818908530434	5.65828146720554	0.0932311987732337	0.984021303652815	0.0486668967230935	0.0500835120425566	-0.0161077321105687	0.0495644602815982	0.0506432944664006	0.224943154549243	0.103427230423252	5.66950105824883	0.244540654492777	0.993604779332108
250	1	C	EMS	EMS	1	1	1	3	E	10	E10	2	1	3	3	6	1	16169	10885	4352	3767	0.00424506337818231	56	5.66949818623613	0.0899645018756872	5.31213714212595	0.134423507413916	0.93671443851905	0.0134516928784434	0.0140505864204235	0.671991560295729	0.0466924707491733	0.0466585822981867	0.936223813018349	0.0131868745244316	0.0134323782558553	5.6697985630288	0.0903424138135833	0.992362495903099	0.0507019282518766	0.0519574578352147	-0.00766681918946403	0.0510906751290283	0.052064169427419	0.242021837787132	0.105480173536928	5.68101815407209	0.261619337730665	1.00211105037956
252	1	C	EMS	EMS	1	1	1	3	E	12	E12	2	1	3	3	6	1	19282	13371	5277	4678	-0.0651341227325624	56	5.67904067479423	0.0912748413137021	5.33068055641771	0.13356083595573	0.937031567241151	0.0148157504567922	0.0150965076066049	0.741670887524443	0.034400295913321	0.0343867359951026	0.936695160571591	0.0146771112858319	0.0147598771701464	5.67917799831416	0.0911810641247525	0.994181467384586	0.0569584629609795	0.0575933505628631	-0.0058355262281872	0.0569757033220107	0.0574280514345847	0.245707777218329	0.116491571354375	5.69039758935745	0.265305277161862	1.00396602074649
254	1	C	SHAM	SHAM	1	1	1	3	F	2	F02	2	1	3	3	6	2	17066	12494	4682	4292	0.176711847015129	55	5.65308365041639	0.082648660680055	5.29959008693917	0.125558488931673	0.937411785809719	0.0145205545625121	0.0148267838418054	0.703141327809123	0.0414411801571944	0.0414174812729051	0.937377023391231	0.014248221586469	0.0144678689041295	5.65319788769758	0.0829829093584077	0.996824729119923	0.0552751690384757	0.056764027242662	-0.00318032275188599	0.0556027671852314	0.0564492809794147	0.251039946729019	0.114203555928861	5.66224120637548	0.267418343618545	1.0050325211173
255	1	C	EMS	EMS	1	1	1	3	F	3	F03	2	1	3	3	6	2	18802	13915	5488	5004	0.215134053862688	56	5.66617293505099	0.0900513282746682	5.31811970604855	0.130684272023078	0.937389298439022	0.0134208857053369	0.0136839661309347	0.744646765716289	0.0340163519419655	0.0340032407981339	0.937117725315595	0.0133055255083981	0.0133459837434223	5.66611412868023	0.0902336414628112	0.995817891192842	0.0514996147447062	0.0522348620223846	-0.00419087828415088	0.0517000291265562	0.0520480651695556	0.249012234915904	0.105304638782851	5.67515744735813	0.265390631805429	1.00400905701567
256	1	C	EMS	EMS	1	1	1	3	F	4	F04	2	1	3	3	6	2	16416	11970	4590	4178	0.263813317005445	56	5.65771970036574	0.0796598405279471	5.30536856888218	0.113353234811553	0.936672218175485	0.013054498380333	0.0129276082423721	0.770279964872473	0.0294097732152152	0.0294012984344793	0.936370409271641	0.0129765106666709	0.0127331251596996	5.65757263635764	0.0795784703742558	0.992927507714174	0.0497655953332109	0.0493863033057279	-0.00709762201899309	0.0503680147833929	0.0494545971059684	0.243168225465557	0.10014553505712	5.66661595503554	0.259546622355083	1.00107094388862
257	1	C	EMS	EMS	1	1	1	3	F	5	F05	2	1	3	3	6	2	21924	16946	8072	7753	0.546187921271624	53	5.59615487972214	0.0811460891561581	5.23065835409277	0.121738099868088	0.933738856523053	0.0136493082574835	0.0134661221144065	0.663836825845525	0.0482299072271083	0.048192563086075	0.93382061550651	0.0132109928179428	0.012980541151281	5.5963516261592	0.0815173984191092	0.983191869509783	0.0498337505977788	0.0495502941360308	-0.016950990180917	0.0508095564217486	0.0500075066873218	0.223228825291354	0.102501655627277	5.6053949448371	0.23960722218088	0.991174538577833
259	1	C	EMS	EMS	1	1	1	3	F	7	F07	2	1	3	3	6	2	17656	12193	4934	4342	-0.099091932295627	56	5.67206366722863	0.0947492540087462	5.3204194524423	0.131601081379137	0.937133248300265	0.0135092692139633	0.013631831133887	0.784106424848922	0.0269790383939945	0.0269724955203151	0.936859417117867	0.0130271095643073	0.0133851700918804	5.67198877223495	0.095245045132125	0.994816924981795	0.0505253834875788	0.0521856763696251	-0.00519655386310451	0.0506639661801265	0.0520909362601426	0.246992264422297	0.105418208047265	5.68103209091285	0.263370661311822	1.00299156159123
260	1	C	EMS	EMS	1	1	1	3	F	8	F08	2	1	3	3	6	2	17886	12949	5106	4629	0.177555720253711	56	5.66564852184225	0.0893799753496903	5.31176657192775	0.122150016411443	0.936556911928913	0.0127795327685486	0.0126667687416709	0.765582118259114	0.0301774444727122	0.0301682888284232	0.936249458095859	0.0126813684488816	0.012383698120566	5.66552198536597	0.0896357384895108	0.992461290128282	0.0489512297497355	0.0478414299079925	-0.00756726957104475	0.0491565551856579	0.0480100906804137	0.242222382378131	0.0971046434522216	5.67456530404387	0.258600779267657	1.00059702753141
261	1	C	EMS	EMS	1	1	1	3	F	9	F09	2	1	3	3	6	2	17674	12946	5168	4828	0.225586198110161	56	5.66929130467509	0.0913143029418299	5.31356669422729	0.127537846692883	0.936496691271338	0.0134787058333606	0.0136886910053275	0.778467839796962	0.0278745336906679	0.0278673176465827	0.936332531018516	0.0134404301372461	0.0134505139024969	5.66919023241356	0.0915059890425412	0.992781453990831	0.052025231836369	0.0523261166903725	-0.00724472601738707	0.0523479803466647	0.05229700480071	0.242872013890944	0.106138322740239	5.67823355109146	0.259250410780469	1.00092247834245
262	1	C	EMS	EMS	1	1	1	3	F	10	F10	2	1	3	3	6	2	17521	12628	5178	4620	0.174436454588534	56	5.67874730179452	0.0885122136356194	5.33353895417786	0.122977369063149	0.938075904763841	0.0126400156066811	0.012910160466393	0.771791783726039	0.0292818313970857	0.029273466702153	0.93804231551492	0.0125396888148983	0.0126503113924612	5.67885121485346	0.0885321304844212	0.999417374713947	0.0488719805678817	0.0498942663263261	-0.000582795215368737	0.0490055916413731	0.0495401389028287	0.256242533877684	0.0998613913812124	5.68789453353136	0.27262093076721	1.00766797973717
264	1	C	EMS	EMS	1	1	1	3	F	12	F12	2	1	3	3	6	2	18200	12472	5808	4802	0.00440093311360368	55	5.65368997512305	0.0922641870537226	5.32105651851925	0.135810709457308	0.940603692761639	0.014809892081831	0.0153797455832219	0.675170328348283	0.0469486946722047	0.0469142457628318	0.940365990141752	0.014278684143909	0.0147677936513269	5.65357477141399	0.0923719672048738	1.00857930832688	0.0571731127440561	0.0591469985115489	0.00854271431611151	0.0565732015490779	0.0581958780898966	0.274413680105035	0.116248686403862	5.66261809009189	0.29079207699456	1.01698120672451
265	1	C	EMS	EMS	1	1	1	3	G	1	G01	2	1	3	3	6	3	18030	13037	5438	4851	0.0111038761060591	55	5.66958184025439	0.0951194513943632	5.33963029007408	0.140307517345157	0.941502454991898	0.0149730307013748	0.01512018848106	0.710904137761741	0.0406728968251052	0.04065049087897	0.940998212249061	0.0144242189329308	0.0146301594973986	5.66978975228146	0.0954977748900282	1.01110101737391	0.0576260822291489	0.0588454172770583	0.0110398533197402	0.0568332315688823	0.0577926053966949	0.279357655571825	0.115085563615786	5.67885481217328	0.293734217109068	1.01850511942895
266	1	C	EMS	EMS	1	1	1	3	G	2	G02	2	1	3	3	6	3	18578	13221	5179	4638	0.0811210663134734	56	5.6720904656263	0.087856337964787	5.32606126615967	0.132924726551121	0.937820046597548	0.0151378997142327	0.0154137417167513	0.678789084461418	0.045667635892956	0.0456359284395963	0.937563580856116	0.0148679079986766	0.0149207849370619	5.67205982388844	0.0880263913098859	0.997550384986144	0.0579487138270807	0.0587584769143783	-0.00245262084918114	0.0580184666110464	0.0583130748733163	0.25249882920124	0.118043851771832	5.68112488378026	0.266875390738483	1.00475826844606
267	1	C	EMS	EMS	1	1	1	3	G	3	G03	2	1	3	3	6	3	15836	11135	4506	3984	-0.0696442888697355	56	5.6806038039314	0.102946893909703	5.33053856348318	0.146775825251147	0.937144036600454	0.0134914122235804	0.0141857093801929	0.733004868536714	0.035936174235996	0.0359207167829828	0.936813894996982	0.0130841631353602	0.0136518541139006	5.68067825191216	0.103192731190584	0.994640732176334	0.0504550800863703	0.0535891853268333	-0.00537368026041056	0.0508750274136388	0.0532959393324072	0.246636280993191	0.10829192390715	5.68974331180398	0.261012842530434	1.00180648269586
269	1	C	EMS	EMS	1	1	1	3	G	5	G05	2	1	3	3	6	3	16204	11340	4736	4088	-0.053878821443119	56	5.67495799678068	0.0966112686885175	5.31792443740664	0.130107974515706	0.935804578566984	0.0136193646091924	0.0138888531944642	0.811008837493285	0.0219906017180204	0.0219870579596764	0.93544528276965	0.0136350913538288	0.0137085760492487	5.6749395976679	0.0964955139033746	0.989372723722917	0.0520761402595994	0.0528185030038417	-0.0106841492244817	0.0526915136828128	0.0530281468495571	0.23593372928947	0.107883011699744	5.68400465755972	0.250310290826713	0.996462191365873
270	1	C	EMS	EMS	1	1	1	3	G	6	G06	2	1	3	3	6	3	16743	11288	4774	4215	-0.0418231832251075	56	5.6808809854926	0.0886984451433072	5.34338298838571	0.118936610646743	0.939993794913033	0.0115588978260975	0.0120441585148315	0.748205009653684	0.0337603948664169	0.033747577333482	0.939731102858288	0.0114252326010309	0.0116493448249002	5.68078544693685	0.0886636877565762	1.00605948044779	0.0453469201665857	0.0461327754999506	0.00604119562331683	0.0449597564534643	0.0457318358206368	0.269448855942579	0.0911215551485677	5.68985050682867	0.283825417479822	1.01339057902487
271	1	C	EMS	EMS	1	1	1	3	G	7	G07	2	1	3	3	6	3	17889	12830	5284	4718	-0.0582335553602671	56	5.6795941318432	0.106609418632471	5.33315596714019	0.143820792914119	0.937554452264538	0.0145596863737343	0.0142475164624918	0.814835891889498	0.0216069242847841	0.0216035627627196	0.937292841779736	0.0142914579598395	0.0140553325177552	5.67975428484806	0.106606987374704	0.996497634266233	0.0551825442409575	0.0549750571122457	-0.00350851378942085	0.0555381043700019	0.0547819029576666	0.250381647906895	0.110677161292261	5.68881934473988	0.264758209444139	1.00369027347323
274	1	C	EMS	EMS	1	1	1	3	G	10	G10	2	1	3	3	6	3	17553	12883	5057	4612	0.20472759983863	56	5.68200691082755	0.0920368460777598	5.3399837963832	0.134114156732151	0.938660513933088	0.0140189329334966	0.0143261521267719	0.743197794819093	0.0344002959133196	0.0343867359951026	0.93850527317039	0.0136031700350226	0.0139748827218093	5.68223109732001	0.0921456632601138	1.00122949723591	0.0534238260024658	0.0551903955973285	0.00122874200812293	0.0532492910463881	0.0547275932643895	0.259862863786295	0.110062200035643	5.69129615721183	0.274239425323538	1.00849065571771
275	1	C	SHAM	SHAM	1	1	1	3	G	11	G11	2	1	3	3	6	3	18471	12674	4703	4196	0.0450102633271943	57	5.68195452222415	0.0824275218327997	5.33110119143795	0.128457810871884	0.937648058047357	0.0146806214875845	0.01478149163284	0.704363866890051	0.041057032442771	0.0410339860759356	0.937349845673791	0.0143494046665471	0.0143907156777685	5.68174281350599	0.0828279336772911	0.996719104593774	0.0562119045797969	0.0563402381588898	-0.00328628965928707	0.0560965903672416	0.0560964399255495	0.250827418144547	0.113375027473951	5.69080787339781	0.26520397968179	1.00391495078
276	1	C	EMS	EMS	1	1	1	3	G	12	G12	2	1	3	3	6	3	18753	12912	5358	4633	-0.204415898610427	57	5.69265836106969	0.110804315342192	5.34805161306836	0.148070656771104	0.938037587891646	0.0147849146905152	0.0150000106938867	0.774259387518466	0.0287700736607008	0.0287621397728588	0.937551012965823	0.0148878343020592	0.0146556550069805	5.69262640849657	0.11110922353089	0.997501465021784	0.0573698134957359	0.057471396307443	-0.00250166152567955	0.0578976685998328	0.0571733163928236	0.252400545768649	0.115469497253076	5.70169146838839	0.266777107305893	1.00470864010098
279	1	C	EMS	EMS	1	1	1	3	H	3	H03	2	1	3	3	6	4	19837	14416	6465	6061	0.356300892433803	56	5.68533501275492	0.0832990454310072	5.4092363416116	0.127513884435086	0.950870350090244	0.0144493484259485	0.014480369743516	0.675210238329745	0.0484861685621096	0.0484482265507222	0.950770055223749	0.0140968598638608	0.0139511613303736	5.68510078959036	0.0836491953709502	1.05170553598734	0.0609086753879524	0.0600153286516905	0.0504131663764715	0.0579236363215087	0.0569613156046917	0.355773499973059	0.108738518397899	5.69053413708129	0.368453489359935	1.05874847619862
280	1	C	EMS	PETITE	1	1	1	3	H	4	H04	2	1	3	3	6	4	1542	1079	600	533	-0.150400276335425	50	5.45222051300361	0.161370171056024	5.14557550994255	0.160820386415064	0.943343946938486	0.0163666215755128	0.020559120148236	0.901525119312644	0.007670054343199	0.00766990393943878	0.943031924265316	0.0169050491144745	0.0205307084401659	5.4522968953529	0.161631540326167	1.01929785244315	0.0690497849900381	0.0778053998612486	0.0191140102962071	0.0674276597379755	0.0784047919246189	0.295261290269363	0.149765258469986	5.45773024284383	0.307941279656239	1.02592724723615
281	1	C	SHAM	SHAM	1	1	1	3	H	5	H05	2	1	3	3	6	4	18399	13677	5531	4972	-0.0110090427517955	56	5.68344735837799	0.100771724189922	5.33443666046552	0.138026561199894	0.937309087214543	0.0144149150832704	0.014461479757245	0.790518426136678	0.025827750627703	0.0258220099294043	0.936945354507916	0.0143053521959547	0.0142178637100046	5.6834590192223	0.101068556760646	0.995149715292027	0.0552691378942978	0.0554121263101039	-0.00486208561101519	0.0556989684297716	0.0553126264849989	0.24766429502108	0.111860632139072	5.68889236671323	0.260344284407956	1.00147096243649
282	1	C	EMS	EMS	1	1	1	3	H	6	H06	2	1	3	3	6	4	18432	12918	5317	4726	-0.110149541568287	56	5.68023304768946	0.101884791413985	5.33322351087844	0.149609052668506	0.937446727603641	0.0158390568613124	0.016218316483924	0.726050027728964	0.0372162018881718	0.037199034106226	0.937175609223139	0.0157468748399345	0.0157442116454364	5.68037433028525	0.102042700474101	0.996042480838562	0.0607616425046353	0.0619985319188059	-0.00396537440987221	0.0612710145225662	0.0614990588818369	0.249464901547868	0.124931474600032	5.68580767777618	0.262144890934743	1.00237512031537
284	1	C	EMS	EMS	1	1	1	3	H	8	H08	2	1	3	3	6	4	18400	12424	5121	4446	-0.0969382586761935	57	5.68279648043879	0.0926070367822154	5.32863846949441	0.137374974398623	0.937223525872722	0.0149484156708689	0.0150173835031812	0.704632428861321	0.0409289858984078	0.0409061543436141	0.93699400905513	0.0145977179312446	0.0145215755276202	5.682874589916	0.0930473411060822	0.995338227883982	0.0563272420619343	0.056623455175463	-0.00467267212454907	0.0566914546719369	0.0564873531050388	0.24804477358703	0.114262462806517	5.68830793740693	0.260724762973906	1.0016618805851
285	1	C	EMS	EMS	1	1	1	3	H	9	H09	2	1	3	3	6	4	16459	11291	4793	4216	-0.0112416808366582	57	5.68562800070563	0.101652503567227	5.32987564550604	0.143255979645358	0.936367041803721	0.0144119419256781	0.014615997871712	0.784428921065208	0.0267231905991134	0.0267168320556725	0.936091213961667	0.0141328373311745	0.0143496268331541	5.68581077353408	0.101579274754773	0.991851991834301	0.0546217197030144	0.0555206880102783	-0.00818138465343693	0.0548811167866261	0.0556115338054995	0.240984912906025	0.112830915447397	5.69124412102501	0.2536649022929	0.998131157648738
286	1	C	EMS	EMS	1	1	1	3	H	10	H10	2	1	3	3	6	4	18786	13476	5662	5041	0.0366695944575013	55	5.66839523621408	0.100790362680874	5.31579617313502	0.144581197930346	0.936580487494396	0.0151867466293041	0.0150679862673526	0.787278213742078	0.0263394254512212	0.0263333368586893	0.936527971695746	0.0147681201323475	0.0148276067774349	5.66873770587747	0.101100699747635	0.993535503427454	0.0567454727101637	0.0578423397182727	-0.00648548191920503	0.057142513851028	0.0576877780780521	0.244400359650973	0.117148252519827	5.6741710533684	0.257080349037849	0.999836152064167
287	1	C	EMS	EMS	1	1	1	3	H	11	H11	2	1	3	3	6	4	17979	12281	4544	3814	-0.387814472918671	56	5.69474862100054	0.129921687834458	5.3239128205283	0.162754790237505	0.933905396684422	0.0163600091274372	0.0162115501914139	0.783180512839918	0.0264673463001817	0.0264611685910275	0.933697335421734	0.0159458472816179	0.0158853592639728	5.69466644439087	0.129947303361044	0.982726062650831	0.0606740873280562	0.0607862885986003	-0.0174248725009188	0.0616162861388638	0.0611606306491481	0.222264774652616	0.125866151383373	5.7000997918818	0.234944764039492	0.988888775026189
290	1	D	EMS	EMS	1	1	1	4	A	2	A02	1	1	4	4	7	1	18579	13776	6150	5669	0.0496812338782018	55	5.64063545003538	0.10073014219307	5.26561015928074	0.155064736188303	0.932476682099497	0.0159039604755824	0.0160257490678509	0.629343436736152	0.0537409744076696	0.0536893275759954	0.932186931756028	0.0152098362296779	0.0150639410721548	5.64093102642418	0.101126952761044	0.977055392794476	0.0567734981130039	0.0567030771119644	-0.0232119317251906	0.0582945903487402	0.0575569391648537	0.210453412956027	0.118806324928912	5.65436621589076	0.240537708178562	0.99163198508322
291	1	D	EMS	EMS	1	1	1	4	A	3	A03	1	1	4	4	7	1	18082	13015	5446	4799	-0.050171901029362	56	5.66619869421152	0.0965087547003832	5.30294750936927	0.13665251982721	0.935080563397956	0.0149328490814224	0.015084500354237	0.748138219577642	0.0329925500161672	0.0329805869395454	0.934843391541422	0.0146334669574814	0.0147354355587928	5.66629989690821	0.0967034884935702	0.98707373749956	0.0558875680043825	0.0566718581143799	-0.0130105336263854	0.0565355736386344	0.0569147660388256	0.231226937269167	0.116299690697254	5.67973508637479	0.261311232491701	1.00195630406137
292	1	D	EMS	EMS	1	1	1	4	A	4	A04	1	1	4	4	7	1	15062	9877	6139	5827	1.14106136002606	57	5.67802006584027	0.0835837610895394	5.57286463485344	0.10803473966457	0.981778287798746	0.00847153452636255	0.0084344485039161	0.807524138893289	0.0306892449982333	0.0306796157577026	0.981675859238992	0.0078455582028264	0.00809085839912134	5.67783734076595	0.0836382591829284	1.20259646419569	0.0431824534480328	0.0441650695902512	0.184482939485703	0.0358585685549921	0.0368282202855136	0.597456989652733	0.0628403124500413	5.69127253023253	0.627541284875268	1.22406139656454
293	1	D	EMS	EMS	1	1	1	4	A	5	A05	1	1	4	4	7	1	17831	12529	5007	4510	-0.0306099574428456	56	5.69029045772667	0.110626397276762	5.3300645734969	0.141767098033787	0.935375581515115	0.0141238448863824	0.0142675536590951	0.860449083960067	0.0131674293450711	0.0131666684293551	0.935061165642278	0.014014599944725	0.0141934612297681	5.69040432107149	0.110638124485813	0.987904299280293	0.053532606206393	0.054716444023312	-0.0121694490321294	0.0540593197850689	0.0549025003690583	0.232929931580235	0.112095807974065	5.70383951053807	0.26301422680277	1.00281223236168
295	1	D	EMS	EMS	1	1	1	4	A	7	A07	1	1	4	4	7	1	19599	13896	5860	5346	0.102228284152523	56	5.66311550523497	0.0933562566748909	5.30456375989049	0.141749686998618	0.935253986255673	0.0148668748540749	0.0150528498244644	0.723044465398393	0.037472221899962	0.0374546975708713	0.934836805742316	0.014409670335501	0.0146327721542418	5.66333533270152	0.0933662951835972	0.987048642281091	0.054864708249087	0.0564534409443018	-0.013035957865419	0.0557108920859342	0.0566106230587604	0.231175436552624	0.115857430418822	5.6767705221681	0.261259731775159	1.00193044239979
296	1	D	EMS	EMS	1	1	1	4	A	8	A08	1	1	4	4	7	1	20065	14589	5771	5429	0.18997979002021	56	5.67774287656924	0.0768291883815018	5.36890580155022	0.122701336932155	0.944713986021056	0.0147982721913393	0.0147519715917362	0.642498039136856	0.053228184765354	0.0531780006466975	0.944658937770956	0.0143752778597234	0.0142402755122075	5.67788854336834	0.0768020372820516	1.02595000961237	0.0593359061241344	0.0589830392577797	0.025619021986859	0.0576012013971912	0.0570897604683874	0.307984541267932	0.112099287082293	5.69132373283492	0.338068836490467	1.04201991195163
297	1	D	SHAM	SHAM	1	1	1	4	A	9	A09	1	1	4	4	7	1	18447	14421	5948	5596	0.410354577859565	56	5.6636067081235	0.0821805733578615	5.29857254937399	0.123231041316869	0.934762017630606	0.0141942652018443	0.014244741731358	0.697879740972926	0.0418253400819503	0.0418009764698866	0.934603406039456	0.0138544681760154	0.0138452971326298	5.66391105506335	0.0823715499097072	0.98616010128417	0.0527935499588383	0.0534336493378113	-0.0139365631124874	0.0533300403271486	0.0536055656881166	0.229350250175267	0.109860350028985	5.67734624452993	0.259434545397802	1.00101476411686
298	1	D	EMS	EMS	1	1	1	4	A	10	A10	1	1	4	4	7	1	16851	13054	6140	5633	0.22280824035867	55	5.64829071352399	0.0962678539575709	5.18916454086752	0.124010798293185	0.918302016201774	0.011433301025373	0.0116870835739898	0.791925546497667	0.022374285622643	0.0223705531566578	0.917912158980861	0.0112338798511269	0.0114681758058228	5.648228231375	0.0962868858942695	0.926643988877407	0.0373975918968484	0.0385579812089704	-0.0761858336994716	0.040391397907619	0.041367590281855	0.0988246426129241	0.0903289539263288	5.66166342084158	0.128908937835459	0.939680946314109
300	1	D	EMS	EMS	1	1	1	4	A	12	A12	1	1	4	4	7	1	18997	13760	5666	5186	0.134327370944398	56	5.68984850428492	0.0897320387676692	5.3152784886091	0.128535384472261	0.933211979525807	0.0145484998194463	0.0144418063484245	0.836466013309947	0.0170032587234972	0.0170016203990647	0.932964176914324	0.0143953521460342	0.0143530675013842	5.68973304116491	0.0896482518448788	0.979965121777163	0.0539208665620292	0.0543577194518748	-0.0202382980069431	0.0550270831312773	0.0550342802490175	0.216531472802668	0.113202102872467	5.70316823063149	0.246615768025203	0.994630581262685
301	1	D	EMS	EMS	1	1	1	4	B	1	B01	1	1	4	4	7	2	18103	14291	6440	5988	0.42025478160362	55	5.65198316927165	0.0915176736480767	5.30549969158733	0.141441803454518	0.937716208451916	0.0149781977756027	0.0152842104017195	0.69625353227022	0.0427217613623596	0.0426957985961504	0.937589618765681	0.014737375269572	0.0147642590839528	5.65187869269591	0.0915687425192475	0.997651747953406	0.0569946457538345	0.0583116497928082	-0.00235101353773081	0.0573800743046637	0.0577948552416439	0.25270244334515	0.117122340555532	5.66778185753257	0.280237657286881	1.01155117687454
302	1	D	SHAM	SHAM	1	1	1	4	B	2	B02	1	1	4	4	7	2	18075	12072	5062	4310	-0.228258135429506	56	5.68106521884994	0.0996270271959907	5.32190172986353	0.131861834110405	0.935581185960893	0.0134244905376749	0.0138869787700701	0.829540693913136	0.0186656001934131	0.0186634329192763	0.935194439346099	0.0132925594588317	0.0137499252987367	5.68115618099059	0.0994794209531885	0.988413285691857	0.0509850045068287	0.0523613439624235	-0.0116543633495167	0.0514377368011766	0.0528775235681641	0.233972132288395	0.107159251037302	5.69705934582725	0.261507346230126	1.00205479696495
303	1	D	EMS	EMS	1	1	1	4	B	3	B03	1	1	4	4	7	2	17600	12832	5039	4713	0.31904931952933	56	5.67563905191072	0.0897433561795469	5.30823990532071	0.126191998856842	0.934271668399312	0.0138806148442503	0.0140463139081143	0.807283299160835	0.022374285622643	0.0223705531566628	0.9342723500316	0.0137168075972748	0.0139047041731148	5.67563999513267	0.0899357840072673	0.984902565707595	0.0519287646996089	0.0531559425943329	-0.0152125607661174	0.0525950101286688	0.0535749191820441	0.226761390772538	0.109572682375249	5.69154315996933	0.254296604714269	0.998446065361906
305	1	D	EMS	EMS	1	1	1	4	B	5	B05	1	1	4	4	7	2	18179	13822	5180	4876	0.346295240221588	56	5.67703038939461	0.0779851859726188	5.31899043684417	0.116243985775149	0.93638216534353	0.0138019869911931	0.0136030554499974	0.753441314220202	0.032224744025518	0.0322135965455991	0.936423494682412	0.0135191178408908	0.0133924779182375	5.67727248845401	0.0781311620510488	0.99313226667843	0.0521347720689681	0.0520600711517574	-0.00689142483684188	0.0524425070347989	0.0520525961965068	0.24358334947266	0.105523586443695	5.69317565329067	0.271118563414391	1.00690552157321
306	1	D	EMS	EMS	1	1	1	4	B	6	B06	1	1	4	4	7	2	14657	10147	4085	3755	0.430982096952711	57	5.6798882953817	0.0799053096206027	5.33332835624765	0.112923656257186	0.938694119527335	0.0121424574284165	0.0125308741517711	0.740396513302594	0.0349122369864168	0.0348980629243969	0.938627210979718	0.0117291383083189	0.0122620553065185	5.67969331750634	0.0797318321670235	1.00170788238989	0.0460313801875568	0.0483953491741455	0.00170642561718821	0.0458974190521482	0.048035228579468	0.260816417798909	0.0964193472563724	5.69559648234299	0.28835163174064	1.01572054970767
307	1	D	EMS	EMS	1	1	1	4	B	7	B07	1	1	4	4	7	2	18031	12780	4726	4347	0.335025000599703	56	5.66841946604079	0.0763257625341333	5.30696943087723	0.112654410896072	0.935644840550893	0.0130978535691981	0.0131274705980341	0.681138062937566	0.044899072684734	0.0448689380456487	0.935337220037192	0.0127916566394063	0.0127332891436009	5.6685885051159	0.0766314998729204	0.988959169232491	0.0491438134086083	0.0490482511610594	-0.0111022331130942	0.0497280286624153	0.0492807367678511	0.235088677740371	0.100266880166244	5.68449166995256	0.262623891682102	1.00261592037937
308	1	D	EMS	EMS	1	1	1	4	B	8	B08	1	1	4	4	7	2	18053	12590	5382	4815	0.18739792347597	55	5.65585941822188	0.0891693461264643	5.27037833548683	0.124183834852293	0.931540274870468	0.0129472393627959	0.0132507946119406	0.70294846197063	0.0404168130776673	0.0403948274143245	0.931225845622233	0.0124148507905952	0.0127737838327288	5.65586198951377	0.0892615622366132	0.97348179786588	0.045709254556997	0.0476705010943452	-0.0268761519657644	0.0472328906949779	0.0486360969886587	0.202937716209105	0.100634449960725	5.67176515435043	0.230472930150836	0.986706454676311
310	1	D	EMS	EMS	1	1	1	4	B	10	B10	1	1	4	4	7	2	17075	12379	4855	4430	0.15566002750645	55	5.6792420531676	0.0901818029579036	5.342534201131	0.120759307074257	0.939428034753959	0.0127976864097163	0.0128225446556949	0.847219540246607	0.0162360564392431	0.0162346300051208	0.93926328646758	0.0126674098134456	0.0127375211586764	5.67928250833118	0.0901231282069141	1.00421074030857	0.0499464782359266	0.0504683465408894	0.00420189822887946	0.0497879666384485	0.0499946535398489	0.265790537037137	0.100050532249232	5.69518567316784	0.293325750978868	1.01829328194195
311	1	D	EMS	EMS	1	1	1	4	B	11	B11	1	1	4	4	7	2	17267	12896	4703	4390	0.282526389274693	55	5.65499283436344	0.075681805913889	5.29762265266332	0.109694499204229	0.936129409762458	0.0127382913630083	0.012742199254215	0.725672054762624	0.0372162018881718	0.037199034106223	0.93606918435934	0.0124628427485351	0.0124631327693918	5.65493021389709	0.0757806245651214	0.99176723015367	0.0479439692686667	0.0482241425632129	-0.00826684662573175	0.0485402251937254	0.0483509073609669	0.240812642673782	0.0980195271381378	5.67083337873374	0.268347856615513	1.00550237621605
312	1	D	EMS	EMS	1	1	1	4	B	12	B12	1	1	4	4	7	2	17821	13112	5433	5096	0.435750588993378	56	5.68468067533531	0.089501054483242	5.33296938838383	0.124751045707515	0.936710330353648	0.0128644475101588	0.0130381288367683	0.757887466848903	0.0314569759882241	0.0314466061516532	0.936570986047069	0.0127510056771055	0.0127432691944788	5.68472305239884	0.0896199463087115	0.993701616516105	0.0492127852762006	0.0495008883053038	-0.00631830206888198	0.0495171709688943	0.0495233353708026	0.244736732374685	0.10022057049048	5.7006262172355	0.272271946316416	1.00749076641234
313	1	D	EMS	EMS	1	1	1	4	C	1	C01	1	1	4	4	7	3	16347	11288	4553	4042	-0.0966832743087953	56	5.65731501288617	0.107603243103192	5.2856326834025	0.148598756961888	0.933368352046746	0.013835071015029	0.014205184963123	0.731514317371519	0.0356801829517088	0.0356650533183391	0.932806810068094	0.0135868422805965	0.0136852999148614	5.65741449328871	0.108000474931533	0.979374568394441	0.0513123703306608	0.0517590129807002	-0.0208411069762223	0.0521810459343458	0.0524457209405909	0.215300865115012	0.107922922852131	5.67229495910488	0.24173280496728	0.992220144596746
315	1	D	EMS	EMS	1	1	1	4	C	3	C03	1	1	4	4	7	3	15544	11394	4823	4440	0.475689297457712	56	5.66860067460059	0.0932087245861602	5.30589711945983	0.129438279296591	0.935738744740445	0.0136383885729436	0.0136209744156456	0.732030923223714	0.035936174235996	0.0359207167829828	0.935544412187931	0.0132294512118957	0.0132599079560361	5.66863014893642	0.0933827667108132	0.989752397452926	0.0505729962275815	0.0513957615977964	-0.0103004707332313	0.051084901916574	0.0514643779391362	0.236708921108944	0.104895683732777	5.68351061475259	0.263140860961212	1.00287593718331
316	1	D	SHAM	SHAM	1	1	1	4	C	4	C04	1	1	4	4	7	3	17017	12332	4981	4536	0.229906351973947	56	5.67439905415069	0.0873655842039672	5.31369958404937	0.124608519768308	0.936304552707	0.0130618849150007	0.0128665066790169	0.755626833399601	0.0318408553193377	0.0318301013486317	0.935952737102298	0.0126389756195316	0.0125658898014251	5.67443305850991	0.0876053021357719	0.991319422922466	0.0484880807056189	0.048644955182344	-0.00871847275370162	0.0490077293708266	0.0487578650879836	0.239902023240268	0.0989649416986853	5.68931352432609	0.266333963092536	1.00448493442996
317	1	D	EMS	EMS	1	1	1	4	C	5	C05	1	1	4	4	7	3	19931	14325	6944	6224	0.264842270586314	55	5.62945853093436	0.088149283490486	5.22692968850681	0.124548074476529	0.928021788877145	0.0119173405495906	0.012392991376519	0.686800464122227	0.0428498271067078	0.042823630328466	0.92747994015959	0.0112297566371936	0.0117317957824528	5.62959688685182	0.0884425196496847	0.959806984610758	0.04060896858789	0.0423539513305313	-0.0410230727443105	0.0422583880364583	0.0439348956909614	0.17364472445315	0.0920688414050962	5.64447735266799	0.200076664305418	0.972128455569681
321	1	D	EMS	EMS	1	1	1	4	C	9	C09	1	1	4	4	7	3	16502	12222	4741	4405	0.317274172885964	55	5.65488470198126	0.0787197309940001	5.29520852158927	0.112784557452826	0.93603094714019	0.011925947255434	0.0120782095335177	0.737882514267269	0.0350402251001682	0.0350258946567208	0.935749469637159	0.0118431976352667	0.0117814534746583	5.65501490331155	0.0789870241166283	0.990538719424568	0.0454238763262662	0.0453090973209611	-0.00950632282051157	0.0460005968647383	0.0455762286527176	0.238312470976428	0.0923249985015745	5.66989536912773	0.264744410828696	1.00368332028712
322	1	D	EMS	EMS	1	1	1	4	C	10	C10	1	1	4	4	7	3	16898	12474	4770	4399	0.355802134265158	55	5.66459779183538	0.0746729738806194	5.29398537022238	0.108569121786674	0.934411680760165	0.0120683674630845	0.0123242773740685	0.686606334361184	0.043746326836506	0.0437184524547388	0.934034287261732	0.011870764184302	0.0119210344673464	5.66476930086121	0.0746773419848996	0.984000280661599	0.0450914538706518	0.0455136655406415	-0.0161290967047225	0.0458800604759063	0.0459410252925	0.224899739124316	0.0939941421324197	5.67964976667739	0.251331678976583	0.996969753614795
323	1	D	EMS	EMS	1	1	1	4	C	11	C11	1	1	4	4	7	3	16854	12631	4765	4285	0.046551527874898	55	5.66742586701313	0.097387694246659	5.2534688556009	0.12107856092156	0.926077437901154	0.0114802118996012	0.0119917742403731	0.797823145391661	0.0226300785434156	0.0226262166213084	0.925537585028016	0.0113251958833511	0.0117804583144557	5.66755672186596	0.0976217662443492	0.952872363381205	0.0401567393411241	0.0423903390776888	-0.048274315691874	0.0422805859850615	0.0440400034002628	0.158455499537452	0.0935582806054181	5.68243718768213	0.18488743938972	0.965008094936252
326	1	D	EMS	EMS	1	1	1	4	D	2	D02	1	1	4	4	7	4	16937	11668	4658	4051	-0.140553125980194	56	5.68050593375722	0.0940274986655623	5.32747949823557	0.122055306835775	0.936690455768342	0.0135404113291524	0.0135227244383754	0.824122642664134	0.0198165118418868	0.0198139185101815	0.936244812943232	0.0133488179747121	0.0133864809341597	5.68043099412679	0.0938960863399782	0.992443393830775	0.0514927895978937	0.0520018276383161	-0.00758530197094041	0.0518392570812106	0.0520074122319533	0.242186057269221	0.105552914548822	5.6979910113533	0.26574059909585	1.0041855508134
327	1	D	EMS	EMS	1	1	1	4	D	3	D03	1	1	4	4	7	4	16384	11609	4818	4168	-0.040225710848842	56	5.67312047909889	0.0924498133245991	5.32172370526748	0.124080886986315	0.937085037549563	0.0119479748005274	0.0124257548504134	0.826114550279977	0.0195607492698996	0.0195582550455308	0.936751959831392	0.0120064465375875	0.012283147549231	5.67308316241435	0.0925671779573966	0.994401113803445	0.0463077470234097	0.0476610849005213	-0.00561461876692292	0.046595113138167	0.0477154987558824	0.246151947841477	0.0963591991027703	5.69064317964085	0.269706489668106	1.00618993135996
328	NULL	D	NULL	NULL	1	1	1	4	D	4	D04	1	1	4	4	7	4	16424	12210	4614	4419	0.30687958114025	56	5.6542121698973	0.0826289436656413	2.85430604180108	0.20365433276723	0.503984720887836	0.035171771596126	0.0365019671480276	0.36445837741821	0.0246765312791862	0.0246715243384872	0.50369571532146	0.0353150757964406	0.0364617206095149	5.65391905856295	0.0829022736622878	0.516513560423442	0.00459718786165997	0.00455681912620512	-0.660653736317053	0.00891690788186062	0.00881000962164999	-3.14034931762204	0.272351555984664	5.67147907578946	-3.11679477579542	0.516912338646718
331	1	D	EMS	EMS	1	1	1	4	D	7	D07	1	1	4	4	7	4	16969	12129	5008	4490	0.230431736518685	56	5.67176739120941	0.0844309194926593	5.30991215259945	0.120426570664722	0.935054484963616	0.0130794755001085	0.0132613306089036	0.780584525555878	0.0272348897183529	0.0272281589849686	0.934849715317458	0.0129694891937297	0.0130642974310659	5.67175573469209	0.0846453531232536	0.987097835732069	0.0494786191776232	0.050301639199628	-0.012986120171995	0.050121477071299	0.0505377979460391	0.231276389462604	0.10322188090742	5.6893157519186	0.254830931289233	0.998712585929206
332	1	D	EMS	EMS	1	1	1	4	D	8	D08	1	1	4	4	7	4	16974	12730	5748	5311	0.510712222791073	55	5.65216218224842	0.0877974807908096	5.29381539929306	0.123078763837667	0.936263011421207	0.0121019855743525	0.012392488204233	0.743273708520964	0.0341443321471487	0.0341310725304579	0.935654873338069	0.011769422083624	0.01200039087245	5.65214690203131	0.0878729700739438	0.990175819765709	0.0452357089785952	0.0461767466400302	-0.00987275589881645	0.0456243542787365	0.0464273823077267	0.237572727604483	0.0941626120948795	5.66970691925782	0.261127269431112	1.00186393106832
333	1	D	EMS	EMS	1	1	1	4	D	9	D09	1	1	4	4	7	4	16485	11992	5264	4752	0.131434226649162	56	5.68723546787352	0.0902992727299083	5.35059686342871	0.118351993737918	0.93987809094126	0.0113901503438285	0.0117242459650717	0.808993342128668	0.0230137734848404	0.0230097118182763	0.939312538051182	0.0112741172416237	0.0115348020298559	5.68713219357739	0.0905072043674652	1.00440505371946	0.0441533807145366	0.0459412236126408	0.0043953798647868	0.0442475547564919	0.0454125819390007	0.266175677783046	0.0910407067515079	5.70469221080389	0.289730219609675	1.01643230659056
335	1	D	EMS	EMS	1	1	1	4	D	11	D11	1	1	4	4	7	4	13892	11591	6710	6297	0.138607215559358	52	5.53183131896025	0.120539842118308	5.12866092985488	0.168448651978336	0.92711459530948	0.0129780836964066	0.0132169008582229	0.639756248023211	0.0519463321850315	0.0518996833234624	0.926787773547939	0.0115297310935808	0.0118696916164903	5.53241589604335	0.120476854385836	0.957323713624167	0.0413054454374613	0.0432679611578144	-0.0436136859753401	0.0432313338588732	0.0446644831041167	0.168231977900659	0.0945661921611653	5.54997591326986	0.191786519727288	0.968228823196594
336	1	D	SHAM	SHAM	1	1	1	4	D	12	D12	1	1	4	4	7	4	17055	12139	4616	4240	0.062050522615368	56	5.66526570751421	0.0819271035817114	5.31319206338329	0.111556632898543	0.936975555933099	0.0118267140729016	0.011924394300852	0.787755712168669	0.0263394254512212	0.0263333368586935	0.936856001051297	0.0115880205454249	0.0117465661811476	5.66523353710982	0.0819173399063598	0.994803701266237	0.044836418909836	0.0454061171787208	-0.005209846710583	0.0450179605180927	0.0455617113632863	0.24696555136396	0.0917255405628048	5.68279355433633	0.270520093190589	1.0066021141491
337	1	D	SHAM	SHAM	1	1	1	4	E	1	E01	2	1	4	4	8	1	17574	11910	4776	4133	-0.167609310183582	56	5.66716145749915	0.089970734644368	5.30347901287104	0.129360397572434	0.935031504078793	0.0140838212296272	0.0147840483854936	0.718317484606388	0.038240311502972	0.0382216879648122	0.934827876331695	0.013750114026654	0.0143630443294038	5.66728274194954	0.0900297078492824	0.987014618492133	0.0525457349114424	0.0552830933131354	-0.0130704286227424	0.053222878436904	0.0555016891681377	0.231105608277752	0.11346348942497	5.68970704573301	0.253506486905227	0.998052217754109
338	1	D	EMS	EMS	1	1	1	4	E	2	E02	2	1	4	4	8	1	16620	12831	6156	5694	0.533580678291549	55	5.65185926917789	0.0924105380083856	5.28179555380282	0.125798209112961	0.934457668598644	0.0119421435163381	0.0122620599954999	0.71977588239708	0.0379842766737522	0.0379660245001707	0.934096260608733	0.0115000559675633	0.0117520658097808	5.65177886424745	0.0921457399043577	0.98423500501744	0.0437940492872071	0.0448633300321571	-0.0158905842074488	0.0442646545916726	0.0452921605984928	0.225384370904428	0.0926061881771562	5.67420316803092	0.247785249531903	0.99520963585442
340	1	D	EMS	EMS	1	1	1	4	E	4	E04	2	1	4	4	8	1	16213	11807	4524	4150	0.332760415104675	56	5.66557817626726	0.0785998094795616	5.30604632704466	0.105930353449636	0.936443955615296	0.011437384911343	0.0116533677458727	0.798086492792953	0.0244207137414348	0.0244158608738471	0.936337494117824	0.0112195942201794	0.0115080227031177	5.66567845633736	0.0784349367604214	0.992800587906153	0.0432830849786149	0.0442722243652313	-0.00722545292719678	0.0436240976000416	0.0445329311003177	0.242910824381755	0.0897983181083752	5.68810276012083	0.265311703009231	1.00396926056535
341	1	D	EMS	EMS	1	1	1	4	E	5	E05	2	1	4	4	8	1	17447	13099	5637	5219	0.450536145752004	56	5.66564852184225	0.0847425947762438	5.31111359941284	0.122619234376917	0.936481194364588	0.0129537837002028	0.0132855206220492	0.688629882387309	0.043746326836506	0.0437184524547439	0.936126923705779	0.0126810003107061	0.012786321676995	5.66547577823222	0.0848535674104716	0.99198942158568	0.0489615651109663	0.0495239845860342	-0.00804283547823458	0.0493842603221452	0.0496107090415434	0.241264163042192	0.100616122230938	5.68790008201569	0.263665041669667	1.00313971835698
342	1	D	EMS	EMS	1	1	1	4	E	6	E06	2	1	4	4	8	1	17073	12947	4850	4583	0.523113654511141	56	5.66689314623883	0.0711698984811367	5.30824417674061	0.106824452326509	0.936459452874651	0.0123617572356026	0.0125901423097068	0.676213983952814	0.045923835549037	0.0458915919042395	0.936248290046581	0.0121267254651931	0.0121997322276916	5.66684665468678	0.071432595865909	0.992456789944272	0.0467844279347575	0.0472464176971869	-0.00757180394861457	0.047008557987692	0.047350649008494	0.242213248228915	0.0958978120003875	5.68927095847025	0.26461412685639	1.00361767432054
343	1	D	EMS	EMS	1	1	1	4	E	7	E07	2	1	4	4	8	1	19392	15103	7013	6557	0.511569632245954	55	5.65214186562261	0.0873417404343882	5.28724395269247	0.124674496568177	0.93478150402826	0.0121626938177478	0.0123247586780409	0.730218223496309	0.0361921702242018	0.0361763802476308	0.934401093300538	0.0119188510035821	0.0118812906976826	5.65203993101746	0.0875062031881094	0.985391217656902	0.0449148626085235	0.0452749889124068	-0.0147165413770789	0.0457470534295589	0.0457469201093905	0.227768163561699	0.0932334138002483	5.67446423480093	0.250169042189174	0.99639204094457
345	1	D	EMS	EMS	1	1	1	4	E	9	E09	2	1	4	4	8	1	16106	11502	4602	4172	0.110520460958817	55	5.65423961110637	0.0803010683901126	5.28081502737709	0.116460542911588	0.93366199705771	0.0123494776747853	0.0123761370892981	0.657336070280051	0.048870572487746	0.0488317217476877	0.933423349813986	0.0116447910815885	0.0117903512549221	5.65425441107857	0.0802267666670312	0.981692430099588	0.0436926440134825	0.0447467423960583	-0.018477227350211	0.0445640370615269	0.0453016753927394	0.220122206364377	0.0928528534715627	5.67667871486204	0.242523084991853	0.992609462302991
346	1	D	EMS	EMS	1	1	1	4	E	10	E10	2	1	4	4	8	1	17770	13232	5129	4712	0.30458042469464	55	5.65180407634683	0.0724274168234139	5.25596561313943	0.10206730928487	0.929280004010681	0.0106190248471961	0.01080617058683	0.73991946095633	0.0335044422093181	0.0334919138688358	0.929220424175632	0.0105064358935725	0.0105442371686641	5.65182292885932	0.0726942644516037	0.966110997087691	0.0383131879348249	0.0387385657186564	-0.0344765477125293	0.03968096425416	0.0398726900979307	0.187255314544304	0.0830713518031284	5.67424723264279	0.209656193171779	0.976675052769402
347	1	D	EMS	EMS	1	1	1	4	E	11	E11	2	1	4	4	8	1	15125	12756	5787	5332	-0.212258921209355	53	5.56485417814065	0.109663344766897	5.1478323947882	0.131465280715495	0.923747729168375	0.0109482051790487	0.0111915174011283	0.792832435035603	0.0235253772950639	0.0235210387475748	0.923156783864523	0.0106818965932803	0.0109026567251543	5.56478153303929	0.109753008205434	0.944514829035576	0.037097265960972	0.0384332858509341	-0.0570838917959103	0.0393217505438014	0.040339291064496	0.13983762674172	0.0864188528001382	5.58720583682276	0.162238505369196	0.954589652419134
348	1	D	EMS	EMS	1	1	1	4	E	12	E12	2	1	4	4	8	1	17213	11273	4455	3850	-0.145187400862971	56	5.67501031776372	0.0861658050325236	5.25832593432603	0.114043295681324	0.926259052735412	0.0117455900096501	0.0121145047331049	0.813800143570617	0.0198165118418868	0.0198139185101927	0.92602636611474	0.0115584803038256	0.0119932918882817	5.67498908954055	0.0861605822240118	0.954607510527832	0.0411753766089653	0.0429373202550015	-0.046455006843652	0.042960054637668	0.0447147398909213	0.162277769802948	0.0944039762225824	5.69741339332402	0.184678648430423	0.964910970109676
350	1	D	EMS	EMS	1	1	1	4	F	2	F02	2	1	4	4	8	2	16892	12556	5014	4653	0.209753637607343	56	5.67063821118224	0.0891128598977432	5.31953701547844	0.125821408426326	0.93696550116552	0.0133182487511665	0.013511133650818	0.796308488769841	0.0248044412564198	0.0247993560708148	0.9367046567969	0.0132138101921771	0.0133298330178742	5.67069182200066	0.0892047226247591	0.994218183090709	0.0511258421340482	0.0520806292071046	-0.00579859632092726	0.0513935793289911	0.0519398816940414	0.245782037726723	0.105333406648281	5.69093985341873	0.26496381330019	1.00379388957315
351	1	D	EMS	EMS	1	1	1	4	F	3	F03	2	1	4	4	8	2	918	580	260	210	-0.361546913158692	53	5.58047582528063	0.181203852731188	5.16019210538508	0.194214553313117	0.928676689894544	0.0153123183623208	0.0169542592223967	0.701702572417911	0.0406728968251052	0.04065049087897	0.927832205292417	0.0142281185313485	0.0157692795349625	5.58038744375017	0.181418841173046	0.961076088642388	0.049446748046368	0.0583960182732388	-0.0397017568478512	0.0523632673265331	0.0596795435888528	0.176399699033695	0.126591781117489	5.60063547516824	0.195581474607163	0.970009934574999
352	1	D	EMS	EMS	1	1	1	4	F	4	F04	2	1	4	4	8	2	16434	11620	4950	4365	0.0455392302717756	56	5.66135449505614	0.0898399150886571	5.28164004606397	0.118334903136655	0.933372324351488	0.0115529366074024	0.01174541513225	0.777013223573701	0.0276186733959743	0.0276116541819441	0.932945608556791	0.011497928983032	0.0114713758154759	5.66128240926076	0.0898498660938802	0.979895401992354	0.0427638307968148	0.0430361665053526	-0.0203094456747182	0.0438687446388833	0.0438279366781436	0.216386268048779	0.0896375354732737	5.68153044067883	0.235568043622247	0.98919372020758
353	1	D	EMS	EMS	1	1	1	4	F	5	F05	2	1	4	4	8	2	16906	12746	5339	4866	0.398840816070516	56	5.66176253199921	0.0825684848948444	5.30838937913936	0.11882766660133	0.937006133691844	0.0130134189711673	0.0132217619729681	0.692950408556391	0.0431059628085946	0.0430792937931159	0.936687704049715	0.0125973858651595	0.0127708323395772	5.66188490572484	0.0826611208086676	0.994152639788886	0.0490317006909335	0.049780664578613	-0.00586452295994937	0.0491466965593942	0.0497137875613464	0.245649467191266	0.100695061747218	5.68213293714291	0.264831242764734	1.00372707689893
355	1	D	SHAM	SHAM	1	1	1	4	F	7	F07	2	1	4	4	8	2	16829	12301	5025	4539	0.158680698134257	56	5.66167925431867	0.085181717855802	5.31217523998978	0.121367431396596	0.937787226439319	0.0130592942092432	0.0131193556859136	0.735052807876703	0.0358081780079598	0.0357928850506582	0.937501170716743	0.0129668149572619	0.0127629211760807	5.66178764040142	0.0852306449455221	0.997307508490824	0.0505360611492356	0.0499085309215048	-0.00269612278402183	0.0505888472114768	0.0497685107621226	0.252010779215897	0.100313546791707	5.68203567181949	0.271192554789365	1.00694304571519
356	1	D	EMS	EMS	1	1	1	4	F	8	F08	2	1	4	4	8	2	16239	11655	4761	4308	0.17816498781659	56	5.65659117691333	0.0849405006560064	5.30595938436901	0.108284569621463	0.93736837991726	0.0114527960730264	0.0117984494243459	0.815146842647717	0.0216069242847839	0.0216035627627196	0.937123533856279	0.0114569347632851	0.0116671710024438	5.65651006095351	0.0848928992391821	0.995840423104624	0.0444311447981242	0.0452328765797871	-0.00416825203432527	0.0446835476270047	0.0453213199625728	0.249057657854761	0.0911846071735156	5.67675809237158	0.268239433428228	1.00544754739226
357	1	D	EMS	EMS	1	1	1	4	F	9	F09	2	1	4	4	8	2	16047	10631	4502	3886	-0.166761118961942	55	5.65828524980852	0.100737842744585	5.28735376938455	0.139464207399538	0.934099387612131	0.0129390808053992	0.0133187949691388	0.715551666766795	0.0386243731442723	0.038605183161787	0.933395563909244	0.0121863666011093	0.0127066385982792	5.65804894394595	0.100987986736355	0.981587730181676	0.0455769745766091	0.048364701769655	-0.0185838860006571	0.0467044075660201	0.0488640491048847	0.219904922561435	0.100382200140959	5.67829697536402	0.239086698134903	0.990918823594734
358	1	D	EMS	EMS	1	1	1	4	F	10	F10	2	1	4	4	8	2	14923	12145	5234	4693	-0.163335137606122	54	5.58399745845884	0.102184888255257	5.1681850562794	0.126480554059296	0.925246886894178	0.011360101693337	0.0118486413506604	0.752449240863217	0.0309451512677895	0.0309352792223594	0.924849439074259	0.010905789666256	0.0114355267189617	5.58401803776608	0.102172382384252	0.950440696135765	0.0383496063151956	0.0408730584410489	-0.050829511282337	0.0403612282313316	0.0426077017061043	0.153074195901708	0.0906962953842367	5.60426606918415	0.172255971475176	0.959168567189734
360	1	D	EMS	EMS	1	1	1	4	F	12	F12	2	1	4	4	8	2	15614	11563	4713	4295	0.0902140188788039	56	5.66747256574627	0.0872403123744112	5.24056921538598	0.114543787793686	0.92480434721947	0.0120400759923433	0.0128020820555947	0.758125264357418	0.0294097732152152	0.029401298434468	0.924454868460393	0.0119399276293705	0.0125360331492605	5.6674166936355	0.0873995088161681	0.949052312719495	0.041983498971536	0.0445417786912718	-0.0522913578456511	0.0442208811895201	0.0465382472823132	0.149988652395475	0.0991425310799073	5.68766472505357	0.169170427968943	0.957753295052103
361	1	D	EMS	EMS	1	1	1	4	G	1	G01	2	1	4	4	8	3	17225	11789	4297	3801	0.00813521681707652	56	5.67512457565793	0.0807482299613594	5.31279914589611	0.124083988014277	0.935733700767821	0.0135755822770282	0.014718006535543	0.706363251600978	0.0404168130776673	0.0403948274143245	0.935524177946621	0.0133285612404399	0.0143543678404961	5.67525385838257	0.0811480051174773	0.989674874667902	0.0511819825837936	0.0556363268064154	-0.0103787992180486	0.0517836333781235	0.0556623625447505	0.236550689210834	0.113568393100291	5.69552363101457	0.253730629432019	0.998163913778188
362	1	D	EMS	EMS	1	1	1	4	G	2	G02	2	1	4	4	8	3	16335	10909	4631	3928	-0.213624698563803	56	5.68663045984591	0.098079417054106	5.33323359829016	0.13389319403027	0.936416334895923	0.0133719513218729	0.0140834126325622	0.752438434264531	0.0323527090305033	0.0323414282779222	0.935776710223407	0.0133190302919723	0.0136922584691233	5.68630721475244	0.09797833748544	0.990643272278904	0.0508166822137439	0.0535320146361952	-0.00940077690180619	0.0515391472628729	0.0533393144223486	0.238525492523875	0.109057358230044	5.70657698738444	0.255705432745061	0.999149092135633
363	1	D	EMS	EMS	1	1	1	4	G	3	G03	2	1	4	4	8	3	17406	13188	4912	4618	0.538804548908934	56	5.66660829283929	0.0730768954271832	5.32581931698482	0.114461180109708	0.939626428731069	0.0136210280878712	0.013344708291177	0.695361822409065	0.0431059628085946	0.0430792937931159	0.939493165968026	0.0133501564528239	0.0130028005056822	5.66650654760818	0.0731797579270075	1.00511834267829	0.052827046530354	0.0517657617016946	0.00510528848726518	0.0525824976199691	0.0511521953953579	0.267588188673576	0.102438267652775	5.68677632024018	0.284768128894761	1.01387499182596
365	1	D	EMS	EMS	1	1	1	4	G	5	G05	2	1	4	4	8	3	14255	8346	3793	2797	-0.754913259468865	59	5.76455494699753	0.177266997668577	5.48285929737109	0.190236766751832	0.949942022097673	0.0158500502295955	0.0169335059283305	0.751639626112367	0.0344002959133196	0.0343867359951059	0.949110716811212	0.0153559044155043	0.0159296277419448	5.76460649097662	0.177337077301894	1.04459002622962	0.0652244724853934	0.0684538172500229	0.0436244890418964	0.0628618265861828	0.0648935562744176	0.342797468095565	0.125647633325908	5.78487626360862	0.35997740831675	1.05403065508337
366	1	D	SHAM	SHAM	1	1	1	4	G	6	G06	2	1	4	4	8	3	16355	11458	4682	4183	0.109372927783217	56	5.68246638957313	0.0842910516554392	5.3250289645125	0.118359083882039	0.937044833017597	0.0119552712997095	0.0124150008605657	0.77937569353631	0.0277466030895664	0.0277394859142631	0.936866338500579	0.0118215499047203	0.0121882194753322	5.68249254401955	0.0845570803453891	0.994843719345119	0.0459484996079208	0.0472055168900756	-0.00516962014450278	0.0461499541868132	0.047306871152857	0.247046389184565	0.0953528249849572	5.70276231665155	0.26422632940575	1.00342232607819
367	1	D	EMS	EMS	1	1	1	4	G	7	G07	2	1	4	4	8	3	16741	12248	5065	4535	0.0864192595421009	55	5.67048613332496	0.0851694582171906	5.32360681822056	0.118772067447848	0.938216275768968	0.0120881554887966	0.0121777457089049	0.799013654508151	0.0245486221089116	0.0245436926061555	0.937979473153157	0.0120461673295708	0.0119851321845984	5.67072438034659	0.0852684153797969	0.999171900294924	0.0472741182107144	0.0471022470830231	-0.000828442769044209	0.0473451147787955	0.0468680199991402	0.255751105851562	0.0943196157287505	5.69099415297859	0.272931046072748	1.00782550732359
370	1	D	EMS	EMS	1	1	1	4	G	10	G10	2	1	4	4	8	3	1604	1005	724	534	1.68881281532861	48	5.3766188870982	0.118140195734879	5.0863788741079	0.158608380155019	0.944881899988624	0.0294046235820548	0.0281676794049752	1.03698944469461	-0.0171311276919783	-0.0171294521313786	0.9455452505686	0.0290125068430868	0.0281159870825379	5.37718747379353	0.118837895470855	1.0296095368191	0.117949917675028	0.114388581986048	0.0291796364619163	0.116313295356516	0.110737135414752	0.314915523268622	0.215897837698322	5.39745724642553	0.332095463489807	1.03879057829724
371	1	D	EMS	EMS	1	1	1	4	G	11	G11	2	1	4	4	8	3	1160	706	549	409	0.212527094830698	47	5.35683629376233	0.0870774937864559	5.15878150470838	0.163547016000119	0.964781517753569	0.0227370826897103	0.0236998599450158	0.667284461592378	0.0555359618713021	0.0554789718285273	0.96471050118381	0.0209531016334093	0.023285058601466	5.35677774873898	0.0876530071314469	1.11527514969369	0.100184089745144	0.103956466263626	0.109101145494848	0.0902105064777981	0.0961210064667449	0.464787833515616	0.168899516922126	5.37704752137098	0.481967773736801	1.12594063610663
372	1	D	EMS	EMS	1	1	1	4	G	12	G12	2	1	4	4	8	3	18139	12278	4996	4278	-0.0887739629755164	56	5.66722687409565	0.0831440090208059	5.30057374581917	0.119696086850139	0.934812788811487	0.0133222036287213	0.0139030819533272	0.716645231950895	0.0384963513385735	0.0384773514294615	0.934415094336134	0.013049047944845	0.0135218958795745	5.66724675903484	0.0834573356610533	0.985444389643319	0.049638505878483	0.0515417768961508	-0.0146625828737567	0.0504384396051699	0.052023679288581	0.227877653029159	0.106126800142106	5.68751653166684	0.245057593250345	0.993860121368579
373	1	D	EMS	EMS	1	1	1	4	H	1	H01	2	1	4	4	8	4	18542	13477	5353	5027	0.393532335453766	56	5.6772783704395	0.082727318423959	5.30016706437447	0.114946981382717	0.933007244883559	0.0127122091258561	0.0129984447237814	0.758775858049972	0.030689244998233	0.0306796157577063	0.932870404792144	0.0127297466135545	0.01276785824199	5.67730010907376	0.082626453258674	0.979613133441555	0.0478265814422081	0.0481290283079388	-0.0205975470508005	0.0489023886527781	0.0488721725860767	0.215798174360356	0.100304132863693	5.69393816930487	0.231281542431173	0.987100346860827
375	1	D	EMS	EMS	1	1	1	4	H	3	H03	2	1	4	4	8	4	16990	11866	5164	4558	0.00312379887726433	56	5.67643752892555	0.0911157627339072	5.31559043359467	0.122494425805913	0.935670645921225	0.0131182280223413	0.0129693382549655	0.800678241721717	0.0237811837991036	0.0237767022122218	0.93545896569849	0.0130749573250538	0.0127905715228871	5.67633667027961	0.0912305582282219	0.98942511268443	0.0498560723746039	0.0489731031993518	-0.0106311987831531	0.0505479302486746	0.0493497394447716	0.236040729228061	0.10001799133657	5.69297473051072	0.251524097298879	0.99706543081946
376	1	D	EMS	EMS	1	1	1	4	H	4	H04	2	1	4	4	8	4	17182	13643	5617	5309	0.102608780779713	54	5.59881676054781	0.0877520614963933	5.15456394737486	0.132483890025459	0.920717384571704	0.0127532470260667	0.0125437526375274	0.515638641448916	0.0723507770386744	0.0722249287629471	0.920312566563542	0.0112607952066819	0.0109756083173289	5.59893322860336	0.0882913634996593	0.934732372157064	0.0384009446426034	0.0379154416379085	-0.0674950236530279	0.040955977928177	0.0401857114101619	0.117595837853459	0.0871719148503915	5.61557128883447	0.133079205924276	0.941519272619149
377	1	D	EMS	EMS	1	1	1	4	H	5	H05	2	1	4	4	8	4	17026	12632	4876	4468	0.355410084359197	55	5.65386780328222	0.0862365910373784	5.29469984083205	0.130571798914878	0.935609362197525	0.0144931606341957	0.0146517536877554	0.660750527545584	0.0486143016100197	0.0485760582830433	0.935250873778892	0.013970594360169	0.0141290576153515	5.65390410820022	0.086337254492684	0.98862897717939	0.0535079981773072	0.0548492832220572	-0.0114361684470709	0.0540740214638868	0.0548481825156441	0.234413454773031	0.112201374470131	5.67054216843133	0.249896822843848	0.996256872530271
378	1	D	EMS	EMS	1	1	1	4	H	6	H06	2	1	4	4	8	4	17157	13165	5414	4993	0.21313283175898	56	5.66006917402588	0.0886513857962692	5.30935332291878	0.121316025211489	0.937117377709893	0.013140870787853	0.0130567950665737	0.808305658657007	0.022757976111671	0.0227540483536288	0.936983858335898	0.0130111029154513	0.0129048662684085	5.66000918127111	0.08867526190882	0.995298892750077	0.0501724374427484	0.0503545360392467	-0.00471219220930984	0.0504483660669801	0.0502656553505735	0.247965394685678	0.101620256459286	5.67664724150222	0.263448762756496	1.00303086450617
380	1	D	EMS	EMS	1	1	1	4	H	8	H08	2	1	4	4	8	4	16584	12569	7078	5634	-0.221632582594407	55	5.63167708881836	0.126635976861912	5.24552500510169	0.179903464436588	0.932678542497405	0.0168683877737584	0.0200206108254299	0.705064102284852	0.0404168130776672	0.0403948274143218	0.9323975027577	0.0163772747068807	0.019366060429636	5.63179936654129	0.126878387395027	0.977841949799486	0.0614677419139376	0.0704537539135285	-0.0224072275467935	0.0628465399667177	0.0723950779465797	0.212100078960846	0.147374360864611	5.6484374267724	0.227583447031663	0.985301525923432
382	1	D	EMS	EMS	1	1	1	4	H	10	H10	2	1	4	4	8	4	17859	12753	5288	4609	-0.0484874024942528	56	5.67812943397525	0.0934512175117225	5.32368926928338	0.129192892868299	0.936402548050605	0.0144388688663994	0.0147966418473651	0.780306541943043	0.0274907446057071	0.0274838224496191	0.936226523860527	0.014261402234078	0.0145626794212874	5.67807042403405	0.0934128214213652	0.992372938122949	0.0548059102632038	0.0564170477042579	-0.00765629665868157	0.0554491924974447	0.0564631287871711	0.242043036581938	0.114531273855099	5.69470848426516	0.257526404652755	1.00005925370301
383	1	D	SHAM	SHAM	1	1	1	4	H	11	H11	2	1	4	4	8	4	17758	13727	4932	4617	0.368000058349689	55	5.66410488568615	0.0752661665240727	5.30663944102426	0.120105021027313	0.936511581181885	0.0144688118509248	0.0142655171893667	0.690904075177754	0.0433621041560884	0.043334957257767	0.936499215674985	0.0140239984608902	0.0139140119789755	5.66413844568603	0.07540372381463	0.993424484524106	0.0537931834283612	0.0540632611576572	-0.00659722941702708	0.0541851421455911	0.0540538700567936	0.244175487473451	0.109519099163639	5.68077650591714	0.259658855544269	1.00112720828328
386	2	A	EMS	EMS	1	1	1	5	A	2	A02	1	2	1	5	9	1	18487	14582	6141	5605	0.379887716196333	55	5.65213219070482	0.0797523394059824	5.27092560363877	0.118649943012398	0.931940029233315	0.0137067995714622	0.0139451925723349	0.684680007095605	0.043746326836506	0.0437184524547414	0.931630825891632	0.0135118323648433	0.0135409845707702	5.65206121996148	0.0797531735418849	0.974984357498386	0.0500449052086704	0.0507804046682377	-0.0253338517043888	0.0514787066141756	0.051675432760391	0.206104663256055	0.106860629920507	5.67391404184644	0.244174467616611	0.993423981079876
387	2	A	EMS	EMS	1	1	1	5	A	3	A03	1	2	1	5	9	1	18156	14014	6574	5769	-0.0132946776635938	56	5.66183633927665	0.0927696277178996	5.29369836765167	0.128061707681638	0.934363459002953	0.0131538905687105	0.0138671499520155	0.771472010467132	0.0287700736607008	0.0287621397728549	0.933909695066313	0.013133197628015	0.0135955365228156	5.66185967912698	0.0929028337713453	0.983528731204935	0.049837301792211	0.0514887270712753	-0.0166084283566045	0.0506054050801865	0.0521349276579428	0.223925427743809	0.106437402611762	5.68371250101194	0.261995232104365	1.00229990847107
388	2	A	SHAM	SHAM	1	1	1	5	A	4	A04	1	2	1	5	9	1	17384	13349	5728	5128	0.230240779050076	56	5.66036451740246	0.0859370431702016	5.28709262450488	0.123024625635281	0.933938057593583	0.0135286662060245	0.0140379773358297	0.727628124024381	0.0364481709499299	0.0364320437122857	0.933562180131963	0.0133303540230352	0.0137011388430375	5.66041609498315	0.0861354681013382	0.982215903042931	0.0500684384810047	0.0519225388792949	-0.0179441349168924	0.0510797476380283	0.0525530649187908	0.221207862526129	0.107626261916431	5.68226891686811	0.259277666886685	1.00093613766196
389	2	A	EMS	EMS	1	1	1	5	A	5	A05	1	2	1	5	9	1	22792	18579	9006	8358	0.113345825125944	53	5.58227079594125	0.087747637540216	5.17072803803515	0.123391334758991	0.926382110023171	0.0109299664036882	0.011461689076415	0.655719187251822	0.0484861685621095	0.0484482265507222	0.926144018662518	0.0103317735565261	0.0107223832277134	5.58219289426644	0.0877671190638277	0.955026161871671	0.036528861388519	0.0385518914994296	-0.0460165442592848	0.0384015806627548	0.0400826384403227	0.163197812621986	0.0846840211546012	5.6040457161514	0.201267616982542	0.972691332751759
391	2	A	EMS	EMS	1	1	1	5	A	7	A07	1	2	1	5	9	1	18079	13741	5648	5138	0.274282359271658	56	5.6735825448433	0.0799581677902932	5.29518540619146	0.118367407611915	0.933171700408598	0.0132851494570889	0.013607627022739	0.680613245804918	0.0445148109871478	0.0444854428486751	0.932917166266728	0.0128477206422536	0.0131809000509616	5.67371762998299	0.0801852411645206	0.979788627660415	0.0482953122966959	0.0497339875112955	-0.0204184166431591	0.0493350158205271	0.0504614877813374	0.216163849251582	0.103611080917842	5.69557045186795	0.254233653612138	0.998414674908394
392	2	A	EMS	EMS	1	1	1	5	A	8	A08	1	2	1	5	9	1	15592	11809	5501	5000	0.180066986305312	56	5.67622843688975	0.0874799482727035	5.22717557582697	0.125689970182495	0.920740283771147	0.0126802247133771	0.0128969367705558	0.650612651032501	0.0475892814642711	0.0475534044244578	0.920374131245916	0.0117602981090127	0.0122577237237823	5.67633581225538	0.0875226772052133	0.934941823311802	0.0398536161787608	0.0422434434832014	-0.0672709727099881	0.0428520034230174	0.0447850675190199	0.118077273983374	0.0970757365716438	5.69818863414034	0.15614707834393	0.951827646672481
393	2	A	EMS	EMS	1	1	1	5	A	9	A09	1	2	1	5	9	1	18471	14176	6085	5413	0.204815819024012	56	5.66139427454668	0.0841119698448845	5.29138661264385	0.123657306131779	0.934642704981058	0.0133660303642846	0.0138080088813852	0.693502992558513	0.0425936970167748	0.0425679668638249	0.934331158886996	0.0130019986881852	0.0133498345824453	5.66143773244642	0.0839613825883877	0.985125716822282	0.0496122480986463	0.0511045053010655	-0.0149860146625714	0.0502675842846579	0.0514738649159129	0.227221276216355	0.105295529438574	5.68329055433138	0.265291080576911	1.00395886310849
394	2	A	EMS	EMS	1	1	1	5	A	10	A10	1	2	1	5	9	1	18385	14013	6022	5405	0.176573421824596	55	5.65030752313194	0.0865701315740453	5.28129477476602	0.121097952111242	0.934356514557702	0.0127473665771097	0.013110920596027	0.741430537754359	0.0341443321471475	0.0341310725304513	0.934057355974787	0.0124333874333159	0.012784659878365	5.65031271689276	0.086742924757301	0.984087640234578	0.0472802719828104	0.0485426829807067	-0.0160403206169172	0.0479660243138318	0.0491110189285398	0.22508013653675	0.100231540556667	5.67216553877772	0.263149940897306	1.00288050526327
396	2	A	EMS	EMS	1	1	1	5	A	12	A12	1	2	1	5	9	1	19252	14899	6387	5779	0.406031822229527	55	5.65407638259947	0.0811165518514544	5.26747210933015	0.127020920123964	0.931613166376216	0.0139753029724486	0.0142575513972763	0.60528209608804	0.0577160703545617	0.0576521112780366	0.931446402221985	0.0131970136408619	0.0135186517432622	5.65408821429688	0.0812223355831778	0.974299517854219	0.0490730392612336	0.0503943198438337	-0.026036509414744	0.0504194917023985	0.0514313396993578	0.204662469549084	0.106201217924957	5.67594103618184	0.24273227390964	0.992712567093901
397	2	A	EMS	EMS	1	1	1	5	B	1	B01	1	2	1	5	9	2	12577	8624	3419	2602	-0.541940565288152	58	5.74335020500683	0.130414229274501	5.39151642516753	0.149292735213228	0.938228703325248	0.0135603151912179	0.014378924931245	0.74065575673918	0.034400295913321	0.0343867359951059	0.937484585526755	0.0137557214865617	0.0137198513355786	5.74314548477566	0.130388354909813	0.997242995419052	0.0539529599979573	0.0531011935375228	-0.00276081707479878	0.053812526855136	0.0531788487321473	0.251881102895319	0.106744473637234	5.76746628203069	0.287401825975071	1.01523074111208
398	2	A	EMS	EMS	1	1	1	5	B	2	B02	1	2	1	5	9	2	17930	13634	4970	4695	0.533817483916138	57	5.68598791826416	0.0672959516655279	5.31237625670148	0.104543912196027	0.934268259603134	0.0125147041718751	0.0130449222302	0.65784792799371	0.0486143016100201	0.0485760582830456	0.934296981082753	0.0120108488238252	0.0126847247177701	5.68622115611126	0.0671905613820955	0.984996016123757	0.0456132662565086	0.0481399522539515	-0.0151176823626361	0.0463708221452578	0.0487119359490861	0.226954005674069	0.0992138889592377	5.71054195336629	0.262474728753821	1.00254092181897
399	2	A	EMS	EMS	1	1	1	5	B	3	B03	1	2	1	5	9	2	17422	13459	5635	5093	0.336053644118683	56	5.6612105007235	0.0802831978584306	5.30158336842819	0.118860775677613	0.935936313867317	0.0135568296881602	0.0135486419867479	0.704228709115285	0.0409289858984082	0.0409061543436196	0.935669002975605	0.0129091069285476	0.0131924578721893	5.6612372772473	0.0804976226109708	0.990230008222843	0.0497634010627106	0.0508245479349757	-0.00981803130006813	0.0500068750382737	0.0510377136100837	0.237683221416775	0.103628855891497	5.68555807450233	0.273203944496528	1.00796417046808
401	2	A	EMS	EMS	1	1	1	5	B	5	B05	1	2	1	5	9	2	17077	13906	6275	5655	0.212605148229311	55	5.65090269123048	0.0964191177545481	5.28740082993883	0.124789470709236	0.935302080097307	0.0119481179304162	0.0124696239758303	0.819707611998699	0.0204559296832339	0.0204530771717992	0.935129808176467	0.0117866294578083	0.0123003499848809	5.65093160104846	0.0964556008012573	0.988166386115841	0.0447428429686466	0.0469903581567773	-0.0119041884132976	0.0454715762607864	0.0474044592390144	0.233466716303087	0.0962159647896881	5.67525239830349	0.268987439382839	1.00582592960103
402	2	A	EMS	EMS	1	1	1	5	B	6	B06	1	2	1	5	9	2	17559	13960	6599	5975	0.437774644182613	55	5.65482605323016	0.0919953492664883	5.32202485273032	0.129986965437737	0.940430135540488	0.012278010739139	0.0123793529589763	0.721292075803514	0.0387523962141678	0.0387330148941097	0.94013054054556	0.0120176224105154	0.0118509530822388	5.65475646529665	0.0922220715501021	1.00764336270843	0.0474960476788083	0.0474514274491427	0.00761430020789487	0.047263215349326	0.0467749627521633	0.272572459978951	0.093433852604132	5.67907726255168	0.308093183058703	1.02600717653358
403	2	A	EMS	EMS	1	1	1	5	B	7	B07	1	2	1	5	9	2	16947	13591	5502	5026	0.546430869939201	56	5.66448213884762	0.071364560980927	5.29576166411231	0.115113136723004	0.934989427046355	0.0131575525410756	0.0134199589636508	0.621133291676844	0.0554077367844542	0.0553511400962083	0.934775876658964	0.0125567742400299	0.0129015422487533	5.66455443013016	0.0716221814807417	0.986816531739304	0.0477260214624102	0.0497371353204248	-0.013271141593883	0.0486649834227197	0.0499365183754033	0.230698970680936	0.102122436600351	5.68887522738519	0.266219693760688	1.00442726567769
404	2	A	EMS	EMS	1	1	1	5	B	8	B08	1	2	1	5	9	2	17763	14131	6863	6145	0.408748458268143	55	5.65753006536751	0.0884916062441996	5.29211867075688	0.124205240149192	0.935024682514186	0.0126189242051021	0.0131116149855039	0.756331964663271	0.0315849347305778	0.0315744378839782	0.934780863319642	0.0124477670492379	0.0127893405445072	5.65749078728524	0.088624201830312	0.986835524348979	0.0473248668400673	0.0489377897706241	-0.0132518954319579	0.0478528860020856	0.0493201612939055	0.230737966367915	0.100477267501722	5.68181158454027	0.266258689447667	1.00444694504342
406	2	A	SHAM	SHAM	1	1	1	5	B	10	B10	1	2	1	5	9	2	18911	14285	6384	5582	0.0564103667319036	56	5.66947866174519	0.089554590533067	5.30488349682363	0.124631907799015	0.935118905771749	0.013232424064096	0.0135679257970254	0.758225152882707	0.0312010615866028	0.0311909426870038	0.934960933586847	0.013208400895267	0.0132787753604801	5.66941648566674	0.0896841752032627	0.987521851812816	0.0503537586743209	0.0507563814472242	-0.0125566541008582	0.0510126912946928	0.0511742535195927	0.232146116728901	0.104064491277053	5.69373728292177	0.267666839808653	1.0051580895046
407	2	A	EMS	EMS	1	1	1	5	B	11	B11	1	2	1	5	9	2	18256	14621	5863	5415	0.601379236161438	55	5.66524036309359	0.0731415570900772	5.29743439434073	0.113282157778489	0.93440922747635	0.013103869171915	0.0134028102863901	0.626322119680354	0.0543820011244431	0.0543284862376163	0.933898026507382	0.0124828934739557	0.012874554459852	5.66526752233345	0.0732269453374466	0.983484592230943	0.0470837362194541	0.0493587925896879	-0.016653307538127	0.0478799045125477	0.0496936634775626	0.223834179574359	0.102043716817065	5.68958831958848	0.259354902654111	1.00097484616777
408	2	A	EMS	EMS	1	1	1	5	B	12	B12	1	2	1	5	9	2	18709	14224	5789	5155	0.169443423002466	56	5.66413782624778	0.0832180887475949	5.28668096935493	0.120845387925642	0.933050149611389	0.0135107353683547	0.0138096096663133	0.718627069007183	0.0378562611260204	0.0378381927678411	0.932846405438476	0.0131899889894785	0.0134564691632383	5.66424080426341	0.0834208635440034	0.979523089603948	0.0498567107636836	0.0507382824544491	-0.0206894690280591	0.0507357915979887	0.0514935746283964	0.215610499335247	0.105761841035748	5.68856160151844	0.251131222414999	0.996870099090659
409	2	A	EMS	EMS	1	1	1	5	C	1	C01	1	2	1	5	9	3	19793	16084	7573	6991	0.233928210272059	54	5.60899003144798	0.0848967146626816	5.22109328912131	0.123417941030832	0.930905865374927	0.0120050718712809	0.0120949675425741	0.638820459501671	0.0520745097130889	0.0520275150557867	0.930640171669062	0.0110341458951948	0.0113561432507037	5.60884283190173	0.0850995730120925	0.971317227352909	0.0407022152464944	0.0420668506764121	-0.0291021623439174	0.0419134908522378	0.0431062811725783	0.198357743957062	0.089212563047626	5.63214093013628	0.232775192947351	0.987828773773454
411	2	A	EMS	EMS	1	1	1	5	C	3	C03	1	2	1	5	9	3	17119	13530	5532	5057	0.248489561923481	56	5.66003307322936	0.0806369852482395	5.29260823885184	0.110721421527656	0.934522663222002	0.0126165687329442	0.0127881518745355	0.762268936759811	0.0304333427443934	0.0304239522930607	0.934303237036282	0.0125679883259831	0.0125758982210942	5.65989933575462	0.08081967709546	0.985019754130888	0.0477707904645682	0.0478426335648121	-0.0150935830559303	0.0486525046501446	0.0483665260299375	0.227002927251371	0.0985963073014811	5.68319743398917	0.26142037624166	1.0020111162202
412	2	A	EMS	EMS	1	1	1	5	C	4	C04	1	2	1	5	9	3	18242	13942	6186	5249	-0.0494016193364142	55	5.65165204411547	0.0908563216484122	5.28649688824188	0.129823896145921	0.934529449998941	0.013180445004704	0.0136674465939654	0.693804695187651	0.0425936970167748	0.0425679668638223	0.934125617676766	0.0124484746345596	0.0130911515143165	5.65163312836236	0.0908390715580027	0.984346234768048	0.0473120644563517	0.0500196858231323	-0.0157775792180403	0.0480133120011945	0.0504318123066153	0.225613943272133	0.103226157020085	5.67493122659691	0.260031392262421	1.00131401251057
413	2	A	EMS	EMS	1	1	1	5	C	5	C05	1	2	1	5	9	3	19449	15691	7575	6930	0.278404288499781	55	5.64258816279896	0.0911966278837818	5.27141870155885	0.131824155701257	0.933090280138208	0.0132473672776677	0.0135822709074863	0.664563563871804	0.0475892814642711	0.0475534044244578	0.932769031267362	0.0127506654152691	0.0129258950830364	5.64259882016196	0.0914646393257078	0.979232902356079	0.0477922505062615	0.0487774028813442	-0.0209857665264457	0.0488031738592287	0.0494976104372272	0.215005433061892	0.10173600746961	5.66589691839651	0.249422882052181	0.996021628668841
414	2	A	SHAM	SHAM	1	1	1	5	C	6	C06	1	2	1	5	9	3	16475	13439	5699	5293	0.46686975754539	55	5.64968916076866	0.0814222920438853	5.28339848168199	0.114951431256331	0.9348868716512	0.0127255774972891	0.013130339262166	0.72896603530554	0.0364481709499296	0.0364320437122826	0.934650500057133	0.0125012263038391	0.0128212053542539	5.64985080911784	0.0815614346469383	0.9863392551258	0.0473647525392751	0.0491622445336147	-0.013754911423045	0.0481708661850308	0.0494955530025377	0.229718525223664	0.101041062684491	5.67314890735239	0.264135974213953	1.00337682163147
416	NULL	A	NULL	NULL	1	1	1	5	C	8	C08	1	2	1	5	9	3	16854	13327	5320	5142	0.537291379517328	56	5.67365344655458	0.0758614236390198	2.86746748785905	0.19906903225283	0.505059911877732	0.0336628527237378	0.0363229278845142	0.383920926552867	0.0213511428686976	0.021347899298076	0.504751287626484	0.0336005273626144	0.0362989531101552	5.67355792356913	0.0760674407981723	0.516652242617684	0.00443876710002338	0.00463674484946862	-0.66038527564402	0.00859761909362426	0.00895679275189776	-3.13209473569793	0.274850384698977	5.69685602180368	-3.09767728670764	0.517242974778778
417	2	A	EMS	EMS	1	1	1	5	C	9	C09	1	2	1	5	9	3	16062	11866	5210	4284	-0.0849239313620078	55	5.66335221405923	0.094898919941745	5.24781865545831	0.126702823317281	0.925970844428246	0.0132957185738302	0.0138984442615888	0.73549861555366	0.033632417987661	0.0336197456011623	0.925473186046231	0.013056858718572	0.0134949708136879	5.66346604237148	0.0951290470439678	0.952644244738595	0.0459912167827495	0.0481453303642679	-0.0485137455234293	0.0484247926017517	0.0501839762025015	0.157951899828123	0.10631345276001	5.68676414060603	0.192369348818412	0.968501927110107
418	2	A	EMS	EMS	1	1	1	5	C	10	C10	1	2	1	5	9	3	14671	9822	3864	3116	-0.164891520013121	58	5.70756123243456	0.0829093064580789	5.33122275531318	0.111879148993532	0.933358321431869	0.011683065228115	0.0120929727177021	0.858934144886709	0.013039575663635	0.0130388366970142	0.933229628774576	0.011685469178312	0.0120413671048314	5.70746621162133	0.0829305615798062	0.980962937548343	0.0437550468914174	0.0452146055967419	-0.0192206005331944	0.0448248707061741	0.0460088287433174	0.218607307614678	0.0939659459021564	5.73076430985588	0.253024756604967	0.997812243782328
419	2	A	EMS	EMS	1	1	1	5	C	11	C11	1	2	1	5	9	3	15990	12818	5562	4922	0.312054127078417	56	5.66578964608713	0.0824696754240631	5.30116786216696	0.122387118838278	0.935027907709276	0.0121085946824508	0.0124565233613189	0.641437133929637	0.0518181563592634	0.0517718515911394	0.935028078867924	0.0116234888777571	0.0117566068845965	5.66581826086537	0.0823878586683954	0.987778019482182	0.0444983142169527	0.0448373415632284	-0.0122972831156236	0.0449613483697325	0.0452901643815729	0.23267119277489	0.0918805804974123	5.68911635909992	0.267088641765179	1.00486596659962
421	2	A	EMS	EMS	1	1	1	5	D	1	D01	1	2	1	5	9	4	17643	13389	5854	5210	0.133957508441907	56	5.66218625592568	0.0903564626277293	5.29293799789063	0.131695674679441	0.934749305794182	0.0139956761123761	0.0143430238784644	0.71315130597885	0.039136473051098	0.0391165100910808	0.934633712285097	0.0137860068655512	0.0139222980161356	5.6621272093346	0.0901095685036566	0.986275384063133	0.0521538127421427	0.0531678279715567	-0.0138196692776815	0.0530179276762851	0.0536057493375829	0.229587245138067	0.10928791372989	5.68810485897948	0.261127296102718	1.00186394445965
422	2	A	SHAM	SHAM	1	1	1	5	D	2	D02	1	2	1	5	9	4	16599	13394	6361	5694	0.37518725692013	55	5.66802509703078	0.0891989240276768	5.30037806478358	0.130002040276919	0.934321333132795	0.0126901739307983	0.0133523388837113	0.722653406352053	0.0373442112829783	0.0373268658385539	0.933979169179329	0.0124236244257905	0.012885559829781	5.6679368965939	0.0895638235293322	0.983791616914586	0.0468642127495787	0.0491675302147457	-0.016341176137564	0.0476948855715305	0.0496141228037987	0.22446871699458	0.101583824312747	5.69391454623878	0.256008767959231	0.999300590682955
423	2	A	EMS	EMS	1	1	1	5	D	3	D03	1	2	1	5	9	4	16086	12287	5626	5097	0.415320245962751	56	5.66290414539031	0.0852371657856742	5.31820111808393	0.123113796007591	0.938548042400477	0.0125558431041122	0.0126833509878336	0.692992603022117	0.0433621041560885	0.0433349572577695	0.938065531163374	0.0120760881979726	0.0121949657234336	5.6628551171016	0.0853846767883712	0.999508089669633	0.0470769108671883	0.0480627390366522	-0.000492031357944662	0.0472629938594211	0.0477476568831087	0.256424079776255	0.0961781999483619	5.68883276674648	0.287964130740905	1.01552066180216
424	2	A	EMS	EMS	1	1	1	5	D	4	D04	1	2	1	5	9	4	16959	12869	5615	4855	0.0282068068916215	55	5.65831577335451	0.0836962463341762	5.29104900670429	0.121069130024187	0.934227643009228	0.0127320662488212	0.0130268523694662	0.709883381276313	0.039648593454146	0.0396278370203823	0.934051203961849	0.0124046368334238	0.0125784097585107	5.6583290094198	0.0839386565884025	0.984064341458834	0.0465285912108616	0.0477727972606093	-0.0160639964061468	0.0473106744605697	0.0483284874278425	0.225032027775213	0.0986466165196351	5.68430665906468	0.256572078739863	0.999582054060432
426	2	A	EMS	EMS	1	1	1	5	D	6	D06	1	2	1	5	9	4	16431	11794	5256	4193	-0.265597331763256	55	5.67788605232931	0.0975782972726084	5.32721380468936	0.128706600966331	0.937330221609667	0.0128308864188395	0.013451829849217	0.788504280326829	0.0262115054636899	0.026205505126373	0.937319808930683	0.0127481066141403	0.0131770275775498	5.67807312275905	0.097699129643334	0.996602393433834	0.0497394428807695	0.0508842582665809	-0.00340339153844501	0.0500187887401458	0.0510386747505234	0.250592529448706	0.102419861906119	5.70405077240393	0.282132580413356	1.01252185918722
427	2	A	EMS	EMS	1	1	1	5	D	7	D07	1	2	1	5	9	4	17952	14419	6459	5859	0.453918801525649	55	5.65097448346043	0.08317988769321	5.26890777939072	0.119436389884146	0.93215960005177	0.0131331963242084	0.0133460121104469	0.708106410137291	0.0396485934541467	0.0396278370203795	0.931801890194147	0.0127230150042439	0.0129013337864324	5.65084376650971	0.0834902900952471	0.975620471962334	0.047491287721455	0.0484513579946169	-0.0246816288893006	0.0484639633729841	0.0492845899115664	0.207442386667854	0.101823157577056	5.67682141615459	0.238982437632504	0.990867620110197
428	2	A	EMS	EMS	1	1	1	5	D	8	D08	1	2	1	5	9	4	17536	13828	5896	5281	0.153266884753666	55	5.64500447760749	0.0928312374565284	5.25496114914206	0.127412916350912	0.930316060913759	0.0132406170141787	0.0137725938462834	0.726011097943807	0.0361921702242018	0.0361763802476308	0.930037157102669	0.0128452680043849	0.0133842388379823	5.644985832441	0.0927842882234946	0.969098902467406	0.0469514797077179	0.0493466304225535	-0.031388605769974	0.0484391814134713	0.0506310200860237	0.193642168052244	0.105145688251299	5.67096348208588	0.225182219016894	0.984137081861237
429	2	A	EMS	EMS	1	1	1	5	D	9	D09	1	2	1	5	9	4	17346	14131	5971	5575	0.546570647404969	55	5.65620173007851	0.0726127939447106	5.31096293718344	0.11291719369126	0.939095475109813	0.0124024721502674	0.0123566883301861	0.632950246914651	0.0541255851196299	0.0540728227729627	0.939225524830492	0.0118235030768899	0.0117849895746324	5.65623518325123	0.072735057734583	1.00406180305923	0.0464444380625234	0.0465369943169737	0.00405357620689746	0.0462117730893936	0.0462007157902385	0.265495234092031	0.0922841051576718	5.68221283289611	0.297035285056682	1.02022028850511
431	2	A	EMS	EMS	1	1	1	5	D	11	D11	1	2	1	5	9	4	17846	14324	5964	5477	0.501994982134292	56	5.66021544653789	0.0798813511432971	5.2929335738082	0.112791046642626	0.935149244675776	0.0131359178187262	0.013618366009677	0.757095983285859	0.0314569759882241	0.0314466061516532	0.934978964713633	0.013017161818499	0.0134062376852982	5.66009381433391	0.0798623785710832	0.987590629514843	0.0496692701890335	0.0512353915650148	-0.012487009694194	0.0502615629416205	0.0516549938413902	0.232287119924522	0.105031782425624	5.68607146397879	0.263827170889172	1.00322133393873
432	2	A	EMS	EMS	1	1	1	5	D	12	D12	1	2	1	5	9	4	18097	13775	5827	5235	0.238546068263931	56	5.65839874817136	0.083199209357814	5.28255640869074	0.122054507681112	0.933154375341477	0.0137409400444956	0.0140427386906983	0.732710147129022	0.0354241963377418	0.0354093898536922	0.93307934854085	0.0133043850931233	0.0137527661809197	5.65849349093536	0.0831949177412481	0.980397789692707	0.0499489434755324	0.0519729479179387	-0.0197968818261236	0.0510098868157679	0.0526784081035008	0.21743211516672	0.1081382839445	5.68447114058024	0.248972166131371	0.995798016042758
433	2	A	EMS	EMS	1	1	1	5	E	1	E01	2	2	1	5	10	1	13128	8482	3329	2577	-0.371008042464863	56	5.69504804118548	0.117135056768475	5.37467687394876	0.16690738151421	0.942535998442312	0.0150443329746344	0.0176146123518379	0.602151881651717	0.0597684364256462	0.0596974189952133	0.942004033095907	0.0146335889794382	0.0160882033233635	5.69543235774144	0.117824004524587	1.01513866545436	0.05915366855237	0.0654193401115224	0.0150252193737936	0.0579960605340567	0.0637760470993363	0.287223177922856	0.126939974942211	5.71823191345877	0.314924172891933	1.02961411964603
434	2	A	EMS	PETITE	1	1	1	5	E	2	E02	2	2	1	5	10	1	1285	926	554	496	-0.328077750540055	51	5.47927146883434	0.170471418803981	5.10941166744998	0.203978272433438	0.935863644607848	0.0256092119210879	0.0267473698459198	0.911348614299128	0.00447414048531086	0.00447411063132451	0.93549097632272	0.0258827675440423	0.0267392486531522	5.47923919998948	0.170382591290188	0.989547698021246	0.0996544454758606	0.0949083695297235	-0.01050731144653	0.102213628008766	0.098447027062437	0.236291054484834	0.193783279701832	5.50203875570681	0.263992049453911	1.00330434710821
436	2	A	EMS	EMS	1	1	1	5	E	4	E04	2	2	1	5	10	1	15734	11990	5108	4292	-0.0469227868932682	56	5.66210117276711	0.0914821041671166	5.29075005061235	0.126543182532425	0.9339860522333	0.0131781750449183	0.0135383399506784	0.763842761049398	0.0300494968197031	0.0300404570961002	0.933677562377915	0.0131585853986016	0.0132510891406161	5.66212897855549	0.0914114472047089	0.982651393080139	0.0495246427500467	0.0498024961893539	-0.0175008574603493	0.0507224820516767	0.0506248285916115	0.222110149352456	0.103138684806265	5.68492853427282	0.249811144321533	0.996214337133945
437	2	A	EMS	EMS	1	1	1	5	E	5	E05	2	2	1	5	10	1	15645	12452	5091	4566	0.244773784086138	55	5.65379600632295	0.0828620619430101	5.28913056123595	0.117927099011967	0.93521480286691	0.013501573673943	0.0137644467619617	0.729144279512422	0.0364481709499296	0.0364320437122857	0.934973133148663	0.0134327256384896	0.0134552384794552	5.65388465233924	0.0831514800047091	0.987568384607945	0.0512939804020303	0.0515708437423216	-0.0125095343913103	0.0518506526648193	0.0519238976021193	0.232241517160025	0.10572427555516	5.67668420805657	0.259942512129103	1.00126943827481
438	2	A	EMS	EMS	1	1	1	5	E	6	E06	2	2	1	5	10	1	17303	12901	5772	4876	-0.0900518869556191	56	5.66230016271471	0.0889109362136637	5.33073429916477	0.125059455946019	0.940634234689422	0.014197654634541	0.0144848347809771	0.704531688727702	0.041697285409985	0.041673144737557	0.940433448818599	0.0138925428579671	0.0140135384958378	5.66236192941049	0.0890538307709766	1.00884778162377	0.0552833410078063	0.055642553488043	0.00880886935598603	0.0549066535082838	0.055024892689177	0.274941203693533	0.109303305221841	5.68516148512782	0.30264219866261	1.02314653599265
439	2	A	EMS	EMS	1	1	1	5	E	7	E07	2	2	1	5	10	1	13961	10305	4420	3767	0.0433442143550855	56	5.67586812323544	0.0924309695144072	5.31879558923505	0.126126540715682	0.936660200310125	0.0132447900956357	0.0132959617688364	0.752304171923262	0.0324806750939404	0.0324692600102444	0.93632508353701	0.0128028026225267	0.0129341095398453	5.67586533015117	0.0925334345827019	0.992752742394682	0.0492762508936486	0.0499618277422472	-0.00727364655234839	0.0496038085011226	0.0501141658360379	0.242813773578212	0.101348500185201	5.6986648858685	0.270514768547289	1.00659941552089
441	2	A	SHAM	SHAM	1	1	1	5	E	9	E09	2	2	1	5	10	1	17039	12100	5642	4619	-0.204360953032246	56	5.66716239209186	0.101906845486509	5.314798057842	0.137995982017439	0.936351695461206	0.0142545161349805	0.0144463243188409	0.753728838025042	0.0322247440255113	0.0322135965455956	0.935870567066374	0.014136953829323	0.0140610192223988	5.66717470803027	0.101795957978923	0.991003677304024	0.0543015501806483	0.053999837350298	-0.00903703395870692	0.0546364673199279	0.0542963213540397	0.23925945327365	0.109929709890727	5.6899742637476	0.266960448242727	1.0048012222791
442	2	A	EMS	EMS	1	1	1	5	E	10	E10	2	2	1	5	10	1	17428	12123	5037	4212	-0.163939136729514	56	5.69176423863149	0.0876740920513747	5.33213030418913	0.125997536405781	0.936079477491692	0.012315588915576	0.0133096239862839	0.735910292658021	0.0351682143605089	0.0351537263890453	0.935722631234293	0.0123861625751038	0.0129220101751803	5.69181815945612	0.0878861370878358	0.990435732037402	0.0473035447422966	0.049997219274943	-0.00961029932357265	0.0477348760361742	0.0500949429291567	0.238102594621619	0.101899229009834	5.71461771517345	0.265803589590696	1.00421732443242
443	2	A	EMS	EMS	1	1	1	5	E	11	E11	2	2	1	5	10	1	20285	16944	7930	7503	0.475744821008321	55	5.6382246061328	0.0756223407471193	5.27155585361133	0.120223567080022	0.934940488637863	0.0118686989614053	0.0120335572687423	0.474809108630348	0.0816092674823598	0.0814288134902622	0.934856586151352	0.0102720053274011	0.0105479495989936	5.63841995870783	0.0758173959651791	0.987124019759745	0.0389114337934837	0.0406119951254954	-0.012959594190343	0.039490892531407	0.040845941996953	0.231330119162485	0.0833336916968069	5.66121951442516	0.259031114131562	1.00081259200237
444	2	A	EMS	PETITE	1	1	1	5	E	12	E12	2	2	1	5	10	1	2633	2274	1250	1125	-0.31186428142087	51	5.45735043103921	0.134714920032908	5.1347793451596	0.151654445364283	0.940902279456617	0.0161199970385412	0.0183546778032705	0.948576132668415	-0.00140614998226097	-0.00140614905551251	0.940892881098141	0.016217950171098	0.0183537790638585	5.45737452002062	0.134747991318355	1.01068002259039	0.064914737046417	0.0694756766908251	0.0106233939888003	0.0643582500677274	0.0701635993865786	0.278533965623046	0.135987412909478	5.48017407573795	0.306234960592123	1.02503024137394
446	2	A	EMS	EMS	1	1	1	5	F	2	F02	2	2	1	5	10	2	17142	13695	5304	4833	0.351424397292918	55	5.65758357297331	0.0762838500198053	5.28763156061331	0.1184314251289	0.934496572741428	0.0132329695888792	0.0137026008143481	0.647857082112928	0.050664649833508	0.0506213660002236	0.934478067529094	0.0128317042004398	0.0132022661000343	5.65772778933946	0.0763265570915784	0.985683612537126	0.0485129471068025	0.0504667244309423	-0.014419855652225	0.0492643556185933	0.0508747905798159	0.228370102283744	0.103862060138944	5.6783510726914	0.252851994198814	0.997726210341022
447	2	A	EMS	EMS	1	1	1	5	F	3	F03	2	2	1	5	10	2	14127	9335	3891	2913	-0.449716287925946	58	5.74162425750381	0.127852187176532	5.42022647889829	0.147073962307306	0.942683883095425	0.0128919770165316	0.0139215337563576	0.856803951772017	0.0149574279806224	0.0149563126818782	0.942627123029485	0.013116501315075	0.013798971264364	5.74155452363837	0.127532473471314	1.01765590135159	0.0528539742403875	0.0560500037702999	0.0175018465991929	0.0520476576961215	0.0547822112984049	0.292095743265488	0.108231023915695	5.76217780699031	0.316577635180557	1.03049090145053
448	2	A	EMS	EMS	1	1	1	5	F	4	F04	2	2	1	5	10	2	16614	12836	5385	4576	-0.108559631690595	56	5.66843483684957	0.092071683191429	5.30530944167681	0.136040798213289	0.935277744415734	0.0147358956835574	0.0151353227109912	0.718515030520284	0.0382403115029763	0.038221687964821	0.935294743832341	0.0144672801776778	0.0147311038766911	5.66841923078868	0.0922646229224234	0.988796709272582	0.0553916952433191	0.0562254168675623	-0.0112665203227528	0.0559520574174805	0.0566736799121118	0.234756513831082	0.114976984960624	5.68904251414062	0.259238405746152	1.00091646217201
449	2	A	EMS	EMS	1	1	1	5	F	5	F05	2	2	1	5	10	2	16226	13202	4941	4585	0.431776624513401	55	5.67827248237492	0.0679706294734281	5.32754487480124	0.107974283346039	0.937985648523185	0.0130934225714835	0.0130664298374497	0.622637324447148	0.0555359618713021	0.0554789718285293	0.937828530552077	0.0123906120759861	0.0125613230458929	5.6784295989969	0.0682728213543885	0.998582782582029	0.0483297209631885	0.049371239617238	-0.00141822262041505	0.0486159787131712	0.0491061168335073	0.254570734211583	0.0989799105449944	5.69905288234884	0.279052626126652	1.0109450738557
451	2	A	EMS	EMS	1	1	1	5	F	7	F07	2	2	1	5	10	2	16428	13081	4982	4592	0.443580606546893	56	5.66489148216199	0.0733518809456534	5.30579939885218	0.113254205964388	0.936267937208082	0.0133829702398892	0.0135321199382782	0.676840068251074	0.045795734971078	0.0457637601719152	0.93616828978231	0.0129435531997544	0.0131557817144541	5.66482596198565	0.0732248341073911	0.992148668279407	0.0497515969356906	0.0509790352038083	-0.00788231587540167	0.0502463550248021	0.0510502220008653	0.241587646572869	0.103538798427821	5.68544924533759	0.266069538487939	1.00435149624504
452	2	A	EMS	EMS	1	1	1	5	F	8	F08	2	2	1	5	10	2	17954	15077	6753	6222	-0.312631081342675	52	5.52544132479103	0.0994613108536208	5.09309934695655	0.133431284692214	0.921509440939142	0.0112872407614285	0.0115201591354151	0.716580802744599	0.0370881937113491	0.0370712023738994	0.921375791941263	0.0105874351293164	0.0109603451842951	5.52539029781085	0.099766857340419	0.938363809167898	0.0361420455281319	0.0382214670650293	-0.0636175489416799	0.0386786085437987	0.0403252047018838	0.125910263939098	0.0871478967658948	5.54601358116279	0.150392155854168	0.949233631353243
453	2	A	EMS	EMS	1	1	1	5	F	9	F09	2	2	1	5	10	2	18216	12530	6008	4607	-0.417428028334902	56	5.66277388139847	0.107016569545686	5.31950788216388	0.153252587749245	0.937761314433209	0.015292768282268	0.0159036155269617	0.713965311461965	0.0395205614171505	0.0395000052880554	0.937288692840773	0.0154954517215764	0.0152693563018765	5.66283643609434	0.1071909971653	0.996481517906999	0.0603384834032121	0.0593067735537077	-0.0035246865088124	0.0604348209359661	0.0592481380669122	0.25034920152263	0.119401755370171	5.68345971944628	0.2748310934377	1.00879173136539
456	2	A	SHAM	SHAM	1	1	1	5	F	12	F12	2	2	1	5	10	2	18013	13763	5694	5093	0.154230604252672	56	5.66864213075986	0.0841617799564525	5.30656869627983	0.128357188711927	0.935305050358169	0.0149748634938691	0.014848916942185	0.702567426489104	0.0410570324427708	0.0410339860759383	0.935361195413982	0.0149127830449346	0.0144467361855802	5.668701895196	0.0842138885633197	0.989050892415234	0.0565249354766208	0.0556206995005729	-0.0110094902250912	0.0573895751617054	0.0558448182193716	0.235276165266214	0.113681290888024	5.68932517854794	0.259758057181283	1.00117694499833
457	2	A	EMS	EMS	1	1	1	5	G	1	G01	2	2	1	5	10	3	18512	14140	5534	4927	0.0871498292226756	56	5.6801142297977	0.0820063561446641	5.32681495934647	0.124707475342571	0.937738070778038	0.014034812789796	0.0142771608600084	0.710347776795666	0.0400326973689172	0.0400113322173492	0.937710305312398	0.0138292263968183	0.0138837448523996	5.68008314503072	0.0822232452706813	0.998121843669584	0.0537964240036559	0.0541043896282598	-0.00187992227751274	0.0541383041662328	0.0539993894155071	0.253646212446029	0.108569301063535	5.70072816959658	0.276126269008816	1.00945141522054
458	2	A	EMS	EMS	1	1	1	5	G	2	G02	2	2	1	5	10	3	15526	12201	5638	5045	0.290595597831897	56	5.65349616018911	0.0992624599527308	5.30019099741992	0.144333118287257	0.936850602613213	0.0142667579968932	0.0146329254763334	0.736580044640001	0.0354241963377426	0.0354093898536953	0.936478611661778	0.0141318953337601	0.0141829244811372	5.65345640689691	0.0994250087030841	0.993344953578567	0.0539439488950526	0.0553998770033216	-0.00667728998576347	0.0545937084205543	0.0552281915478955	0.244014364021985	0.11224484360556	5.67410143146278	0.266494420584773	1.00456592426676
459	2	A	EMS	EMS	1	1	1	5	G	3	G03	2	2	1	5	10	3	12626	9265	3999	3278	0.0997010976416344	57	5.70218445269741	0.112413884479488	5.31362364919035	0.1401543630808	0.93069461094785	0.0129052771423662	0.0137854549400056	0.823530739905093	0.0187934767687256	0.0187912646516024	0.930522719115047	0.0126140364332082	0.0136409954920998	5.70215909333867	0.112114586379099	0.970884330990476	0.0466266339042454	0.0503780758736362	-0.0295479413895683	0.0478974751599423	0.0516282045342595	0.197439264635186	0.106936627493842	5.72280411790453	0.219919321197973	0.981594667574706
462	2	A	EMS	EMS	1	1	1	5	G	6	G06	2	2	1	5	10	3	20670	17226	7589	6868	0.114883641952593	54	5.63059718632876	0.100639711426544	5.13172128676069	0.1278357040511	0.910641921734111	0.0119830529551862	0.0125082637196968	0.773858915651	0.0242928061725358	0.0242880291415144	0.910240588342775	0.0117145788121174	0.0122487562604173	5.63088320067532	0.100536910136041	0.901788825813608	0.0369200890956025	0.0388259953943949	-0.103374904203991	0.0409608482939344	0.0427732857211352	0.03883293559631	0.0965804799976214	5.65152822524118	0.0613129921590974	0.910928301161223
463	2	A	EMS	EMS	1	1	1	5	G	7	G07	2	2	1	5	10	3	17895	14154	5593	5126	0.311529159604973	56	5.66288621235983	0.0811075607404524	5.29375467734346	0.119694549211882	0.934002896834591	0.0144429135366695	0.0143340388759841	0.728325906951921	0.0363201699927785	0.036304211979958	0.933990521650101	0.0139951688475199	0.0140572180439549	5.66286260263003	0.0811975922957328	0.98383458690242	0.052693539852154	0.0534394766768684	-0.0162974988970484	0.0537606825512797	0.0540036349743773	0.22455749228844	0.110400186534431	5.68350762719589	0.247037548851227	0.99483934285538
464	2	A	SHAM	SHAM	1	1	1	5	G	8	G08	2	2	1	5	10	3	16667	13427	5431	4818	0.156331560100422	55	5.65183455629379	0.0932072289110787	5.29542082799163	0.123374635140824	0.935935857220817	0.0136907965513974	0.0137338277674265	0.803697198360762	0.0233974751990567	0.0233932070152516	0.935752916240364	0.0134839884583945	0.0135622937156151	5.6516286444223	0.0931764656498004	0.990551947336779	0.0516551283380949	0.0526609270681586	-0.00949296897090345	0.0522285032072715	0.0526719576235465	0.238339424736015	0.107302710821233	5.67227366898816	0.260819481298802	1.0017094200416
466	2	A	EMS	EMS	1	1	1	5	G	10	G10	2	2	1	5	10	3	17779	13969	5700	5120	0.315569443584313	55	5.65854653756041	0.0796480183170295	5.29524263220531	0.117701200659144	0.93530601211263	0.0130870719387589	0.0136279866293009	0.685591170992778	0.0441305624089665	0.0441019476517061	0.935165273205999	0.0128879618968054	0.0132072976221102	5.65858311919965	0.0797933565074217	0.988301851746858	0.0489856210088148	0.0509652739890274	-0.0117671099362812	0.0497216693653564	0.0511374085627261	0.233744052964945	0.104325938770959	5.67922814376552	0.256224109527732	0.999408169344962
467	2	A	EMS	EMS	1	1	1	5	G	11	G11	2	2	1	5	10	3	15670	11963	4825	4424	0.22918574179444	56	5.69284603835447	0.0733203990049485	5.33936397511572	0.11421919042699	0.937629487356505	0.0124776960447097	0.0128968517517218	0.592994823068125	0.0605382021516952	0.0604644093891575	0.937406996543848	0.0118731172503072	0.0121570688578831	5.69294630980375	0.0732772813966761	0.996941244711009	0.0462498357816746	0.0473990082268746	-0.00306344287257974	0.0464670725751894	0.0473415869818085	0.25127433699472	0.0953397232782803	5.71359133436961	0.273754393557508	1.00824397577306
468	2	A	EMS	EMS	1	1	1	5	G	12	G12	2	2	1	5	10	3	19974	15569	6531	6010	0.455276262927447	55	5.65571598885279	0.0732606662856298	5.27596633401186	0.122465276491103	0.932666383057455	0.0137738243050287	0.0141035963285445	0.505297559955683	0.0755640530649171	0.0754207220710431	0.932542070408104	0.0128902669209361	0.0130604662967825	5.65568136245725	0.0734006476471346	0.978382711278963	0.0481874908207974	0.0489649836597619	-0.0218543651676541	0.0492881888497606	0.0498407024100123	0.213230598393248	0.102308668390026	5.67632638702312	0.235710654956035	0.989263520818017
469	2	A	EMS	EMS	1	1	1	5	H	1	H01	2	2	1	5	10	4	19444	14187	5980	4963	-0.307361691427854	56	5.67485654986279	0.103456721097054	5.31578777752365	0.160257002876291	0.93568547995697	0.0172825885741588	0.018049289517233	0.720856628552657	0.0378562611260204	0.0378381927678382	0.935470632730974	0.0169237098678697	0.0175630008515762	5.67495944977391	0.10340237585203	0.989469787892885	0.0644938473472694	0.0677647661484994	-0.0105860471061192	0.0653834207075726	0.0678032554541349	0.236131965447269	0.138383663841909	5.69197276193888	0.256915449859688	0.999753700372443
471	2	A	SHAM	SHAM	1	1	1	5	H	3	H03	2	2	1	5	10	4	18456	14310	6332	5700	0.0464119466109274	56	5.67552172046846	0.0983683006739272	5.31749190364553	0.13652713394017	0.93551106670627	0.014511993448861	0.0148514227883974	0.7504400095115	0.0326086422200309	0.0325970917425678	0.935186464000774	0.0141386200878111	0.0144860190184557	5.67548765053538	0.0981387164795739	0.988382812200196	0.053696192887328	0.05565320355912	-0.0116851946059159	0.0544400357495857	0.0559302687087282	0.233909765318279	0.113903255968153	5.69250096270035	0.254693249730699	0.99864389714119
472	2	A	EMS	EMS	1	1	1	5	H	4	H04	2	2	1	5	10	4	18030	13958	5816	5231	0.237131624103401	55	5.66229024142528	0.0844940937036063	5.3137828831552	0.132978581730703	0.937755038311049	0.015259798846015	0.0150463418393725	0.665388804871563	0.0481017789315808	0.0480647313537453	0.93745796772421	0.0146865072017132	0.0145058748678892	5.662493495513	0.0845378781695205	0.997139449169009	0.056682737233182	0.0569279628074476	-0.00286465002568878	0.0570925928510858	0.0566147425042706	0.251672931671309	0.114460902955733	5.67950680767797	0.272456416083728	1.0075844319372
473	2	A	EMS	EMS	1	1	1	5	H	5	H05	2	2	1	5	10	4	17809	13358	5448	4824	-0.0444824784232867	56	5.67662594524361	0.0916985624050562	5.32233612491327	0.136804144040052	0.936230223951608	0.015642382141912	0.0158502187643689	0.740952611646	0.0344002959133196	0.0343867359951026	0.936219385751013	0.0155267261549015	0.0155252536799534	5.67649405369929	0.0918963103242135	0.992345442606529	0.0595932060386201	0.0600895688279744	-0.0076840039569099	0.0600590999807833	0.060135206911162	0.241987216851187	0.121993605000164	5.69350736586426	0.262770701263607	1.00268974661031
474	2	A	EMS	EMS	1	1	1	5	H	6	H06	2	2	1	5	10	4	16646	12334	5379	4750	0.0863824618847175	56	5.68229177261954	0.0918442469921794	5.32246532523335	0.140489016152942	0.936420916167266	0.0147722891383278	0.014978446776002	0.704578066547084	0.0408009406939168	0.0407783226112889	0.93642663336482	0.0144793060761618	0.0145050174969573	5.68234199182595	0.092121520479538	0.993144375663802	0.0558218266570704	0.0564184588653966	-0.00687923209042858	0.0560195855712847	0.0563535934177606	0.243607893578256	0.114355049241982	5.69935530399092	0.264391377990675	1.00350545803282
476	2	A	EMS	EMS	1	1	1	5	H	8	H08	2	2	1	5	10	4	17624	13352	5898	5078	-0.0406413100462522	55	5.66416323583014	0.0950057811607346	5.30683660466727	0.134656467979799	0.936080730544097	0.0145311107972204	0.0143745695723822	0.77094833558437	0.0291538905367591	0.0291456349698285	0.936127675598693	0.0143231504498729	0.0140881024538876	5.6640181451456	0.0950021143229993	0.991992315686667	0.0552395980911236	0.0542783925717672	-0.00803991801577438	0.0557197083822593	0.0544825301670686	0.241270042867189	0.110274835836926	5.68103145731057	0.262053527279609	1.00232920368434
477	2	A	EMS	EMS	1	1	1	5	H	9	H09	2	2	1	5	10	4	18416	13818	6012	5085	-0.148938234415279	55	5.64624488068505	0.0960439528431875	5.28311570914959	0.145238231211758	0.934836050739747	0.0162497445243828	0.0164217687552627	0.731208906241211	0.0360641716400069	0.0360485485153081	0.934596188490204	0.0161175381835096	0.0160126446053076	5.64624816489845	0.0959949365430108	0.986132650117877	0.0613175854617974	0.0609379683466031	-0.013964399840223	0.0622224803412206	0.0614766806118389	0.229293808590536	0.12529640935693	5.66326147706342	0.250077293002956	0.996346479483555
478	2	A	EMS	EMS	1	1	1	5	H	10	H10	2	2	1	5	10	4	17400	13040	5199	4514	-0.0660641863973286	56	5.6763862945548	0.0910843605533959	5.31190423577053	0.136879030257496	0.9352683980313	0.0155787439785981	0.0157437412750309	0.769053411609417	0.0292818313970859	0.0292734667021568	0.935372294775055	0.015348099965923	0.0154883102363249	5.67630854268313	0.0910740093529451	0.989093362672023	0.0583734893439835	0.0596663502004424	-0.0109665513997192	0.0589943820751749	0.0598445284951691	0.235362965039044	0.121939476516724	5.6933218548481	0.256146449451463	0.999369369858663
479	2	A	EMS	EMS	1	1	1	5	H	11	H11	2	2	1	5	10	4	18557	14466	6199	5568	0.205131589599125	55	5.65629085287646	0.088199654084425	5.30418235816532	0.128386764335106	0.937136319207817	0.0149787071302149	0.0152307212777331	0.754863794339995	0.032224744025518	0.0322135965455956	0.937012478196953	0.0148052884320212	0.0149764230546675	5.65619411379723	0.0884902720491211	0.995409806372979	0.0573905557773856	0.0585208523447133	-0.00460076136528955	0.0576551060334523	0.0583081343455076	0.248189203908299	0.118074232593783	5.6732074259622	0.268972688320719	1.00581846497321
483	2	B	EMS	EMS	1	1	1	6	A	3	A03	1	2	2	6	11	1	14502	10217	4364	3679	1.76612214186633e-07	56	5.67117469471319	0.0957058596703767	5.30290643121309	0.141378227881453	0.934665980436203	0.0143280868964647	0.014874506399356	0.627710331769213	0.0541255851196299	0.0540728227729647	0.934348434254967	0.0133222727661551	0.0139982121204579	5.67129757043026	0.0956707133715856	0.98519128797751	0.0507722551082789	0.0538411895490205	-0.0149194556722238	0.0513544874133149	0.0540757377941125	0.227356369651059	0.110919197844965	5.68987425447198	0.286556947675269	1.01479543371984
484	2	B	EMS	EMS	1	1	1	6	A	4	A04	1	2	2	6	11	1	19244	14709	6128	5466	0.115822289688838	56	5.67657884807658	0.0857583681955287	5.29145543427242	0.120713228696092	0.931313488107018	0.0141181890069267	0.0143141809307521	0.760008845124215	0.0301774444727122	0.0301682888284195	0.931085302232181	0.0138406368588605	0.014078141205192	5.67658263611277	0.0857217254400978	0.972961465205532	0.0513332703414225	0.0522789593978799	-0.0274108020937097	0.0530009172428318	0.0534305367114095	0.201838668158837	0.110484461956666	5.69515932015449	0.261039246183047	1.0018197381463
485	2	B	EMS	EMS	1	1	1	6	A	5	A05	1	2	2	6	11	1	18316	14035	6245	5549	-0.052475687013807	56	5.66693335674271	0.0997205618890589	5.28707356463876	0.13172639768307	0.932288496104824	0.0135492244279382	0.0140645768589344	0.796797286566996	0.023909088215519	0.0239045339445542	0.931900416127203	0.0136743187922362	0.0138605787884914	5.66679815084107	0.0996558669559195	0.975987233853546	0.0511830246558111	0.0518035298614984	-0.0243057727226773	0.0522951574337284	0.0527837328464589	0.208212859790416	0.108784081121335	5.68537483488279	0.267413437814625	1.00503004246425
488	2	B	EMS	EMS	1	1	1	6	A	8	A08	1	2	2	6	11	1	17986	13622	6297	5474	0.0444403647199079	55	5.65718210507907	0.0926551886575399	5.2868043946675	0.128672450098191	0.934479114888023	0.0135839865060531	0.0139643125539408	0.739146350079299	0.0345282794827044	0.0345145677274232	0.933982280496401	0.0134286499491659	0.0135995857661275	5.65701353032677	0.0928344738155761	0.983803392758196	0.0504497766440737	0.0515993411213205	-0.0163292061054795	0.0514138376564473	0.0522012671662626	0.224493046479331	0.106605535298026	5.67559021436849	0.28369362450354	1.01332289350486
489	2	B	EMS	EMS	1	1	1	6	A	9	A09	1	2	2	6	11	1	17866	13535	5737	4995	-0.0903280232303469	56	5.68088460760152	0.0955567689986431	5.29274327137707	0.130701369765938	0.931169680092836	0.0130798954083406	0.0138948882231648	0.757554498990604	0.0305612933714443	0.0305517840253822	0.930771872338598	0.0132338758606317	0.0135658692267392	5.68084066165366	0.0953858330819174	0.971803111312435	0.0489664076338498	0.0499659758305059	-0.0286020554179756	0.0503786572636606	0.0512827118438579	0.199387643628689	0.105855422674679	5.69941734569538	0.258588221652898	1.0005907385309
490	2	B	EMS	EMS	1	1	1	6	A	10	A10	1	2	2	6	11	1	20197	14843	6091	5119	-0.420204927180971	56	5.69108060761192	0.125971278888672	5.24500898906716	0.160008153637104	0.919094420441861	0.015232545609392	0.0162915669414209	0.717492463623897	0.0354241963377426	0.035409389853689	0.918328567892629	0.0149983303724607	0.015650539524137	5.69126213512845	0.125684511782155	0.928036252742068	0.0503006809487546	0.052603798560677	-0.0746844815041563	0.0541690473945447	0.0563145520161655	0.102080961681022	0.122833152494876	5.70983881917017	0.161281539705231	0.954154625464701
492	2	B	EMS	EMS	1	1	1	6	A	12	A12	1	2	2	6	11	1	15397	11990	4956	4295	-0.177219584590388	55	5.65418520842195	0.101743755540338	5.23756635705811	0.142455958717462	0.924934837053518	0.0143334156066991	0.0148045077334162	0.711612341959551	0.0377282468172817	0.0377103610355209	0.924298793539451	0.0141244195732053	0.014238660825782	5.65424417706153	0.101930406980379	0.948504310128991	0.0492179012839406	0.0501646975884251	-0.0528689454645298	0.0521807035608044	0.0525809045576502	0.148768145997191	0.111794568507769	5.67282086110325	0.2079687240214	0.975870989355347
493	2	B	EMS	EMS	1	1	1	6	B	1	B01	1	2	2	6	11	2	17910	13808	5856	5272	0.0739224491487569	56	5.65956158728298	0.092731935410002	5.26479067874172	0.124477997738893	0.92974585747642	0.0133617131145537	0.0137151140032838	0.780676256961581	0.0263394254512219	0.0263333368586893	0.92965945471718	0.0132009941717709	0.0135040751350424	5.65964582971596	0.0929666606698858	0.967714758156611	0.0482787233349851	0.0493173731543265	-0.0328179066332765	0.0499574670297291	0.0508340299815786	0.190688534908066	0.105394184598653	5.68069048912776	0.247340031651472	0.994989111784217
494	2	B	EMS	EMS	1	1	1	6	B	2	B02	1	2	2	6	11	2	17964	14359	5790	5405	0.472397504750272	56	5.67299508843047	0.0760491329317904	5.27806962025786	0.115450810962582	0.93042907229535	0.0130730964095104	0.0130748778937315	0.68806872991761	0.0427217613623552	0.0426957985961477	0.930352747962483	0.0127685492992601	0.0127079918063439	5.67296217558541	0.0762094893604324	0.970258569739237	0.0468492345370349	0.0471128815388385	-0.0301926762658283	0.0483568791248213	0.048223978376893	0.196110089620413	0.100138672132132	5.69400683499721	0.252761586363818	0.997681194333678
495	2	B	EMS	PETITE	1	1	1	6	B	3	B03	1	2	2	6	11	2	838	552	284	247	-0.458724838739523	51	5.47992496573234	0.17086693796963	5.12408994773233	0.196484830820729	0.935168670567445	0.0242335019535344	0.0259044651775826	0.834984824207173	0.0182819741121917	0.0182799377222985	0.934382188559304	0.0246359401353556	0.0257517741710687	5.47991058728863	0.171037212479603	0.985319432882712	0.0953438810785289	0.091429323369931	-0.014789393040211	0.0970109237548072	0.0947703887154188	0.227620328422682	0.188305473364336	5.50095524670043	0.284271825166088	1.01361990894811
498	2	B	EMS	EMS	1	1	1	6	B	6	B06	1	2	2	6	11	2	17412	13931	5770	5384	0.378610830151286	56	5.65858323878627	0.0783586562808395	5.28403348288191	0.11457813742774	0.933545229994203	0.0128116437890877	0.0131365573033674	0.681654466664589	0.0445148109871478	0.0444854428486826	0.933509962763424	0.0126121800190785	0.0127190699457513	5.6585138916691	0.0783060287183327	0.982018945020592	0.0477137338732634	0.0481137084971887	-0.0181446785620398	0.048480309588352	0.0487676403863327	0.220799519936482	0.0997719613860267	5.6795585510809	0.277451016679887	1.01012704578207
499	NULL	B	NULL	NULL	1	1	1	6	B	7	B07	1	2	2	6	11	2	17802	13852	6190	5902	0.144467252022548	56	5.65749470813126	0.0892147341703017	2.89431606268444	0.195722218718574	0.510799005966048	0.0334721344422558	0.0353783285700888	0.592527120897219	-0.014445990521866	-0.014444985752595	0.510821794573275	0.0335717435844331	0.0353582174443271	5.65743648391022	0.0892035998624788	0.517472401105748	0.00465875790881242	0.00471637219481312	-0.658799086462306	0.00900570418651742	0.00909912213340064	-3.08462335351017	0.2666089116109	5.67848114332202	-3.02797185676676	0.51850351012908
500	2	B	EMS	EMS	1	1	1	6	B	8	B08	1	2	2	6	11	2	17625	14280	7192	6535	0.31718383356766	55	5.64849857273165	0.093851373625097	5.27090698456794	0.128063103409714	0.932525675866492	0.0130627438432588	0.0130982702829743	0.775076412099193	0.0278745336906681	0.0278673176465867	0.932270006351406	0.0127157917388574	0.0128229932709849	5.64849208792428	0.0937398999484213	0.977365551026913	0.0472397782521089	0.0481682492018738	-0.022894540289102	0.0484156336055312	0.0489905837169165	0.211103056566811	0.100858303531698	5.66953674733608	0.267754553310217	1.0052024197399
502	2	B	EMS	EMS	1	1	1	6	B	10	B10	1	2	2	6	11	2	17758	13585	5561	5038	0.280191157738595	56	5.67143852215021	0.0752706248432884	5.28334872606971	0.112681379377326	0.931420872761785	0.012354833752897	0.0128023521212854	0.673146180906995	0.0455395383104445	0.0455080967072716	0.931290561934148	0.0122183744243525	0.0123610059351808	5.67152034340285	0.0753599982430838	0.973721589295593	0.0452962091955008	0.046013026517547	-0.0266298588187718	0.0465447652523784	0.0470183187059962	0.203443798008021	0.0970863047734676	5.69256500281465	0.260095294751426	1.0013460626674
503	2	B	EMS	EMS	1	1	1	6	B	11	B11	1	2	2	6	11	2	16691	13527	6290	5672	0.431703611507131	55	5.64463008977148	0.0906030580103495	5.24084242286162	0.130009301790004	0.928152195526168	0.0134380180323281	0.0138140956267084	0.733975250116793	0.034400295913321	0.0343867359951026	0.927905004697617	0.0131235473047629	0.0134468797975656	5.64474898896111	0.0908448281150513	0.961338653528449	0.0471601892125834	0.0490461938789189	-0.0394285350980562	0.0492079891934229	0.0505837366063254	0.176968729279126	0.106262605020792	5.66579364837291	0.233620226022532	0.988241363593963
504	2	B	EMS	EMS	1	1	1	6	B	12	B12	1	2	2	6	11	2	17002	13097	5435	4842	0.105327611641306	56	5.66634197944561	0.0882940900602867	5.27643308002966	0.121864914849577	0.930869210796905	0.0126335702024625	0.012995289569188	0.763498410675569	0.0295377159953398	0.029529130166792	0.93062333361228	0.012428516413987	0.012731534838799	5.66622402767553	0.0884939462104394	0.971255142700336	0.0457119686719466	0.0471745310495295	-0.0291660823877644	0.0473235755402446	0.0483040427930582	0.198226070310156	0.100057764031671	5.68726868708733	0.254877567053561	0.998735854472882
505	2	B	SHAM	SHAM	1	1	1	6	C	1	C01	1	2	2	6	11	3	18467	14215	5836	5268	0.189115065202951	56	5.6706215223076	0.0845584686949319	5.279814040831	0.124059159685696	0.930768999993639	0.0138361393968478	0.0141164570683376	0.703758724697431	0.0400326973689172	0.0400113322173464	0.930753394539267	0.0137417494702942	0.0137149092166742	5.67073454702442	0.0849388695581169	0.971734911010313	0.0505362211661639	0.0508306002342242	-0.0286722370765507	0.0521590981097453	0.0520100864272391	0.199243147433306	0.107702734295433	5.69075650741574	0.254791370087248	0.998692848032833
507	2	B	EMS	EMS	1	1	1	6	C	3	C03	1	2	2	6	11	3	16881	13449	5841	5348	0.175258771663918	55	5.64622428485398	0.0914507425713575	5.28208599365847	0.125598540989881	0.934473537358334	0.0132658867519811	0.0135150843211045	0.779976937122604	0.0273628167145552	0.0273559907172869	0.93432790123832	0.0131583916084996	0.0132961241189479	5.64632096865243	0.0916123303517598	0.985113353062885	0.0498485410196513	0.0508838520966489	-0.0149985652415982	0.0508183936930355	0.0512697645469824	0.227195801648781	0.104843567221252	5.66634292904375	0.282744024302723	1.01283546660146
508	2	B	EMS	EMS	1	1	1	6	C	4	C04	1	2	2	6	11	3	17647	13348	5702	4792	-0.0756907739016492	55	5.65288618764096	0.0893074839750104	5.27136640223459	0.124754215413703	0.931932660803776	0.0140396191134217	0.0141226549122396	0.698394241300824	0.0413131295679617	0.0412896495405858	0.931591053304192	0.0135333098526067	0.0136442865479712	5.65274373311364	0.0891652134377829	0.974836582261364	0.0505411540682354	0.0509247679778342	-0.0254854299707134	0.0516058507633435	0.0519356561506121	0.205793641497312	0.10719775901925	5.67276569350496	0.261341864151254	1.00197168672395
509	2	B	EMS	EMS	1	1	1	6	C	5	C05	1	2	2	6	11	3	17384	13336	5977	5278	0.0430272150859592	56	5.65142727659637	0.0910995042371896	5.26736770242552	0.122192425809037	0.93221818328708	0.0127422987213176	0.0132942587100333	0.780471064895746	0.0268511140574607	0.0268446637879936	0.931976744086728	0.0125704197458528	0.0130687997986459	5.65158042401384	0.0911222419254865	0.976271558318868	0.0466700636467277	0.0488564508257609	-0.0240144952928562	0.0479020209933923	0.0497989317736661	0.208809744710869	0.102534185301106	5.67160238440516	0.264357967364811	1.00348862860378
510	2	B	EMS	EMS	1	1	1	6	C	6	C06	1	2	2	6	11	3	15803	12624	5313	4875	0.418437830191878	56	5.66310041152258	0.0801873223554931	5.29089121922266	0.110983494365547	0.93353222057148	0.0123715870155396	0.012968638525812	0.745967382004152	0.0331205214348122	0.0331084186718638	0.933595825113807	0.0122789326735172	0.0127254016798545	5.6630413998828	0.0802648366647416	0.982342848611044	0.0460549484985304	0.0482503670811853	-0.0178148985552801	0.047084149585556	0.0488445125368689	0.221470963676487	0.0999881872265623	5.68306336027412	0.277019186330429	1.0099067109548
512	2	B	EMS	EMS	1	1	1	6	C	8	C08	1	2	2	6	11	3	17255	13601	5919	5458	0.368485645583054	56	5.66806146651989	0.0854642255099826	5.2839781542496	0.117073297289999	0.93172506824515	0.0128190272353098	0.0131442429505609	0.782431585794811	0.0263394254512209	0.0263333368586935	0.931705057532378	0.0127067631202269	0.0129602177444503	5.66808029722574	0.0855160052997227	0.975260288766087	0.0471903188108924	0.0486079286881758	-0.0250508809132622	0.0482987719730196	0.0494683563497445	0.206685155511871	0.102229581506793	5.68810225761706	0.262233378165813	1.00241959534125
513	2	B	EMS	EMS	1	1	1	6	C	9	C09	1	2	2	6	11	3	17793	13335	5829	5189	0.122659964148694	54	5.63680372320117	0.0871815429906657	5.25476070125871	0.118585008370324	0.932029274087474	0.0131207293357032	0.0135730690721311	0.800142298771925	0.0233974751990567	0.0233932070152516	0.932005625905696	0.013016803224257	0.0134280456099519	5.63677033402506	0.0872006837163871	0.976379188409467	0.0483614359537902	0.0503282199146901	-0.0239042553059492	0.0495560764029889	0.0512238876101355	0.209035600606411	0.105599108666364	5.65679229441638	0.264583823260353	1.0036024065244
514	2	B	EMS	EMS	1	1	1	6	C	10	C10	1	2	2	6	11	3	17763	13353	5705	4828	-0.159102591300074	55	5.66256471651069	0.0932830598025414	5.30162779213618	0.129326341064751	0.935080510395679	0.0131713403603044	0.0137362490665047	0.777239159429713	0.0278745336906681	0.0278673176465907	0.934742330856874	0.0131005195366128	0.0134742908908343	5.662628653065	0.0933465353346018	0.986688785650455	0.0496271321648202	0.0516010240526886	-0.0134006027192073	0.0503252114217146	0.0519637317095261	0.230436642483239	0.105977250704766	5.68265061345632	0.285984865137181	1.01450088788737
515	2	B	EMS	EMS	1	1	1	6	C	11	C11	1	2	2	6	11	3	16981	13372	5808	5284	0.385607652599808	57	5.67315458651749	0.0846399714253993	5.29051207266717	0.119891512496341	0.932072316149861	0.012944346070618	0.0133199496702227	0.734735888638404	0.0347842500150507	0.034770231192065	0.932016724212481	0.0125949367452155	0.0130154648711516	5.67314224636961	0.084765781275239	0.976420553817022	0.0470405938708717	0.0488740406650672	-0.0238618902392247	0.0481467716597546	0.0497039035556832	0.209122390097929	0.102539037422521	5.69316420676093	0.264670612751871	1.00364613472374
517	2	B	EMS	EMS	1	1	1	6	D	1	D01	1	2	2	6	11	4	20661	16245	8070	7617	0.331250186274356	55	5.65254511792797	0.0851104003764779	5.2948055927727	0.133984839341404	0.936532656995908	0.0135927430665007	0.0137895100841561	0.546447438051431	0.0690105449503195	0.0689013037225291	0.936268088670947	0.012151168392359	0.0126139058734358	5.65266153060943	0.0853978015049563	0.992533074348687	0.046814830943526	0.0494503215689811	-0.00749494269524004	0.0471930894817946	0.0492464802460453	0.242368073536979	0.100355618901941	5.67536304241108	0.295038898165283	1.01918232910453
518	2	B	EMS	EMS	1	1	1	6	D	2	D02	1	2	2	6	11	4	17456	14086	5834	5417	0.415506613002663	56	5.65568096390368	0.0857534964325534	5.25764498173161	0.119486169405777	0.928882639574167	0.0132259905691688	0.0132462075023617	0.724915190550797	0.0360641716400118	0.0360485485153112	0.928818711763568	0.0129367545498122	0.0129170855319676	5.65546128995546	0.0859384814021982	0.964648373492241	0.0466618175501151	0.0471893160004562	-0.0359916238463886	0.0486344156011183	0.0486503748774235	0.184113921468116	0.101511609258749	5.67816280175711	0.236784746096419	0.989789550847542
519	2	B	EMS	EMS	1	1	1	6	D	3	D03	1	2	2	6	11	4	17725	14171	6100	5601	0.307741894233425	56	5.65625540158335	0.0801983082369447	5.28531646757891	0.115191441288382	0.934144088243697	0.0132121566365059	0.0129403714916389	0.75404407835266	0.0318408553193377	0.0318301013486352	0.934083944685931	0.0130403056281147	0.0127067112346285	5.6562228907326	0.0804526607775195	0.984188349341455	0.0490867634311319	0.0482750076344017	-0.0159379883144375	0.0500972381841887	0.0488365321398416	0.225288060345895	0.0996581176950788	5.67892440253425	0.277958884974199	1.01038629958943
520	2	B	EMS	EMS	1	1	1	6	D	4	D04	1	2	2	6	11	4	16076	12204	5252	4479	-0.119128104485045	55	5.66172373594669	0.0926045358428214	5.30015618528143	0.126812826324177	0.935564610946655	0.0131314128871581	0.0137750317492266	0.808887586962087	0.022374285622643	0.0223705531566578	0.935375832483497	0.0133502543937727	0.0136131964446958	5.66166538557567	0.0926137384971628	0.989106898263242	0.0510249123212191	0.0522536640321475	-0.0109528659777362	0.051614976989898	0.0525599208498579	0.235390627198261	0.106787295718245	5.68436689737732	0.288061451826565	1.01557085647417
522	2	B	EMS	EMS	1	1	1	6	D	6	D06	1	2	2	6	11	4	17402	12852	5338	4527	-0.112185202638454	55	5.66671074954095	0.0858597351590637	5.30157252475628	0.11809041001243	0.934727539192256	0.0127095289068214	0.0129077132072445	0.778220505771228	0.0276186733959743	0.0276116541819441	0.934558523366982	0.0128516256666066	0.0126900825032038	5.66674323335196	0.0858432008970555	0.985989420867973	0.048751416089703	0.0480140645825437	-0.0141096537798881	0.0495161046948016	0.0486650372142753	0.228999267202289	0.098752260259053	5.68944474515361	0.281670091830593	1.01228477776484
523	2	B	EMS	EMS	1	1	1	6	D	7	D07	1	2	2	6	11	4	17434	14046	5754	5354	0.469791543427373	55	5.65258714394243	0.0765239448274142	5.27146985532518	0.112125197341124	0.932394301746297	0.0127336652563443	0.0129153327449576	0.711895660457999	0.0390084461633812	0.038988678358761	0.932228490711416	0.0125057503632579	0.0125999974824814	5.6526080665214	0.0764979119413146	0.977210527747656	0.0469603602847327	0.0472726698963113	-0.0230531663581794	0.0480807663153446	0.0481139151295192	0.210778404469621	0.0990152124925894	5.67530957832305	0.263449229097925	1.00303109919193
524	2	B	EMS	EMS	1	1	1	6	D	8	D08	1	2	2	6	11	4	16034	12197	5743	5223	0.364448266197675	57	5.67961865354347	0.0796315468157501	5.37927831682683	0.107802462058154	0.946768697019673	0.0119833507494941	0.0118684746331549	0.763744439746715	0.0322247440255113	0.0322135965455853	0.946618975283899	0.0116880688341462	0.011605834805372	5.67964538073151	0.0796634045629674	1.03407697091996	0.0487565222017771	0.0484512306910763	0.0335092132769971	0.0470824068323071	0.0467590572006457	0.323312041105752	0.0906825800482847	5.70234689253316	0.375982865734055	1.0629730280307
525	2	B	EMS	EMS	1	1	1	6	D	9	D09	1	2	2	6	11	4	15709	13774	6107	5807	0.224116713085142	53	5.59312428435407	0.0849004324680611	5.18779700215385	0.11276173872459	0.927596258465561	0.0122624920696055	0.0122446871459002	0.698675353503212	0.0409289858984041	0.0409061543436141	0.927489009123366	0.0120836211760933	0.0118103812566692	5.59313657966582	0.08487885087769	0.959839609792415	0.0435681356044021	0.0431881008357214	-0.0409890816114264	0.0452371667114532	0.0445320905037053	0.173715642421187	0.0938754544013251	5.61583809146747	0.22638646704949	0.984720716656102
527	2	B	SHAM	SHAM	1	1	1	6	D	11	D11	1	2	2	6	11	4	17533	14441	6845	6255	0.320472854560817	55	5.66955209844951	0.0904805881363757	5.28813515797452	0.122457165807819	0.932091650321358	0.0125424156853602	0.0130505860831926	0.799438445708123	0.0233974751990572	0.0233932070152468	0.931867885740174	0.0124891507245133	0.0128603051283696	5.66944942260271	0.090498389074272	0.975866108534393	0.0462440344740991	0.0481884781003423	-0.0244298858583095	0.0476276783476634	0.0490651938963917	0.207958472056188	0.101218450371509	5.69215093440436	0.260629296684491	1.00161397027872
528	2	B	EMS	EMS	1	1	1	6	D	12	D12	1	2	2	6	11	4	17971	13521	5700	5105	0.171708410942544	56	5.66197350556572	0.0897524147692355	5.28321752847264	0.121821515438542	0.932643532541997	0.0131390303353955	0.0133420976871468	0.767574976738703	0.0291538905367591	0.0291456349698323	0.932410298332044	0.0131214322818537	0.0130939480765931	5.6618385089929	0.089969289140071	0.977889787503574	0.0487654890895694	0.0490921192949358	-0.0223583070116447	0.0502745398788734	0.0499721776395752	0.21220014031969	0.102680061786067	5.68454002079455	0.264870964947993	1.0037470950883
529	2	B	EMS	EMS	1	1	1	6	E	1	E01	2	2	2	6	12	1	17953	13938	5858	5245	0.104466960957917	56	5.67177155250544	0.0901131284148792	5.30350492323951	0.123981694128444	0.934612885819881	0.0135509163132243	0.0137894953446698	0.769258678828633	0.0291538905367591	0.0291456349698323	0.934560993093359	0.0135358272929801	0.013538358810907	5.67184218341956	0.0900703306465809	0.985998811209732	0.0513230656212509	0.0514696288723715	-0.0141001300498711	0.0522053071222093	0.0520215887920625	0.229018580470737	0.105857399631041	5.69776778614045	0.271701434583019	1.00720119531293
530	2	B	EMS	EMS	1	1	1	6	E	2	E02	2	2	2	6	12	1	17007	13384	5696	5205	0.244885430979024	55	5.65623815075157	0.0879382450706362	5.28735377271475	0.119423128687335	0.934414634046228	0.0133718135490643	0.01367634541884	0.789773774166005	0.0255719183006826	0.0255663464647635	0.934274484267006	0.0134521887612208	0.0134992641220264	5.65617991317743	0.0878653816137779	0.984910662302514	0.0509039218437503	0.0509314984724598	-0.0152043400934125	0.0519613459791107	0.051679962499192	0.226778080500475	0.10498558567581	5.68210551589832	0.269460934612757	1.00606559564132
532	2	B	SHAM	SHAM	1	1	1	6	E	4	E04	2	2	2	6	12	1	15969	12387	5531	4760	0.0215059776695137	55	5.65784289579928	0.0874626859260849	5.29295680237938	0.120096212223089	0.934927324146358	0.0123447942050722	0.0127042766802098	0.762016327558261	0.0305612933714501	0.0305517840253931	0.93478592696988	0.0121840099933047	0.0124255468451073	5.65770047784418	0.0874244781655873	0.986854811066909	0.0465045044963587	0.0472864896276177	-0.0132323516752613	0.0471990455193432	0.0477977091609627	0.230777564362798	0.0970830344984499	5.68362608056507	0.27346041847508	1.0080945226418
533	2	B	EMS	EMS	1	1	1	6	E	5	E05	2	2	2	6	12	1	16279	13115	5451	4862	0.155585841003431	55	5.65446484930884	0.0809326637240865	5.28983523557196	0.115485879098776	0.934967538341788	0.0130027005108752	0.0129915821097357	0.702811991577207	0.041057032442771	0.0410339860759383	0.934873812918601	0.0126358784328648	0.0125909488194129	5.65422106765322	0.081122036223884	0.987189675696299	0.0482675995361666	0.0481189593343498	-0.0128930840782342	0.0487224408354177	0.0485421805571676	0.23146483263898	0.0987242895665001	5.68014667037411	0.274147686751262	1.00844398966846
534	2	B	EMS	EMS	1	1	1	6	E	6	E06	2	2	2	6	12	1	16213	11982	5156	4335	-0.06566491393892	56	5.66548905718611	0.0928348575308159	5.29710145895058	0.131084986279317	0.935122645946323	0.0137034792247014	0.0143376082380806	0.739503056373628	0.034528279482699	0.03451456772742	0.93484470463482	0.013512906145066	0.0139643418414418	5.66542606742153	0.0929912972341005	0.987078741227367	0.0514005912454539	0.0535497820907292	-0.0130054643849156	0.0521936791508429	0.0538660070881746	0.231237205663885	0.109891564382278	5.69135167014242	0.273920059776167	1.00832821769493
535	2	B	EMS	EMS	1	1	1	6	E	7	E07	2	2	2	6	12	1	16259	12850	5908	5402	0.422715747841951	56	5.66423569111692	0.0830482028717735	5.31776778657487	0.120178458394812	0.938559912268021	0.0130376723238111	0.01328841509381	0.748782854895034	0.0335044422093186	0.0334919138688391	0.938382667044871	0.0126838285973081	0.0130204857597143	5.66429374155885	0.0828638617601497	1.00074894979439	0.0499346186882541	0.0510832368155274	0.000748669471128071	0.0497191364540027	0.0508452290717429	0.258904083420382	0.101969310708328	5.69021934427974	0.301586937532664	1.02259454122517
537	2	B	EMS	EMS	1	1	1	6	E	9	E09	2	2	2	6	12	1	16561	11507	5162	4235	-0.252157365875219	56	5.66758835694069	0.104136000412747	5.3029345377397	0.142298764744428	0.934775843017568	0.0142810650729844	0.0148303964616694	0.755765434683812	0.031584934730578	0.0315744378839746	0.93453563062995	0.0138768840928446	0.0144647978003391	5.66761086428247	0.104348691476821	0.985902387215282	0.0531896881185066	0.0546336508276083	-0.0141979280476652	0.0536530095821235	0.0553670495535119	0.228820245922944	0.112387120186285	5.69353646700336	0.271503100035226	1.0071005665702
538	2	B	EMS	EMS	1	1	1	6	E	10	E10	2	2	2	6	12	1	17883	13573	5875	5221	0.02967794252225	55	5.6579407584036	0.0803386031238896	5.28587897281497	0.116783755130813	0.933553448617368	0.0131409433877262	0.0132411784948885	0.740366840093545	0.0341443321471487	0.0341310725304546	0.933474306861187	0.0131296577553917	0.012958758438162	5.65779247693082	0.0804023818634011	0.981884501976416	0.0492909706677824	0.0488141364615158	-0.0182815926401687	0.0503149228747802	0.0495863558303591	0.220520690538842	0.10125264623054	5.68371807965171	0.263203544651124	1.00290747394517
539	2	B	EMS	EMS	1	1	1	6	E	11	E11	2	2	2	6	12	1	17792	14126	5009	4621	0.325043142970693	56	5.67897883298892	0.0697222201304351	5.27954603642376	0.104687079224271	0.929291783688535	0.0122013753221217	0.0125791111454287	0.675038313291572	0.0447709839874762	0.0447411063133284	0.929039061930346	0.0122981327834573	0.0122209826763283	5.67901734435484	0.0697193225331644	0.965450093124736	0.0445359942414504	0.0447604339004593	-0.0351608686362567	0.0464807454592884	0.0461045274471934	0.185837060501554	0.0961209309513752	5.70494294707573	0.228519914613836	0.985756412016822
540	2	B	EMS	EMS	1	1	1	6	E	12	E12	2	2	2	6	12	1	17569	13669	5611	5093	0.188821061705314	56	5.66377440066976	0.0852646594071362	5.27643882502131	0.120881386232782	0.931963714351923	0.0131242901726911	0.0136597305417067	0.731329057969917	0.0354241963377426	0.035409389853689	0.931635480728893	0.0131503402792818	0.0133340760035711	5.66375917916045	0.0853127752313638	0.975001655573189	0.048814432081411	0.0499157538429214	-0.0253161099619476	0.0500188737263034	0.0508385540539346	0.206141064098841	0.105037263366556	5.68968478188134	0.248823918211123	0.995724488176077
542	2	B	EMS	EMS	1	1	1	6	F	2	F02	2	2	2	6	12	2	17949	14434	6104	5577	0.31269409134059	55	5.65564833529325	0.0811376573306978	5.27699457946691	0.124403421141554	0.932648700390474	0.0132837573681901	0.013735673801818	0.716374946297571	0.0382403115029763	0.0382216879648181	0.932446618958594	0.0128557328695851	0.0133742987893285	5.65568452233758	0.0814242574484373	0.978025602462106	0.048150369327393	0.0504546852609314	-0.0222194309033566	0.0492294066587624	0.0511842146207656	0.212484167739508	0.105500007440101	5.67943385269307	0.251947918797782	0.997276234823223
543	2	B	EMS	EMS	1	1	1	6	F	3	F03	2	2	2	6	12	2	17196	13187	5571	4911	0.150402976386135	55	5.6544865040181	0.0827987434066496	5.29372707644518	0.119099516692424	0.935762916798916	0.01365415067526	0.0136428958880131	0.74269425148416	0.0341443321471475	0.0341310725304513	0.93560952135311	0.0134774532535285	0.0133554658544178	5.65443662636761	0.0829913186555128	0.990001931185525	0.0513187130467176	0.0513113997439713	-0.010048385162955	0.0518395878153127	0.0516050447448489	0.237218074932017	0.104670199419466	5.6781859567231	0.276681825990291	1.00973464419338
544	2	B	EMS	EMS	1	1	1	6	F	4	F04	2	2	2	6	12	2	17371	13696	6016	5298	0.0354367061978507	56	5.66267049111036	0.0890383582528536	5.29222394100061	0.124561869008025	0.93411591328206	0.01338372560912	0.0138830097150326	0.764680034201373	0.0299215501496475	0.0299126253637661	0.934000143319349	0.013398763873144	0.0136290884396731	5.66275651417692	0.0891019523353712	0.983871008947008	0.0506096397066912	0.0516963375537213	-0.0162604790119993	0.0514235352806387	0.0522985892307784	0.224632733467733	0.106791014007543	5.68650584453241	0.264096484526008	1.00335693522864
545	2	B	EMS	EMS	1	1	1	6	F	5	F05	2	2	2	6	12	2	16768	13811	6691	6102	0.49483304431811	55	5.66651798047318	0.0860161308621155	5.30393653451694	0.122178211967833	0.935594806152982	0.0119638598164842	0.0122640021389745	0.752992714716276	0.0322247440255113	0.0322135965455922	0.935060148817256	0.0115752107496098	0.0119188366780299	5.66653649422698	0.0860630689589136	0.987900417984353	0.0443979193961072	0.045644884979284	-0.0121733778717625	0.0448821778921784	0.0460020945309799	0.232921980063248	0.0935119421202113	5.69028582458247	0.272385731121522	1.00754853922235
548	2	B	SHAM	SHAM	1	1	1	6	F	8	F08	2	2	2	6	12	2	16908	13498	5617	5195	0.428176285919804	55	5.65280601698022	0.0782880526252685	5.28110384911422	0.112985507966367	0.934116374210972	0.0131460812319973	0.0133586897400191	0.69840970835367	0.0416972854099844	0.0416731447375543	0.933852739645321	0.0128298007696149	0.0130001938145827	5.65283639574378	0.0783804535006935	0.983313322535355	0.0484048987545697	0.0493913672400302	-0.0168274684874907	0.0492349735778288	0.0499493663036823	0.223480036163165	0.102147229583119	5.67658572609927	0.262943787221439	1.00277680038289
549	2	B	EMS	EMS	1	1	1	6	F	9	F09	2	2	2	6	12	2	17383	11873	5496	4244	-0.371692029542376	56	5.66693662948432	0.106119133703638	5.30362797619078	0.145248819579457	0.935002702011808	0.0146212637819404	0.0154157319286511	0.742959440595753	0.0338883728497827	0.0338754090658004	0.93465837043817	0.0144718707383437	0.0149424767722387	5.66674604190486	0.105976187906853	0.986369202054824	0.0553064326938776	0.05661396679398	-0.0137245502755847	0.0561118423639877	0.0572574758324405	0.229780071974554	0.116349108237224	5.69049537226035	0.269243823032828	1.00595568757935
550	2	B	EMS	EMS	1	1	1	6	F	10	F10	2	2	2	6	12	2	17414	12203	6107	4322	-0.470240484658315	55	5.65802237261289	0.111711122987959	5.27946731247687	0.155860121528294	0.932170721422669	0.0154534381642465	0.016973899046646	0.704940386428273	0.0401607346224509	0.0401391639496753	0.931762863666052	0.0157672900362835	0.0162914496952869	5.65815283440455	0.111871734410879	0.975475276439629	0.0584457795351237	0.0602658820702791	-0.0248304648695757	0.0600789296029902	0.0615992630374806	0.207137203835693	0.126690678845669	5.68190216476004	0.246600954893968	0.994623251062578
552	2	B	EMS	EMS	1	1	1	6	F	12	F12	2	2	2	6	12	2	17307	13388	5517	4908	0.0867054621680978	56	5.67408413197889	0.0834033784398847	5.30656976195715	0.121404038057611	0.934538278680913	0.0133283109679197	0.0133182786493981	0.767664751155362	0.0294097732152152	0.0294012984344755	0.934452689779257	0.0131886295201042	0.0130866136055434	5.67416553998219	0.0833863418817447	0.985587193172562	0.0500867037933738	0.0499456838866721	-0.0145176803247001	0.0509306616529182	0.0503956551497321	0.228171648596182	0.102810143813955	5.69791487033768	0.267635399654456	1.00514220065766
553	2	B	EMS	EMS	1	1	1	6	G	1	G01	2	2	2	6	12	3	17900	13753	5722	5046	-0.0349944397677948	56	5.67208630517892	0.0976848423260861	5.29733803990803	0.129190982873946	0.932909160373355	0.0137175717191615	0.0139286179881203	0.806725714830009	0.0222463902617514	0.0222427214243397	0.932681678571766	0.0138571797419851	0.0137562481797123	5.67204392303995	0.0978794251844698	0.978905502728118	0.051578584634552	0.051856137557131	-0.0213201656656046	0.052946768582812	0.0526303209763326	0.214322335833728	0.108231293380743	5.69581499460937	0.251784251539721	0.997194817997203
554	2	B	EMS	EMS	1	1	1	6	G	2	G02	2	2	2	6	12	3	18234	14624	6059	5724	0.439254816308568	56	5.66865517033866	0.076854125559424	5.29394122832391	0.113922968909532	0.933721359180704	0.0127569428512221	0.0132897042301639	0.686464534091853	0.0436182511828602	0.0435906207224104	0.933406211027113	0.0124748143820821	0.0128792827731585	5.66877890566323	0.0768855427245875	0.981627846193564	0.046839253528168	0.0485797758323966	-0.0185430178280141	0.0479151298503218	0.0493026310353004	0.219988180924482	0.100820197494441	5.69254997723265	0.257450096630475	1.00002108000496
555	2	B	EMS	PETITE	1	1	1	6	G	3	G03	2	2	2	6	12	3	1325	1023	568	518	-0.372853128858377	51	5.47425237626817	0.164470445701044	5.14996537901212	0.178974621344335	0.940304997687565	0.017238579212627	0.0202708602019052	0.919311399838139	0.00383497076978718	0.00383495196964323	0.940255336890125	0.0173297201335567	0.0202638488012885	5.47421282521494	0.164334918739506	1.00813923213162	0.0705349899712129	0.0768592468256942	0.00810628632855797	0.0691361498686828	0.0774690230304841	0.273548371332811	0.151191461977881	5.49798389678436	0.311010287038804	1.02754447071625
557	2	B	EMS	EMS	1	1	1	6	G	5	G05	2	2	2	6	12	3	16853	13737	5560	5145	0.330556180482383	55	5.6538981575407	0.0841170291834804	5.27934977504156	0.111278187688456	0.933239625230573	0.0128220633208521	0.0127748982812484	0.819029974604492	0.020200160569528	0.0201974137071556	0.933302689908607	0.0128251586173887	0.0126699761274924	5.65399512692931	0.0841672702609774	0.981237932851075	0.0480066214551026	0.0477893131709876	-0.0189403076925252	0.0490499797623593	0.0485169282828329	0.219178645401712	0.0992600302155071	5.67776619849873	0.256640561107704	0.999616282711681
558	2	B	EMS	EMS	1	1	1	6	G	6	G06	2	2	2	6	12	3	16239	12461	5280	4792	0.023378102967246	57	5.69637604944379	0.101479420570522	5.34030229544559	0.122538841607865	0.936494269547902	0.0130950321942116	0.0133983194716792	0.833810105296234	0.0180262263868086	0.0180242742576579	0.936119885494291	0.0131071821683357	0.0132713135619699	5.69646321556785	0.101467675287847	0.991962331897106	0.0504312119762288	0.0510843587627447	-0.0080701443363772	0.050792822903161	0.0513254626244258	0.241209124368535	0.10379199149557	5.72023428713727	0.278671040074528	1.0107500584327
559	2	B	EMS	EMS	1	1	1	6	G	7	G07	2	2	2	6	12	3	19042	14651	6545	6129	0.269218566397349	55	5.670119629499	0.0801280122403867	5.31415384445287	0.123120671231211	0.937148296426366	0.0132383532113302	0.013738988106157	0.632430542529018	0.0537409744076727	0.0536893275759995	0.936792135742454	0.0129515085484434	0.013083553625463	5.67016852713397	0.0801207365251632	0.99455653538405	0.0500790384252227	0.0504918243992815	-0.00545833425558362	0.0505384709390374	0.0506672148900979	0.246466123370454	0.102050203769732	5.69393959870339	0.283928039076446	1.01344328904398
560	2	B	EMS	EMS	1	1	1	6	G	8	G08	2	2	2	6	12	3	17261	13757	5591	5116	0.243637374736519	55	5.64069356317562	0.0806534591424182	5.26171120604303	0.113671793639888	0.932769829762224	0.0130291109007951	0.013368997382502	0.738006385936635	0.034528279482699	0.03451456772742	0.932708320130995	0.0130152954531113	0.0131049418784495	5.6408564855073	0.0803960368782124	0.979005331761209	0.0487218855562049	0.0494821846063758	-0.0212181903492096	0.0497594516714946	0.0501939067347095	0.214530671826732	0.103254994682524	5.66462755707672	0.251992587532724	0.997298457749893
562	2	B	EMS	EMS	1	1	1	6	G	10	G10	2	2	2	6	12	3	17647	13629	5935	5172	-0.00411136751894725	56	5.66541821733104	0.0911174509997988	5.29437031765543	0.122765149932895	0.934403381272723	0.013105165396701	0.013376042549132	0.796049824761812	0.0244207137414278	0.024415860873838	0.934017602616451	0.0128422543579987	0.0131956686066028	5.66538712887787	0.0911084275980032	0.983937107204974	0.048098080222082	0.0502315718948978	-0.0161932995577983	0.0491095256662554	0.0507429900110634	0.224769265734178	0.103751027718294	5.68915820044729	0.262231181440171	1.00241849118595
563	2	B	EMS	EMS	1	1	1	6	G	11	G11	2	2	2	6	12	3	17696	13858	5781	5231	0.269414524074993	56	5.66348608019172	0.0778511648056531	5.30427720577938	0.114409588664489	0.936317629785196	0.0130764244928685	0.0134418514218227	0.757436791594804	0.0315849347305778	0.0315744378839711	0.936192341101132	0.0131000898905334	0.0132166657696139	5.66338619195116	0.0779261650699645	0.992241281632032	0.0503954718165163	0.0510869909393993	-0.00778897382062044	0.0507967337388132	0.0512169844866153	0.241775727290345	0.103738544272333	5.68715726352058	0.279237642996338	1.01103965636474
564	2	B	SHAM	SHAM	1	1	1	6	G	12	G12	2	2	2	6	12	3	17714	13738	5921	5158	0.0251640503879971	56	5.67069290897633	0.0900661398305153	5.3049039446838	0.125746212020161	0.934764900670271	0.0129765075938267	0.013396711215222	0.741142878481703	0.0341443321471487	0.0341310725304579	0.934500597691904	0.0128114204175047	0.0130080115418334	5.6708809436132	0.0899441572284062	0.985769229254889	0.048808537939117	0.0494952864739722	-0.0143329992668814	0.0494040997651358	0.0500203463307397	0.228546288581928	0.101844865904943	5.69465201518262	0.266008204287921	1.00432054983835
565	2	B	EMS	EMS	1	1	1	6	H	1	H01	2	2	2	6	12	4	16202	11953	5340	4499	-0.252966108630301	56	5.67522366659713	0.106031942685168	5.31305690624418	0.142625743115261	0.935453672819333	0.0150927934621036	0.015620453170101	0.783793589084257	0.0267231905991137	0.0267168320556766	0.935345877973859	0.0150020090749949	0.0153515632461545	5.67524603476898	0.105911046651442	0.988992290127853	0.057516302243574	0.0590525915734723	-0.0110687430138224	0.0581795191736246	0.0592801663308751	0.235156382833764	0.120710078607694	5.69538539393751	0.270921726389388	1.00680571074572
567	2	B	EMS	EMS	1	1	1	6	H	3	H03	2	2	2	6	12	4	18055	14257	6029	5558	0.191213476154858	56	5.66122945006999	0.0865899878723328	5.28237963433669	0.128084983024572	0.932714153612072	0.0143857378626513	0.0148069834669519	0.722024695463003	0.0372162018881718	0.037199034106226	0.932629070020727	0.0141757641283653	0.0144504342475624	5.66129403145542	0.0867283255369521	0.978708431886147	0.0529162000114411	0.0546445974072553	-0.0215215032152356	0.0542136210228997	0.0553460606549474	0.213910935740238	0.114098144562885	5.68143339062395	0.249676279295863	0.996147390312014
568	2	B	EMS	EMS	1	1	1	6	H	4	H04	2	2	2	6	12	4	15077	10973	5130	4032	0.080354825465577	56	5.65181375672063	0.104057072234516	5.28733360340198	0.152334609753754	0.935016816636908	0.0139335471499204	0.0148376046746115	0.676911843860191	0.045667635892956	0.0456359284395987	0.934572043468606	0.0135528238796177	0.0140272323192715	5.65178916969571	0.103933159331561	0.986040828964169	0.0511528020434617	0.0531828659778788	-0.0140575165653606	0.0521511149040197	0.0537918789243761	0.229104994500587	0.109371556546994	5.67192852886424	0.264870338056212	1.00374677915693
569	2	B	EMS	EMS	1	1	1	6	H	5	H05	2	2	2	6	12	4	17860	13418	6090	5148	-0.159755389996592	56	5.66185336912084	0.103269176065104	5.32937143435255	0.138478223039496	0.940461066232494	0.0143173557529928	0.0145314564863258	0.786985412974169	0.0271069636128984	0.0271003272526502	0.940225031286751	0.014117679119981	0.0142629169220875	5.66207717749105	0.103327699117953	1.00801876995435	0.0563735572283749	0.0565938620861826	0.00798679004300712	0.0556192492903152	0.0559776581069635	0.273311379537024	0.111353378597054	5.68221653665958	0.309076723092648	1.02652499449604
570	2	B	SHAM	SHAM	1	1	1	6	H	6	H06	2	2	2	6	12	4	18162	13822	5867	5065	-0.082018889764313	55	5.65943983051225	0.0935086129683449	5.28521513921727	0.137106610290909	0.933742454385518	0.01446879181112	0.0150792522228909	0.711527372256795	0.0392645012198337	0.039244341823412	0.933449166239422	0.0143032711895742	0.0146014335213503	5.65944074882991	0.0938046918496108	0.981789730097847	0.0538254722952533	0.0553328179734513	-0.0183781176921288	0.0547870540204183	0.0559747875492501	0.22032409079344	0.114796577923809	5.67958010799844	0.256089434349065	0.999340886655528
572	2	B	EMS	EMS	1	1	1	6	H	8	H08	2	2	2	6	12	4	17424	13019	5649	4936	-0.0720945147601291	56	5.66273753260302	0.0978017623408214	5.29119118799443	0.132729211786521	0.934270769674391	0.0142106895224121	0.0142921970324461	0.772077867794068	0.0286421365896801	0.0286343080405304	0.934024423284669	0.013980922620199	0.0140171746580482	5.66271246584786	0.0976862808493867	0.983962931399622	0.0530787250311949	0.0528975918966176	-0.0161670540347053	0.053781426080725	0.0536532839092308	0.224822603011539	0.109251743461912	5.68285182501639	0.260587946567164	1.00159321990409
573	2	B	EMS	EMS	1	1	1	6	H	9	H09	2	2	2	6	12	4	18164	13700	5974	5202	-0.0689296110365603	55	5.64926668621729	0.0935993753515213	5.28988202314819	0.134889539164517	0.935978442275337	0.0145219289750762	0.0146292059361517	0.745979943760708	0.033632417987661	0.0336197456011557	0.935903997752161	0.0142281966438126	0.0142820443235507	5.64932517210542	0.0933464572248105	0.991132113469803	0.0550638691022831	0.0552531200116576	-0.00890744039165639	0.0554015506993848	0.0553483687734157	0.239520881930985	0.112451667484236	5.66946453127395	0.27528622548661	1.00902345065559
574	2	B	EMS	EMS	1	1	1	6	H	10	H10	2	2	2	6	12	4	17981	13606	6084	5183	-0.0396132687526936	55	5.66485624983451	0.0955854743837477	5.30196706007926	0.133423115737175	0.935596495393056	0.0145864679506724	0.0150387954879891	0.744348711537152	0.0337603948664171	0.0337475773334853	0.93517790250737	0.0146702506223033	0.0146709979813295	5.66524074384386	0.0955815604889768	0.988350100901876	0.0556637353613781	0.0559782150325689	-0.0117182908629643	0.056527933835226	0.0564412562559017	0.233842814129916	0.114576115111649	5.68538010301239	0.269608157685541	1.00614013772938
575	2	B	EMS	EMS	1	1	1	6	H	11	H11	2	2	2	6	12	4	17681	13094	5334	4693	-0.102124735072115	56	5.67031359030668	0.0911845550463558	5.29618676422584	0.134084587020017	0.933454866000166	0.0150621760712814	0.015237327878033	0.744925478971432	0.0332484939370941	0.0332362504041936	0.933332805319293	0.0147923773553078	0.0149286751728101	5.6703496491886	0.0915876204238868	0.981351330291647	0.0554651775467418	0.0561804298862111	-0.0188247486778828	0.0566331263218334	0.0570318951194197	0.219414148012938	0.116661188018834	5.69048900835713	0.255179491568563	0.998886523565068
578	2	C	EMS	EMS	1	1	1	7	A	2	A02	1	2	3	7	13	1	16740	13271	5502	4916	0.134656632136549	55	5.66606847784352	0.0850619007096924	5.2744626713951	0.117723653990702	0.930437368568347	0.0131156875542804	0.0132762503961648	0.751474965516675	0.0315849347305778	0.0315744378839746	0.930103819031593	0.0128538104227336	0.0129964826258618	5.6658923292693	0.0850644845815215	0.969343619890724	0.0471558698878284	0.0478103382330616	-0.0311361172980216	0.0486123076542709	0.0491212868381449	0.194163465565688	0.101819130704755	5.67819875647749	0.24353884198567	0.993110309394234
579	2	C	EMS	EMS	1	1	1	7	A	3	A03	1	2	3	7	13	1	17634	13394	6023	5271	-0.0129265156363831	56	5.6714181636868	0.0964203700274586	5.2900702443197	0.129719716596921	0.932182856265468	0.0129546476832293	0.0133453975995383	0.798035213533285	0.0236532801603503	0.0236488704798939	0.932005278477224	0.0127915864956106	0.0131304472693609	5.67147087206051	0.0963237960108587	0.976377893548706	0.0476179303382128	0.0490453530766883	-0.0239055814931876	0.0487731196731121	0.0500091783793166	0.209032883714611	0.1029076659	5.6837772992687	0.258408260134594	1.00050062037039
580	2	C	EMS	EMS	1	1	1	7	A	4	A04	1	2	3	7	13	1	16133	12297	5359	4865	0.213483732908171	56	5.65468949594338	0.0860283649821165	5.29867845056019	0.125909953779091	0.936269696563696	0.0134611635159888	0.0135608692954802	0.693243049367506	0.0429778942540584	0.0429514620607933	0.935929369776643	0.0130685436554099	0.0130807299110978	5.65494923773321	0.0857798356701262	0.991229611259936	0.0501921234714599	0.0504090834928077	-0.0088090749609498	0.0508078189359636	0.0506264181432788	0.239719290662554	0.102572685644397	5.6672556649414	0.289094667082537	1.01610405261552
581	2	C	EMS	EMS	1	1	1	7	A	5	A05	1	2	3	7	13	1	14714	11077	4653	4065	0.126554486179679	56	5.67110616552289	0.0838201656761848	5.29024836526466	0.1227562462824	0.932530594812035	0.0136268936997791	0.0143555986210239	0.737442864562196	0.0344002959133196	0.0343867359950962	0.932238393484102	0.0134344016777517	0.0140581054236033	5.67121800125602	0.0837461088327421	0.977247500930281	0.0498907584054714	0.0526824597223052	-0.0230153315594331	0.0511864394632386	0.0536012724856588	0.210855843839871	0.110337770620981	5.68352442846421	0.260231220259853	1.00141424262756
583	2	C	EMS	EMS	1	1	1	7	A	7	A07	1	2	3	7	13	1	16795	12956	5702	4985	-0.122352628773283	56	5.66506008817369	0.10132360179477	5.27935434026721	0.132151154487759	0.931219546508055	0.0136337860882658	0.0139131028758753	0.806641466400374	0.0219906017180204	0.0219870579596865	0.931134420918567	0.0136304965600346	0.0137270954321753	5.66514633905997	0.101467201849287	0.973143251388124	0.050643045014377	0.0507027493031171	-0.027223981129166	0.0519343389563175	0.0519725780723614	0.20222277472388	0.107112206146904	5.67745276626816	0.251598151143862	0.99710225792025
584	2	C	EMS	EMS	1	1	1	7	A	8	A08	1	2	3	7	13	1	17428	12873	5289	4576	-0.207243785744551	56	5.67379659605479	0.0942933976176263	5.27388863127525	0.128210379820515	0.929224032385398	0.0133813074877135	0.0136623499729969	0.813886841028327	0.0203280447940749	0.0203252454394806	0.929073504972798	0.0132313862957741	0.0135156448864473	5.67375398932061	0.0946159848141016	0.965575536465061	0.0482841442898138	0.0491169222351728	-0.0350309452096628	0.049964634960823	0.050743137261684	0.186106407909896	0.105447879238204	5.6860604165288	0.235481784329879	0.989151505734649
585	2	C	EMS	EMS	1	1	1	7	A	9	A09	1	2	3	7	13	1	15204	10111	4454	3185	-0.394733635494578	56	5.67149774751139	0.113767540355204	5.29158638726555	0.167044308850777	0.932361678207484	0.0148123241438096	0.0159675866172835	0.653738860397643	0.0491268497694632	0.0490873852123335	0.931741572802816	0.0139573303017903	0.0148452692471888	5.67144421632859	0.113889653344818	0.975396080432093	0.0519811969266254	0.0547366805561188	-0.024911654135324	0.0532541736586157	0.0560972826677013	0.206970704468023	0.115086375347467	5.68375064353678	0.256346080888005	0.999469113123865
586	2	C	SHAM	SHAM	1	1	1	7	A	10	A10	1	2	3	7	13	1	17553	13311	5699	4930	-0.0939024574404161	55	5.66897591317826	0.0976299595925375	5.28369462983891	0.133944344935969	0.931408170411079	0.0133201865680515	0.0138182917223986	0.755980853244322	0.0309451512677895	0.0309352792223558	0.931261222129143	0.0133600670782748	0.013458066824033	5.66891667896056	0.0977675754732829	0.973612862701927	0.0494877272215782	0.0499992412104018	-0.0267415260904092	0.0508403900521099	0.0511083652987877	0.203214361367881	0.105521323127837	5.68122310616875	0.252589737787864	0.997595638447604
588	2	C	EMS	EMS	1	1	1	7	A	12	A12	1	2	3	7	13	1	18044	13751	5598	4904	-0.0499404684485709	56	5.67415817191469	0.0914986578935673	5.28863035173212	0.128407321507663	0.931004224075208	0.0136208960971663	0.0137727625802797	0.795340275794097	0.0239090882155181	0.0239045339445402	0.930693272270512	0.0134910741000452	0.0135866096291634	5.67427507611269	0.0917904202826687	0.971513071493315	0.0496286116134664	0.0502204812629303	-0.0289005553065456	0.0510591120738027	0.051459444668929	0.19877299088301	0.106460021020018	5.68658150332088	0.248148367302993	0.995389567036232
589	2	C	EMS	EMS	1	1	1	7	B	1	B01	1	2	3	7	13	2	17750	13406	5742	5032	0.0476832170795896	56	5.67283598820874	0.0936305300451824	5.29670028254976	0.129247491875586	0.93328053865941	0.0136649033281344	0.013958897466788	0.73014661778367	0.0358081780079598	0.0357928850506613	0.932926380582747	0.0134924750832111	0.0135521309769912	5.67266572836094	0.0940136355408505	0.97982321756922	0.0506701692026798	0.0511281771241561	-0.0203831144897543	0.0518023894899341	0.0518663616749805	0.216235907996425	0.106507928455463	5.6874401309392	0.263062203135604	1.00283636647811
590	2	C	EMS	EMS	1	1	1	7	B	2	B02	1	2	3	7	13	2	16961	13130	5236	4821	0.496580763035016	56	5.66615185829328	0.0778809602741085	5.28713858902056	0.109843722390349	0.932772049536142	0.0125424388265497	0.0128660174432605	0.753807012918406	0.0315849347305778	0.0315744378839782	0.932644656701159	0.012359955939747	0.0126509762981299	5.66608014831471	0.0779916366347125	0.978766810712573	0.046203427933825	0.0475583254557013	-0.0214618561285092	0.0472438319587708	0.0483527930762915	0.21403282354176	0.0992898765649552	5.68085455089297	0.260859118680939	1.00172931551795
591	2	C	SHAM	SHAM	1	1	1	7	B	3	B03	1	2	3	7	13	2	16398	12789	5627	5031	0.200921946540941	56	5.66891774146293	0.0893078582084035	5.29494214605058	0.125201202832996	0.934080596741939	0.0133731576209595	0.0135543557244226	0.744146669883708	0.0335044422093196	0.0334919138688324	0.933767915137187	0.0132150320864721	0.013217544295186	5.66874399780119	0.089414383463828	0.982992689171705	0.0500243159813835	0.0498986596436322	-0.0171535961243721	0.0509035483175867	0.0506208407116358	0.222816708228839	0.103264846432204	5.68351840037945	0.269643003368018	1.00615778242562
593	2	C	EMS	EMS	1	1	1	7	B	5	B05	1	2	3	7	13	2	15462	12412	5451	4939	0.241179561443102	56	5.67121543667355	0.0895362594464361	5.29291144990247	0.116709579103994	0.932894930839725	0.0122537170389374	0.0126057502778167	0.810357408296821	0.0216069242847841	0.0216035627627094	0.932660784815433	0.0122928940531923	0.0124577547422244	5.67105703400467	0.089466037421548	0.978827224978076	0.045939254387915	0.0467119879689362	-0.0214001331518139	0.0469583983934785	0.0475620990709202	0.214158945448752	0.0975106367836666	5.68583143658293	0.26098524058793	1.00179262604099
594	2	C	EMS	EMS	1	1	1	7	B	6	B06	1	2	3	7	13	2	15840	12658	4768	4387	0.320989191762679	56	5.67109968247205	0.0725984172094692	5.3021923480181	0.102451036828752	0.934750285436842	0.01195011298703	0.0121269051312315	0.789729387681636	0.0255719183006832	0.0255663464647549	0.93471070051837	0.011745071497496	0.0119981434556324	5.67116809462832	0.0725421856809014	0.986568364459841	0.0447777269276269	0.0459645411736249	-0.0135226559106258	0.045428624110044	0.0463193880428473	0.230189293029762	0.0944244969854314	5.68594249720658	0.277015588168941	1.00990487544764
595	2	C	EMS	EMS	1	1	1	7	B	7	B07	1	2	3	7	13	2	15946	13220	5026	4686	0.385692821771402	55	5.65198607322406	0.0765808277151735	5.23152438215696	0.103827371318986	0.925299250036193	0.0131212646647977	0.0132213979177638	0.820524290868286	0.0185377242283507	0.0185356011869436	0.925154376259586	0.0130228877040974	0.0131556664750188	5.65201355377743	0.076685844988637	0.951516624346423	0.0460204173429665	0.046737012298326	-0.0496981212521355	0.0484879656000716	0.048825057709669	0.155458808267523	0.103461253093459	5.66678795635569	0.202285103406701	0.973172756280068
596	2	C	EMS	EMS	1	1	1	7	B	8	B08	1	2	3	7	13	2	16584	13300	5660	5143	0.175339862658352	55	5.66235261588801	0.0884358234389544	5.2799496908308	0.11692982344594	0.931088521719266	0.0119888857650506	0.0123359520969342	0.800776421225936	0.0230137734848386	0.0230097118182667	0.930823823282677	0.0120057596431415	0.0121580403365561	5.66242586867213	0.088610164332996	0.97199491186962	0.0441709437063013	0.0450006794233241	-0.0284047092374365	0.0456441742651345	0.0461204388436032	0.19979390018332	0.0952974704289933	5.67720027125039	0.246620195322498	0.99463277210855
598	2	C	EMS	EMS	1	1	1	7	B	10	B10	1	2	3	7	13	2	17458	13561	5848	5154	0.0210074129714566	56	5.66477309013272	0.0924731891383697	5.27935776415346	0.12856218861601	0.931231124361219	0.0133136767106877	0.0136906323363373	0.747960368852333	0.0323527090305027	0.0323414282779187	0.931180404469792	0.01306321202554	0.0133547162704382	5.66459575368665	0.0924076295266388	0.973313498822148	0.0484226473015606	0.0495858399774815	-0.027049050615722	0.0499144033773186	0.0507005550581459	0.202582366659481	0.104715015413405	5.67937015626491	0.24940866179866	0.996014572068162
599	2	C	EMS	EMS	1	1	1	7	B	11	B11	1	2	3	7	13	2	17645	14343	5185	4792	0.235436242461728	55	5.66257463404523	0.0710753526606598	5.2495444313972	0.105320909747299	0.926869451169731	0.012828116789201	0.0130031441423007	0.755987419578243	0.0301774444727122	0.0301682888284122	0.926921628724389	0.012945796402135	0.0128297322367838	5.66270045888458	0.070859214349573	0.95780289503907	0.046418040621683	0.0460429954241989	-0.0431132684914059	0.0485844158377855	0.0478805232611794	0.169278725848327	0.100526009652457	5.67747486146284	0.216105020987505	0.979760390544579
600	2	C	EMS	EMS	1	1	1	7	B	12	B12	1	2	3	7	13	2	17403	13611	5421	4823	0.155811387743055	55	5.66604786449813	0.0796329724664144	5.27948214710601	0.122180968827548	0.931195746753786	0.0135417590518909	0.0138393959860653	0.713073577460892	0.0384963513385735	0.0384773514294644	0.930978139939302	0.0132106895961884	0.01347918394289	5.66633263638787	0.0796348282509159	0.972565101756856	0.0489963807931176	0.0501616672719008	-0.0278182630495255	0.0502490987463971	0.0512300956288416	0.20100065694882	0.106098728035497	5.68110703896613	0.247826952087998	0.995230296876744
601	2	C	EMS	PETITE	1	1	1	7	C	1	C01	1	2	3	7	13	3	3503	3017	1345	1244	-0.272422035656511	51	5.49973378753559	0.155334872595987	5.12894986445834	0.177418081484883	0.931953454608074	0.0149809125209859	0.0151450260109737	0.770911177112601	0.0292818313970857	0.0292734667021492	0.931529470014985	0.0146220695965823	0.0145591380592002	5.49971919106962	0.155196471378733	0.974607866023631	0.0541367500753332	0.0555115542646511	-0.0257200806335728	0.0557261887578844	0.0560176219594155	0.205312072840206	0.116909331565589	5.5134708946274	0.251035093889921	0.996822317058231
603	2	C	EMS	EMS	1	1	1	7	C	3	C03	1	2	3	7	13	3	16920	13883	5780	5225	0.17234024325506	56	5.66458462985812	0.081618201261064	5.31118997156445	0.112427426150257	0.93680203351097	0.0124993921896893	0.0125217234153022	0.773106800756013	0.0288980116727565	0.0288899715051791	0.936657531564185	0.0123875947715554	0.0123143730354758	5.66450028952129	0.0818996902001732	0.994036007361539	0.0479764205288471	0.0476233005988318	-0.00598184827186444	0.0482772616119921	0.0477672501287066	0.245413518250929	0.0963539327048498	5.67825199307907	0.291136539300644	1.01715939298349
604	2	C	EMS	EMS	1	1	1	7	C	4	C04	1	2	3	7	13	3	20063	15570	7577	6860	0.39576479913762	56	5.64435536582224	0.0817861311564708	5.20766398207546	0.130554376003006	0.922196098560351	0.0143877684805128	0.0145742688539291	0.544998617713925	0.0668273799928395	0.066728164273024	0.921861299300404	0.0135751659307498	0.0136172125166729	5.64440000967709	0.0819453292510859	0.940032123606028	0.0466821083139623	0.0473678305168725	-0.0618412303062584	0.0495580523889621	0.0499720836255415	0.129706933223758	0.107593040179246	5.65815171323487	0.175429954273474	0.960628968117174
606	2	C	EMS	EMS	1	1	1	7	C	6	C06	1	2	3	7	13	3	15361	12520	5296	4892	0.308611970883217	55	5.66693148395089	0.0762636128909971	5.29476593928494	0.105186849640759	0.934302161912033	0.0123029742539454	0.0124134883883231	0.774889125914255	0.0281303976321657	0.0281229811112342	0.93418640314875	0.0123972037250009	0.0122372663721894	5.66696666688131	0.0762799790550357	0.984576623506602	0.0468395597214698	0.0464608631555261	-0.0155435540866876	0.0476465446581668	0.0470272211461127	0.226089285966193	0.0958362110020267	5.68071837043909	0.271812307015908	1.0072574572132
608	2	C	EMS	EMS	1	1	1	7	C	8	C08	1	2	3	7	13	3	15649	12767	5249	4742	0.333201495128901	55	5.6528871533439	0.0815740734083254	5.25541965720244	0.115490999218809	0.929798516931445	0.0127480019123025	0.0131827473455756	0.72810246909477	0.0356801829517088	0.0356650533183391	0.929894724514493	0.0125198669942297	0.0128822191806606	5.65258412461567	0.0818080718502889	0.968576457915732	0.0455880679252786	0.0474998773704881	-0.0319278547535339	0.0472650465740058	0.0487455879104183	0.192528345490116	0.101323499454243	5.66633582817345	0.238251366539832	0.990508732938517
609	2	C	SHAM	SHAM	1	1	1	7	C	9	C09	1	2	3	7	13	3	17178	12328	5433	4368	-0.322731282556103	56	5.68071660018474	0.0983443963961556	5.29797267496116	0.137956071131456	0.931577913327409	0.0141038681139397	0.0149363640167112	0.732524324926676	0.0350402251001677	0.0350258946567176	0.931231501989186	0.0139141449246836	0.0144839155045351	5.68080711148851	0.0984875019333917	0.973502751397924	0.0512379114636096	0.05363740729912	-0.0268546278811318	0.0527214008167972	0.054871515764736	0.202981949025799	0.113225833662836	5.69455881504629	0.248704970075514	0.995665500270756
613	2	C	SHAM	SHAM	1	1	1	7	D	1	D01	1	2	3	7	13	4	17167	13038	5621	4859	-0.0660072166248882	56	5.67671920938718	0.0916066629606667	5.30382219986285	0.130241110486363	0.933255327145916	0.0144252852443892	0.0145257019284216	0.74378649279281	0.0333764675271934	0.0333640821365082	0.933332458356215	0.0139715126067146	0.0141751747122166	5.67684878456279	0.0918100765572024	0.981350023674744	0.0527008461510612	0.0532419324968609	-0.0188260801253806	0.0536519917597293	0.0541207900651777	0.219411434760524	0.110559566077389	5.6932800395309	0.262257057784601	1.0024314977447
614	2	C	EMS	EMS	1	1	1	7	D	2	D02	1	2	3	7	13	4	15865	12714	5217	4685	0.184336961615301	55	5.65285334852821	0.0785488016204922	5.30167227632666	0.113948228159703	0.937855216700105	0.0127118116743046	0.0130365776820266	0.699251033582288	0.0422095123306076	0.0421844716668498	0.937673433252848	0.0126313246183242	0.0126527557850303	5.65270234837149	0.0787631140146081	0.997978173308688	0.04880322985977	0.0492592210005614	-0.00202387334201105	0.0490597843625969	0.0492311611896848	0.253357872818329	0.0988751838009839	5.6691336033396	0.296203495842406	1.01978757368347
615	2	C	EMS	EMS	1	1	1	7	D	3	D03	1	2	3	7	13	4	16787	14100	5429	5074	0.372080157868415	55	5.6362606579695	0.0773084095355817	5.22298034736163	0.105205071642829	0.926608006656494	0.0112546058191331	0.0114697412025981	0.746423420136197	0.0319688171741174	0.031957933080942	0.926705503388783	0.0110302908108824	0.0112280750854236	5.63624187172822	0.0776173511110775	0.957029448134867	0.0391812053549271	0.0402092519160617	-0.0439211169645054	0.0410498677452761	0.0418827378709279	0.167588626134604	0.0879376525363425	5.65267312669633	0.210434249158681	0.977046246514871
616	2	C	EMS	EMS	1	1	1	7	D	4	D04	1	2	3	7	13	4	15115	11369	5332	4208	-0.247709796024948	56	5.67168369470302	0.101217206979138	5.32732623275345	0.142673152935025	0.938882150698827	0.0135949000941886	0.0145178536818713	0.769176582594832	0.0299215501496475	0.0299126253637661	0.938874536314519	0.0135602817782681	0.0141556722125437	5.67172466107151	0.101509115211136	1.00267958887048	0.0527477334317415	0.0559532528334619	0.00267600509750689	0.0530746328416358	0.0554295363855422	0.262750503034411	0.111261762695425	5.68815591603962	0.305596126058488	1.02469480192633
619	2	C	EMS	EMS	1	1	1	7	D	7	D07	1	2	3	7	13	4	12586	10375	5230	4816	0.277913460899853	56	5.66788096396456	0.0969804044437719	5.34788399628378	0.133740418907131	0.942832057174841	0.013264426809756	0.0134546202549423	0.778316424137823	0.029025950630047	0.029017803237504	0.942469297258054	0.0129270836282856	0.0131531361516744	5.66803873211353	0.0969281615045432	1.01701713777847	0.0522813230843804	0.0532917272175005	0.0168739677747235	0.0513336782954218	0.052186633446588	0.290861546973492	0.103031950563043	5.68446998708164	0.333707169997569	1.03966000208998
620	2	C	EMS	PETITE	1	1	1	7	D	8	D08	1	2	3	7	13	4	2339	2042	1090	1018	-0.28734375521719	53	5.52933856973301	0.141603327883773	5.14408047465562	0.15195092832154	0.930759587888593	0.0147989783586832	0.0146981400633204	0.833914671667837	0.017514737974425	0.0175129473283592	0.929862795952146	0.0144220847630348	0.0145187078907883	5.52948915400756	0.141556447152556	0.968459424982224	0.0531183272827182	0.0543349565649461	-0.0320486927373811	0.0549021156928368	0.0553134883112706	0.192278667649757	0.115932566496612	5.54592040897567	0.235124290673834	0.988976590570485
621	2	C	EMS	EMS	1	1	1	7	D	9	D09	1	2	3	7	13	4	15761	13226	5103	4801	0.337951467480748	55	5.65674580517905	0.0772510236985004	5.28128114000268	0.105930596648884	0.933200495235099	0.0124955712667905	0.0124176767460249	0.78637587883804	0.0259556680561169	0.0259498416617288	0.933113672445425	0.0123859945367993	0.0122689298302873	5.65675435415573	0.0771832806902576	0.980526810509388	0.0463486667417944	0.0459883553568481	-0.0196652900078008	0.0473202094235003	0.0468410749072219	0.217700528214088	0.0956606727654049	5.67318560912384	0.260546151238164	1.00157224698462
623	2	C	EMS	PETITE	1	1	1	7	D	11	D11	1	2	3	7	13	4	15233	13041	5564	5214	0.250722664512554	54	5.60550113474997	0.0830742481332768	5.19014532967328	0.10571928902131	0.926281231687985	0.0111798695796929	0.011478010639166	0.773616026466969	0.0272348897183527	0.0272281589849686	0.926254726812117	0.0111438444988506	0.0112752663151426	5.60558762069021	0.0832386228267101	0.955420454677349	0.0395109843111423	0.0404325538294323	-0.0456037687700045	0.0415615443149803	0.0420899000566327	0.164063550915329	0.0887382723183959	5.62201887565832	0.206909173939406	0.975366816557333
624	2	C	EMS	EMS	1	1	1	7	D	12	D12	1	2	3	7	13	4	17165	12675	5232	4626	-0.0212369430136503	56	5.67331264391746	0.0918320754573746	5.29204884484678	0.126825279711069	0.932152348891506	0.013289170176571	0.0134339098652348	0.753687089278068	0.0314569759882308	0.0314466061516532	0.932057452642065	0.013068944079005	0.0131238931928326	5.67330761941497	0.0920320345586932	0.976572385358023	0.0486451874877428	0.0487752450494494	-0.0237064040925199	0.0501466189544933	0.0498677407049152	0.209440885984647	0.102299174537423	5.68973887438308	0.252286509008724	0.997444709962627
625	2	C	EMS	EMS	1	1	1	7	E	1	E01	2	2	3	7	14	1	17471	13653	6127	5394	-0.00990060530911085	56	5.66887445301663	0.0935014971669809	5.27858099166954	0.126372517976569	0.930862865302237	0.013105261836515	0.0133922783488044	0.761241354064244	0.0299215501496475	0.0299126253637661	0.93071559170268	0.0130991427273677	0.0131013528198175	5.66874791400479	0.0934184648935128	0.971595413752998	0.0483188335197395	0.0484607986832296	-0.0288158022253303	0.0498364538532286	0.049657523796477	0.198947529108921	0.102711824510477	5.69062838697392	0.26337386040662	1.00299317140834
626	2	C	EMS	EMS	1	1	1	7	E	2	E02	2	2	3	7	14	1	19432	15844	7694	7104	0.34921022952172	55	5.63642470003519	0.0952464145113508	5.25460244952915	0.130543763473292	0.932178965915973	0.0126496011527506	0.0129414407937782	0.701485818850848	0.0409289858983984	0.0409061543436087	0.931786713105119	0.0122084782824771	0.0123516085143679	5.63625081451613	0.0951834279243988	0.97556400051911	0.0453499342332686	0.0460970106295647	-0.0247395131680505	0.0465853598955486	0.0470398818086683	0.207323701823266	0.0968868671735893	5.65813128748526	0.271750033120964	1.00722585573471
628	2	C	EMS	EMS	1	1	1	7	E	4	E04	2	2	3	7	14	1	11922	8572	3531	2712	-0.395025456202985	56	5.68295377002284	0.128713882704844	5.30887481713362	0.175655758836524	0.934177993770152	0.0142103290429215	0.0155562545931922	0.668826841094456	0.0466924707491733	0.0466585822981844	0.932961612217548	0.0130486245906233	0.0142889570324729	5.68273324208325	0.128802596356098	0.979955492683363	0.0491633889465298	0.0539349526172055	-0.020248124675219	0.0500003324500598	0.0546422936637471	0.216511419632534	0.112323926629442	5.70461371505238	0.280937750930232	1.01190958854654
630	2	C	EMS	EMS	1	1	1	7	E	6	E06	2	2	3	7	14	1	17246	13103	5578	4625	-0.243865029802847	56	5.67032194074082	0.0999604525990959	5.26319800315477	0.135945334013832	0.927247598724384	0.0136553484129267	0.0144642668227566	0.740169218486754	0.0329925500161615	0.0329805869395387	0.926783833534563	0.0133379349544666	0.0140622759435739	5.67044433724691	0.100042863464866	0.957309616566645	0.0476783721608494	0.0504986271589718	-0.0436284115703671	0.0498749379072995	0.0524435985494071	0.168201166983018	0.110372892335559	5.69232481021604	0.232627498280717	0.987756697216391
631	2	C	SHAM	SHAM	1	1	1	7	E	7	E07	2	2	3	7	14	1	16334	13031	5658	5099	0.083506115379258	56	5.66177862188911	0.0890632983834413	5.26943822045966	0.118056455913276	0.930209541240142	0.0120855011038909	0.0124041706759495	0.843352132023767	0.0153410111940043	0.0153398078788541	0.93009948989578	0.0119520694694913	0.0123255810221389	5.66190995143323	0.089188211761228	0.969327723220438	0.0441870783254968	0.0454630886202289	-0.0311525166128582	0.0453058537662762	0.046665660531626	0.19412961070065	0.0968235961254641	5.68379042440236	0.258555941998349	1.00057457286435
633	2	C	EMS	EMS	1	1	1	7	E	9	E09	2	2	3	7	14	1	16898	12015	5434	4607	-0.153583186024954	56	5.65953020022471	0.0976444699259512	5.2672421488256	0.127076259652535	0.930778022335167	0.0124782605732768	0.0131431446822937	0.739710048017167	0.0337603948664174	0.033747577333482	0.930242186091942	0.0124498311369336	0.0127195109961006	5.65949559684653	0.097711643558106	0.969851974374612	0.0456335212612153	0.0466342846687456	-0.0306118228673569	0.0470582906002876	0.0479950497337821	0.195245495426883	0.0992071488778505	5.68137606981566	0.259671826724582	1.00113371136229
634	2	C	EMS	EMS	1	1	1	7	E	10	E10	2	2	3	7	14	1	17018	12372	5182	4711	0.213485065823996	56	5.67622157223461	0.0753807983858161	5.29680554559342	0.115615046471427	0.932558238347359	0.0123814602611203	0.0125829231900209	0.59329935016937	0.0597684364256466	0.0596974189952152	0.932556663584518	0.0119178035670401	0.0117873671826826	5.6764673460043	0.0754240135726282	0.978437331659543	0.0445078668429883	0.0443381781632897	-0.0217985395117179	0.0455058699559701	0.0450875440498481	0.213344717078418	0.0926307331150216	5.69834781897343	0.277771048376117	1.01029039845467
635	2	C	EMS	EMS	1	1	1	7	E	11	E11	2	2	3	7	14	1	15942	12750	4996	4514	0.239024805679804	55	5.64832292344377	0.0778920267422568	5.24500651860735	0.112738500185863	0.928344635264534	0.0128883110939723	0.0131585182885528	0.710904811529924	0.0384963513385735	0.0384773514294644	0.928187499285356	0.0127202737084315	0.0128360509601057	5.64836105615461	0.077999818389752	0.962359408945378	0.0456562044719488	0.0466374914998986	-0.0383672921177989	0.0476844932855446	0.0482049226297616	0.179177837801113	0.100820982911979	5.67024152912374	0.243604169098812	0.993142538149845
636	2	C	EMS	EMS	1	1	1	7	E	12	E12	2	2	3	7	14	1	19460	14835	5857	5208	-0.173466774291439	56	5.68125480790106	0.0967647086382824	5.27154771963988	0.126422829775648	0.926860521315299	0.0128197951472008	0.0135339871735607	0.70815294018638	0.0384963513385735	0.0384773514294615	0.926272098437842	0.0127367162479068	0.0130080510529467	5.68108026845769	0.0967913212020151	0.955482355559226	0.0452760077353928	0.0465297041151744	-0.0455389816968357	0.0474441494820966	0.0484517468732955	0.164199397002238	0.102105959132972	5.70296074142682	0.228625728299937	0.985807837463006
638	2	C	SHAM	SHAM	1	1	1	7	F	2	F02	2	2	3	7	14	2	16540	13163	5645	5092	0.0738209822608145	56	5.67193565050424	0.0893254722488178	5.29642933499874	0.11967451089682	0.933319954275322	0.0127245787781991	0.0129852559710535	0.776668616021062	0.0276186733959743	0.02761165418194	0.933075532357008	0.0128772306769935	0.0127458995098937	5.67222060816388	0.0895214644000584	0.980383447156474	0.0484952363663377	0.0478896381681277	-0.0198115112635612	0.04939751661268	0.0487044829212543	0.217402272710974	0.0996452586436154	5.69192480876762	0.278609500954665	1.01071861488633
639	2	C	EMS	EMS	1	1	1	7	F	3	F03	2	2	3	7	14	2	16320	12517	5587	4771	-0.0903500821638308	56	5.66702405048889	0.101209666079612	5.30334511800236	0.128000579674579	0.934640167568672	0.013121559605882	0.0135330002339403	0.827412399618245	0.0189213539584637	0.0189190963839298	0.934318116842243	0.013071628638547	0.0133921305125665	5.66702544746311	0.101184122315501	0.985076219724803	0.0494197313618304	0.0507128016861514	-0.0150362603724874	0.0503528249375841	0.0513585410393723	0.227119287383229	0.104499121991926	5.68672964806685	0.28832651562692	1.01570759150348
643	2	C	EMS	EMS	1	1	1	7	F	7	F07	2	2	3	7	14	2	16138	12727	5364	4864	0.179426109798236	56	5.66653435894885	0.0878840581118263	5.28029489382045	0.114292757233758	0.931025375452962	0.0123063095793659	0.0125381816206418	0.807864293517559	0.0217348160504668	0.0217313944950385	0.930936385105499	0.0124272212175318	0.0123953364146585	5.66647166315876	0.0879777274558972	0.972410753000613	0.0457470125519256	0.0459691554967709	-0.0279769786510685	0.0470742331062796	0.047057352965144	0.200674135097729	0.0972627503693789	5.6861758637625	0.26188136334142	1.00224269065601
644	2	C	EMS	EMS	1	1	1	7	F	8	F08	2	2	3	7	14	2	15995	12360	5254	4664	0.0402592749086148	56	5.68056393234927	0.096163022689661	5.2892633320127	0.123743297301154	0.93027131725509	0.0122615715948383	0.0128012361567567	0.835135945269874	0.0167475224499185	0.0167459569344272	0.930135576734796	0.0123996748233056	0.0126910125439591	5.68060782562695	0.0960638531628381	0.969460247344853	0.0454285068520754	0.0464936936290156	-0.0310158084182775	0.0468672399682757	0.0478710487219895	0.194411810002522	0.0989905560161809	5.70031202623069	0.255619038246212	0.999105951444585
645	2	C	EMS	EMS	1	1	1	7	F	9	F09	2	2	3	7	14	2	17198	12060	5313	4382	-0.165073797370842	56	5.65721509679565	0.0911241185999653	5.26781681732724	0.126252262432505	0.931077926027197	0.0125948023439505	0.013218088779629	0.727055149771921	0.0360641716400069	0.036048548515302	0.93071346733855	0.0121919419403601	0.0128086613763972	5.65732755754748	0.0914312219838635	0.97158757690248	0.0451646999524352	0.0476211167731028	-0.0288238687674982	0.0464716438544498	0.0486684180904107	0.198930918901866	0.100933809744747	5.67703175815122	0.260138147145556	1.00136755634136
646	2	C	EMS	EMS	1	1	1	7	F	10	F10	2	2	3	7	14	2	16998	12058	5030	4023	-0.393085050229568	56	5.67514384511133	0.0938352992804808	5.29946153520503	0.127400555200578	0.932940310305899	0.0127984332775021	0.0136088062973482	0.747155337210928	0.0327366104129695	0.0327249234748925	0.932574826675323	0.0129068912358439	0.0132342508053397	5.67543900682819	0.0939167366679972	0.978505322479219	0.0483163918029575	0.0497341721877795	-0.0217290527339021	0.0494385681786905	0.0505537540901629	0.213486752508622	0.103889215187885	5.69514320743193	0.274693980752313	1.00872194448253
648	2	C	EMS	EMS	1	1	1	7	F	12	F12	2	2	3	7	14	2	14941	11535	4493	3999	0.178509594338218	56	5.64930077596927	0.0814823053506532	5.25965359624347	0.106818781151623	0.930450726135621	0.01252687996183	0.0129810338492222	0.844507068143061	0.0152131496269667	0.015211976146525	0.930178628969928	0.0124256751447924	0.0129268502113384	5.64924926427651	0.0815461208246187	0.969618399787604	0.0455333612205254	0.0476862079281728	-0.0308526871685079	0.0469345748536741	0.0489270248682522	0.194748478522396	0.101495383520576	5.66895346488025	0.255955706766087	0.999274086342951
649	2	C	EMS	EMS	1	1	1	7	G	1	G01	2	2	3	7	14	3	17487	13307	5732	4978	-0.0782004866585342	55	5.66550735026847	0.096360156057154	5.27791735090306	0.130675380819425	0.930996826274749	0.0138841681803285	0.0140989538035971	0.770899044395884	0.0282583309809454	0.0282508128435633	0.930611842883983	0.0136161902526618	0.0138200140127978	5.66535893603525	0.0962339654907369	0.971212779199663	0.0500444625088632	0.0508705809534025	-0.0292097006089617	0.0516241915247779	0.0522236170719314	0.19813621276401	0.107906827414944	5.68508487785291	0.257341605655418	0.999966811542162
650	2	C	EMS	EMS	1	1	1	7	G	2	G02	2	2	3	7	14	3	16147	12668	5095	4411	-0.0915125221854844	56	5.69259930965883	0.105717382062314	5.31454764395139	0.126026959854153	0.933284490924383	0.0125029857668255	0.0129919216196387	0.883799996039273	0.00869277674280498	0.00869255779801035	0.932997102219983	0.012477027743262	0.0129579995860703	5.69257239513062	0.105686794440139	0.980088773213836	0.047153977007171	0.0487414971394712	-0.0201121265080072	0.0480195401680479	0.0495283091435983	0.216788948665354	0.101479965545448	5.71229833694828	0.275994341556762	1.00938418029132
651	2	C	EMS	EMS	1	1	1	7	G	3	G03	2	2	3	7	14	3	17494	11003	6361	6069	0.787141463641772	59	5.73703671413264	0.0772658301502586	5.67376806199174	0.121703793102263	0.989488256530529	0.0117700520940979	0.0117517092273994	0.683380748127135	0.0533563795485791	0.0533058323790216	0.989568364930074	0.0110805489221007	0.0111336884008595	5.73719588937836	0.0775660527365503	1.24734033527406	0.0648289739424479	0.0643434168277361	0.221013552696144	0.0518992020180998	0.0518276774915876	0.659176410276638	0.0860714525784534	5.75692183119602	0.718381803168047	1.29293625397363
653	2	C	EMS	EMS	1	1	1	7	G	5	G05	2	2	3	7	14	3	19361	15707	6402	5963	0.209221297473896	56	5.66960135720699	0.0838304598765852	5.28824698924037	0.114237127113754	0.932115666031485	0.0123751215168551	0.0124496819294836	0.755218084913779	0.0312010615866035	0.0311909426870073	0.931881061156231	0.0121635964983833	0.0121680378273022	5.66951913082377	0.0837035918901249	0.975915162844807	0.0455613294771915	0.0452668096870609	-0.0243796196618415	0.0465890329958248	0.0462773310939535	0.208061503853361	0.0950717777335428	5.68924507264143	0.26726689674477	1.00495600832571
654	2	C	EMS	EMS	1	1	1	7	G	6	G06	2	2	3	7	14	3	17909	14040	5729	5231	0.148084500606015	56	5.68376276373754	0.0905625459479201	5.29604620874121	0.113344329361659	0.931120126014371	0.0122549504523084	0.0124600777583556	0.841018489835892	0.0158524625189017	0.0158511348081465	0.930967467578802	0.0121956344810514	0.012376042772373	5.68387026861471	0.0905995610625568	0.972525645935659	0.0450730206101802	0.0461241371240309	-0.0278588326951827	0.0461453586358835	0.0471022109016306	0.200917199054397	0.0975669466892362	5.70359621043237	0.260122591945805	1.00135975414123
655	2	C	EMS	EMS	1	1	1	7	G	7	G07	2	2	3	7	14	3	21854	18031	8961	8697	1.05160133753072	53	5.61363043492524	0.0658996803877419	5.19287675707962	0.141545090638257	0.924579811800632	0.0180226843421614	0.0176341177633054	0.169464521414903	0.134514606748562	0.133711992010698	0.924675194674222	0.0155572726929929	0.0157438930941656	5.6136093206924	0.0666528849491897	0.949827050704745	0.0549123732951325	0.057797352550781	-0.0514753628507497	0.0578288292643081	0.0593714245843619	0.151711604116768	0.128425753835877	5.63333526251006	0.210916997008177	0.977276700340588
656	2	C	EMS	EMS	1	1	1	7	G	8	G08	2	2	3	7	14	3	16201	13164	5651	4991	0.0110043510325744	55	5.66196593889952	0.0992973780710066	5.27455730882439	0.126120326972364	0.930817840104594	0.0122373072326912	0.0132312989581566	0.809928396425451	0.0213511428686976	0.0213478992980864	0.930516512457529	0.0123140081780233	0.0130535636252921	5.66203585144457	0.0994734881385708	0.970861466073814	0.0455606196641828	0.0479629148563933	-0.029571492266034	0.0467548198897444	0.0492907617573771	0.197390728513637	0.10181495061107	5.68176179326223	0.256596121405045	0.999594070726062
659	2	C	SHAM	SHAM	1	1	1	7	G	11	G11	2	2	3	7	14	3	17077	13173	5715	5126	0.206422827623558	56	5.67685540891478	0.0830234347258392	5.29599129180851	0.117112700164812	0.932412302065797	0.0120826089460649	0.0126734202635384	0.740032909354187	0.0338883728497827	0.0338754090658004	0.932133285216598	0.0118387810358753	0.0123582599564335	5.67696442492277	0.0832273384985675	0.976855210987378	0.0441368607633791	0.0462409067064645	-0.0234168354817066	0.0452452679733373	0.0471252883768654	0.210033896855197	0.0969262631115493	5.69669036674043	0.269239289746605	1.00595339295513
660	2	C	EMS	EMS	1	1	1	7	G	12	G12	2	2	3	7	14	3	17333	13258	5586	4826	-0.0192175146904865	56	5.66322067505144	0.0933086033153951	5.28342900977126	0.132479390916141	0.931964482571185	0.013734216353067	0.0142917938974804	0.72989973278945	0.0356801829517088	0.0356650533183391	0.93167706739514	0.0134738513583318	0.0138711339629213	5.66321906459136	0.0935780270847605	0.975156226056681	0.0500106682227611	0.0518179870268785	-0.0251575890854327	0.0515090567236285	0.0528054772009197	0.206466272464742	0.109004660230592	5.68294500640902	0.265671665356151	1.00415078160072
661	2	C	EMS	EMS	1	1	1	7	H	1	H01	2	2	3	7	14	4	18771	13623	5949	4980	-0.275690951407175	56	5.66830808766291	0.109705149709409	5.29868498967283	0.155979861207207	0.933894191422667	0.0152206367606981	0.0160581373089084	0.742529872158662	0.0337603948664171	0.0337475773334787	0.933403949160382	0.0150053721231533	0.0155835685727834	5.66843262485006	0.109966773116676	0.981619325596961	0.0566484144854495	0.0586578779934987	-0.0185516989941767	0.0575398556643694	0.059499946194076	0.219970497519957	0.12173797267207	5.68452685426683	0.277479318260998	1.01014148955324
663	2	C	EMS	EMS	1	1	1	7	H	3	H03	2	2	3	7	14	4	17671	14282	6203	5730	0.186549259632193	55	5.66168729895813	0.092267307410279	5.29493664058762	0.124052101813511	0.934349176371251	0.0125205214923649	0.0127177340590196	0.801879988209064	0.0233974751990567	0.0233932070152468	0.934214514049951	0.0124544295178734	0.0125323458977585	5.66166999965051	0.0924508056606418	0.984683207033411	0.047239747649848	0.0475256591777211	-0.0154353071586531	0.0479734823062193	0.0481227085092145	0.226309114828258	0.0980110495546139	5.67776422906728	0.283817935569299	1.01338673626711
664	2	C	EMS	EMS	1	1	1	7	H	4	H04	2	2	3	7	14	4	15450	12377	5727	5229	0.280650995350305	56	5.66163287500406	0.0972653543205956	5.22050295947675	0.124133393980066	0.921445217748408	0.013852805769535	0.0145815236744368	0.844000599860021	0.0136788484167354	0.0136779953586473	0.92121516614041	0.0139553256694953	0.0145259059657286	5.6617295630753	0.0972615971307029	0.937813255075101	0.047735471952018	0.0507653116726218	-0.0642044382027158	0.0509090552131781	0.0534020156926355	0.124654169531652	0.115894314047359	5.67782379249207	0.182162990272693	0.963742335618105
665	2	C	SHAM	SHAM	1	1	1	7	H	5	H05	2	2	3	7	14	4	17531	13750	5590	4994	0.0697833019299048	55	5.66753046513825	0.0916543928741191	5.28386634562988	0.11816267158468	0.931877381637224	0.0126848219404043	0.0129700499549295	0.821016239229143	0.0195607492698985	0.0195582550455308	0.931491296450575	0.0127489146743112	0.0128436269281241	5.66756192933341	0.0916068409507619	0.974466137335676	0.0472125444957658	0.0475520761752785	-0.0258655093960396	0.0483006758603647	0.0487122878980777	0.205013542565748	0.100176285377587	5.68365615875018	0.262522363306788	1.00256487107757
666	2	C	EMS	EMS	1	1	1	7	H	6	H06	2	2	3	7	14	4	17503	13459	5598	4858	-0.0135105725786575	56	5.66363356212541	0.0948352623816446	5.28339507201412	0.125624386374136	0.932445571017226	0.0124677367267379	0.0129443520414566	0.804277098665203	0.0226300785434156	0.0226262166213084	0.932209193307758	0.012571899831857	0.0127647967712743	5.66357777343789	0.094816982628979	0.977138486601903	0.0469164579965935	0.0475867193383995	-0.0231268903425925	0.0481501184227195	0.048578210586001	0.210627498933684	0.0996880487010235	5.67967200285466	0.268136319674725	1.00539540902573
668	2	C	EMS	EMS	1	1	1	7	H	8	H08	2	2	3	7	14	4	17416	13172	5899	5118	-0.0714773534888047	56	5.67174195956859	0.10550215603864	5.28653505743977	0.134570694907391	0.931659626094877	0.0132639151138035	0.0139282396237914	0.790249758851587	0.0249323520448109	0.0249271878031311	0.931168269514553	0.013556021468967	0.0136789592701476	5.67189454373744	0.105733059137626	0.973268565326765	0.0502087910128639	0.0504769316239282	-0.0270952173283255	0.0517784655437371	0.0517600498086792	0.202487471929107	0.106606932212953	5.68798877315421	0.259996292670147	1.00129640925646
669	2	C	EMS	EMS	1	1	1	7	H	9	H09	2	2	3	7	14	4	14377	9672	4062	3010	-0.370040859176259	56	5.66061554330333	0.120297309802554	5.27081736675105	0.179608676409181	0.930779388799782	0.0157269571127447	0.0164622628451861	0.605522915914743	0.0574595590173629	0.0573964478133927	0.92927155765224	0.0136356312766807	0.0148418854189629	5.66094587667013	0.120448554224018	0.966297502827439	0.0500422934765456	0.0535817281610851	-0.0342835185846529	0.051714482880037	0.0554672728337072	0.187655179284518	0.11485523593782	5.6770401060869	0.245164000025559	0.993912697406837
670	NULL	C	NULL	NULL	1	1	1	7	H	10	H10	2	2	3	7	14	4	17952	13724	5668	5455	-0.0518893078304412	56	5.67297941204325	0.095366434358164	2.91328390176042	0.192271235462732	0.513009424249096	0.032377828245545	0.0346847565575929	0.589158609787143	-0.0134231380033548	-0.0134223318939964	0.513170412958517	0.0321784264941327	0.0346624432468695	5.67324666792156	0.0953035775997683	0.51780030536453	0.00461002525558129	0.00465263888778075	-0.658165621930363	0.00889717429290761	0.00897582264774005	-3.06625715074445	0.25821983388021	5.68934089733833	-3.00874833000341	0.518866881686554
671	2	C	EMS	EMS	1	1	1	7	H	11	H11	2	2	3	7	14	4	20162	15653	6525	6005	0.237756842746281	55	5.63459716322346	0.0753044579067859	5.23451728351269	0.110398970128429	0.928493678781603	0.012054023346932	0.0119760679654266	0.674062009902279	0.0451552544944967	0.0451246015102981	0.928511316207103	0.0113928662467356	0.0115319849897057	5.63465833417468	0.07525474881626	0.963532254211806	0.041288359638396	0.0418272943501972	-0.0371493155989713	0.0427194130398544	0.0432967221944459	0.181710087199259	0.0901936110309537	5.65075256359145	0.2392189079403	0.990983760968184
675	2	D	EMS	EMS	1	1	1	8	A	3	A03	1	2	4	8	15	1	15720	12309	4894	4635	0.535091325552908	55	5.65490489070241	0.0766518367607289	5.2542023406908	0.109055581316043	0.928617939747329	0.0117280231108138	0.0120464062188998	0.710924734288628	0.038496351338574	0.0384773514294644	0.928373554281132	0.0113281218084654	0.0117244291818765	5.65486712219537	0.0769216608372255	0.963032925856572	0.0411025400222328	0.0428451923984943	-0.0376676768478723	0.0427242751807496	0.0441885153073328	0.180632788482251	0.0924881227429927	5.68121772396915	0.245894312630821	0.994273698962673
676	2	D	EMS	EMS	1	1	1	8	A	4	A04	1	2	4	8	15	1	17146	13977	5802	5363	-0.0568221230965156	53	5.58758525953617	0.100209920067739	5.09417753999649	0.125905599180883	0.911381809782919	0.0120686827908752	0.0121492122813936	0.761348920673331	0.02685111405746	0.0268446637879936	0.911046055704271	0.0115988677870908	0.0118677814839732	5.58748335140373	0.100167471997538	0.904328959336751	0.0367163839460938	0.0378776897048902	-0.100562091711359	0.0404994158430493	0.0416098578831613	0.0451316922671337	0.0936299362096283	5.61383395317751	0.110393216415703	0.931610845617253
677	2	D	EMS	EMS	1	1	1	8	A	5	A05	1	2	4	8	15	1	16418	12256	4837	4402	0.340753389319432	55	5.64814720307077	0.0786657103583351	5.25424829355597	0.10845291928576	0.929789495383686	0.0121702704602658	0.0123022168098156	0.714525651648599	0.0381122934646698	0.038093856232498	0.929538664644055	0.0118202954332801	0.0119630605511971	5.64806988318604	0.0786998972917321	0.967272967303042	0.0433694640492705	0.0439620620275299	-0.0332745407340574	0.0449262380871684	0.0452139068819237	0.18974395537956	0.0940383482569085	5.67442048495982	0.25500547952813	0.99879968095486
679	2	D	EMS	EMS	1	1	1	8	A	7	A07	1	2	4	8	15	1	21117	15616	7712	7282	0.258389167751309	54	5.61302582901209	0.0893183861681853	5.18707774014643	0.131479194184329	0.924068407932701	0.0130984267149339	0.0133464018627218	0.576343559089834	0.0619496256449738	0.0618705584447217	0.923752450543468	0.0121331346744568	0.0122956670544659	5.61287646983651	0.0895206789377797	0.94659127745176	0.0422617658014472	0.0432635378203992	-0.0548878761877843	0.0446839702522968	0.0454253135048393	0.144495742081774	0.0968277895104932	5.63922707161029	0.209757266230344	0.976723256227261
680	2	D	EMS	EMS	1	1	1	8	A	8	A08	1	2	4	8	15	1	14691	10406	4642	3829	-0.248877951093915	55	5.6343966511737	0.103540488487696	5.20856764896901	0.145012572396127	0.92469224962304	0.0121072050155803	0.0125210624005705	0.629839371545184	0.0523308698929521	0.0522831785204341	0.92381758084651	0.0110775293531843	0.0112194741710052	5.63428056700212	0.103563011401444	0.946818903808451	0.0386519176117171	0.0393546762587722	-0.0546474355419943	0.0409360021230692	0.0413978443194467	0.145005061145849	0.088034547576516	5.6606311687759	0.210266585294418	0.976966233284051
681	2	D	SHAM	SHAM	1	1	1	8	A	9	A09	1	2	4	8	15	1	16350	11747	4685	4245	0.108271834150763	56	5.65631481587062	0.080191963945072	5.26005468402992	0.107363272772716	0.929756892791241	0.0116309073264075	0.011842440243549	0.790902157847357	0.0245486221089183	0.02454369260616	0.929531567855923	0.0115269799850521	0.0116862120686111	5.65630013217284	0.0805203088981759	0.96724702372842	0.0419128510553701	0.0426748944200277	-0.0333013624510455	0.0436251657528108	0.0440287613048461	0.189688458469472	0.0912900605143258	5.68265073394662	0.254949982618042	0.998771987793594
682	2	D	EMS	EMS	1	1	1	8	A	10	A10	1	2	4	8	15	1	22305	18064	12041	11336	0.0435138610169772	52	5.52814893965342	0.124809779724072	4.98261717363155	0.153275590031561	0.90016737666857	0.0127640300600821	0.0128265670885465	0.712827404232431	0.0338883728497886	0.0338754090658037	0.899719823242449	0.0121109696974676	0.0121925006487887	5.52828081321042	0.124883370929122	0.87003875114959	0.0352158069976521	0.0357134898487309	-0.139217526855543	0.0404205809458416	0.0407371811886955	-0.0434394826184871	0.0964560579144069	5.5546314149842	0.0218220415300824	0.895008169270153
684	2	D	EMS	EMS	1	1	1	8	A	12	A12	1	2	4	8	15	1	17755	12754	5504	4745	-0.150568932148398	56	5.66036451781749	0.0979542848687324	5.25900582173578	0.129370040353089	0.927931991942577	0.0125209174337116	0.0130575209106029	0.770151970489209	0.0278745336906685	0.0278673176465827	0.927565237319001	0.0125835637995366	0.0127486630437256	5.66021633709189	0.0981383432626876	0.960113933966394	0.0453669006058453	0.0458802828869466	-0.0407033203473196	0.0472225167280249	0.0476463903937115	0.174311747163325	0.0996678632173805	5.68656693886567	0.239573271311895	0.991157855663245
685	2	D	EMS	EMS	1	1	1	8	B	1	B01	1	2	4	8	15	2	16004	11677	5079	4199	-0.229745760041516	55	5.64125294079638	0.113722093336587	5.24626462904134	0.129229140332494	0.929044937924817	0.0114689422688264	0.0120846819130073	0.859812873435243	0.0122724623795721	0.0122718463030882	0.928803800036058	0.0114338722835503	0.012006118441824	5.64118506030691	0.113788147360023	0.964594168717458	0.0418991967000413	0.0433661597741087	-0.0360478166511927	0.0432557046516562	0.0449669713444161	0.183997311709638	0.0932982803089438	5.67000363745077	0.246709754577403	0.994677092544028
686	2	D	SHAM	SHAM	1	1	1	8	B	2	B02	1	2	4	8	15	2	16486	12296	5341	4792	0.0891910157570264	55	5.65317487304782	0.0924446986864744	5.26090457482155	0.118876386353144	0.930166748625117	0.0121300680277849	0.0124191081064631	0.794281421434818	0.0240369934137627	0.0240323656768702	0.929858479248455	0.0121213062052122	0.0122237108383608	5.65315518639217	0.0925631133822934	0.968443602360266	0.0444089542051585	0.0449749910062813	-0.0320650298404955	0.045768698431328	0.0462194095456785	0.192244906913519	0.0959647802970217	5.68197376353603	0.254957349781285	0.99877566394655
687	2	D	EMS	EMS	1	1	1	8	B	3	B03	1	2	4	8	15	2	16483	12632	5310	4999	0.46510846374006	55	5.6543103725481	0.0803666379871514	5.26018591208768	0.107893826181675	0.929842411219831	0.0116281577945542	0.0117489075125243	0.745463027280367	0.0326086422200368	0.0325970917425712	0.929794489615209	0.0111757033095221	0.0114896612230505	5.65429898009862	0.0802637430750436	0.968209143121596	0.0407884444281565	0.0421892290790549	-0.0323071580987024	0.0421434269657592	0.0434182689890659	0.191744507497215	0.0900657559451989	5.68311755724248	0.254456950364981	0.998526030358902
689	2	D	EMS	EMS	1	1	1	8	B	5	B05	1	2	4	8	15	2	16459	12379	4909	4612	0.408338061914245	56	5.66330366057733	0.0749030191599619	5.29965109367286	0.102411683797765	0.935290627249504	0.0115870975923082	0.0117371287618689	0.762937365881577	0.0304333427443934	0.0304239522930644	0.935116753359599	0.0114937302502979	0.0115339349275965	5.66329373851947	0.075277914120433	0.988116530162853	0.04367750721767	0.0439767429596052	-0.0119546426887582	0.0444691567233482	0.0444297017355512	0.23336462762647	0.090054575117667	5.69211231566333	0.296077070494236	1.01972183597531
690	2	D	EMS	EMS	1	1	1	8	B	6	B06	1	2	4	8	15	2	14614	11379	4826	4587	0.388150122211729	56	5.64728905845204	0.0844886383592032	5.26072948953413	0.115826195077063	0.931183964164177	0.0120307586274343	0.0121848410640028	0.690645045042323	0.0425936970167748	0.0425679668638249	0.930923991253347	0.0116570748018223	0.0117196570775356	5.64711721476399	0.0848187397996779	0.972364947561193	0.0431222530854879	0.0435316468080063	-0.0280240845354343	0.0443234594845633	0.0445458955487677	0.200577214045455	0.0921143326490075	5.67593579190785	0.263289656913221	1.00295080106834
691	2	D	EMS	EMS	1	1	1	8	B	7	B07	1	2	4	8	15	2	16267	12364	5325	5043	0.424675310062876	56	5.65278476440307	0.0829534433667166	5.26125334990501	0.108751798473357	0.930340346238436	0.0116913024373811	0.011860857535467	0.772048437570524	0.0280024652034718	0.0279951493789111	0.93009353744598	0.0114063807053915	0.0116582360255857	5.6527357688057	0.0830926787839689	0.969305867239722	0.0420023198154011	0.043055922392923	-0.031175064432956	0.0431966434045881	0.0441808565740388	0.194083062523515	0.0917012773004837	5.68155434594956	0.256795505391281	0.999693735149814
692	2	D	EMS	EMS	1	1	1	8	B	8	B08	1	2	4	8	15	2	18450	14273	6344	6010	0.524369674852145	55	5.63418092178982	0.0784118782573958	5.20094347240564	0.116959691062995	0.922967733161898	0.0118659150376333	0.011817288795109	0.586944343359144	0.0596401490238281	0.0595695872628876	0.922611243043269	0.0112413612687614	0.0109864237159775	5.63416846290828	0.0789813537673232	0.942621582470924	0.0386345636440236	0.0385054842021185	-0.0590903680127626	0.0411574725476118	0.0405329161507883	0.135571495542016	0.0869513495537213	5.66298704005214	0.198283938409782	0.97128242673449
694	2	D	EMS	EMS	1	1	1	8	B	10	B10	1	2	4	8	15	2	16370	12988	6456	5989	0.442243120817666	55	5.65488470198126	0.0909536866250523	5.28336682031251	0.128416897613651	0.933522839174612	0.0118989192032634	0.0123562650201862	0.732479309120114	0.0355521890630342	0.0355372215860157	0.932884350191016	0.0116016201689877	0.011886176218472	5.65500148511752	0.0909647437557518	0.979665463331838	0.0435364156308955	0.0447409830446997	-0.0205441295425592	0.0444801491399632	0.045478803525997	0.215907227425686	0.093233050700712	5.68382006226138	0.278619670293452	1.01072381079851
695	2	D	EMS	EMS	1	1	1	8	B	11	B11	1	2	4	8	15	2	17544	12932	5120	4715	0.127151872617763	55	5.65181763848949	0.0788129783333681	5.28887717893568	0.106995919139798	0.935416670113701	0.011382856715854	0.0115697143335527	0.798118159699357	0.0242928061725358	0.0242880291415144	0.93534572778745	0.011322430790107	0.0114208063881825	5.65189219403719	0.0787874898542168	0.988991715571348	0.0433055085758162	0.0437836019626274	-0.0110693239654412	0.0438646437714632	0.0441204575616066	0.235155208375543	0.0894986672213993	5.68071077118105	0.297867651243309	1.02065366393236
696	2	D	EMS	EMS	1	1	1	8	B	12	B12	1	2	4	8	15	2	15792	11003	4034	3647	0.133810146268754	57	5.70049949882355	0.0844110765266899	5.31899773254876	0.107852360061817	0.932439651386504	0.0108309663622999	0.0111718002014783	0.853005695563682	0.0139345606186292	0.0139336588232715	0.932263555353357	0.0109534551601424	0.0111087791242372	5.70042571824666	0.0845353702972301	0.977341459069033	0.0406293485537741	0.0415265632747038	-0.0229191904875791	0.0416179241213331	0.0423720079655163	0.211052609740717	0.0869558284657809	5.72924429539052	0.273765052608483	1.00824939552221
697	2	D	EMS	EMS	1	1	1	8	C	1	C01	1	2	4	8	15	3	16703	12116	5127	4609	0.072449524899751	56	5.6701855302069	0.0924707368749124	5.25869234413472	0.127871071274894	0.926701084378324	0.012342278966627	0.0129118663139473	0.735999034558818	0.033632417987661	0.033619745601159	0.926469568533134	0.0122006274521108	0.0125273561761504	5.67019491903059	0.0925382456345994	0.956186598969937	0.0437753090394221	0.0448546657092047	-0.0448021977702337	0.0456549211079272	0.0466997556881345	0.165743613631811	0.0982783322316808	5.69799079715397	0.227352782410113	0.985189546701184
699	2	D	EMS	EMS	1	1	1	8	C	3	C03	1	2	4	8	15	3	15852	12133	4999	4647	0.249141667041469	55	5.6493981481392	0.0857510375911987	5.2559957267224	0.109256312124284	0.930205852674964	0.011990850636016	0.0121780844522049	0.816087102961356	0.0202001605695284	0.0201974137071501	0.930100929523873	0.0118867227683437	0.0120683642892002	5.64933163349931	0.0857108852037028	0.969333009345366	0.0434244738995962	0.0441272070530363	-0.031147063234823	0.0448074394728443	0.045494709475442	0.194140868597103	0.0939774859959085	5.67712751162269	0.255750037375405	0.999171366709193
701	2	D	EMS	EMS	1	1	1	8	C	5	C05	1	2	4	8	15	3	14953	11214	4756	4390	0.421630198535437	56	5.66618745320226	0.0836064347787546	5.29245765945646	0.112202705819713	0.933894641404689	0.0116283851517831	0.0121516678717323	0.754928480524075	0.031584934730578	0.0315744378839746	0.933752749406308	0.0113860794065941	0.0118894464985986	5.66616224864985	0.0833100519967729	0.982935386402849	0.0429281817606503	0.0449930701493979	-0.0172118923695116	0.0436862089986186	0.0456144021718626	0.222698113610088	0.093123814546602	5.69395812677323	0.284307282388391	1.01363812852992
702	2	D	EMS	EMS	1	1	1	8	C	6	C06	1	2	4	8	15	3	15507	11666	5036	4505	0.162437490698224	55	5.63767281508632	0.0874704930272978	5.2526467527761	0.11721714850791	0.93125147405468	0.0122174258831118	0.0125058844108632	0.766170089211388	0.0292818313970857	0.029273466702153	0.930893317986938	0.0120282285363087	0.012266811274097	5.63768755023482	0.0876378254388504	0.97225160506702	0.0446702257445331	0.0455269451663734	-0.0281406550687338	0.0459147261619313	0.046587325123608	0.200337349000622	0.0963595571962313	5.6654834283582	0.261946517778924	1.00227542925486
704	2	D	EMS	EMS	1	1	1	8	C	8	C08	1	2	4	8	15	3	14893	10235	4268	3941	0.334249648852563	57	5.68598075864437	0.084457469634183	5.28680215090673	0.120792721184197	0.929478280817014	0.0121240773446156	0.0126485538030927	0.642128766528024	0.0505364907983787	0.0504935342678975	0.92922278476426	0.0117405511280238	0.0119783691797259	5.68614676432562	0.0845860003516612	0.966119605189862	0.0423857883265004	0.0439751441930825	-0.0344676375377135	0.0442560337343706	0.0452453222231086	0.187273773670774	0.0942989802059846	5.713942642449	0.248882942449076	0.995753761657154
705	2	D	EMS	EMS	1	1	1	8	C	9	C09	1	2	4	8	15	3	14613	9848	4209	3761	0.156246263790346	58	5.70437018338608	0.0784213194357054	5.35338721924973	0.109998082847457	0.938390668797705	0.0111968540709497	0.0116755240082828	0.718062946281539	0.0386243731442723	0.0386051831617899	0.938343869316324	0.010763484861734	0.0113066926212273	5.70437386788806	0.078426477466596	1.00059698034754	0.0423543939213631	0.044302995388986	0.000596802225660827	0.042305880716702	0.0441570696393312	0.258600685053463	0.0884618322531023	5.73216974601144	0.320209853831765	1.03242205665457
706	2	D	EMS	EMS	1	1	1	8	C	10	C10	1	2	4	8	15	3	15481	11569	5296	4663	0.0552670671723456	55	5.6521592799315	0.0920906655627224	5.29001233927954	0.123577860088262	0.935603743811357	0.012420564252578	0.0126298077889084	0.7657592015046	0.0300494968197031	0.0300404570960929	0.935022485352759	0.0123805674864628	0.0123288816677812	5.6521745420028	0.0922068938044416	0.987756674372255	0.0471421879010458	0.0472089380051877	-0.0123188925661568	0.047816007892282	0.0475771041221592	0.232627451466517	0.0967446822921567	5.67997042012618	0.294236620244819	1.01876579293943
707	2	D	EMS	EMS	1	1	1	8	C	11	C11	1	2	4	8	15	3	16123	12604	5945	5412	0.54397235411632	56	5.66148991950195	0.0836154543182774	5.27528946459818	0.122692223982775	0.930881097703593	0.0122754555220155	0.012308537765782	0.70641098554051	0.0396485934541467	0.0396278370203739	0.930259983371582	0.0119084107343021	0.011802042934122	5.66155434634551	0.0835858621644471	0.969917401197646	0.0436650256612702	0.0439211940065316	-0.0305443647181339	0.0451937696669902	0.0449017292430781	0.195384671077345	0.0934224696760854	5.68935022446889	0.256993839855647	0.999792894674576
709	2	D	EMS	EMS	1	1	1	8	D	1	D01	1	2	4	8	15	4	14885	10746	4482	4084	0.478566650295486	56	5.67885921593147	0.0882661529047534	5.31282556280199	0.119385047668429	0.935306743636826	0.0128817820672037	0.0129681694233463	0.747946696920469	0.0329925500161611	0.0329805869395387	0.934927745825661	0.0126341185954871	0.0126504262558773	5.67895869073029	0.0885994372510489	0.987395285885514	0.0480995901896987	0.0485141960522712	-0.0126848274800443	0.0487799107613458	0.0488501299087277	0.231886588219116	0.0994932147428837	5.709434120264	0.29061835897178	1.01689136773472
710	2	D	EMS	EMS	1	1	1	8	D	2	D02	1	2	4	8	15	4	15971	11171	4626	4101	0.0490722382868753	56	5.66563257801124	0.089339352179623	5.27986534210658	0.111271149360888	0.93085882933706	0.0118550871058166	0.0117803925278369	0.833800154187313	0.017131127691979	0.0171294521313916	0.930703440720982	0.0117885717598393	0.0116760929697965	5.66566022416017	0.089438570175242	0.971550583737617	0.0435834849914691	0.0430342366261104	-0.0288619438540151	0.0447823468146979	0.0442067857855646	0.198852508152465	0.0912189874053769	5.69613565369388	0.257584278905129	1.00008820770281
712	2	D	EMS	EMS	1	1	1	8	D	4	D04	1	2	4	8	15	4	6880	3991	1926	1716	-0.44784789554939	56	5.66158646874282	0.148658026966847	5.30240128270196	0.202528773515238	0.935933864560282	0.0157769429439322	0.0163771587600752	0.676657351121895	0.045795734971078	0.0457637601719177	0.934551772118358	0.0140218227462475	0.0149831694586446	5.66172271326329	0.149085051353772	0.98596375253966	0.053419066665753	0.0584495120200173	-0.0141356872863969	0.0540286644961898	0.0582672180677876	0.228946472831049	0.12022156864845	5.692198142797	0.287678243583713	1.01537323986605
714	2	D	EMS	EMS	1	1	1	8	D	6	D06	1	2	4	8	15	4	15317	11476	4824	4468	0.322969095954908	55	5.64535446689983	0.077420858666453	5.27050997356923	0.103556449573063	0.933403428692294	0.0116607131414132	0.0120437448173032	0.777486227466483	0.0276186733959743	0.027611654181936	0.93327559961839	0.0115849581391174	0.0118680359849142	5.64531345594301	0.0775345588550763	0.981135949229339	0.0432648665906993	0.0446446313072613	-0.0190442467898959	0.0442517442348995	0.0453943445461026	0.218966799510063	0.0927480651543463	5.67578888547672	0.277698570262727	1.01025339912252
716	2	D	EMS	EMS	1	1	1	8	D	8	D08	1	2	4	8	15	4	16010	12006	5797	5290	0.336065179387632	55	5.64880919889401	0.0918987236056627	5.25787525945873	0.118932719671917	0.930536782959137	0.0113982385001071	0.0115602641355262	0.810650674996582	0.0212232532099027	0.0212200675657403	0.93030904304044	0.0113717018911227	0.0113855723758042	5.64880166508644	0.0920258403205366	0.970097801270217	0.0413957412146297	0.0418732967045193	-0.0303583865224233	0.0427902642714931	0.043060218466035	0.195768317014666	0.0890323312188418	5.67927709462015	0.25450008776733	0.998547545337349
720	2	D	SHAM	SHAM	1	1	1	8	D	12	D12	1	2	4	8	15	4	16940	12169	5014	4512	0.0343832723583208	56	5.6641862913152	0.0883699111514426	5.28226628480001	0.115630801434925	0.932120133158667	0.0118726574892885	0.0122521665475546	0.827119009712266	0.0185377242283498	0.0185356011869436	0.931987953390221	0.0119358792448326	0.012141492143127	5.66410333077366	0.0884029484268374	0.976313328180347	0.0443027884538853	0.0451448775286397	-0.0239717113735722	0.0454076293066233	0.0461604981842046	0.208897402552056	0.0947364660895901	5.69457876030737	0.26762917330472	1.00513905411919
721	2	D	SHAM	SHAM	1	1	1	8	E	1	E01	2	2	4	8	16	1	16761	11908	5218	4628	0.00772427027925637	56	5.66917735644361	0.0965691510798393	5.29108011069024	0.136960465874107	0.933029814780678	0.0139434379528553	0.0144638067597294	0.691558592125959	0.0425936970167748	0.0425679668638249	0.932622052748153	0.0137089538718439	0.013874608202803	5.669054484901	0.0968361847498446	0.978682151969071	0.051091050709323	0.0521217782184724	-0.0215483554489491	0.0523822645771706	0.052977508970635	0.213856061659536	0.108836459837629	5.69826466593746	0.282933463640544	1.0129326682841
722	2	D	EMS	EMS	1	1	1	8	E	2	E02	2	2	4	8	16	1	16215	11382	4117	3778	0.311385688745454	56	5.6755098020943	0.0741075509941341	5.29303753944342	0.107522332095758	0.932478136821516	0.0122768605933838	0.0125118276139834	0.674745051378426	0.0454114422193377	0.0453802649749455	0.932204909478254	0.0119985481754926	0.0120948461967122	5.67555550300498	0.0740533243950129	0.977122495452864	0.044965717596145	0.0455656179851267	-0.0231432556657006	0.0460149694149737	0.0462927092772447	0.210593998974703	0.0954572994094449	5.70476568404144	0.279671400955711	1.01126146646948
724	2	D	EMS	EMS	1	1	1	8	E	4	E04	2	2	4	8	16	1	17306	12161	5654	4837	-0.0912432122509013	56	5.66596352692022	0.0961146384780939	5.28536374605819	0.136304023481266	0.932074810174785	0.0131678775086257	0.0136703658334796	0.675501014208908	0.0452833476154302	0.0452524332426238	0.931745310252165	0.0127735430266674	0.0129708871769778	5.66611119218926	0.0962740790541706	0.975409981339278	0.0474373751739443	0.0482576462877136	-0.0248974026856716	0.0485871031384395	0.0493149012656081	0.206999931334307	0.101460943920989	5.69532137322572	0.276077333315315	1.00942647481301
725	2	D	EMS	EMS	1	1	1	8	E	5	E05	2	2	4	8	16	1	16446	12296	5418	4835	0.270446384971187	56	5.66005872410391	0.077297197304396	5.27950268398316	0.109207232665014	0.932177106460824	0.0119362522542145	0.0120776627721443	0.712836268188893	0.0387523962141677	0.0387330148941097	0.93178752432246	0.0116393519345548	0.0117127764341856	5.66001679667898	0.077366991979742	0.975567018736556	0.0434163989766656	0.0438601212411045	-0.0247364193449033	0.0445518822547591	0.0447047503173755	0.207330045503719	0.092184780003638	5.68922697771544	0.276407447484727	1.00959474339046
726	2	D	EMS	EMS	1	1	1	8	E	6	E06	2	2	4	8	16	1	16021	11646	5074	4445	0.111215171412304	56	5.65701089052829	0.0897488270397863	5.29243329824402	0.114308194535411	0.934961983627837	0.0123629991675402	0.0125164351369317	0.790301363309176	0.0255719183006826	0.0255663464647635	0.934559354654448	0.0123326550130759	0.0123098303292902	5.65715097449749	0.089575278225944	0.98599258155147	0.0470439950855951	0.0468899116492978	-0.0141064481892757	0.0476643828691394	0.047381971213843	0.22900576787303	0.0964395474079482	5.68636115553395	0.298083169854038	1.0207659335299
727	2	D	EMS	EMS	1	1	1	8	E	7	E07	2	2	4	8	16	1	17531	13175	5501	4550	-0.103002593927094	54	5.61258943945615	0.100026161139771	5.20915697391788	0.136507473677285	0.927290097627617	0.0142085992847597	0.0149798347938168	0.717692371755989	0.0373442112829721	0.037326865838545	0.926797633004202	0.0139522777931485	0.0145159928796254	5.61271193755371	0.100316875481126	0.95735899218792	0.0503777336745031	0.0531811943673963	-0.0435768355675779	0.0525891489422787	0.0546934547512674	0.168309079542145	0.116223532866028	5.64192211859017	0.237386481523153	0.990084494375638
729	2	D	EMS	EMS	1	1	1	8	E	9	E09	2	2	4	8	16	1	16294	12823	6079	5588	0.330080060463237	55	5.64219584728297	0.0969086183725994	5.25916486622584	0.130517638227511	0.931663353643076	0.0116707632350159	0.0119601171744035	0.732515253655732	0.0352962047716306	0.0352815581213675	0.931123376399356	0.0110315614922789	0.011435075325693	5.64210034590196	0.0968610746982941	0.973102369960305	0.0408320699645016	0.0429078428702423	-0.0272659917525357	0.0419837212933902	0.0436902335787742	0.202136406842745	0.0906528883332094	5.67131052693842	0.271213808823753	1.00695382504435
731	2	D	EMS	EMS	1	1	1	8	E	11	E11	2	2	4	8	16	1	12358	9023	3599	2938	-0.358350355585106	56	5.67894289889649	0.141997313906477	5.25449490474177	0.177401947412756	0.924776986125276	0.0132541011884728	0.0143359712336361	0.608663236537221	0.0556641887787746	0.0556068035608537	0.923949775468185	0.0114566691290967	0.0122710757685359	5.67878288666323	0.142386568206006	0.947281272558975	0.0400183282898132	0.0439661027272623	-0.0541592156025529	0.0423797721514116	0.0457467222583772	0.146038823633695	0.0982484721619346	5.70799306769969	0.215116225614703	0.979286024868956
732	2	D	EMS	EMS	1	1	1	8	E	12	E12	2	2	4	8	16	1	17039	13016	4822	4546	0.419168414393972	55	5.65760268123392	0.0709197560732617	5.24974241315706	0.106084634746024	0.927540282919463	0.0125526060085307	0.0127705903099439	0.634373742564698	0.051818156359263	0.0517718515911394	0.927333048264717	0.0122492659159093	0.0122825726784218	5.65777837240244	0.0708166551485746	0.95927885913055	0.0441228368585983	0.0444944027488022	-0.0415734652125636	0.0459356924840713	0.0460724786989442	0.172496028004561	0.0968329134652205	5.6869885534389	0.241573429985569	0.992141668557913
734	2	D	EMS	EMS	1	1	1	8	F	2	F02	2	2	4	8	16	2	16167	12257	4954	4561	0.245827180269586	56	5.65934849043321	0.0825274797581527	5.25624616268857	0.114093745564252	0.928150731669885	0.0126093414125725	0.0126599287841242	0.755193722162482	0.0305612933714501	0.0305517840253931	0.928093559743687	0.0122234033629029	0.0124241663168779	5.65942664356486	0.0824467807593261	0.962019721010099	0.0443426546618494	0.0451754982303941	-0.0387203285160554	0.0460705957802599	0.0466923280136503	0.178443230272811	0.0977322126309378	5.68646055223592	0.244301529199811	0.993486707974422
735	2	D	EMS	EMS	1	1	1	8	F	3	F03	2	2	4	8	16	2	16719	11833	5076	4469	-0.00400898655502768	56	5.66755567706931	0.0954881715350766	5.2894841563236	0.128487409436619	0.932711256049244	0.0128795854627849	0.0131792421506713	0.759503424303301	0.0305612933714501	0.0305517840253858	0.932341484107078	0.0128308747941764	0.0128484573368253	5.66747221815558	0.0956158882750075	0.977632573877644	0.0477901853201081	0.0482532448532094	-0.0226213708686406	0.048905978399104	0.0490822745893757	0.211662012852716	0.100979814740272	5.69450612682664	0.277520311779716	1.01016241140622
736	2	D	EMS	PETITE	1	1	1	8	F	4	F04	2	2	4	8	16	2	2576	2153	1107	1039	-0.529325555578591	52	5.50713774828638	0.157495658052241	5.1367871327418	0.167320752266905	0.933038833227822	0.0145771022845543	0.0153859741028267	0.863340403382963	0.0126560171600114	0.0126553415000626	0.932710640137234	0.0145027010811912	0.0152761079546868	5.50697544690157	0.157591175806495	0.979014026099971	0.0544932250963157	0.0580612068531125	-0.0212093095879938	0.0552417541734299	0.0586310844881739	0.214548814230231	0.121154732513482	5.53400935557263	0.280407113157231	1.01163790648455
737	2	D	EMS	EMS	1	1	1	8	F	5	F05	2	2	4	8	16	2	16193	12148	4937	4481	0.236873304656815	55	5.65272003423804	0.0810695298905059	5.26256973321755	0.110954239559521	0.930424225169839	0.0119264865882654	0.0120998229806306	0.779365510291469	0.0267231905991134	0.0267168320556683	0.930306243157553	0.0115862647343853	0.0119192999125378	5.65276467890779	0.0810248253310566	0.970087503764576	0.0423709711262561	0.0440543073954327	-0.0303690014868185	0.0439654538892433	0.04518054080151	0.195746421891951	0.0936717162390766	5.67979858757885	0.261604720818952	1.00210370793639
739	2	D	SHAM	SHAM	1	1	1	8	F	7	F07	2	2	4	8	16	2	16668	12892	5109	4640	0.230036372875008	56	5.65429256200286	0.0784961877960935	5.26634225519669	0.109550952010524	0.931219747060624	0.0122779530219326	0.0126660807547226	0.736710409747235	0.034400295913321	0.0343867359951026	0.931200365673626	0.0121158678567323	0.0123926031659672	5.65435644193595	0.0785906735127356	0.973387421066695	0.044821149655591	0.0462148736906629	-0.0269731043442816	0.0460480898866645	0.0471809773124167	0.202738462933009	0.0975810001618389	5.68139035060701	0.26859676186001	1.00562826829358
740	2	D	EMS	EMS	1	1	1	8	F	8	F08	2	2	4	8	16	2	15678	12314	5062	4758	0.593912465719156	56	5.6572672089578	0.0748814806160881	5.29474501063452	0.102951759032807	0.935805325794898	0.0112470985070757	0.0112717530306691	0.74264171516707	0.0341443321471487	0.0341310725304546	0.935701035932753	0.0108648590503508	0.0110153280359641	5.65704987472382	0.0750397020014336	0.990352879790613	0.0416925474553649	0.0422990154406284	-0.00969395516184603	0.0421087999161965	0.0425957710163233	0.237933719370486	0.0862240956121881	5.68408378339488	0.303792018297486	1.02374865671103
741	2	D	EMS	EMS	1	1	1	8	F	9	F09	2	2	4	8	16	2	14864	11664	5100	4663	0.0358516287069404	55	5.64494152825286	0.105298125385337	5.21301277880801	0.133697691873344	0.922741667681346	0.0114206666676283	0.011688385443002	0.776945525581666	0.025827750627703	0.0258220099294043	0.922137405658861	0.0109665174592394	0.011343013597558	5.64490986149587	0.105556690967342	0.940983717286994	0.037652791543373	0.0395769502492849	-0.0608294431734661	0.0400156917085838	0.041734975044176	0.131866085618026	0.0897026559663251	5.67194377016693	0.197724384545026	0.971018670745562
742	2	D	EMS	EMS	1	1	1	8	F	10	F10	2	2	4	8	16	2	1204	648	489	329	0.94291938209978	47	5.33552409295617	0.0932045561980512	5.12739639077661	0.162413282235872	0.961872504877099	0.0255181012142647	0.0249777152056955	0.772865851843468	0.0354241963377418	0.0354093898536922	0.960783206253682	0.0235889494536997	0.0248102221543534	5.33594859112717	0.0917355607348896	1.09665977794196	0.108397452211707	0.111697704942212	0.0922689945775513	0.10022470369341	0.102740231137538	0.434076374164918	0.187136699726253	5.36298249979823	0.499934673091918	1.13729243512013
744	NULL	D	NULL	NULL	1	1	1	8	F	12	F12	2	2	4	8	16	2	16871	12111	4982	4818	0.0358574239764478	55	5.66255952151383	0.0909721533896791	2.88309335857569	0.188605327347075	0.509192523074393	0.0314444091181831	0.0338965132966958	0.524393510242503	-0.00268447282723597	-0.00268446637880368	0.50925629208142	0.0314445624201876	0.0338957047926744	5.66251770991395	0.0910697146447333	0.517257153426803	0.00430518830357782	0.00445824602063806	-0.659215132724234	0.00831388214152435	0.00860772830912662	-3.09686558885975	0.255121674924551	5.68955161858501	-3.03100728993275	0.518446768925115
745	2	D	EMS	EMS	1	1	1	8	G	1	G01	2	2	4	8	16	3	22058	16615	6965	6334	-0.0220666389698754	55	5.64743529749059	0.0945025685586268	5.26249736336439	0.128815018693516	0.930715126988621	0.0131958451796887	0.0136343281651272	0.690169979005468	0.0425936970167748	0.0425679668638249	0.930299911709044	0.0130962662965286	0.0130083338177686	5.64755498892055	0.0946485251721954	0.970064218615661	0.0483257233522382	0.0479451182314214	-0.0303930049216325	0.0496520702852707	0.0492181968243552	0.19569690996025	0.101949710350104	5.67461063880554	0.259553373534968	1.00107432819071
746	2	D	EMS	EMS	1	1	1	8	G	2	G02	2	2	4	8	16	3	15242	11126	4882	4357	-0.0225404259875193	56	5.67181408778805	0.106514476056359	5.31242279467479	0.140284330409724	0.936100258332563	0.0133927872735347	0.0137692930914458	0.816451274220462	0.0210953642450511	0.0210922358334123	0.935880663516651	0.0131812507631641	0.0135885971512875	5.67199123245491	0.106759075128021	0.991042462872596	0.0507658234998207	0.0524609943521366	-0.00899789706094137	0.0511079774174289	0.0526225806437393	0.239338407548224	0.106788591588647	5.6990468823399	0.303194871122943	1.02343586500696
747	2	D	EMS	EMS	1	1	1	8	G	3	G03	2	2	4	8	16	3	16044	12095	4838	4388	0.249976835895223	55	5.66376921946367	0.0876631378926118	5.28728765868969	0.118475785169774	0.933320861354423	0.0125523596775185	0.0131035335945448	0.713111132189538	0.0388804205524704	0.0388608466264393	0.93337062263722	0.0127026578940664	0.0126825484497269	5.66372110113941	0.0879574314227245	0.981493766864074	0.0478222311416912	0.0478802491294519	-0.0186796160674169	0.0489248769379332	0.0485825173480637	0.219709880225151	0.0993960906042849	5.6907767510244	0.283566343799869	1.01325753384032
749	2	D	EMS	EMS	1	1	1	8	G	5	G05	2	2	4	8	16	3	16794	12327	5275	4779	0.248225190697763	56	5.67094220722968	0.092014833989874	5.31388619398545	0.126060480877462	0.936605904935405	0.0125365273418548	0.0128679930965436	0.77417800364378	0.028642136589675	0.0286343080405227	0.936475537602937	0.0124438919178145	0.0126001166319946	5.67096431154049	0.0919945642656038	0.99333308889133	0.0479156810690589	0.0486624640504912	-0.00668923423338059	0.0483799464390583	0.0488279169571885	0.243990324871675	0.0985966444033554	5.69801996142548	0.307846788446393	1.02587753350042
750	2	D	SHAM	SHAM	1	1	1	8	G	6	G06	2	2	4	8	16	3	16801	13085	5766	5119	0.136419419352274	55	5.65486066656567	0.0891774205162223	5.27947530126448	0.111903452920016	0.932967204629255	0.0118925062857852	0.0121754263992247	0.822353892974347	0.0195607492698996	0.0195582550455365	0.932837123222801	0.012063181763102	0.0120488790602413	5.65483796345508	0.0892495166089289	0.97948826793441	0.0452052711787175	0.0451965034502878	-0.0207250192757979	0.0460946261880891	0.0460208465628027	0.215537912377954	0.094217071706551	5.68189361334007	0.279394375952672	1.0111197935413
751	2	D	EMS	EMS	1	1	1	8	G	7	G07	2	2	4	8	16	3	16645	12473	5065	4692	0.306058869056903	56	5.6655040643501	0.0840552995515866	5.2656961445292	0.10993289828686	0.928825045410831	0.0119175345329839	0.0121593735387807	0.807860058709758	0.0213511428686882	0.0213478992980604	0.928647212267238	0.0118809788808423	0.0120366024085244	5.66555441164363	0.0840011397303031	0.964025346931987	0.0432199615515475	0.0437589143120797	-0.036637691222645	0.0448352588231511	0.0452392726378	0.182772794853472	0.0942586059709068	5.69261006152862	0.246629258428191	0.994637257012146
752	2	D	EMS	EMS	1	1	1	8	G	8	G08	2	2	4	8	16	3	15856	11841	4847	4537	0.560091337358198	56	5.66857413230575	0.0770141066652087	5.27224784180008	0.107639824190554	0.929893704392361	0.0113601929265898	0.0118130372907165	0.742147573338506	0.0331205214348122	0.0331084186718672	0.929690733804969	0.0113312861584518	0.011573874068163	5.6684035476153	0.0769734493304209	0.967829229312867	0.0414986505146382	0.0426738184446063	-0.0326996232677974	0.0428846697025653	0.0438239623745174	0.190933136717763	0.091174205585122	5.69545919750029	0.254789600292481	0.998691965064114
754	2	D	EMS	EMS	1	1	1	8	G	10	G10	2	2	4	8	16	3	1418	895	662	445	1.252836765031	47	5.33793024028952	0.0936844515861655	5.10322541666462	0.164626053748113	0.960310210786677	0.026374171300965	0.0279443601662395	1.38906648618724	-0.0803225700037082	-0.080150496167025	0.957693742431996	0.0281957769812334	0.0272463293212536	5.33780623291446	0.0932630243590882	1.0824122439362	0.129982565205511	0.117160770662146	0.0791921096510022	0.118815362002697	0.110325165009032	0.409916756854986	0.201089467756059	5.36486188279945	0.473773220429704	1.12083051339236
755	2	D	EMS	EMS	1	1	1	8	G	11	G11	2	2	4	8	16	3	16623	12300	5548	4811	0.0224644187931218	55	5.65533055800934	0.0935313799776606	5.26535799474602	0.119024159682743	0.93006484488611	0.0117923309548727	0.0120802443528094	0.818719132678244	0.0196886302340317	0.0196860867778592	0.929758068141715	0.0115859821722306	0.0119295364557072	5.65527209780229	0.0936071996745159	0.968075746603332	0.0424745275173256	0.0440502583529678	-0.0324449441437032	0.0438084115646104	0.0451996221050339	0.191459691453958	0.0940654771494815	5.68232774768728	0.255316155028676	0.998954737553511
756	2	D	EMS	EMS	1	1	1	8	G	12	G12	2	2	4	8	16	3	17565	13316	5731	5338	0.238119030332427	55	5.65025408312382	0.0809653372363593	5.27859585474167	0.111114505377784	0.934032122995969	0.0123954471636547	0.0126019333268315	0.758461179402109	0.0310731059189453	0.0310631109546853	0.933846552106932	0.0123093071644037	0.0123704990113895	5.65002856926794	0.0811244519795754	0.983289926946487	0.0466306277030208	0.0468032229102375	-0.0168512615086112	0.0474299319020843	0.0474519718259469	0.223431650128566	0.0967993225031441	5.67708421915293	0.287288113703284	1.0151721316169
757	2	D	EMS	EMS	1	1	1	8	H	1	H01	2	2	4	8	16	4	15857	11810	5191	4617	0.0359849472436089	55	5.65551683634146	0.102062404336932	5.33343719794176	0.142223812219872	0.943028986760505	0.013991539084481	0.0144048520214954	0.763676177951451	0.0317128945062211	0.0317022696163018	0.942415793000331	0.0138257324712738	0.0140324726229355	5.65559274428429	0.102122741232703	1.01680076922974	0.0556766682561284	0.0570570470316623	0.0166611974130196	0.0549761112833404	0.0557480209783296	0.290443141738138	0.110357823796084	5.67901668176839	0.352603033162488	1.04995845228508
759	2	D	EMS	EMS	1	1	1	8	H	3	H03	2	2	4	8	16	4	16852	12550	5208	4674	0.0811338437579359	55	5.66195979069844	0.0939442896246924	5.27651465151172	0.127951752127972	0.930967359390442	0.0135653996342592	0.0137082723699446	0.764450405992327	0.0294097732152163	0.0294012984344755	0.930588333559226	0.0132955947902184	0.013415186916781	5.66213156115924	0.094036405418765	0.971126118927694	0.0487568630160156	0.0496390593745735	-0.0292989340032615	0.0502770607886882	0.0508454411394681	0.197952371840002	0.105313879405385	5.68555549864334	0.260112263264353	1.00135457353293
760	2	D	EMS	EMS	1	1	1	8	H	4	H04	2	2	4	8	16	4	17624	12981	5281	4858	0.0844927808089619	56	5.67071793661875	0.0958102950677411	5.28979846832517	0.123741451447023	0.931515636414748	0.0127929983573662	0.013332921193574	0.791581987876333	0.0246765312791862	0.0246715243384917	0.931106417316736	0.0129812659825688	0.0131254753528945	5.67071201113012	0.0957073082760416	0.973039604363461	0.0481748454310733	0.0487092389103926	-0.0273304953422231	0.0495498665908142	0.0498309682130245	0.202003790995528	0.102923347390413	5.69413594861422	0.264163682419878	1.00339077552898
761	2	D	EMS	EMS	1	1	1	8	H	5	H05	2	2	4	8	16	4	17248	12898	5308	4845	0.318299421102598	56	5.66791595344756	0.0892090436589623	5.28327408445016	0.114220902236586	0.931299676792732	0.0122420280129772	0.0122271297243369	0.837825606410404	0.0164917883663169	0.0164902934697643	0.931144114903262	0.0123123288686078	0.0121413565401629	5.66798902381453	0.0892474525416396	0.973179136827884	0.045417719598347	0.0450413736870814	-0.0271871060051044	0.0465292039934819	0.0461100334878516	0.202298581716274	0.0951450415271409	5.69141296129863	0.264458473140625	1.00353925655594
762	2	D	EMS	EMS	1	1	1	8	H	6	H06	2	2	4	8	16	4	14817	8846	3808	2730	-0.652850879537905	58	5.74738072957838	0.147944278214613	5.41475698173345	0.161529009848015	0.939894261166207	0.0138608023254502	0.0145313038685359	0.786305910484011	0.0267231905991137	0.0267168320556683	0.939366409822228	0.0139726685220344	0.0140094104128187	5.74756602026269	0.147921203117036	1.00461768472665	0.0545860504871501	0.0551181341556597	0.00460705592731217	0.0543459720171789	0.0547489718609531	0.266596955197444	0.109180382489979	5.77098995774679	0.328756846621794	1.03699403639794
764	2	D	EMS	EMS	1	1	1	8	H	8	H08	2	2	4	8	16	4	16529	12623	4550	4269	0.358884740383307	55	5.6555830707173	0.0729419751448098	5.2469095381028	0.103580189437842	0.927427940107516	0.0118158641690284	0.0120308141881387	0.72780732194051	0.0352962047716307	0.0352815581213644	0.927159138804539	0.0117615485549804	0.0117770820935662	5.65557799369908	0.073028987596963	0.958654380976383	0.0419243726148472	0.0426413170897324	-0.04222466428463	0.0438752319812499	0.0441781823319655	0.171136055436275	0.0929263451598127	5.67900193118318	0.233295946860626	0.988082992137005
765	2	D	EMS	EMS	1	1	1	8	H	9	H09	2	2	4	8	16	4	16010	11164	4608	3871	-0.202443294391764	56	5.66675471882913	0.102292046397958	5.29487167230083	0.137098800824244	0.933635623698868	0.0129821571317125	0.0133908571561475	0.730719461999584	0.0358081780079606	0.0357928850506613	0.933057304156139	0.0125790991584789	0.0128380975006307	5.66680749057846	0.102352643578274	0.980314944871894	0.0469227230527802	0.0483034311878252	-0.0198813866282822	0.0481045878392835	0.049086924268106	0.217259728005329	0.100520576567925	5.69023142806256	0.279419619429679	1.01113270164367
766	2	D	EMS	EMS	1	1	1	8	H	10	H10	2	2	4	8	16	4	8648	4656	1483	1260	-0.49914623861238	61	5.78494057240439	0.057175775471487	5.52993570872236	0.0939850937500729	0.955584376183574	0.0108173433350988	0.01127418483147	0.54967475359995	0.0701666019733918	0.0700517893134423	0.95585856601206	0.0102786390748925	0.0106094377004762	5.78515891818165	0.0573656194166548	1.07411058131489	0.0461034790068009	0.0475384556824343	0.0714929528969695	0.0427690377922428	0.0442136002906547	0.395565671204337	0.0827722520372741	5.80858285566575	0.457725562628687	1.11094368456326
767	2	D	SHAM	SHAM	1	1	1	8	H	11	H11	2	2	4	8	16	4	17391	12383	5319	4586	-0.0914135431545637	56	5.66644027949502	0.0961005935278252	5.27260733296613	0.121693378330921	0.92942338460946	0.0123451140079108	0.0128223449583866	0.84104541243548	0.0155967358367457	0.0155954713435019	0.92915615338742	0.0123292969492249	0.0127284599390254	5.66647634672699	0.0963436242626111	0.965876679833832	0.0451648249531931	0.0463174312590515	-0.0347191135495458	0.0467325576625526	0.0478417555031556	0.186752716096745	0.0993734761498437	5.68990028421109	0.248912607521096	0.995768474908255
770	3	A	EMS	EMS	1	1	1	9	A	2	A02	1	3	1	9	17	1	17928	13685	5954	5279	0.103144018072888	56	5.66788236517625	0.0910434937584502	5.23710117575329	0.126237943333742	0.923564850215265	0.0133838375416861	0.0140593515122287	0.726411812969113	0.0347842500150444	0.034770231192065	0.923178801589692	0.0132332104651102	0.0137017003970707	5.6679568222202	0.0910149353143401	0.944591409030356	0.0458913320870393	0.0480572763070861	-0.0570028163843067	0.0487110464228837	0.0504813364607352	0.140009805243541	0.108040194587701	5.6843307311981	0.200850215928951	0.972493981160889
771	3	A	EMS	EMS	1	1	1	9	A	3	A03	1	3	1	9	17	1	20066	15399	6307	5831	0.106941611297173	55	5.64764307764016	0.0784251621046889	5.28330122870355	0.116557975439518	0.934463602730009	0.0128686025306963	0.0135583788860696	0.64108925935642	0.0519463321850315	0.0518996833234624	0.934082841566855	0.0126802472980531	0.01293070043293	5.64762863170493	0.0784934976743218	0.984184170680552	0.0481345499451285	0.048983468734306	-0.0159422341173641	0.0488778980395845	0.0496072630413238	0.225279433951065	0.101121525241377	5.66400254068283	0.286119844636475	1.01457036905081
772	3	A	SHAM	SHAM	1	1	1	9	A	4	A04	1	3	1	9	17	1	16740	12980	5778	5107	0.0633814116049898	55	5.66095175938418	0.0956410695321751	5.26532027531276	0.129997041178667	0.929945002004411	0.0131482700843563	0.0136957508546622	0.754041648383027	0.0310731059189453	0.0310631109546817	0.930002686797149	0.0128110157113444	0.0133676798110232	5.66108809504002	0.0957374059212026	0.968972411483211	0.0470172309954222	0.0493155182140184	-0.0315191386182379	0.0483827568056778	0.050584332658605	0.193372610148999	0.10510772448837	5.67746200401792	0.254213020834409	0.998404386840971
773	3	A	EMS	EMS	1	1	1	9	A	5	A05	1	3	1	9	17	1	16881	12852	5517	4842	-0.109222032420088	56	5.67159951620929	0.0956307301035008	5.27729283181402	0.128082902040711	0.930081047139126	0.0126543740923965	0.0132859734143613	0.790851093862619	0.0245486221089115	0.0245436926061555	0.929970873118237	0.0124819393240183	0.0130655284676798	5.67179014881336	0.0957553683607759	0.968855699443001	0.0458495282842741	0.0477848837183542	-0.0316395951795565	0.0473978979251933	0.0492236405406344	0.193123827140588	0.101870775318699	5.68816405779126	0.253964237825998	0.998280353536129
775	3	A	EMS	EMS	1	1	1	9	A	7	A07	1	3	1	9	17	1	17051	13114	5659	5013	-0.101249449928832	55	5.65610203682576	0.102882152011699	5.25199815855231	0.135003586911149	0.928220967618979	0.013451557502973	0.0137802703428753	0.810350129333981	0.0208395883804014	0.0208365723687822	0.927857149999584	0.0137462607554868	0.013608768435465	5.65614505522534	0.103033831869231	0.961165960337169	0.0494419509745861	0.0490109815170034	-0.0396081894618751	0.0513769816132805	0.0508664756445557	0.176594505291546	0.106226059450618	5.67251896420324	0.237434915976956	0.990108242475832
777	3	A	EMS	EMS	1	1	1	9	A	9	A09	1	3	1	9	17	1	15638	12077	5308	4717	0.174604742712303	55	5.63623105509173	0.0890187312832459	5.19371995303863	0.144046346133332	0.92167766205548	0.017456860697278	0.0170033330827832	0.65417559248806	0.0474611610050586	0.0474255726921334	0.921305289547311	0.0167515835075271	0.0164834488027382	5.63599202146676	0.0890776391817529	0.938122073008287	0.0574804849757868	0.0566403675120983	-0.0638751966437419	0.0611621907378556	0.0600145740437467	0.125358934871871	0.129215632983087	5.65236593044466	0.186199345557281	0.965618828216022
778	3	A	EMS	EMS	1	1	1	9	A	10	A10	1	3	1	9	17	1	17975	13864	6142	5581	0.108442862540854	56	5.66278709836703	0.0843618040557032	5.30427720577938	0.117503408822657	0.936239667384274	0.0133832104128886	0.0135424058804767	0.772596379715328	0.0288980116727565	0.0288899715051791	0.936138840779004	0.0133542119620671	0.0133268244272543	5.66267401568815	0.0843509154049334	0.99203529328041	0.0514272634160221	0.0510214254581137	-0.00799659442650413	0.05208601232842	0.0514068049479351	0.241357354594248	0.103648760078348	5.67904792466605	0.302197765279658	1.02291398707881
780	3	A	EMS	PETITE	1	1	1	9	A	12	A12	1	3	1	9	17	1	9225	8501	4095	3891	0.251956071580957	51	5.4771806042434	0.107969143817684	5.17918397875116	0.131731744706095	0.944294903178815	0.0145065408073613	0.0147421231741424	0.875675879966421	0.0125281651584087	0.0125275097677434	0.944404002996875	0.0145245336089373	0.0146860845497146	5.47720625555279	0.108029570496204	1.02490209117548	0.0601162456449311	0.0602514955773449	0.0245970872235583	0.0586358065172539	0.0585810043575014	0.305990950490941	0.114738545628637	5.49358016453069	0.366831361176351	1.05784249621264
781	3	A	EMS	PETITE	1	1	1	9	B	1	B01	1	3	1	9	17	2	11001	9796	4578	4361	0.00680222322090662	52	5.50094827689242	0.108306542315799	5.19750936414074	0.132204950383876	0.945157003948439	0.0120306093358734	0.0119488668978372	0.860766894854989	0.0153410111940053	0.0153398078788469	0.945049689943328	0.0120169431920146	0.0118429039493422	5.50094137853668	0.108321790410126	1.02756027084193	0.0497274736737813	0.0490927566778637	0.0271873234216545	0.0482775343778369	0.0475474431027782	0.311040224549055	0.0930177985248354	5.51978326288465	0.369331553953661	1.05923950026154
782	3	A	EMS	EMS	1	1	1	9	B	2	B02	1	3	1	9	17	2	16975	13307	5499	5037	0.328525689982817	56	5.66823025107341	0.0811409377540584	5.26875811056952	0.112231348781407	0.929717063033644	0.0129041739035047	0.0131221048689941	0.789844801945402	0.0246765312791862	0.0246715243384917	0.929619987668529	0.0129412225909767	0.0129836404019854	5.6682086570351	0.0814061590801771	0.967570360904489	0.047654118603396	0.0476074805466484	-0.0329671322734108	0.049026990373469	0.048993767134189	0.190379901696677	0.101771446734649	5.68705054138307	0.248671231101283	0.995648769958223
786	3	A	EMS	EMS	1	1	1	9	B	6	B06	1	3	1	9	17	2	16148	12877	5431	4918	0.135408877818133	55	5.65584311065415	0.08640705085534	5.24870873553875	0.115440369437859	0.926814534431895	0.0125338348563261	0.0129089184029307	0.762648311530756	0.029025950630047	0.029017803237504	0.926508098194391	0.0125275451226048	0.0126703679158426	5.65567316787306	0.0863163116864001	0.956324135314812	0.0444412360450618	0.0454522226316484	-0.0446583697318574	0.0466164031930463	0.047272267148864	0.16604491576298	0.0995576014540895	5.67451505222103	0.224336245167586	0.983727503546102
787	3	A	EMS	EMS	1	1	1	9	B	7	B07	1	3	1	9	17	2	16699	13239	5099	4678	0.215767204950073	56	5.66462975496041	0.0817670764149758	5.27039814117866	0.112507663903498	0.929782550238305	0.0124368137997501	0.0127023648395404	0.788550006984121	0.0249323520448109	0.0249271878031311	0.929736580291319	0.012636973788914	0.0125526583421845	5.66469166477149	0.081635059960561	0.967997063501834	0.0458854402935461	0.0457970323959839	-0.0325262252959854	0.0474371824611268	0.0472544129024663	0.191291656449755	0.0978119949254722	5.68353354911946	0.249582985854361	0.996101084852774
790	3	A	SHAM	SHAM	1	1	1	9	B	10	B10	1	3	1	9	17	2	17507	13463	5724	5045	0.0867168349180116	55	5.65637326393135	0.0892944623394888	5.27116990497947	0.118524826046373	0.931766777674373	0.0127407171485236	0.0131615001897488	0.792910607911127	0.0245486221089196	0.024543692606169	0.931568343206363	0.0128101934324202	0.012982649326414	5.65626297556913	0.0892731730876016	0.974752223392584	0.0474293975171693	0.0480190734467005	-0.0255719701345133	0.0488678430718969	0.0492098891721307	0.205616048450476	0.101099160901008	5.6751048599171	0.263907377855083	1.00326171488566
791	3	A	EMS	EMS	1	1	1	9	B	11	B11	1	3	1	9	17	2	11759	8692	3572	3144	-0.0109340673599876	55	5.64464534325687	0.0862553590832376	5.21828993018202	0.117744013762631	0.924622623391668	0.0121927088558848	0.0123780912418438	0.684196309873842	0.0425936970167737	0.0425679668638249	0.92447421144761	0.0117502917625047	0.0118800013063326	5.64466910854055	0.0866967761247122	0.949120275463901	0.041171545141881	0.0417418111601377	-0.0522197492438436	0.0435830967063957	0.043868745959533	0.150139914628552	0.0928962200715827	5.66351099288852	0.208431244033158	0.976091240891268
792	3	A	EMS	EMS	1	1	1	9	B	12	B12	1	3	1	9	17	2	20691	16685	7606	7158	0.505073185816848	55	5.6491600345846	0.077148712697688	5.184641750243	0.124223509277486	0.917508032422636	0.013254091906629	0.0136725077656265	0.503705129509259	0.0732503417109876	0.0731197508892156	0.917302696717119	0.012276031811881	0.012592153777439	5.64943554839156	0.0772548131863495	0.924614407164239	0.0408278616786953	0.0421744049188228	-0.0783784855231665	0.044137399624213	0.0453090450966898	0.0940586458101619	0.0992730815284402	5.66827743273953	0.152349975214768	0.95011443806697
793	3	A	EMS	EMS	1	1	1	9	C	1	C01	1	3	1	9	17	3	17605	13732	6181	5554	0.00962575873786076	56	5.65420013260368	0.0994842271388248	5.2639353552846	0.126771977622195	0.930226035673559	0.0132244868076746	0.0134857274458516	0.799378383442583	0.0231416732981332	0.0231375435506033	0.929865653411132	0.0130241475842316	0.0132877747110318	5.65425830636607	0.0996617284273473	0.968469895951232	0.0479453636318029	0.0486501842236337	-0.0320378798612147	0.049478651949278	0.0500973037253669	0.192301008934765	0.10380085064122	5.67207749169356	0.249489064249908	0.996054471973359
795	3	A	EMS	EMS	1	1	1	9	C	3	C03	1	3	1	9	17	3	16857	13161	6182	5668	0.368792405713067	55	5.64991968935042	0.0840754092901434	5.27568558450287	0.122135944316202	0.933120177826649	0.0128107508213263	0.0128146973578603	0.700427781555793	0.041185080331223	0.041161817808263	0.93287107952141	0.0124441927668452	0.012358681285324	5.64991771155769	0.0844512680070669	0.979615665536371	0.0466901941348548	0.0464337815398613	-0.0205949624211548	0.047625012209186	0.0472383135366787	0.215803451402375	0.096770613887717	5.66773689688518	0.272991506717518	1.00785622487969
796	3	A	EMS	EMS	1	1	1	9	C	4	C04	1	3	1	9	17	3	17104	12537	5561	4721	-0.188579967122589	56	5.67149034498009	0.0976807117536178	5.31343481892598	0.127809054784557	0.936133395130971	0.0133096595661613	0.0138405622824953	0.801984045074435	0.0236532801603503	0.0236488704798939	0.935925625853435	0.0133939574848188	0.0136421120141199	5.67144686377202	0.0975967708364269	0.991215223122211	0.0516241961698898	0.0522227070002008	-0.00882359051011019	0.0521077318900058	0.0525902557765987	0.239690013170681	0.1062661680843	5.68926604909951	0.296878068485824	1.02013847344091
797	3	A	EMS	EMS	1	1	1	9	C	5	C05	1	3	1	9	17	3	15790	12279	5619	4912	-0.0503308416754784	55	5.65334857108872	0.0983548809909669	5.28201113367003	0.133647309118584	0.933982652003291	0.0140145171503133	0.0153084600065187	0.772781937602437	0.0285142004555027	0.0285064763081982	0.933644518481674	0.0140972521762459	0.01505997160146	5.65322080896841	0.0982858503303625	0.982526634463065	0.05315774357335	0.0557485865382093	-0.0176278268882001	0.0540668682178678	0.0570338965545129	0.221851746596962	0.115482602295909	5.6710399942959	0.279039801912105	1.01093851863504
798	3	A	SHAM	SHAM	1	1	1	9	C	6	C06	1	3	1	9	17	3	15097	12203	4875	4544	0.248582469377302	55	5.6530783418404	0.0770137100298989	5.27403422222943	0.107672082084886	0.93251726273012	0.0115753471928967	0.0119768295905982	0.759028556503175	0.030689244998233	0.0306796157577099	0.932299618144128	0.0115291226770248	0.0117624768898061	5.65283951035578	0.0771553414634046	0.977476155101086	0.0429927617410457	0.0442111753939896	-0.0227813811786975	0.0441036357332677	0.0449765594995227	0.211334620884182	0.0925512506816241	5.67065869568327	0.268522676199324	1.00559079373966
800	3	A	EMS	EMS	1	1	1	9	C	8	C08	1	3	1	9	17	3	15611	12349	5259	4803	0.200902152545137	56	5.66116217613676	0.086971687372623	5.28517685346047	0.118938828024472	0.933162904167525	0.0124672047073849	0.0125775528713862	0.772463652989856	0.0283862652539892	0.028378644575872	0.932843288398594	0.0122464919219498	0.0123410799299224	5.66105635823784	0.0870959609988637	0.979511395935865	0.0459776611265858	0.0465179568172241	-0.020701407223297	0.0468987912309251	0.0472473814910916	0.215586124073056	0.0969671112164251	5.67887554356533	0.272774179388199	1.00774581850071
801	3	A	EMS	EMS	1	1	1	9	C	9	C09	1	3	1	9	17	3	15299	10657	4957	3899	-0.302440029541853	56	5.66180133128474	0.102139485330614	5.28256547192827	0.138368812732483	0.932321357626422	0.0137997099628708	0.0147642114051413	0.738278327598408	0.0342723134695337	0.0342589042627751	0.932181369706341	0.0135725730503809	0.0143176310650149	5.66154588227517	0.102085827790844	0.977034634129412	0.0507913755139416	0.0533965500402877	-0.0232331781005154	0.0518248483047421	0.0544367790699541	0.210409917709067	0.111883236863376	5.67936506760266	0.26759797302421	1.00512328708874
802	3	A	EMS	EMS	1	1	1	9	C	10	C10	1	3	1	9	17	3	18506	14427	9392	8606	-0.239177960793454	51	5.51077750996239	0.14285971813556	5.25617393630379	0.205852160103607	0.953674783192309	0.0141262400550403	0.0136579234431788	0.658226711972174	0.0536127743655091	0.0535614958436688	0.953392075962201	0.011692906196681	0.0116859826242334	5.5109058474755	0.143277054631783	1.06313910714035	0.0512963283557211	0.0518418231147385	0.0612259532995798	0.0481775450704822	0.0484620771400774	0.376277711834232	0.0920230498021102	5.52872503280299	0.433465767149375	1.09629543153713
803	3	A	EMS	EMS	1	1	1	9	C	11	C11	1	3	1	9	17	3	17259	13677	5874	5420	0.379683876101752	56	5.66932478518161	0.0777413606700423	5.27658587058193	0.106410421832586	0.930034496202913	0.0117363749275353	0.0119978734501026	0.799561939784752	0.0230137734848404	0.0230097118182763	0.930022911862049	0.011739614639304	0.0118679099557102	5.66923871542777	0.0778326956147372	0.969046624528925	0.0431504393320807	0.0436570234901316	-0.0314425521270933	0.0445326066478489	0.0448814188089472	0.193530770253726	0.0930328803746463	5.68705790075526	0.250718825568869	0.996665143862452
805	3	A	EMS	EMS	1	1	1	9	D	1	D01	1	3	1	9	17	4	17697	13198	5886	5187	-0.0740509600643562	56	5.67420691106476	0.0996096789035047	5.28229122528172	0.138152933218564	0.930176102921813	0.0135606411290942	0.0140623143067143	0.756765000862453	0.0305612933714501	0.0305517840253822	0.92987161967554	0.0135638398175017	0.0137103678100844	5.67433525886994	0.0995261551323803	0.968491763503917	0.0495539491722858	0.0502548592724207	-0.0320153005554343	0.0514330495447024	0.0517095529384411	0.192347664824262	0.10721960974942	5.69483399560776	0.246658322113766	0.994651639533687
806	3	A	SHAM	SHAM	1	1	1	9	D	2	D02	1	3	1	9	17	4	16539	13167	5375	4909	0.151070230340407	55	5.65960153145398	0.0840013543665019	5.27881531209983	0.114341862034749	0.932371213811873	0.0127666171893959	0.0130321818743214	0.765923616283327	0.0294097732152152	0.0294012984344755	0.932236763014058	0.0128489709474489	0.012815579855792	5.65965976256265	0.0840071159305383	0.977241413151939	0.0477842634139379	0.0477601537271399	-0.0230215610942212	0.0490151738181201	0.0487643654367588	0.210843093558731	0.100029803197381	5.68015849930047	0.265153750848236	1.0038896294146
807	3	A	EMS	EMS	1	1	1	9	D	3	D03	1	3	1	9	17	4	16856	13389	5847	5372	0.161056471178499	56	5.66289423415216	0.0931995944561482	5.28202020445424	0.119011125306935	0.932415248067455	0.0126806149799809	0.0128793264684582	0.806436292923484	0.0222463902617514	0.0222427214243347	0.932301792523685	0.0124689033854284	0.0127166670082632	5.66279254462516	0.0931916378137348	0.977484278607595	0.0466971171291577	0.0472096000139697	-0.0227730709646988	0.0477219263862041	0.0482976847608516	0.211351626410226	0.0988264434228308	5.68329128136298	0.265662283699731	1.00414604980993
808	3	A	EMS	EMS	1	1	1	9	D	4	D04	1	3	1	9	17	4	16373	11992	5599	4692	-0.167949197725526	56	5.66498729973673	0.0969281498401555	5.30886628732879	0.133303689102571	0.936561767830503	0.0137668573297434	0.0141662821195469	0.782276463466305	0.0272348897183527	0.0272281589849686	0.93661757608019	0.0135166548102303	0.0139117876045038	5.66497446530358	0.0969993963037429	0.993881601173145	0.0523288743283965	0.0536105680668442	-0.00613719307571144	0.0527995377939263	0.0538051410180722	0.245101066831349	0.108501579071974	5.6854732020414	0.299411724120853	1.02145854871311
810	3	A	EMS	EMS	1	1	1	9	D	6	D06	1	3	1	9	17	4	15400	11066	5215	4310	-0.114747817549635	56	5.66233135286661	0.0922623421714662	5.29326971848256	0.131694348495215	0.934089869417434	0.0135821229976031	0.0139062513317333	0.711761253105703	0.0392645012198332	0.0392443418234092	0.933505063061866	0.0130864085271868	0.0134292437597034	5.66217255522315	0.0925042975812133	0.982000470104512	0.049410651979934	0.050933914160758	-0.0181634929167871	0.0502918843922204	0.0515426685011583	0.220761208320499	0.105624184258905	5.68267129196097	0.275071865610003	1.00891430145738
811	3	A	EMS	EMS	1	1	1	9	D	7	D07	1	3	1	9	17	4	16639	12991	6138	5627	0.293828231719531	56	5.65341996047504	0.0866399757346869	5.23628023627563	0.119531267376045	0.925932705776426	0.0126010169937285	0.0129711545969784	0.769792746317783	0.0276186733959743	0.027611654181936	0.925816204587207	0.0125805281184716	0.0127646955513274	5.65340285624804	0.0868951268997967	0.953860635182954	0.0444116442473061	0.0452730096354684	-0.0472377029191466	0.0467418551346454	0.047346547036662	0.1606343054124	0.0997030546604749	5.67390159298586	0.214944962701904	0.979203910674517
812	3	A	EMS	EMS	1	1	1	9	D	8	D08	1	3	1	9	17	4	16260	12740	5477	5050	0.25202255138471	55	5.65253158554957	0.0816643898728197	5.2790826257335	0.109843090294468	0.93332719375389	0.0122756586589081	0.0124418150185611	0.804687014959485	0.0227579761116713	0.0227540483536288	0.933126603186126	0.0122548021276142	0.0123086796120148	5.65268418883803	0.0819928569207426	0.980575425126718	0.0462207780136502	0.0463386207266725	-0.0196157111439111	0.0470364692802208	0.0470949709722862	0.217801646678574	0.0963795157649987	5.67318292557585	0.272112303968078	1.00740972108968
813	3	A	EMS	EMS	1	1	1	9	D	9	D09	1	3	1	9	17	4	16271	12804	5423	5002	0.299708438446951	56	5.67704501726475	0.0805920697862568	5.29623505288106	0.112250013646282	0.932388937460957	0.0130327793942251	0.0131229725646397	0.750900523214749	0.0319688171741239	0.0319579330809489	0.932079324264635	0.0126245148197004	0.0128737362905828	5.67701204898295	0.0809048447596263	0.976653941067756	0.046935447037329	0.0484599000562738	-0.0236228955621382	0.0481282602361974	0.0492355956552088	0.2096119229176	0.101620400709083	5.69751078572077	0.263922580207104	1.00326936901706
815	3	A	EMS	EMS	1	1	1	9	D	11	D11	1	3	1	9	17	4	15773	13498	5851	5560	0.445265726127459	54	5.61440044414681	0.0832590174225766	5.25631235872042	0.11193549535089	0.936172416544829	0.0131607552175879	0.0135008637212246	0.83353009296946	0.0182819741121917	0.0182799377222924	0.936092880775366	0.0131663714639429	0.0134264628144658	5.61444589987502	0.0833692615605201	0.991858406553367	0.0508273140220963	0.0517630468355167	-0.0081749176582874	0.051163417041307	0.0519654356017615	0.24099794901802	0.105193145718337	5.63494463661284	0.295308606307524	1.01932243444837
816	3	A	EMS	EMS	1	1	1	9	D	12	D12	1	3	1	9	17	4	17751	14102	7084	6497	0.238551637871979	55	5.63274369036069	0.0952016102441785	5.23655489489738	0.172518904018496	0.931022279725756	0.0202335476158769	0.024443367546873	0.43289988919081	0.0884333493440119	0.0882038953034237	0.92999872245305	0.0195126121871059	0.023177099027846	5.63215277439075	0.0953632529820042	0.968957866255798	0.0723899109017798	0.0796616297286395	-0.0315341497128893	0.0743871378299223	0.0839712851320589	0.193341608965019	0.169790615847181	5.65265151112857	0.247652266254524	0.995143756667351
817	3	A	EMS	EMS	1	1	1	9	E	1	E01	2	3	1	9	18	1	18280	13510	5786	4943	-0.141415276874553	56	5.66319190916089	0.098500410060026	5.2833622970713	0.137070913972988	0.932611964120751	0.0138871238774833	0.0145384129405361	0.719674624602977	0.037600233743328	0.0375825293031879	0.932429006193345	0.0136611745841079	0.0140560285682186	5.6632225362446	0.0986647847904559	0.977959737630341	0.0511537824992995	0.0523680490357261	-0.0222867778618833	0.0523604256258885	0.0534433171315067	0.212346435856972	0.109515905844988	5.68625512030237	0.259107231475783	1.00085073055865
818	NULL	A	NULL	NULL	1	1	1	9	E	2	E02	2	3	1	9	18	1	13698	9799	4166	4019	0.132722621502181	57	5.68829521144816	0.0990793590014044	2.89707700320942	0.188896085972499	0.508558282523528	0.0326699365207782	0.0353997580682945	0.67584975467342	-0.0294097732152163	-0.0294012984344755	0.508833948588456	0.0324723196913901	0.0352952886108963	5.68837897140397	0.0987572272857597	0.517199533533552	0.00446763300203407	0.00466476704256211	-0.659326533992126	0.00865142465959074	0.00900189441979579	-3.10016831646956	0.267822859921799	5.71141155546174	-3.05340752085075	0.518033325589552
820	3	A	EMS	EMS	1	1	1	9	E	4	E04	2	3	1	9	18	1	16111	12016	4842	4211	0.0199206520989161	56	5.66328055858737	0.0795385474583804	5.28762036292554	0.120356816374535	0.934011193539808	0.0138107700664041	0.0141849826328606	0.664499741026059	0.0475892814642711	0.0475534044244578	0.933984017751519	0.0132054195270554	0.0136915913088078	5.66345590589184	0.0795780895739501	0.983809968186954	0.0502719857082447	0.0518136388114737	-0.0163225223415182	0.0511138559923335	0.0524763051904496	0.224506631388091	0.107046825479325	5.68648848994961	0.271267427006902	1.00698101939588
821	3	A	EMS	EMS	1	1	1	9	E	5	E05	2	3	1	9	18	1	15477	12236	5419	4876	0.130650379256583	56	5.66791875233688	0.0919102801423587	5.31370169231567	0.12272721568224	0.936832265955766	0.0131716960842993	0.0135074145999599	0.796967691575839	0.0246765312791862	0.0246715243384827	0.936765680364461	0.0131275712273256	0.0133227112791807	5.66785233964547	0.091751476994166	0.994454186499368	0.0501676759053667	0.0514694198965751	-0.0055612486244121	0.0508887285198609	0.051612583288414	0.246259242254411	0.104047568077527	5.69088492370324	0.293020037873222	1.01813479052852
822	3	A	EMS	EMS	1	1	1	9	E	6	E06	2	3	1	9	18	1	15403	11293	5164	4145	-0.281697538679842	55	5.65359259635428	0.0981752582918279	5.29225163975752	0.136552748077816	0.935329844480319	0.01469096430874	0.0150717235983379	0.755314620585328	0.0318408553193368	0.0318301013486247	0.935342102405808	0.0145868514797745	0.0147302602550238	5.6536140196331	0.0982637347804202	0.988977846434584	0.055599603492968	0.0561716289933383	-0.0110833475753395	0.0564425610100951	0.0566542021445826	0.23512685787911	0.114824460146568	5.67664660369087	0.281887653497921	1.01239629081587
823	3	A	EMS	EMS	1	1	1	9	E	7	E07	2	3	1	9	18	1	14536	11366	4991	4403	0.104486955429268	55	5.65452595537438	0.0934029996639694	5.28651709607881	0.120357588659266	0.93455325578885	0.0131021553510763	0.0131878443344006	0.787062939857491	0.0260835863333823	0.0260776733940483	0.934348582506227	0.0128861771625034	0.0129623870104418	5.65451940084876	0.0931812110724809	0.985191850724925	0.0491329591843432	0.0492756042136913	-0.014918884466143	0.0497772809260613	0.0498263816611197	0.227357528976405	0.101513436127099	5.67755198490653	0.274118324595216	1.00842905448012
825	3	A	SHAM	SHAM	1	1	1	9	E	9	E09	2	3	1	9	18	1	15858	11370	5001	4256	-0.0904414989539388	56	5.66241072826116	0.0873554825905824	5.29116229568144	0.130153987964648	0.933649436964491	0.0142358258337173	0.014435979472536	0.669982899209234	0.0465643610837507	0.0465307505658601	0.933105930266273	0.0139299024662071	0.0138327281025507	5.66262298534884	0.0876007869498503	0.980497706651732	0.0524240124846541	0.0522712791315709	-0.0196949730066585	0.0533978923133121	0.0529789322881418	0.217639987260654	0.108736405589458	5.68565556940661	0.264400782879465	1.00351019551657
826	3	A	EMS	EMS	1	1	1	9	E	10	E10	2	3	1	9	18	1	16561	11536	4979	4017	-0.360511463311216	56	5.67506676216733	0.0987135521266207	5.31103296979104	0.129949764443169	0.93502663293331	0.014064065266804	0.0142686205627696	0.771028487396526	0.0288980116727565	0.0288899715051714	0.934874728380772	0.0138070517347883	0.0139598293454094	5.67498080987419	0.0986013555727473	0.987193164970194	0.0523609637197285	0.0528970491334418	-0.0128895495075411	0.0532063142778025	0.0535422541491103	0.231471991456588	0.108526582521559	5.69801339393196	0.278232787075399	1.01052617428742
827	3	A	EMS	EMS	1	1	1	9	E	11	E11	2	3	1	9	18	1	17532	14386	6236	5690	0.293551329760293	55	5.65268669927	0.0768234023336735	5.25968584016152	0.109822124610059	0.929830150816293	0.0120653404522644	0.0124776894099289	0.705709073953278	0.039648593454146	0.0396278370203767	0.92952515114775	0.0121250864845089	0.0121059825076635	5.65259882354093	0.0769328463152712	0.967223569383313	0.044238661155937	0.0445043692994705	-0.0333256122195041	0.0457712904783276	0.0457580923102219	0.189638283716154	0.0952084469604492	5.6756314075987	0.236399079334966	0.989600607726308
828	3	A	EMS	EMS	1	1	1	9	E	12	E12	2	3	1	9	18	1	17227	13358	5652	4977	-0.066612273956161	56	5.67258362637018	0.0951628270731602	5.29666299684952	0.124390535303129	0.932593226365279	0.0133013063726349	0.0134380616928417	0.827436435437376	0.0185377242283498	0.0185356011869615	0.932449814224392	0.0130510781170084	0.0133168737840919	5.67266285224162	0.0952324959694273	0.978037552474743	0.0490783770621976	0.0496605244052461	-0.0222072124710351	0.0501343699568223	0.0506824545197129	0.212509154728621	0.103836834127457	5.69569543629939	0.259269950347432	1.00093227050265
830	3	A	EMS	EMS	1	1	1	9	F	2	F02	2	3	1	9	18	2	15380	12205	5216	4704	0.136997548445327	56	5.67535666975157	0.0922815201389432	5.32283720696851	0.127943519049286	0.936953456392055	0.0138589863874082	0.0140764803543543	0.819407163299814	0.0207117014722155	0.020708740636449	0.936634613821577	0.0137899669097614	0.013944277022791	5.67529387436524	0.0923037274715499	0.993947436751764	0.0532143423793164	0.054142752112585	-0.00607095428277265	0.0535253337496549	0.0541415333073626	0.245234301539393	0.109564059219967	5.69615018605762	0.288775994104197	1.01593954099878
831	3	A	EMS	EMS	1	1	1	9	F	3	F03	2	3	1	9	18	2	15207	11442	5190	4538	0.0672241462331824	56	5.65730019429758	0.0955951641787037	5.28185910475564	0.140016746600306	0.933477203805233	0.0147061917669768	0.0147864407615082	0.701929643929821	0.0409289858983984	0.0409061543436114	0.933054694118333	0.0140736488532126	0.0142757681708277	5.65706771420224	0.0957122446651179	0.980305137994007	0.0525360673430138	0.0543478139372513	-0.0198913909507497	0.053651086971399	0.0548718580042821	0.2172393194535	0.113101387466529	5.67792402589462	0.260781012018304	1.00169011163297
832	3	A	EMS	EMS	1	1	1	9	F	4	F04	2	3	1	9	18	2	17031	13138	5936	5074	-0.020918830721798	56	5.6615405748913	0.0952110553873084	5.3047478829419	0.132318965360949	0.936565677050412	0.0138821858760345	0.0147648132620613	0.770061052694119	0.0294097732152152	0.0294012984344755	0.936329885536001	0.0139654066725961	0.0144994129910869	5.66182498485161	0.0953936312440293	0.992771254619456	0.0536157305492006	0.0561894450713421	-0.00725499936913382	0.0542413540122419	0.056221418295232	0.24285132526665	0.113977058073453	5.68268129654399	0.286393017831454	1.01471101459621
833	3	A	EMS	EMS	1	1	1	9	F	5	F05	2	3	1	9	18	2	15997	12823	5952	5403	0.206994994859631	55	5.66280409102131	0.0925461756030943	5.30266420730375	0.121293185095306	0.936047225765425	0.0127042604436542	0.0129960534604755	0.78616782885828	0.0264673463001815	0.0264611685910191	0.935959174370639	0.0127276286789694	0.0127753929276855	5.66272484348342	0.0925598310330972	0.991344167258053	0.0485845446738597	0.04900548601194	-0.00869351205026737	0.0491706995637531	0.0493365732847527	0.239952362686238	0.0996933991725715	5.6835811551758	0.283494055251041	1.01322041679328
835	3	A	EMS	EMS	1	1	1	9	F	7	F07	2	3	1	9	18	2	17191	13830	5245	4920	0.285409822507724	55	5.65221248371414	0.0739113754110659	5.26087718686307	0.106793725293548	0.931109555852716	0.0124957337202964	0.012516790964701	0.743182003356778	0.0332484939370942	0.0332362504041903	0.931059920340419	0.0122059777494014	0.0123026400577081	5.65228459465061	0.0740226619581837	0.972867554225642	0.0455362749874515	0.0454462541247313	-0.027507327207268	0.0466799464937921	0.0466174191557083	0.201640180393134	0.0960635353031948	5.67314090634299	0.245181872957938	0.993921529047191
836	3	A	EMS	EMS	1	1	1	9	F	8	F08	2	3	1	9	18	2	16654	12867	5996	5459	0.254148645517423	56	5.64962688684053	0.0908771290359603	5.27163950807719	0.122416570694152	0.933050297605056	0.0129583314732671	0.0132951942821843	0.729301183856009	0.0360641716400127	0.0360485485153143	0.932919038398539	0.012597946581748	0.0129215602092711	5.64954426023902	0.0908987813775934	0.97979565504077	0.0474294522694733	0.0485620799893143	-0.0204112443243703	0.0483659611860787	0.049377580648357	0.216178489323317	0.101168158619257	5.6704005719314	0.25972018188812	1.00115795488402
837	3	A	EMS	EMS	1	1	1	9	F	9	F09	2	3	1	9	18	2	16716	11353	5357	4063	-0.426090527429992	56	5.66579386507446	0.109246831351556	5.30553407868605	0.148768656236528	0.936020992828151	0.0144547013534851	0.0152443756495598	0.770116172140399	0.0292818313970857	0.029273466702153	0.935410911987742	0.014300772711811	0.0148580524050441	5.66571001741429	0.109196108542159	0.989241149134745	0.0549529362920736	0.0568396290306738	-0.0108171458026279	0.0555660368593002	0.0572157525561817	0.235664949037555	0.116127463011637	5.68656632910667	0.279206641602359	1.01102380691578
838	3	A	EMS	EMS	1	1	1	9	F	10	F10	2	3	1	9	18	2	17131	12037	5279	4089	-0.426535708508161	56	5.66921085141227	0.09640925458277	5.30469513222702	0.131953075643142	0.934913464182829	0.0136112430905198	0.0145735065249586	0.750773668479066	0.0324806750939404	0.032469260010241	0.934351361573101	0.0131031395231997	0.0141851665271563	5.66925132565632	0.0966513843012446	0.98520239991417	0.0499296146437305	0.0537259407486953	-0.0149081767722474	0.0507845250042177	0.0543688564663904	0.227379261288557	0.11067923807154	5.6901076373487	0.270920953853361	1.00680531905192
840	3	A	SHAM	SHAM	1	1	1	9	F	12	F12	2	3	1	9	18	2	17573	12947	5359	4675	-0.102324133117517	55	5.66448872341038	0.0899632794302946	5.28663832335855	0.127168756603569	0.932369989184036	0.0137469423922772	0.0142440832653634	0.730985015143955	0.0355521890630289	0.0355372215860126	0.932355895837502	0.0135176589940403	0.0138712414416676	5.66438360963841	0.0899432622654949	0.977686430547156	0.0503185413793186	0.0520148462221016	-0.0225662835203318	0.0515703697695428	0.0529106772328945	0.211774712632323	0.108839470478684	5.68523992133079	0.255316405197127	0.998954862430754
842	3	A	EMS	EMS	1	1	1	9	G	2	G02	2	3	1	9	18	3	16836	13137	5900	5275	0.0303987663460861	56	5.65814786776423	0.097414193449935	5.28955328007291	0.129296639505194	0.934576408391511	0.0128935502582876	0.0133668184821884	0.826793038287657	0.0190492317667978	0.0190469281162339	0.934380978904952	0.013003381992329	0.0132354601097163	5.65811927720264	0.0974400853102767	0.985314839964231	0.0491972604490146	0.0501080751917598	-0.0147940544008134	0.0499280169436249	0.0507640620738104	0.227610868921644	0.103202273923731	5.67899733010894	0.269150726134166	1.00590856658849
843	3	A	EMS	EMS	1	1	1	9	G	3	G03	2	3	1	9	18	3	16719	12944	5619	5018	0.100988001865121	56	5.66355864718924	0.0916005955335302	5.31432235583176	0.124134639141631	0.937866026911147	0.0140100622942431	0.0139512289183598	0.795935754023584	0.0250602636485458	0.0250550195354573	0.937632312540987	0.0138836402005357	0.0137764468644268	5.66369266353849	0.0916054751873791	0.99781799711397	0.053987742991429	0.0538095457984623	-0.00218438692294218	0.0542217889270584	0.0536657078086113	0.253036308715491	0.108043524785061	5.68457071644479	0.294576165928012	1.01894204150742
845	3	A	EMS	EMS	1	1	1	9	G	5	G05	2	3	1	9	18	3	16998	13603	5915	5399	0.126182078625618	55	5.65375745259591	0.103337014483898	5.30016053695135	0.141814510591685	0.93661652520534	0.0152156849395772	0.0153118855018544	0.804332875426745	0.0233974751990567	0.0233932070152468	0.936522459828036	0.0153303644387717	0.0151283286536986	5.65369821986871	0.103453430745111	0.99351422172338	0.0586011229251691	0.0589211754501268	-0.00650690232333998	0.0591251742628302	0.0587927300096852	0.244357256827236	0.119338365256651	5.67457627277501	0.285897114039758	1.01445572273703
846	3	A	EMS	EMS	1	1	1	9	G	6	G06	2	3	1	9	18	3	15882	12436	5248	4725	0.130779922262937	56	5.66075451960709	0.0878500436911829	5.29376461585032	0.122003367644526	0.934387292882507	0.0130882660845049	0.0133435771367952	0.816419498771399	0.0208395883804014	0.0208365723687822	0.934259807537831	0.0130570948840958	0.0132202830590466	5.6607489843943	0.0879013129041067	0.984854986296431	0.0495645029005643	0.0500777464287436	-0.0152608706823555	0.050117151802294	0.0507207959398123	0.226663308429751	0.103237586521631	5.6816270373006	0.268203165642273	1.0054292083613
847	3	A	EMS	EMS	1	1	1	9	G	7	G07	2	3	1	9	18	3	16893	13232	6008	5366	0.0554735262752133	56	5.66547169872105	0.0984996437211392	5.28994106057191	0.13026453184502	0.933322803156233	0.0134604823557583	0.0136422341656397	0.793518613571399	0.0246765312791862	0.0246715243384917	0.933410744167386	0.0132830718228961	0.013440377618542	5.66542643909954	0.0985157210000441	0.981644928805057	0.0501559001957332	0.0505205113131704	-0.0185256162890534	0.0510202201437281	0.051357997244374	0.220023632749985	0.104844192271322	5.68630449200584	0.261563489962507	1.0020829972163
848	3	A	SHAM	SHAM	1	1	1	9	G	8	G08	2	3	1	9	18	3	16897	13091	5864	5242	0.0728672446200029	56	5.67201330054872	0.0928091796619487	5.30519869429216	0.123028844980773	0.934880728286133	0.0127689537742616	0.012850988790493	0.815952925705654	0.0209674759699477	0.0209644041010976	0.934599929930778	0.0127549135357564	0.0127021145664048	5.67189233309034	0.0926763045256458	0.986146880007475	0.0485335889743365	0.0482097665369998	-0.0139499699496531	0.0493167582661407	0.0487931650816698	0.229323066671135	0.0991226664713185	5.69277038599664	0.270862923883656	1.00677589736785
852	3	A	EMS	EMS	1	1	1	9	G	12	G12	2	3	1	9	18	3	16922	12826	5509	4694	-0.189174359511954	56	5.66714884029451	0.105520700601807	5.29829728334192	0.132418622795349	0.934281873385659	0.0138924266762023	0.0140850973557354	0.821254023505023	0.0199443940976081	0.0199417502424843	0.934123790624042	0.0139404652843335	0.0139225968999252	5.66715643329035	0.105500701907149	0.98433931305914	0.0528259446545859	0.052583949430367	-0.0157846117651556	0.0535799808114616	0.0533114582074813	0.225599658765903	0.108519605205835	5.68803448619665	0.267139515978425	1.00489166299383
853	3	A	EMS	EMS	1	1	1	9	H	1	H01	2	3	1	9	18	4	16634	11015	5051	3895	-0.396756861358958	56	5.67469400161235	0.11887156411681	5.30383298750973	0.185576524219715	0.933661060198776	0.0176851741864877	0.0187477986843042	0.628697475086751	0.0537409744076731	0.0536893275759975	0.933256875429152	0.0169705491461607	0.0175868178150671	5.67469923477377	0.119146093944437	0.9810654728898	0.0636024843961315	0.0664329308666061	-0.019116080675658	0.0648597181709351	0.0671660450233885	0.218820376020755	0.138032902907394	5.69194557527918	0.258663661082909	1.00062852066866
855	3	A	SHAM	SHAM	1	1	1	9	H	3	H03	2	3	1	9	18	4	17916	14018	6254	5669	-0.0154156975642517	55	5.664368340248	0.101631152541883	5.29757012368159	0.137367126078135	0.9344039047063	0.0140577095154025	0.014372506062048	0.789555140284505	0.0255719183006826	0.0255663464647592	0.934062508574995	0.0140032358176758	0.0141284904556387	5.66433221187387	0.101564849891316	0.984107154917719	0.0527221509147364	0.0536906326536117	-0.0160204905846567	0.0538742350426474	0.0542629327543132	0.225120429887431	0.110856624723087	5.68157855237928	0.264963714949585	1.00379384000329
856	3	A	EMS	EMS	1	1	1	9	H	4	H04	2	3	1	9	18	4	16791	12977	5108	4578	0.11656566691293	55	5.66421216841842	0.0831952849771486	5.29066554864152	0.121722121518607	0.933110102911676	0.0132673248306056	0.0137723800807632	0.735359785346506	0.0349122369864168	0.0348980629243937	0.933165905745247	0.0133241202678894	0.0134580534789127	5.66440084252713	0.0833737937823296	0.98072321783698	0.0500677909414501	0.0505199112170177	-0.0194650021356579	0.0512153004204514	0.0513802527476739	0.218108992922124	0.105043875677498	5.68164718303254	0.257952277984278	1.00027235374322
857	3	A	EMS	EMS	1	1	1	9	H	5	H05	2	3	1	9	18	4	19227	14936	6776	6187	0.183540837431012	55	5.64875216282602	0.0822392084992787	5.26612581568174	0.12157873927155	0.931904541743248	0.0127035339586803	0.0129247156657181	0.665979315434358	0.0470768089382505	0.0470420774951573	0.93162740856203	0.0123378957228209	0.0123515091035345	5.64877850535266	0.0823254335040493	0.974971658588833	0.0458207809905362	0.0458442464635892	-0.0253468765207928	0.0470923503738158	0.0469177669383408	0.206077939727262	0.0964757174777486	5.66602484585807	0.245921224789415	0.99428700697609
858	3	A	EMS	EMS	1	1	1	9	H	6	H06	2	3	1	9	18	4	17253	13244	6099	5311	-0.207819894134741	56	5.66884233834754	0.110103090614904	5.29397654220161	0.143647700714101	0.932874497806491	0.0142705059900572	0.0143567342654766	0.803863119289547	0.0227579761116713	0.0227540483536288	0.932375341299764	0.0144056105841316	0.0141225338007612	5.66875572260868	0.110047871034742	0.977759107904594	0.053777560650535	0.0527583619592361	-0.0224919502228384	0.0550398493386921	0.0537813290052733	0.211926776211572	0.110378468534565	5.68600206311409	0.251770061273725	0.997187759629555
860	3	A	EMS	EMS	1	1	1	9	H	8	H08	2	3	1	9	18	4	16011	11304	4704	4041	-0.00428673254237344	57	5.69806050861531	0.0860905880841027	5.3543908308965	0.114557163716853	0.938026263148958	0.013427527066945	0.0137214656192025	0.841140666098818	0.0170032587234994	0.0170016203990647	0.937880075260432	0.0136068929919541	0.0136393252347712	5.69810713685744	0.0861613869771856	0.998783879552885	0.0527585142444523	0.0531570479746415	-0.00121686052166004	0.0531024143390276	0.0530629699180304	0.254973814001497	0.106526786147443	5.71535347736285	0.29481709906365	1.0190671393917
861	3	A	EMS	EMS	1	1	1	9	H	9	H09	2	3	1	9	18	4	16659	13164	6593	5631	-0.0333760599168622	54	5.63031903349615	0.106166115023065	5.22012640127667	0.142088559978122	0.926594829134513	0.0127113410486047	0.0132422179916341	0.71273123320473	0.0379842766737472	0.0379660245001649	0.925952984019663	0.012067894781364	0.0125352800484575	5.63033635282179	0.105993509874531	0.954346584438354	0.0431497151569085	0.0446677195829839	-0.0467283774529096	0.0451248443120139	0.046608371205629	0.161703921026867	0.0982648851455597	5.6475826933272	0.201547206089021	0.972823571486293
862	3	A	EMS	EMS	1	1	1	9	H	10	H10	2	3	1	9	18	4	17760	13445	5856	5081	-0.166254222896437	56	5.68431473174385	0.102218956801599	5.3106232249381	0.132528134798393	0.933241307920065	0.0136192474172715	0.013836695845589	0.832228300875266	0.0177704810187049	0.0177686107930087	0.933024378614432	0.0137550013510843	0.0137104193011771	5.68435255342501	0.102402531453681	0.980191234256598	0.051514921840463	0.0512391735288957	-0.0200075893577385	0.0525964011824037	0.0522311980584231	0.217002250160214	0.106657383816882	5.70159889393042	0.256845535222368	0.999718746266423
863	3	A	EMS	EMS	1	1	1	9	H	11	H11	2	3	1	9	18	4	17266	12907	5655	4926	-0.164616189850656	56	5.67582185890088	0.101509905054523	5.29233804235153	0.14025164464061	0.93164404353307	0.0137713299088069	0.0143586127522638	0.774885373358355	0.0276186733959743	0.027611654181936	0.931478210391583	0.0136878824426536	0.0140639568195015	5.67576340617648	0.101569230909974	0.974417563985572	0.0509539121996088	0.0522707281202887	-0.0259153567574454	0.0522715072466441	0.0534021008201563	0.204911209562683	0.11012817253656	5.69300974668189	0.244754494624837	0.993710389714713
866	3	B	EMS	EMS	1	1	1	10	A	2	A02	1	3	2	10	19	1	17518	13665	6090	5601	0.312376905026431	55	5.66846046728359	0.0827774273945386	5.30491685767261	0.132881918561339	0.936167908661852	0.0145593518470396	0.0149434669368711	0.591554951015727	0.0607948065678702	0.0607200728538063	0.936184702993775	0.0138916324098077	0.0141220401049908	5.66848525757762	0.0828645831519569	0.992211867915763	0.0535895992423533	0.0547162296898447	-0.00781861797349712	0.0538196253247611	0.0547717968245581	0.241715997265531	0.1111148055568	5.69230013996243	0.268702272964578	1.00568164348952
867	3	B	EMS	EMS	1	1	1	10	A	3	A03	1	3	2	10	19	1	16832	13098	5605	5091	0.138276884951539	55	5.65452210661933	0.0858342281056771	5.2932476117002	0.12891320282029	0.935149179268776	0.0141792256113116	0.0146647421211347	0.734118540273139	0.0355521890630342	0.0355372215860157	0.935262133985745	0.0139513473374875	0.0143317541353356	5.65437812717133	0.0862578455664067	0.988672021935959	0.0530812178605907	0.0552976752734773	-0.0113926283089554	0.0538764623786837	0.0554575832667639	0.234501504569564	0.113108659357396	5.67819300955614	0.261487780268611	1.00204496961428
868	3	B	EMS	EMS	1	1	1	10	A	4	A04	1	3	2	10	19	1	18651	14419	6276	5610	-0.0880247902707878	55	5.67036925678654	0.108580428034486	5.27510509926508	0.138514372627173	0.929400028740797	0.0143390412042025	0.0147284536275026	0.80397999112385	0.0221184956282765	0.0221148896920081	0.929338464177795	0.0145243975960794	0.0145378442216901	5.6701807635666	0.108554585089501	0.966541651230937	0.0530495258615614	0.0530212735896677	-0.0340308863958497	0.054874132761332	0.054664973269448	0.188178387256024	0.113594423201041	5.69399564595141	0.215164662955071	0.979309251322697
869	3	B	EMS	EMS	1	1	1	10	A	5	A05	1	3	2	10	19	1	17066	13272	5954	5219	-0.0366268633886833	55	5.65481355329212	0.0979122263094999	5.28817094711276	0.131270918763056	0.934329468728442	0.0134710124783129	0.0136981973427089	0.787555005219958	0.0259556680561174	0.0259498416617288	0.933967781111022	0.013390368941186	0.0134560439264816	5.65499787955563	0.0980675574628876	0.983748514797487	0.050628332372666	0.0512186333504097	-0.0163849889873826	0.051359117380982	0.0517392233002201	0.22437966080567	0.10583098251422	5.67881276194044	0.251365936504717	0.996986786324039
872	3	B	EMS	EMS	1	1	1	10	A	8	A08	1	3	2	10	19	1	16943	12887	5605	5072	-0.000766456647371516	56	5.67526265425466	0.0915742341512176	5.30859428646458	0.128128783531724	0.934301934475115	0.0138950644107805	0.0139329376323217	0.811676964008373	0.0216069242847839	0.0216035627627196	0.934348686052318	0.0139004801908388	0.0137847756705872	5.6753260697546	0.0916150511218909	0.985192244350259	0.0526357140973158	0.0525207588761513	-0.0149184852114887	0.0534761684400468	0.0530305232179756	0.227358339889729	0.108198741814841	5.69914095213941	0.254344615588775	0.998470007226146
873	3	B	EMS	EMS	1	1	1	10	A	9	A09	1	3	2	10	19	1	17794	13273	5910	5227	0.0773821753549209	56	5.669247127457	0.0885914301607605	5.30517503589375	0.125134559633699	0.935927814486829	0.0139214189186512	0.0145955634148809	0.740178465213506	0.034528279482699	0.03451456772742	0.935833245462823	0.0141179519687777	0.0142833047670939	5.66937076123966	0.0887286080865297	0.990860332740027	0.0538186121253133	0.0547707853596666	-0.00918169026561861	0.0544389389559678	0.0550956652267334	0.238967598210366	0.111531707091583	5.69318564362447	0.265953873909413	1.00429313882205
874	3	B	EMS	EMS	1	1	1	10	A	10	A10	1	3	2	10	19	1	17162	13220	5615	5043	0.136449394868968	55	5.65999696943171	0.0855388509733523	5.28279425601639	0.123915027872024	0.93312181466565	0.0136163809614215	0.0139740404018926	0.696390516556361	0.0418253400819503	0.0418009764698813	0.933041913554861	0.0136017118322946	0.0135319657988812	5.6600602231192	0.085998079197153	0.980257114045261	0.0514023630441534	0.0510074564404146	-0.0199403804575449	0.0521522756550215	0.0517743517360809	0.217139373452403	0.106160492856526	5.68387510550401	0.24412564915145	0.993399882832739
876	3	B	EMS	EMS	1	1	1	10	A	12	A12	1	3	2	10	19	1	17936	13890	5830	5203	-0.0195253424796875	55	5.6684921474111	0.0906472240169733	5.29049538713634	0.125686206196942	0.932348388210451	0.0134972981366005	0.0137668558682166	0.798994971748497	0.0235253772950641	0.02352103874757	0.932188157337429	0.0134863866966382	0.0135976571396749	5.6686957827829	0.0906050534378956	0.977059967027079	0.050104959743566	0.0509782926447909	-0.023207250084898	0.0512425661796694	0.0518811448017874	0.210462997006636	0.10681052709674	5.69251066516771	0.237449272705683	0.990115282004717
877	3	B	EMS	PETITE	1	1	1	10	B	1	B01	1	3	2	10	19	2	6833	6161	3482	3304	-0.331627217047219	51	5.4800191662333	0.147052998635687	5.14593721426511	0.167493640005651	0.939315636531798	0.0163048989290233	0.0162589712359271	0.844736000973457	0.017258997220506	0.0172572838637084	0.939144489009414	0.0161453553721906	0.016084874923741	5.47981319730864	0.146746141288996	1.00374234216985	0.0632164031469963	0.0628111513837035	0.0037353569912598	0.0632150961695522	0.0625797377440807	0.26486153385336	0.124635150456046	5.50609605506352	0.289298728271603	1.01620942462282
878	3	B	EMS	EMS	1	1	1	10	B	2	B02	1	3	2	10	19	2	16907	13287	5399	4967	0.39419224954676	56	5.65987533455269	0.081257230186245	5.28667648049988	0.12116653019582	0.933742113232848	0.0141571486095512	0.0143645085108071	0.694841535509345	0.0422095123306076	0.0421844716668472	0.933789672624178	0.0140119075596758	0.0139973313725837	5.65984233342823	0.081345276611842	0.9830749113527	0.0530034344827565	0.0533460041690692	-0.0170699548690858	0.0538747239242654	0.0538393980731783	0.222986851849108	0.110380314136891	5.68612519118311	0.247424046267351	0.995030718152623
879	3	B	EMS	EMS	1	1	1	10	B	3	B03	1	3	2	10	19	2	17142	13699	5625	5190	0.318268064241037	56	5.6576375515695	0.0824407706167961	5.29813556962459	0.124501408345122	0.93628729041146	0.0140091860971544	0.0145968268453707	0.702552577194908	0.0413131295679609	0.0412896495405831	0.936390547552662	0.0137772175557778	0.0142335963671337	5.65782697576386	0.0825749895154697	0.993005173368508	0.0531725122448032	0.0551094520182381	-0.00701940537588111	0.0534528915651104	0.0551794135929449	0.243325703462142	0.111733337838659	5.68410983351874	0.267762897880385	1.00520663727221
882	3	B	EMS	EMS	1	1	1	10	B	6	B06	1	3	2	10	19	2	16045	13348	6955	6421	0.422917631471254	55	5.64792647612539	0.0934987137466386	5.30366035299625	0.130087312072242	0.938319399731405	0.012311291284682	0.0128977579048536	0.680391949869551	0.0456676358929513	0.0456359284395914	0.937863904687582	0.0119334456205351	0.0121677016105462	5.64779040266803	0.0937042864393231	0.998720782814045	0.0466000648264002	0.0475814859440367	-0.00128003608269847	0.0466474798294962	0.0474530625121346	0.254847360068299	0.0953654119033518	5.67407326042291	0.279284554486542	1.01106364077769
884	3	B	EMS	EMS	1	1	1	10	B	8	B08	1	3	2	10	19	2	16581	13278	6663	6139	0.510445797883452	56	5.65785292184787	0.0857530250782413	5.28775919385159	0.125106103259347	0.934648222809239	0.0133658786334663	0.0135476984457257	0.724084426216166	0.0372162018881718	0.037199034106226	0.934417767361205	0.012851986807766	0.0131519253081049	5.65772488983768	0.085805095671826	0.985454540935806	0.0487922885863956	0.0501882318203246	-0.0146522813723076	0.0494493488061122	0.050636881835048	0.227898554771297	0.103337630956793	5.68400774759256	0.25233574918954	0.997469215559208
886	3	B	EMS	EMS	1	1	1	10	B	10	B10	1	3	2	10	19	2	16595	12773	5474	4931	0.231170931085699	55	5.65420831836044	0.0832678938127629	5.27707489834178	0.116567961340778	0.933566715454315	0.0131397573824921	0.0131766995553632	0.744849215124572	0.0333764675271934	0.0333640821365149	0.933333165617491	0.0129082973674394	0.0129169765000961	5.65401110473577	0.0832300608720656	0.981352687130599	0.048460277096796	0.0486235692039957	-0.0188233660558065	0.049390290842863	0.0494059421032284	0.219416965546044	0.100968742641453	5.68029396249065	0.243854159964287	0.993265889151939
887	3	B	EMS	EMS	1	1	1	10	B	11	B11	1	3	2	10	19	2	17168	13913	5596	5208	0.545313490512167	55	5.66245844276423	0.070002549024086	5.28839344460541	0.108682174872324	0.933815141425444	0.0125603791017111	0.0127548241142194	0.616440685016473	0.0560488804671986	0.0559902987578222	0.933708447273897	0.0119284296378638	0.0122085945321989	5.66254751027707	0.0699430041794414	0.982768030140871	0.0452024901120587	0.0462200181454472	-0.0173821684323992	0.0458290920745769	0.046842946742813	0.222351670185739	0.095696421660775	5.68883036803195	0.246788864603982	0.994716245242853
888	3	B	EMS	EMS	1	1	1	10	B	12	B12	1	3	2	10	19	2	16759	13192	5945	5384	0.11458211655483	55	5.66153016031445	0.0867627111712164	5.30162456409481	0.118546597946697	0.93583601191664	0.0127013209401122	0.0132056274964645	0.800473987878866	0.0239090882155181	0.0239045339445495	0.935778600933167	0.0126101448890558	0.0130390875087253	5.66155222480683	0.0868705373247836	0.990650529864712	0.0481624899901641	0.0501547766767887	-0.00939345078207875	0.0488052256260459	0.0504134770554203	0.238540277831125	0.10217561608435	5.68783508256171	0.262977472249368	1.0027937440563
889	3	B	SHAM	SHAM	1	1	1	10	C	1	C01	1	3	2	10	19	3	18213	13950	5816	5300	0.199516538581742	56	5.66611298017773	0.0785419407555943	5.30205913891701	0.124301391239016	0.935452438037126	0.0143570041277763	0.0145033021699685	0.681774984530358	0.0447709839874762	0.0447411063133284	0.935537758665954	0.014238574633939	0.0140491708799233	5.66610373999814	0.0789151247282083	0.989726904662828	0.0542869353999642	0.0542462621533199	-0.0103262277866688	0.0548420373311431	0.05440097783464	0.236656890491396	0.110719145973735	5.69136389873254	0.259990810820175	1.0012936600382
891	3	B	EMS	EMS	1	1	1	10	C	3	C03	1	3	2	10	19	3	17832	14457	5727	5424	0.415107610151151	55	5.65232516457212	0.0739109420675674	5.30801559372908	0.120986158140544	0.938119159853373	0.0146661814420187	0.0149455995583031	0.640878997203681	0.0525872369326426	0.0525388419850832	0.938035448505699	0.0142652138844268	0.0144937174916376	5.65235349070965	0.0740663395483293	0.99939054499532	0.0555464738901393	0.0577360737906591	-0.000609640929449978	0.0557129337196869	0.0569759068669404	0.256188833820174	0.115562662962667	5.67761364944405	0.279522754148954	1.01118544235644
893	3	B	EMS	EMS	1	1	1	10	C	5	C05	1	3	2	10	19	3	16447	12819	5586	5035	0.115015658291624	55	5.65755013149224	0.0870943137517586	5.31299142425866	0.117111674114201	0.938297254976173	0.0128296342640785	0.0133057250778184	0.818225635987795	0.0212232532099027	0.0212200675657455	0.938058865929478	0.0130265189523201	0.0131786024469138	5.65735140397055	0.0871638947127686	0.999482043558732	0.0508708748213638	0.0516331538130017	-0.000518090627042736	0.0509204227500267	0.0514207937305165	0.256371957625132	0.103328331581509	5.68261156270495	0.279705877953911	1.01127910104412
894	3	B	EMS	EMS	1	1	1	10	C	6	C06	1	3	2	10	19	3	15611	12990	6424	5891	0.477295874059466	55	5.62481818556473	0.0861069695326779	5.24520164109971	0.120113413000494	0.932886642741881	0.0123191643046087	0.0126533106388747	0.719231992541837	0.0379842766737522	0.0379660245001707	0.932706692038677	0.0119967940929394	0.0122744787123828	5.62480088816523	0.0862828497312127	0.978999230455268	0.0447895420719318	0.0462496810966163	-0.0212244225037558	0.0458803414442859	0.0469791199164022	0.214517940086451	0.0965109243788643	5.65006104689963	0.23785186041523	0.990312723828743
896	3	B	EMS	EMS	1	1	1	10	C	8	C08	1	3	2	10	19	3	16650	13607	6907	6361	0.548689161860898	55	5.64419133561691	0.0879191274387761	5.3004302553629	0.127380665701233	0.939300748475708	0.0135311630014059	0.0139023336933792	0.776194841375772	0.0288980116727579	0.0288899715051791	0.93918095751933	0.0132530118260851	0.0136645903734673	5.64409972643799	0.0880281054243022	1.00388608389971	0.0522890433898602	0.0535176958569364	0.00387855258092013	0.0520982118693289	0.0532933116102805	0.265146717571263	0.106164016596466	5.66935988517239	0.288480637900043	1.01578711322947
897	3	B	EMS	EMS	1	1	1	10	C	9	C09	1	3	2	10	19	3	16640	12103	5807	4925	-0.0297618620994697	55	5.63863299961324	0.0971673820346894	5.27819093955892	0.129920425206273	0.935793568808932	0.0131376375418988	0.0135338084236623	0.78150468751983	0.0273628167145628	0.0273559907172991	0.935567457377056	0.0129523854797908	0.0132786726525856	5.63863715610956	0.0971332930974254	0.98984070460527	0.0499914583609543	0.0507515852056849	-0.0102112532391312	0.050385910036001	0.0511674085091896	0.236889134500066	0.103562293146906	5.66389731484396	0.260223054828846	1.00141014660224
898	3	B	EMS	EMS	1	1	1	10	C	10	C10	1	3	2	10	19	3	16875	12780	5731	4896	-0.0365465259972804	56	5.66190823858588	0.0928158355063466	5.30126011056905	0.12224082201592	0.935155137728142	0.0126374301584548	0.0129095897104239	0.829472222214909	0.0186656001934126	0.0186634329192703	0.934958069456659	0.0127086998981349	0.0127873899466852	5.66190011533545	0.0928857406963886	0.987510927677005	0.0483336687358739	0.0486906615650291	-0.0125677162807339	0.04916366205349	0.0491961120129287	0.232123719006004	0.0998314353991812	5.68716027406985	0.255457639334783	0.9990253676337
899	3	B	EMS	EMS	1	1	1	10	C	11	C11	1	3	2	10	19	3	17281	14001	6590	6021	0.549980789336177	56	5.65793025714173	0.0848535223469021	5.28568330363631	0.125225966699102	0.933905296242541	0.0131288622868836	0.0129607568532228	0.734201831302862	0.0352962047716306	0.0352815581213644	0.933880584765542	0.0127185031947491	0.0125952214985859	5.65808115673549	0.0848940777660219	0.983418622390724	0.0478019231106372	0.0480124944196521	-0.0167203874429778	0.0487014752327327	0.0484879923350916	0.223697785095448	0.0992739372299405	5.68334131546989	0.247031705424228	0.994836450033406
901	3	B	EMS	EMS	1	1	1	10	D	1	D01	1	3	2	10	19	4	18267	13993	6251	5480	-0.028635322629365	56	5.66133744558656	0.0972044533056684	5.31172102150749	0.130273566318565	0.936982552591917	0.0145427456037855	0.0145948062843373	0.842169176625403	0.0167475224499165	0.016745956934414	0.936686672667475	0.014492555667953	0.0145012884297795	5.66133593982914	0.0973010920499561	0.99414865260955	0.0558234013970617	0.0564259506055701	-0.00586853365212005	0.0560923642452991	0.0563559000984991	0.245641401993827	0.114137897788445	5.68927564997387	0.266097924296968	1.00436581905674
902	3	B	EMS	EMS	1	1	1	10	D	2	D02	1	3	2	10	19	4	18099	14886	6420	5868	0.155144739519443	54	5.61550764438286	0.0841773908102945	5.28980515381859	0.117748852919541	0.94174336166769	0.0129661782151281	0.0129276555409487	0.764377919240795	0.031584934730578	0.0315744378839746	0.941413817118888	0.0128432509413737	0.012675485010078	5.61544874569526	0.0842075452936352	1.01276552337542	0.0512469472106261	0.0511379275166051	0.012684730780816	0.0506626917587761	0.0502005344037802	0.282607687600328	0.0996873048196745	5.64338845583999	0.303064209903469	1.02336744824692
903	3	B	EMS	EMS	1	1	1	10	D	3	D03	1	3	2	10	19	4	16330	13279	6394	5889	0.4197044925325	55	5.65497506324196	0.0900605211107152	5.33549200099582	0.124138018465064	0.942725696004928	0.0130224496711627	0.0132305321713229	0.782202073855047	0.0283862652539892	0.0283786445758798	0.942423004095555	0.0130078074895692	0.012968159046529	5.6547699935238	0.0901050063104496	1.01682992513805	0.0526845479634112	0.052423477650277	0.0166898711622895	0.0516153147095487	0.0514067060734937	0.29049953252664	0.101390011918416	5.68270970366853	0.310956054829781	1.02751584977716
904	3	B	EMS	EMS	1	1	1	10	D	4	D04	1	3	2	10	19	4	15854	11952	5393	4452	-0.048222831158609	56	5.672036405533	0.0933624697009686	5.31982720138155	0.123187262464908	0.936784724120709	0.012678552923515	0.0132729597883886	0.796818540342891	0.0246765312791862	0.0246715243384962	0.936567766763348	0.0126549661346071	0.0130586840435259	5.67199957237738	0.0935010414405048	0.993689183668652	0.0490881064246425	0.0505132611248225	-0.00633081445995979	0.0492084946732064	0.0506296309722678	0.244711560245662	0.102272816817705	5.69993928252211	0.265168082548803	1.00389685418348
907	3	B	EMS	EMS	1	1	1	10	D	7	D07	1	3	2	10	19	4	17271	14104	7108	6656	0.494345202187554	55	5.65143599864373	0.0884308880570257	5.30197247653801	0.129790755012699	0.937834335693877	0.0133920993720818	0.0133878068710671	0.731126434344732	0.036576173099855	0.0365598754446112	0.937584981441581	0.0131679427414363	0.0129797442557012	5.6513448955269	0.0888399764761305	0.997633695253595	0.0511687720084842	0.0506929104723689	-0.00236910972378971	0.0512319113200257	0.0505761625850702	0.252666182790061	0.101823351558159	5.67928460567163	0.273122705093202	1.00792288774282
908	3	B	EMS	EMS	1	1	1	10	D	8	D08	1	3	2	10	19	4	16844	13247	5733	5277	0.301218607588619	56	5.65555331449377	0.0829067594548285	5.30288264734666	0.114792231834318	0.937277386996504	0.0129017600969727	0.0130762642597117	0.752133741470143	0.0327366104129696	0.0327249234748857	0.937327704654855	0.012828640992487	0.0128272444905514	5.65565572188864	0.0828733116086032	0.996633070341224	0.0498205631321575	0.0496735729990927	-0.00337261052140027	0.0499266361914227	0.0497788977430903	0.250654274037861	0.0999768207421693	5.68359543203337	0.271110796341002	1.00690158272425
909	3	B	EMS	EMS	1	1	1	10	D	9	D09	1	3	2	10	19	4	16736	13602	5824	5476	0.46530113170525	55	5.64250260463711	0.0794471662152407	5.29015263419457	0.109319033780454	0.937636283203802	0.0123764583611416	0.0124295660304986	0.815719156648712	0.0216069242847839	0.0216035627627145	0.937544918245778	0.0122201214373534	0.012323682376192	5.64248380224036	0.0793162070652	0.997477743938671	0.04769311276955	0.0480399451563607	-0.0025254423163679	0.0477083626034814	0.0479902324734825	0.252352885071491	0.096524759427295	5.67042351238509	0.272809407374632	1.00776371335228
911	3	B	SHAM	SHAM	1	1	1	10	D	11	D11	1	3	2	10	19	4	17392	14108	5800	5352	0.311863284273736	55	5.65097011740525	0.0793163838073025	5.2970105144532	0.109368810926285	0.937072352949615	0.0124387137512883	0.0126039734558969	0.773770552534433	0.0288980116727579	0.0288899715051753	0.937116485353309	0.012271879753711	0.0124207135176207	5.6509833490833	0.079285199051329	0.995813081547255	0.0476676271967423	0.0481280298138973	-0.00419570821335637	0.0477193973121626	0.0482176792297243	0.249002538701018	0.0970262721165461	5.67892305922803	0.269459061004159	1.00606464706524
912	3	B	EMS	EMS	1	1	1	10	D	12	D12	1	3	2	10	19	4	17569	13033	5927	5286	-0.138582776768027	56	5.67478446642989	0.102049868151556	5.32102022904195	0.136403654826245	0.936782030231088	0.0144557616319606	0.0148231041663115	0.776422092533185	0.0282583309809454	0.0282508128435594	0.936369743345711	0.0144092683257944	0.014533133729416	5.67453248200539	0.102006051004511	0.992924937543677	0.0554809420149825	0.0561792465727665	-0.0071002094485772	0.0558101994572623	0.0562881256745962	0.243163013660803	0.113920857662126	5.70247219215012	0.263619535963944	1.00311681323785
913	3	B	EMS	EMS	1	1	1	10	E	1	E01	2	3	2	10	20	1	18189	14230	6215	5581	0.221006264463803	55	5.65898769966725	0.0845784451616543	5.30227896611646	0.127261122371286	0.936438972723727	0.0144050794794012	0.0148792931247392	0.716415151059408	0.0388804205524704	0.0388608466264336	0.936302994680371	0.0142714871751456	0.0145094654457423	5.65879594075611	0.0847424831170184	0.99266759651111	0.0548433738198656	0.0563382120499624	-0.00735941769305462	0.0553550672763851	0.0563174697887497	0.242641038646195	0.114302857168985	5.68686008432405	0.256666722311547	0.999629359144734
914	3	B	EMS	EMS	1	1	1	10	E	2	E02	2	3	2	10	20	1	17091	13726	5000	4659	0.184643440682917	56	5.66392319712913	0.0741300277258137	5.32852842064841	0.1125900544779	0.940077728666759	0.0137301669943037	0.013739266296045	0.74813658756988	0.0338883728497886	0.0338754090658135	0.939996668026712	0.0136060754968958	0.0135378024457626	5.66405193936746	0.0743364173912757	1.00711196939114	0.0537580591995455	0.0540321991894394	0.00708679860891912	0.0533945928072574	0.0533128792730325	0.271525576438523	0.106503106421695	5.6921160829354	0.285551260103874	1.01427775164228
916	3	B	SHAM	SHAM	1	1	1	10	E	4	E04	2	3	2	10	20	1	16599	12818	5757	5010	0.0928066175686042	55	5.65197107160073	0.0854208038967311	5.29104900613589	0.12147374678878	0.935936557308844	0.01270644137183	0.0130493703931418	0.736443429002291	0.0352962047716307	0.0352815581213644	0.935630708932686	0.0125434809982566	0.0127083876396077	5.65190849735869	0.0853533717935067	0.990083160942279	0.0482098669782606	0.0489066276957739	-0.00996633843704731	0.0484566330504907	0.0491580878896168	0.237383761904835	0.0997481730574845	5.67997264092663	0.251409445570186	0.997008419702689
917	3	B	EMS	EMS	1	1	1	10	E	5	E05	2	3	2	10	20	1	15706	12942	6455	5739	0.354177951362043	55	5.65123244946369	0.0886157103757809	5.30449483622912	0.12346152989128	0.937970471510457	0.0127941668686449	0.0130251848966581	0.784782719134814	0.0271069636128984	0.0271003272526461	0.937471573790422	0.0126547917195785	0.0127811721742625	5.65120184469615	0.0887111124102837	0.997192370541211	0.0492073791252028	0.0499544325874319	-0.00281157824325855	0.049370860948089	0.0498236820687864	0.251779331154117	0.100429048167478	5.67926598826409	0.265805014819468	1.00421804336842
918	3	B	EMS	EMS	1	1	1	10	E	6	E06	2	3	2	10	20	1	16793	12590	5708	4777	-0.0233305794197061	55	5.65510288270175	0.0890448528214514	5.30248028644464	0.125960768050296	0.937234277381162	0.0137585530249281	0.0141187204982568	0.763683439523714	0.030689244998233	0.0306796157577099	0.937104822435108	0.0135710348308662	0.0138486088310957	5.65523297615121	0.0890824060875218	0.995767843429181	0.052774933472494	0.0536262711469319	-0.00424113749350987	0.0529214566073436	0.0537009418914046	0.248911334341827	0.108120606001881	5.68329711971915	0.262937018007178	1.00277339551602
919	3	B	EMS	EMS	1	1	1	10	E	7	E07	2	3	2	10	20	1	16971	13622	5960	5449	0.311491961050781	55	5.64776916393979	0.0827977378722863	5.27879931375556	0.116283420380594	0.93452212420385	0.0128528359741835	0.0128362100156414	0.749633305381569	0.0327366104129698	0.0327249234748891	0.93459643359901	0.0127057952207217	0.0125743841394221	5.64783528572982	0.0829431097260847	0.986133582331859	0.0483769095599442	0.0479307302868686	-0.0139634545175608	0.0489954404936198	0.0484106688818035	0.229295725342209	0.0985516428363323	5.67589942929776	0.243321409007561	0.993003055249287
921	3	B	EMS	EMS	1	1	1	10	E	9	E09	2	3	2	10	20	1	16240	11587	5003	4251	-0.100759872547172	56	5.66233277043975	0.09182154115671	5.29404716134372	0.124152558932074	0.933997951305086	0.0132257381694407	0.0137443166145303	0.768918921532979	0.0291538905367595	0.0291456349698247	0.933888262152241	0.0131398275360267	0.013476060941106	5.66220240185558	0.0919448977434205	0.983447659435414	0.0496799964499875	0.0510001230700898	-0.0166908612418728	0.0506914455400279	0.0516624641359588	0.223757822284837	0.105445032994607	5.69026654542352	0.237783505950189	0.990279195021358
922	3	B	EMS	EMS	1	1	1	10	E	10	E10	2	3	2	10	20	1	16734	11901	4794	4188	0.0391513942565438	55	5.6664922389377	0.0776894640032052	5.30308152608524	0.120196004086777	0.935605027126074	0.0131036967125078	0.013379532807763	0.671748436433907	0.0465643610837507	0.0465307505658649	0.935023674100269	0.0128946906540209	0.0128809663177508	5.66645913703893	0.0777994917702853	0.98776121168399	0.0493344434902106	0.0494170585192772	-0.0123142995623151	0.049803950701891	0.0497387983447097	0.232636749679102	0.101268814238039	5.69452328060687	0.246662433344454	0.994653674060403
923	3	B	EMS	EMS	1	1	1	10	E	11	E11	2	3	2	10	20	1	22363	18782	9984	9623	0.756171719208689	53	5.61323380685855	0.0807733072889194	5.24164856764389	0.136406032835404	0.933674713421294	0.0134741962963451	0.0135163800820553	0.422087624401404	0.0911394583982597	0.0908883616822227	0.933633224022197	0.0115668511630391	0.0116968274042436	5.61326277962543	0.0812307812839475	0.982483998746175	0.0435387900713608	0.0450969440040909	-0.0176712216347781	0.044436289647367	0.0453049526630795	0.221763423263866	0.0934260897559374	5.64132692319337	0.235789106929217	0.989301923101859
926	3	B	EMS	EMS	1	1	1	10	F	2	F02	2	3	2	10	20	2	16794	13277	6267	5696	0.471807300341348	56	5.67282768932892	0.0821893347265838	5.33508763933137	0.12972351145628	0.939908309100311	0.0135635465112865	0.0137290877161763	0.732417981569767	0.0365761730998548	0.0365598754446112	0.939531377795894	0.01316602680661	0.0133414831846301	5.67289014385537	0.0823641906752338	1.00526936814568	0.0519375918003245	0.0529430126904174	0.00525553357452834	0.0516936855786795	0.0523848357891827	0.267887005408662	0.104736605206975	5.69877801505791	0.278693586020006	1.01076157881663
927	3	B	EMS	EMS	1	1	1	10	F	3	F03	2	3	2	10	20	2	18431	14462	6344	5919	0.31396295443296	55	5.64947116294234	0.0827311617441	5.32451703444996	0.116824638536512	0.942106020988817	0.0131135120655028	0.0132418288380489	0.774510731748644	0.029665659741661	0.0296569618991188	0.941880820741666	0.0130480015809921	0.0130256921578088	5.64943626061342	0.0828561706951812	1.01464234778776	0.0523318849070826	0.052541468041007	0.0145361836864512	0.0515927671448607	0.0515700232830035	0.286259656904914	0.102049975344696	5.67532413181597	0.297066237516258	1.02023639759412
928	3	B	EMS	EMS	1	1	1	10	F	4	F04	2	3	2	10	20	2	14636	11817	5012	4241	0.0378095032444401	54	5.60451548627206	0.0959766471579677	5.19427284586984	0.127723677013975	0.926494498908689	0.0134172883974866	0.0135794748942684	0.738001091456067	0.033632417987661	0.033619745601159	0.926171162536837	0.0132090225970673	0.0132397257886377	5.6047393921868	0.0956445288463102	0.955122804553068	0.0463855905942	0.0474656146177551	-0.0459153556134952	0.0488395068800505	0.0493786397767585	0.16341007775321	0.104241992549846	5.63062726338934	0.174216658364554	0.960070163653369
929	3	B	EMS	EMS	1	1	1	10	F	5	F05	2	3	2	10	20	2	16824	13607	6049	5597	0.444304873082532	56	5.66066250695863	0.0849319109055724	5.3193663496873	0.121012177951046	0.939311568082702	0.0124778276965141	0.0127416326277961	0.74313415279706	0.0346562641818837	0.0346423994597499	0.939148482155608	0.0122247092172436	0.0124303349375971	5.66073268645263	0.0850815590818703	1.00375807920987	0.0482229666514417	0.0490354250093128	0.00375103527246835	0.0480656414972143	0.048688839950595	0.264892760119464	0.0972971614365037	5.68662055765517	0.275699340730808	1.00923386945056
931	3	B	EMS	EMS	1	1	1	10	F	7	F07	2	3	2	10	20	2	16740	13422	5435	4997	0.306951145568623	55	5.65854272430951	0.0771033752713516	5.30765218470219	0.115068434285573	0.937985944968358	0.01335305180208	0.0134977477646771	0.794733771945477	0.0253160893188026	0.0253106830001126	0.938057116222496	0.013440049540417	0.0133664355188275	5.65840318564844	0.0770497342474781	0.999475206354913	0.0523062267186773	0.0523352961066888	-0.000524931397468627	0.0525439119078734	0.0521421188155999	0.256358274910744	0.104734892660094	5.68429105685098	0.267164855522088	1.00490446239994
932	3	B	SHAM	SHAM	1	1	1	10	F	8	F08	2	3	2	10	20	2	16726	13375	5754	5275	0.390279893240336	55	5.65756637481895	0.0825690838545329	5.30610320872759	0.115343063118903	0.937266560774674	0.0131928994943936	0.0133358870315616	0.748436980382588	0.0333764675271934	0.0333640821365116	0.937129552871343	0.0131831278377675	0.0130676315728738	5.65759850273345	0.0827000911663744	0.995863772411642	0.0509610177095746	0.0508255193384876	-0.00414480543915571	0.0512278830982879	0.0508108627207049	0.249104726435024	0.102453950118733	5.68348637393599	0.259911307046368	1.0012537895674
933	3	B	EMS	EMS	1	1	1	10	F	9	F09	2	3	2	10	20	2	17675	12654	5609	4758	-0.0171460553824829	56	5.66494972568332	0.0774997524862158	5.30656548003812	0.116656772610539	0.936149662839365	0.0128247434275759	0.0133555951192522	0.697034897540856	0.0422095123306087	0.0421844716668525	0.935926118996513	0.0129031788224992	0.0129508643586612	5.66506339381881	0.0776167859103077	0.991217118849581	0.049505227263437	0.049922016866624	-0.00882167826898064	0.0498954833478763	0.0501291664413674	0.239693870712857	0.101584181975305	5.69095126502136	0.250500451324201	0.996556649265864
934	3	B	EMS	EMS	1	1	1	10	F	10	F10	2	3	2	10	20	2	16718	11684	5456	4210	-0.279647334001486	55	5.67139502611396	0.096871554179093	5.32730988130454	0.139961399615066	0.938321284051926	0.0138192227133045	0.0150603075924115	0.707649219300378	0.0406728968251053	0.04065049087897	0.937951099201821	0.0138700794799374	0.0144896049445928	5.6713631372011	0.0966505370739508	0.999061105983354	0.0539245236516692	0.0565593813998354	-0.000939335145080744	0.0538960983688933	0.0563700202501549	0.25552922182405	0.113282131042776	5.69725100840364	0.266335802435394	1.00448586275223
936	3	B	EMS	EMS	1	1	1	10	F	12	F12	2	3	2	10	20	2	17573	13348	5553	4958	0.0635068624265482	55	5.66648615550529	0.0839181414850242	5.31892897245736	0.126154590966862	0.938054934725346	0.013911245147463	0.0140460899315072	0.763429711009408	0.0308171976289539	0.0308074474900292	0.937992722198869	0.0138739226119515	0.0137942774250575	5.66657652681188	0.0840110928131297	0.999223643604964	0.0536668341909503	0.0543558877982445	-0.000776657949703432	0.0540480376949297	0.0539689350826133	0.25585471356886	0.10883334906338	5.69246439801443	0.266661294180204	1.00465016637478
938	3	B	EMS	EMS	1	1	1	10	G	2	G02	2	3	2	10	20	3	16502	13163	5452	5028	0.447304673276887	56	5.66854571876685	0.0780290420451476	5.33154774700343	0.116961655676843	0.940115259127527	0.0135139039609241	0.0134336373295757	0.74003710868058	0.0352962047716309	0.0352815581213644	0.939853151751793	0.0132824283668056	0.0131766095061445	5.66859271583598	0.0781216522991934	1.00654291369528	0.0528859357303371	0.0522415907665764	0.00652160174410058	0.0524272956620666	0.0517304513652692	0.270403278702964	0.103089262198942	5.69450232825245	0.279208023962026	1.01102451363609
939	3	B	EMS	EMS	1	1	1	10	G	3	G03	2	3	2	10	20	3	12671	11263	5275	4976	-0.131189113467812	52	5.53241099989131	0.12670427015591	5.15880711109327	0.145410650417352	0.932634438303399	0.0118497046305253	0.0119446137735986	0.827953731530757	0.0189213539584637	0.018919096383924	0.932196236759601	0.0117311641611319	0.0117300162376352	5.5324921897607	0.126615705070025	0.977090122957254	0.0434674718967898	0.0440453186890245	-0.0231763866298156	0.0446342629594035	0.044838957902299	0.210526178193739	0.0922786196736251	5.55840180217717	0.219330923452801	0.981311253578146
941	NULL	B	NULL	NULL	1	1	1	10	G	5	G05	2	3	2	10	20	3	16404	13117	5349	5170	0.38416590242722	55	5.66064305770727	0.0805105456613844	2.89652621748956	0.191804482996574	0.510989513524956	0.0324924197009225	0.0347320539003778	0.319883968698914	0.0337603948664174	0.033747577333482	0.5106587790668	0.0320615863093022	0.0346549513670419	5.66035155875701	0.0806402300216413	0.517449864289237	0.00445208370244595	0.00463026461695342	-0.658842639136944	0.00859154813580917	0.00893345212402535	-3.08589813558012	0.262075265139446	5.68626117117348	-3.07709339032106	0.517606110646842
942	3	B	EMS	EMS	1	1	1	10	G	6	G06	2	3	2	10	20	3	17074	13696	5939	5460	0.344259924124621	55	5.65677595805793	0.0832086873489398	5.31172418900099	0.121160564473172	0.938957518858735	0.0132132063720066	0.0137329221651327	0.705258400766557	0.0413131295679617	0.0412896495405858	0.93900947288357	0.0126689654402444	0.0133214157640759	5.65674186835249	0.0834311618993594	1.00321052841123	0.0501834984699263	0.0525309554171446	0.00320538564807213	0.0498810177433485	0.052139620559798	0.263805707236115	0.104346437694358	5.68265148076896	0.272610452495177	1.00766265799942
943	3	B	EMS	EMS	1	1	1	10	G	7	G07	2	3	2	10	20	3	17444	13950	6037	5570	0.390719552498484	56	5.670765210921	0.0835617196482123	5.32329645371617	0.120851655258715	0.938097163146077	0.014055602323777	0.0138762651904014	0.758260784242628	0.0317128945062145	0.0317022696162983	0.937899192587034	0.0139083208709981	0.0136276675070023	5.67083320772246	0.0837781533731339	0.998858485380141	0.054017008434594	0.0532773351970918	-0.00114216700141489	0.0543994838381334	0.053111989434489	0.255123312990813	0.106751881390161	5.69674282013893	0.263928058249875	1.003272127149
944	3	B	EMS	EMS	1	1	1	10	G	8	G08	2	3	2	10	20	3	18006	13653	8072	7142	-0.785649448059516	55	5.65232661401947	0.201067522800157	5.35670928302492	0.30957171108349	0.945125564000192	0.0241437723415225	0.0227829649073711	0.515832775342905	0.0759497491869122	0.0758042172680138	0.944053935130339	0.0171979737725819	0.0179271571752221	5.65251798528705	0.201886905576042	1.02346652494991	0.0700147608236475	0.0751093933525942	0.023195418918544	0.0684003021379223	0.0720585188548908	0.303253419445885	0.143424933772326	5.67842759770352	0.312058164704947	1.02809779089531
946	3	B	EMS	EMS	1	1	1	10	G	10	G10	2	3	2	10	20	3	18538	14813	6650	5950	0.194293633189953	55	5.63862102232024	0.0843004191204476	5.29493772781838	0.131028973549093	0.938399626990965	0.0140170224672896	0.0143420574287539	0.647662122316837	0.0515618097976892	0.051516188126491	0.938290061588157	0.0137459506736951	0.0137044122791677	5.63866105501485	0.0846948302888252	1.00038629352561	0.0537473844133437	0.0541355229780655	0.00038621893020626	0.0536684038756403	0.0536756003366983	0.258179908454189	0.108140386518126	5.66457066743132	0.266984653713251	1.00481344665074
947	3	B	EMS	EMS	1	1	1	10	G	11	G11	2	3	2	10	20	3	16481	12974	5138	4770	0.515843989102844	56	5.67707470490072	0.0704023226644682	5.34882648142624	0.114591161546527	0.941321174544085	0.014104488735462	0.0138864469571696	0.646417966084073	0.0519463321850315	0.0518996833234645	0.941218421075275	0.0136032111830513	0.0134684962784244	5.67721963146929	0.0705879558447366	1.01198228439465	0.054417879912357	0.0545832130190417	0.0119110650992972	0.0536697856541557	0.0534444546879994	0.281079689609927	0.10656618753359	5.70312924388576	0.289884434868989	1.01651198806863
948	3	B	SHAM	SHAM	1	1	1	10	G	12	G12	2	3	2	10	20	3	17469	13291	5968	5170	-0.197069855570604	56	5.68078951663909	0.106416137060318	5.33573964931638	0.140728134257362	0.937903216477673	0.0145467820542098	0.01492213145244	0.826056252247195	0.019688630234033	0.0196860867778536	0.937770359525473	0.0145922736169955	0.0147625861353213	5.6808708227019	0.106337194276306	0.99835593097311	0.0570072072258512	0.0575195064706576	-0.00164542199149488	0.0571268785527975	0.0573960021263281	0.25411583659106	0.115368098834291	5.70678043511837	0.262920581850121	1.00276512834124
949	3	B	EMS	EMS	1	1	1	10	H	1	H01	2	3	2	10	20	4	18286	13606	6096	5210	-0.0521762455643118	56	5.66359350585342	0.0946455968509473	5.32155597196791	0.135085295518031	0.939159966209711	0.0139684367471806	0.0144597676046258	0.760275734986805	0.031584934730578	0.0315744378839782	0.938846248983068	0.013915025496627	0.0141520903183955	5.66352798876337	0.0947143974521432	1.00256835660408	0.0546408167050412	0.0554617852712585	0.00256506400172561	0.0545083550191436	0.0552065706687896	0.262529295753845	0.110308889126597	5.68580588877895	0.269637468862539	1.0061549798948
951	3	B	EMS	EMS	1	1	1	10	H	3	H03	2	3	2	10	20	4	17320	13488	5710	5215	0.141630889675294	56	5.66716799960585	0.0866112060772354	5.32467129376844	0.129356287436537	0.938563038615491	0.0144836265566807	0.0145338581608246	0.772617980752073	0.0292818313970857	0.0292734667021568	0.938507827793856	0.0143803064296091	0.0143079926304682	5.66706104561257	0.0865777614698507	1.00123951480134	0.0569047253348253	0.0564030561530362	0.001238747237072	0.0565067254871473	0.0559787196837419	0.25988284089038	0.112478273950288	5.68933894562815	0.266991013999074	1.0048166588042
952	3	B	EMS	EMS	1	1	1	10	H	4	H04	2	3	2	10	20	4	19791	15266	6886	6145	-0.1366951192124	56	5.66770131698223	0.104726703360156	5.35395467937171	0.146399203899002	0.943221110856848	0.015983297308511	0.0159839786337377	0.717779070819909	0.0397766267889671	0.039755668752699	0.942938366988507	0.0155054265619378	0.0154215467669728	5.66768340557951	0.104943842210729	1.01891790431563	0.0627983707374332	0.0625184715593608	0.0187411860447464	0.0618206099338813	0.0611514768806627	0.294529672055084	0.120427988112762	5.68996130559509	0.301637845163778	1.02262115704177
954	3	B	SHAM	SHAM	1	1	1	10	H	6	H06	2	3	2	10	20	4	17082	13537	6107	5443	-0.107659473548682	55	5.65773641553129	0.102131102823161	5.31402109357856	0.145338495287094	0.937749377330791	0.014708275834569	0.0147792220241423	0.782213990485011	0.0274907446057071	0.0274838224496231	0.937362793691669	0.0145147266448961	0.0144950746443978	5.65787878165431	0.102248397412698	0.996769423137072	0.0559996839039303	0.0564893565902395	-0.00323580644243792	0.0565086576435218	0.0563795428616193	0.250928670421868	0.113663593358427	5.68015668166989	0.258036843530562	1.00031467975831
956	3	B	EMS	EMS	1	1	1	10	H	8	H08	2	3	2	10	20	4	16915	12895	5558	4954	0.041501436174701	56	5.66319521007512	0.0916225556492584	5.32030314400404	0.127413947318409	0.93870442274485	0.0143800786600475	0.0141126308573756	0.796058864664442	0.0251881760718108	0.0251828512677807	0.938308631228749	0.0145022010295676	0.0139254718119624	5.66303800358932	0.0916184149614628	1.00045899386597	0.0569413258945422	0.0545771184914328	0.000458888552504811	0.0568629029678637	0.054340630896061	0.258325123123974	0.109006681208135	5.6853159036049	0.265433296232668	1.00403057002575
957	3	B	EMS	EMS	1	1	1	10	H	9	H09	2	3	2	10	20	4	17502	13489	5973	5265	-0.000616813096133484	56	5.67254578180988	0.101015395643722	5.32216965824242	0.138140099900608	0.936996560203881	0.014773806506274	0.0150228708282057	0.822410224573268	0.0202001605695376	0.0201974137071611	0.936829124064371	0.014770206780159	0.0148787343264719	5.6724371944815	0.100975436548337	0.994699668973865	0.0567454305947664	0.0576192654381895	-0.00531442761374612	0.0573131434855753	0.0576752925920396	0.246755372170257	0.116421961283127	5.69471509449708	0.253863545278951	0.998230161011782
958	3	B	EMS	PETITE	1	1	1	10	H	10	H10	2	3	2	10	20	4	18271	16227	9464	8813	-0.245755795755811	50	5.45383184953058	0.144547815486251	5.16200250698695	0.161884105353587	0.948747972694031	0.0138914343078411	0.0149720586608972	0.846251510529342	0.0187934767687256	0.0187912646515964	0.948495873794782	0.0135889733798664	0.0147626865323044	5.45385783666922	0.144590432110023	1.04197683676865	0.0576467961385414	0.06065062691371	0.0411197134954661	0.0553209672482174	0.058907953412264	0.337989393672314	0.111861349951335	5.4761357366848	0.345097566781008	1.04584458030034
962	3	C	EMS	EMS	1	1	1	11	A	2	A02	1	3	3	1	21	1	17464	12287	5816	5069	-0.048207180028462	57	5.66632325317256	0.110737015377324	5.33680583067788	0.152617142894714	0.940538737908363	0.0169392991370705	0.0172708618481324	0.776068318907889	0.029025950630047	0.0290178032375002	0.940482551606647	0.0168245511940518	0.0169912017224912	5.66614815516408	0.110803675834593	1.00904329217967	0.0667539138554177	0.0681005092918864	0.0090026464764748	0.0659010137885379	0.0669052725337789	0.275325187641608	0.133724148301972	5.68172073275333	0.264637555183239	1.00362947848159
963	3	C	EMS	EMS	1	1	1	11	A	3	A03	1	3	3	1	21	1	20999	15729	7070	6293	-0.033583070483461	56	5.66148897295657	0.10031327470864	5.32842649655528	0.134817305661997	0.940345303829593	0.0147993459035574	0.0152699163121421	0.794121778454578	0.0258277506277034	0.0258220099294	0.940019805565711	0.0148514564885203	0.0150547739247426	5.66168574610539	0.100379316032619	1.00720377173297	0.0589027401016296	0.0596486191661265	0.00717794851161404	0.0582665922450231	0.0590148847605182	0.271706512070053	0.117552385299761	5.67725832369464	0.261018879611684	1.00180951346655
964	3	C	EMS	EMS	1	1	1	11	A	4	A04	1	3	3	1	21	1	15482	10679	5222	4546	-0.15278674537739	57	5.65996275537691	0.10855972928319	5.32187997871992	0.158392865202766	0.94024335649858	0.0177216628289795	0.0176911894561747	0.744090191988617	0.0346562641818835	0.0346423994597499	0.939981828477601	0.01712839056724	0.0173128848385686	5.65985956081443	0.108459726462395	1.00705310242794	0.0670252177489005	0.0691693739041367	0.00702834420489876	0.0668658316387934	0.0680532210551175	0.271409536775069	0.136355880118138	5.67543213840368	0.2607219043167	1.00166044588511
[truncated: 4,906 more rows]
[truncated: 11 more columns]
