# Supplementary material for: Mutational sources of trans-regulatory variation affecting gene expression in Saccharomyces cerevisiae
Source: eLife. 2021 Aug 31;10:e67806. doi: 10.7554/eLife.67806 (PMC8456550; doi:10.7554/eLife.67806)
Supplement: Supplementary file 12. [file elife-67806-supp12.bz2 › Input_Files/Figure1B_SourceData2.txt]

sample	class	FL	num.ref.data	ref.FSCmean.in.range	ref.FSCmedian.in.range	ref.FSCvar.in.range	ref.YFPmean.in.range	ref.YFPmedian.in.range	ref.YFPvar.in.range	ref.RATIOmean.in.range	ref.RATIOmedian.in.range	ref.RATIOvar.in.range	num.unk.data	unk.FSCmean.in.range	unk.FSCmedian.in.range	unk.FSCvar.in.range	unk.YFPmean.in.range	unk.YFPmedian.in.range	unk.YFPvar.in.range	unk.RATIOmean.in.range	unk.RATIOmedian.in.range	unk.RATIOvar.in.range	unk.lower.percentile	unk.upper.percentile	unk.corr.coeff	unk.regression.slope	unk.FSCmean.overall	unk.FSCmedian.overall	unk.FSCvar.overall	Z.means	signifs.means	Z.medians	signifs.medians	Z.variances.YFPdivFSC	signifs.variances	Z.SD.YFPdivFSC	signifs.SD	Z.regressions	signifs.regressions	Z.FSCmedianinranges	signifs.FSCmedianinranges	Z.FSCmedianoveralls	signifs.FSCmedianoveralls	Z.YFPmeans	signifs.YFPmeans	Z.YFPmedians	signifs.YFPmedians	Z.YFPvariances	signifs.YFPvariances
8Q1D4	hi.EMS	1	30077	5.417009759	5.413768181	0.004497032	4.875400383	4.876393948	0.02386948	0.899978072	0.898742913	0.000622431	13360	5.424311247	5.422652206	0.004322455	5.057889231	5.08817863	0.078252603	0.932393305	0.937054659	0.002452226	0.12260479	0.736302395	0.306692437	1.304929955	5.466869483	5.446768543	0.035633532	8.50912179868558	VRAI	8.57759763075615	VRAI	-0.880060809407586	FAUX	-0.902058371600607	FAUX	0.761137286937328	FAUX	0.0278510103725025	FAUX	-0.521779148847163	FAUX	8.09152474755153	VRAI	8.140867139133	VRAI	-0.86291126536928	FAUX
3Q3C11	lo.EMS	1	17667	5.414823378	5.409474079	0.004766423	4.906431726	4.910624405	0.03516146	0.906078945	0.906287272	0.001011855	7490	5.425997922	5.426527526	0.004410925	4.617709315	4.653786362	0.102149864	0.850923347	0.857475437	0.00320387	0.1811749	0.731241656	0.330035837	1.588236436	5.450950216	5.442337853	0.047088411	-8.28828541213714	VRAI	-7.40927660433694	VRAI	0.760769991247528	FAUX	0.83279696302018	FAUX	2.33766492410589	FAUX	0.632950760698694	FAUX	0.200915946414477	FAUX	-7.65527694450887	VRAI	-7.08731056994363	VRAI	0.801292327786907	FAUX
1Q4D11	lo.EMS	1	18470	5.417305688	5.41444101	0.004617659	4.921299588	4.922032213	0.018732364	0.908399875	0.906632474	0.000436213	13801	5.420876616	5.418816503	0.004526979	4.778086489	4.796373096	0.063462097	0.881356125	0.883874275	0.00193372	0.182160713	0.738134918	0.351808814	1.317224126	5.451953721	5.434656712	0.043365951	-3.14070267520711	VRAI	-3.46875823792612	VRAI	-0.535972825073809	FAUX	-0.519370268746325	FAUX	0.203604757317165	FAUX	-1.39666809037007	FAUX	-1.33157204085865	FAUX	-3.03279513672644	VRAI	-3.3508754241444	VRAI	-0.526960477860361	FAUX
4Q2E12	lo.EMS	1	16902	5.422535783	5.420540743	0.004778811	4.940946431	4.950133523	0.035926797	0.911171088	0.910801574	0.001052358	7343	5.436126543	5.439401385	0.004449584	2.913498288	2.956888388	0.170879613	0.535891897	0.544422888	0.005699659	0.115620319	0.602887103	0.149942555	0.929202436	5.510428509	5.499964613	0.048715361	-84.8969051531148	VRAI	-98.8544096282157	VRAI	6.48458697079815	VRAI	5.30293549413801	VRAI	-5.53616978992108	VRAI	5.04517075799251	VRAI	3.96344781612776	VRAI	-81.6722078725854	VRAI	-94.1027745940353	VRAI	6.24232048877136	VRAI
7Q4D5	hi.EMS	1	16933	5.422326977	5.422123453	0.004837216	4.923165487	4.921431545	0.023171698	0.907895917	0.905811478	0.000565541	8922	5.443354161	5.449064735	0.004277701	5.045394407	5.066866127	0.0647382	0.926836999	0.929717907	0.00198457	0.089890159	0.550437122	0.333213599	1.296277003	5.54956769	5.525808362	0.050955984	4.22163629366645	VRAI	3.93001133554075	VRAI	-0.54361364034876	FAUX	-0.524686876259322	FAUX	0.702567736021751	FAUX	4.40435831400443	VRAI	2.58584240510329	VRAI	4.55375913095671	VRAI	4.35132146765569	VRAI	-0.537904059325917	FAUX
8Q4H5	hi.EMS	1	52738	5.418673785	5.415380726	0.004406349	4.910669721	4.914517686	0.027615742	0.906207553	0.905081288	0.00074725	6795	5.424406451	5.419643539	0.004538287	5.200967088	5.239706049	0.097539854	0.958735795	0.96559846	0.003055716	0.12803532	0.633406917	0.308488196	1.430156637	5.485630534	5.478189751	0.052446276	15.1265922431259	VRAI	16.1139132098618	VRAI	-0.0027427934742514	FAUX	0.0515498510998635	FAUX	2.54858066425325	FAUX	-0.603321691932156	FAUX	1.86690740637925	FAUX	14.3871675979244	VRAI	15.1333515750943	VRAI	0.0847631067298495	FAUX
4Q1G12	lo.EMS	1	26229	5.424736194	5.424468371	0.004701367	4.948643456	4.950433012	0.018671471	0.912196132	0.910354944	0.00042911	8673	5.447774558	5.455210428	0.00410259	4.589883899	4.625122019	0.091679364	0.842482638	0.847530406	0.002930637	0.079787847	0.555286521	0.24232751	1.145537831	5.533003818	5.52636642	0.042207542	-12.5417080210681	VRAI	-14.323348373156	VRAI	1.30332131942534	FAUX	1.33325335637784	FAUX	-2.11410183195628	FAUX	9.23786565955944	VRAI	5.85895813855496	VRAI	-11.2056365300691	VRAI	-12.5209745912125	VRAI	1.23341818241732	FAUX
10Q2E4	hi.EMS	1	42699	5.41320293	5.408838404	0.004404863	4.830322039	4.831997677	0.027237113	0.892278778	0.891729365	0.000735992	8445	5.417943529	5.414581471	0.004587691	5.102100507	5.171660646	0.138416503	0.941626769	0.953780485	0.004448517	0.23268206	0.739727649	0.261540201	1.436598098	5.421688284	5.420257833	0.071958379	11.7667055158465	VRAI	14.0396350768526	VRAI	2.83697921654473	VRAI	2.59996981612542	VRAI	2.29341705721066	FAUX	-0.918791411348164	FAUX	-0.916149233438168	FAUX	10.6307338902223	VRAI	12.4322554079513	VRAI	2.92167172403232	VRAI
6Q4G4	hi.EMS	1	44856	5.421859065	5.421441036	0.0045407	4.965249597	4.967695368	0.022401341	0.915736623	0.914354152	0.000550733	6098	5.446366424	5.453137076	0.004371545	5.001934283	5.101071351	0.223596367	0.918335563	0.938145841	0.007337342	0.084125943	0.468842243	0.187728151	1.342592713	5.589925022	5.56782948	0.067019859	5.64448396821469	VRAI	11.0393658575596	VRAI	8.17002582790963	VRAI	6.51320748930901	VRAI	0.445902401701234	FAUX	7.33526973741148	VRAI	8.11295305579037	VRAI	6.27729604905906	VRAI	10.6023345887932	VRAI	8.17572555433508	VRAI
6Q3G6	hi.EMS	1	32403	5.428650442	5.429846717	0.004447579	4.968823525	4.971073966	0.021406162	0.915243566	0.913657009	0.000505255	6948	5.418384586	5.414528804	0.004825961	5.034173789	5.074104824	0.10952421	0.929020263	0.937550872	0.003470237	0.293465746	0.770725389	0.285528405	1.360230348	5.402683882	5.398600502	0.047083439	8.4645162089684	VRAI	10.8616938414469	VRAI	1.53987160876627	FAUX	1.56775010857739	FAUX	0.69007895411396	FAUX	-2.09651525065435	FAUX	-3.98099693383775	VRAI	7.76280488540833	VRAI	9.22025749493068	VRAI	1.57764414894756	FAUX
4Q2G6	hi.EMS	1	45184	5.420472929	5.419135926	0.004692045	4.938837139	4.937477771	0.019450586	0.911099008	0.908813099	0.00044609	6998	5.419937997	5.41777385	0.004703817	5.010244198	5.035101392	0.085584163	0.924360426	0.928038362	0.002690351	0.242640755	0.804658474	0.28882544	1.231989261	5.405824554	5.408632518	0.044670127	6.78139179646986	VRAI	8.12882637018268	VRAI	0.853709290952561	FAUX	0.91199735764155	FAUX	-0.746583268832403	FAUX	-0.690638533434046	FAUX	-2.59371430695751	VRAI	6.46413395989297	VRAI	7.52828864856487	VRAI	0.847936233407398	FAUX
7Q4B12	lo.EMS	1	13272	5.423980686	5.421839106	0.004768959	4.924409305	4.925273406	0.021636981	0.907859557	0.906554621	0.000536636	6984	5.420340465	5.418690656	0.004649382	4.692613859	4.715681655	0.07024625	0.865701277	0.869750825	0.002212668	0.17812142	0.613688431	0.288116654	1.119907893	5.502416586	5.473602278	0.058858689	-8.1966834922911	VRAI	-7.80434720792156	VRAI	-0.185855027887938	FAUX	-0.131113497594777	FAUX	-1.19741593260712	FAUX	-1.61362909875202	FAUX	-0.048145847934562	FAUX	-7.96287359039273	VRAI	-7.83164336152316	VRAI	-0.24811404470479	FAUX
6Q4C6	hi.EMS	1	24863	5.42220779	5.420996477	0.004539198	4.933145577	4.933178414	0.021090273	0.909752512	0.908736161	0.000498018	9706	5.424184059	5.422802338	0.004502565	4.751065339	4.769148301	0.063495658	0.875845841	0.878987359	0.001945324	0.165258603	0.707603544	0.334612535	1.256562915	5.465067606	5.447879442	0.043092789	-5.56990538671922	VRAI	-6.62677602059851	VRAI	-1.07459279309935	FAUX	-1.16900664431415	FAUX	-0.745099650467506	FAUX	-0.0753371523582723	FAUX	-0.459277173160117	FAUX	-5.28206323757556	VRAI	-6.40924589133278	VRAI	-1.08470695455715	FAUX
8Q4E6	hi.EMS	1	41535	5.416903997	5.413116953	0.004431765	4.900161951	4.902921665	0.023793918	0.904569626	0.903517829	0.000624848	9586	5.467042963	5.475075259	0.003219441	5.001732827	5.081754043	0.165008693	0.914771127	0.929094283	0.005262891	0.037137492	0.471833924	0.278387627	1.993026686	5.577806112	5.560488286	0.0432415	4.08227216975279	VRAI	6.47584861476705	VRAI	3.20591748559857	VRAI	2.91097155425215	VRAI	10.5827976961677	VRAI	11.0254123972142	VRAI	8.12336336661249	VRAI	5.62055774568168	VRAI	7.84439390081447	VRAI	3.39982804965937	VRAI
9Q1A5	hi.EMS	1	29095	5.420578551	5.418092382	0.00444237	4.924357775	4.921878875	0.023361767	0.908417372	0.906138271	0.000601587	12866	5.425689306	5.425216208	0.004392773	5.037760801	5.098011709	0.142411442	0.928425585	0.939171875	0.00459441	0.150007772	0.705269703	0.252377768	1.436991319	5.460649567	5.452617398	0.046516921	4.74288777419413	VRAI	5.53439732414587	VRAI	1.83467079044578	FAUX	1.79100860325422	FAUX	1.08832869898967	FAUX	-0.541832877681393	FAUX	-1.62477946048558	FAUX	4.73163421341315	VRAI	5.56165893716157	VRAI	1.84144403692011	FAUX
6Q4E5	hi.EMS	1	28423	5.424905672	5.424773866	0.004513187	4.949209467	4.952046191	0.020942381	0.912256916	0.911067144	0.000485502	6086	5.425047543	5.425833265	0.004474738	4.940255912	4.9918549	0.119609742	0.910572979	0.919622136	0.003831591	0.186493592	0.685672034	0.259263729	1.340421032	5.4660626	5.452137714	0.0532173	3.5956911006977	VRAI	5.50774317935856	VRAI	2.15941329374879	FAUX	2.12074971676235	FAUX	0.415837510375373	FAUX	0.665101367617875	FAUX	-0.154959737583342	FAUX	3.43532430383041	VRAI	5.00481900215276	VRAI	2.16100439129522	FAUX
4Q2A6	hi.EMS	1	19056	5.41780852	5.416583929	0.004703081	4.880463962	4.878975385	0.01908097	0.900774532	0.898957945	0.000441363	6876	5.467540851	5.478927056	0.003471444	4.976766705	5.020373715	0.098060726	0.910192173	0.917306428	0.003126218	0.042757417	0.407649796	0.245932204	1.307097109	5.595424958	5.583478197	0.041977688	3.43769415091144	VRAI	5.13588915659875	VRAI	1.66928342350438	FAUX	1.66353496344243	FAUX	0.441498598365013	FAUX	15.5277204785993	VRAI	9.95928213666858	VRAI	5.05691348903374	VRAI	6.80805955283568	VRAI	1.63699795953999	FAUX
2Q1H10	lo.EMS	1	13987	5.422234282	5.420808637	0.004733388	4.953038673	4.953344039	0.019518261	0.913427206	0.911777173	0.000456443	17000	5.422664858	5.420208325	0.004606226	4.747674947	4.779895777	0.084083558	0.875437435	0.880076361	0.002605622	0.150588235	0.647411765	0.334639648	1.429750738	5.492066999	5.466935057	0.050645388	-3.70393247377381	VRAI	-3.24046555541555	VRAI	0.511271098606522	FAUX	0.574190646426868	FAUX	0.827820110188234	FAUX	-0.525132948622832	FAUX	0.351269782058466	FAUX	-3.72418669283264	VRAI	-3.24045112648054	VRAI	0.533969237151606	FAUX
3Q3A11	lo.EMS	1	18151	5.424226114	5.423580889	0.004779132	4.90388477	4.90728771	0.028978253	0.904029382	0.903567804	0.000779343	5866	5.425648201	5.425173789	0.004304338	4.753892905	4.78582792	0.091125188	0.87611936	0.881068145	0.002878439	0.16621207	0.717013297	0.293634042	1.351053205	5.457521122	5.447012983	0.044003124	-3.56229191058476	VRAI	-3.22485172735297	VRAI	0.315054670170533	FAUX	0.391631876114543	FAUX	0.0399470563269192	FAUX	0.47289516443021	FAUX	0.404953007910447	FAUX	-3.24653627181443	VRAI	-2.99440442742261	VRAI	0.295046583148336	FAUX
1Q1A5	hi.EMS	1	22101	5.416469902	5.413299764	0.004551577	4.887971607	4.884010432	0.022480765	0.902382366	0.900244006	0.00056005	6224	5.467088428	5.480485554	0.003723916	4.981847955	5.034788831	0.114552421	0.911165525	0.920420028	0.00363622	0.072782776	0.439267352	0.275054282	1.525529444	5.580232523	5.575206902	0.051420982	4.44212060465894	VRAI	6.21558521686166	VRAI	3.26723498150851	VRAI	2.9884477131332	VRAI	3.20602759025838	VRAI	11.2153673389054	VRAI	6.90855056249038	VRAI	5.62871168481718	VRAI	6.92105780054736	VRAI	3.30224292495109	VRAI
1Q1C4	hi.EMS	1	19626	5.422641405	5.421467366	0.004614389	4.908064224	4.908023671	0.018329989	0.905066396	0.903205761	0.000425576	8514	5.447631087	5.454620035	0.004196738	4.974022758	5.004031029	0.078331592	0.913016956	0.917296075	0.002455363	0.091731266	0.573760864	0.284012737	1.227016343	5.53317236	5.519356705	0.044544214	4.91308191511354	VRAI	5.38776169962247	VRAI	0.629323345175249	FAUX	0.678950821230889	FAUX	-1.09661124287255	FAUX	5.92556902460008	VRAI	3.63418664522215	VRAI	5.2960776567747	VRAI	5.595884827873	VRAI	0.587503404813153	FAUX
1Q1D6	hi.EMS	1	14677	5.422794113	5.420000331	0.004585522	4.919929902	4.918609534	0.016840363	0.907226829	0.905065016	0.00036982	6558	5.429185464	5.431551918	0.00460676	4.930822018	4.94781589	0.052686238	0.908148302	0.910106427	0.001563334	0.141201586	0.629002745	0.378475045	1.279935453	5.507065783	5.481322213	0.051603985	3.67460871898033	VRAI	3.4825602785154	VRAI	-1.36337659990423	FAUX	-1.47223389046552	FAUX	-0.33385806072418	FAUX	1.20787183009221	FAUX	1.40431504393798	FAUX	3.4596975425595	VRAI	3.17390477682996	VRAI	-1.33460765486821	FAUX
1Q1E6	hi.EMS	1	16853	5.421859605	5.420940463	0.004613296	4.930453806	4.931155182	0.018496298	0.909332287	0.907158849	0.000440071	8540	5.42390909	5.421878564	0.004632041	4.907587177	4.925234716	0.058491097	0.904759994	0.907053023	0.00178117	0.165105386	0.678337237	0.337264833	1.198477055	5.480866326	5.456024233	0.047189678	2.81270137492925	VRAI	2.67343170365137	VRAI	-0.876753647919114	FAUX	-0.899688054218273	FAUX	-1.50796420663647	FAUX	-0.770441138724623	FAUX	-0.0788452194318199	FAUX	2.47202927647538	FAUX	2.20101466341885	FAUX	-0.899535334018558	FAUX
1Q1F12	lo.EMS	1	20462	5.42156788	5.420280935	0.004538873	4.948811807	4.947938307	0.0207584	0.912759796	0.910914559	0.000503006	11416	5.42129971	5.418034334	0.004649814	4.943722706	4.970230615	0.083695089	0.911847921	0.916940365	0.002625805	0.221093203	0.715049054	0.303703987	1.288494886	5.442233824	5.433213611	0.048651572	4.61570639554662	VRAI	5.29350128555185	VRAI	1.01007303385044	FAUX	1.04225613909019	FAUX	-0.210486092485564	FAUX	-1.55663071310753	FAUX	-1.4161776124983	FAUX	4.00808090133749	VRAI	4.13962358079157	VRAI	0.98949578527582	FAUX
1Q1F5	hi.EMS	1	26834	5.421982521	5.419927675	0.004653532	4.941124771	4.941203243	0.021571886	0.911267894	0.909429562	0.000522092	9124	5.429757676	5.431815517	0.004451864	4.911242549	4.946162311	0.090948037	0.904442593	0.909805902	0.002870653	0.142371767	0.628014029	0.291077331	1.315630958	5.499010783	5.481005247	0.053239824	2.73196188698743	VRAI	3.40292346499154	VRAI	1.55703798247074	FAUX	1.54411166687456	FAUX	0.180641522264707	FAUX	1.26178087965945	FAUX	1.38573208292527	FAUX	2.62741208822487	VRAI	3.102661773218	VRAI	1.53310191237759	FAUX
1Q1G1	hi.sham	1	14996	5.420821831	5.418052578	0.00480471	4.958841251	4.954570519	0.019036198	0.914736159	0.911856538	0.000437751	9180	5.428360457	5.430532179	0.004516546	4.913033282	4.934975406	0.074342872	0.905017575	0.908218933	0.002314112	0.155010893	0.658278867	0.303787948	1.232500103	5.489717577	5.469000495	0.05602566	2.87822403567558	VRAI	2.98238888610077	VRAI	0.313783312348489	FAUX	0.368194712787121	FAUX	-1.0175706960807	FAUX	0.999323389860554	FAUX	0.681922089478847	FAUX	2.70353269335962	VRAI	2.62068376471547	VRAI	0.288550119708481	FAUX
1Q1G5	hi.EMS	1	25945	5.417214568	5.413988388	0.004512041	4.938707514	4.934924961	0.01872972	0.911624279	0.90965334	0.000430627	5536	5.439337298	5.442484473	0.004245102	4.849750024	4.969616238	0.216822742	0.89147376	0.91322611	0.007056184	0.142882948	0.555635838	0.253156935	1.809248411	5.531695968	5.517802034	0.077401144	-0.567009873098136	FAUX	4.30925227859712	VRAI	10.9070786132445	VRAI	8.08034298159875	VRAI	7.29543016930965	VRAI	3.44370599255571	VRAI	3.54303999043732	VRAI	0.0134834823056568	FAUX	4.1131536855945	VRAI	10.9673706931723	VRAI
1Q1H11	lo.EMS	1	20072	5.424225628	5.422985219	0.004614178	4.946437128	4.94610823	0.021760158	0.911878817	0.910088328	0.000544711	13068	5.429736067	5.431611402	0.004540306	4.642161731	4.697368853	0.123146499	0.85486008	0.86382495	0.003932759	0.159090909	0.670492807	0.278067765	1.448168564	5.476902201	5.465858528	0.048553363	-9.88068492410775	VRAI	-8.78167515433672	VRAI	3.92967224421401	VRAI	3.50636731076543	VRAI	2.09098129802485	FAUX	1.22003699727579	FAUX	0.497716053928986	FAUX	-8.81069437226522	VRAI	-7.61638656189356	VRAI	3.94636631554902	VRAI
1Q1H2	hi.sham	1	14558	5.423248732	5.422929461	0.004621379	4.958230689	4.956422975	0.022182526	0.914216347	0.912145709	0.000552638	9955	5.429864922	5.430595832	0.004464705	4.892281866	4.929725378	0.097479247	0.900931074	0.906791186	0.003088087	0.15901557	0.65233551	0.28319054	1.323239458	5.486359471	5.470736751	0.055124581	1.83871250857354	FAUX	2.60404691256028	VRAI	2.04276290829536	FAUX	1.97210633503548	FAUX	0.290307153194173	FAUX	1.01234116584639	FAUX	0.78371463996059	FAUX	1.82143003298376	FAUX	2.3944909044004	FAUX	2.02261400778877	FAUX
1Q2A10	lo.EMS	1	21037	5.417430411	5.414610728	0.004652416	4.88487548	4.883791988	0.017231003	0.901659997	0.899630417	0.000394294	11753	5.422273753	5.420030051	0.004322374	4.7583078	4.790608829	0.078686177	0.877476477	0.882176531	0.002448222	0.181485578	0.73649281	0.320430444	1.367167829	5.44901664	5.434444346	0.045946355	-4.12759557382588	VRAI	-3.91864733979536	VRAI	0.613371094398859	FAUX	0.663458442838101	FAUX	0.92347170881206	FAUX	-1.14848346416064	FAUX	-1.34402255321141	FAUX	-3.87354904892438	VRAI	-3.59922382159096	VRAI	0.614079436873272	FAUX
1Q2C10	lo.EMS	1	22436	5.419396696	5.417563857	0.004612342	4.90476276	4.904888579	0.019337051	0.904994346	0.903820291	0.000450524	10294	5.43537905	5.440932684	0.004590576	4.467555468	4.511228084	0.095484107	0.821823089	0.828409913	0.002960276	0.185156402	0.700116573	0.344164034	1.569630553	5.447607335	5.463519723	0.057434111	-18.2845328530002	VRAI	-18.1663875659819	VRAI	1.75724643665537	FAUX	1.722423115498	FAUX	3.84168191675824	VRAI	3.12634716297413	VRAI	0.360597491902672	FAUX	-16.2328697607105	VRAI	-15.6360986398769	VRAI	1.87307890448652	FAUX
1Q2C4	hi.EMS	1	25364	5.421930212	5.421246803	0.004618611	4.908731143	4.908653878	0.020414606	0.905301827	0.903505242	0.000483733	8278	5.417124636	5.413780743	0.004667823	4.941181233	4.967145318	0.076997508	0.912084853	0.918691129	0.002411802	0.280864943	0.756221309	0.311476492	1.265046268	5.411469623	5.404039633	0.048413792	4.6759764273267	VRAI	5.75744027961988	VRAI	0.53201260493294	FAUX	0.584091512275758	FAUX	-0.548464338840831	FAUX	-2.42653935486108	FAUX	-3.12657839920239	VRAI	3.90004778713587	VRAI	4.00669626052748	VRAI	0.487514236757842	FAUX
1Q2C6	hi.EMS	1	31562	5.421230135	5.419428661	0.004587872	4.907266999	4.90719631	0.02156344	0.9051489	0.903532233	0.000525901	7513	5.459800126	5.47141934	0.003918513	5.011069363	5.100239548	0.172633278	0.917645149	0.933626192	0.005450386	0.09290563	0.478503927	0.327709562	2.175157661	5.560368296	5.55929004	0.05007493	6.09038738332536	VRAI	9.71511710217413	VRAI	7.31989301007604	VRAI	5.8944034658141	VRAI	12.5694879683736	VRAI	9.36122153443368	VRAI	5.97538288523155	VRAI	6.87085736474229	VRAI	9.74094464456039	VRAI	7.6553845347519	VRAI
1Q2D5	hi.EMS	1	26130	5.419471872	5.418188559	0.004522025	4.912969198	4.911958848	0.018295403	0.906495382	0.904704927	0.000415594	9009	5.456323173	5.465000445	0.003817812	4.910888511	4.963608408	0.112065301	0.89992464	0.908228377	0.003500531	0.072372072	0.557775558	0.325441701	1.763199806	5.544210919	5.529839559	0.045785145	1.58269893014362	FAUX	2.98489147346262	VRAI	2.96411987779788	VRAI	2.74442525504449	VRAI	6.63170547709084	VRAI	8.04848313739247	VRAI	4.2487713867512	VRAI	2.61236261585757	VRAI	3.85431158951679	VRAI	3.1158340783914	VRAI
1Q2E4	hi.EMS	1	22970	5.418466825	5.41565599	0.004551525	4.924556028	4.923049631	0.018956676	0.908802312	0.906792435	0.0004388	9145	5.455105977	5.463816122	0.003747921	4.796814718	4.844604525	0.096878677	0.879215566	0.886131897	0.00299771	0.082668125	0.528376162	0.343731246	1.747583251	5.554724526	5.537686898	0.052068898	-3.6852114750195	VRAI	-2.87050577233637	VRAI	1.84087009658582	FAUX	1.79610054091321	FAUX	6.4066152021326	VRAI	7.80627536228482	VRAI	4.70884216623601	VRAI	-2.23669425257332	FAUX	-1.27286652922199	FAUX	1.97760147884833	FAUX
1Q2E5	hi.EMS	1	16234	5.420371448	5.418360961	0.004623735	4.936534518	4.934331771	0.021325358	0.910695003	0.908422898	0.000518619	9462	5.431914032	5.433601842	0.004407916	4.934520603	4.949038525	0.057777199	0.908380728	0.909445081	0.00175769	0.118896639	0.650285352	0.344418482	1.246947136	5.501610773	5.479710601	0.044987384	3.73373252837088	VRAI	3.30730867523197	VRAI	-0.929205524159087	FAUX	-0.959651225450768	FAUX	-0.809337405812734	FAUX	1.62710503858307	FAUX	1.30983007405617	FAUX	3.61691725557218	VRAI	3.22658093546591	VRAI	-0.953041760222868	FAUX
1Q2F10	lo.EMS	1	28501	5.421231852	5.419787282	0.00461794	4.930625991	4.928016703	0.019692547	0.909453405	0.907443921	0.000452115	5323	5.434294479	5.436867604	0.004227428	4.702712582	4.805290115	0.200949262	0.865317669	0.883965	0.006629061	0.1705805	0.662408416	0.185193475	1.276823232	5.472366271	5.472289734	0.057038129	-7.22051567144011	VRAI	-3.44471681073387	VRAI	9.9529302855083	VRAI	7.52559545929716	VRAI	-0.378716269248455	FAUX	2.29499120481546	FAUX	0.874762331329223	FAUX	-6.23679451140157	VRAI	-2.96669346681131	VRAI	9.7776584566545	VRAI
1Q2F4	hi.EMS	1	19151	5.421546197	5.420275158	0.004649413	4.923991847	4.922650209	0.018623127	0.908178989	0.906113335	0.000417494	10043	5.434920268	5.437262103	0.004353901	4.934603739	4.966667263	0.081058987	0.907844595	0.912440689	0.002468	0.123070796	0.654485711	0.366233581	1.58022691	5.497146073	5.480063024	0.044185908	3.59735266854464	VRAI	4.10112175463164	VRAI	0.657553087936942	FAUX	0.706311647970035	FAUX	3.99441322726082	VRAI	2.37567082099472	FAUX	1.33049179445824	FAUX	3.62045120654559	VRAI	3.98609967935916	VRAI	0.79192078558394	FAUX
1Q2G5	hi.EMS	1	25933	5.421590569	5.419694763	0.004612548	4.944261149	4.941859127	0.02199734	0.911908165	0.909878682	0.000528791	10303	5.422834041	5.420813582	0.004705095	5.042102234	5.074999186	0.086867199	0.929705073	0.935409528	0.002680331	0.176841697	0.681063768	0.341101256	1.465639082	5.467665418	5.453726446	0.050173334	9.15815367384497	VRAI	10.1876874257159	VRAI	1.13187844287347	FAUX	1.1559759123276	FAUX	2.34279379446103	FAUX	-0.9882422966432	FAUX	-0.213558993894737	FAUX	8.19000484210968	VRAI	8.65348574411891	VRAI	1.22724441270853	FAUX
1Q2H6	hi.EMS	1	30043	5.422662298	5.420647921	0.004567098	4.935426084	4.933914791	0.019624553	0.910098111	0.908212818	0.000449356	9595	5.433066569	5.436574475	0.00451688	4.904203293	4.947536646	0.102390556	0.902604125	0.910215558	0.00326244	0.128921313	0.639082856	0.263909585	1.256509719	5.496227606	5.482970718	0.047323564	2.26429806451235	FAUX	3.51147915413863	VRAI	2.43224936392006	FAUX	2.30452184113508	FAUX	-0.671506466992939	FAUX	2.23504292811262	FAUX	1.50096296246608	FAUX	2.32818689584925	FAUX	3.16187379355027	VRAI	2.39071504263557	FAUX
1Q3A6	hi.EMS	1	21724	5.422209006	5.421255035	0.004547827	4.909743981	4.908801242	0.020937994	0.90544317	0.90353572	0.00050609	10784	5.420837066	5.419657585	0.004659457	5.108868797	5.142717879	0.088377224	0.942412668	0.947956442	0.002802705	0.199091246	0.704284125	0.270620826	1.178592662	5.461261296	5.440140517	0.047625989	12.3906725167975	VRAI	13.5125231316236	VRAI	1.40524922238754	FAUX	1.4070613094747	FAUX	-1.79456925414839	FAUX	-1.22465707656469	FAUX	-1.01006962572241	FAUX	11.0281226286961	VRAI	11.5710863486235	VRAI	1.34042030230223	FAUX
1Q3C6	hi.EMS	1	40964	5.422274341	5.42082347	0.004565478	4.90729094	4.906097893	0.020975214	0.904975192	0.903242915	0.000498264	5409	5.433913088	5.435966136	0.004123283	5.073519132	5.102983943	0.067679271	0.933624998	0.93659576	0.002092454	0.163801072	0.739508227	0.321840616	1.303908456	5.45548948	5.452068712	0.040115223	10.1552921115636	VRAI	10.5020297818594	VRAI	-0.181377589849117	FAUX	-0.139247465757619	FAUX	0.0116784444041645	FAUX	2.11063055437588	FAUX	-0.310747986693262	FAUX	9.5254765663794	VRAI	9.85918450059244	VRAI	-0.210884638704439	FAUX
1Q3G6	hi.EMS	1	17922	5.422325487	5.420734468	0.004625685	4.946382379	4.94663891	0.022628205	0.912178487	0.910290806	0.000554864	10330	5.438602702	5.442335503	0.004280027	5.059939142	5.087792062	0.070600625	0.930297607	0.933366143	0.002136488	0.100096805	0.628557599	0.359905645	1.461738416	5.511047761	5.494354294	0.042226811	9.3088806461863	VRAI	9.64620611733073	VRAI	-0.0830102168358735	FAUX	-0.0363762289558911	FAUX	2.28657128043919	FAUX	3.41323990158398	VRAI	2.16835488776011	FAUX	8.94821739009581	VRAI	9.20465560723118	VRAI	0.00806990692766257	FAUX
1Q3H11	lo.EMS	1	15314	5.418251731	5.414784556	0.004644555	4.920074135	4.915436772	0.023221726	0.90800941	0.905927612	0.000577937	10969	5.423907727	5.422284446	0.004471043	4.709025441	4.747411808	0.092301766	0.868132709	0.874031563	0.002923359	0.178411888	0.707357097	0.28577307	1.298440026	5.461740157	5.445087101	0.052747637	-6.50443447404083	VRAI	-6.0770012130965	VRAI	1.67477770091639	FAUX	1.64930559104587	FAUX	-0.0671411423926592	FAUX	-0.687433567161635	FAUX	-0.720063197216187	FAUX	-5.96844705412553	VRAI	-5.46032965513676	VRAI	1.63456346688416	FAUX
1Q4A4	hi.EMS	1	27932	5.424289197	5.424465102	0.004578486	4.910385113	4.910912416	0.020673358	0.905214239	0.903791167	0.000496446	10120	5.422882262	5.421605572	0.004931936	4.974909307	5.004622266	0.080315138	0.917351976	0.923996297	0.002517755	0.254150198	0.733102767	0.286764918	1.157220186	5.426936038	5.424571315	0.043745698	6.01581093933693	VRAI	7.16326899513024	VRAI	0.768700579517854	FAUX	0.813363077722125	FAUX	-2.10262288693605	FAUX	-0.826271165619495	FAUX	-1.92285482591535	FAUX	5.33376314442784	VRAI	5.62135775642769	VRAI	0.73616954153276	FAUX
1Q4E12	lo.EMS	1	20047	5.421001954	5.419065607	0.004603028	4.936161689	4.935295609	0.022286302	0.91052173	0.908775483	0.000556687	11523	5.42657641	5.426384366	0.00479874	4.566134951	4.592198971	0.077960105	0.841354803	0.845018258	0.002404803	0.226763864	0.696086089	0.337372041	1.359820857	5.450280032	5.44590297	0.05005777	-13.3161156552409	VRAI	-13.7653038834098	VRAI	0.516377567377422	FAUX	0.568770714026625	FAUX	0.817575629453302	FAUX	0.151047574654422	FAUX	-0.672230742573002	FAUX	-12.042446118643	VRAI	-12.1475388583337	VRAI	0.559660573272288	FAUX
1Q4E5	hi.EMS	1	20621	5.418611783	5.415572595	0.004664986	4.929716483	4.930480372	0.020805523	0.90972804	0.907986082	0.000492758	9921	5.466880783	5.479419817	0.003692676	5.018916618	5.036517114	0.063967279	0.918036558	0.919803513	0.002015293	0.060578571	0.437254309	0.262818806	1.093867574	5.578412276	5.570819539	0.040157176	6.18995279816593	VRAI	6.05221348376237	VRAI	-0.353747233058338	FAUX	-0.322154733780674	FAUX	-3.01576005799601	VRAI	10.9974117747393	VRAI	6.65132992817184	VRAI	7.20442903581035	VRAI	6.9955193606007	VRAI	-0.489097248935856	FAUX
1Q4F6	hi.EMS	1	46925	5.424181406	5.423596446	0.004556078	4.941083154	4.939529236	0.021513843	0.910879743	0.908657064	0.000502633	5299	5.428244735	5.430590192	0.004540744	5.025312605	5.054501975	0.085137027	0.925683379	0.929571332	0.002618947	0.21041706	0.765238724	0.345016044	1.493946432	5.428786312	5.434164758	0.039141407	8.1351275516252	VRAI	8.64061038996928	VRAI	0.994752975619867	FAUX	1.02786977999123	FAUX	2.7508037041267	VRAI	1.01118772050126	FAUX	-1.36041413118388	FAUX	7.47631010399524	VRAI	7.77038135218597	VRAI	1.09756857605012	FAUX
1Q4G11	lo.EMS	1	15054	5.418170719	5.414190914	0.004669566	4.932934027	4.931127193	0.021418436	0.910405768	0.908611672	0.000532667	10235	5.423906346	5.421900757	0.004590847	4.697364414	4.717325092	0.065682075	0.865983988	0.868970365	0.002019719	0.169809477	0.704250122	0.338047636	1.278659481	5.468146039	5.447714502	0.045797119	-7.05101949825255	VRAI	-7.41817975509246	VRAI	-0.343860009709184	FAUX	-0.311569392584017	FAUX	-0.352249369711277	FAUX	-0.765902413095671	FAUX	-0.566024939650257	FAUX	-6.4641348153566	VRAI	-6.75658947499412	VRAI	-0.360573838547473	FAUX
1Q4H10	lo.EMS	1	17136	5.417371167	5.415053515	0.004628752	4.919785926	4.915892952	0.020379921	0.908108608	0.906236602	0.000488998	11620	5.418314287	5.414306361	0.004521545	4.621147032	4.657887295	0.096804826	0.852806222	0.859207642	0.00307983	0.195266781	0.746643718	0.281607345	1.303013949	5.439786528	5.424932247	0.04765888	-10.4031389908095	VRAI	-10.0052262604951	VRAI	2.02431762967043	FAUX	1.956133981183	FAUX	-0.00121459292590599	FAUX	-2.31904438403257	FAUX	-1.90169424312656	FAUX	-9.7039886850436	VRAI	-9.31741492473545	VRAI	1.97206637007703	FAUX
1Q4H4	hi.EMS	1	21138	5.422954714	5.42157596	0.004591715	4.928593824	4.926249815	0.020275745	0.908787734	0.906748388	0.000469209	8631	5.431920363	5.433179176	0.004724646	4.921137602	4.962208281	0.111963935	0.905871914	0.913761132	0.003522451	0.175993512	0.666203221	0.307138586	1.49516394	5.471859411	5.469334449	0.04928711	3.09554815686209	VRAI	4.45102899349659	VRAI	3.0130868764001	VRAI	2.78416234894327	VRAI	2.76835233828345	VRAI	1.54066494456016	FAUX	0.701501016436353	FAUX	3.04803170164597	VRAI	3.79398834344376	VRAI	3.10823672919218	VRAI
2Q1B5	hi.EMS	1	18439	5.419272664	5.417048818	0.004594347	4.92733696	4.926115974	0.019208205	0.909176264	0.90715694	0.000436954	10714	5.44580915	5.453238814	0.004382382	5.062076401	5.093404173	0.083846533	0.929486477	0.935075703	0.002627702	0.085682285	0.563095016	0.288902285	1.263683803	5.535772714	5.523017696	0.045320461	6.01353520935464	VRAI	5.94877985589235	VRAI	0.548806516683362	FAUX	0.610637293711444	FAUX	-0.980883657502382	FAUX	4.69631590428801	VRAI	2.55843739501165	FAUX	6.61780379567627	VRAI	6.33403453535646	VRAI	0.520467134378033	FAUX
2Q1B6	hi.EMS	1	20196	5.41987277	5.417769701	0.004549479	4.922081319	4.920358158	0.019857783	0.908107929	0.90613814	0.000464518	15412	5.472829916	5.486235604	0.003367945	4.961126988	5.012649551	0.119245037	0.906418541	0.915137762	0.003794201	0.039384895	0.349532832	0.274251126	1.631871853	5.611345	5.603379326	0.041700137	1.86615508379246	FAUX	2.61756485980789	VRAI	2.53182407335077	FAUX	2.35610815156621	FAUX	3.02920488452834	VRAI	9.91243763034672	VRAI	5.7211200045109	VRAI	3.29715163016003	VRAI	3.86780402819624	VRAI	2.53693897928347	FAUX
2Q1C5	hi.EMS	1	12038	5.421219263	5.419607182	0.004809359	4.945738909	4.939509269	0.023066697	0.912227855	0.90971504	0.000530496	8945	5.408700805	5.401589211	0.004835528	5.14268124	5.159032997	0.064947505	0.950782745	0.953149616	0.002013839	0.291112353	0.775628843	0.31527502	1.155443889	5.415549092	5.386613098	0.049299096	9.8423874591548	VRAI	8.9685545670085	VRAI	-0.49474440482495	FAUX	-0.467670019200914	FAUX	-2.15976938973022	FAUX	-3.46843637466403	VRAI	-2.80985155022677	VRAI	9.26923707519856	VRAI	8.3383261026905	VRAI	-0.556113894528714	FAUX
2Q1D6	hi.EMS	1	30561	5.426211913	5.427396839	0.00455621	4.936008711	4.9373925	0.019908146	0.909598538	0.907896473	0.000438662	16525	5.427219403	5.42768406	0.004715173	4.973010996	4.986520935	0.060939448	0.916227936	0.919608631	0.001794355	0.159515885	0.63612708	0.396231081	1.424455739	5.491340636	5.474688194	0.045630892	3.62978447251579	VRAI	3.3645540227475	VRAI	-0.867861420276819	FAUX	-0.892553891764847	FAUX	0.770150083092123	FAUX	0.656628784920231	FAUX	0.656399376355708	FAUX	3.68806679972335	VRAI	3.06984115878828	VRAI	-0.784432415935047	FAUX
2Q1G12	lo.EMS	1	24219	5.426077774	5.426185011	0.004565297	4.959602944	4.960051976	0.019483801	0.913973192	0.911714314	0.000428597	24505	5.437704946	5.440301274	0.004189101	4.951797224	4.998869364	0.106856322	0.910556265	0.918270375	0.003371292	0.066639461	0.530993675	0.298358004	1.506875493	5.556762904	5.532602795	0.048351209	2.6100757485048	VRAI	3.14095929670231	VRAI	1.81288991920863	FAUX	1.75926584649272	FAUX	1.66781775903215	FAUX	2.65115383016657	VRAI	2.93566500870773	VRAI	2.99025632379152	VRAI	3.44695978755609	VRAI	1.83121720663292	FAUX
2Q1G4	hi.EMS	1	33737	5.424340258	5.423635744	0.004581131	4.955283048	4.956129996	0.0192264	0.91347494	0.91155334	0.000429358	12665	5.452263167	5.458350742	0.003855342	5.118535561	5.177585554	0.132172236	0.938708393	0.949316568	0.004218228	0.056612712	0.414370312	0.268122367	1.56989899	5.623531342	5.596166986	0.070000916	7.67154185277536	VRAI	8.32813201894741	VRAI	3.25265879802778	VRAI	2.921969424784	VRAI	2.35423276679356	FAUX	5.50440780361674	VRAI	5.437273817073	VRAI	8.47498380639341	VRAI	8.90491759833555	VRAI	3.27333543312768	VRAI
2Q2C10	lo.EMS	1	21014	5.421777587	5.420279285	0.004656358	4.912997955	4.913940944	0.021971691	0.906116654	0.90481508	0.000536829	25350	5.433822809	5.436106965	0.004389151	3.008980694	3.0523091	0.07336678	0.553657417	0.561474078	0.002347972	0.095463511	0.571558185	0.287763507	1.176508885	5.536004843	5.511668164	0.049485431	-61.556704887233	VRAI	-56.4722763485332	VRAI	0.0732728890278096	FAUX	0.136906920108245	FAUX	-1.9303417939744	FAUX	1.98811884098407	FAUX	2.11176940828269	FAUX	-60.9171773682229	VRAI	-56.0006134684076	VRAI	-0.0765108301727659	FAUX
2Q2C4	hi.EMS	1	20911	5.422410893	5.421202346	0.004599432	4.915916425	4.917697145	0.021872761	0.90653632	0.905135961	0.000515467	14065	5.463836019	5.474704207	0.00364328	4.97606216	5.036720694	0.129206549	0.910631945	0.920320492	0.004083873	0.039886242	0.454745823	0.282559946	1.682699563	5.594187005	5.565410944	0.048632083	2.62368224229352	VRAI	3.4834911807182	VRAI	3.02425883898277	VRAI	2.74588521770029	VRAI	3.58279052504182	VRAI	8.08955817984544	VRAI	4.2268503952182	VRAI	3.78843245855035	VRAI	4.6029320708836	VRAI	3.1043954028851	VRAI
2Q2H1	hi.sham	1	20113	5.420662912	5.417264046	0.004632733	4.944602008	4.94408274	0.022461783	0.912119391	0.910401978	0.000531511	10955	5.423260012	5.421927882	0.004592064	5.002328528	5.053016946	0.150879626	0.922289171	0.931989394	0.004851431	0.165677773	0.733181196	0.267235727	1.531813376	5.448066373	5.440472995	0.042027064	4.71953283905201	VRAI	5.43312185372702	VRAI	4.32908720982623	VRAI	3.7164054586527	VRAI	1.9394265711074	FAUX	-0.253305942817171	FAUX	-0.690161349924413	FAUX	4.6524441371467	VRAI	5.10061644905788	VRAI	4.33899982466992	VRAI
2Q3A12	lo.EMS	1	23645	5.427368019	5.427447969	0.00449933	4.922894002	4.925536402	0.019237213	0.906991843	0.905277434	0.000423577	28698	5.434933636	5.437217671	0.004311466	4.698927581	4.733482152	0.083524825	0.864483544	0.870173821	0.002575462	0.106348874	0.588542756	0.344087163	1.514480763	5.526343091	5.50393565	0.052014741	-5.67333059552057	VRAI	-4.89497389944798	VRAI	0.459999893479823	FAUX	0.524156186071195	FAUX	1.7506499044156	FAUX	2.16369888067478	FAUX	1.80745144515142	FAUX	-5.32769325776048	VRAI	-4.65791423989708	VRAI	0.502141073924155	FAUX
2Q3B6	hi.EMS	1	13832	5.42090476	5.419640234	0.004568705	4.910207234	4.912027989	0.017618408	0.905740045	0.903906464	0.000380538	11720	5.432046388	5.432716012	0.004462774	4.993804541	5.025682637	0.078200524	0.919267548	0.922998671	0.002428128	0.095648464	0.602559727	0.306915143	1.284756132	5.52648071	5.499187901	0.045855935	4.17627577534499	VRAI	3.93095915381525	VRAI	0.209535976499151	FAUX	0.27541049499582	FAUX	-0.751376195006513	FAUX	1.45207810443544	FAUX	1.6206007902236	FAUX	4.37205423641117	VRAI	4.26583194907046	VRAI	0.198842859392211	FAUX
2Q3D10	lo.EMS	1	48392	5.428782915	5.429571421	0.004497699	4.944240733	4.948285789	0.019600577	0.910687008	0.909078015	0.000433309	17170	5.440255335	5.444187715	0.004357237	4.95149311	4.98676054	0.097322873	0.910102569	0.91656659	0.003085935	0.074199185	0.517414094	0.272273443	1.286788506	5.557371215	5.54166784	0.046570658	2.52850582506444	FAUX	2.85629228208411	VRAI	1.32779053985387	FAUX	1.33511732329194	FAUX	-0.729240768040536	FAUX	3.26552114702204	VRAI	3.29242556938611	VRAI	2.98025273107462	VRAI	3.07715864905736	VRAI	1.28814534423608	FAUX
2Q3F5	hi.EMS	1	8336	5.422589242	5.420881147	0.004796261	4.964686523	4.964443494	0.01810209	0.915525233	0.913852016	0.000422661	5446	5.423697265	5.421420459	0.004698982	4.995770604	5.020910017	0.077200555	0.921035896	0.924870408	0.002390534	0.14230628	0.601358795	0.326712166	1.324261086	5.516481345	5.488100663	0.05411472	4.49420674889536	VRAI	4.24368745224517	VRAI	0.145627167297126	FAUX	0.21074018103332	FAUX	-0.321111379543735	FAUX	-0.333519204004177	FAUX	1.18425554921767	FAUX	4.43672634459361	VRAI	4.12007705911404	VRAI	0.141879736479496	FAUX
2Q4A4	hi.EMS	1	19213	5.420299173	5.418458736	0.0045536	4.902196358	4.902954249	0.022225461	0.904351724	0.902779745	0.000518482	9316	5.441396948	5.447884866	0.00453404	5.069887563	5.140693411	0.154620202	0.931627402	0.94426168	0.004941183	0.102833834	0.557428081	0.268662072	1.568905491	5.550075828	5.524022675	0.067293702	6.39845173571051	VRAI	7.48356543561129	VRAI	4.48166324439292	VRAI	3.82470976803987	VRAI	2.34341215771507	FAUX	3.8499655628461	VRAI	2.59798897710639	VRAI	6.87474587428449	VRAI	7.77823870011574	VRAI	4.55208132064865	VRAI
2Q4B5	hi.EMS	1	17814	5.414486234	5.409715076	0.004568314	4.898073322	4.895251226	0.020730045	0.904576768	0.902715651	0.00049683	9284	5.455605299	5.464113811	0.003769182	4.972459414	5.026386159	0.108542454	0.911371433	0.920368952	0.003450324	0.068074106	0.516156829	0.270050885	1.44917852	5.557422348	5.542402122	0.046692782	2.75663465876857	VRAI	3.49158783817698	VRAI	1.94724223630323	FAUX	1.87353078365492	FAUX	1.03941613019831	FAUX	6.41543185837092	VRAI	3.32132370039553	VRAI	3.66992294025624	VRAI	4.2873173746212	VRAI	1.92726752855596	FAUX
2Q4D6	hi.EMS	1	20329	5.422118591	5.421766757	0.004634718	4.92010774	4.922491904	0.01864507	0.907357301	0.905945246	0.000403757	18439	5.422669341	5.421125775	0.004658992	4.958235446	4.970142235	0.053738088	0.914303886	0.916988793	0.001608533	0.163186724	0.644774662	0.36122945	1.226812726	5.492448749	5.466021924	0.046782264	3.28385986397744	VRAI	2.92683361656755	VRAI	-1.18375392289795	FAUX	-1.27307760304486	FAUX	-1.38246182770653	FAUX	-0.380102753941059	FAUX	0.315332857194447	FAUX	3.20203661246317	VRAI	2.56963883467085	FAUX	-1.19465708771858	FAUX
2Q4F10	lo.EMS	1	16324	5.422131222	5.420783916	0.004669526	4.936117472	4.936908148	0.021616669	0.91031248	0.908643819	0.000510634	21978	5.426517345	5.425645062	0.004481086	4.668070507	4.694008182	0.067975845	0.860150937	0.864531984	0.002068451	0.133770134	0.691191191	0.359268075	1.399278865	5.47920735	5.459606566	0.040191059	-6.45228924026762	VRAI	-5.83760744520198	VRAI	-0.401905444135983	FAUX	-0.365601401994724	FAUX	0.495938321054895	FAUX	0.334304650748733	FAUX	0.0628523987926979	FAUX	-6.34271262790378	VRAI	-5.86344163438759	VRAI	-0.383604843106627	FAUX
2Q4H10	lo.EMS	1	24780	5.425159739	5.425583125	0.004559593	4.950159786	4.952685914	0.02145622	0.912387627	0.910438114	0.000498155	20643	5.441235015	5.444717587	0.00423137	4.963670783	5.015087188	0.124586813	0.912132883	0.921279084	0.003941832	0.060940755	0.506854624	0.295810356	1.605125265	5.563569113	5.546508116	0.047879804	2.89353561933171	VRAI	3.64365195386558	VRAI	2.78279288250394	VRAI	2.55654821785643	FAUX	2.7378967172013	VRAI	3.34928313875616	VRAI	3.48291768272898	VRAI	3.38082778165366	VRAI	3.94224898980825	VRAI	2.84123265524762	VRAI
2Q4H2	hi.sham	1	22781	5.423815329	5.423607089	0.004609367	4.943754314	4.942729623	0.020268454	0.911425893	0.909382146	0.000444108	24308	5.416518253	5.411896523	0.004704584	5.083148808	5.132137968	0.116163317	0.938377729	0.946126594	0.003703542	0.190965937	0.678295211	0.283751449	1.409976885	5.469179051	5.442597342	0.055035829	7.61209183081247	VRAI	7.79515375274031	VRAI	2.37770616268826	FAUX	2.23108226387103	FAUX	0.612454887587718	FAUX	-1.83905987893624	FAUX	-0.606556334527876	FAUX	7.31096418024622	VRAI	7.51695712877893	VRAI	2.36138914209595	FAUX
2Q4H5	hi.EMS	1	12683	5.416476489	5.411660103	0.004653581	4.953681709	4.945591667	0.01937618	0.914515666	0.911617878	0.00045021	12746	5.411499739	5.405900189	0.004542456	4.941545277	4.966702431	0.07433957	0.913113597	0.916999594	0.002339258	0.23709399	0.778911031	0.294118702	1.189836557	5.418741307	5.402899026	0.046573882	3.06985801559902	VRAI	2.92863823887898	VRAI	0.058459318687158	FAUX	0.121708236619895	FAUX	-1.78518459840778	FAUX	-2.78695838827935	VRAI	-2.16890858695987	FAUX	2.65302652725663	VRAI	2.46458788707987	FAUX	-0.021095955973406	FAUX
3Q1H5	hi.EMS	1	18113	5.424132792	5.422809722	0.004716538	4.954856242	4.960646743	0.045173988	0.913427859	0.913476027	0.001307756	5548	5.421280538	5.419524543	0.004673825	4.958973064	4.99418953	0.097607941	0.914677043	0.920824476	0.003117558	0.18961788	0.692682048	0.264536386	1.208903848	5.464930417	5.444672349	0.048613528	3.66993801773434	VRAI	3.82636852485415	VRAI	0.642555743702587	FAUX	0.718062316302397	FAUX	-1.33712802649034	FAUX	-0.195028839269909	FAUX	0.302800536557255	FAUX	3.39262809553663	VRAI	3.46420244114045	VRAI	0.592730262903907	FAUX
3Q2B4	hi.EMS	1	22667	5.41742991	5.413712902	0.004660445	4.892117482	4.891331132	0.033447747	0.902986909	0.902621492	0.000926886	6490	5.434824424	5.438496465	0.004314612	4.963753393	5.006213522	0.10372213	0.913212783	0.920216572	0.003224265	0.130508475	0.673035439	0.340627615	1.670108497	5.483830262	5.475350069	0.044726694	3.39528808623195	VRAI	3.71855009975356	VRAI	0.788703298072524	FAUX	0.859681504929563	FAUX	3.13080235055232	VRAI	2.04806733677319	FAUX	1.64167065186877	FAUX	3.54738411930689	VRAI	3.8369113932298	VRAI	0.873489730408073	FAUX
3Q2D11	lo.EMS	1	27422	5.42174701	5.419753414	0.004655555	4.918263431	4.932062614	0.056398987	0.907086672	0.909012906	0.001699679	5568	5.429329235	5.431825158	0.004581719	4.470092455	4.476092206	0.066016576	0.823220121	0.823765071	0.001965245	0.154094828	0.713541667	0.391453096	1.485908334	5.459821351	5.456860028	0.034509112	-13.4845546015536	VRAI	-13.3881788186412	VRAI	-0.93566992864023	FAUX	-1.00137055555047	FAUX	1.34635914186318	FAUX	1.25930259164562	FAUX	0.834708357220264	FAUX	-12.4341526861268	VRAI	-12.5953151224383	VRAI	-0.85792407819182	FAUX
3Q2E5	hi.EMS	1	20391	5.419913732	5.417479997	0.004756957	4.931829656	4.936287489	0.032912954	0.909895846	0.909391264	0.000893883	5125	5.42122905	5.417838571	0.004488234	4.921720287	4.962132469	0.10715902	0.907790105	0.915327199	0.003413922	0.171707317	0.680390244	0.280214312	1.369200176	5.473387468	5.449558617	0.056115091	2.37816124997374	FAUX	2.8513663066064	VRAI	1.04846045289029	FAUX	1.10572355746659	FAUX	0.215746244730619	FAUX	-0.394365382299925	FAUX	0.51605231017677	FAUX	2.18662498509787	FAUX	2.47052632988107	FAUX	1.03130941937588	FAUX
3Q2F10	lo.EMS	1	23967	5.424706181	5.42403917	0.004682862	4.94156355	4.945835266	0.041230008	0.910885572	0.910912068	0.001178348	6062	5.419337284	5.415238855	0.004837523	4.924527263	4.9663905	0.108377123	0.90866147	0.917810973	0.003499277	0.25404157	0.764599142	0.235994543	1.117015619	5.417727581	5.411796412	0.044285471	2.54160239947148	FAUX	3.29189079893708	VRAI	1.16536397846261	FAUX	1.21422077300549	FAUX	-2.2272973049916	FAUX	-0.701736086143077	FAUX	-1.13200653392139	FAUX	2.27749664781785	FAUX	2.60251296726189	VRAI	1.08724389402906	FAUX
3Q2H1	hi.sham	1	25566	5.421081471	5.418763519	0.004714018	4.935000181	4.943068916	0.049504581	0.910279751	0.91104885	0.001455482	5032	5.417389376	5.415030972	0.004503828	4.987352307	5.053644949	0.183208739	0.920509518	0.933502735	0.00595552	0.223966614	0.76927663	0.256387182	1.635228756	5.419834951	5.4164566	0.044038943	4.76393010878331	VRAI	6.07499646347171	VRAI	4.52947230676606	VRAI	3.90715828761063	VRAI	2.79290407763773	VRAI	-0.726314595498325	FAUX	-0.928621587291291	FAUX	4.31136377341366	VRAI	5.30714835390573	VRAI	4.5234616263622	VRAI
1Q3F10	lo.EMS	1	37911	5.413418644	5.409029798	0.004490873	4.858542959	4.860170247	0.020372575	0.897472915	0.896390965	0.000525894	8664	5.481117473	5.491170421	0.002641692	4.715425814	4.787031636	0.12652224	0.860234533	0.872985278	0.00407362	0.049515235	0.398314866	0.236088873	1.633871328	5.57625186	5.581967284	0.03791946	-9.6178108115994	VRAI	-8.33840714989498	VRAI	1.4770257489881	FAUX	1.46681368133677	FAUX	5.45633538133431	VRAI	14.4019332596325	VRAI	9.7562284602249	VRAI	-6.97738534068332	VRAI	-5.75606110249136	VRAI	1.50880557159354	FAUX
3Q3F6	hi.EMS	1	22768	5.417028824	5.413390303	0.004768225	4.947322831	4.947134613	0.030680891	0.913244719	0.912014109	0.000827801	8002	5.447978118	5.455224131	0.004062188	4.963688544	5.00437297	0.102896304	0.91100895	0.916983108	0.00321381	0.085103724	0.629092727	0.321935028	1.620272678	5.511167174	5.502418925	0.042000087	2.98191711216132	VRAI	3.14505988402963	VRAI	0.774383968685158	FAUX	0.84591045529208	FAUX	2.64801673670891	VRAI	4.02581970359846	VRAI	2.82303883549097	VRAI	3.54528472962357	VRAI	3.77985960816657	VRAI	0.835568353098491	FAUX
3Q4A6	hi.EMS	1	18955	5.415504752	5.410855652	0.004819681	4.915592817	4.913018683	0.037767977	0.907641215	0.90641535	0.001066654	6972	5.434351694	5.436170601	0.004375096	4.965795356	4.994534893	0.074317509	0.913724769	0.917572383	0.002308503	0.141566265	0.697504303	0.310216089	1.278545208	5.473856114	5.465978111	0.043886085	3.4913208398619	VRAI	3.24957425217187	VRAI	-0.465538473178866	FAUX	-0.445993231961206	FAUX	-0.662475790184366	FAUX	1.77307481654267	FAUX	1.23264956137851	FAUX	3.61348962680774	VRAI	3.47490769458876	VRAI	-0.476750789491101	FAUX
3Q4F3	hi.sham	1	19595	5.422734703	5.421459961	0.004722493	4.966796324	4.972151904	0.035936037	0.915885502	0.915457993	0.001019898	6804	5.468579666	5.481831599	0.003616625	4.988922892	5.031365991	0.114727149	0.912231192	0.919379645	0.003672791	0.04776602	0.37345679	0.245230448	1.381197462	5.592469655	5.592444357	0.039427277	3.21117194503207	VRAI	3.5701119400044	VRAI	1.40301143129087	FAUX	1.43077416103502	FAUX	0.331970221825586	FAUX	7.17168493143303	VRAI	6.75202575247206	VRAI	4.36220912100233	VRAI	4.61656513580128	VRAI	1.37883283876034	FAUX
3Q4H4	hi.EMS	1	22578	5.418031363	5.414338982	0.004684695	4.950267732	4.952872322	0.042817247	0.913601555	0.913656435	0.001211262	7176	5.432554394	5.434754078	0.004480265	5.011467381	5.072881941	0.148697332	0.922380473	0.933058188	0.004755936	0.150641026	0.687012263	0.283475092	1.633106934	5.471498076	5.466093946	0.047006853	5.11486345572582	VRAI	5.99615118950872	VRAI	2.88650354313007	VRAI	2.68025204645544	VRAI	2.7723488794431	VRAI	1.60559587979729	FAUX	1.23770495727518	FAUX	5.09205333791138	VRAI	5.90343943008669	VRAI	2.93872091060422	VRAI
3Q4H5	hi.EMS	1	20773	5.423019634	5.421562799	0.004684063	4.964563008	4.964641415	0.03490653	0.915412528	0.914395379	0.000968851	6413	5.407214583	5.400527627	0.004939607	5.062543616	5.077631309	0.062818515	0.936206203	0.938862574	0.001911062	0.332449712	0.776235771	0.347346502	1.238684058	5.393846088	5.371791699	0.050869731	7.70814319939867	VRAI	7.02562254879556	VRAI	-1.00987980182968	FAUX	-1.09334887100765	FAUX	-1.04863157446583	FAUX	-2.44108011632085	FAUX	-2.87793532873777	VRAI	6.74557028993622	VRAI	6.05065609243697	VRAI	-1.00477689929464	FAUX
3Q4H6	hi.EMS	1	32085	5.422779739	5.421732222	0.004622232	4.942030454	4.952705285	0.053029403	0.91128451	0.912235219	0.001570061	5386	5.420063045	5.415823557	0.004737014	5.082453435	5.116149273	0.084901744	0.937654263	0.943094032	0.00264098	0.19550687	0.637393242	0.304805417	1.290412733	5.480492076	5.46168457	0.068671905	7.97975451146847	VRAI	7.77611791885282	VRAI	-0.0101728417371285	FAUX	0.0537511781315363	FAUX	-0.547508875686041	FAUX	-0.632605355986938	FAUX	1.0452662182303	FAUX	7.39012099396218	VRAI	7.24460149751167	VRAI	0.00927019915333796	FAUX
4Q1B4	hi.EMS	1	19061	5.421088109	5.419508839	0.004722886	4.909892126	4.907328041	0.017674525	0.90565897	0.903200906	0.000392489	10372	5.427052922	5.428594773	0.004511002	4.909782282	4.940053057	0.07319526	0.90462054	0.908716712	0.002257969	0.153297339	0.667855766	0.331508679	1.335364678	5.485014448	5.465336742	0.048895103	2.12279271994352	FAUX	2.74037678478235	VRAI	0.0446561289076673	FAUX	0.103499101455791	FAUX	0.88864476288635	FAUX	2.1791638127517	FAUX	1.47734953792352	FAUX	2.24123516824983	FAUX	2.88013019373076	VRAI	0.0644184339886558	FAUX
4Q1B6	hi.EMS	1	24562	5.422370297	5.422788395	0.004701216	4.917010881	4.916611843	0.018327527	0.906758861	0.904633438	0.000416398	9563	5.4246929	5.423977003	0.004713521	5.036965117	5.068111606	0.086245374	0.928471641	0.933720325	0.002696474	0.152148907	0.63233295	0.295744152	1.265060593	5.498133962	5.474859942	0.05303356	7.75163561664194	VRAI	9.7134203966561	VRAI	0.865166364815952	FAUX	0.922960185236795	FAUX	-0.223449522898614	FAUX	0.954491279720447	FAUX	2.16106500870701	FAUX	7.58734304299166	VRAI	9.14259052244818	VRAI	0.889753542629325	FAUX
4Q1D4	hi.EMS	1	18328	5.422671258	5.422052795	0.004601282	4.950598872	4.948373838	0.018078546	0.912902591	0.910526278	0.000409522	9817	5.440414452	5.445815068	0.004625784	4.928273765	4.955733437	0.076958246	0.905788942	0.909096796	0.002344746	0.116430681	0.58296832	0.338910575	1.382356406	5.528112844	5.51401751	0.051796079	2.39853476213219	FAUX	2.84637515822444	VRAI	0.207029230107	FAUX	0.271588985254226	FAUX	1.63197613812523	FAUX	6.74613494756212	VRAI	4.97237161151446	VRAI	3.01852137107708	VRAI	3.64694942177944	VRAI	0.302402903635688	FAUX
4Q1E11	lo.EMS	1	16816	5.421329236	5.420041608	0.004703901	4.945396098	4.948652544	0.019611867	0.912187718	0.910824208	0.000491326	8813	5.426611728	5.427093183	0.004509536	4.634938174	4.654566365	0.074452913	0.854062936	0.855989251	0.002344973	0.136729831	0.642800408	0.29035116	1.179773105	5.495696335	5.473355567	0.043180596	-9.80876591751694	VRAI	-11.964333494343	VRAI	0.207453981987939	FAUX	0.272024574485906	FAUX	-1.572556449669	FAUX	1.78092916077153	FAUX	2.05305882786861	FAUX	-9.31178808449642	VRAI	-11.0810547251048	VRAI	0.143956833069864	FAUX
4Q1E4	hi.EMS	1	18442	5.423410743	5.423065561	0.00468284	4.943406643	4.944364212	0.018815864	0.911455613	0.909583034	0.000439058	8357	5.416981481	5.41165842	0.004752588	4.983074064	4.996638615	0.054877683	0.919867326	0.923026339	0.001679791	0.222208927	0.718439631	0.327731689	1.113656471	5.446340828	5.425535851	0.045558471	5.7210233875165	VRAI	6.73106617597737	VRAI	-1.03720375222705	FAUX	-1.1105648516199	FAUX	-2.61841219001091	VRAI	-2.3125034484632	FAUX	-1.38014425908444	FAUX	5.32204220407398	VRAI	5.64733952821524	VRAI	-1.09404956125865	FAUX
4Q1G4	hi.EMS	1	39213	5.42453037	5.425274936	0.004657251	4.953737641	4.9561348	0.018309653	0.913169648	0.911396943	0.000415981	5719	5.464075333	5.475498308	0.003701998	4.981358939	5.052054917	0.155914249	0.911559119	0.923941341	0.004993911	0.070466865	0.471061374	0.260221298	1.688758857	5.569031708	5.560399264	0.054257956	3.76029243609207	VRAI	6.98624325182445	VRAI	5.16402401719032	VRAI	4.40561036941141	VRAI	6.47875587941065	VRAI	14.6183868612287	VRAI	8.30233662032166	VRAI	5.24994722939701	VRAI	8.35736861685675	VRAI	5.29585823389855	VRAI
4Q2A11	lo.EMS	1	17755	5.417981933	5.416447445	0.004762451	4.889343108	4.895555135	0.032626296	0.902407362	0.90206997	0.000933528	7562	5.433270697	5.435481241	0.004348157	3.074121078	3.118925753	0.114634194	0.565740793	0.573758341	0.00378802	0.139381116	0.655646654	0.182951484	0.939378112	5.484821592	5.477469997	0.053776411	-77.8525868961132	VRAI	-90.6732962370001	VRAI	2.9076166583468	VRAI	2.71061449082403	VRAI	-5.3752074342685	VRAI	4.00551467240849	VRAI	2.34845317477469	FAUX	-74.9204574301455	VRAI	-86.178644748691	VRAI	2.68516236732468	VRAI
4Q2A12	lo.EMS	1	34639	5.420123294	5.418234982	0.004724337	4.905137421	4.904228516	0.018022113	0.904944371	0.903162619	0.000406027	9274	5.420588307	5.418511757	0.004578266	4.903788955	4.96929474	0.151928806	0.904621361	0.918237585	0.004980139	0.209294803	0.747681691	0.200040326	1.152357215	5.431967643	5.427394404	0.044776857	2.12298647536043	FAUX	5.39557156211757	VRAI	5.13825448897758	VRAI	4.38748920772988	VRAI	-2.0062304617653	FAUX	-0.494939216484099	FAUX	-1.24670996815587	FAUX	1.98930673254068	FAUX	4.31013921040662	VRAI	5.04380480115565	VRAI
4Q2B4	hi.EMS	1	43194	5.424161834	5.423898464	0.004697006	4.903419515	4.903060128	0.01678572	0.903951697	0.902139741	0.000361092	5092	5.442433383	5.450321485	0.004612994	5.121693832	5.187546101	0.144415654	0.941035393	0.953154585	0.004713673	0.139041634	0.575216025	0.203934771	1.141056056	5.507103646	5.51433188	0.050471888	10.7166721657338	VRAI	15.1332748210744	VRAI	4.63965565767226	VRAI	4.03180856884899	VRAI	-2.18499609603317	FAUX	7.94127570214382	VRAI	4.994941717419	VRAI	11.1488995256589	VRAI	14.9833078557196	VRAI	4.56864664375152	VRAI
4Q2B6	hi.EMS	1	37085	5.422549758	5.421628602	0.004657709	4.902485624	4.903008549	0.018395328	0.904046128	0.902254117	0.000414526	5806	5.411977571	5.407038907	0.004965029	5.118325299	5.154192612	0.09704649	0.945707156	0.951753127	0.003104924	0.284533241	0.773854633	0.258502554	1.142862197	5.408851203	5.39157019	0.044767707	11.8192049157988	VRAI	14.7424341951933	VRAI	1.62943907745717	FAUX	1.62808639120812	FAUX	-2.15642593420798	FAUX	-3.53763824016595	VRAI	-3.81869935622475	VRAI	11.0073038394358	VRAI	13.3522187693767	VRAI	1.57285410767423	FAUX
1Q3F12	lo.EMS	1	35000	5.412880407	5.408799438	0.004403907	4.857867321	4.859978442	0.024715285	0.897432587	0.896488657	0.000669101	12719	5.417887952	5.414878127	0.004138098	4.769550831	4.831063118	0.125096428	0.880265626	0.890661463	0.004055121	0.131771366	0.806431323	0.248054735	1.363859318	5.429708049	5.423393345	0.035498962	-4.585820065951	VRAI	-3.67142855112134	VRAI	1.45013299852538	FAUX	1.44278793911884	FAUX	1.60227511748207	FAUX	-1.60303284960921	FAUX	-2.29879616195357	FAUX	-4.59580244975168	VRAI	-3.72415522955285	VRAI	1.43874864684924	FAUX
4Q2E5	hi.EMS	1	24548	5.420337651	5.418829748	0.004771018	4.921860372	4.921530414	0.016710275	0.907991735	0.905840661	0.000355941	9903	5.43419261	5.436146738	0.004331936	5.017295051	5.044263339	0.084075114	0.923199743	0.927305553	0.002590279	0.104412804	0.612541654	0.337475472	1.486739609	5.51418244	5.495182043	0.042323467	6.50747143279907	VRAI	7.92445954062993	VRAI	0.666459201836556	FAUX	0.731024311230669	FAUX	3.2831456766838	VRAI	4.182010231242	VRAI	3.62008454547238	VRAI	6.76051531313884	VRAI	7.97633628044387	VRAI	0.752498667087357	FAUX
4Q2E6	hi.EMS	1	19325	5.417559473	5.414023544	0.004812776	4.931272584	4.929347389	0.02046883	0.910193107	0.908356156	0.000478946	11826	5.424758767	5.425168894	0.004676733	4.979985643	5.000872056	0.066002156	0.917950033	0.920379087	0.002003158	0.157957044	0.689413157	0.345816072	1.299130997	5.474865858	5.458102013	0.046071258	5.26854360119806	VRAI	5.99279672477367	VRAI	-0.432134406484234	FAUX	-0.409687143412112	FAUX	0.315487888814876	FAUX	1.27059107898859	FAUX	0.95793420019824	FAUX	5.19222097600795	VRAI	5.85436792673682	VRAI	-0.390498762236881	FAUX
4Q2F11	lo.EMS	1	24301	5.420870912	5.420036655	0.004686721	4.936980295	4.938059169	0.017144582	0.91069561	0.908704638	0.000379269	10777	5.42637295	5.425701287	0.004573507	4.923654541	4.948339598	0.078612505	0.907308893	0.911564006	0.00246717	0.167393523	0.696297671	0.292834035	1.214067078	5.465563773	5.454279147	0.041244672	2.75724211864706	VRAI	3.53443423711239	VRAI	0.436103345843048	FAUX	0.503524568418461	FAUX	-1.03008254633658	FAUX	1.41178630609571	FAUX	0.68347260882851	FAUX	2.82435311085867	VRAI	3.28536775639272	VRAI	0.407024061081884	FAUX
4Q2F5	hi.EMS	1	29704	5.422228518	5.421533184	0.00473024	4.934521623	4.935728891	0.017964704	0.910010132	0.908070703	0.000399356	8087	5.4134455	5.407535362	0.004715811	4.953753342	4.973769581	0.061812308	0.91504227	0.920709703	0.001899773	0.316681093	0.791640905	0.323267496	1.170364943	5.39083379	5.383159841	0.045111188	4.58231359832179	VRAI	6.08499939111565	VRAI	-0.625583627677557	FAUX	-0.62716992807073	FAUX	-1.72137800392064	FAUX	-3.40597408140827	VRAI	-4.42251800184684	VRAI	4.08955086373455	VRAI	4.52897281783583	VRAI	-0.655479486103959	FAUX
4Q3B4	hi.EMS	1	27826	5.422078212	5.422125096	0.004684261	4.885290681	4.885095359	0.016974304	0.900954803	0.899155332	0.000368003	10204	5.432345217	5.434616784	0.00454149	5.014404137	5.070560538	0.12774252	0.922995827	0.932931853	0.004091271	0.121912975	0.622108977	0.257978206	1.368206277	5.505089909	5.489130563	0.048054796	6.45934740162236	VRAI	9.4935301894792	VRAI	3.47504587705451	VRAI	3.15963255910382	VRAI	1.40814451292138	FAUX	3.77625320120355	VRAI	3.18562023755732	VRAI	6.63899625673	VRAI	9.26235089469573	VRAI	3.51417900758601	VRAI
4Q3C6	hi.EMS	1	25292	5.419332922	5.416751978	0.0046577	4.891156248	4.889413764	0.018186479	0.902493556	0.900663101	0.000409763	9469	5.41258633	5.406159364	0.004856228	5.044332836	5.057384593	0.061227509	0.931919463	0.936498755	0.001859177	0.322737353	0.783609674	0.337837936	1.199588188	5.394199712	5.380630857	0.045029312	8.56531915996265	VRAI	10.4882729574656	VRAI	-0.701544981680209	FAUX	-0.714182296421691	FAUX	-1.25911462652807	FAUX	-3.77090064901693	VRAI	-4.60408569822665	VRAI	7.89704380225514	VRAI	8.61800630778448	VRAI	-0.692464231692999	FAUX
4Q3E6	hi.EMS	1	15909	5.418777428	5.417974615	0.004855722	4.928428558	4.925017992	0.02007074	0.909465919	0.906738952	0.000467887	12519	5.418863652	5.416924952	0.00456198	4.960219768	4.976666298	0.066089694	0.915310807	0.916562645	0.002034591	0.209841042	0.729770748	0.326529115	1.242831087	5.447159857	5.42965863	0.048711456	4.64568813960399	VRAI	4.92846188211764	VRAI	-0.373318433472968	FAUX	-0.34468253421882	FAUX	-0.575083522522147	FAUX	-0.91577362330323	FAUX	-1.08415049806706	FAUX	4.36136593186097	VRAI	4.67063126576982	VRAI	-0.38496255123212	FAUX
4Q3G12	lo.EMS	1	19823	5.421802562	5.420795453	0.004783592	4.927741667	4.929418926	0.020448162	0.908834356	0.907325369	0.000490634	11847	5.430678946	5.434076051	0.004596736	4.90989407	4.947024233	0.080401778	0.904047578	0.908793333	0.002507582	0.139782223	0.656199882	0.301244635	1.259874743	5.488917908	5.474035513	0.042757022	1.98757409486712	FAUX	2.76174495963712	VRAI	0.511720407572163	FAUX	0.578817272950545	FAUX	-0.305481088375046	FAUX	3.63284613398196	VRAI	2.10187536007389	FAUX	2.24593415697029	FAUX	3.22104232716829	VRAI	0.520183978753317	FAUX
4Q3G4	hi.EMS	1	20644	5.418116995	5.416670458	0.004777416	4.925707994	4.925745138	0.017536086	0.909076809	0.907544931	0.000388717	13213	5.428244171	5.42833083	0.004444923	4.938913629	4.968254066	0.078160209	0.909782543	0.913951624	0.002412542	0.136910618	0.687656096	0.330848166	1.387360937	5.479257418	5.461964985	0.041507822	3.34102176183496	VRAI	4.20029658438574	VRAI	0.333885963675918	FAUX	0.400758510483587	FAUX	1.71113953706761	FAUX	2.10916384688374	FAUX	1.23527519057993	FAUX	3.46576616410738	VRAI	4.25924702327021	VRAI	0.378419271246505	FAUX
4Q3H4	hi.EMS	1	22596	5.422467014	5.421799644	0.004703328	4.932673196	4.933087229	0.017730466	0.909630941	0.907584426	0.000395182	12322	5.432041379	5.435717784	0.004456528	4.935935031	4.970107343	0.093135864	0.908609937	0.914076711	0.00292729	0.115971433	0.628712871	0.286050162	1.307682612	5.507602655	5.48776249	0.043685025	3.06428757863201	VRAI	4.23518102713722	VRAI	1.29705856812357	FAUX	1.32750678982646	FAUX	0.450760286937019	FAUX	4.06824792135367	VRAI	3.0873998205482	VRAI	3.3405613263359	VRAI	4.34987801808666	VRAI	1.32553236515436	FAUX
4Q3H5	hi.EMS	1	22252	5.421668322	5.420421168	0.004769944	4.930940379	4.934589341	0.018452404	0.909449828	0.907642634	0.000425389	12620	5.424135629	5.423291759	0.004506831	4.905884999	4.93358345	0.083512659	0.904396698	0.908481212	0.002626887	0.15451664	0.690570523	0.298011102	1.282841409	5.471369719	5.45498046	0.043706727	2.06996616691844	FAUX	2.67470020553772	VRAI	0.734958395041036	FAUX	0.79762612189785	FAUX	0.0578135625991036	FAUX	0.772758645738028	FAUX	0.73382317880092	FAUX	2.07741356971104	FAUX	2.56374634043651	FAUX	0.716927034645641	FAUX
4Q4A1	hi.sham	1	20158	5.419774807	5.419049886	0.004723177	4.885494012	4.886064682	0.018427657	0.901375646	0.899803538	0.000419854	12331	5.421634979	5.419930978	0.004446838	4.793781178	4.82577327	0.08311081	0.884134937	0.888758107	0.002609593	0.170140297	0.722082556	0.296063287	1.279934235	5.457690884	5.439561625	0.044218304	-2.71179503896682	VRAI	-2.82570772857025	VRAI	0.702598663635925	FAUX	0.766220961892442	FAUX	0.0118268806988616	FAUX	-0.118549535534002	FAUX	-0.373167751869207	FAUX	-2.6348506303813	VRAI	-2.70850592662521	VRAI	0.691512690520207	FAUX
4Q4A4	hi.EMS	1	31826	5.423325967	5.42290158	0.004656717	4.896718571	4.896906334	0.017195345	0.902856559	0.901282841	0.000378808	8016	5.418265575	5.414046979	0.004858878	4.991357369	5.041102392	0.103984947	0.921224026	0.930635115	0.003442599	0.296032934	0.700224551	0.180247224	0.83384599	5.437939326	5.415359865	0.062505891	6.04120362397396	VRAI	8.8530125875211	VRAI	2.26128088977478	FAUX	2.17665331121087	FAUX	-7.04455097018055	VRAI	-1.67903694822082	FAUX	-2.11072631749717	FAUX	5.67022945819037	VRAI	7.82175616577558	VRAI	2.01166653198667	FAUX
4Q4C11	lo.EMS	1	20303	5.419088885	5.416722866	0.004689213	4.913028916	4.912346958	0.016105433	0.906570798	0.905078948	0.000337109	11841	5.421262292	5.419160741	0.004623318	4.91766897	4.947575849	0.082418931	0.907045088	0.911397619	0.002578363	0.208850604	0.746389663	0.30932109	1.306008929	5.439807736	5.427632148	0.043402595	2.69498432600416	VRAI	3.48803199086708	VRAI	0.644162534817747	FAUX	0.70924384132995	FAUX	0.424285391480868	FAUX	-0.322823048035623	FAUX	-1.22964120441199	FAUX	2.57275069723165	FAUX	3.24801806087495	VRAI	0.647755829114154	FAUX
4Q4D4	hi.EMS	1	43990	5.423477812	5.422703076	0.004679322	4.92084605	4.921608452	0.017846507	0.907275268	0.905627133	0.000391759	5045	5.458205551	5.46943833	0.003836182	5.019982642	5.073186608	0.129212462	0.919589834	0.928373876	0.004053664	0.075916749	0.480277502	0.32230697	1.870562772	5.558862882	5.55828967	0.049919407	5.65553547259424	VRAI	8.22239499782038	VRAI	3.40467740134317	VRAI	3.1048741623332	VRAI	9.35459296632865	VRAI	13.011228296083	VRAI	8.1508789112667	VRAI	6.87348772336377	VRAI	9.39077386468768	VRAI	3.60714330968065	VRAI
4Q4E4	hi.EMS	1	21680	5.419225258	5.417780489	0.004654062	4.937010894	4.934114486	0.020351014	0.91097147	0.908828282	0.000479088	10990	5.454112811	5.463160339	0.003979964	5.123793845	5.165939885	0.107278238	0.939348062	0.94545715	0.003360724	0.062875341	0.538216561	0.307801194	1.598035988	5.552250583	5.53406674	0.043836123	10.3184632480939	VRAI	12.9866030598948	VRAI	2.10808018381933	FAUX	2.0462095481585	FAUX	5.04367021966672	VRAI	11.3462507982178	VRAI	6.41180045143128	VRAI	11.2371731990391	VRAI	13.9266968632454	VRAI	2.21994583784333	FAUX
4Q4H11	lo.EMS	1	22698	5.421638539	5.420776499	0.00473618	4.929146567	4.93125695	0.019529381	0.909123932	0.907531255	0.0004639	10424	5.433194889	5.43676116	0.004600422	4.784553369	4.837985935	0.119163453	0.880516053	0.888149931	0.003771775	0.145817345	0.643323101	0.297689803	1.515083854	5.489774224	5.480601175	0.048506996	-3.56584909279752	VRAI	-2.99531672754553	VRAI	2.87721976713158	VRAI	2.68606233424086	VRAI	3.731504728642	VRAI	4.34496025843911	VRAI	2.57325522034519	FAUX	-3.02273994234317	VRAI	-2.11126872014699	FAUX	2.97160863659304	VRAI
4Q4H5	hi.EMS	1	22570	5.418559456	5.417219181	0.004606635	4.926335634	4.92384995	0.019312941	0.909112188	0.907305067	0.000442599	10653	5.438060341	5.43972575	0.004123667	5.088054615	5.132275703	0.109784933	0.935559222	0.942476616	0.003466896	0.090960293	0.667417629	0.289671479	1.494635584	5.497928222	5.482833581	0.039792168	9.42429969896772	VRAI	12.1553874444287	VRAI	2.30674431026454	FAUX	2.2150642445184	FAUX	3.40804693495636	VRAI	5.13119516071864	VRAI	2.73353018246611	VRAI	9.73488101519053	VRAI	12.2804139253236	VRAI	2.37847804607952	FAUX
6Q1C5	hi.EMS	1	19651	5.423773321	5.422207243	0.004566455	4.928784704	4.927998762	0.022414759	0.908690939	0.907431764	0.000551968	6655	5.417523579	5.411624755	0.00468552	4.898226335	4.929058566	0.087807749	0.904101402	0.909875823	0.002789649	0.225244177	0.72231405	0.272146764	1.178123194	5.444102431	5.424020358	0.048947844	1.88763605109216	FAUX	2.59726031323404	VRAI	0.373003008172719	FAUX	0.44153767646387	FAUX	-1.8310241888762	FAUX	-2.8059581846143	VRAI	-2.16436676304307	FAUX	1.49871559706172	FAUX	1.78640771767622	FAUX	0.321535898842992	FAUX
6Q1C6	hi.EMS	1	18786	5.426357622	5.426870585	0.004556889	4.935899882	4.939474323	0.022775649	0.909562007	0.90825725	0.000552099	5894	5.441771874	5.44653406	0.004174329	4.960174275	5.00287634	0.105845758	0.911418144	0.918028643	0.003345449	0.085341025	0.555310485	0.295537266	1.488180557	5.541836578	5.523361409	0.045284308	3.81875703130469	VRAI	5.03188794325138	VRAI	1.32592249574802	FAUX	1.3701391982319	FAUX	2.46142987015841	FAUX	5.7221898465333	VRAI	4.93504207881077	VRAI	4.35310834934628	VRAI	5.56968520703635	VRAI	1.36487771776829	FAUX
6Q1D6	hi.EMS	1	17894	5.423770227	5.423718424	0.004517675	4.944513637	4.945180436	0.021419101	0.911593498	0.910202557	0.00052138	7088	5.429751077	5.428769567	0.004623614	4.942144664	4.965916311	0.076127978	0.910125657	0.91281424	0.002341352	0.12739842	0.638826185	0.336750937	1.366438701	5.504321	5.481313611	0.046545993	3.47762859431021	VRAI	3.47474211912607	VRAI	-0.395602510937651	FAUX	-0.377407930766078	FAUX	0.776027792022286	FAUX	1.38242352914919	FAUX	1.93009592717722	FAUX	3.52235286393529	VRAI	3.67542535409364	VRAI	-0.354037193496136	FAUX
6Q1E12	lo.EMS	1	18446	5.421478577	5.420143132	0.004621256	4.961856388	4.960960436	0.02048396	0.915193078	0.913604421	0.000511183	8597	5.422921034	5.420431066	0.004471118	4.759128311	4.788288599	0.07448809	0.877529146	0.882602694	0.002315088	0.166802373	0.678259858	0.321198972	1.3110206	5.472733166	5.452332413	0.050175121	-5.12562764649049	VRAI	-5.54715026131904	VRAI	-0.440632157252293	FAUX	-0.427724413224202	FAUX	0.00881604036509183	FAUX	-0.654625644011684	FAUX	-0.141045572309433	FAUX	-4.91054339625926	VRAI	-5.42827539277719	VRAI	-0.4488904408115	FAUX
6Q1F10	lo.EMS	1	17747	5.42419128	5.424636665	0.004682354	4.965434405	4.973123233	0.038085278	0.915399869	0.915625655	0.001123584	6453	5.42243772	5.421521666	0.004851007	2.662457663	2.744292983	0.159750114	0.490993209	0.505989319	0.005386734	0.221137455	0.720595072	0.100752676	0.57817753	5.442231626	5.434244659	0.046155241	-107.144758230405	VRAI	-118.012938615421	VRAI	4.82570705169466	VRAI	4.24585654767829	VRAI	-10.136710516464	VRAI	-0.388198161632049	FAUX	-1.43368702701757	FAUX	-101.519429851225	VRAI	-110.186278558296	VRAI	4.48277553215774	VRAI
6Q1F12	lo.EMS	1	20505	5.421615505	5.419919418	0.004597976	4.958753606	4.969042967	0.045635139	0.914593976	0.915033107	0.001362297	8448	5.430131293	5.431569603	0.00448889	3.249879586	3.307067951	0.083866969	0.598396036	0.609070374	0.002687355	0.138612689	0.657907197	0.28139921	1.216322859	5.483417693	5.47226338	0.050120728	-78.7977353951266	VRAI	-87.2304627807603	VRAI	0.197619873840176	FAUX	0.260831809505577	FAUX	-1.30218557173615	FAUX	2.06645666875315	FAUX	1.28332111117272	FAUX	-74.4526237630114	VRAI	-81.343172722976	VRAI	0.0935960761505613	FAUX
6Q1F5	hi.EMS	1	16825	5.422426547	5.421523312	0.004572187	4.97163626	4.971442853	0.026124359	0.916813666	0.914913136	0.00066442	7275	5.429544489	5.43124953	0.004474957	5.027215714	5.054055466	0.082827449	0.925835432	0.929694785	0.002575585	0.127010309	0.666116838	0.313978339	1.350804232	5.490831666	5.470958526	0.047000786	7.62393798951892	VRAI	8.51567780355814	VRAI	0.00599013089974548	FAUX	0.0594082754931979	FAUX	0.559583198445899	FAUX	1.98826462440353	FAUX	1.19006971175953	FAUX	7.44219569566203	VRAI	8.19269623580194	VRAI	0.0334688920689238	FAUX
6Q1G4	hi.EMS	1	22108	5.423653702	5.423269637	0.0045437	4.971027115	4.969725679	0.023011246	0.916495518	0.914832649	0.000563069	5260	5.445430594	5.448758865	0.004393437	4.870854791	4.963584794	0.191634457	0.894380903	0.911236444	0.006196306	0.075665399	0.433269962	0.240964234	1.591428656	5.591256009	5.585358617	0.059047834	-0.677912871780202	FAUX	3.00357438377428	VRAI	6.21371881023246	VRAI	5.2298326742381	VRAI	3.89080318789561	VRAI	6.26569726899379	VRAI	9.36567294303884	VRAI	0.237509222605377	FAUX	3.5559314259489	VRAI	6.32700725534061	VRAI
6Q1G5	hi.EMS	1	20739	5.420383389	5.418748616	0.004583993	4.960800564	4.959046165	0.021129183	0.91516566	0.91317681	0.000504704	9772	5.421449667	5.4201258	0.004305037	4.926087767	4.945108986	0.061539258	0.908572346	0.911450646	0.001881502	0.153192796	0.716332378	0.343212365	1.297629186	5.463874619	5.442965531	0.045443377	3.06766040616104	VRAI	3.06754023946654	VRAI	-1.18401565660426	FAUX	-1.30388455628701	FAUX	-0.176575555642621	FAUX	-0.729200421048197	FAUX	-0.810449854043907	FAUX	2.7824946794504	VRAI	2.6090170892454	VRAI	-1.19786766617147	FAUX
6Q2D7	lo.sham	1	17576	5.421648609	5.420158812	0.00465639	4.935242657	4.937537951	0.025109779	0.910242372	0.90921269	0.000648443	7940	5.424957887	5.424295098	0.004456524	4.824142946	4.842309623	0.068397465	0.88919626	0.891470787	0.00211241	0.177078086	0.699496222	0.317388996	1.243408215	5.467762479	5.449601804	0.047965501	-2.04630509774799	FAUX	-2.89892495481606	VRAI	-0.788123729585481	FAUX	-0.826029593307583	FAUX	-0.927214162646924	FAUX	0.289335769516649	FAUX	-0.336188561870131	FAUX	-1.91484567109795	FAUX	-2.65961260363127	VRAI	-0.801180084634825	FAUX
6Q2E11	lo.EMS	1	25161	5.422123308	5.420576198	0.004538279	4.957369083	4.957576162	0.021538137	0.914233542	0.912678749	0.000511716	11915	5.408250762	5.400221003	0.004625581	4.74107363	4.756213777	0.067876157	0.876563902	0.879155177	0.00207363	0.278640369	0.790096517	0.350093323	1.341094287	5.40569794	5.386145679	0.041405443	-5.38038624525264	VRAI	-6.57666154001213	VRAI	-0.854612066627889	FAUX	-0.904387975084178	FAUX	0.425158095861727	FAUX	-5.59183103904357	VRAI	-4.87108093878675	VRAI	-5.74245403915085	VRAI	-7.07216067232834	VRAI	-0.831333215001947	FAUX
6Q2F10	lo.EMS	1	21066	5.420661938	5.418346873	0.004528839	4.958471641	4.95796865	0.020679864	0.914690436	0.913137298	0.00049448	9430	5.424521952	5.423052447	0.004542633	4.780441185	4.822063408	0.104547575	0.881207876	0.888145907	0.003348926	0.156839873	0.7	0.260632361	1.250349697	5.465629942	5.45082932	0.046157958	-4.15469376860643	VRAI	-3.89181388336991	VRAI	1.33188381467263	FAUX	1.37569471379464	FAUX	-0.831115839748475	FAUX	-0.0142369220351972	FAUX	-0.248464123119043	FAUX	-3.92850407298305	VRAI	-3.69726309488351	VRAI	1.28978913052355	FAUX
6Q2F4	hi.EMS	1	20833	5.421746781	5.420870436	0.00464939	4.962597221	4.962345653	0.022695228	0.915263636	0.913729482	0.000551339	11704	5.414695459	5.410129103	0.004854248	5.062147345	5.07861992	0.067695046	0.934851387	0.936482141	0.002094899	0.250341763	0.774692413	0.314015595	1.172650694	5.418761979	5.404300779	0.042271676	10.003535337239	VRAI	10.5425451270565	VRAI	-0.818146351296404	FAUX	-0.861322251113757	FAUX	-1.90678583056334	FAUX	-3.17133760591994	VRAI	-3.57362660176007	VRAI	9.05175033705736	VRAI	9.45166329509883	VRAI	-0.841808909972904	FAUX
6Q2G6	hi.EMS	1	20968	5.422152794	5.421570202	0.004579828	4.961633554	4.962674697	0.026112721	0.915014416	0.913814874	0.000663723	9311	5.420358348	5.416381684	0.004669707	4.948839586	4.980641797	0.08902519	0.912953357	0.917953502	0.002806657	0.22833208	0.751584148	0.290256136	1.267339694	5.432831971	5.420975061	0.046564822	4.22394858150491	VRAI	5.00944903809378	VRAI	0.402163236032886	FAUX	0.471259654130385	FAUX	-0.595905229427845	FAUX	-1.64386702623521	FAUX	-2.38199893252626	FAUX	3.83083667847232	VRAI	4.430129765848	VRAI	0.391954264161151	FAUX
6Q2H4	hi.EMS	1	26835	5.423851641	5.423117205	0.004510869	4.969658103	4.967042253	0.019760862	0.916210254	0.914077838	0.000453403	8587	5.448526438	5.455525483	0.004215741	5.067610424	5.122409219	0.127795829	0.929972389	0.939105792	0.004015609	0.08734133	0.575171771	0.316292671	1.741447897	5.523933962	5.519923764	0.044667634	8.71581255020961	VRAI	11.3260302544263	VRAI	2.47491228306983	FAUX	2.39233578385799	FAUX	5.96767920120203	VRAI	7.91874421376175	VRAI	4.68937075701094	VRAI	9.30347417327787	VRAI	11.6959340202166	VRAI	2.63449827304574	VRAI
6Q3E10	lo.EMS	1	19964	5.422745009	5.421328291	0.004615464	4.95909901	4.962433267	0.023282551	0.914456339	0.913236719	0.000581925	10457	5.421335053	5.420605878	0.004557668	4.788367815	4.812298227	0.076488997	0.883191388	0.886427218	0.002396363	0.182365879	0.716649135	0.300102116	1.229411279	5.456639508	5.438929798	0.044544052	-3.63118185063756	VRAI	-4.40505564840418	VRAI	-0.301286113076901	FAUX	-0.272924584142447	FAUX	-1.12098864413617	FAUX	-0.61192004979773	FAUX	-1.09886353856952	FAUX	-3.5632665005627	VRAI	-4.19774404215274	VRAI	-0.333155386633383	FAUX
6Q4A11	lo.EMS	1	20711	5.422975907	5.421947607	0.004552337	4.935849539	4.940386974	0.024486292	0.91012793	0.909553205	0.00062466	8640	5.427555416	5.427672705	0.004319398	4.730106444	4.774699404	0.107114698	0.871415909	0.880986794	0.003399104	0.140162037	0.686805556	0.288030293	1.434336603	5.470556677	5.458459563	0.043154017	-6.7391053702795	VRAI	-6.02969676514779	VRAI	1.41791403066319	FAUX	1.45554978993558	FAUX	1.71601071073089	FAUX	1.11446627518098	FAUX	0.296831241429595	FAUX	-6.24779217035194	VRAI	-6.12474309636884	VRAI	1.43827485199231	FAUX
6Q4C10	lo.EMS	1	22075	5.425212471	5.425095465	0.004566955	4.946219845	4.952429168	0.024590409	0.911662377	0.911141387	0.000624231	7918	5.433027458	5.435775905	0.004488367	4.768886872	4.834255348	0.153175523	0.877663205	0.889440953	0.004925522	0.150416772	0.618590553	0.257673671	1.505291227	5.49744588	5.488183942	0.05134295	-5.0902452115917	VRAI	-3.50508208090847	VRAI	4.03495875607829	VRAI	3.65196504952325	VRAI	2.69831108524603	VRAI	3.09403272962611	VRAI	2.42108417581033	FAUX	-4.46089542102184	VRAI	-3.07240691656486	VRAI	4.10249266764481	VRAI
6Q4D12	lo.EMS	1	23646	5.42556442	5.425733064	0.004533756	4.966874845	4.967571375	0.020411684	0.915407772	0.914048865	0.000473681	7873	5.432050287	5.434367677	0.004669535	4.908395467	4.95070067	0.115653754	0.903527661	0.91099702	0.003677928	0.163216055	0.649307761	0.272218269	1.35475355	5.482287178	5.476232938	0.049084723	1.73620754885605	FAUX	2.9320766338314	VRAI	1.89595797309517	FAUX	1.88892450608738	FAUX	0.614257810638608	FAUX	2.75001050272684	VRAI	1.56700559890226	FAUX	1.967281568389	FAUX	2.89559972454423	VRAI	1.93218491817229	FAUX
6Q4E6	hi.EMS	1	31841	5.422407134	5.421289608	0.004542318	4.955060043	4.957458825	0.024294583	0.913756996	0.912681597	0.000602207	7603	5.437573028	5.441351018	0.004386319	4.947152472	4.999980435	0.129375045	0.909711146	0.919617759	0.004110326	0.106799947	0.546100224	0.288192699	1.565157852	5.540429504	5.524868461	0.059644264	3.36822595463412	VRAI	5.50643610215869	VRAI	2.63730464561871	VRAI	2.52969990745617	FAUX	3.52710848904112	VRAI	4.45600166468151	VRAI	5.04274355958062	VRAI	3.75309904952327	VRAI	5.42126550261902	VRAI	2.72584217324647	VRAI
6Q4F12	lo.EMS	1	18495	5.423181095	5.422141527	0.00453853	4.958680328	4.960922437	0.025632055	0.91430522	0.913259467	0.000665064	8584	5.414794746	5.408629128	0.00474444	4.575013816	4.605477432	0.08780781	0.844857442	0.849863554	0.002795046	0.232758621	0.73415657	0.272128656	1.170707415	5.431374274	5.415264728	0.049933003	-13.7487297120948	VRAI	-15.3238428446223	VRAI	0.382256168436202	FAUX	0.450978881305314	FAUX	-1.93368870992308	FAUX	-3.53777311195532	VRAI	-2.79008791670792	VRAI	-13.3940390559783	VRAI	-14.7976363940281	VRAI	0.321539427162051	FAUX
6Q4F4	hi.EMS	1	17797	5.426235721	5.42672429	0.004626418	4.966134357	4.969234142	0.019631961	0.915160254	0.913681901	0.000450416	7581	5.427845844	5.42677875	0.004571343	4.925660629	4.952944926	0.079017557	0.907424804	0.911750458	0.002461689	0.134810711	0.659807413	0.303642478	1.262415812	5.486122819	5.469866179	0.041711852	2.76478756578003	VRAI	3.15707129485727	VRAI	-0.189284640523206	FAUX	-0.150395415918876	FAUX	-0.664071768266361	FAUX	0.89607806684567	FAUX	1.11200512645357	FAUX	2.7628133210158	VRAI	3.01062138863778	VRAI	-0.186900199064635	FAUX
6Q4G10	lo.EMS	1	18611	5.424315033	5.421832529	0.004555262	4.965186768	4.96510288	0.02047754	0.915316095	0.913441262	0.000493223	8472	5.42317764	5.421163651	0.004614535	4.811497528	4.84450824	0.085510542	0.887158227	0.892275941	0.00269584	0.158404155	0.67516525	0.282891487	1.217771321	5.4788314	5.457872817	0.046100404	-2.5842068420852	VRAI	-2.65848665557497	VRAI	0.21216741225701	FAUX	0.275950236500007	FAUX	-1.28213297072355	FAUX	-0.475659224445442	FAUX	0.254899434805961	FAUX	-2.49751217282196	FAUX	-2.54693001036014	FAUX	0.188662468641912	FAUX
6Q4G11	lo.EMS	1	20428	5.421443088	5.419116072	0.004567219	4.95248143	4.954314886	0.02264688	0.913457489	0.912222931	0.000566747	9534	5.418508371	5.415696014	0.004510987	4.723651923	4.759901923	0.100095995	0.871694301	0.877543021	0.003188577	0.192993497	0.73096287	0.279482401	1.316518727	5.450896264	5.430649002	0.045257023	-6.66562886503668	VRAI	-7.05808999562604	VRAI	1.05696534235667	FAUX	1.11641552863505	FAUX	0.0849324638871422	FAUX	-1.8113723736066	FAUX	-1.69065067740289	FAUX	-6.54519896001866	VRAI	-6.88313736556656	VRAI	1.03230397380301	FAUX
7Q1C6	hi.EMS	1	28802	5.423427228	5.42264318	0.004728032	4.921953293	4.91807754	0.019115679	0.907482707	0.90530031	0.000422147	6414	5.433225354	5.436394845	0.004601342	5.158942955	5.221612429	0.131549334	0.949466385	0.961805032	0.004250825	0.125506704	0.496414094	0.239006928	1.277946222	5.569938417	5.553290624	0.073214952	8.81827705809334	VRAI	10.2088199222066	VRAI	3.01087716747244	VRAI	2.73861449329293	VRAI	0.505094467980582	FAUX	1.89408504642613	FAUX	3.97242323493354	VRAI	8.58245481561366	VRAI	9.71963614277463	VRAI	2.97716924224435	VRAI
7Q1D10	lo.EMS	1	12387	5.42088524	5.419250066	0.004773999	4.95066427	4.951182039	0.018989574	0.91322881	0.911398278	0.00046096	7301	5.429174703	5.428578585	0.004626385	4.833279408	4.855204072	0.060275878	0.890173665	0.893000653	0.001816474	0.17586632	0.582249007	0.367003329	1.324710233	5.515303508	5.497968498	0.070185325	-3.22567914053046	VRAI	-3.25482088903499	VRAI	-0.807262561953571	FAUX	-0.829432662034575	FAUX	1.00887235277901	FAUX	0.345456879138255	FAUX	1.18121924389907	FAUX	-2.97206833380588	VRAI	-2.99146153482489	VRAI	-0.772676139758045	FAUX
7Q1E6	hi.EMS	1	19207	5.420526644	5.418732057	0.004707472	4.970565508	4.962468781	0.023397319	0.916935157	0.914280057	0.000561409	9272	5.417457591	5.414022706	0.004971632	5.166691228	5.252695298	0.187522203	0.953628407	0.969396926	0.006114752	0.292601381	0.684749784	0.235315169	1.445196138	5.440262069	5.421396599	0.063455056	9.66369637206153	VRAI	11.6944017322396	VRAI	5.93433961452704	VRAI	4.79277662659991	VRAI	2.3068391668088	FAUX	-2.53848559706349	FAUX	-2.68211366723826	VRAI	8.85736307774879	VRAI	10.7979341029902	VRAI	5.9220187853488	VRAI
7Q1G5	hi.EMS	1	20278	5.417548981	5.414771187	0.004721902	4.966285967	4.960351842	0.020576157	0.916654752	0.914484092	0.000477141	9344	5.456872404	5.469912543	0.004433183	5.053858835	5.09025981	0.098756642	0.926081572	0.931475357	0.003102928	0.075663527	0.405286815	0.28702107	1.35468752	5.595342457	5.593513119	0.055608394	4.06818862421801	VRAI	4.27390914971499	VRAI	1.21046665108062	FAUX	1.23820795782757	FAUX	1.33181073881385	FAUX	8.53491470478625	VRAI	6.00179550767237	VRAI	4.85407652961415	VRAI	5.16287334405517	VRAI	1.25187722526082	FAUX
7Q2B4	hi.EMS	1	40881	5.421368222	5.419966482	0.004653372	4.901360377	4.900481833	0.01900063	0.9040346	0.90223471	0.000434485	6018	5.449175379	5.459614856	0.004446934	4.827007955	4.846250492	0.071242822	0.885758067	0.88949036	0.002172694	0.128614158	0.534729146	0.329831666	1.320178236	5.523951596	5.533161101	0.050808772	-4.12260660317224	VRAI	-3.94171501962826	VRAI	-0.248551951028469	FAUX	-0.198567065151489	FAUX	0.960050196301183	FAUX	6.49464376368191	VRAI	2.95681503261646	VRAI	-3.19457911076121	VRAI	-3.30207079842365	VRAI	-0.195682310343081	FAUX
7Q2B5	hi.EMS	1	31990	5.422046264	5.420560532	0.004689559	4.902659158	4.898952688	0.01933365	0.904156127	0.902095257	0.000433838	6534	5.436872892	5.442493879	0.004643324	5.040596035	5.076651365	0.141984422	0.927093185	0.932562592	0.004634667	0.125803489	0.477655341	0.190893971	1.055596772	5.568582129	5.562229203	0.06655332	4.2736746039801	VRAI	4.48665929338551	VRAI	3.6129112989606	VRAI	3.19374784393129	VRAI	-1.89022477884565	FAUX	3.10248085793281	VRAI	4.42340730194098	VRAI	4.38351317968503	VRAI	4.69078183650465	VRAI	3.52618101666411	VRAI
7Q2C5	hi.EMS	1	22172	5.417822699	5.415819398	0.004677492	4.913907983	4.908104172	0.018507486	0.906940047	0.904980659	0.000410856	7648	5.451563058	5.462605349	0.004439374	5.009920139	5.061096075	0.115293408	0.918906221	0.928105287	0.003633283	0.138990586	0.499869247	0.287298019	1.464111043	5.550230235	5.550024003	0.071807564	2.61068063413505	VRAI	3.61445385561603	VRAI	2.04229800826771	FAUX	1.96084737965121	FAUX	2.51060506772913	FAUX	7.08714730039618	VRAI	3.80761023457277	VRAI	3.29513422623346	VRAI	4.15115219428722	VRAI	2.121911023234	FAUX
7Q2E6	hi.EMS	1	22130	5.41829504	5.415412432	0.00472111	4.937310716	4.935114107	0.018113891	0.911187042	0.909467717	0.000407332	9703	5.452326608	5.461316907	0.004148703	5.02531522	5.062017599	0.083982356	0.921630757	0.928103051	0.002626038	0.071730393	0.479130166	0.287446228	1.293285756	5.574583005	5.560023857	0.049113096	3.16410763572266	VRAI	3.61401631513837	VRAI	0.462492075694424	FAUX	0.53354284745681	FAUX	0.670343723274649	FAUX	6.83186951113148	VRAI	4.31213951449528	VRAI	3.84135077837859	VRAI	4.18312084716445	VRAI	0.474571181205898	FAUX
7Q2F1	hi.sham	1	20826	5.417621481	5.413969972	0.004764585	4.958040073	4.951468662	0.02225088	0.91511849	0.913106106	0.000531916	10123	5.458742282	5.470282566	0.004246273	5.015120479	5.068834962	0.122889723	0.91864758	0.927779199	0.003899855	0.094339623	0.427936382	0.279356364	1.502838787	5.578186966	5.580582877	0.064200927	2.55814364687646	FAUX	3.55064495611481	VRAI	2.46040088001979	FAUX	2.30410493785371	FAUX	2.92781010506724	VRAI	8.60822701020387	VRAI	5.34941741440386	VRAI	3.47964197807851	VRAI	4.41962245893489	VRAI	2.5215690210584	FAUX
7Q2F6	hi.EMS	1	12904	5.425495305	5.425105257	0.004761926	4.979702925	4.978089173	0.021025734	0.91779506	0.915910574	0.000508759	7533	5.424752245	5.423774899	0.004791099	5.103992344	5.115993055	0.055640024	0.940833084	0.942119208	0.001679212	0.17735298	0.620337183	0.344428069	1.173747295	5.500073065	5.476507018	0.061559047	7.06461996336847	VRAI	6.35669790233748	VRAI	-1.02255012547275	FAUX	-1.08890639142782	FAUX	-0.617416495467904	FAUX	-0.606292863885661	FAUX	0.0984089298214003	FAUX	6.63281042733877	VRAI	6.05558712775469	VRAI	-1.01657810114936	FAUX
7Q2G12	lo.EMS	1	22488	5.421738695	5.420914925	0.004647153	4.939948528	4.937063798	0.017879303	0.911095148	0.909237839	0.000400708	9135	5.431752052	5.433621045	0.004378955	4.836815969	4.867626563	0.086087485	0.890410478	0.895009048	0.002712142	0.153585112	0.620032841	0.291704766	1.293386422	5.499299155	5.483597281	0.050335218	-3.17757601085004	VRAI	-2.86181815752143	VRAI	0.597541254412899	FAUX	0.665236964626003	FAUX	0.671428174831876	FAUX	1.34451468791408	FAUX	0.456138681260856	FAUX	-2.84659136126701	VRAI	-2.56051203958699	FAUX	0.585326414671346	FAUX
7Q2H5	hi.EMS	1	28314	5.424163815	5.423783083	0.00469467	4.947246405	4.944137073	0.019137018	0.912019809	0.909636609	0.000416737	8142	5.423133373	5.421839106	0.004917915	5.173625696	5.241720761	0.167645881	0.953933478	0.967423006	0.005457026	0.231392778	0.667035127	0.223326808	1.303907493	5.456163096	5.449817679	0.055915665	9.72566454895525	VRAI	11.3081450686902	VRAI	4.90273415924288	VRAI	4.10926471501155	VRAI	0.784769241623476	FAUX	-0.989829691708446	FAUX	-1.24816602890079	FAUX	9.10339758720805	VRAI	10.417215680202	VRAI	4.87628397121417	VRAI
7Q3F6	hi.EMS	1	27455	5.42098776	5.419704677	0.004641163	4.937948854	4.936126525	0.019637496	0.910843707	0.908794093	0.000445064	8124	5.441937647	5.447605279	0.004438866	5.163117484	5.199428785	0.095965477	0.948709313	0.954210464	0.003015916	0.106720827	0.565608075	0.282688838	1.314407876	5.529588633	5.519264093	0.047156356	8.66449524462275	VRAI	8.72271486385629	VRAI	1.07399332651206	FAUX	1.11390514139495	FAUX	0.897887441371425	FAUX	4.11519768340647	VRAI	2.25566005182202	FAUX	8.7305668545961	VRAI	8.95006181309007	VRAI	1.1050282049796	FAUX
7Q4A10	lo.EMS	1	22982	5.421246191	5.419656759	0.004765888	4.891060682	4.888527689	0.016403742	0.90215629	0.900406347	0.000344442	10569	5.422424947	5.420876203	0.004529887	4.817114552	4.852306103	0.08667624	0.888314732	0.893450145	0.002740476	0.190746523	0.671586716	0.283721276	1.241075609	5.469572732	5.452893013	0.054609549	-3.60327874513918	VRAI	-3.16686429494195	VRAI	0.64198150608308	FAUX	0.708114750256031	FAUX	0.10789587378041	FAUX	-1.18060874820949	FAUX	-1.09300415868336	FAUX	-3.54559645686302	VRAI	-3.09199517801812	VRAI	0.616302044895883	FAUX
7Q4B10	lo.EMS	1	15099	5.419812093	5.418378362	0.004764946	4.906666718	4.907819664	0.019671916	0.905280337	0.903588712	0.000465885	8050	5.448569602	5.45607742	0.004051012	4.829101286	4.856849679	0.079265162	0.886237581	0.890258591	0.002459684	0.076397516	0.505341615	0.313453194	1.386539105	5.575982471	5.546706726	0.055040047	-4.02520433165177	VRAI	-3.79138757834635	VRAI	0.201575381039901	FAUX	0.272843120401614	FAUX	1.67494050411087	FAUX	5.79377493004806	VRAI	3.64024145337722	VRAI	-3.1203078522132	VRAI	-2.93437366846944	VRAI	0.226389752527746	FAUX
7Q4C1	hi.sham	1	35172	5.424356073	5.423828094	0.004675228	4.935850874	4.936121494	0.018077386	0.909892577	0.908092362	0.000393308	5534	5.43767659	5.441877297	0.004426798	5.055181588	5.114814408	0.144898209	0.929584644	0.940540334	0.004656321	0.15648717	0.574810264	0.248433785	1.421337846	5.510204668	5.507532053	0.058864627	4.77975735860269	VRAI	6.04774383965772	VRAI	3.64687435428869	VRAI	3.21885127058811	VRAI	2.04981930000004	FAUX	2.9803180521097	VRAI	1.66373564040341	FAUX	4.90100772685824	VRAI	6.01469860308492	VRAI	3.67948143647382	VRAI
7Q4F5	hi.EMS	1	15895	5.424022184	5.422940121	0.004719051	4.948072553	4.948371392	0.018993705	0.912203774	0.909950938	0.000426519	8436	5.428682048	5.429267666	0.004493291	5.060752252	5.074794506	0.047532092	0.932165046	0.933605719	0.001381534	0.138217165	0.617472736	0.407060234	1.323944744	5.510178442	5.485020455	0.052676598	5.30390684378135	VRAI	4.69077838366184	VRAI	-1.48944097168846	FAUX	-1.69087514095306	FAUX	1.00062591666265	FAUX	0.481983842947411	FAUX	0.527943024946724	FAUX	5.09865455205124	VRAI	4.62636541239309	VRAI	-1.44315333790776	FAUX
8Q1A5	hi.EMS	1	31869	5.415579135	5.411840164	0.004461822	4.85443879	4.856444905	0.024321181	0.896348495	0.895228745	0.000648551	11617	5.441183712	5.445112035	0.00404317	4.949540517	5.005347847	0.118701817	0.909582425	0.919200102	0.003813015	0.075664974	0.666437118	0.250492264	1.357256785	5.498772419	5.486930374	0.036995071	2.77882355384714	VRAI	3.86352412396813	VRAI	1.09817363620693	FAUX	1.12314805529996	FAUX	1.50803279072011	FAUX	4.73958247258756	VRAI	2.53138245280018	FAUX	3.3240168959264	VRAI	4.31850307612478	VRAI	1.12455099554874	FAUX
8Q1B11	lo.EMS	1	35270	5.419086915	5.415737701	0.004449313	4.866766021	4.869108457	0.024467401	0.898045871	0.896836176	0.000657363	10938	5.435825098	5.439144722	0.004318804	4.730742483	4.784553106	0.108739495	0.870220212	0.880013802	0.003459005	0.114646188	0.603675261	0.267545552	1.342485691	5.510683533	5.497492207	0.048242732	-7.10931842343987	VRAI	-6.48269161574738	VRAI	0.583534867013476	FAUX	0.636901333476518	FAUX	1.29719518227808	FAUX	3.48773071507925	VRAI	3.33430856836027	VRAI	-6.30342865931241	VRAI	-5.87043698616602	VRAI	0.635054734728608	FAUX
8Q1B6	hi.EMS	1	44467	5.416643622	5.413012934	0.00440453	4.860050598	4.859630579	0.022571999	0.897207721	0.895679545	0.000586903	8236	5.414045576	5.408768939	0.004730537	5.130843369	5.163569825	0.087809843	0.947663016	0.954185318	0.002813579	0.196940262	0.738343856	0.260635726	1.122923905	5.44036193	5.422623485	0.040052152	12.3450105562649	VRAI	13.1005429911882	VRAI	-0.354747221756493	FAUX	-0.318619590624643	FAUX	-1.83675561821791	FAUX	-2.88464783021243	VRAI	-2.35732205412827	FAUX	11.3016175385333	VRAI	11.6199190567666	VRAI	-0.393318609785512	FAUX
8Q1C5	hi.EMS	1	39951	5.415599325	5.411451342	0.004417183	4.866523343	4.86580255	0.024765905	0.898572765	0.897429453	0.000654983	10249	5.445698264	5.452906023	0.004175001	5.051373795	5.107094592	0.124479558	0.927516749	0.93722614	0.003972227	0.087228022	0.613718412	0.264151291	1.442359377	5.50805967	5.505914749	0.039516677	7.28408706580128	VRAI	8.6228731331961	VRAI	1.32962661132297	FAUX	1.33444945289214	FAUX	2.72275845487864	VRAI	6.37464293879703	VRAI	3.97460262822683	VRAI	7.8048356753881	VRAI	9.01377562493145	VRAI	1.40843888990581	FAUX
8Q1D5	hi.EMS	1	34899	5.416082609	5.412752779	0.004402226	4.875363213	4.875634154	0.024883571	0.90012673	0.898874851	0.000661983	12337	5.439206508	5.443672049	0.004169004	5.027453979	5.064725597	0.087617903	0.924237273	0.929400889	0.002746495	0.075788279	0.701548188	0.297003814	1.361577271	5.490742879	5.478474144	0.033136674	6.46025319499972	VRAI	6.55680067768422	VRAI	-0.452269967420666	FAUX	-0.423967637918068	FAUX	1.56970194911469	FAUX	4.43749525093727	VRAI	1.88852738150876	FAUX	6.75232746943533	VRAI	7.05858797598967	VRAI	-0.402749534855171	FAUX
8Q1E4	hi.EMS	1	41181	5.417407801	5.41419426	0.00440614	4.886037328	4.887195177	0.021159796	0.901883194	0.900354749	0.000545356	9648	5.433255988	5.434972674	0.004466511	4.968742129	5.042721172	0.155452263	0.914486592	0.928465633	0.005131673	0.148942786	0.6710199	0.1761461	1.0391718	5.477249929	5.472331452	0.047951129	4.01079441829845	VRAI	6.309868450149	VRAI	3.01516052953511	VRAI	2.76026267181411	VRAI	-3.03220488691703	VRAI	2.61249832468697	VRAI	1.42155087973655	FAUX	4.16891696528817	VRAI	6.04315723513625	VRAI	2.93027519322797	VRAI
8Q1F4	hi.EMS	1	34155	5.416127994	5.412115159	0.004464956	4.891500308	4.893248403	0.022564493	0.903102436	0.901566015	0.000588104	12790	5.430189525	5.431222193	0.004199499	4.957133281	4.994259947	0.089514516	0.912825021	0.918826255	0.002831783	0.112197029	0.716653636	0.287199491	1.325963764	5.472635548	5.458742822	0.038334885	3.59339283690506	VRAI	3.76481866528371	VRAI	-0.328283324820255	FAUX	-0.290249454730677	FAUX	1.06136677474551	FAUX	1.82570429672978	FAUX	0.388523193947186	FAUX	3.65811003509865	VRAI	3.80683351368407	VRAI	-0.30955991784391	FAUX
8Q1F5	hi.EMS	1	38129	5.41515975	5.410596732	0.004410705	4.890677702	4.891052159	0.021888833	0.903114742	0.901455992	0.00057062	10998	5.482597734	5.49561024	0.002812257	4.984005028	5.055527403	0.153214193	0.908951857	0.921713371	0.00490076	0.037097654	0.380614657	0.275868758	2.036219203	5.587286836	5.583992931	0.034138424	2.62041920015053	VRAI	4.52709336336911	VRAI	2.67947288763016	VRAI	2.49029364734726	FAUX	11.1993131002991	VRAI	15.3333399443782	VRAI	9.91022113149758	VRAI	4.84050768505494	VRAI	6.63412203571023	VRAI	2.82030816983185	VRAI
8Q1G4	hi.EMS	1	40680	5.416099304	5.41138061	0.004356377	4.906665905	4.909052983	0.024009974	0.905907024	0.904708889	0.000639872	10512	5.434563987	5.437714898	0.004347852	4.953935959	5.003348496	0.116288428	0.911500002	0.920788563	0.003725747	0.113108828	0.689212329	0.256213906	1.325053955	5.479637425	5.472843446	0.038908546	3.26053614527031	VRAI	4.28291968313356	VRAI	0.971308586886365	FAUX	1.00545462959939	FAUX	1.04838046826753	FAUX	3.18777532689581	VRAI	1.46047341842942	FAUX	3.51742301467703	VRAI	4.22623970331879	VRAI	1.00596971586269	FAUX
8Q1G6	hi.EMS	1	27070	5.41896572	5.415480842	0.004460761	4.909974574	4.913813852	0.02685711	0.906035787	0.904777197	0.00072856	14729	5.423575595	5.422033074	0.004380554	4.98749511	5.024653932	0.098492198	0.919557007	0.926038484	0.003163458	0.130083509	0.713286713	0.248519551	1.178411394	5.470148039	5.449378106	0.03711398	5.28452827578673	VRAI	5.66903715996763	VRAI	0.153886144325363	FAUX	0.211533241620805	FAUX	-1.04474593503441	FAUX	-0.102033492473318	FAUX	-0.323396322409798	FAUX	4.9940765897843	VRAI	5.20941443575034	VRAI	0.131556296812893	FAUX
8Q2A10	lo.EMS	1	33705	5.41482428	5.410487045	0.004452154	4.889769703	4.894999649	0.033005541	0.903006524	0.902836314	0.000954645	10945	5.424041258	5.42235014	0.004484069	2.748955805	2.797959644	0.166962069	0.506757041	0.516738555	0.005590262	0.128643216	0.706258566	0.13932679	0.850173202	5.463430413	5.453229637	0.044395835	-98.414536409099	VRAI	-102.396928947683	VRAI	3.68183005447977	VRAI	3.27897473673309	VRAI	-5.72990706125951	VRAI	-0.0355178548075618	FAUX	-0.0305972576272896	FAUX	-93.5050501535102	VRAI	-97.5450920109282	VRAI	3.49580670282635	VRAI
8Q2A5	hi.EMS	1	34820	5.417219286	5.414487	0.004388086	4.89321355	4.894277285	0.022029594	0.903236212	0.901915214	0.000569546	11852	5.441304836	5.444918754	0.004245193	4.959716248	5.028961454	0.152341619	0.911430042	0.924184696	0.004935605	0.072814715	0.60479244	0.225902385	1.353260361	5.512213396	5.505988577	0.041849536	3.24296156396485	VRAI	5.17958828156635	VRAI	2.73012848468264	VRAI	2.53143359689681	FAUX	1.45098918389719	FAUX	4.69903505039879	VRAI	3.98021514162856	VRAI	3.77176450314329	VRAI	5.40819219321062	VRAI	2.77743445923618	VRAI
8Q2B12	lo.EMS	1	29606	5.415887292	5.412396701	0.004455813	4.912147881	4.914427786	0.024161849	0.906960527	0.905798462	0.000650944	13702	5.42384455	5.422317294	0.004339276	4.819568281	4.857820803	0.103795407	0.88854723	0.894937986	0.003342804	0.12625894	0.723033134	0.2393127	1.170431927	5.464952482	5.447277446	0.038355758	-2.50540664631761	FAUX	-2.54231379484543	FAUX	0.41460873605941	FAUX	0.471912930933679	FAUX	-1.15864215280421	FAUX	-0.0424084474121305	FAUX	-0.483091592531234	FAUX	-2.39495874067669	FAUX	-2.48937741086081	FAUX	0.392128177128313	FAUX
8Q2C2	hi.sham	1	42721	5.418188927	5.415069383	0.004410432	4.911297837	4.912893975	0.022292416	0.906407906	0.905038122	0.000570384	8204	5.444689667	5.451524706	0.004148584	4.995014164	5.052359148	0.12504633	0.917355142	0.927267294	0.004023314	0.083373964	0.569478303	0.238233765	1.307943087	5.530319067	5.518793509	0.051471785	4.73139998153105	VRAI	5.99347537850624	VRAI	1.40389386592535	FAUX	1.40134983707506	FAUX	0.804145715751074	FAUX	6.08486358347816	VRAI	4.95366495008239	VRAI	5.32492637709041	VRAI	6.48791764628116	VRAI	1.43628709384236	FAUX
8Q2D4	hi.EMS	1	57595	5.41585257	5.411676935	0.004424335	4.912196563	4.914189725	0.02518837	0.906964373	0.90581566	0.000667843	5286	5.441800792	5.445677358	0.003963854	5.047230505	5.082167583	0.09437	0.927414375	0.932152972	0.002959247	0.076995838	0.663828982	0.309299274	1.509166082	5.490807642	5.486899942	0.036770889	7.25836979612483	VRAI	7.28342310571658	VRAI	-0.142983711598948	FAUX	-0.0941050773739108	FAUX	3.67633480542467	VRAI	4.85817866338732	VRAI	2.52906896729547	FAUX	7.6225246273164	VRAI	7.86347739100214	VRAI	-0.0709868961656338	FAUX
8Q2D5	hi.EMS	1	26089	5.418074223	5.414221033	0.004432599	4.914652693	4.916238064	0.025375355	0.907051467	0.905885013	0.000681519	12398	5.44325947	5.448251696	0.003934307	4.952217801	4.990731671	0.090139246	0.90971199	0.915014594	0.002818886	0.061945475	0.615744475	0.310199549	1.484786403	5.524580688	5.501910576	0.038438978	2.81137144731258	VRAI	2.75843972589264	VRAI	-0.347032219502009	FAUX	-0.310339410058728	FAUX	3.32834749893644	VRAI	5.3982357292258	VRAI	3.6701994935701	VRAI	3.44182145511138	VRAI	3.64401535721711	VRAI	-0.278863961718204	FAUX
8Q2F3	hi.sham	1	39994	5.420861539	5.418743649	0.004406266	4.910990104	4.914739713	0.025740629	0.905902082	0.904829297	0.000683039	9660	5.421114256	5.418278084	0.004775127	4.967848492	4.998629813	0.092258593	0.916348767	0.922708469	0.002939747	0.220703934	0.730745342	0.264794917	1.16391316	5.436293738	5.42911005	0.045034475	4.47858952896853	VRAI	4.78982545571159	VRAI	-0.171331656570198	FAUX	-0.123834477756586	FAUX	-1.25168883196493	FAUX	-0.889773440239758	FAUX	-1.86420381993744	FAUX	4.12959558105834	VRAI	4.00848823857738	VRAI	-0.174730363960536	FAUX
8Q2G11	lo.EMS	1	29646	5.418391364	5.414480311	0.004433647	4.912169771	4.916127447	0.025484682	0.906544122	0.905495058	0.00069471	13068	5.424784718	5.424110324	0.004256076	4.792807928	4.845194189	0.114028916	0.883438908	0.892164818	0.003663687	0.089225589	0.679675543	0.254704753	1.318377751	5.491895632	5.46394149	0.038048265	-3.78866308318763	VRAI	-3.27450321845712	VRAI	0.8810894348394	FAUX	0.920917025394989	FAUX	0.95308658652586	FAUX	0.333742050603479	FAUX	0.783733599501494	FAUX	-3.57245488557563	VRAI	-3.07205348662696	VRAI	0.894949145028081	FAUX
8Q3B12	lo.EMS	1	28746	5.41860452	5.415920246	0.004423631	4.901249544	4.903477964	0.023411452	0.904492465	0.903069059	0.000621366	14615	5.429127795	5.428873923	0.004242392	4.810969684	4.852406792	0.09400532	0.886080259	0.893319788	0.002982502	0.106329114	0.682312692	0.276719912	1.302600505	5.483040417	5.466683784	0.041215808	-3.12513195245957	VRAI	-2.96956070556616	VRAI	-0.109176970044771	FAUX	-0.0587786314164782	FAUX	0.727887504153108	FAUX	1.33307286837943	FAUX	0.992206832239008	FAUX	-2.77331005835324	VRAI	-2.73921594109819	VRAI	-0.0889053589894495	FAUX
8Q3B4	hi.EMS	1	31431	5.419040025	5.41644245	0.004498125	4.877924594	4.884118197	0.028217954	0.900101181	0.899555657	0.000763181	11693	5.452054381	5.460264723	0.003979668	4.990494577	5.028007687	0.087931412	0.915266145	0.921501974	0.002736526	0.048747114	0.543915163	0.314405677	1.477879362	5.554389307	5.53303066	0.037005642	4.20662514414763	VRAI	4.47127898516223	VRAI	-0.46676230913443	FAUX	-0.439732193911657	FAUX	3.2297587277966	VRAI	7.91838658488637	VRAI	6.03599415838104	VRAI	5.12605768993089	VRAI	5.36417903079388	VRAI	-0.387345346631435	FAUX
8Q3C5	hi.EMS	1	25888	5.41759487	5.414548868	0.004451875	4.889447024	4.888280612	0.025262997	0.902471052	0.900778439	0.000664835	13135	5.421840727	5.418874447	0.004563217	5.123837261	5.137192645	0.049290608	0.945010574	0.946974646	0.00149723	0.128130948	0.71001142	0.338292664	1.111831806	5.475178698	5.449732884	0.036487594	11.6786932665709	VRAI	11.1967355855305	VRAI	-2.26837742765192	FAUX	-2.69480493543207	VRAI	-1.99508049420626	FAUX	-0.764665528242586	FAUX	-0.296425575814361	FAUX	10.9933381537006	VRAI	10.4027002733163	VRAI	-2.28595182342305	FAUX
8Q3D6	hi.EMS	1	43993	5.41745579	5.414242785	0.0044454	4.891087247	4.894598484	0.024573237	0.902802542	0.901933355	0.000652937	6982	5.440166646	5.442837092	0.004154187	4.951243831	4.98323827	0.077567668	0.910082466	0.915286494	0.002429327	0.061730163	0.595817817	0.283746202	1.226104206	5.522380436	5.509365855	0.037011153	2.90443835102495	VRAI	2.83022849032379	VRAI	-0.913350019248441	FAUX	-0.940436043868826	FAUX	-0.363994839553233	FAUX	4.26233393664168	VRAI	4.23696079417835	VRAI	3.39896529696404	VRAI	3.29821992157444	VRAI	-0.896565379480913	FAUX
8Q3E10	lo.EMS	1	32983	5.419753221	5.416913312	0.004415227	4.910463253	4.913464158	0.024237646	0.905997474	0.904954402	0.000643461	11182	5.446613527	5.452652626	0.003992133	4.76597936	4.811434239	0.095156556	0.874942191	0.882336442	0.002972018	0.065641209	0.618404579	0.320097548	1.562784831	5.523396652	5.505437603	0.037418488	-5.92311482340935	VRAI	-5.86945345532669	VRAI	-0.12441798825393	FAUX	-0.0746876622661112	FAUX	4.44167072480977	VRAI	6.32148409162459	VRAI	3.93832928586897	VRAI	-4.75295259400121	VRAI	-4.62996245446753	VRAI	-0.0323396590129255	FAUX
8Q3H4	hi.EMS	1	31554	5.416211836	5.412300913	0.004502557	4.910019064	4.912617897	0.024365421	0.906510258	0.905269715	0.000652023	11162	5.440946039	5.446137793	0.004242478	4.927855977	5.02370093	0.204022499	0.905603027	0.922823275	0.006655516	0.098907006	0.623096219	0.225842326	1.566154446	5.502605239	5.497011935	0.048600065	1.77916298069461	FAUX	4.82013726479318	VRAI	5.23043322229539	VRAI	4.40724170444073	VRAI	4.48976747160255	VRAI	4.9547709426876	VRAI	3.29779758287393	VRAI	2.36986422634438	FAUX	5.16543657552931	VRAI	5.31676188871436	VRAI
8Q4A4	hi.EMS	1	31732	5.416127265	5.412799786	0.004476121	4.883164455	4.884087005	0.024815855	0.901557077	0.900390575	0.000652589	13043	5.423129101	5.420324659	0.004408508	5.096776102	5.126025825	0.080300248	0.939775824	0.94445346	0.002527048	0.13516829	0.729050065	0.292263399	1.247346357	5.464327185	5.445013847	0.040974486	10.3636769788534	VRAI	10.5310760495204	VRAI	-0.771289017682514	FAUX	-0.777893574912192	FAUX	-0.0607915483816682	FAUX	-0.460433046896371	FAUX	-0.655173725647306	FAUX	9.80260608828284	VRAI	9.88738881638995	VRAI	-0.762300727887451	FAUX
8Q4A5	hi.EMS	1	37131	5.417980881	5.414866431	0.004416177	4.887662209	4.890161035	0.024360859	0.902087248	0.90088771	0.000653535	10317	5.443439876	5.447889511	0.004270548	4.998773279	5.058627181	0.142831328	0.918222389	0.93068223	0.004577564	0.106329359	0.592807987	0.264705805	1.530852759	5.508324891	5.510082321	0.048931321	4.94926022900686	VRAI	6.89510846438886	VRAI	2.20962968645435	FAUX	2.10151422370769	FAUX	3.98588311063042	VRAI	5.32225480970753	VRAI	4.29142759575628	VRAI	5.49033314211822	VRAI	6.77716644023439	VRAI	2.31014863131259	FAUX
8Q4B6	hi.EMS	1	37844	5.416128575	5.412358052	0.004474052	4.883520132	4.887324672	0.024119776	0.901626679	0.900878715	0.000638566	10174	5.475334981	5.483676429	0.002579346	5.006946583	5.085946698	0.150910291	0.914339786	0.929182307	0.004811075	0.030961274	0.418026342	0.291552013	2.230081358	5.593181261	5.578425448	0.035194462	3.97391543054646	VRAI	6.49908927015614	VRAI	2.54909414687393	FAUX	2.38372886137831	FAUX	13.9664360451276	VRAI	12.8298074039999	VRAI	9.48697286591365	VRAI	5.8499709223481	VRAI	8.03787092976627	VRAI	2.7071065071777	VRAI
8Q4C10	lo.EMS	1	29783	5.418481658	5.416179345	0.00445854	4.885437727	4.888878409	0.027960969	0.901583555	0.900651964	0.000758542	14538	5.429154501	5.429484194	0.004278688	4.732239889	4.775726924	0.102984696	0.871567424	0.878250068	0.003286743	0.099601046	0.687783739	0.272041492	1.334646301	5.486592428	5.466246861	0.035672763	-6.77088665057424	VRAI	-6.94836386527007	VRAI	0.333110574878216	FAUX	0.391289232235955	FAUX	1.18529837631067	FAUX	1.46109846782519	FAUX	0.958991301640428	FAUX	-6.23754052277146	VRAI	-6.27773581479559	VRAI	0.352294089944045	FAUX
8Q4C11	lo.EMS	1	28894	5.417862568	5.414574783	0.004477177	4.893078786	4.894609555	0.022589688	0.903105816	0.901708708	0.0005894	15150	5.434492597	5.435880184	0.004247035	4.780374384	4.829216904	0.110916687	0.879565897	0.887735486	0.003543261	0.081914191	0.676369637	0.266980892	1.364381086	5.49484605	5.477700651	0.03676146	-4.76159828496591	VRAI	-4.443963577175	VRAI	0.706021249141563	FAUX	0.754805544932777	FAUX	1.60972265774426	FAUX	2.80288015792693	VRAI	1.8297253033181	FAUX	-4.11954969136656	VRAI	-3.80935184113413	VRAI	0.742030532448005	FAUX
8Q4C6	hi.EMS	1	31525	5.416554115	5.412662947	0.004458721	4.881998362	4.885389493	0.024207978	0.901271341	0.900374786	0.00063436	13367	5.431303802	5.432432902	0.004267105	4.93546013	4.974140795	0.088475294	0.908641291	0.914513096	0.002779039	0.099199521	0.675544251	0.297818933	1.356115431	5.487715694	5.472007121	0.038623404	2.54240222734166	FAUX	2.6260310396672	VRAI	-0.4049594278748	FAUX	-0.372702089313681	FAUX	1.49174148909101	FAUX	2.07969268136481	FAUX	1.39689475896797	FAUX	2.70445849880117	VRAI	2.8784018268437	VRAI	-0.360621837260089	FAUX
8Q4D11	lo.EMS	1	23895	5.41734944	5.413448136	0.004330349	4.897213008	4.901556394	0.026162995	0.903951209	0.903075424	0.000710786	14304	5.432978087	5.433005347	0.004016592	4.814489489	4.837976479	0.060127921	0.886097427	0.889226969	0.001827225	0.059563758	0.677572707	0.348137939	1.346978345	5.50614707	5.4759478	0.032511618	-3.12081919642965	VRAI	-4.05017276533213	VRAI	-1.78865024299613	FAUX	-2.02380275006007	FAUX	1.36132180857383	FAUX	2.19978295974072	FAUX	1.69647098613796	FAUX	-2.61843329651471	VRAI	-3.40512670315341	VRAI	-1.75346309330196	FAUX
8Q4D12	lo.EMS	1	29424	5.418614089	5.415137013	0.004532305	4.906383286	4.912192819	0.027510353	0.905433462	0.904715455	0.000750372	15742	5.430476345	5.431916735	0.004350714	4.698638095	4.727939584	0.081432403	0.865175929	0.869722165	0.002561827	0.101003684	0.682187778	0.292184552	1.264083036	5.489885352	5.469559888	0.038846427	-8.37648768746513	VRAI	-9.19995496331627	VRAI	-0.720729367520712	FAUX	-0.720805071608759	FAUX	0.178102156690005	FAUX	1.97140867378575	FAUX	1.21085249844743	FAUX	-7.71607045459594	VRAI	-8.4829619936035	VRAI	-0.706672568190464	FAUX
8Q4D5	hi.EMS	1	34622	5.417836272	5.414075435	0.004386759	4.898215069	4.901262109	0.024960743	0.904056137	0.902929582	0.000670281	10812	5.447950499	5.454319579	0.003861622	4.931162193	4.994308349	0.13572669	0.905049051	0.915879317	0.004341605	0.065112838	0.599704033	0.270501909	1.603681321	5.52767705	5.509872269	0.041944026	1.63999922635973	FAUX	2.98674938291804	VRAI	1.86660646863531	FAUX	1.80892907548889	FAUX	5.02541341477393	VRAI	6.67118554732729	VRAI	4.27545913304478	VRAI	2.51534274802916	FAUX	3.80906710436952	VRAI	1.96106397660251	FAUX
9Q1B11	lo.EMS	1	42372	5.41903365	5.416237641	0.004458572	4.918554681	4.917794243	0.02157933	0.907604645	0.905696699	0.000540813	6553	5.436990096	5.440996404	0.004412647	4.987784628	5.063023568	0.158113351	0.917319898	0.931310526	0.005151577	0.108652526	0.607660613	0.220024326	1.317059451	5.499238711	5.500564405	0.045869727	2.82828933002363	VRAI	4.1540861278486	VRAI	2.57272751071516	FAUX	2.41321254446623	FAUX	-0.234818076509366	FAUX	3.63079799615528	VRAI	4.4868831307523	VRAI	3.12978775005989	VRAI	4.39415897673503	VRAI	2.53768934691278	FAUX
9Q1B5	hi.EMS	1	29757	5.418219612	5.414961655	0.004442253	4.922852514	4.922642431	0.02353295	0.908535811	0.906566611	0.000610012	12436	5.479994248	5.492474023	0.002935371	5.07559751	5.073963817	0.030447449	0.926206047	0.925671969	0.000943523	0.011981344	0.35453522	0.284241952	0.915444774	5.612275485	5.594651061	0.023961723	4.36024381875243	VRAI	3.16405714452014	VRAI	-3.00151241009212	VRAI	-3.98548991126759	VRAI	-4.66562678254599	VRAI	17.2426125991555	VRAI	16.4798297563855	VRAI	5.94438410717903	VRAI	4.75921810561406	VRAI	-3.123201027212	VRAI
9Q1D10	lo.EMS	1	24265	5.417317632	5.414754475	0.004514288	4.903639474	4.909363442	0.037195147	0.90515004	0.904548657	0.001093227	14717	5.426805083	5.425239048	0.004317626	3.718552177	3.738384124	0.059921394	0.685161477	0.687719147	0.001896133	0.122035741	0.692192702	0.289899591	1.07998083	5.477200153	5.460606212	0.041364918	-37.1953626644617	VRAI	-38.616169683869	VRAI	-1.73962824915687	FAUX	-1.98632106041803	FAUX	-2.85038488245545	VRAI	-0.535793479364834	FAUX	-0.606469064757293	FAUX	-37.5519089618418	VRAI	-39.8070033099224	VRAI	-1.81628376172334	FAUX
9Q1F10	lo.EMS	1	23536	5.419483273	5.416329235	0.004480327	4.913157778	4.914871818	0.023954785	0.906538699	0.904879878	0.000630617	15741	5.420324723	5.417229982	0.00442794	4.5178345	4.557651541	0.094477632	0.83344594	0.840350591	0.003037956	0.163267899	0.723333969	0.256463189	1.184646223	5.453832938	5.438577154	0.041074423	-11.6314149181892	VRAI	-11.816839052419	VRAI	-0.227101235697461	FAUX	-0.182699802657892	FAUX	-1.69566529404473	FAUX	-2.65356667192814	VRAI	-3.41444766702563	VRAI	-11.9331493517708	VRAI	-12.4693211813902	VRAI	-0.28401028857493	FAUX
9Q1F5	hi.EMS	1	39457	5.421004281	5.419307952	0.004404943	4.921190723	4.919663733	0.022334603	0.9077576	0.905623692	0.000561392	8991	5.453229827	5.461174261	0.00388927	5.067749605	5.128986978	0.138581551	0.929203336	0.940055076	0.004399884	0.061172283	0.478589701	0.292904325	1.748414786	5.561761864	5.560206819	0.047732133	4.87697050627113	VRAI	5.68947150147613	VRAI	1.57699002046637	FAUX	1.56495982834447	FAUX	4.52410405250771	VRAI	8.96626715547776	VRAI	12.0893245197408	VRAI	5.69284145966616	VRAI	6.59525558728662	VRAI	1.67162114172099	FAUX
9Q1G11	lo.EMS	1	30629	5.418150094	5.415120315	0.00438271	4.912406673	4.913734401	0.027902261	0.906615624	0.905025932	0.000756049	14024	5.448370851	5.453323692	0.003737103	4.758526355	4.824418733	0.14169003	0.873270447	0.885260722	0.004526997	0.065245294	0.602609812	0.28868751	1.777583913	5.521510163	5.509033073	0.040033185	-4.76574878316691	VRAI	-3.93142948130378	VRAI	1.74537150013692	FAUX	1.71322315732813	FAUX	4.84591206715626	VRAI	6.89040405551454	VRAI	5.56635909080988	VRAI	-4.21844505279047	VRAI	-3.5677140310388	VRAI	1.8094555875174	FAUX
9Q1H4	hi.EMS	1	26333	5.424084147	5.422758863	0.004404501	4.923392408	4.923031484	0.025071229	0.907646053	0.905839483	0.000651549	15766	5.420402123	5.417316382	0.004437378	5.007448782	5.060115873	0.123416891	0.923759762	0.93396543	0.00398696	0.142712165	0.706330077	0.244364011	1.288728223	5.463838526	5.445226561	0.042597415	3.93850912957943	VRAI	4.62023941989739	VRAI	1.03000620204117	FAUX	1.06792685528351	FAUX	-0.547381981326792	FAUX	-2.6307206117462	VRAI	-2.5668675038714	FAUX	3.76006721423042	VRAI	4.29713370758933	VRAI	0.99919822788081	FAUX
9Q2B10	lo.EMS	1	34231	5.416350548	5.412882037	0.004422843	4.867162683	4.865974061	0.023255795	0.898572536	0.896948829	0.000614747	12080	5.433400818	5.434680656	0.004060525	4.788617285	4.844868423	0.110301142	0.881231625	0.891080339	0.00348688	0.087086093	0.650496689	0.30495824	1.589422229	5.495858964	5.480392891	0.042843517	-3.39325746294833	VRAI	-2.909609625289	VRAI	0.367570335106642	FAUX	0.43011338868348	FAUX	2.77002073311093	VRAI	1.96077532367574	FAUX	1.91568014570608	FAUX	-3.25396444321057	VRAI	-2.88533961549795	VRAI	0.417626985282793	FAUX
9Q2E4	hi.EMS	1	25871	5.418209797	5.414578963	0.004471423	4.903737267	4.901959351	0.021217687	0.905008663	0.903004034	0.000532506	14385	5.413475642	5.407592282	0.004610808	4.986881854	5.010514082	0.068039661	0.921144573	0.925701854	0.002097713	0.186861314	0.710879388	0.327942429	1.259766802	5.452612502	5.42926605	0.043986477	3.48765572531801	VRAI	3.16930441189135	VRAI	-1.47260332903077	FAUX	-1.63470163970798	FAUX	-0.866898482228953	FAUX	-5.20198651238994	VRAI	-4.60130644217139	VRAI	3.10085185416592	VRAI	2.64199892836268	VRAI	-1.45630808462458	FAUX
9Q2F10	lo.EMS	1	25241	5.41735274	5.413877879	0.004494641	4.902294341	4.901512809	0.020327562	0.904891805	0.902898802	0.000509216	14800	5.420499092	5.416645499	0.004409528	4.719279324	4.763218284	0.093040618	0.870577675	0.878805636	0.002967383	0.135337838	0.705135135	0.273204288	1.254953848	5.468178184	5.447013759	0.039570541	-5.22997734297647	VRAI	-5.0648262404175	VRAI	-0.320586450937364	FAUX	-0.283059641677197	FAUX	-0.9199973347018	FAUX	-2.80811683157333	VRAI	-2.33905868235866	FAUX	-5.47639887419382	VRAI	-5.60987802556448	VRAI	-0.347729563593898	FAUX
9Q2H11	lo.EMS	1	26758	5.416742952	5.413090112	0.00443445	4.902891415	4.905828249	0.033032349	0.905098103	0.903983929	0.000935489	13550	5.431395776	5.432028365	0.004171986	2.741851972	2.812913357	0.107138954	0.504770391	0.517765663	0.003555931	0.11800738	0.686125461	0.162361247	0.8227818	5.47699452	5.467192108	0.045518568	-68.2944286292982	VRAI	-68.4569383375604	VRAI	0.459039418148747	FAUX	0.520787815182736	FAUX	-5.68792983928026	VRAI	1.25945125184539	FAUX	0.233015539839232	FAUX	-68.8573026168471	VRAI	-70.6885263907982	VRAI	0.277411004900083	FAUX
9Q2H12	lo.EMS	1	18641	5.416254994	5.412549581	0.004522605	4.903667396	4.902196048	0.024844048	0.905322217	0.903582064	0.000654529	10663	5.428863198	5.430184745	0.004272327	4.794897392	4.850866695	0.13602403	0.883158424	0.891991227	0.004406729	0.127731408	0.675701022	0.235247212	1.327394643	5.485053	5.465824358	0.044755735	-3.06108113134189	VRAI	-2.74967410977217	VRAI	1.5860573167173	FAUX	1.57299789628235	FAUX	-0.120795205049018	FAUX	0.771957577392789	FAUX	0.0586725092270068	FAUX	-3.05267317612155	VRAI	-2.68518658871591	VRAI	1.55821696892533	FAUX
9Q2H5	hi.EMS	1	26280	5.417811685	5.414557228	0.004480293	4.912938553	4.91414739	0.023726282	0.90677342	0.904983358	0.000615231	14726	5.43325826	5.434044081	0.004194197	5.013810127	5.041066842	0.082704477	0.922724277	0.926228985	0.002554596	0.100434605	0.65917425	0.327082231	1.452436191	5.492211587	5.478124762	0.042147603	3.75999356634037	VRAI	3.26185911480751	VRAI	-0.867388790971564	FAUX	-0.895643115183328	FAUX	1.25872404866266	FAUX	1.79245089357899	FAUX	1.62656847787244	FAUX	3.96396233822121	VRAI	3.66149710892969	VRAI	-0.806048975244603	FAUX
9Q3A11	lo.EMS	1	32220	5.417274121	5.413656778	0.004364533	4.858489766	4.862492147	0.034484306	0.896821956	0.896155142	0.001008696	12380	5.427299032	5.42662348	0.004586399	2.741458616	2.804139432	0.120134792	0.505057169	0.517072954	0.003984326	0.164943457	0.692891761	0.182466993	0.933862206	5.459814452	5.456612721	0.049142665	-68.2449886700572	VRAI	-68.5785655530009	VRAI	1.02651704815878	FAUX	1.06467572611772	FAUX	-4.46243670329389	VRAI	-0.16971921096362	FAUX	-1.11550750282175	FAUX	-68.8699105433772	VRAI	-70.981298650127	VRAI	0.853665220672476	FAUX
9Q3B4	hi.EMS	1	32561	5.415087885	5.411133799	0.004458316	4.856585099	4.853996155	0.024549099	0.896822671	0.895103098	0.000647846	13810	5.420746303	5.419032508	0.004404828	5.018740738	5.046116503	0.074199111	0.925776424	0.929420789	0.002291341	0.146705286	0.766256336	0.327823821	1.34547415	5.446718128	5.433895385	0.036691184	4.28617766441369	VRAI	3.82228237010205	VRAI	-1.21611210354125	FAUX	-1.31254204316705	FAUX	0.078666721031064	FAUX	-2.17693915484965	FAUX	-4.01121885773037	VRAI	4.12199928499824	VRAI	3.8299964589714	VRAI	-1.18318918076172	FAUX
9Q3E4	hi.EMS	1	40484	5.417577851	5.415105287	0.004420974	4.894019969	4.893245627	0.023430404	0.903319217	0.901639149	0.000607855	9894	5.472314259	5.483384721	0.003216718	5.010037828	5.083240961	0.162120174	0.915404956	0.928804085	0.005151816	0.045684253	0.404689711	0.284178694	2.017453658	5.590907317	5.584174556	0.046354657	2.4981571217346	FAUX	3.71400026279434	VRAI	2.57304410440456	FAUX	2.41347201641378	FAUX	7.49227191236875	VRAI	14.8392012507271	VRAI	15.1444207767297	VRAI	3.84305184329673	VRAI	5.0687820019317	VRAI	2.71535766238453	VRAI
9Q3F4	hi.EMS	1	32284	5.418950004	5.416883378	0.004383552	4.905054117	4.905563835	0.023999587	0.905126409	0.903408932	0.000625635	12218	5.417805927	5.412958398	0.004890215	5.113987719	5.156520379	0.12894646	0.943844739	0.952783416	0.004124615	0.170977247	0.652234408	0.275101796	1.412648727	5.478519962	5.45876321	0.050190809	7.40111938641454	VRAI	7.92433859773128	VRAI	1.21235224520001	FAUX	1.23636392429826	FAUX	0.819769369020017	FAUX	-3.78306742582176	VRAI	-0.841391056425673	FAUX	7.17487489554017	VRAI	7.51400244434049	VRAI	1.24438729900145	FAUX
9Q3G12	lo.EMS	1	29954	5.417771132	5.413949043	0.004409482	4.905264864	4.903358624	0.022549598	0.905366381	0.903421781	0.000583512	12728	5.436190307	5.438046068	0.004231463	4.781121119	4.852190162	0.151362531	0.879374647	0.891943031	0.004833122	0.086030798	0.587287869	0.290924048	1.739977111	5.521434111	5.505834806	0.048876349	-3.71339679243409	VRAI	-2.7581364587172	VRAI	2.15088297783115	FAUX	2.06196081528159	FAUX	4.43101551269643	VRAI	2.85066427146705	VRAI	5.15868549440184	VRAI	-3.49423308074329	VRAI	-2.64102454906577	VRAI	2.23834824363644	FAUX
9Q3H5	hi.EMS	1	30497	5.418183669	5.4148539	0.004426555	4.907785017	4.907301161	0.024709013	0.90576228	0.904050605	0.000654215	14453	5.424044663	5.422920441	0.004323133	5.002815694	5.049963823	0.111960556	0.922263651	0.930230164	0.003564064	0.116377223	0.661592749	0.283746095	1.443986455	5.485979858	5.466275806	0.047986121	3.68058255620253	VRAI	3.96439403242656	VRAI	0.469812876207015	FAUX	0.531409505670528	FAUX	1.16550244602558	FAUX	-1.14888416293399	FAUX	0.116217245095245	FAUX	3.61156653517273	VRAI	3.95837555598451	VRAI	0.491207797325212	FAUX
9Q4B6	hi.EMS	1	48325	5.41909759	5.416534001	0.004386318	4.876791463	4.876494961	0.021710618	0.899891862	0.89823447	0.000556976	7598	5.430760707	5.430034722	0.00424677	5.010199232	5.038411473	0.095526938	0.922474827	0.927194475	0.002971187	0.096341142	0.648328508	0.318194602	1.509128935	5.490879284	5.47957603	0.038970818	3.71698888037197	VRAI	3.4313817574116	VRAI	-0.315547445102659	FAUX	-0.277619850431175	FAUX	1.88418601026399	FAUX	0.732288196759958	FAUX	1.81155729991626	FAUX	3.84822519713819	VRAI	3.57289156677133	VRAI	-0.237482545913374	FAUX
9Q4C4	hi.EMS	1	27672	5.418828929	5.416427468	0.004399359	4.887014187	4.884551819	0.022791343	0.901816031	0.899914031	0.000582586	14059	5.412008794	5.405529056	0.004731178	5.132112701	5.168096587	0.102851043	0.94824947	0.95597684	0.003303398	0.232235579	0.726580838	0.247069038	1.151961636	5.438393327	5.415285594	0.046641071	8.16048628731762	VRAI	8.48504629582793	VRAI	0.124519107829244	FAUX	0.184714845888644	FAUX	-2.05625757546877	FAUX	-5.74754884300392	VRAI	-6.3833536499073	VRAI	7.75582050566204	VRAI	7.90028253798393	VRAI	0.087278841771641	FAUX
9Q4D5	hi.EMS	1	49693	5.418021402	5.415199623	0.004400484	4.891667253	4.892431329	0.023049292	0.902814597	0.901121043	0.00060027	6728	5.430646166	5.429970987	0.004460291	5.042245442	5.112393805	0.151112993	0.928424896	0.940559617	0.004905799	0.111474435	0.557669441	0.221691569	1.290382596	5.526818912	5.515422101	0.057600255	4.74276899195868	VRAI	5.77805980754052	VRAI	2.24715527726564	FAUX	2.14311804928891	FAUX	-0.52913013269868	FAUX	0.715435261045762	FAUX	6.38074951609694	VRAI	4.87537683902912	VRAI	6.04156715837433	VRAI	2.22728336852062	FAUX
9Q4E6	hi.EMS	1	29383	5.416796165	5.41410891	0.004412715	4.9005857	4.899886134	0.02286297	0.904664416	0.902895357	0.000591004	12744	5.459487574	5.466959509	0.003345899	5.063538744	5.09252766	0.077699429	0.927422862	0.933411602	0.002441489	0.039783427	0.531779661	0.287992611	1.387822253	5.554679226	5.538021719	0.035728621	4.57002031487045	VRAI	4.52299720495146	VRAI	-1.01721708564714	FAUX	-1.07199700629293	FAUX	0.545871617172186	FAUX	10.496013960752	VRAI	9.2614557071395	VRAI	5.5578740863036	VRAI	5.37866473376914	VRAI	-1.027980028105	FAUX
9Q4G2	hi.sham	1	26923	5.418081681	5.41454636	0.004444786	4.916201713	4.914966908	0.028397916	0.907330071	0.905467651	0.000774602	14217	5.411568591	5.405447109	0.004706391	5.114181324	5.151823217	0.10122093	0.945012321	0.951620128	0.003258719	0.196665963	0.710065415	0.249154298	1.155472319	5.454624948	5.425446179	0.04356141	7.60240821083769	VRAI	7.72008619131625	VRAI	0.065334633147658	FAUX	0.123934016856311	FAUX	-2.01752601088371	FAUX	-5.76921743205175	VRAI	-5.08821405444539	VRAI	7.18108036238408	VRAI	7.3572654388186	VRAI	0.0149972783637728	FAUX
9Q4G4	hi.EMS	1	29889	5.417265458	5.413543672	0.004371273	4.910924973	4.910669753	0.023131698	0.906496483	0.904519325	0.000603186	14312	5.428875904	5.428849657	0.004371144	4.977659577	5.02638616	0.119570094	0.916839816	0.925862518	0.003861775	0.082588038	0.647149245	0.234411342	1.226005368	5.502741319	5.480776343	0.038545726	2.74552414401808	VRAI	3.19751411458255	VRAI	0.864178666442467	FAUX	0.912205234457037	FAUX	-1.2393710641896	FAUX	0.418930947806562	FAUX	1.96455763338601	FAUX	2.80525755572865	VRAI	3.17162553632929	VRAI	0.828625696238712	FAUX
9Q4H4	hi.EMS	1	35672	5.418579959	5.415906079	0.004433353	4.912515232	4.910627073	0.021872937	0.906568942	0.904396172	0.000557676	12930	5.456056181	5.464604291	0.003706331	5.111127969	5.148735267	0.099391708	0.936713726	0.942251054	0.003119808	0.064037123	0.506341841	0.283925955	1.470307164	5.550613982	5.547417773	0.047807525	6.1717468680679	VRAI	6.0750456593239	VRAI	-0.11867518270529	FAUX	-0.0677495285287523	FAUX	1.45588532609711	FAUX	9.87324252360277	VRAI	10.4591428065043	VRAI	7.08321360679815	VRAI	7.25422534009492	VRAI	-0.0661130655081353	FAUX
10Q1A6	hi.EMS	1	34404	5.413957506	5.409466471	0.004477694	4.821690505	4.819247725	0.021291636	0.890563025	0.8891216	0.000534023	11255	5.422786311	5.421676301	0.004438838	5.015869077	5.073267315	0.115854407	0.924936778	0.936697843	0.003775654	0.203198578	0.747667703	0.213039948	1.088385338	5.436862543	5.430366961	0.048015062	7.27725665616933	VRAI	9.28619096909144	VRAI	1.6778242977066	FAUX	1.62759877067205	FAUX	-1.3719701406012	FAUX	0.112163518757575	FAUX	-0.225551064866964	FAUX	6.69623614879824	VRAI	7.84635187530709	VRAI	1.61849563315783	FAUX
10Q1B1	hi.sham	1	33564	5.411962039	5.407031252	0.004517038	4.834256528	4.83022286	0.019468471	0.893213483	0.891571288	0.000470266	12714	5.423541069	5.422895019	0.004280117	4.917857764	4.95223045	0.08441233	0.906701382	0.914257244	0.00266137	0.168868963	0.760893503	0.297058101	1.319217803	5.440023826	5.434783603	0.0439252	2.37210854806304	FAUX	3.04183291890332	VRAI	-0.241775649953806	FAUX	-0.197917848059944	FAUX	1.05783846850995	FAUX	0.289256321616723	FAUX	0.0761688140815036	FAUX	2.22425546110115	FAUX	2.20508146457493	FAUX	-0.197583998532187	FAUX
10Q1B10	lo.EMS	1	33047	5.413726016	5.409251575	0.004511157	4.822297415	4.820588932	0.021046984	0.890710978	0.889511148	0.000522521	12346	5.424585322	5.424005634	0.004258695	4.749326753	4.797509902	0.105178295	0.875462972	0.882801535	0.003388238	0.147254171	0.759355257	0.253838862	1.261487325	5.448291301	5.438547886	0.040161771	-6.03072666932123	VRAI	-5.7110844929057	VRAI	1.01041479229972	FAUX	1.02801604093109	FAUX	0.450150930049961	FAUX	0.450640598576058	FAUX	0.333323233907249	FAUX	-5.46534080489385	VRAI	-5.00611364829145	VRAI	1.0018484075677	FAUX
10Q1C3	hi.sham	1	34318	5.408354147	5.402820016	0.004433009	4.820761819	4.817545538	0.022625623	0.891312642	0.890205171	0.000580991	7168	5.475344374	5.485729942	0.003088229	5.009787124	5.062262256	0.114923668	0.914873201	0.923534795	0.003644219	0.062360491	0.441964286	0.304734684	1.858967856	5.565783336	5.56901497	0.040753966	4.57025014628429	VRAI	5.62341954557407	VRAI	1.4513985219432	FAUX	1.42778888612435	FAUX	6.73940204557266	VRAI	9.41984488394537	VRAI	9.24609288814708	VRAI	6.41873373068983	VRAI	7.33342952140228	VRAI	1.56473658472348	FAUX
10Q1F5	hi.EMS	1	37579	5.411865252	5.407261702	0.004428232	4.853508673	4.849081429	0.01928876	0.896791233	0.895133496	0.000473829	9600	5.469721294	5.481579488	0.003570336	5.039581046	5.09994638	0.142956884	0.921307954	0.932593548	0.004634925	0.082604167	0.4678125	0.212978386	1.347669866	5.551642062	5.56114493	0.048528749	6.30113750974386	VRAI	8.14412308027989	VRAI	3.15810810921795	VRAI	2.85609325732259	VRAI	1.35733302888027	FAUX	8.81673938127981	VRAI	8.70845648562238	VRAI	7.77814663636896	VRAI	9.08980625567706	VRAI	3.18392200267048	VRAI
10Q1G10	lo.EMS	1	31120	5.40973507	5.404066184	0.004426008	4.852379961	4.847001656	0.020704766	0.896934967	0.895217289	0.000521428	15128	5.418381471	5.415877743	0.004359183	4.799860794	4.82501045	0.072891714	0.885797264	0.890101519	0.00228596	0.184029614	0.799643046	0.299643389	1.225296674	5.426558722	5.418285544	0.038316102	-3.2509003988954	VRAI	-3.67977891783418	VRAI	-0.88850217241235	FAUX	-0.897310065553135	FAUX	0.0691977769952673	FAUX	-0.7304291800955	FAUX	-1.05088480818738	FAUX	-3.15961457282825	VRAI	-3.72437169544659	VRAI	-0.863009379372076	FAUX
10Q1G12	lo.EMS	1	33879	5.410243541	5.404063615	0.004473208	4.850564646	4.846837932	0.019264377	0.896515713	0.895135983	0.000472677	9565	5.43765922	5.440968872	0.003969642	4.732616525	4.791051717	0.117076577	0.870252164	0.880728325	0.003729644	0.127757449	0.733821223	0.281556562	1.529061602	5.458291935	5.461157741	0.044695387	-7.43238446731502	VRAI	-6.28797932326342	VRAI	1.59856192510513	FAUX	1.55805512687746	FAUX	3.26671437068771	VRAI	2.91558110407899	VRAI	1.87790002180236	FAUX	-6.22778153357805	VRAI	-5.30711589209157	VRAI	1.6890875995684	FAUX
10Q1G4	hi.EMS	1	34952	5.407932355	5.401876797	0.004416813	4.85444947	4.851527406	0.022777877	0.897610649	0.896166431	0.000582597	12537	5.463067924	5.471561594	0.003305596	5.035957037	5.072760748	0.084201812	0.921715764	0.926669812	0.002575779	0.076014996	0.63707426	0.364654025	1.840419697	5.504252487	5.509948116	0.041558463	6.41083452153164	VRAI	6.49577454115268	VRAI	-0.389225024727385	FAUX	-0.352793189105463	FAUX	6.54415881398752	VRAI	7.36103188602232	VRAI	5.21098113610846	VRAI	7.61279329333149	VRAI	7.82274186666922	VRAI	-0.209743419549574	FAUX
10Q1H12	lo.EMS	1	40606	5.413353245	5.408900235	0.004498128	4.857656988	4.855622114	0.021262928	0.897311104	0.895959474	0.00053965	7925	5.475790137	5.487911491	0.003392167	4.70168792	4.806034051	0.188973635	0.858503414	0.876559434	0.006092024	0.099305994	0.405678233	0.2649051	1.977207708	5.560138548	5.580863418	0.050377138	-10.5926864884564	VRAI	-7.44802180146137	VRAI	5.66828250294166	VRAI	4.70258237793497	VRAI	7.98402857732861	VRAI	9.73684736276694	VRAI	10.0555115134935	VRAI	-7.63896683478313	VRAI	-4.60882122395136	VRAI	5.84182797394748	VRAI
10Q1H7	lo.sham	1	32317	5.409460358	5.403676337	0.004470685	4.851594488	4.848989206	0.023436763	0.896832272	0.895470281	0.000608921	15060	5.426687135	5.427096433	0.004294451	4.921929614	4.973571162	0.11087401	0.906932997	0.914653983	0.003570212	0.16122178	0.77815405	0.249845964	1.269501989	5.43500417	5.436630097	0.045157006	2.43441078043897	FAUX	3.15223016669844	VRAI	1.32390514204499	FAUX	1.31369441237486	FAUX	0.534515577745135	FAUX	0.899766859108832	FAUX	0.202310789401043	FAUX	2.41004253002042	FAUX	3.19972658488233	VRAI	1.33083023658018	FAUX
10Q2A5	hi.EMS	1	31842	5.413326892	5.408325628	0.004469961	4.808994689	4.80610193	0.020348169	0.888327416	0.886736353	0.000512435	12580	5.420184345	5.417324689	0.004450135	4.919498295	4.960032929	0.093675246	0.9075925	0.915922757	0.003013286	0.201510334	0.757790143	0.245379508	1.125807395	5.43198417	5.425356488	0.047387716	2.61181081566391	VRAI	3.50528131033188	VRAI	0.364477275854032	FAUX	0.414101942314744	FAUX	-0.978054855464648	FAUX	-0.520172399834867	FAUX	-0.567838102628799	FAUX	2.29910827885262	FAUX	2.56873838772026	FAUX	0.337437688414753	FAUX
10Q2B5	hi.EMS	1	32884	5.41163034	5.40574239	0.004467358	4.80862887	4.805269717	0.020044304	0.888535629	0.887074995	0.000499721	12169	5.433498832	5.43466629	0.004015768	4.9604868	4.988536662	0.0683951	0.912884043	0.916740159	0.002105119	0.112416797	0.715670967	0.329704535	1.360670848	5.470633569	5.461761065	0.041533469	4.03518556087993	VRAI	3.73273293757855	VRAI	-1.2000406797721	FAUX	-1.25473969271068	FAUX	1.49418508732231	FAUX	1.999748309594	FAUX	1.9191156884212	FAUX	4.1692985371708	VRAI	3.89723665614707	VRAI	-1.12273169660233	FAUX
10Q2D10	lo.EMS	1	32046	5.411693945	5.406155106	0.004438041	4.832063787	4.831293744	0.021358182	0.892860452	0.891785025	0.000552422	13201	5.419703906	5.416803545	0.004324489	4.76498332	4.809054427	0.10513727	0.879165748	0.886405334	0.003423392	0.15710931	0.765926824	0.220382715	1.086646957	5.443063351	5.429892717	0.041879257	-5.03471513816822	VRAI	-4.70828544565613	VRAI	1.07097531058774	FAUX	1.08379081357038	FAUX	-1.39026883666943	FAUX	-0.595900215172995	FAUX	-0.25794871952674	FAUX	-4.75097566564064	VRAI	-4.46804793344943	VRAI	0.999478822794716	FAUX
10Q2D4	hi.EMS	1	33328	5.413407974	5.408978994	0.004494188	4.838202834	4.833535953	0.020618909	0.893702014	0.891869138	0.000505846	12420	5.409698832	5.401991262	0.004467806	5.130960952	5.161323073	0.085404243	0.948440297	0.954656108	0.002722882	0.253059581	0.798550725	0.268508501	1.17395267	5.410303828	5.391821327	0.043042203	13.5994797522123	VRAI	14.2832873754824	VRAI	-0.135807663353903	FAUX	-0.088145896914578	FAUX	-0.471263907826395	FAUX	-2.74828387834341	VRAI	-2.85876970121388	VRAI	11.9475548645352	VRAI	11.9504431544392	VRAI	-0.140291568528006	FAUX
10Q2D6	hi.EMS	1	42462	5.414753932	5.410692053	0.004425367	4.831203184	4.829866382	0.019933166	0.89218805	0.891056693	0.000488271	8520	5.432777728	5.434456322	0.004478691	4.987129505	5.022714919	0.084296885	0.917935702	0.925850916	0.002672044	0.177347418	0.693075117	0.264188365	1.14615641	5.462156476	5.461361194	0.044692652	5.39403379135695	VRAI	6.26790719100456	VRAI	-0.223387330780842	FAUX	-0.178779171338514	FAUX	-0.763855298075996	FAUX	1.96923770613141	FAUX	1.8917987744139	FAUX	5.38493026968328	VRAI	5.49021239874007	VRAI	-0.204252047627049	FAUX
10Q2E5	hi.EMS	1	37766	5.411496872	5.40663299	0.004390702	4.83598297	4.834039018	0.022174483	0.893611695	0.892545657	0.000572008	10565	5.44690315	5.451611455	0.003809667	4.966938014	5.020734085	0.107966492	0.911768928	0.920023177	0.003366823	0.099100805	0.673166115	0.336656884	1.792208387	5.490944783	5.487652999	0.047380618	3.73523023045709	VRAI	4.64627093525911	VRAI	0.973522731676801	FAUX	0.993897446941627	FAUX	6.03667276303482	VRAI	4.46206261426457	VRAI	3.68790545952376	VRAI	4.46364929666121	VRAI	5.39788994613215	VRAI	1.16289335955478	FAUX
10Q2G10	lo.EMS	1	29854	5.412778308	5.40785215	0.004466762	4.84968489	4.84659996	0.021406049	0.895931445	0.894537653	0.000542638	14190	5.420895896	5.419648496	0.004314453	4.912794803	4.950832005	0.097777416	0.906234936	0.91305795	0.003155215	0.182241015	0.765961945	0.240327402	1.144088702	5.436040308	5.428037553	0.043530822	2.2466390098949	FAUX	2.70811539454303	VRAI	0.608981281091021	FAUX	0.650746873882632	FAUX	-0.785620584425678	FAUX	-0.182498307113253	FAUX	-0.38468297996932	FAUX	1.99324678341346	FAUX	2.13990292248746	FAUX	0.574377105067471	FAUX
10Q2G6	hi.EMS	1	39326	5.413593343	5.408801132	0.004428857	4.849556954	4.84710974	0.021365409	0.895770837	0.89437382	0.000536984	10576	5.427678163	5.426493369	0.004407189	4.976008233	5.040892952	0.142661251	0.916749939	0.928055575	0.004671006	0.165185325	0.70868003	0.200671195	1.141713707	5.46030731	5.452284131	0.052201963	5.07507482078608	VRAI	6.88137923667365	VRAI	3.22026558945776	VRAI	2.90506962885343	VRAI	-0.810620461707218	FAUX	0.81213518872784	FAUX	1.27170542078283	FAUX	4.87749789188595	VRAI	6.33745178888961	VRAI	3.16684637914359	VRAI
10Q2H10	lo.EMS	1	40042	5.411848922	5.406717268	0.00446952	4.847595221	4.846002911	0.020914043	0.895696669	0.894501067	0.000522076	10097	5.433905393	5.43800726	0.00421426	4.73661928	4.829220123	0.184998779	0.871553134	0.889216128	0.005979425	0.161632168	0.708032089	0.263958679	1.74887887	5.459020854	5.460210543	0.058026946	-7.08243590934552	VRAI	-3.92614927623744	VRAI	5.47430589149735	VRAI	4.56838417688396	VRAI	5.58057386275566	VRAI	2.48522710088787	FAUX	1.81319283795084	FAUX	-6.04514707527237	VRAI	-3.52816780555107	VRAI	5.61224215426703	VRAI
10Q3B11	lo.EMS	1	35876	5.410964361	5.405819164	0.004346694	4.815781741	4.814733574	0.02037501	0.889968032	0.888941525	0.000514875	13164	5.423033476	5.420061419	0.004243714	4.818289926	4.850192715	0.083480488	0.888429782	0.893955974	0.002644894	0.128152537	0.73928897	0.288119599	1.277886422	5.459102781	5.443556329	0.037367804	-2.54277809174859	FAUX	-2.6072319190514	VRAI	-0.270159193769973	FAUX	-0.227535117684011	FAUX	0.622772519791459	FAUX	-0.122496164341135	FAUX	0.675471593606815	FAUX	-2.31874508672083	FAUX	-2.55067997417043	FAUX	-0.251406755729597	FAUX
10Q3C12	lo.EMS	1	33725	5.411345288	5.406460127	0.004373385	4.846244866	4.843793198	0.021153389	0.895530155	0.894240857	0.000532222	12894	5.422305712	5.420404673	0.004260898	4.927802493	4.968263411	0.099357941	0.908765335	0.915743076	0.003214121	0.185745308	0.78036296	0.240909304	1.163333633	5.429645643	5.425909827	0.042434803	2.92729227717814	VRAI	3.45528297923494	VRAI	0.71045985793219	FAUX	0.747397402944547	FAUX	-0.583042931297249	FAUX	-0.0726176748524353	FAUX	-0.530037127114512	FAUX	2.6780054892472	VRAI	2.95234361884273	VRAI	0.665667488329266	FAUX
10Q3D10	lo.EMS	1	31062	5.414447505	5.410101231	0.004497254	4.833145287	4.83356781	0.020447632	0.892606817	0.891901682	0.000520588	13300	5.419734172	5.417986231	0.004432236	4.69474877	4.739556523	0.102981764	0.866179711	0.873440156	0.003320207	0.183233083	0.76556391	0.252012417	1.214760481	5.438845968	5.426457581	0.040906657	-8.52783559589495	VRAI	-8.3159972369689	VRAI	0.893216390420767	FAUX	0.919251170892003	FAUX	-0.0417092068150771	FAUX	-0.424043248555343	FAUX	-0.492617687057194	FAUX	-7.9555807422923	VRAI	-7.70719717482401	VRAI	0.874977806446921	FAUX
10Q3E11	lo.EMS	1	30256	5.414647178	5.410373109	0.004473984	4.850529063	4.847770021	0.022052169	0.895771065	0.894235789	0.000551983	14561	5.427083694	5.426150012	0.004338611	4.943482351	4.971442853	0.076617723	0.910855262	0.914987933	0.002426303	0.145663073	0.736487879	0.274911436	1.155266142	5.456708426	5.446341411	0.042570306	3.48946276528436	VRAI	3.2451556439043	VRAI	-0.646730401970967	FAUX	-0.629571271692492	FAUX	-0.667963651117688	FAUX	0.762241732233949	FAUX	0.865732566513737	FAUX	3.39343333135594	VRAI	3.10053063671734	VRAI	-0.647796845785516	FAUX
10Q3E5	hi.EMS	1	43587	5.413801216	5.409551892	0.004432999	4.848570674	4.846522668	0.019742175	0.895555414	0.894274405	0.000484687	7740	5.448016083	5.453367272	0.004047298	5.138756237	5.172597094	0.081176945	0.943135875	0.947221574	0.002459452	0.089793282	0.642894057	0.370745672	1.660388963	5.502853247	5.499238123	0.036520449	12.1726406784737	VRAI	12.2145416957304	VRAI	-0.589623938389874	FAUX	-0.567470896050375	FAUX	4.64910376885858	VRAI	4.71720166516696	VRAI	4.47933528582235	VRAI	12.3032318053705	VRAI	12.4759012541453	VRAI	-0.384458319817495	FAUX
10Q3F12	lo.EMS	1	39121	5.412335517	5.408284919	0.004409161	4.854368908	4.851371495	0.021340802	0.896867117	0.895473873	0.000536262	11479	5.444041066	5.448823764	0.003880554	4.924732917	4.979097458	0.116689	0.904498851	0.913503073	0.003674361	0.099747365	0.712431396	0.318525094	1.74667354	5.477283145	5.476598339	0.04065637	1.77964865480408	FAUX	2.83197605389414	VRAI	1.50332476482417	FAUX	1.47392560582565	FAUX	5.55735992783567	VRAI	4.05698119863354	VRAI	2.93271391875214	VRAI	2.53794936540548	FAUX	3.45729546776565	VRAI	1.66670133369253	FAUX
10Q3F6	hi.EMS	1	35410	5.413916084	5.40940049	0.004382811	4.850620224	4.849032246	0.021316112	0.895918761	0.894698083	0.000546246	12035	5.428504903	5.427891651	0.004160901	4.930301407	4.96615347	0.083894889	0.908162346	0.913516823	0.002639273	0.105442459	0.74175322	0.299830923	1.346326825	5.467837827	5.452169919	0.037075189	2.76509397051352	VRAI	2.83580215154823	VRAI	-0.279842605993247	FAUX	-0.237660525369628	FAUX	1.34319579482964	FAUX	1.01532056759927	FAUX	1.26390310607986	FAUX	2.79202391024536	VRAI	2.85400376402504	VRAI	-0.227471148185223	FAUX
10Q3H6	hi.EMS	1	34992	5.414214597	5.410259989	0.004417763	4.86326617	4.858127972	0.01911474	0.898199111	0.896276432	0.00045672	12460	5.409160229	5.40108332	0.004796204	5.087372388	5.14399632	0.146045095	0.940467139	0.950947293	0.004781423	0.306019262	0.808426966	0.218867251	1.207745537	5.393857994	5.377521159	0.042879605	11.4547760737547	VRAI	13.2512664030517	VRAI	3.41048322465742	VRAI	3.05378599958937	VRAI	-0.115550515591259	FAUX	-2.88021759361926	VRAI	-3.83567590232843	VRAI	9.9587312232026	VRAI	11.1428801114526	VRAI	3.36229562269123	VRAI
10Q4A4	hi.EMS	1	37275	5.415205082	5.411031832	0.004482136	4.827534571	4.82815701	0.021306294	0.891441652	0.890316765	0.000542741	10689	5.424853897	5.42407352	0.004280642	4.939811748	4.992244143	0.106388437	0.910526783	0.920979757	0.003397776	0.149686594	0.74618767	0.268302458	1.337572689	5.45511751	5.441082136	0.042963481	3.40110503807062	VRAI	4.9124504620912	VRAI	1.02684610092551	FAUX	1.04317736702452	FAUX	1.25104725316706	FAUX	0.460505162827103	FAUX	0.50644879020663	FAUX	3.22595403508121	VRAI	4.07003444683384	VRAI	1.07174564233538	FAUX
10Q4A5	hi.EMS	1	41686	5.414162329	5.410363824	0.004419003	4.828863408	4.828389184	0.018815212	0.891860812	0.890721703	0.000462783	8613	5.432263479	5.43514492	0.004469834	4.999616194	5.027308827	0.076563163	0.92029432	0.924686803	0.002362063	0.160106815	0.745384883	0.320649106	1.327071343	5.448456614	5.451674395	0.038959579	6.02847960325188	VRAI	5.94397918966738	VRAI	-0.75739797023696	FAUX	-0.751136333041559	FAUX	1.14050707885468	FAUX	2.0692983845354	FAUX	1.23005172276738	FAUX	5.95466278679869	VRAI	5.70432466337963	VRAI	-0.650948205815103	FAUX
10Q4B12	lo.EMS	1	39819	5.41168632	5.407061021	0.004317847	4.841519448	4.840538918	0.019958345	0.894606041	0.893636956	0.00050209	10632	5.429782156	5.429453499	0.004117863	4.742835071	4.796046754	0.111885636	0.873413363	0.882513749	0.003582928	0.133559067	0.782072987	0.266158514	1.38736771	5.442890035	5.442369221	0.037696361	-6.5820519988456	VRAI	-5.79116429941316	VRAI	1.34581125658531	FAUX	1.33338186233674	FAUX	1.77520389948919	FAUX	1.24227384141634	FAUX	0.594375122111335	FAUX	-5.76153800546263	VRAI	-5.0743078593603	VRAI	1.38926128022555	FAUX
10Q4B5	hi.EMS	1	41263	5.414810057	5.41126017	0.004445555	4.825448207	4.824070486	0.019924502	0.891119231	0.88974041	0.000493059	9122	5.449625836	5.456963915	0.004077836	5.024711235	5.071399599	0.105006172	0.921962383	0.930814313	0.00333557	0.101183951	0.636263977	0.276090692	1.40101986	5.502893693	5.501361244	0.040156165	6.47717268722176	VRAI	7.64903021776641	VRAI	0.919682546262462	FAUX	0.94390952457606	FAUX	1.91891033871504	FAUX	5.2398324868611	VRAI	4.62437484554059	VRAI	7.09967896170666	VRAI	7.75930161168329	VRAI	0.99190666375588	FAUX
10Q4D11	lo.EMS	1	34486	5.411508467	5.40575604	0.004421313	4.84701107	4.846163855	0.019515902	0.89565423	0.894306544	0.000489315	13992	5.425986299	5.425286354	0.00427783	4.808317726	4.833612406	0.067363333	0.886129003	0.889531662	0.002125626	0.135005718	0.733276158	0.285538817	1.133092038	5.463517856	5.44807838	0.038393927	-3.16166576268378	VRAI	-3.83834826553324	VRAI	-1.16471284941048	FAUX	-1.2134556592845	FAUX	-0.901374617805265	FAUX	0.636742957347815	FAUX	0.984392416331176	FAUX	-2.77374853937178	VRAI	-3.32345285260294	VRAI	-1.1823260749683	FAUX
10Q4F4	hi.EMS	1	46069	5.414051055	5.409760723	0.004454179	4.856087599	4.856414683	0.020934424	0.896905517	0.895818184	0.000529449	7094	5.483983372	5.501133237	0.003302756	4.898312344	5.0820921	0.314663605	0.892861617	0.924462964	0.00993762	0.100648435	0.327177897	0.405409292	3.957115222	5.591796771	5.613027417	0.055514081	-1.35065662283784	FAUX	5.88169338073708	VRAI	12.2931697671607	VRAI	8.70924695164734	VRAI	28.8251018759266	VRAI	11.6581089325729	VRAI	12.2527731173951	VRAI	1.33245289160666	FAUX	8.25765630310743	VRAI	13.1016217345419	VRAI
10Q4G5	hi.EMS	1	43870	5.416932055	5.413632484	0.004466941	4.858819858	4.859156317	0.022934261	0.896926774	0.895991098	0.000586293	8042	5.443649096	5.449930969	0.004102206	5.064092182	5.126744885	0.118002173	0.930176335	0.940678421	0.003721085	0.131061925	0.641134046	0.305483581	1.638415937	5.49078058	5.491438039	0.058063208	8.68664766176444	VRAI	10.3938331616506	VRAI	1.58381715989983	FAUX	1.54507105672303	FAUX	4.41780940676344	VRAI	4.2178699660019	VRAI	3.94647787961469	VRAI	8.8965208675714	VRAI	10.3388274799822	VRAI	1.7425495907331	FAUX
10Q4H4	hi.EMS	1	34555	5.413318531	5.408489274	0.004435286	4.862553831	4.861110065	0.021947333	0.898225802	0.896889085	0.000571323	13165	5.43530638	5.43793597	0.004074017	4.912606407	4.974281359	0.128877281	0.903767185	0.914033931	0.004159199	0.11272313	0.715913407	0.244451205	1.374893157	5.474605076	5.463882542	0.04154841	1.58283745883849	FAUX	2.97969347559962	VRAI	2.33856515185636	FAUX	2.19157522271042	FAUX	1.6438931834068	FAUX	2.47486789891018	FAUX	2.06404293940329	FAUX	1.98465080354288	FAUX	3.23282735399009	VRAI	2.37069073202059	FAUX
10Q4H6	hi.EMS	1	31948	5.412611608	5.408045677	0.004509299	4.865788758	4.862414652	0.021283492	0.89893195	0.896891762	0.000529363	13870	5.408286439	5.399986785	0.004678313	5.117155587	5.15615223	0.105904507	0.946137112	0.95269761	0.003428214	0.291204037	0.80778659	0.241737024	1.150153374	5.397737006	5.379925237	0.044275629	12.9799448901579	VRAI	13.7383124952407	VRAI	1.0792822690899	FAUX	1.09141894525159	FAUX	-0.72178211076455	FAUX	-3.03955589549301	VRAI	-3.67144295722152	VRAI	11.3176548685356	VRAI	11.7094411785995	VRAI	1.04379407233688	FAUX
10Q1A1	hi.sham	1	34649	5.412323784	5.407712045	0.004505919	4.830488507	4.827853706	0.019647277	0.892465891	0.891071436	0.000492237	11784	5.432604651	5.43411761	0.004227767	4.842222866	4.886699362	0.096174481	0.891258489	0.897787023	0.003042595	0.135353021	0.737355737	0.285553307	1.361951312	5.454617211	5.455818264	0.046552223	-1.78188280932987	FAUX	-1.54119791239164	FAUX	0.414968492515115	FAUX	0.463419407341376	FAUX	1.50766361795645	FAUX	1.92001921798081	FAUX	1.5131373006925	FAUX	-1.22675231360276	FAUX	-0.849182934271542	FAUX	0.48179233070848	FAUX
10Q1A10	lo.EMS	1	28901	5.413567488	5.409666043	0.004519307	4.817907474	4.814587172	0.023626174	0.889926219	0.888457891	0.000609228	13681	5.425830291	5.42559046	0.004393889	4.868146881	4.916090568	0.105524715	0.897167999	0.904639598	0.003391197	0.16226884	0.75623127	0.250133122	1.225811704	5.440419298	5.439130502	0.046412072	-0.192280817887793	FAUX	0.365610897202433	FAUX	1.01551232241334	FAUX	1.0327218615033	FAUX	0.0746191302176172	FAUX	0.680932822358602	FAUX	0.37312424766237	FAUX	-0.0439123854449704	FAUX	0.520678559939638	FAUX	1.02185746441245	FAUX
10Q1A3	hi.sham	1	30669	5.410955558	5.405399299	0.004445911	4.81820296	4.813687714	0.019324104	0.890416266	0.889052405	0.000475072	11350	5.420889149	5.418627718	0.004159318	4.843068331	4.889609802	0.102040772	0.893360269	0.900701168	0.003288911	0.171629956	0.774361233	0.248908751	1.232866228	5.43077793	5.42722961	0.046396553	-1.21652397694393	FAUX	-0.730303123435012	FAUX	0.83930212802269	FAUX	0.868842477970128	FAUX	0.148877069404729	FAUX	-0.330828303976252	FAUX	-0.439877053692577	FAUX	-1.18817612238164	FAUX	-0.713533526512914	FAUX	0.820626549537804	FAUX
10Q1A4	hi.EMS	1	36108	5.413664665	5.408965445	0.004446076	4.821421261	4.818549184	0.019666013	0.890560977	0.889217173	0.000478436	10186	5.430997047	5.431611402	0.004311345	4.877905237	4.92426119	0.118162978	0.898096642	0.906449144	0.00379659	0.134792853	0.715982721	0.254245881	1.331031304	5.464973609	5.457273893	0.044907911	0.0575153178558951	FAUX	0.869138148515346	FAUX	1.71389117518507	FAUX	1.65910300751792	FAUX	1.18219076199494	FAUX	1.5558403027043	FAUX	1.61257760073805	FAUX	0.401333966633514	FAUX	0.901493843992772	FAUX	1.75183761216928	FAUX
10Q1A7	lo.sham	1	29367	5.41345448	5.408514705	0.004565441	4.823565572	4.820851429	0.020929801	0.890992715	0.889532184	0.000521259	14050	5.42441092	5.423132779	0.004300188	4.891828207	4.925585374	0.080358071	0.901788847	0.906669522	0.002568406	0.174234875	0.75480427	0.253979029	1.097915442	5.437505147	5.436203211	0.045446583	1.05068335053753	FAUX	0.930460893883424	FAUX	-0.401926643357914	FAUX	-0.366254061123402	FAUX	-1.27165353762716	FAUX	0.323805400901503	FAUX	0.173148364136564	FAUX	1.03659994817774	FAUX	0.963211239081967	FAUX	-0.431756098279157	FAUX
10Q1A8	lo.sham	1	30946	5.412716893	5.40779951	0.004506849	4.818574364	4.813537624	0.02003636	0.890191932	0.888654465	0.000491665	12832	5.423370798	5.422087304	0.004245179	4.864267342	4.905148002	0.095594381	0.896857473	0.903422295	0.003063186	0.162640274	0.761377805	0.263312462	1.249509599	5.437838768	5.43487057	0.04700176	-0.275809358831898	FAUX	0.0268821588310489	FAUX	0.450441031403114	FAUX	0.497925404601652	FAUX	0.32406995720078	FAUX	0.171886664927142	FAUX	0.082109905234619	FAUX	-0.22092484404932	FAUX	0.0106688716245325	FAUX	0.448286026581581	FAUX
10Q1A9	lo.sham	1	29258	5.412907146	5.408423145	0.004502208	4.816298056	4.814667033	0.023576605	0.889740804	0.888399958	0.000615161	13488	5.425366346	5.424519029	0.004297736	4.857610561	4.909390196	0.110845153	0.895296532	0.903536517	0.003573557	0.154581851	0.756524318	0.250628215	1.272824236	5.444277992	5.439317691	0.045110895	-0.695687643515992	FAUX	0.0586657607397399	FAUX	1.32966764229171	FAUX	1.31887667683047	FAUX	0.56948650075717	FAUX	0.525242401063394	FAUX	0.385911936232214	FAUX	-0.524655047870036	FAUX	0.208388496044653	FAUX	1.32916346978447	FAUX
10Q1B12	lo.EMS	1	28890	5.410502004	5.405460768	0.004517648	4.831180729	4.826780767	0.018721885	0.892893541	0.891234747	0.00045826	10640	5.421764119	5.419242623	0.004285464	4.806489047	4.858416875	0.113151426	0.886457595	0.894658117	0.00365126	0.150281955	0.774342105	0.252028843	1.295034485	5.438171683	5.431538251	0.044517409	-3.07327763954464	VRAI	-2.41185245104197	FAUX	1.46352819735044	FAUX	1.4385831897058	FAUX	0.803277940062306	FAUX	-0.241476009235345	FAUX	-0.14553518922804	FAUX	-2.85718602145099	VRAI	-2.16736939799909	FAUX	1.46237271739291	FAUX
10Q1B3	hi.sham	1	31293	5.413528249	5.408833322	0.004492488	4.826642292	4.825478048	0.021880729	0.891548824	0.890170819	0.000554695	13049	5.425666973	5.424969793	0.004142447	4.872847406	4.908029034	0.0822246	0.898066323	0.903377676	0.002615917	0.13640892	0.744271592	0.27120079	1.208268192	5.455716162	5.443457007	0.043057944	0.0493597951850737	FAUX	0.0144664023781202	FAUX	-0.320078467207764	FAUX	-0.279848868219599	FAUX	-0.110048899436032	FAUX	0.590743247188557	FAUX	0.668686479074823	FAUX	0.170559356424621	FAUX	0.144947635156407	FAUX	-0.323946258017691	FAUX
10Q1B8	lo.sham	1	31728	5.411737079	5.407036355	0.004468783	4.824827579	4.823405754	0.022362614	0.891505136	0.890148773	0.00056761	13098	5.421996564	5.420136529	0.004267241	4.87013356	4.902103561	0.081335723	0.898178692	0.903042851	0.002589438	0.158879218	0.766300199	0.267379354	1.167333495	5.443474119	5.432109467	0.042276663	0.0795859875726588	FAUX	-0.0787025537693418	FAUX	-0.365694384706445	FAUX	-0.32790678563456	FAUX	-0.540939238808167	FAUX	-0.11158187537293	FAUX	-0.106512958679712	FAUX	0.0467341924725462	FAUX	-0.131226037257324	FAUX	-0.375287376951333	FAUX
10Q1B9	lo.sham	1	32343	5.413870203	5.40983003	0.004437604	4.825560555	4.822984883	0.019141192	0.891293068	0.889779286	0.000462978	12533	5.426217182	5.425234154	0.004242907	4.843599659	4.889480987	0.104003892	0.892570753	0.900011777	0.003336477	0.154631772	0.760312774	0.26199057	1.297115692	5.442287884	5.43907836	0.04393315	-1.42889627276463	FAUX	-0.922134198914643	FAUX	0.921245053803204	FAUX	0.945363526156706	FAUX	0.82518532075047	FAUX	0.6291577372155	FAUX	0.369562202577384	FAUX	-1.16393311938429	FAUX	-0.719537319224818	FAUX	0.93401544069036	FAUX
10Q1C1	hi.sham	1	31360	5.40980437	5.403430253	0.004516078	4.830312984	4.82549103	0.019985635	0.89284311	0.89130036	0.000493738	13175	5.420116148	5.417033855	0.00428694	4.870603067	4.912134338	0.099632844	0.898577327	0.90569696	0.00321491	0.182694497	0.791119545	0.241269309	1.163133713	5.42439682	5.421256682	0.045573791	0.186815011613328	FAUX	0.659834189399878	FAUX	0.711819084447786	FAUX	0.748685923594959	FAUX	-0.585147346450176	FAUX	-0.562433700830477	FAUX	-0.847913546831046	FAUX	0.068156477027991	FAUX	0.336287108318259	FAUX	0.681545756771598	FAUX
10Q1C11	lo.EMS	1	24649	5.416721819	5.413380244	0.004529851	4.844704611	4.844738047	0.021874338	0.894362868	0.892948309	0.000560695	11238	5.432005791	5.431889425	0.004277677	4.863105441	4.899519564	0.083667581	0.895217097	0.901796596	0.002635334	0.098327104	0.643174942	0.283101277	1.252034936	5.501141236	5.482650665	0.042833722	-0.71705490310102	FAUX	-0.425487523361183	FAUX	-0.286628402247913	FAUX	-0.244762483322627	FAUX	0.350652377414102	FAUX	1.59624002793136	FAUX	3.346174431983	VRAI	-0.273939120401423	FAUX	-0.251660632267014	FAUX	-0.24060035173371	FAUX
10Q1C12	lo.EMS	1	34381	5.41274577	5.407594831	0.004458127	4.832968372	4.829516043	0.019793163	0.89284845	0.891274299	0.000488514	11716	5.436328885	5.437044657	0.003972428	4.869344644	4.917544892	0.101577696	0.895632018	0.902989676	0.003227171	0.103789689	0.739501536	0.28356984	1.433940751	5.467912537	5.460267734	0.036932653	-0.60544509993777	FAUX	-0.0934991168788584	FAUX	0.73294136113691	FAUX	0.768689154009511	FAUX	2.26544506194563	FAUX	2.34535055577203	FAUX	1.81709980201927	FAUX	0.010738173153668	FAUX	0.588461503167825	FAUX	0.793879496805744	FAUX
10Q1C2	hi.sham	1	29039	5.4092267	5.403419961	0.004417131	4.827219494	4.823901141	0.022357338	0.892362503	0.891027062	0.000570234	14205	5.420156062	5.417816999	0.004345307	4.888328755	4.912333672	0.071982976	0.901856056	0.904910552	0.002291046	0.189440338	0.795494544	0.261300327	1.063517413	5.424111908	5.420216577	0.040756149	1.06876193238998	FAUX	0.441007003657996	FAUX	-0.87974041568444	FAUX	-0.887466037989905	FAUX	-1.63373703831955	FAUX	-0.44863447410012	FAUX	-0.918967608874977	FAUX	0.876929790901897	FAUX	0.345577641380645	FAUX	-0.915497660357543	FAUX
10Q1C5	hi.EMS	1	31166	5.411167051	5.405815752	0.004451459	4.821806207	4.820903909	0.023409306	0.891045853	0.889833458	0.000613292	11938	5.418105803	5.414505394	0.004354864	4.866155038	4.89020857	0.072574123	0.898084521	0.901887648	0.002285857	0.178421846	0.781873011	0.292636631	1.194626922	5.436251694	5.421110953	0.041852271	0.054254884124817	FAUX	-0.400151243826668	FAUX	-0.888679612629214	FAUX	-0.897509536635708	FAUX	-0.253640812667169	FAUX	-0.929846215792778	FAUX	-0.857868923843539	FAUX	-0.134794582165752	FAUX	-0.685626225697608	FAUX	-0.881353286687997	FAUX
10Q1C6	hi.EMS	1	29168	5.408322438	5.401747665	0.004427708	4.823086922	4.817082552	0.021882598	0.891745896	0.890057018	0.000550143	15202	5.417867207	5.414075435	0.004409505	4.904983442	4.923694663	0.061820927	0.905309014	0.908077487	0.001937877	0.202670701	0.780292067	0.287776478	1.077526976	5.427135777	5.41729063	0.043915702	1.99757479727487	FAUX	1.32224355450374	FAUX	-1.48815191034404	FAUX	-1.59922744623047	FAUX	-1.48626836753581	FAUX	-0.992323872169775	FAUX	-1.11885167795949	FAUX	1.63683633989017	FAUX	0.875089227498602	FAUX	-1.50245284799149	FAUX
10Q1C7	lo.sham	1	29737	5.413682243	5.409443633	0.004491858	4.82766358	4.821811471	0.019711378	0.891708962	0.890084478	0.00047346	13965	5.423380629	5.421949251	0.004420238	4.871847426	4.905409969	0.084252717	0.898260477	0.903156979	0.00267563	0.16047261	0.739634801	0.272959133	1.191699542	5.451661494	5.440318607	0.046883548	0.101585374809518	FAUX	-0.0469451084555241	FAUX	-0.217209654881063	FAUX	-0.172357989236121	FAUX	-0.284455252595019	FAUX	0.151826082648838	FAUX	0.454288828531278	FAUX	0.124933080118319	FAUX	0.0228785953784406	FAUX	-0.206803170607013	FAUX
10Q1C8	lo.sham	1	29797	5.409299543	5.402686009	0.004496541	4.823499378	4.820490455	0.022526959	0.891663581	0.890235807	0.000575148	12561	5.418210173	5.415203797	0.004351997	4.856763593	4.896889814	0.098725018	0.896326014	0.902718745	0.003167201	0.177374413	0.769285885	0.26182774	1.247053203	5.436152177	5.425035082	0.045797696	-0.418766775736135	FAUX	-0.168888823316523	FAUX	0.629629809628323	FAUX	0.670485643289077	FAUX	0.29821322968983	FAUX	-0.82836076567614	FAUX	-0.589794733800944	FAUX	-0.563299816756039	FAUX	-0.374227677130792	FAUX	0.629110152478706	FAUX
10Q1C9	lo.sham	1	31577	5.412915013	5.408493512	0.004439774	4.823574755	4.823272033	0.023565497	0.891085232	0.890135615	0.000618086	11532	5.421910102	5.419575781	0.004320274	4.853141854	4.889928875	0.090655119	0.895056969	0.901367105	0.002902481	0.159556018	0.759885536	0.256570805	1.175297403	5.443749424	5.433375351	0.043586347	-0.760127812307639	FAUX	-0.544998396637488	FAUX	0.173591225080161	FAUX	0.225450549971437	FAUX	-0.457108863299378	FAUX	-0.193064576881885	FAUX	-0.0200349585966924	FAUX	-0.728549586074793	FAUX	-0.698662213762343	FAUX	0.162996568325356	FAUX
10Q1D1	hi.sham	1	33562	5.412226881	5.407976085	0.00445517	4.838299842	4.83535759	0.019289186	0.893920331	0.892537587	0.00047169	13352	5.422153478	5.420697379	0.004312653	4.87136321	4.906318874	0.088015826	0.898361349	0.903591114	0.002793692	0.167165968	0.768124626	0.284824742	1.286725361	5.439288993	5.431931996	0.043783741	0.12871898353185	FAUX	0.0738580119120929	FAUX	-0.013821821060705	FAUX	0.0366947338054733	FAUX	0.715813722109376	FAUX	-0.030084352169399	FAUX	-0.118636768722906	FAUX	0.102839665242068	FAUX	0.0652407210222892	FAUX	0.0105522415920413	FAUX
10Q1D11	lo.EMS	1	32248	5.412847711	5.408141559	0.004484284	4.832945203	4.830607913	0.021302188	0.892823644	0.891486842	0.00053263	14323	5.423526824	5.422065941	0.004175659	4.881274788	4.900962169	0.059309748	0.899978351	0.903455069	0.001836694	0.145290791	0.731690288	0.314194767	1.184130208	5.459680903	5.443228556	0.044183293	0.563677144084231	FAUX	0.0360019060684978	FAUX	-1.66246194396574	FAUX	-1.81490249838729	FAUX	-0.364132229221499	FAUX	0.168782391791357	FAUX	0.653080005182297	FAUX	0.555077106450533	FAUX	-0.184423886661692	FAUX	-1.64749737012747	FAUX
10Q1D12	lo.EMS	1	40312	5.410722712	5.405832812	0.004469985	4.835174687	4.833663367	0.020133487	0.893591729	0.892532607	0.000502029	5579	5.420035574	5.41616935	0.004549458	4.896460635	4.936473528	0.099758541	0.903362674	0.910724837	0.003208398	0.214375336	0.776303997	0.244508524	1.144957092	5.420752356	5.418420623	0.041758674	1.47402784667773	FAUX	2.05889952719703	FAUX	0.700600728212602	FAUX	0.73804639923668	FAUX	-0.776479662683728	FAUX	-0.688055553905337	FAUX	-1.04165697864433	FAUX	1.24796461536826	FAUX	1.47068490000085	FAUX	0.688805956581698	FAUX
10Q1D2	hi.sham	1	30898	5.412218454	5.408038039	0.004383903	4.833725516	4.83224698	0.01967812	0.89307923	0.891504099	0.000492225	13931	5.422400973	5.420287535	0.00428653	4.872811209	4.89740989	0.070886254	0.898608446	0.90222406	0.002237784	0.148948388	0.766850908	0.281960812	1.146612869	5.445927275	5.433497815	0.04206699	0.195185726676275	FAUX	-0.306540686444491	FAUX	-0.971495957729636	FAUX	-0.991104058392603	FAUX	-0.759050479967302	FAUX	-0.089639083202315	FAUX	-0.0116689141548606	FAUX	0.168907789069813	FAUX	-0.349988042783591	FAUX	-0.978843809081317	FAUX
10Q1D3	hi.sham	1	30538	5.411229558	5.405887397	0.004448054	4.828985938	4.825815445	0.019548362	0.892363756	0.890793908	0.00048172	14591	5.424199291	5.423566969	0.004311324	4.870656018	4.899010231	0.07225982	0.897901015	0.901842381	0.002262713	0.146734288	0.761976561	0.299713795	1.227014934	5.449859498	5.43818464	0.040578244	0.00489351523946768	FAUX	-0.412747313827189	FAUX	-0.928550257086689	FAUX	-0.942445030984069	FAUX	0.087284673657275	FAUX	0.386897866979285	FAUX	0.308508331737562	FAUX	0.0705724823047835	FAUX	-0.275399558271997	FAUX	-0.899507280664892	FAUX
10Q1D4	hi.EMS	1	31607	5.414833586	5.410599263	0.004503736	4.835384288	4.832646205	0.019112222	0.892949863	0.891357957	0.00046201	13042	5.424161027	5.423914009	0.004256293	4.899150769	4.92026424	0.065713123	0.903156439	0.906522054	0.002033042	0.136788836	0.757169146	0.322302781	1.266410106	5.454698903	5.440515521	0.038385795	1.41855259294178	FAUX	0.889426205239639	FAUX	-1.32420920900479	FAUX	-1.4014621596719	FAUX	0.501969532145505	FAUX	0.437326502893507	FAUX	0.467740873827967	FAUX	1.37070786741832	FAUX	0.715204519924623	FAUX	-1.27764143117111	FAUX
10Q1D5	hi.EMS	1	30234	5.414115974	5.410164573	0.004457154	4.835460041	4.831069526	0.019556271	0.893083403	0.89136232	0.000478995	13449	5.424486581	5.423410547	0.004278667	4.877472155	4.899719301	0.06325338	0.899120858	0.901871497	0.001976783	0.141869284	0.748457134	0.300490623	1.155363258	5.454268742	5.440813086	0.041962788	0.33301968171464	FAUX	-0.404645447696555	FAUX	-1.42112774454459	FAUX	-1.51780164143369	FAUX	-0.666941380299404	FAUX	0.364168071892187	FAUX	0.488068823383173	FAUX	0.381573652431944	FAUX	-0.24235131623319	FAUX	-1.41971503405339	FAUX
10Q1D7	lo.sham	1	30428	5.408978003	5.402128924	0.00450348	4.826831971	4.824691936	0.022521876	0.892331934	0.89111365	0.000576069	13238	5.420127302	5.417592913	0.004262028	4.865908092	4.891598779	0.076690256	0.897682867	0.900988827	0.002397365	0.163846502	0.780480435	0.317244376	1.345723564	5.437671191	5.426391692	0.042334936	-0.0537862222056112	FAUX	-0.650258656156782	FAUX	-0.696582489307227	FAUX	-0.684130585648986	FAUX	1.3368456968426	FAUX	-0.481196574456002	FAUX	-0.497118849049506	FAUX	-0.146062033943522	FAUX	-0.620831546023529	FAUX	-0.643607373699261	FAUX
10Q1E10	lo.EMS	1	26228	5.419970854	5.417225828	0.004538613	4.860083532	4.859384508	0.019326001	0.896659127	0.894821904	0.000465255	10974	5.435361708	5.4362724	0.00420307	4.898802351	4.931579904	0.081100605	0.901233769	0.907069723	0.002559005	0.086568252	0.657280846	0.284541649	1.249898039	5.503350463	5.482587769	0.039570681	0.901372647246452	FAUX	1.04182148350243	FAUX	-0.418121939268073	FAUX	-0.383445503221378	FAUX	0.328158787843053	FAUX	2.2331333269647	FAUX	3.34187773473961	VRAI	1.35481053353352	FAUX	1.24260351114098	FAUX	-0.388867682439538	FAUX
10Q1E11	lo.EMS	1	32159	5.412465014	5.408763009	0.004440841	4.844302961	4.840291195	0.02109594	0.894986575	0.893305256	0.000528133	14005	5.430823205	5.432472212	0.004126805	4.922845107	4.957089848	0.084145724	0.906403441	0.911904604	0.002652089	0.119385934	0.726097822	0.296246112	1.337709151	5.468053596	5.45661348	0.041845139	2.2919652524375	FAUX	2.38718343636524	FAUX	-0.257764219397715	FAUX	-0.214590067216078	FAUX	1.25248369124528	FAUX	1.68092523263004	FAUX	1.56746193811108	FAUX	2.45181390202236	FAUX	2.43156765249272	FAUX	-0.21298303614304	FAUX
10Q1E12	lo.EMS	1	29912	5.408689284	5.402390362	0.004467716	4.840930278	4.839390048	0.023702335	0.894985558	0.893821057	0.000615543	11648	5.413541476	5.409192332	0.004243425	4.799406965	4.851227764	0.110328616	0.886501646	0.895301868	0.003580762	0.221411401	0.812671703	0.247366419	1.261323667	5.405339953	5.403585465	0.04738587	-3.06142833946307	VRAI	-2.2327212371574	FAUX	1.34207984386949	FAUX	1.33003084091358	FAUX	0.448428219090089	FAUX	-1.70189113622886	FAUX	-2.05511065588186	FAUX	-3.18032151431688	VRAI	-2.50243854543419	FAUX	1.29932853474776	FAUX
10Q1E2	hi.sham	1	32005	5.408889109	5.40206354	0.004420088	4.836215626	4.833707952	0.021643276	0.894084149	0.892776678	0.00055013	14972	5.416150648	5.412620963	0.004165608	4.865858863	4.891110759	0.067793315	0.898360015	0.901671762	0.002137712	0.179601924	0.813184611	0.289039951	1.166036362	5.419155232	5.414036099	0.040525988	0.128360150217985	FAUX	-0.460224037873873	FAUX	-1.14389204881797	FAUX	-1.18921774291373	FAUX	-0.554593232108295	FAUX	-1.2036742609882	FAUX	-1.3411827383792	FAUX	-0.148308214823425	FAUX	-0.643577118505466	FAUX	-1.15749051616621	FAUX
10Q1E4	hi.EMS	1	28580	5.413716524	5.409301501	0.004482651	4.844304624	4.839396334	0.019744701	0.894781813	0.892828423	0.000482252	14626	5.425457292	5.424491249	0.004309592	4.883028199	4.931386669	0.106849726	0.899956637	0.907353642	0.003415843	0.162792288	0.765281006	0.269558574	1.342213994	5.441049277	5.437150219	0.045188009	0.557836284581113	FAUX	1.12082525221874	FAUX	1.05797049314005	FAUX	1.07183792509873	FAUX	1.29990295830589	FAUX	0.521205668969988	FAUX	0.237842568267996	FAUX	0.635080321279379	FAUX	1.23359723947474	FAUX	1.09838947878495	FAUX
10Q1E7	lo.sham	1	30244	5.40902244	5.402263962	0.004477587	4.837109311	4.8352275	0.024257071	0.894229431	0.892927633	0.000642949	13716	5.416409596	5.412517666	0.004286235	4.870102415	4.898610011	0.076898555	0.899097996	0.902849467	0.002445436	0.184018664	0.797608632	0.277708411	1.176278455	5.426905034	5.414973348	0.04085014	0.326870021128844	FAUX	-0.132513904222941	FAUX	-0.613769589647909	FAUX	-0.593676678036475	FAUX	-0.446782029092649	FAUX	-1.21868442351711	FAUX	-1.27715521366138	FAUX	0.0453131336757942	FAUX	-0.294052959810326	FAUX	-0.631576121081905	FAUX
10Q1E9	lo.sham	1	32076	5.412111076	5.40704401	0.004463728	4.83978372	4.839006415	0.022531165	0.894211801	0.892707802	0.000580631	14295	5.421506874	5.419760024	0.004236946	4.863635746	4.902166129	0.088294352	0.897046725	0.902593089	0.002813771	0.16355369	0.782791186	0.277745561	1.267906204	5.433017038	5.428706455	0.044548234	-0.224902370590144	FAUX	-0.203854068903534	FAUX	0.0207686849046266	FAUX	0.0718060173898726	FAUX	0.517717887995165	FAUX	-0.166292091961454	FAUX	-0.338987397110569	FAUX	-0.249742794018279	FAUX	-0.128309876077323	FAUX	0.026639772816397	FAUX
10Q1F10	lo.EMS	1	34169	5.409838986	5.403731194	0.004397654	4.850976557	4.848650887	0.021851758	0.896658416	0.895468235	0.000561267	14049	5.416938462	5.413115276	0.004163819	4.858966867	4.90120759	0.099165677	0.896952159	0.903317146	0.003203989	0.172752509	0.806747811	0.245594946	1.198544554	5.42198717	5.416126038	0.041090937	-0.250339725281606	FAUX	-0.00237677514925145	FAUX	0.693005253298456	FAUX	0.730836695796726	FAUX	-0.212402696698824	FAUX	-1.1318452778603	FAUX	-1.19840998430726	FAUX	-0.462770617869518	FAUX	-0.172985336716795	FAUX	0.65456240979685	FAUX
10Q1F2	hi.sham	1	28232	5.413548248	5.409246497	0.004471681	4.860509779	4.858121953	0.021456297	0.897806759	0.896079966	0.00054639	16480	5.425335154	5.424801628	0.004292116	4.912753725	4.949204538	0.089778501	0.905474272	0.910891275	0.002859805	0.164381068	0.758555825	0.267815772	1.22486044	5.439826624	5.437942307	0.044594922	2.04202762769596	FAUX	2.10521283929522	FAUX	0.100072402799346	FAUX	0.151833837637084	FAUX	0.0646058530265707	FAUX	0.56630706819328	FAUX	0.291953518504963	FAUX	1.99137250974989	FAUX	2.06405015290737	FAUX	0.112363523486338	FAUX
10Q1F3	hi.sham	1	31472	5.408065396	5.401352283	0.004418249	4.8502989	4.84620408	0.020108392	0.896825087	0.895387661	0.000498386	14343	5.417279029	5.414098867	0.004257797	4.864287297	4.906345818	0.099982764	0.897881696	0.904627937	0.00323158	0.182318901	0.788607683	0.240849813	1.167122442	5.424360291	5.418867825	0.043499913	-0.000303112039716145	FAUX	0.36236608813011	FAUX	0.740536836051056	FAUX	0.775872933488295	FAUX	-0.543160843106241	FAUX	-0.98891895113261	FAUX	-1.0111066797282	FAUX	-0.220014353495818	FAUX	0.0664965234585712	FAUX	0.701756971976019	FAUX
10Q1F4	hi.EMS	1	30615	5.411139383	5.405656216	0.004467323	4.853817409	4.849987249	0.021006114	0.896965223	0.895440206	0.000525388	15450	5.420444801	5.418614467	0.00433446	4.883353521	4.911902996	0.081837684	0.900865166	0.905267956	0.0025939	0.167249191	0.782135922	0.283209215	1.230598977	5.430579476	5.426556803	0.049980528	0.802221945605964	FAUX	0.540458829545938	FAUX	-0.358007605603038	FAUX	-0.319791347331563	FAUX	0.125011336312048	FAUX	-0.332753816466094	FAUX	-0.485839403956799	FAUX	0.649923849610477	FAUX	0.325504750568323	FAUX	-0.346294344843347	FAUX
10Q1F8	lo.sham	1	32634	5.40677234	5.400325539	0.004396796	4.850708212	4.84756649	0.021424175	0.897117209	0.895791675	0.000546748	15124	5.41364511	5.409219416	0.004219692	4.882574519	4.908141737	0.075829801	0.901857435	0.90592148	0.002404191	0.197831262	0.81254959	0.285058391	1.20840746	5.416237354	5.407697607	0.040330655	1.06913287027592	FAUX	0.722309494512185	FAUX	-0.684823198818689	FAUX	-0.671231392864636	FAUX	-0.108582924598507	FAUX	-1.69795554040387	FAUX	-1.77419248627267	FAUX	0.614380178241881	FAUX	0.150200481874647	FAUX	-0.693306851233326	FAUX
10Q1F9	lo.sham	1	33116	5.407832392	5.402140107	0.004376148	4.851580865	4.847440006	0.022222498	0.897104307	0.895594454	0.000577923	14814	5.416236944	5.413261195	0.00428785	4.864778351	4.907663909	0.106550015	0.898127735	0.904929223	0.003434586	0.186512758	0.80781693	0.257666913	1.284445255	5.419007348	5.414161628	0.041330519	0.065879039166117	FAUX	0.44620242687976	FAUX	1.09025944444779	FAUX	1.10149086557905	FAUX	0.691812673606576	FAUX	-1.11064168137588	FAUX	-1.33260731055767	FAUX	-0.197608939902209	FAUX	0.127929936798812	FAUX	1.08107831188928	FAUX
10Q1G11	lo.EMS	1	34522	5.409454016	5.403240665	0.00445137	4.851245818	4.849035319	0.022448003	0.896770304	0.895322599	0.000577233	15181	5.421355512	5.418985346	0.004275136	4.850140023	4.892923425	0.096804759	0.894590214	0.900960007	0.003105295	0.142414861	0.778934194	0.254076581	1.20903261	5.441339371	5.431342853	0.039641961	-0.885680468537249	FAUX	-0.658278156839749	FAUX	0.522983071130897	FAUX	0.568131606906705	FAUX	-0.1020024167311	FAUX	-0.278861118047273	FAUX	-0.158883670021076	FAUX	-0.865514696007901	FAUX	-0.559092618098575	FAUX	0.51819689259866	FAUX
10Q1G2	hi.sham	1	32739	5.409026021	5.402437644	0.004490763	4.851761594	4.847776187	0.022303933	0.896936674	0.895584671	0.000571448	15064	5.417113705	5.414481147	0.004253599	4.863536061	4.910280141	0.103025323	0.897771389	0.904899874	0.003339669	0.179832714	0.794543282	0.235852776	1.160739298	5.422335453	5.41835433	0.041686428	-0.0299746460366217	FAUX	0.438035725785252	FAUX	0.926743977805462	FAUX	0.950479014758469	FAUX	-0.610351644211259	FAUX	-0.933369565075294	FAUX	-1.0461857396205	FAUX	-0.254291140338817	FAUX	0.249866936482438	FAUX	0.877493753872302	FAUX
10Q1G3	hi.sham	1	32539	5.409676921	5.403838316	0.004412748	4.854126252	4.852608067	0.021666184	0.897268845	0.895818159	0.000556907	14824	5.418587077	5.415587607	0.004318395	4.870271653	4.912272544	0.095552587	0.898776634	0.905076379	0.003088304	0.171681058	0.802549919	0.237062797	1.115124675	5.4256674	5.419926849	0.040870822	0.240426699233492	FAUX	0.487150297889518	FAUX	0.493712326230407	FAUX	0.539861012130789	FAUX	-1.09050422442462	FAUX	-0.772589054201214	FAUX	-0.938760179132607	FAUX	0.0530349878623978	FAUX	0.342728595532796	FAUX	0.445872024729004	FAUX
10Q1G7	lo.sham	1	32784	5.410253158	5.405310495	0.004401389	4.852457021	4.8492228	0.021210993	0.896863471	0.895661186	0.00054014	14559	5.420088822	5.417700821	0.004257812	4.886089473	4.913228219	0.071260786	0.901446516	0.904724647	0.002260308	0.155505186	0.794285322	0.273021236	1.116936471	5.43386577	5.426011617	0.039248693	0.95859956705426	FAUX	0.389276772066563	FAUX	-0.932693400014455	FAUX	-0.947127640388772	FAUX	-1.0714327410492	FAUX	-0.465516384148659	FAUX	-0.523083412849626	FAUX	0.774757648199286	FAUX	0.387270571233938	FAUX	-0.957211016291702	FAUX
10Q1G8	lo.sham	1	32708	5.410291668	5.404233154	0.004434222	4.853612153	4.850514518	0.021855988	0.897070713	0.895790986	0.000561197	14716	5.418958839	5.416744493	0.004276007	4.883910553	4.916582902	0.084242803	0.901228591	0.906220633	0.002696943	0.16757271	0.79749932	0.257184937	1.141544128	5.430151289	5.422070871	0.039166379	0.89997981448846	FAUX	0.80555230116758	FAUX	-0.180493311754458	FAUX	-0.134282857403704	FAUX	-0.81240549880815	FAUX	-0.604481104430639	FAUX	-0.792292781887655	FAUX	0.67533965387001	FAUX	0.543625198770668	FAUX	-0.207375798600659	FAUX
10Q1G9	lo.sham	1	33217	5.410851457	5.405406129	0.004447104	4.856910463	4.852711718	0.02004056	0.89758344	0.895805739	0.000491295	14817	5.417417378	5.413371023	0.004279317	4.887547582	4.922120551	0.090708418	0.902143573	0.907489468	0.002904275	0.175609098	0.793412972	0.2672634	1.230484295	5.430317334	5.418153739	0.040238856	1.14610127114625	FAUX	1.15862041876151	FAUX	0.176681785750603	FAUX	0.228533331827629	FAUX	0.123804160748981	FAUX	-1.09468249446599	FAUX	-1.05988897665851	FAUX	0.841287062906298	FAUX	0.8017232207966	FAUX	0.166075093585931	FAUX
10Q1H2	hi.sham	1	33712	5.410481776	5.404990137	0.004366509	4.852417366	4.851478499	0.024464124	0.896816243	0.895629513	0.000649237	14581	5.418497927	5.415237185	0.004176526	4.863568222	4.924847633	0.13074732	0.897526316	0.90789313	0.004251454	0.190590494	0.792263905	0.23532643	1.316677769	5.419024511	5.41792485	0.04534037	-0.095896952428973	FAUX	1.27094407194276	FAUX	2.49749473638904	FAUX	2.32330038013838	FAUX	1.03110134346719	FAUX	-0.82350913100614	FAUX	-1.0755253722216	FAUX	-0.252823724318208	FAUX	0.928826702816226	FAUX	2.47870330823704	FAUX
10Q1H6	hi.EMS	1	33046	5.411816764	5.406443092	0.004433275	4.856358816	4.852181008	0.020628258	0.897326887	0.895824386	0.000519229	14597	5.421065875	5.419374098	0.004206344	4.875932357	4.922336131	0.107668869	0.899382319	0.906421948	0.003463572	0.160991985	0.781735973	0.259352482	1.312148876	5.434306454	5.42850735	0.041008347	0.403350204259567	FAUX	0.861570544748042	FAUX	1.14019422237055	FAUX	1.14719019387405	FAUX	0.98342891922156	FAUX	-0.222371280942273	FAUX	-0.352589119074465	FAUX	0.311316998294919	FAUX	0.811770945307187	FAUX	1.14570279456054	FAUX
10Q1H9	lo.sham	1	30676	5.41095371	5.405124289	0.004459316	4.855237323	4.851695482	0.022023065	0.897256946	0.895616099	0.000557693	15572	5.423114641	5.422358351	0.004323095	4.881868897	4.938899817	0.125825145	0.900131592	0.909194942	0.004066577	0.17820447	0.775622913	0.248631638	1.341351853	5.429831315	5.430212163	0.046708293	0.604897515785204	FAUX	1.63318842388857	FAUX	2.17900332888107	FAUX	2.05784802702862	FAUX	1.2908278153269	FAUX	0.211272702498219	FAUX	-0.236125984414746	FAUX	0.582184629991101	FAUX	1.58376906112472	FAUX	2.19440078709272	FAUX
10Q2A1	hi.sham	1	35145	5.408125184	5.40166414	0.004406473	4.807601517	4.805371706	0.022128277	0.888921873	0.887679151	0.000574222	13646	5.416767639	5.413577188	0.004111043	4.851619151	4.891888541	0.097139058	0.895610382	0.901894128	0.003113175	0.188773267	0.817528946	0.267075061	1.298237837	5.412270534	5.412514304	0.04192091	-0.611264978182653	FAUX	-0.398348108350409	FAUX	0.536558109081334	FAUX	0.581216544991043	FAUX	0.836997340267185	FAUX	-1.06472450771154	FAUX	-1.44514312348269	FAUX	-0.798026243418405	FAUX	-0.607326356536368	FAUX	0.537505846164111	FAUX
10Q2A10	lo.EMS	1	31960	5.415588574	5.41156247	0.004517266	4.813022521	4.811789419	0.020794976	0.888702817	0.887448359	0.000530756	12712	5.422631713	5.421208109	0.00416536	4.865241126	4.90999972	0.096572261	0.897162871	0.904524219	0.003102555	0.164883575	0.744650724	0.255795147	1.231663997	5.445308459	5.436758796	0.046552876	-0.193660201121269	FAUX	0.333505346567496	FAUX	0.518262816818182	FAUX	0.563577878706507	FAUX	0.136222041725065	FAUX	0.0441301972212368	FAUX	0.211102773605527	FAUX	-0.176493817582109	FAUX	0.236797111104448	FAUX	0.50476791708255	FAUX
10Q2A12	lo.EMS	1	36582	5.411386911	5.406139763	0.004453445	4.811438033	4.809404822	0.02255075	0.889095258	0.888029109	0.000586454	12762	5.420351033	5.418365933	0.00425188	4.807037047	4.85348527	0.100586457	0.886809524	0.894143847	0.003251597	0.171446482	0.78725905	0.239429774	1.164548063	5.428973295	5.424953469	0.041153418	-2.97861208533689	VRAI	-2.55495406853756	FAUX	0.775020533342159	FAUX	0.808426060031193	FAUX	-0.570259493451264	FAUX	-0.368868473561418	FAUX	-0.595370070104086	FAUX	-2.83218232196117	VRAI	-2.39722100035112	FAUX	0.736625996725683	FAUX
10Q2A2	hi.sham	1	31892	5.411356428	5.406792168	0.004460795	4.808024991	4.805303716	0.021851921	0.888470251	0.887115746	0.000562816	12812	5.420196423	5.417703311	0.004256503	4.867294363	4.904929124	0.08749402	0.897954174	0.903962444	0.002801414	0.181236341	0.788323447	0.255832574	1.159894717	5.42542191	5.422434706	0.043078343	0.0191927807053201	FAUX	0.177184909504103	FAUX	-0.000518972957498295	FAUX	0.0502127474477335	FAUX	-0.619241945603187	FAUX	-0.465154560429708	FAUX	-0.767437642585625	FAUX	-0.0828103852290923	FAUX	0.000467434360268071	FAUX	-0.0195870284152689	FAUX
10Q2A6	hi.EMS	1	35666	5.413251916	5.40797269	0.004481311	4.807617339	4.80613247	0.019805994	0.888083798	0.886823584	0.000493593	10897	5.439805891	5.442385688	0.003937088	4.897721332	4.927190653	0.074886631	0.900273321	0.904290152	0.002304188	0.09213545	0.684683858	0.335134768	1.461618607	5.489774693	5.478075653	0.039440504	0.643021268963567	FAUX	0.268373477505812	FAUX	-0.85710042218893	FAUX	-0.862079982200108	FAUX	2.55679009779464	FAUX	3.12145967202954	VRAI	3.03363561474857	VRAI	1.30548667546998	FAUX	1.03802987325324	FAUX	-0.74778390840169	FAUX
10Q2A7	lo.sham	1	31306	5.413486578	5.408160224	0.004527556	4.808876086	4.805833758	0.018574643	0.888276855	0.88679454	0.00044699	13134	5.42321854	5.421469011	0.004284702	4.875548143	4.905531447	0.075178545	0.898984641	0.903521044	0.00238754	0.151210598	0.751104005	0.262544659	1.099739503	5.44817317	5.437507988	0.042848912	0.296378604117976	FAUX	0.0543602182668837	FAUX	-0.71350821873147	FAUX	-0.702729314680503	FAUX	-1.25245294935053	FAUX	0.0820420574313343	FAUX	0.262283312926827	FAUX	0.293786393558052	FAUX	0.028540426151716	FAUX	-0.730923092571833	FAUX
10Q2A9	lo.sham	1	32437	5.413254247	5.408533354	0.004474612	4.807661217	4.805731876	0.021914366	0.888091907	0.886854308	0.000565862	12702	5.423109239	5.42152907	0.004188453	4.854104285	4.902399997	0.104930723	0.895023747	0.903061664	0.003375392	0.148244371	0.735553456	0.254476392	1.273714323	5.454250618	5.43979438	0.045114546	-0.769064214371378	FAUX	-0.0734676173936291	FAUX	0.988284724087624	FAUX	1.0075626494135	FAUX	0.578855811332518	FAUX	0.0907692745947007	FAUX	0.418476619395599	FAUX	-0.684636565082623	FAUX	-0.117409786849014	FAUX	0.987548764876256	FAUX
10Q2B1	hi.sham	1	31443	5.413339996	5.408406187	0.004521809	4.828302757	4.826078044	0.02093718	0.891890602	0.89039894	0.000529412	12719	5.42228788	5.421073072	0.004260345	4.878633849	4.915766426	0.091869307	0.899687874	0.905585308	0.0029369	0.174777891	0.771837409	0.266892161	1.239363426	5.433408463	5.429487425	0.046664228	0.485541593477149	FAUX	0.62876571992545	FAUX	0.232885543762403	FAUX	0.284430427612609	FAUX	0.217268435565029	FAUX	0.0245078721061302	FAUX	-0.285635965443217	FAUX	0.434578483955945	FAUX	0.505570991898475	FAUX	0.233127498156818	FAUX
10Q2B10	lo.EMS	1	32670	5.413726557	5.410015919	0.004431635	4.81094491	4.810148474	0.020811547	0.888621909	0.88725599	0.000529068	13149	5.420982631	5.418803258	0.004365626	4.859026527	4.902525037	0.097772853	0.896299663	0.903546313	0.003150558	0.161152939	0.766446118	0.242174345	1.146077563	5.441705961	5.432014718	0.040106271	-0.425854944142068	FAUX	0.0613916118393177	FAUX	0.600958571479958	FAUX	0.643067527799268	FAUX	-0.764685264170247	FAUX	-0.305320458343499	FAUX	-0.112985671842934	FAUX	-0.460048499782731	FAUX	-0.111581938844524	FAUX	0.574113548325994	FAUX
10Q2B11	lo.EMS	1	35335	5.411271515	5.40587034	0.004430186	4.811948385	4.810205626	0.021383536	0.889208158	0.888001725	0.00054651	12882	5.431533836	5.432587713	0.004173417	4.833719152	4.873332229	0.082396388	0.889903532	0.896297101	0.002630511	0.124825338	0.756016147	0.252547938	1.122152806	5.459108438	5.450438493	0.036583638	-2.14635335689107	FAUX	-1.95578606286178	FAUX	-0.294937083470623	FAUX	-0.253465511923677	FAUX	-1.01652410551127	FAUX	1.69770876731402	FAUX	1.14562192251817	FAUX	-1.61475287820802	FAUX	-1.47219652495915	FAUX	-0.314023863648872	FAUX
10Q2B12	lo.EMS	1	47931	5.410451695	5.405137104	0.004450718	4.826026811	4.823568772	0.01956502	0.891946383	0.8908018	0.000484883	5264	5.417879813	5.412848466	0.004437517	4.766039648	4.891060521	0.226961434	0.879597395	0.903577089	0.00749865	0.238031915	0.739931611	0.205954191	1.47291148	5.43937917	5.417352923	0.080020116	-4.91860620006675	VRAI	0.0699553923049217	FAUX	8.09150602223995	VRAI	6.28466499483788	VRAI	2.67566211190669	VRAI	-1.17061563386627	FAUX	-1.1145961742489	FAUX	-4.702778388497	VRAI	-0.645918604654289	FAUX	8.03598544060067	VRAI
10Q2B2	hi.sham	1	29083	5.413696941	5.408982381	0.004552578	4.819516739	4.817433144	0.019693309	0.890211679	0.888640888	0.000489556	13762	5.421369413	5.420068023	0.004228484	4.895349047	4.919752556	0.069933516	0.902925038	0.90676631	0.00219211	0.15542799	0.759337306	0.303709344	1.235118057	5.446538453	5.433813021	0.039871486	1.35630792453075	FAUX	0.957393282228392	FAUX	-1.0501794962256	FAUX	-1.08096382589067	FAUX	0.172580466110414	FAUX	-0.121536532276856	FAUX	0.00986416825566115	FAUX	1.19724597976873	FAUX	0.691356018818404	FAUX	-1.03387350944548	FAUX
10Q2B4	hi.EMS	1	29155	5.411312852	5.406006778	0.004511414	4.815174905	4.812712867	0.016900124	0.889808118	0.888104407	0.00040726	13163	5.41744963	5.413583053	0.004283264	4.878328683	4.902079077	0.067124839	0.90046126	0.903794556	0.002128889	0.163792449	0.758565677	0.267438666	1.058713346	5.443549472	5.427016831	0.040336966	0.69357507269174	FAUX	0.130468118016941	FAUX	-1.15909161224902	FAUX	-1.2069050874251	FAUX	-1.68430602286576	FAUX	-1.06387226027708	FAUX	-0.454412905618715	FAUX	0.420654617243337	FAUX	-0.132367184334586	FAUX	-1.19610137663429	FAUX
10Q2B6	hi.EMS	1	31882	5.413483399	5.409081443	0.004463156	4.810349349	4.810151836	0.020987	0.888551711	0.887342186	0.00053343	12703	5.423756056	5.421287961	0.004324332	4.861939064	4.89379504	0.082757469	0.896367358	0.901377221	0.002620665	0.148468866	0.739746517	0.279818402	1.224109686	5.455236632	5.440441492	0.042080054	-0.407645632911403	FAUX	-0.542183501810673	FAUX	-0.311898990026461	FAUX	-0.271257270388826	FAUX	0.0567032014973558	FAUX	0.0557335496734626	FAUX	0.46268363330026	FAUX	-0.327157624050819	FAUX	-0.51846849990907	FAUX	-0.293167994315231	FAUX
10Q2B7	lo.sham	1	30573	5.415003415	5.410759524	0.004507953	4.813539325	4.811980292	0.019047127	0.888891347	0.887481566	0.000466719	13203	5.423124307	5.42070562	0.004245119	4.88020129	4.902128046	0.066312213	0.899854638	0.903173063	0.002086283	0.149965917	0.761645081	0.284925325	1.126115368	5.44793879	5.436296256	0.039068743	0.530399523576386	FAUX	-0.0424695481160229	FAUX	-1.23248984409119	FAUX	-1.29283726125048	FAUX	-0.9748130435004	FAUX	-0.0288868464393483	FAUX	0.179504669704682	FAUX	0.506096410474319	FAUX	-0.130084843572189	FAUX	-1.24303827354418	FAUX
10Q2B8	lo.sham	1	31890	5.412730019	5.407838566	0.004508644	4.809470001	4.8072102	0.020431115	0.888510652	0.887207816	0.000511642	13135	5.421961334	5.41965428	0.004312337	4.867186358	4.898648405	0.08179393	0.897642161	0.902524498	0.002607989	0.16673011	0.773658165	0.265124722	1.154660808	5.438720049	5.429736135	0.039943401	-0.0647357490976134	FAUX	-0.22294031357198	FAUX	-0.333736195744701	FAUX	-0.294212135057598	FAUX	-0.67433557009619	FAUX	-0.181657829848038	FAUX	-0.268645511815026	FAUX	-0.087738349760866	FAUX	-0.292263497268041	FAUX	-0.348821555377338	FAUX
10Q2B9	lo.sham	1	30813	5.412725459	5.407409602	0.004463711	4.80892679	4.805296916	0.020858836	0.888409431	0.886951755	0.000524617	13060	5.420096718	5.417725719	0.004367298	4.825079272	4.8896434	0.132650494	0.890148805	0.901170811	0.004298424	0.186370597	0.782924962	0.248665118	1.370449112	5.425870116	5.422773629	0.042881062	-2.08037725240069	FAUX	-0.599619488485505	FAUX	2.57841092072052	FAUX	2.38981687853933	FAUX	1.59711389349939	FAUX	-0.46189843758063	FAUX	-0.744284349533369	FAUX	-2.00896631461019	FAUX	-0.711967595312867	FAUX	2.58862974652424	VRAI
10Q2C1	hi.sham	1	32568	5.411112423	5.406071571	0.004412732	4.840069608	4.8374748	0.019922263	0.894433025	0.892970828	0.00049805	13494	5.418756324	5.415312298	0.004312614	4.879850171	4.915850781	0.091647638	0.900511765	0.906412493	0.002950084	0.186823774	0.780569142	0.248680672	1.146389953	5.424182294	5.420589389	0.045980337	0.707160437396709	FAUX	0.85893958087029	FAUX	0.255597891521103	FAUX	0.30693072084036	FAUX	-0.761396957599505	FAUX	-0.812594406105707	FAUX	-0.89349921195474	FAUX	0.490075837552489	FAUX	0.509502598731598	FAUX	0.220324000605524	FAUX
10Q2C11	lo.EMS	1	33053	5.411029157	5.404852524	0.004463049	4.833285551	4.831559453	0.020975805	0.893188166	0.891842184	0.000525684	13822	5.418428454	5.415340673	0.004250294	4.870536387	4.89897735	0.077470154	0.898831928	0.903299518	0.002444718	0.160179424	0.778975546	0.294300702	1.256460958	5.438012906	5.425393997	0.03829158	0.255300259395817	FAUX	-0.00728197147262103	FAUX	-0.615006503004307	FAUX	-0.595021145561255	FAUX	0.397241952063903	FAUX	-0.808471214127595	FAUX	-0.56527570093555	FAUX	0.0651140560754367	FAUX	-0.276932071629608	FAUX	-0.598560830730876	FAUX
10Q2C2	hi.sham	1	31138	5.411635292	5.406734292	0.004471049	4.830110862	4.82815701	0.019723584	0.892505809	0.890965136	0.000489385	13357	5.421302963	5.419954097	0.004290824	4.888611897	4.91302399	0.068337112	0.901710901	0.905100851	0.002154613	0.161862694	0.776596541	0.277833922	1.1087745	5.438996108	5.429618258	0.039412219	1.02971661779236	FAUX	0.49395991692884	FAUX	-1.11477634876717	FAUX	-1.15543817550546	FAUX	-1.1573479843973	FAUX	-0.138091202560326	FAUX	-0.276698198487579	FAUX	0.889848764407282	FAUX	0.377751892650263	FAUX	-1.12608105630533	FAUX
10Q2C5	hi.EMS	1	30791	5.41277216	5.407896296	0.004553913	4.824646866	4.82040509	0.020965905	0.891304959	0.889574166	0.000522579	13977	5.426675966	5.42548368	0.004160239	4.912017092	4.936126525	0.074038196	0.905126472	0.908713601	0.002356842	0.142019031	0.762395364	0.273026485	1.151790656	5.447841894	5.441622878	0.039837577	1.94847273522204	FAUX	1.4992496841858	FAUX	-0.766392294239401	FAUX	-0.761088560231741	FAUX	-0.704547611712857	FAUX	0.665416542555408	FAUX	0.543389210277441	FAUX	1.95776201674568	FAUX	1.45451182945466	FAUX	-0.796789116369118	FAUX
10Q2D1	hi.sham	1	32538	5.414184947	5.409843551	0.004433295	4.847182504	4.846318552	0.021480412	0.895235911	0.893727046	0.000545375	14328	5.423245474	5.422758043	0.004266539	4.888837905	4.917665649	0.081389131	0.901422403	0.905995589	0.002590658	0.162060302	0.766890006	0.265305597	1.158755358	5.439658704	5.435065184	0.044035979	0.952113399365277	FAUX	0.74293118695193	FAUX	-0.3635926656329	FAUX	-0.325687168500919	FAUX	-0.631235164611909	FAUX	0.269352238995086	FAUX	0.095404827603606	FAUX	0.900160874104928	FAUX	0.594089729667171	FAUX	-0.372202555901842	FAUX
10Q2D12	lo.EMS	1	32469	5.407919456	5.401794157	0.00437645	4.840655313	4.837799853	0.021713627	0.895068011	0.893604786	0.000557298	14674	5.415461747	5.411744253	0.004219562	4.873323313	4.903621672	0.085753605	0.899847276	0.904380604	0.002744727	0.187951479	0.79998637	0.266426752	1.201075591	5.419486183	5.413315694	0.043372231	0.528419215587919	FAUX	0.29354280005178	FAUX	-0.0981748328935874	FAUX	-0.049461010162671	FAUX	-0.185760276653711	FAUX	-1.33106963152886	FAUX	-1.39039671347473	FAUX	0.192273654988715	FAUX	-0.060470117856171	FAUX	-0.12011258314207	FAUX
10Q2D2	hi.sham	1	31765	5.410943363	5.404666122	0.004473014	4.839215939	4.835462269	0.020188594	0.89429915	0.892604213	0.000498718	13854	5.418122274	5.414387491	0.004233839	4.881369495	4.899938083	0.067873174	0.900899309	0.903188134	0.002140466	0.163707233	0.778114624	0.284930337	1.140829096	5.43522026	5.423343374	0.041081093	0.811406087911142	FAUX	-0.0382758668255081	FAUX	-1.13914767641753	FAUX	-1.18370431535874	FAUX	-0.819932130338901	FAUX	-0.946978786851398	FAUX	-0.705362609344445	FAUX	0.559398320624985	FAUX	-0.232154353324397	FAUX	-1.1528778977534	FAUX
10Q2D3	hi.sham	1	30158	5.414422554	5.409666043	0.004428677	4.834502622	4.832764305	0.021802496	0.892857088	0.891578298	0.000559366	13889	5.422488989	5.421246802	0.004308814	4.88365239	4.913837685	0.084185	0.900591982	0.904769796	0.002686691	0.167038664	0.762617899	0.2613186	1.15507138	5.439170131	5.433256055	0.046020438	0.728738047545027	FAUX	0.401840007192673	FAUX	-0.198154642854441	FAUX	-0.152578942427643	FAUX	-0.670013771685988	FAUX	0.0497527053165907	FAUX	-0.0281845832841475	FAUX	0.66356040191491	FAUX	0.415676483037325	FAUX	-0.210714472790363	FAUX
10Q2D5	hi.EMS	1	30461	5.41416267	5.409373419	0.004458756	4.830524795	4.829676784	0.022278751	0.892165089	0.8909503	0.000575447	13374	5.420401303	5.417632759	0.004261653	4.869163682	4.890448965	0.066575771	0.898272693	0.901105676	0.002100507	0.160759683	0.751383281	0.280437863	1.108423466	5.448298877	5.432213827	0.044644924	0.104871362637184	FAUX	-0.617744060899932	FAUX	-1.20798586695832	FAUX	-1.26405208319747	FAUX	-1.16104306877501	FAUX	-0.475406523088323	FAUX	-0.0993836766217506	FAUX	0.00248138580497876	FAUX	-0.674421926904956	FAUX	-1.22781528698483	FAUX
10Q2D7	lo.sham	1	30048	5.412731602	5.406992973	0.004541463	4.831050024	4.829471024	0.022704618	0.892497037	0.891279326	0.000584816	13944	5.421201941	5.418584651	0.004354619	4.889719137	4.909748531	0.065202271	0.901929156	0.904301272	0.002046312	0.170754446	0.764486517	0.290666645	1.124738337	5.43849654	5.429484194	0.043461432	1.0884251372199	FAUX	0.271467747026795	FAUX	-1.30134870727862	FAUX	-1.37425626958242	FAUX	-0.989308066021662	FAUX	-0.337086401206893	FAUX	-0.285856688999457	FAUX	0.940369012989688	FAUX	0.225089726968202	FAUX	-1.30714800327219	FAUX
10Q2D9	lo.sham	1	31663	5.411718467	5.40673259	0.004525767	4.832943138	4.830742601	0.02057738	0.893012418	0.891693089	0.000510945	12591	5.419843161	5.416925783	0.004308331	4.861807289	4.893839404	0.080558804	0.896983809	0.9014757	0.002542271	0.160193789	0.766658724	0.293268659	1.268141267	5.442226797	5.429539117	0.041571606	-0.241826176268397	FAUX	-0.514780573019657	FAUX	-0.446949944986677	FAUX	-0.41412498908046	FAUX	0.520192228426801	FAUX	-0.578137722097529	FAUX	-0.2821046618006	FAUX	-0.333170146861574	FAUX	-0.516400788385759	FAUX	-0.420161854275874	FAUX
10Q2E10	lo.EMS	1	31236	5.412070097	5.406693434	0.004535883	4.845357645	4.841478353	0.019679122	0.895251023	0.893639143	0.000483021	13327	5.415850809	5.41078398	0.004359525	4.85987301	4.8928345	0.090172695	0.89730718	0.903128513	0.002899873	0.191490958	0.77084115	0.249479361	1.134625582	5.430224209	5.417881713	0.042702256	-0.154842452478329	FAUX	-0.0548661045152563	FAUX	0.169098369880321	FAUX	0.220967303386339	FAUX	-0.885232094639598	FAUX	-1.47060760264275	FAUX	-1.07847224688755	FAUX	-0.421425860083327	FAUX	-0.563237222895423	FAUX	0.135131984181044	FAUX
10Q2E11	lo.EMS	1	28887	5.412091952	5.406937676	0.004476412	4.846538167	4.843982955	0.022009098	0.895462761	0.893817984	0.000560865	14120	5.421680896	5.41910449	0.004338587	4.889076148	4.916611845	0.076428512	0.901729492	0.905183152	0.00242755	0.160056657	0.774433428	0.270464439	1.13517735	5.440427728	5.430009713	0.041425945	1.03471741999473	FAUX	0.51686112878545	FAUX	-0.644582169442516	FAUX	-0.627227527082158	FAUX	-0.879424026711925	FAUX	-0.261548216372147	FAUX	-0.249956217766987	FAUX	0.911031232458145	FAUX	0.544974170338125	FAUX	-0.658725584468768	FAUX
10Q2E6	hi.EMS	1	32609	5.410682671	5.405571732	0.004522815	4.836673968	4.835160853	0.022772999	0.893870645	0.892678123	0.000583925	13881	5.427741722	5.427862464	0.003965242	4.835864618	4.866316882	0.082576563	0.890889405	0.895258094	0.002594884	0.121028744	0.739355954	0.299100467	1.364930805	5.461981919	5.448090762	0.041149275	-1.88116289539614	FAUX	-2.24490186251811	FAUX	-0.356312448579785	FAUX	-0.318002598169336	FAUX	1.53902661424117	FAUX	1.01107938330804	FAUX	0.985238284196627	FAUX	-1.51686129585455	FAUX	-1.79916690255544	FAUX	-0.303617040090754	FAUX
10Q2E7	lo.sham	1	27541	5.411642177	5.406432019	0.004492328	4.841050389	4.838584657	0.020816229	0.894523581	0.892949787	0.000520106	14991	5.420860987	5.418896794	0.004446117	4.904636708	4.924555801	0.063683028	0.904738389	0.906673334	0.001989747	0.174504703	0.758188246	0.295728002	1.119215888	5.440239871	5.42931292	0.044456766	1.84408209883345	FAUX	0.931521627283988	FAUX	-1.39879439530735	FAUX	-1.49084775652353	FAUX	-1.04743894515765	FAUX	-0.291728673854949	FAUX	-0.297557155223994	FAUX	1.62101584219143	FAUX	0.915225035039212	FAUX	-1.39489876693477	FAUX
10Q2E8	lo.sham	1	27877	5.41091926	5.405196047	0.004450261	4.84110702	4.838112053	0.02344459	0.894650767	0.893134512	0.000608034	14625	5.421170395	5.419521236	0.004314454	4.900088813	4.932653837	0.083413835	0.903849785	0.908247421	0.002671648	0.184615385	0.768683761	0.252865393	1.111848242	5.431017297	5.42795326	0.046907078	1.60505607332483	FAUX	1.36952966932182	FAUX	-0.224069528119468	FAUX	-0.179488523042182	FAUX	-1.12499289615706	FAUX	-0.200990550677292	FAUX	-0.390441398640415	FAUX	1.41350817815601	FAUX	1.29265724027555	FAUX	-0.255256601771607	FAUX
10Q2E9	lo.sham	1	29020	5.411500836	5.405607576	0.004487616	4.844261215	4.841290629	0.022138057	0.895144496	0.893580266	0.000572674	13953	5.420551437	5.417420206	0.004362881	4.887555883	4.912208764	0.069953037	0.901635205	0.904976747	0.002202181	0.174156095	0.768436895	0.285992523	1.145173426	5.434528944	5.428296814	0.045446186	1.00935511365004	FAUX	0.459426533418846	FAUX	-1.03282997754555	FAUX	-1.06107012364695	FAUX	-0.774202469067816	FAUX	-0.506292754789247	FAUX	-0.366971741988954	FAUX	0.841665814200955	FAUX	0.339755945614944	FAUX	-1.03274598563431	FAUX
10Q2F1	hi.sham	1	32004	5.412768228	5.408796049	0.004444806	4.849875005	4.848216837	0.022244666	0.895970784	0.89468472	0.000575986	13833	5.421647073	5.420006932	0.004135835	4.876382833	4.905917246	0.082522933	0.899372423	0.903422018	0.002611758	0.161931613	0.767729343	0.290311846	1.296792555	5.435982848	5.430021814	0.044234619	0.400688274369047	FAUX	0.0268050803546587	FAUX	-0.327243261983889	FAUX	-0.287381067536033	FAUX	0.821783888181085	FAUX	-0.130413710114121	FAUX	-0.249129546224391	FAUX	0.331870951819362	FAUX	0.0465216956036732	FAUX	-0.3067146837562	FAUX
10Q2F12	lo.EMS	1	35047	5.409908568	5.404073892	0.004329238	4.841991863	4.840670561	0.023547845	0.89498453	0.893896873	0.000618931	13498	5.425204904	5.425358119	0.004107231	4.846784005	4.887290894	0.101316438	0.893329089	0.898589417	0.003262225	0.168173063	0.770854941	0.257072353	1.276793827	5.436177573	5.43474929	0.042406014	-1.22491110042679	FAUX	-1.31792243595172	FAUX	0.793329607369727	FAUX	0.825669379956546	FAUX	0.611271552034296	FAUX	0.647171181922532	FAUX	0.0738247449434056	FAUX	-1.01864036307822	FAUX	-0.821612888000069	FAUX	0.778789357168465	FAUX
10Q2F2	hi.sham	1	30110	5.413263465	5.408845181	0.004385926	4.849103895	4.846330926	0.02128948	0.89574242	0.894138575	0.000537175	13723	5.423384199	5.422140705	0.004235515	4.892779938	4.913972703	0.070535313	0.90211877	0.904635193	0.002214521	0.150404431	0.76557604	0.297258355	1.213065584	5.443625135	5.43498703	0.042978496	1.13942950001906	FAUX	0.364385154644862	FAUX	-1.01157160593281	FAUX	-1.03675627697761	FAUX	-0.0595501778507434	FAUX	0.179646403246906	FAUX	0.0900657905208544	FAUX	1.08002475824927	FAUX	0.421969384363842	FAUX	-0.99911399676723	FAUX
10Q2F3	hi.sham	1	31110	5.414188005	5.410387458	0.004435876	4.847497901	4.84538334	0.020781151	0.895293775	0.893880407	0.000521444	13743	5.422369683	5.42121552	0.004192971	4.865170904	4.902883648	0.08670627	0.89718464	0.902597256	0.002750602	0.155133523	0.763952558	0.283667253	1.289951877	5.441242313	5.433713844	0.04427431	-0.187804547141223	FAUX	-0.202694552618127	FAUX	-0.0880538496500835	FAUX	-0.039083379196925	FAUX	0.749776953209624	FAUX	0.0452070950449274	FAUX	0.00308895929951483	FAUX	-0.179697850037528	FAUX	-0.0948678441489586	FAUX	-0.0650870992236897	FAUX
10Q2F7	lo.sham	1	31448	5.413735704	5.408575735	0.004479635	4.848436912	4.846664875	0.020025973	0.895543934	0.894109775	0.000496424	13950	5.421810878	5.420056467	0.004250889	4.879074857	4.910731096	0.085096566	0.899867383	0.904676298	0.0027289	0.141146953	0.76078853	0.247705511	1.108285856	5.449788587	5.43638451	0.040491651	0.533827807373348	FAUX	0.375823099668237	FAUX	-0.125440331071451	FAUX	-0.077473298999451	FAUX	-1.16249159102989	FAUX	-0.123215743078506	FAUX	0.185533681382918	FAUX	0.454700439256355	FAUX	0.270884988280712	FAUX	-0.158062847850282	FAUX
10Q2G1	hi.sham	1	33655	5.410195147	5.404675529	0.004466761	4.851835556	4.849935101	0.02456823	0.896752729	0.895362486	0.000644891	13853	5.419094427	5.416530672	0.004210671	4.855075743	4.897890886	0.101280324	0.895862846	0.902537357	0.003250418	0.169854905	0.785966939	0.264070662	1.295111216	5.428851044	5.423545679	0.041307721	-0.543354563077602	FAUX	-0.219362147045874	FAUX	0.77298944581125	FAUX	0.806511464846079	FAUX	0.804085632534791	FAUX	-0.635551590137858	FAUX	-0.69154228156811	FAUX	-0.640311667456664	FAUX	-0.327569843977119	FAUX	0.776703429453866	FAUX
10Q2G11	lo.EMS	1	32229	5.410244286	5.404732825	0.004417333	4.849649597	4.84748937	0.020962493	0.896342314	0.894886287	0.000525832	15070	5.418811072	5.416255962	0.004379439	4.888393207	4.918258437	0.082796467	0.902073842	0.907040524	0.002630656	0.188453882	0.800132714	0.271577929	1.180840175	5.425159972	5.418011112	0.036930039	1.12734429527763	FAUX	1.03369652165505	FAUX	-0.294687288990571	FAUX	-0.253203745404741	FAUX	-0.39876405844734	FAUX	-0.675469900914804	FAUX	-1.06963244266158	FAUX	0.87987055447767	FAUX	0.621718315422759	FAUX	-0.290915488112265	FAUX
10Q2G12	lo.EMS	1	34561	5.410050904	5.40381518	0.004469314	4.84491651	4.84205666	0.022029779	0.895502694	0.894198977	0.000565579	14422	5.418638429	5.415854405	0.004211577	4.846522605	4.889721784	0.103242199	0.894358465	0.901034824	0.003316155	0.173068922	0.79933435	0.263073662	1.302517647	5.425563471	5.420109293	0.042454882	-0.948018745638856	FAUX	-0.637459455153535	FAUX	0.886235926743716	FAUX	0.912738013666273	FAUX	0.882047845547539	FAUX	-0.733820441924029	FAUX	-0.926296641994012	FAUX	-1.03056731024365	FAUX	-0.708314284068602	FAUX	0.890020409989912	FAUX
10Q2G2	hi.sham	1	31424	5.410861026	5.404891847	0.004444528	4.84894328	4.846522668	0.022199032	0.896115032	0.894699427	0.00057541	14302	5.416653122	5.413906346	0.004336183	4.876066623	4.904131045	0.074429567	0.900160924	0.904012529	0.00235816	0.162984198	0.777793316	0.279863588	1.159485549	5.437476445	5.423647205	0.039722578	0.612787544842261	FAUX	0.191121644122604	FAUX	-0.764121748551752	FAUX	-0.758575160219214	FAUX	-0.623548965107453	FAUX	-1.01689431828005	FAUX	-0.684606602282785	FAUX	0.317443178433061	FAUX	-0.0367293275364189	FAUX	-0.774183710831368	FAUX
10Q2G3	hi.sham	1	32449	5.410548211	5.404989282	0.004437102	4.846358509	4.84312684	0.021414962	0.895683495	0.894109122	0.000539855	14366	5.420226399	5.41770912	0.004236147	4.879019035	4.907937785	0.076726725	0.900112162	0.904310286	0.002432755	0.164764026	0.760963386	0.273737703	1.164990581	5.441280854	5.43073519	0.043817648	0.599671030561592	FAUX	0.273975997517979	FAUX	-0.63561540896891	FAUX	-0.617451189864063	FAUX	-0.565601422299588	FAUX	-0.464310450396316	FAUX	-0.200395752458717	FAUX	0.452153438320355	FAUX	0.14069471367078	FAUX	-0.641500941351039	FAUX
10Q2G4	hi.EMS	1	30798	5.412947267	5.408355309	0.00448079	4.84835294	4.84730114	0.021591991	0.895651978	0.894388516	0.000539629	14447	5.422158485	5.420560532	0.004200034	4.911707685	4.936709734	0.070122023	0.905813932	0.908929419	0.002198221	0.150827161	0.763134215	0.297499721	1.215590721	5.445102236	5.434105622	0.040790378	2.13339293758009	FAUX	1.55930355644098	FAUX	-1.03965195093181	FAUX	-1.0688870530952	FAUX	-0.032969862894676	FAUX	-0.0499696897067982	FAUX	0.0298530055443046	FAUX	1.94364464512512	FAUX	1.48169395842812	FAUX	-1.02298543347229	FAUX
10Q2G7	lo.sham	1	31248	5.413518091	5.408557088	0.004474369	4.85214989	4.849910558	0.019500991	0.896266852	0.894696004	0.000479275	13492	5.421196248	5.419797192	0.004299485	4.883585696	4.915384004	0.078161596	0.900790904	0.905158121	0.002480753	0.159353691	0.761784761	0.276799314	1.180194272	5.445631461	5.432553227	0.039928887	0.782246173826485	FAUX	0.509895961485149	FAUX	-0.552928267909893	FAUX	-0.527786876469396	FAUX	-0.405563018333899	FAUX	-0.160891182730128	FAUX	-0.0761977976406127	FAUX	0.660517342181741	FAUX	0.48774711722182	FAUX	-0.558623464866178	FAUX
10Q2G8	lo.sham	1	32211	5.411702609	5.406780252	0.004487167	4.848509485	4.845504226	0.021596806	0.895886736	0.894478456	0.000540211	13290	5.420386253	5.417950564	0.004302119	4.886690008	4.915381365	0.07737253	0.901510587	0.905338955	0.002465555	0.16109857	0.772535741	0.258498068	1.096249732	5.441075578	5.428372942	0.040613093	0.9758340567486	FAUX	0.560215128261719	FAUX	-0.579110174860494	FAUX	-0.556083428135526	FAUX	-1.2891872779452	FAUX	-0.429226046380332	FAUX	-0.361771109711183	FAUX	0.80215837205539	FAUX	0.48762411905417	FAUX	-0.604199547217834	FAUX
10Q2H1	hi.sham	1	30776	5.41261767	5.407072078	0.004460265	4.851692731	4.849385627	0.023282662	0.896325497	0.894903971	0.000599328	15163	5.418889768	5.416039401	0.004173407	4.880200992	4.924305136	0.106678167	0.900541946	0.907711085	0.003445803	0.196201279	0.786651718	0.245807531	1.242760913	5.419623851	5.418690656	0.04855383	0.715278839379924	FAUX	1.22028793031094	FAUX	1.10958320088054	FAUX	1.11919837602987	FAUX	0.253031356356708	FAUX	-0.706938538023638	FAUX	-1.0232098588479	FAUX	0.506082813572052	FAUX	0.903542073426586	FAUX	1.0884803113488	FAUX
10Q2H11	lo.EMS	1	31454	5.410646324	5.404840556	0.004431722	4.849519787	4.845761383	0.019840126	0.896256205	0.894437404	0.00049224	16155	5.419535772	5.416880052	0.004360395	4.870011649	4.910480328	0.101655718	0.898562211	0.904656595	0.003277199	0.177653977	0.772578149	0.243205837	1.174294406	5.431426708	5.425905755	0.043677884	0.182748951364222	FAUX	0.370340510426148	FAUX	0.81912562491666	FAUX	0.849916239910855	FAUX	-0.467666696858505	FAUX	-0.584782927114257	FAUX	-0.530315303010854	FAUX	0.0411717362526456	FAUX	0.259197226057542	FAUX	0.798386010959492	FAUX
10Q2H3	hi.sham	1	31660	5.411519986	5.406369835	0.004414939	4.849428951	4.846788494	0.021424564	0.896092259	0.894857827	0.00054375	14494	5.419829147	5.417580461	0.004247538	4.855809785	4.901733414	0.107727237	0.895881239	0.903072094	0.003473221	0.173589071	0.77604526	0.250294384	1.260506871	5.433818989	5.425882951	0.041147023	-0.53840702099227	FAUX	-0.0705653484094769	FAUX	1.15681675297763	FAUX	1.16236035463164	FAUX	0.439830390562427	FAUX	-0.483005983672244	FAUX	-0.531873142681665	FAUX	-0.606819394498784	FAUX	-0.14847780033563	FAUX	1.14907410288545	FAUX
10Q2H4	hi.EMS	1	30731	5.412520466	5.407588883	0.004525402	4.852454517	4.850220308	0.020945174	0.896484931	0.895072619	0.000522736	14773	5.419893583	5.4179066	0.00425701	4.879218437	4.910792435	0.08075359	0.900209754	0.904469927	0.002583143	0.162187775	0.771542679	0.258478048	1.125776648	5.439003084	5.428324351	0.040799644	0.625922350476251	FAUX	0.31839796519763	FAUX	-0.376538910581825	FAUX	-0.339367964856845	FAUX	-0.978378507188874	FAUX	-0.43561448733618	FAUX	-0.365090570658696	FAUX	0.461251591031433	FAUX	0.273743868389056	FAUX	-0.408911106205434	FAUX
10Q2H6	hi.EMS	1	32205	5.410929158	5.405782485	0.004466635	4.8493922	4.846340205	0.019979706	0.896183362	0.894714515	0.000492157	14842	5.420581691	5.417850186	0.004296544	4.854471474	4.907225886	0.116868078	0.895500503	0.903693227	0.003768902	0.177806226	0.776647352	0.253140283	1.320230015	5.430668152	5.426296501	0.046046158	-0.640821384249775	FAUX	0.102272143530353	FAUX	1.66619248853892	FAUX	1.61741982555073	FAUX	1.06849330179714	FAUX	-0.443812046886914	FAUX	-0.503621757140521	FAUX	-0.667882763235929	FAUX	0.107514617969127	FAUX	1.67704479504478	FAUX
10Q2H8	lo.sham	1	33951	5.409993645	5.403837459	0.004457542	4.847614652	4.845172484	0.021853369	0.896012613	0.894806605	0.000562049	13341	5.418195441	5.415382394	0.00429068	4.858864326	4.907443609	0.109896123	0.896715043	0.904412206	0.003548246	0.165055093	0.778127577	0.248785364	1.259078865	5.434151446	5.424232976	0.041888581	-0.314121674343838	FAUX	0.302336424638295	FAUX	1.28606386239787	FAUX	1.27960294679805	FAUX	0.424798790598087	FAUX	-0.802408705140263	FAUX	-0.644590056859475	FAUX	-0.467449275441414	FAUX	0.117662223144115	FAUX	1.27434794176249	FAUX
10Q3A1	hi.sham	1	35253	5.413481612	5.408889225	0.004450867	4.822758827	4.821172772	0.019853675	0.890842858	0.889494266	0.000494396	12615	5.423646178	5.422717844	0.004189129	4.846101847	4.890292444	0.097755996	0.893472415	0.900096884	0.003147385	0.151407055	0.758541419	0.244485434	1.181035189	5.444747902	5.43706212	0.043515195	-1.18635776943565	FAUX	-0.898452184874947	FAUX	0.59549237916819	FAUX	0.637832031438051	FAUX	-0.396711285254899	FAUX	0.263510892939555	FAUX	0.231824145308765	FAUX	-1.04976531496983	FAUX	-0.681717037249715	FAUX	0.573139895906295	FAUX
10Q3A11	lo.EMS	1	34209	5.412158593	5.408038039	0.0044396	4.820518802	4.81835128	0.019921378	0.890643544	0.889296684	0.000491573	12748	5.418197578	5.414964996	0.004273175	4.861457255	4.90796194	0.100990284	0.897215126	0.90526559	0.003274735	0.180734233	0.791339818	0.228457736	1.110632351	5.427891493	5.419705503	0.042225561	-0.179604103058533	FAUX	0.53980046248778	FAUX	0.81488084147632	FAUX	0.845930186687807	FAUX	-1.1377917129073	FAUX	-0.863061113431373	FAUX	-0.953881279807222	FAUX	-0.349141214283499	FAUX	0.141820526758985	FAUX	0.75995085498573	FAUX
10Q3A12	lo.EMS	1	35114	5.413483384	5.409021331	0.004426271	4.826110059	4.8244838	0.020594248	0.891461157	0.890290635	0.00051876	12011	5.422692451	5.421482176	0.004103004	4.828529447	4.879841055	0.109238425	0.890366679	0.898809186	0.00351701	0.156689701	0.786279244	0.260741233	1.345384542	5.436624235	5.430702168	0.04308327	-2.02177121834992	FAUX	-1.25676915192698	FAUX	1.23225296323292	FAUX	1.23094209991481	FAUX	1.33327705421567	FAUX	0.0839550731983518	FAUX	-0.202651627814406	FAUX	-1.85154452831929	FAUX	-1.16883401203877	FAUX	1.23635961352313	FAUX
10Q3A2	hi.sham	1	35324	5.414025598	5.410755307	0.004419467	4.818493435	4.818397465	0.019397385	0.889965483	0.888774647	0.000480209	11776	5.424548427	5.423526026	0.004367254	4.88438775	4.926928657	0.092748469	0.900372001	0.907511099	0.002949379	0.182914402	0.758576766	0.269683493	1.242806468	5.439385192	5.434151972	0.045660086	0.669565250531503	FAUX	1.16463949646011	FAUX	0.254383373531882	FAUX	0.305728816188763	FAUX	0.253510881328155	FAUX	0.380948409740217	FAUX	0.0330193741088132	FAUX	0.697112811507728	FAUX	1.02581879787113	FAUX	0.28390748324355	FAUX
10Q3A4	hi.EMS	1	33403	5.410931091	5.405250713	0.004477114	4.809386253	4.807751445	0.021468555	0.888787562	0.887450424	0.000543561	13464	5.425806524	5.425163999	0.004306846	4.878882035	4.914017711	0.082574208	0.899154813	0.904468121	0.002617556	0.142825312	0.735219846	0.27495559	1.20394075	5.460702349	5.446946261	0.042526462	0.342153253807667	FAUX	0.317895424662122	FAUX	-0.317254928222895	FAUX	-0.276882185486003	FAUX	-0.155600792784437	FAUX	0.618963462916893	FAUX	0.907052480779384	FAUX	0.44590251344791	FAUX	0.42406711135508	FAUX	-0.303753063787046	FAUX
10Q3A7	lo.sham	1	33165	5.411358249	5.405959029	0.004437995	4.81370162	4.812425336	0.021461608	0.889517169	0.888363394	0.000548366	12771	5.421811598	5.420127451	0.004244158	4.864323154	4.900498216	0.084009044	0.897138757	0.902440915	0.002681639	0.154020828	0.762587111	0.260406111	1.158559772	5.445865953	5.433278475	0.040963941	-0.200146637800734	FAUX	-0.246198256860787	FAUX	-0.206857827083579	FAUX	-0.161607761007402	FAUX	-0.633293958840102	FAUX	-0.11290100618441	FAUX	-0.0266529763108146	FAUX	-0.218378299385206	FAUX	-0.206047747547949	FAUX	-0.220877608885781	FAUX
10Q3A8	lo.sham	1	30686	5.413106927	5.408572345	0.004432628	4.817149308	4.813604337	0.01910415	0.889870761	0.888246564	0.000472681	13947	5.420220532	5.417761401	0.004285858	4.879028381	4.913374039	0.089426074	0.90009824	0.905745316	0.0028429	0.178031118	0.773284577	0.279664423	1.277469139	5.431263945	5.426096288	0.04431174	0.595926144957749	FAUX	0.673289809629744	FAUX	0.0709498118663351	FAUX	0.12252069791317	FAUX	0.618380079474038	FAUX	-0.45671346009476	FAUX	-0.517299171366985	FAUX	0.452579870027375	FAUX	0.394066930766994	FAUX	0.0920075051368626	FAUX
10Q3A9	lo.sham	1	33213	5.413423187	5.408973066	0.004503429	4.815030064	4.815859882	0.020956565	0.889427731	0.888377795	0.000534161	12093	5.422684052	5.420157162	0.004260467	4.853412748	4.899858789	0.096922715	0.894979681	0.902161342	0.003115559	0.164971471	0.768213016	0.246559878	1.175998021	5.439486466	5.430769822	0.042339201	-0.780917549310284	FAUX	-0.323992700456764	FAUX	0.540665074877506	FAUX	0.585171973193689	FAUX	-0.449733957659055	FAUX	-0.108583679070414	FAUX	-0.198029891053648	FAUX	-0.716189454378444	FAUX	-0.235850077729955	FAUX	0.525009975876703	FAUX
10Q3B10	lo.EMS	1	32767	5.412446844	5.407384105	0.004386449	4.817277974	4.817416613	0.021786847	0.88999895	0.888997016	0.000559179	13169	5.420468979	5.418363447	0.004220268	4.848226684	4.885739931	0.092552845	0.894379472	0.900470221	0.002960733	0.158326373	0.770825423	0.265166994	1.241779124	5.442257807	5.429900787	0.04096698	-0.9423680624123	FAUX	-0.794566816156272	FAUX	0.273943142680265	FAUX	0.325068010354969	FAUX	0.242696764276992	FAUX	-0.3692297160374	FAUX	-0.257397422993525	FAUX	-0.952814975895145	FAUX	-0.893899969130629	FAUX	0.272608332685851	FAUX
10Q3B2	hi.sham	1	32309	5.411328027	5.406443092	0.004450061	4.818146814	4.815982635	0.020239606	0.890343756	0.88915796	0.000506727	13122	5.419828331	5.416148528	0.004270701	4.867987671	4.887223329	0.059956351	0.898145684	0.900491736	0.001867666	0.150205761	0.765355891	0.305121802	1.14325014	5.447615846	5.430182325	0.03946788	0.070707149473826	FAUX	-0.788580016808806	FAUX	-1.60910584302654	FAUX	-1.74826731585717	FAUX	-0.794447528100492	FAUX	-0.691081213935867	FAUX	-0.238164346987088	FAUX	-0.0511766901818183	FAUX	-0.824761948704029	FAUX	-1.61014988388826	FAUX
10Q3B3	hi.sham	1	33163	5.411767243	5.406391132	0.004478619	4.810019387	4.808038707	0.022392131	0.888768222	0.887692331	0.000576385	13530	5.420253522	5.417604535	0.004275995	4.863512469	4.901659892	0.091902852	0.897239941	0.903559959	0.002945214	0.182039911	0.751071693	0.260345812	1.206970107	5.440475797	5.429437341	0.047399423	-0.172929104045461	FAUX	0.0651887702820461	FAUX	0.247208242432444	FAUX	0.298625269162443	FAUX	-0.123712913760698	FAUX	-0.47950777314612	FAUX	-0.289057419665039	FAUX	-0.255367576978159	FAUX	-0.151904504118303	FAUX	0.235065041635419	FAUX
10Q3B4	hi.EMS	1	29592	5.414327444	5.411004862	0.004461299	4.810848972	4.809256613	0.021722303	0.888501539	0.887143907	0.000552905	13965	5.423634708	5.421230339	0.004289161	4.887123666	4.911338749	0.0722172	0.901034328	0.903808044	0.002274978	0.163766559	0.754027927	0.294270099	1.207480933	5.446000856	5.435629394	0.043273539	0.847724914900612	FAUX	0.134221311119361	FAUX	-0.907421089515356	FAUX	-0.918603308481416	FAUX	-0.118335813045867	FAUX	0.0473604547603391	FAUX	0.13394844805136	FAUX	0.821944967517724	FAUX	0.299206400016628	FAUX	-0.90196899189035	FAUX
10Q3B5	hi.EMS	1	31950	5.41308758	5.407778282	0.004471349	4.811920736	4.810245963	0.02043716	0.88890293	0.8877122	0.000509485	12751	5.421453969	5.419139234	0.004120938	4.85032835	4.874875925	0.071207003	0.894612685	0.897845582	0.002245865	0.156458317	0.772645283	0.286570836	1.191229085	5.442584383	5.430289569	0.041873904	-0.879635983233113	FAUX	-1.52490318857162	FAUX	-0.95757465294823	FAUX	-0.975301164692264	FAUX	-0.289407417659048	FAUX	-0.256499540351411	FAUX	-0.230838046440631	FAUX	-0.856921864413327	FAUX	-1.40024814321638	FAUX	-0.960317497165442	FAUX
10Q3B6	hi.EMS	1	35174	5.413402311	5.408948508	0.004462724	4.813935791	4.812090759	0.019167933	0.889222575	0.887903811	0.000464806	11655	5.440426365	5.442892701	0.004231238	4.92772941	4.964207757	0.087710897	0.905706387	0.911451989	0.002764508	0.117975118	0.677048477	0.283292588	1.289817518	5.485004985	5.481062634	0.04434621	2.10446435531696	FAUX	2.26123804075055	FAUX	-0.0640976976527776	FAUX	-0.014563822177907	FAUX	0.748362651911444	FAUX	3.19513410143485	VRAI	3.23768917981933	VRAI	2.6746709174045	VRAI	2.76331822640244	VRAI	-0.00706031453812851	FAUX
10Q3B7	lo.sham	1	31499	5.414251635	5.409936503	0.004427166	4.814499669	4.814200967	0.020922698	0.889186486	0.88796153	0.000524748	13177	5.424221679	5.42335894	0.00423101	4.886090572	4.903865595	0.057369996	0.900757722	0.902748561	0.001778514	0.145101313	0.745920923	0.307496578	1.132297788	5.454256411	5.441371454	0.0413965	0.773320531382376	FAUX	-0.1605921740326	FAUX	-1.7626898256861	FAUX	-1.9416117343869	FAUX	-0.909735120682477	FAUX	0.356669021023092	FAUX	0.526213351594591	FAUX	0.774807792479807	FAUX	-0.0491013864998345	FAUX	-1.75953653655181	FAUX
10Q3B8	lo.sham	1	33815	5.411419104	5.406021272	0.004487847	4.811314509	4.810037512	0.019950603	0.889066795	0.887867276	0.000496823	13194	5.420499941	5.418108966	0.004286993	4.855467414	4.890437756	0.08525495	0.89571581	0.900619906	0.002716775	0.169319388	0.772017584	0.269049603	1.199819078	5.439599543	5.428277374	0.042193509	-0.582905848787189	FAUX	-0.752915221439818	FAUX	-0.146328317765491	FAUX	-0.098988395383916	FAUX	-0.19898669220518	FAUX	-0.406208536046906	FAUX	-0.368299772299482	FAUX	-0.622440820772596	FAUX	-0.674944354514387	FAUX	-0.148914662239465	FAUX
10Q3B9	lo.sham	1	33825	5.410863412	5.404790969	0.004527501	4.811118597	4.80922966	0.020333764	0.889123833	0.88806176	0.000511081	12514	5.420764809	5.418042627	0.00428374	4.825542627	4.879537408	0.110560253	0.890135534	0.899132708	0.003558879	0.18211603	0.779766661	0.256579033	1.303494332	5.429494712	5.42450759	0.043775779	-2.08394702519547	FAUX	-1.16674538718198	FAUX	1.3043815500282	FAUX	1.29611861302812	FAUX	0.89232871146209	FAUX	-0.415848304597845	FAUX	-0.62582998917963	FAUX	-1.98782472852055	FAUX	-1.18298635179416	FAUX	1.31270777930739	FAUX
10Q3C1	hi.sham	1	33321	5.416117778	5.412758655	0.004477357	4.848425468	4.847887162	0.01868906	0.895152124	0.893804804	0.000456815	12877	5.425897629	5.425013864	0.00430437	4.858078079	4.902323868	0.104973481	0.895302282	0.902461773	0.003378333	0.155936942	0.756930962	0.247197562	1.220756831	5.443519901	5.43886024	0.04494392	-0.694140948197656	FAUX	-0.240394275415793	FAUX	0.993351245231308	FAUX	1.01224873792536	FAUX	0.0214100899148875	FAUX	0.597147236392694	FAUX	0.354661483887459	FAUX	-0.503323515793226	FAUX	-0.120957997347514	FAUX	0.990018446917038	FAUX
10Q3C11	lo.EMS	1	41859	5.412096154	5.407610121	0.004391349	4.829550602	4.829798908	0.021394804	0.892323144	0.89158637	0.000544768	9445	5.430496247	5.432224262	0.004132626	4.852445612	4.905849825	0.120145413	0.893479123	0.902308631	0.003863016	0.141979884	0.729592377	0.265408109	1.431049812	5.456285146	5.451956744	0.04249007	-1.18455338122772	FAUX	-0.283007820647876	FAUX	1.82832461057793	FAUX	1.75848921254655	FAUX	2.23501421041608	FAUX	1.64489543700139	FAUX	1.24934020168444	FAUX	-0.760317151294167	FAUX	0.0433793464329409	FAUX	1.86634212866955	FAUX
10Q3C3	hi.sham	1	30805	5.414994152	5.410981262	0.004410054	4.827130736	4.826602765	0.020763143	0.891398676	0.890055634	0.000520948	13278	5.425386912	5.424181466	0.004335117	4.87211669	4.897679311	0.069431081	0.897972765	0.901596844	0.002164316	0.137520711	0.740774213	0.307695167	1.231394494	5.45992489	5.444790111	0.040047309	0.0241935829076887	FAUX	-0.4810708439865	FAUX	-1.09806079125028	FAUX	-1.13610490123305	FAUX	0.133385175993974	FAUX	0.476190874942145	FAUX	0.759756567505262	FAUX	0.137218839496849	FAUX	-0.337430903970283	FAUX	-1.06289391957132	FAUX
10Q3C6	hi.EMS	1	31555	5.413916461	5.410037882	0.004445655	4.823698462	4.822886948	0.0209741	0.890936901	0.889854364	0.00051875	12900	5.421398258	5.419188864	0.004302389	4.896853964	4.920905603	0.071454393	0.903202141	0.907084602	0.002238377	0.144883721	0.754806202	0.294261927	1.199205778	5.44973934	5.436312159	0.04119011	1.43084599632258	FAUX	1.04596173855661	FAUX	-0.97047438444225	FAUX	-0.989943441242065	FAUX	-0.20544246358018	FAUX	-0.249287768796546	FAUX	0.180591072278126	FAUX	1.26591111193146	FAUX	0.745097082941989	FAUX	-0.946028366708705	FAUX
10Q3C7	lo.sham	1	32743	5.414740437	5.410530923	0.004534614	4.823773328	4.82309585	0.021146912	0.890818203	0.889689854	0.000527045	13619	5.424192541	5.423275372	0.004323681	4.867482555	4.898851284	0.077297368	0.897317318	0.902076971	0.002436407	0.151846685	0.71576474	0.289418465	1.223719153	5.46279572	5.446861679	0.045530262	-0.152115426889182	FAUX	-0.347469913923864	FAUX	-0.629324033512692	FAUX	-0.610598030572927	FAUX	0.0525923393379015	FAUX	0.344525693896289	FAUX	0.90127431927092	FAUX	-0.074223713305036	FAUX	-0.282807739308205	FAUX	-0.608540869111966	FAUX
10Q3C9	lo.sham	1	31607	5.412933103	5.407912424	0.004400763	4.825460606	4.824382949	0.021269708	0.891431428	0.890421293	0.000542218	12789	5.422420144	5.419266606	0.004292228	4.849263419	4.880927865	0.086426768	0.894259636	0.899209404	0.002761012	0.144733756	0.752365314	0.258829582	1.161439609	5.452522639	5.436908103	0.037973931	-0.974602806789826	FAUX	-1.14540383185997	FAUX	-0.0701203287028696	FAUX	-0.020722280507104	FAUX	-0.602979970140822	FAUX	-0.237991021985628	FAUX	0.221302579242066	FAUX	-0.905511672262658	FAUX	-1.1181801133684	FAUX	-0.0812310037506274	FAUX
10Q3D1	hi.sham	1	34224	5.415488326	5.411800624	0.004406597	4.850673953	4.849404057	0.020907059	0.895666649	0.894379975	0.000528471	12955	5.42490074	5.424232158	0.004137325	4.860574147	4.901801479	0.098075728	0.895911724	0.901861803	0.003130192	0.15499807	0.76896951	0.275934131	1.343465073	5.441895004	5.43611492	0.043135567	-0.530206845900092	FAUX	-0.407342916108111	FAUX	0.565873644716178	FAUX	0.609417324236597	FAUX	1.31307217401772	FAUX	0.483556966492797	FAUX	0.167116824828595	FAUX	-0.389434949774533	FAUX	-0.145305435696887	FAUX	0.591607466378803	FAUX
10Q3D2	hi.sham	1	31639	5.415635962	5.411155706	0.004476659	4.838242751	4.836621562	0.022658814	0.893342023	0.892192442	0.000579189	12891	5.424950101	5.424670969	0.004143523	4.86696566	4.891403636	0.066861763	0.897096098	0.900412971	0.002086434	0.139011714	0.756108913	0.309377156	1.242774348	5.454657331	5.440644648	0.040027386	-0.211621503120013	FAUX	-0.810497295479633	FAUX	-1.23222971328783	FAUX	-1.29253116738855	FAUX	0.253172777012869	FAUX	0.547320913456302	FAUX	0.476562096559856	FAUX	-0.0978081790856907	FAUX	-0.629926745504791	FAUX	-1.21129652309953	FAUX
10Q3D3	hi.sham	1	30784	5.414896618	5.410669279	0.004479787	4.836013305	4.834795701	0.0214499	0.89305235	0.891753717	0.000536518	13170	5.426762544	5.42520071	0.004188777	4.874994907	4.895941619	0.059857216	0.898292727	0.900515018	0.001867623	0.139787396	0.744798785	0.296826008	1.122061366	5.458234193	5.444326683	0.041847014	0.110260318116821	FAUX	-0.782101529130087	FAUX	-1.60917992001028	FAUX	-1.74835944424898	FAUX	-1.01748662912863	FAUX	0.624297965144562	FAUX	0.728097800491484	FAUX	0.268543790107378	FAUX	-0.41842102596795	FAUX	-1.61587587502706	FAUX
10Q3D5	hi.EMS	1	32302	5.414491425	5.409836791	0.004538822	4.833186635	4.83128734	0.019374786	0.892600942	0.891234972	0.000471569	11974	5.428034214	5.427648371	0.004246329	4.852786399	4.880973566	0.072915467	0.893975182	0.898187921	0.002282932	0.126106564	0.728662101	0.295351524	1.223889538	5.467782771	5.451835536	0.039052678	-1.05111822767475	FAUX	-1.4296433744043	FAUX	-0.893718570244065	FAUX	-0.903176005163082	FAUX	0.0543858606255751	FAUX	0.979969373082078	FAUX	1.24105996002399	FAUX	-0.744767998487515	FAUX	-1.1160500871236	FAUX	-0.861637417224297	FAUX
10Q3D6	hi.EMS	1	34389	5.414436805	5.41055286	0.004409245	4.831161204	4.830912504	0.021520146	0.892233562	0.89116268	0.000544682	11740	5.431935362	5.433004546	0.004366447	4.923826017	4.944788545	0.069676001	0.906407729	0.909321108	0.002160981	0.122657581	0.695400341	0.313254167	1.251337173	5.47646008	5.466113992	0.039796236	2.29311868365925	FAUX	1.66829558291585	FAUX	-1.10380606429148	FAUX	-1.14274500769559	FAUX	0.343307524321106	FAUX	1.75827907504245	FAUX	2.2164829207012	FAUX	2.49657006783731	FAUX	1.85823012737299	FAUX	-1.04874745515698	FAUX
10Q3D7	lo.sham	1	32617	5.414880548	5.41109588	0.004486296	4.833793926	4.832671743	0.021390944	0.892649265	0.891494491	0.000542598	12200	5.42227321	5.421386725	0.00426044	4.867106581	4.888258143	0.069733506	0.897584406	0.900373498	0.002203801	0.158196721	0.757786885	0.272007076	1.100458651	5.445832592	5.434550542	0.041858845	-0.0802712948561982	FAUX	-0.821481117494135	FAUX	-1.03003917025117	FAUX	-1.05787431474865	FAUX	-1.24488299162545	FAUX	0.0700850186609642	FAUX	0.0602474111904751	FAUX	-0.0913783500057528	FAUX	-0.776531472817123	FAUX	-1.04542599330761	FAUX
10Q3D8	lo.sham	1	31324	5.415347705	5.411846894	0.004483958	4.834295841	4.832579161	0.021321875	0.892663437	0.891331006	0.000537482	13083	5.424391042	5.42284335	0.004321733	4.870741887	4.895414258	0.075384839	0.897883947	0.901856151	0.002371877	0.154398838	0.751203852	0.295506619	1.234185019	5.448339956	5.438855497	0.044096289	0.00030238555359729	FAUX	-0.408915650940149	FAUX	-0.74049119073879	FAUX	-0.732458690846912	FAUX	0.162759041013092	FAUX	0.281748261482237	FAUX	0.354337469084793	FAUX	0.074490443384166	FAUX	-0.443000198644613	FAUX	-0.719007647814801	FAUX
10Q3D9	lo.sham	1	32099	5.414349427	5.409867214	0.004494044	4.834580309	4.83356781	0.021740435	0.89288063	0.891797187	0.00055042	12120	5.425495247	5.423588258	0.004127627	4.860222425	4.897187077	0.085368215	0.895766023	0.90145513	0.002720424	0.144059406	0.746947195	0.268628353	1.221658302	5.452428509	5.441354159	0.042397969	-0.569399029305332	FAUX	-0.520504415110163	FAUX	-0.14004211047093	FAUX	-0.0925084191552563	FAUX	0.0308992317332356	FAUX	0.389991387120897	FAUX	0.525031855492698	FAUX	-0.405483035891287	FAUX	-0.360372882014389	FAUX	-0.142372528922911	FAUX
10Q3E1	hi.sham	1	32258	5.413769998	5.409517218	0.004485049	4.85521465	4.853628257	0.022311091	0.896788622	0.895415267	0.000573281	13462	5.421987917	5.420406322	0.00424335	4.881344324	4.912949701	0.079708033	0.900250823	0.904725771	0.00253941	0.17025702	0.762813846	0.265220652	1.149486746	5.439054958	5.431458652	0.043961279	0.636969520916193	FAUX	0.389589538158421	FAUX	-0.451878648486194	FAUX	-0.419380335084439	FAUX	-0.728799227934246	FAUX	-0.0723780574578828	FAUX	-0.150972940498006	FAUX	0.558249838654405	FAUX	0.374289440631651	FAUX	-0.469301988508499	FAUX
10Q3E3	hi.sham	1	31846	5.413607475	5.409846931	0.004427075	4.848799846	4.846797764	0.020026464	0.895628426	0.894265841	0.000491958	13227	5.422232762	5.420422818	0.004298963	4.887158406	4.908790526	0.065577545	0.90129321	0.903963605	0.002068331	0.152037499	0.756634157	0.275100633	1.074452791	5.448195571	5.435470087	0.0410853	0.917361710971413	FAUX	0.177507971276908	FAUX	-1.26341612344224	FAUX	-1.32930725191141	FAUX	-1.51862811892087	FAUX	-0.0699810116475149	FAUX	0.123065499250934	FAUX	0.823530056058387	FAUX	0.180439154931041	FAUX	-1.28547235291032	FAUX
10Q3E4	hi.EMS	1	41520	5.41397726	5.409473238	0.004470704	4.845117102	4.845631274	0.023254113	0.894888068	0.893956327	0.000603959	8790	5.436546834	5.439215813	0.004235244	4.871475667	4.937046231	0.129333	0.895987585	0.909052429	0.004171399	0.131285552	0.623549488	0.253587825	1.4013411	5.502680559	5.489677289	0.060426962	-0.509800958326874	FAUX	1.59353252170852	FAUX	2.35958234259181	FAUX	2.20907808183506	FAUX	1.92229180291936	FAUX	2.66084282017132	VRAI	3.82619344703933	VRAI	0.107970762018592	FAUX	1.49737736669717	FAUX	2.39701284788063	FAUX
10Q3E6	hi.EMS	1	34352	5.412717052	5.408055011	0.004412952	4.844811597	4.84340098	0.021118242	0.895040936	0.893815434	0.000534958	12349	5.429998806	5.43138387	0.004269368	4.896847486	4.924615217	0.075658498	0.901769882	0.905996391	0.00238373	0.124625476	0.746214268	0.285862635	1.203384565	5.461479318	5.451686674	0.03963231	1.04558194589186	FAUX	0.743154352793272	FAUX	-0.720071784034917	FAUX	-0.709951941108095	FAUX	-0.161455355318604	FAUX	1.52277746157122	FAUX	1.23089055425827	FAUX	1.26561553900211	FAUX	0.917994288214468	FAUX	-0.703201232229448	FAUX
10Q3E9	lo.sham	1	30417	5.414881164	5.410652408	0.004464825	4.847522802	4.845947186	0.020672409	0.895180081	0.893935275	0.000509147	13055	5.422171453	5.419565864	0.004296402	4.869078766	4.897638086	0.068796425	0.897957077	0.901976454	0.002164918	0.149674454	0.751666028	0.287798499	1.151645982	5.450538189	5.436536329	0.041664987	0.019973660098238	FAUX	-0.37543993995259	FAUX	-1.09702371347792	FAUX	-1.13490684252243	FAUX	-0.706070491654006	FAUX	-0.194505623396279	FAUX	0.195905092582218	FAUX	-0.00139309256339803	FAUX	-0.33935231339116	FAUX	-1.09955135268968	FAUX
10Q3F1	hi.sham	1	33191	5.414475471	5.410103766	0.00444974	4.859800563	4.859138297	0.021179697	0.897513766	0.896199432	0.000525743	13101	5.423512812	5.420798749	0.00430645	4.879211129	4.914708002	0.087744415	0.899584212	0.904348993	0.002777889	0.171055645	0.773681398	0.284234486	1.283000495	5.437295904	5.429879805	0.042029187	0.457657501287293	FAUX	0.284746671110478	FAUX	-0.0410459739453174	FAUX	0.00897188275793127	FAUX	0.676604716241916	FAUX	-0.0153542034181034	FAUX	-0.258830793979958	FAUX	0.460918147535325	FAUX	0.456240104212241	FAUX	-0.00512433056687227	FAUX
10Q3F10	lo.EMS	1	33510	5.412802746	5.407829227	0.004432156	4.8525589	4.850217242	0.020457284	0.896459886	0.895127622	0.000512881	13705	5.426615917	5.428297624	0.004366184	4.866501595	4.913321019	0.099106975	0.896680907	0.903348431	0.003084256	0.163298066	0.753155783	0.333738551	1.590037891	5.446367723	5.442498583	0.042941468	-0.323303933715579	FAUX	0.00632864049494496	FAUX	0.486738753435563	FAUX	0.533114256096517	FAUX	3.9085682449417	VRAI	1.07431280079433	FAUX	0.603212398707568	FAUX	-0.118982160479415	FAUX	0.391595781525166	FAUX	0.651171809788477	FAUX
10Q3F2	hi.sham	1	33385	5.414349172	5.410145149	0.00440988	4.854716178	4.853384847	0.020288827	0.896600921	0.895143265	0.000505062	13651	5.423895189	5.422424034	0.004204325	4.872394012	4.90317141	0.078855371	0.89828405	0.902438695	0.002510585	0.140795546	0.764559373	0.265369399	1.149260153	5.45073584	5.437449305	0.038739548	0.107926287633807	FAUX	-0.246815997718406	FAUX	-0.501536068400069	FAUX	-0.472494792538677	FAUX	-0.731184410721097	FAUX	0.220817147209932	FAUX	0.258274423898405	FAUX	0.14987226276312	FAUX	-0.0814558704008872	FAUX	-0.518551346014878	FAUX
10Q3F8	lo.sham	1	31153	5.412771311	5.408236572	0.004424619	4.852378118	4.852229836	0.021001093	0.896433015	0.895111609	0.000535265	13400	5.420506846	5.418356818	0.00430309	4.889351614	4.907142529	0.060552891	0.901981241	0.904256342	0.001896759	0.143731343	0.775373134	0.292874518	1.098648663	5.447015754	5.431125641	0.037494236	1.10243550689932	FAUX	0.258965451201509	FAUX	-1.55898673400471	FAUX	-1.68617618580098	FAUX	-1.26393544347528	FAUX	-0.370192980869855	FAUX	-0.173722359311747	FAUX	0.923599971661914	FAUX	0.10362952578974	FAUX	-1.57569401306623	FAUX
10Q3F9	lo.sham	1	33261	5.410398812	5.404676385	0.004407808	4.848815804	4.846751412	0.021991251	0.896164691	0.89476198	0.000564357	13869	5.419290467	5.416236809	0.004294725	4.840395797	4.895101956	0.124281105	0.893106648	0.902193196	0.004014047	0.177590309	0.783113418	0.257719304	1.386378481	5.430353504	5.422345214	0.044508134	-1.28474561404609	FAUX	-0.315128953935068	FAUX	2.08850881828	FAUX	1.98132812866602	FAUX	1.76479099183955	FAUX	-0.67825303733619	FAUX	-0.773551227387566	FAUX	-1.31011633590792	FAUX	-0.457555929510648	FAUX	2.10521776033165	FAUX
10Q3G1	hi.sham	1	31272	5.414174324	5.410330059	0.004464539	4.862102911	4.858849873	0.019414904	0.897990734	0.896478134	0.000466004	14339	5.422907907	5.421577605	0.004229625	4.887692451	4.92683358	0.093660592	0.901265219	0.906988467	0.003003644	0.169677104	0.766510914	0.249734284	1.175183457	5.43647389	5.432319768	0.045016159	0.909832398161658	FAUX	1.01921105506752	FAUX	0.34786680429082	FAUX	0.397825221059232	FAUX	-0.458308291515744	FAUX	0.097821930899791	FAUX	-0.0921463896295672	FAUX	0.847897028127848	FAUX	1.021387461461	FAUX	0.336591280242584	FAUX
10Q3G10	lo.EMS	1	31488	5.411138709	5.405668162	0.004478511	4.857262279	4.855909663	0.02225493	0.897603446	0.896238435	0.000570025	13313	5.415477222	5.411358714	0.004325063	4.872185411	4.909052983	0.089821394	0.899630595	0.905331098	0.002868996	0.182152783	0.788552543	0.268110412	1.221820376	5.427086147	5.416392506	0.040660099	0.470134087191868	FAUX	0.55802882649678	FAUX	0.115905927393567	FAUX	0.167734608403903	FAUX	0.032605269055641	FAUX	-1.38709258525684	FAUX	-1.18020640504869	FAUX	0.140354385541812	FAUX	0.192671716540998	FAUX	0.114841003063851	FAUX
10Q3G11	lo.EMS	1	33558	5.413466649	5.409032338	0.004461481	4.859067981	4.857838878	0.020490689	0.897553596	0.896150375	0.00051546	13682	5.425141162	5.424997542	0.004233564	4.874206742	4.899360804	0.070853977	0.89840786	0.90208429	0.002226752	0.142230668	0.754933489	0.287507105	1.176190346	5.453290581	5.440648585	0.038459969	0.141230000219175	FAUX	-0.345433316925286	FAUX	-0.990501010860247	FAUX	-1.01272395232988	FAUX	-0.447709489650418	FAUX	0.594775474649332	FAUX	0.47683105002345	FAUX	0.232582036807365	FAUX	-0.259060097631647	FAUX	-0.980708113474187	FAUX
10Q3G12	lo.EMS	1	36783	5.409154009	5.40309048	0.004385015	4.855104242	4.8522573	0.022053601	0.89753368	0.896241475	0.000567745	13142	5.410536821	5.40540186	0.004143359	4.864939065	4.909347389	0.104766942	0.899117963	0.90697781	0.003400866	0.207654847	0.817151119	0.237978526	1.196667909	5.411400594	5.401667584	0.040092224	0.332240954245672	FAUX	1.01624562068937	FAUX	1.03216930743146	FAUX	1.04808457589008	FAUX	-0.232156799213152	FAUX	-2.25268739150605	FAUX	-2.18612938530515	FAUX	-0.190276011873367	FAUX	0.206393352974183	FAUX	0.97808885107483	FAUX
10Q3G2	hi.sham	1	33839	5.413543044	5.407749411	0.004534684	4.856955548	4.856311913	0.0203182	0.897149517	0.895745199	0.000504235	13216	5.422167482	5.420177793	0.004332419	4.868483406	4.903936036	0.086814488	0.897840299	0.90322976	0.00276741	0.156401332	0.761425545	0.268436956	1.201636681	5.446283492	5.434358888	0.040019235	-0.0114385113604406	FAUX	-0.0266929474837724	FAUX	-0.0590983626106246	FAUX	-0.00945469521482969	FAUX	-0.179854082685343	FAUX	-0.105585773389384	FAUX	0.0471546991979731	FAUX	-0.0285576957171997	FAUX	-0.0458182815631454	FAUX	-0.0588364782617788	FAUX
10Q3G3	hi.sham	1	32062	5.415398503	5.411339344	0.004509416	4.858752256	4.858525167	0.020721087	0.897174229	0.895828954	0.000519465	13420	5.424540686	5.423763441	0.004275725	4.874020478	4.903686732	0.079280967	0.898464907	0.902704985	0.002506003	0.144411326	0.739344262	0.285365404	1.228799167	5.457695374	5.443149508	0.042200779	0.156575100710745	FAUX	-0.172717703587104	FAUX	-0.509429573969726	FAUX	-0.480965858271004	FAUX	0.106066021003976	FAUX	0.415447356822956	FAUX	0.64767989510068	FAUX	0.224083334103396	FAUX	-0.0574378098653673	FAUX	-0.493969120517219	FAUX
10Q3G4	hi.EMS	1	33912	5.412692267	5.408092348	0.004463664	4.854185469	4.852528788	0.021008394	0.896773768	0.895271061	0.000523067	13357	5.423597006	5.421830885	0.004098921	4.86854179	4.901578185	0.086113629	0.897620214	0.902634071	0.002755342	0.127423823	0.750243318	0.25694614	1.17772329	5.456858519	5.441494041	0.039600009	-0.0706392833849256	FAUX	-0.192450350062831	FAUX	-0.0798881542331966	FAUX	-0.0307186935192512	FAUX	-0.431573282256517	FAUX	0.134626232721977	FAUX	0.534587798697305	FAUX	-0.0258937979233796	FAUX	-0.155712693312957	FAUX	-0.0993177656330498	FAUX
10Q3G6	hi.EMS	1	35424	5.414687924	5.410222838	0.00446833	4.860217039	4.859429531	0.019427182	0.897563447	0.89626961	0.00047931	11709	5.412612186	5.406582756	0.004771526	4.859235025	4.889212032	0.087473737	0.897694982	0.903506566	0.002752816	0.263045521	0.787343069	0.305136337	1.306484151	5.412379605	5.395312412	0.045938863	-0.0505274024174582	FAUX	0.0503315461333758	FAUX	-0.0842397463477655	FAUX	-0.0351754335532218	FAUX	0.923800402178921	FAUX	-2.0810905310961	FAUX	-2.62027861599598	VRAI	-0.450535322161858	FAUX	-0.732072738770914	FAUX	-0.0207585649893186	FAUX
10Q3G8	lo.sham	1	32097	5.412546474	5.407326308	0.004453082	4.856236823	4.855331345	0.020422677	0.897182091	0.895790536	0.000511389	12971	5.420217891	5.416760296	0.004300451	4.884890255	4.915858689	0.079984373	0.901194536	0.905994457	0.002541346	0.149872793	0.768252255	0.2731235	1.177889798	5.44503645	5.429577881	0.038194286	0.890819343346432	FAUX	0.742616194766893	FAUX	-0.448543461497357	FAUX	-0.415823789900344	FAUX	-0.42982057138075	FAUX	-0.602184758956583	FAUX	-0.279456525640232	FAUX	0.720040702040848	FAUX	0.509871173763771	FAUX	-0.45334071961964	FAUX
10Q3H1	hi.sham	1	34404	5.415792311	5.412440386	0.00443223	4.859998871	4.857145468	0.022138717	0.89733048	0.895941512	0.000554299	13322	5.425323474	5.424954285	0.004171915	4.859758651	4.915463153	0.120038773	0.895696477	0.904807055	0.003890433	0.151779012	0.760096082	0.243074911	1.3038667	5.444636175	5.439346117	0.04223829	-0.588106241933248	FAUX	0.412207757919486	FAUX	1.87555643995446	FAUX	1.79926104985914	FAUX	0.896248363631281	FAUX	0.588489768379933	FAUX	0.387853838989788	FAUX	-0.426643739773051	FAUX	0.491436083486277	FAUX	1.86018265224808	FAUX
10Q3H12	lo.EMS	1	30448	5.413356253	5.409596711	0.004436842	4.858522747	4.85697647	0.022521681	0.897466457	0.896121635	0.00057603	12547	5.42093434	5.419741025	0.00420824	4.868373659	4.908426037	0.096982265	0.898020279	0.904237648	0.003113133	0.159320953	0.762413326	0.258005762	1.238583597	5.444145906	5.432622999	0.042438312	0.0369743970566489	FAUX	0.253763627961817	FAUX	0.536485754818146	FAUX	0.581146846860538	FAUX	0.20905973226225	FAUX	-0.169052850530297	FAUX	-0.0714313711577324	FAUX	-0.033565142811921	FAUX	0.163451099178469	FAUX	0.528449555967647	FAUX
10Q3H2	hi.sham	1	31976	5.416445234	5.413436403	0.00443752	4.860144116	4.859960456	0.0225226	0.89725157	0.896042779	0.000572885	14023	5.424926723	5.424068615	0.004275641	4.861043998	4.922886277	0.132598211	0.895997459	0.906275084	0.004306176	0.16458675	0.753048563	0.234368073	1.305168768	5.44407545	5.437902698	0.045126123	-0.50714494622712	FAUX	0.820703926139393	FAUX	2.59176545044028	VRAI	2.40075985850363	FAUX	0.909954304154197	FAUX	0.459792413693986	FAUX	0.289247656747267	FAUX	-0.367996969466121	FAUX	0.83741207829079	FAUX	2.5856099049475	VRAI
10Q3H5	hi.EMS	1	32438	5.412376835	5.407593981	0.00446307	4.853881396	4.852049756	0.022613048	0.896768161	0.895368365	0.000576054	14880	5.41325976	5.409579799	0.004107784	4.867853823	4.912179529	0.109657167	0.899197141	0.906330358	0.00355454	0.196102151	0.811827957	0.241719255	1.248895046	5.4139411	5.408564716	0.04144131	0.353539083274715	FAUX	0.836084560447137	FAUX	1.2969066655527	FAUX	1.28938206184093	FAUX	0.31760099638907	FAUX	-1.64558802341239	FAUX	-1.71495652770618	FAUX	-0.0572837981550234	FAUX	0.338393364549621	FAUX	1.26054595519302	FAUX
10Q3H7	lo.sham	1	32949	5.41504972	5.410978733	0.004427073	4.859382623	4.857483267	0.019803871	0.8973449	0.895817122	0.000484158	13060	5.42319357	5.422212992	0.004388824	4.878946052	4.93079117	0.122105295	0.899596692	0.908121431	0.003966817	0.165237366	0.751454824	0.231379784	1.220445991	5.442527257	5.437043069	0.043560077	0.461014502604351	FAUX	1.33447148434452	FAUX	2.00714472660499	FAUX	1.91210008948768	FAUX	0.0181380990878771	FAUX	0.190150480022899	FAUX	0.230522689267264	FAUX	0.448823429196512	FAUX	1.20584229978491	FAUX	1.97954399445965	FAUX
10Q3H9	lo.sham	1	33483	5.413432932	5.408982381	0.004443671	4.855680211	4.854245297	0.021003589	0.896930177	0.895519405	0.000528615	13234	5.421462375	5.420357656	0.004312605	4.867627359	4.917463496	0.112614125	0.897791062	0.906098422	0.003634109	0.162233641	0.764319178	0.246109016	1.257633575	5.4401621	5.431778559	0.043216768	-0.0246827961239005	FAUX	0.771545666956459	FAUX	1.43398181716161	FAUX	1.41227135633649	FAUX	0.409585254301699	FAUX	-0.0794497494685664	FAUX	-0.129118712486161	FAUX	-0.0676167138507636	FAUX	0.58466780902059	FAUX	1.43133846344758	FAUX
10Q4A10	lo.EMS	1	32548	5.41392471	5.409540898	0.004476294	4.836274556	4.836311454	0.020887222	0.893271483	0.892162273	0.000536989	12390	5.421927578	5.420346933	0.00427161	4.885193821	4.925621455	0.094660817	0.900957989	0.908552008	0.003026709	0.181194512	0.781275222	0.2625964	1.236169725	5.430247784	5.426995709	0.041528648	0.827190449873096	FAUX	1.4542845497701	FAUX	0.387601353824679	FAUX	0.436718093975274	FAUX	0.183650624549033	FAUX	-0.0810079164317574	FAUX	-0.455855840609445	FAUX	0.733891565251293	FAUX	0.964892897622038	FAUX	0.394363807471212	FAUX
10Q4A6	hi.EMS	1	35346	5.41350134	5.408783342	0.004496067	4.833546401	4.833781191	0.020360549	0.892832026	0.891751462	0.000509288	11341	5.419707236	5.416743661	0.004293085	4.857714417	4.897324629	0.084089537	0.896258134	0.902815584	0.002674153	0.152720219	0.762807513	0.275956153	1.221311082	5.447729052	5.430961453	0.041933148	-0.437025850207474	FAUX	-0.14194224362756	FAUX	-0.219754113136494	FAUX	-0.175002221227913	FAUX	0.0272442946113893	FAUX	-0.604602002958484	FAUX	-0.184938750290432	FAUX	-0.519916390544822	FAUX	-0.353961876346513	FAUX	-0.216228370930107	FAUX
10Q4A7	lo.sham	1	32724	5.412757612	5.408178888	0.004436198	4.833255604	4.830999034	0.018361482	0.892902992	0.891574476	0.000446022	12457	5.422232828	5.420503638	0.004283275	4.862992982	4.894282825	0.076536895	0.896823645	0.901618133	0.002428279	0.139198844	0.753231115	0.273912535	1.15786879	5.454174834	5.436971622	0.039297894	-0.284908769132657	FAUX	-0.475146931771366	FAUX	-0.643326306160045	FAUX	-0.625857645658764	FAUX	-0.64056743318584	FAUX	-0.0582369984081379	FAUX	0.225641836304497	FAUX	-0.279070308432332	FAUX	-0.495733880276424	FAUX	-0.652465433184187	FAUX
10Q4A8	lo.sham	1	32268	5.413649791	5.408990849	0.004413947	4.833813256	4.833284202	0.021826729	0.892860389	0.891835649	0.000568256	12773	5.424619985	5.423042609	0.00420769	4.853736102	4.896906334	0.096722041	0.894701129	0.901386399	0.00308417	0.140765678	0.758083457	0.273301678	1.310337439	5.449938043	5.439743106	0.040702589	-0.85584538832236	FAUX	-0.539629616409279	FAUX	0.486590599468083	FAUX	0.532970872849595	FAUX	0.964361214782922	FAUX	0.310702732331906	FAUX	0.414973871137227	FAUX	-0.701435720355017	FAUX	-0.373457715126364	FAUX	0.513419139685767	FAUX
10Q4A9	lo.sham	1	32813	5.413533834	5.408885837	0.004460051	4.834848759	4.835671551	0.021071203	0.893069187	0.891964994	0.000539551	12282	5.424048154	5.423285204	0.004139293	4.856585978	4.905272253	0.102186368	0.89531995	0.902741904	0.003273569	0.151441133	0.769500081	0.266502511	1.324142485	5.443193835	5.435534614	0.040769121	-0.689388424217691	FAUX	-0.162444561820476	FAUX	0.812872149312588	FAUX	0.844043406641518	FAUX	1.10967708107571	FAUX	0.3459543889986	FAUX	0.127473617144336	FAUX	-0.571403889903655	FAUX	0.0164599460199521	FAUX	0.82903610626192	FAUX
10Q4B10	lo.EMS	1	32427	5.413813318	5.409808901	0.004513077	4.81719672	4.817532317	0.020820545	0.889764349	0.88874134	0.000531215	13203	5.429343709	5.429510848	0.004321579	4.888070575	4.923500473	0.081093704	0.90024872	0.905221556	0.002556083	0.151859426	0.747027191	0.297910895	1.290502105	5.454046171	5.447289851	0.038430867	0.6364038339154	FAUX	0.527547489098709	FAUX	-0.423155728721268	FAUX	-0.38879534346688	FAUX	0.755568810656427	FAUX	1.25060726649998	FAUX	0.930524596746196	FAUX	0.865149763284604	FAUX	0.866038445316981	FAUX	-0.389266280965275	FAUX
10Q4B3	hi.sham	1	32482	5.41535345	5.41171901	0.004532416	4.825634339	4.825497521	0.020094598	0.891063131	0.890008061	0.000495058	12560	5.426657573	5.426463275	0.00424804	4.864181735	4.892681617	0.072957132	0.89630777	0.900320747	0.002296303	0.148964968	0.75660828	0.286140038	1.185818494	5.45245699	5.441927535	0.040638258	-0.423674238238433	FAUX	-0.836159697665082	FAUX	-0.870684073742125	FAUX	-0.877302514473654	FAUX	-0.346360847464423	FAUX	0.807762207603973	FAUX	0.564201644964371	FAUX	-0.224830850805207	FAUX	-0.57036277381088	FAUX	-0.859230866351263	FAUX
10Q4B6	hi.EMS	1	34669	5.411697081	5.405947091	0.004448364	4.815803776	4.815571108	0.022590726	0.889847246	0.888696134	0.000581514	13674	5.422142811	5.419623708	0.004243342	4.852129313	4.878556262	0.070640475	0.894834417	0.898794283	0.002225199	0.147652479	0.760713763	0.284681764	1.161535395	5.45117382	5.433828216	0.041018385	-0.819992183871339	FAUX	-1.26091608526072	FAUX	-0.993176395877636	FAUX	-1.01577173091745	FAUX	-0.601971699283289	FAUX	-0.186100269501024	FAUX	0.0109022042931673	FAUX	-0.774748985500288	FAUX	-1.22871547653982	FAUX	-0.993039888933076	FAUX
10Q4B7	lo.sham	1	31298	5.413279906	5.409050118	0.004411311	4.821773045	4.820949824	0.020008372	0.890691387	0.889506341	0.000496025	13378	5.42213053	5.420057292	0.004275549	4.865607667	4.888996188	0.06641776	0.89731489	0.900525633	0.002070465	0.140379728	0.759455823	0.307966373	1.213806579	5.454840651	5.436714311	0.037110743	-0.152768535799279	FAUX	-0.779147781741138	FAUX	-1.25973983778409	FAUX	-1.32496370458126	FAUX	-0.0517502523493256	FAUX	-0.123095861725858	FAUX	0.208063811241122	FAUX	-0.159769582153805	FAUX	-0.742132767759036	FAUX	-1.23694192829046	FAUX
10Q4B8	lo.sham	1	32004	5.413239292	5.408300186	0.004384039	4.819700079	4.820775977	0.021037105	0.890317448	0.889153836	0.000536572	12848	5.423613285	5.423045069	0.0042059	4.835563284	4.866012494	0.074099695	0.891524128	0.895973597	0.002324757	0.124688667	0.751556663	0.29855956	1.253169169	5.460704784	5.442509557	0.035661579	-1.71042844451711	FAUX	-2.04580481889714	FAUX	-0.821665783153075	FAUX	-0.822492272322873	FAUX	0.362591638679357	FAUX	0.311060196728839	FAUX	0.603962080015599	FAUX	-1.53061031917949	FAUX	-1.81335377874214	FAUX	-0.793236962951604	FAUX
10Q4B9	lo.sham	1	32736	5.415398522	5.411225632	0.004445324	4.823014783	4.824990956	0.020993377	0.890574301	0.889777646	0.000532083	13054	5.421941055	5.420086182	0.004247149	4.844694894	4.888662399	0.094583465	0.893477716	0.900130651	0.003016685	0.145855676	0.760609775	0.273246822	1.289478147	5.447025441	5.434611214	0.039444675	-1.18493185084735	FAUX	-0.88905612382146	FAUX	0.370332803010571	FAUX	0.419833606126824	FAUX	0.744790335610604	FAUX	-0.11889783472154	FAUX	0.064392177394205	FAUX	-1.11396062520405	FAUX	-0.757689961917423	FAUX	0.389895992203459	FAUX
10Q4C1	hi.sham	1	35175	5.414765174	5.4110647	0.0045279	4.850458322	4.850376632	0.022370628	0.895743284	0.89480213	0.000569904	12475	5.423016538	5.42277609	0.004264954	4.854939971	4.898832097	0.101141175	0.895172012	0.90162131	0.003216091	0.163527054	0.770661323	0.289982542	1.412143055	5.43874806	5.432610168	0.041120953	-0.7291823393494	FAUX	-0.474262894517047	FAUX	0.713853617419799	FAUX	0.750614326379616	FAUX	2.03599627362382	FAUX	0.27197466174853	FAUX	-0.0723079121512901	FAUX	-0.646506562141227	FAUX	-0.283702004500655	FAUX	0.76866624842826	FAUX
10Q4C10	lo.EMS	1	34602	5.414982225	5.410726633	0.004445038	4.832272598	4.831268125	0.019918778	0.892350201	0.891179649	0.000490952	11785	5.430608739	5.432076548	0.004231404	4.878661361	4.911884373	0.080890214	0.898299476	0.903422646	0.002531989	0.124989393	0.74221468	0.307531027	1.344604872	5.462945072	5.453957078	0.037328536	0.112075734934861	FAUX	0.0269798286693331	FAUX	-0.464662957703224	FAUX	-0.433025720175525	FAUX	1.32507002459241	FAUX	1.62343100775568	FAUX	1.38599165143665	FAUX	0.435833779175586	FAUX	0.324636772214303	FAUX	-0.401019767996447	FAUX
10Q4C12	lo.EMS	1	37181	5.413155853	5.409058585	0.004439596	4.852272269	4.850658486	0.019377461	0.896345663	0.895115125	0.000470358	11790	5.426487262	5.425830822	0.004266943	4.866224515	4.913156617	0.10904877	0.896693932	0.904237255	0.00350643	0.142578456	0.769974555	0.259303465	1.310871943	5.445554967	5.439877194	0.037658887	-0.319800332581385	FAUX	0.253654271134326	FAUX	1.21402657979185	FAUX	1.21441114309002	FAUX	0.969987556904271	FAUX	0.715860000164207	FAUX	0.424134001192713	FAUX	-0.131624541966002	FAUX	0.383933354560774	FAUX	1.22540522960797	FAUX
10Q4C3	hi.sham	1	33709	5.414230371	5.409720149	0.004467779	4.828725923	4.828334376	0.021028497	0.891821686	0.89075944	0.000532349	13133	5.423348518	5.422049507	0.004287601	4.833521261	4.880596391	0.101024977	0.891183239	0.89849713	0.003230712	0.146272748	0.749790604	0.26796046	1.300702372	5.452267963	5.43951427	0.043475484	-1.80212434371363	FAUX	-1.34360236862096	FAUX	0.739041514611846	FAUX	0.774459050151051	FAUX	0.86293974122216	FAUX	0.166394355246251	FAUX	0.399341096232902	FAUX	-1.62378208823675	FAUX	-1.13362941030887	FAUX	0.761954706406303	FAUX
10Q4C5	hi.EMS	1	31171	5.413664784	5.409117845	0.004457015	4.820742603	4.820812065	0.022796964	0.890433468	0.889642011	0.000583287	13389	5.427575419	5.427146785	0.004176439	4.875988939	4.897294371	0.063429656	0.898341959	0.900518347	0.00199186	0.121517664	0.744417059	0.287058393	1.118699267	5.465231426	5.448106239	0.037130271	0.123503257927868	FAUX	-0.781175196105329	FAUX	-1.39515428678079	FAUX	-1.48646287911696	FAUX	-1.05287704570147	FAUX	0.907083545011154	FAUX	0.98629558487137	FAUX	0.313898675894436	FAUX	-0.355372137262365	FAUX	-1.40953341490795	FAUX
10Q4C6	hi.EMS	1	30790	5.416702441	5.414123973	0.004432704	4.826615264	4.827013678	0.021044931	0.891020038	0.889891423	0.00052666	13023	5.425231708	5.42357352	0.004284097	4.843609243	4.867308355	0.064937162	0.892749253	0.895834454	0.002022027	0.117714812	0.739307379	0.306524121	1.193387996	5.467495905	5.448358436	0.036228125	-1.38088147027299	FAUX	-2.08452297932493	FAUX	-1.34318497588602	FAUX	-1.42411240534398	FAUX	-0.266682102421848	FAUX	0.387849797574726	FAUX	1.00352425052079	FAUX	-1.16349582840632	FAUX	-1.75295645834127	FAUX	-1.32246057486463	FAUX
10Q4C7	lo.sham	1	32610	5.416638887	5.412994477	0.004454786	4.82446012	4.825419626	0.021314056	0.890631298	0.88973329	0.0005322	13660	5.428282591	5.428567253	0.004143557	4.840516106	4.871736349	0.076458807	0.89167917	0.89620705	0.002424687	0.1261347	0.736603221	0.277129713	1.19044731	5.465042083	5.45017903	0.039281436	-1.6687236209434	FAUX	-1.98084380248708	FAUX	-0.649514318383138	FAUX	-0.632609450372699	FAUX	-0.297636605114929	FAUX	1.11349278774954	FAUX	1.1278968850459	FAUX	-1.30462697444457	FAUX	-1.54657709176481	FAUX	-0.656975759467002	FAUX
10Q4C8	lo.sham	1	31666	5.414393941	5.410412779	0.004532785	4.825444299	4.825150132	0.02149075	0.891187415	0.890082048	0.000544056	13016	5.42458211	5.423113107	0.004198327	4.844679571	4.875582104	0.078481332	0.893054756	0.897722064	0.002488154	0.138060848	0.744161033	0.275204934	1.189874799	5.45521479	5.44289505	0.039322799	-1.29870406856091	FAUX	-1.55927351075612	FAUX	-0.540178413103907	FAUX	-0.514038632525409	FAUX	-0.303663019798888	FAUX	0.320946848210941	FAUX	0.630296770781878	FAUX	-1.11465977061877	FAUX	-1.36733464452836	FAUX	-0.540155663355545	FAUX
10Q4C9	lo.sham	1	31053	5.415477104	5.411862035	0.004488623	4.827249371	4.827369273	0.022531439	0.891347088	0.89034967	0.000589845	12915	5.425894565	5.424598273	0.004277812	4.834655212	4.873279903	0.094893815	0.890979328	0.897274143	0.003031123	0.137359659	0.747502904	0.268558374	1.26487268	5.456137662	5.443145595	0.040384847	-1.85697446355044	FAUX	-1.68391274619713	FAUX	0.395205442341587	FAUX	0.444144195532192	FAUX	0.485786145936503	FAUX	0.53675740459152	FAUX	0.647412581180633	FAUX	-1.57204309181296	FAUX	-1.47463532833951	FAUX	0.40782166275299	FAUX
10Q4D2	hi.sham	1	32010	5.413963854	5.409611085	0.004432126	4.844554982	4.844632475	0.020171517	0.894789694	0.893690834	0.000503935	14034	5.422731121	5.420816054	0.004226694	4.850520957	4.868894129	0.057868519	0.894425975	0.896424107	0.001768324	0.132107738	0.765854354	0.342009895	1.265492073	5.453163523	5.436775475	0.035100015	-0.929859197648895	FAUX	-1.92044516405058	FAUX	-1.78024434811185	FAUX	-1.96401653558922	FAUX	0.492306053973803	FAUX	-0.0128396012267104	FAUX	0.212242188088503	FAUX	-0.848133748450486	FAUX	-1.67904691066494	FAUX	-1.73074208171255	FAUX
10Q4D3	hi.sham	1	32082	5.413974593	5.40958149	0.004489182	4.836737498	4.837462171	0.021689571	0.893341061	0.892284412	0.000551178	13601	5.422496315	5.421763468	0.00421556	4.857170041	4.88286592	0.072994742	0.895713336	0.899205335	0.002317832	0.152562312	0.761267554	0.266932953	1.110760317	5.448845052	5.435022122	0.039763817	-0.583571331259812	FAUX	-1.14653607850395	FAUX	-0.83359562297627	FAUX	-0.835800705200814	FAUX	-1.1364447061573	FAUX	0.124829819203499	FAUX	0.0924630765114512	FAUX	-0.544754737102309	FAUX	-1.02785149881058	FAUX	-0.857058530377788	FAUX
10Q4D4	hi.EMS	1	31723	5.414347587	5.410185684	0.004451254	4.836467124	4.834557393	0.021028234	0.893228578	0.892122138	0.00052678	13744	5.420021188	5.417787127	0.004290586	4.851167937	4.876084991	0.070817276	0.895015064	0.898629368	0.002247786	0.160506403	0.770590803	0.272321923	1.106353441	5.443279702	5.428347028	0.038251079	-0.771399858797347	FAUX	-1.30680560486964	FAUX	-0.954265306767674	FAUX	-0.971548715299082	FAUX	-1.18283274453	FAUX	-0.452975196241726	FAUX	-0.363541406905995	FAUX	-0.81861386980825	FAUX	-1.34389615285031	FAUX	-0.98282794603368	FAUX
10Q4D6	hi.EMS	1	34634	5.413738647	5.409658434	0.004450813	4.836880972	4.837209528	0.019718779	0.893411956	0.892151092	0.000492766	11843	5.432152776	5.432915602	0.004184872	4.877252743	4.906577446	0.076425585	0.897789064	0.902313522	0.002379404	0.11736891	0.717554674	0.308662404	1.319052374	5.474167775	5.460663351	0.039475597	-0.0252202391232196	FAUX	-0.281646842929611	FAUX	-0.727524273143241	FAUX	-0.71815975119525	FAUX	1.05609711549708	FAUX	1.74535455742834	FAUX	1.84412610692464	FAUX	0.371562499671932	FAUX	0.0772922110591741	FAUX	-0.658894646616983	FAUX
10Q4D8	lo.sham	1	30435	5.413695911	5.409625459	0.004457645	4.83802747	4.836507671	0.020775971	0.893628233	0.892488525	0.000523452	13145	5.422560489	5.421674658	0.004249386	4.858628944	4.884931237	0.07391191	0.895960013	0.899718833	0.002336809	0.149106124	0.758843667	0.285634409	1.191254678	5.45056044	5.435511513	0.038857995	-0.517217564121249	FAUX	-1.00364927900027	FAUX	-0.800903555059337	FAUX	-0.799377974424828	FAUX	-0.289138018414306	FAUX	0.111924773227349	FAUX	0.125895488121518	FAUX	-0.478189094407311	FAUX	-0.931591473562239	FAUX	-0.804083336543174	FAUX
10Q4D9	lo.sham	1	31321	5.41465444	5.410186529	0.004467932	4.839871928	4.837512683	0.01879958	0.893807495	0.892355409	0.000449204	12790	5.425945331	5.425410305	0.004229904	4.865183024	4.893861588	0.076969548	0.896615246	0.901553657	0.002444663	0.14691165	0.740969507	0.269587419	1.149989367	5.455919359	5.44463101	0.040930482	-0.340966118289285	FAUX	-0.493088129760071	FAUX	-0.615101252634671	FAUX	-0.595124142161197	FAUX	-0.723508495398334	FAUX	0.654754367704581	FAUX	0.748887691454084	FAUX	-0.179144848508662	FAUX	-0.515366839408398	FAUX	-0.627475598673904	FAUX
10Q4E11	lo.EMS	1	33316	5.415073291	5.411210468	0.004403893	4.852965376	4.85221763	0.02086737	0.896155248	0.894922332	0.000520037	13144	5.431499779	5.432882743	0.004057791	4.884855422	4.92112439	0.083937184	0.899305268	0.905862106	0.002664663	0.104610469	0.716905052	0.279565201	1.271497384	5.475592287	5.459953089	0.03991173	0.382624218003076	FAUX	0.705787987449388	FAUX	-0.236102731175788	FAUX	-0.192009351812712	FAUX	0.555519676755111	FAUX	1.74057979213482	FAUX	1.7956050439402	FAUX	0.718451370171635	FAUX	0.755294278890149	FAUX	-0.225028208807449	FAUX
10Q4E12	lo.EMS	1	33235	5.413859857	5.410005781	0.004445325	4.854162152	4.853783359	0.023345575	0.896577898	0.895515365	0.000605641	14237	5.425076654	5.42496816	0.004162758	4.855115942	4.894271745	0.090852373	0.894885836	0.900281069	0.002892646	0.14392077	0.778815762	0.272915288	1.274986029	5.444105469	5.436221503	0.03987877	-0.806160961858339	FAUX	-0.847200563317329	FAUX	0.156648268450397	FAUX	0.208533283867601	FAUX	0.592242152751425	FAUX	0.590505954765627	FAUX	0.174397969611886	FAUX	-0.638477500092086	FAUX	-0.496250295470686	FAUX	0.174389866919128	FAUX
10Q4E3	hi.sham	1	32910	5.413566088	5.409627151	0.004437041	4.849265487	4.848287669	0.021722259	0.895721901	0.894635996	0.000551092	13372	5.421153099	5.419036648	0.00418991	4.847140575	4.882353746	0.083132252	0.894073895	0.899684269	0.00265131	0.149042776	0.759497457	0.26717109	1.190068354	5.448356216	5.434011308	0.038842954	-1.02456536942065	FAUX	-1.01326711458687	FAUX	-0.25910621870779	FAUX	-0.215990774692351	FAUX	-0.301625604458127	FAUX	-0.271406386951036	FAUX	0.0234100091087413	FAUX	-1.00237107634994	FAUX	-1.05172283777289	FAUX	-0.271520703883251	FAUX
10Q4E5	hi.EMS	1	33586	5.414308075	5.41026421	0.004512295	4.845328544	4.842802632	0.021067596	0.894868947	0.893644925	0.000520926	12935	5.428317537	5.427874624	0.004231246	4.94383333	4.960832142	0.053306014	0.91070778	0.912199284	0.001621947	0.11751063	0.732276768	0.336465394	1.194247561	5.469900824	5.452133119	0.03853519	3.44979150981616	VRAI	2.46918157867107	FAUX	-2.03241101436452	FAUX	-2.29328037829629	FAUX	-0.257634075156313	FAUX	1.01284636179095	FAUX	1.26138913923687	FAUX	3.40944751647137	VRAI	2.60598800294101	VRAI	-1.99427023222194	FAUX
10Q4E6	hi.EMS	1	31388	5.414720984	5.410903708	0.004474491	4.844905098	4.844203714	0.019642393	0.894732273	0.893415426	0.000488812	13265	5.412488247	5.406541884	0.004664179	4.888677106	4.90176881	0.056480812	0.903198298	0.9055306	0.001757856	0.253675085	0.798190727	0.302225271	1.051704265	5.41003414	5.396391162	0.0380433	1.42981226586893	FAUX	0.613542581710195	FAUX	-1.79827778685109	FAUX	-1.98709989919268	FAUX	-1.75808561602549	FAUX	-2.08702967127322	FAUX	-2.54658454719539	FAUX	0.892824067765036	FAUX	-0.14682806818617	FAUX	-1.81089538766157	FAUX
10Q4E8	lo.sham	1	31587	5.415919685	5.412567218	0.004458465	4.846685419	4.845922416	0.021743877	0.894853753	0.893716887	0.000546326	13057	5.42221496	5.419736069	0.004179659	4.864506835	4.885084043	0.062466801	0.897104659	0.89971399	0.001949067	0.130274948	0.748563989	0.303361469	1.172774811	5.458788316	5.43907994	0.038033078	-0.20931867553384	FAUX	-1.00499690015946	FAUX	-1.4688746673662	FAUX	-1.57572497478777	FAUX	-0.483662388856865	FAUX	-0.169773010510767	FAUX	0.369670139197284	FAUX	-0.209997451710021	FAUX	-0.924469511452741	FAUX	-1.46514746845062	FAUX
10Q4E9	lo.sham	1	30990	5.416826922	5.413182371	0.004477068	4.850429628	4.849910558	0.019553871	0.895401438	0.894075242	0.000481905	12357	5.425885795	5.424670969	0.004205511	4.859668795	4.89936628	0.094590463	0.895594531	0.901731069	0.003025133	0.140729951	0.746459497	0.263398176	1.24918578	5.458842876	5.443125243	0.038959221	-0.615528746442012	FAUX	-0.443721174341462	FAUX	0.384886346234593	FAUX	0.43406532417149	FAUX	0.320661345704152	FAUX	0.547320913456302	FAUX	0.646022248213563	FAUX	-0.430743616454356	FAUX	-0.258804872938163	FAUX	0.390300193403735	FAUX
10Q4F10	lo.EMS	1	33578	5.414991162	5.409801294	0.0044345	4.857798569	4.856460016	0.020228153	0.897066259	0.895833878	0.000505377	12603	5.422479015	5.421667257	0.004339064	4.867574814	4.899924414	0.08050153	0.897612392	0.902866559	0.002540818	0.141553598	0.750614933	0.292754335	1.260977659	5.455863396	5.43907678	0.040302312	-0.0727433269988858	FAUX	-0.127757856142683	FAUX	-0.449453057948858	FAUX	-0.416793622379763	FAUX	0.444786039827212	FAUX	0.110849328510954	FAUX	0.369454265957484	FAUX	-0.0700141944888902	FAUX	-0.232791436292848	FAUX	-0.423469973673502	FAUX
10Q4F2	hi.sham	1	31770	5.414100054	5.409305732	0.0044497	4.854669461	4.85417543	0.023233371	0.896630049	0.895298654	0.000599485	13470	5.422638743	5.420990711	0.004206047	4.852391947	4.889503392	0.085206889	0.89480217	0.900394953	0.00273017	0.14610245	0.742242019	0.25690723	1.156316217	5.454518975	5.439298739	0.042852875	-0.828666320207194	FAUX	-0.815511013845513	FAUX	-0.123252475970301	FAUX	-0.0752225268566723	FAUX	-0.656910261053113	FAUX	0.0125399350309739	FAUX	0.384617243308049	FAUX	-0.762765734383819	FAUX	-0.71849306990827	FAUX	-0.151690643074913	FAUX
10Q4F5	hi.EMS	1	32792	5.414697443	5.410379862	0.004460204	4.854651993	4.85387457	0.018465463	0.896538133	0.895394749	0.00045301	13241	5.422599605	5.419694763	0.004241049	4.843625	4.872727184	0.07687	0.893177353	0.897637886	0.002420663	0.133147043	0.755456537	0.294375488	1.253266468	5.45501302	5.438806484	0.037784685	-1.26572664144007	FAUX	-1.58269701972521	FAUX	-0.656446545884731	FAUX	-0.640179218415941	FAUX	0.363615835808033	FAUX	-0.175775215544983	FAUX	0.350989179495806	FAUX	-1.16277688079161	FAUX	-1.50039638337137	FAUX	-0.633225444499149	FAUX
10Q4F6	hi.EMS	1	43630	5.41411201	5.40967957	0.004453778	4.8522817	4.852376287	0.020998987	0.896189773	0.895227096	0.000528425	8596	5.444494127	5.448237771	0.003906902	4.795123251	4.930210153	0.226423142	0.880567241	0.904890401	0.007318392	0.112261517	0.553513262	0.275528665	2.097543181	5.535680237	5.522827492	0.067100834	-4.65772684915745	VRAI	0.4353997531978	FAUX	7.78097186096206	VRAI	6.09075108356306	VRAI	9.25071421566316	VRAI	3.9718301277329	VRAI	6.09082690301733	VRAI	-3.37577534197471	VRAI	1.17876233526144	FAUX	8.00489394695978	VRAI
10Q4F9	lo.sham	1	33936	5.413353058	5.408143256	0.004466635	4.853221031	4.850866695	0.019011523	0.896490205	0.895265389	0.000460695	12732	5.424180376	5.422520076	0.004280093	4.847255198	4.884370487	0.088687693	0.893582212	0.899203178	0.0028185	0.143732328	0.756833176	0.280560638	1.277120376	5.449800113	5.438920313	0.040934469	-1.15682342058872	FAUX	-1.14713628887774	FAUX	0.0289154303954401	FAUX	0.0800571719022677	FAUX	0.614708900292465	FAUX	0.234773080389055	FAUX	0.358765329815626	FAUX	-0.997141151082375	FAUX	-0.9577268363942	FAUX	0.0493589646308744	FAUX
10Q4G10	lo.EMS	1	30339	5.41460742	5.410488732	0.004513073	4.860911074	4.861041293	0.020938872	0.897700147	0.89634787	0.000520658	13506	5.421937904	5.419126826	0.00438125	4.914135233	4.94384804	0.080207805	0.906309359	0.911179336	0.002554127	0.16244632	0.75699689	0.264429833	1.131409283	5.44740917	5.433292087	0.03900268	2.26665808914326	FAUX	2.18536916775576	FAUX	-0.426525370121148	FAUX	-0.392378259444507	FAUX	-0.919087778672931	FAUX	-0.258302555895498	FAUX	-0.0257230818361748	FAUX	2.0544068361638	FAUX	1.81439519305239	FAUX	-0.440435392014604	FAUX
10Q4G11	lo.EMS	1	34310	5.414021271	5.409454629	0.004499715	4.859008267	4.857103225	0.019739978	0.897444943	0.896063908	0.000477922	13460	5.421739578	5.420611647	0.004266158	4.871164604	4.904117496	0.08893351	0.898402998	0.903181743	0.002835998	0.149182764	0.763150074	0.26841556	1.225524288	5.448862385	5.43413599	0.037542518	0.139922168456086	FAUX	-0.0400542370151237	FAUX	0.0590595946158386	FAUX	0.110527634222698	FAUX	0.0715937071204083	FAUX	-0.0425421317169615	FAUX	0.0319275747042928	FAUX	0.0937778317732808	FAUX	-0.0373608175605199	FAUX	0.0635572393448234	FAUX
10Q4G12	lo.EMS	1	36859	5.412177676	5.407341608	0.00440315	4.854941835	4.855676612	0.024175559	0.897000114	0.89608693	0.000635511	14024	5.419797761	5.41744512	0.004212614	4.855398979	4.894149847	0.095751914	0.895809409	0.902080041	0.003064984	0.1576583	0.799486594	0.266784827	1.271917696	5.43140052	5.424817957	0.037917147	-0.557728607899721	FAUX	-0.346615650665797	FAUX	0.453538482955765	FAUX	0.500932944717838	FAUX	0.559944001193673	FAUX	-0.502672483249466	FAUX	-0.604627479746084	FAUX	-0.625563317441521	FAUX	-0.501931701549123	FAUX	0.457385058831231	FAUX
10Q4G2	hi.sham	1	33174	5.415001084	5.410755307	0.004548714	4.860303359	4.859135294	0.02267872	0.897524678	0.896034302	0.000581317	13649	5.42291354	5.420196773	0.004238796	4.848972708	4.88931291	0.094430035	0.894127101	0.90014565	0.003039655	0.146384351	0.756319144	0.242866056	1.146306257	5.45212984	5.436258086	0.039210445	-1.01025346140176	FAUX	-0.88488247736956	FAUX	0.409903694091983	FAUX	0.458483098215853	FAUX	-0.762277965655923	FAUX	-0.10282777572439	FAUX	0.176897112248207	FAUX	-0.918775997960454	FAUX	-0.727371030109702	FAUX	0.381033947310871	FAUX
10Q4G9	lo.sham	1	29479	5.413940351	5.409290501	0.004481085	4.859724851	4.856009504	0.019518036	0.897591159	0.896148687	0.00047135	14255	5.425221151	5.424983667	0.004307342	4.899457034	4.924467956	0.071457695	0.903044513	0.90621555	0.002245436	0.149210803	0.750403367	0.296337694	1.206998518	5.453101329	5.441305431	0.039265648	1.38844556334133	FAUX	0.80413789721298	FAUX	-0.958313700065076	FAUX	-0.976139385332898	FAUX	-0.123413851441221	FAUX	0.592759288263638	FAUX	0.521703035483854	FAUX	1.38468187841149	FAUX	0.911130766741427	FAUX	-0.94583764473624	FAUX
10Q4H1	hi.sham	1	34319	5.414171059	5.409458012	0.004486075	4.862360805	4.861618036	0.022521055	0.898040526	0.896812294	0.000576153	13903	5.423203009	5.421723177	0.004206254	4.836592953	4.884747232	0.106377425	0.891757459	0.898914989	0.003390314	0.159821621	0.777098468	0.282510004	1.420727691	5.436332042	5.4317882	0.042303613	-1.64766462446009	FAUX	-1.22732823482918	FAUX	1.01399116016585	FAUX	1.03131780492606	FAUX	2.12636060976209	FAUX	0.118975104560687	FAUX	-0.128460094161883	FAUX	-1.48362941726338	FAUX	-0.940167554592832	FAUX	1.07110959437633	FAUX
10Q4H10	lo.EMS	1	30715	5.415207558	5.410910453	0.00445495	4.858108419	4.857531502	0.024328028	0.897082792	0.896081755	0.000637206	14589	5.443976488	5.448809858	0.003937239	4.914928177	4.959890062	0.092224143	0.90275264	0.909045927	0.002910717	0.103708273	0.660223456	0.289963679	1.403363038	5.492526124	5.487869129	0.046318417	1.30993450200999	FAUX	1.591723264476	FAUX	0.18777955154714	FAUX	0.23959532447256	FAUX	1.94357530114604	FAUX	4.05496050761509	VRAI	3.70267023272411	VRAI	2.09058664179937	FAUX	2.56207966122594	FAUX	0.253622659217277	FAUX
10Q4H2	hi.sham	1	34642	5.414922565	5.410091941	0.004455241	4.863205539	4.862870482	0.021378208	0.89807152	0.896968555	0.000539044	13213	5.422605244	5.422174386	0.004241025	4.832264102	4.895240169	0.133251817	0.89108519	0.901686422	0.004348018	0.161129191	0.761144328	0.218187873	1.223014882	5.44169675	5.434867379	0.042325131	-1.82849859228227	FAUX	-0.456144722120487	FAUX	2.66384752378066	VRAI	2.45965609309638	FAUX	0.0451789811738001	FAUX	0.184540613960984	FAUX	0.0818919142510176	FAUX	-1.68114271934434	FAUX	-0.451114116041038	FAUX	2.62336188118465	VRAI
10Q4H3	hi.sham	1	28663	5.415220786	5.410941644	0.004422098	4.863760396	4.862301363	0.022117892	0.898129207	0.89655385	0.000571833	15342	5.422871442	5.42145091	0.004311185	4.866189637	4.91350656	0.110778172	0.89727817	0.904865462	0.003557028	0.16581932	0.760070395	0.267430267	1.35562427	5.441266935	5.43393616	0.043277987	-0.162645866597558	FAUX	0.428460185969062	FAUX	1.30119279428629	FAUX	1.2932453298535	FAUX	1.44106336256427	FAUX	0.0794117878984398	FAUX	0.0182763248610458	FAUX	-0.133215927058721	FAUX	0.400243452243341	FAUX	1.32529467861618	FAUX
10Q4H5	hi.EMS	1	33523	5.41364485	5.408689295	0.004520613	4.861608716	4.861546358	0.022311882	0.897993041	0.896776552	0.000576705	13288	5.422230098	5.421708375	0.004350363	4.849231496	4.90146377	0.110250737	0.89429018	0.902611755	0.00358499	0.159316677	0.764072848	0.223051739	1.122880675	5.44180446	5.434873761	0.042767148	-0.9663867612587	FAUX	-0.19866003699	FAUX	1.34936350636371	FAUX	1.33657104423432	FAUX	-1.00886234804355	FAUX	0.11682421512777	FAUX	0.0823278962182206	FAUX	-0.906968229012314	FAUX	-0.16104533270379	FAUX	1.29483028020699	FAUX
10Q4H8	lo.sham	1	33870	5.41563954	5.410993905	0.004438528	4.86225587	4.86145077	0.021059834	0.89778181	0.896428147	0.000534894	13365	5.4264687	5.425968461	0.004217577	4.85724046	4.905150703	0.112195456	0.895060682	0.903276498	0.003632066	0.141488964	0.738870183	0.228692884	1.179529418	5.457916427	5.445540378	0.042494382	-0.75912905061771	FAUX	-0.0136875545996683	FAUX	1.4304622990737	FAUX	1.40913299761206	FAUX	-0.412561461871735	FAUX	0.735860423800137	FAUX	0.811010544716686	FAUX	-0.541541716090672	FAUX	0.0107947594801249	FAUX	1.40715633822347	FAUX
1Q1A1	hi.sham	1	19202	5.420763467	5.418962175	0.004604355	4.881065568	4.878846246	0.020595716	0.900392713	0.898399563	0.000492766	9546	5.424792599	5.424341698	0.004453018	4.834647014	4.862280481	0.07133005	0.891139316	0.895156988	0.002186123	0.138068301	0.696207836	0.344618935	1.379266465	5.478703832	5.455516354	0.046252125	-0.652084706842252	FAUX	-0.478926073466445	FAUX	0.0278692072344421	FAUX	0.0783170341148531	FAUX	1.09785621959946	FAUX	-0.266701697768185	FAUX	-0.108620954545831	FAUX	-0.628516335956582	FAUX	-0.511313439135104	FAUX	0.062740076803582	FAUX
1Q1A10	lo.EMS	1	17975	5.419417728	5.416593914	0.004661123	4.889928692	4.886332771	0.017990263	0.902252525	0.900087645	0.000403178	6424	5.432561441	5.433413774	0.004558867	4.826990601	4.875174165	0.105828342	0.888459514	0.896031495	0.00337099	0.166251557	0.663449564	0.278157916	1.340182506	5.477792109	5.470490608	0.053878249	-1.33376447869379	FAUX	-0.247188444702404	FAUX	2.67473876621346	VRAI	2.50700601880761	FAUX	0.534516925000476	FAUX	1.58864295362068	FAUX	0.769283862613728	FAUX	-0.953975681778377	FAUX	0.0441996484061793	FAUX	2.64837600108511	VRAI
1Q1A11	lo.EMS	1	17094	5.417810904	5.414456899	0.004648095	4.889677592	4.886073151	0.018050967	0.902482608	0.900478023	0.000420619	8136	5.424333091	5.422742456	0.004372892	4.82353963	4.861169857	0.08865407	0.889181375	0.895286562	0.00280712	0.169985251	0.703539823	0.286487207	1.289942101	5.464119829	5.44762697	0.050625547	-1.15013970276312	FAUX	-0.44458996007973	FAUX	1.41511187288155	FAUX	1.41601643930036	FAUX	-0.189626560900418	FAUX	-0.593765215641801	FAUX	-0.571156732155968	FAUX	-1.1006698013498	FAUX	-0.559163701894558	FAUX	1.36116982123765	FAUX
1Q1A12	lo.EMS	1	17945	5.422442237	5.420776499	0.004690227	4.893304407	4.892320043	0.018363666	0.902375819	0.900611181	0.000422198	7914	5.430837174	5.431699006	0.004407833	4.801107503	4.825841388	0.061780367	0.883973569	0.887252227	0.001859999	0.13570887	0.661612333	0.364557762	1.364831491	5.493253436	5.472645302	0.050089497	-2.47488533916729	FAUX	-2.5736269393102	FAUX	-0.700657866312608	FAUX	-0.701212579677416	FAUX	0.889796742546108	FAUX	1.23795303025878	FAUX	0.895608435584408	FAUX	-2.05421624389568	FAUX	-2.08125986093623	FAUX	-0.653005602150629	FAUX
1Q1A3	hi.sham	1	18661	5.419545592	5.416305089	0.00460783	4.883574959	4.883962214	0.020872137	0.901061068	0.899171702	0.000507457	11114	5.425348738	5.426080006	0.004322609	4.857328659	4.880127322	0.065185581	0.8952471	0.898545503	0.002007211	0.160968148	0.700737808	0.327662761	1.272418269	5.470672684	5.451917624	0.049569314	0.392840724191627	FAUX	0.419004338904607	FAUX	-0.371801579896986	FAUX	-0.341513898920698	FAUX	-0.442207502292542	FAUX	0.0888024283289611	FAUX	-0.319605915977417	FAUX	0.335636635397356	FAUX	0.257602081577864	FAUX	-0.397785904657593	FAUX
1Q1A6	hi.EMS	1	22277	5.420909997	5.418900933	0.004609908	4.886957118	4.884968028	0.017164508	0.901459112	0.89960382	0.000381499	8263	5.436559025	5.440008873	0.004267321	4.832179658	4.851420414	0.056113126	0.888765481	0.891372987	0.001678218	0.119811207	0.632215902	0.369139916	1.338583872	5.506150861	5.487228903	0.051657259	-1.25593353642489	FAUX	-1.48165723397257	FAUX	-1.1067377008432	FAUX	-1.16563747465224	FAUX	0.511474905386189	FAUX	2.93741711016771	VRAI	1.75061019857259	FAUX	-0.733398879475247	FAUX	-0.979209918533502	FAUX	-1.07776349802447	FAUX
1Q1A7	lo.sham	1	17649	5.417274936	5.41465252	0.004620981	4.882323456	4.877670756	0.020539483	0.901211974	0.899361106	0.000504385	10044	5.426423571	5.425093018	0.004395619	4.841316644	4.866092299	0.0694447	0.892102651	0.895794546	0.002127615	0.172242135	0.690362405	0.345465474	1.373137985	5.472497623	5.454217347	0.051248006	-0.407034519172932	FAUX	-0.309978107218563	FAUX	-0.102831575348535	FAUX	-0.0570192224106411	FAUX	1.00952295734822	FAUX	-0.113048052948464	FAUX	-0.184778638449419	FAUX	-0.345003231755743	FAUX	-0.347084597608861	FAUX	-0.0785663012004133	FAUX
1Q1A8	lo.sham	1	14127	5.423518897	5.421487112	0.004765703	4.896050237	4.897451139	0.020528779	0.90271106	0.900683735	0.000510127	6834	5.426064434	5.425361381	0.004728769	4.857138201	4.885231138	0.074587374	0.895081003	0.898439877	0.002302331	0.152326602	0.633011414	0.332503715	1.320550779	5.497747975	5.476951118	0.053197908	0.350589481351606	FAUX	0.391014261322812	FAUX	0.287465784495716	FAUX	0.341852965904839	FAUX	0.251553696021036	FAUX	-0.0581647101853891	FAUX	1.14804816368053	FAUX	0.327540633250307	FAUX	0.477495525872194	FAUX	0.306875466214292	FAUX
1Q1A9	lo.sham	1	15096	5.414315679	5.40961024	0.004689731	4.881592388	4.876177412	0.020348868	0.901566733	0.899708575	0.000488442	7678	5.418879584	5.415866908	0.004495997	4.813152639	4.849846127	0.091945853	0.888147684	0.893722262	0.002896126	0.224146913	0.727923939	0.299864497	1.356057567	5.437753108	5.425270042	0.058063113	-1.41308683282909	FAUX	-0.859117428328207	FAUX	1.61394201328253	FAUX	1.59507177047896	FAUX	0.763333193727393	FAUX	-1.9998944419807	FAUX	-1.88189012749499	FAUX	-1.54220075010049	FAUX	-1.04703669574053	FAUX	1.60788790164984	FAUX
1Q1B1	hi.sham	1	18042	5.421546573	5.419339373	0.004626496	4.901914618	4.899886134	0.019571257	0.904120424	0.902090964	0.000476981	9664	5.428705086	5.428810018	0.004413378	4.852521983	4.883155883	0.072923692	0.893796347	0.898239459	0.002249372	0.150248344	0.66959851	0.330496119	1.343430309	5.485470635	5.4652274	0.048670733	0.0238026482244722	FAUX	0.337905032829914	FAUX	0.169160890381887	FAUX	0.222598138386049	FAUX	0.581329353879965	FAUX	0.647121512343152	FAUX	0.460714523739606	FAUX	0.131314111711978	FAUX	0.388084980950692	FAUX	0.182183033737329	FAUX
1Q1B11	lo.EMS	1	17959	5.423166752	5.421594056	0.004607298	4.903034522	4.901820536	0.01843964	0.904048935	0.902276184	0.000425557	8244	5.429804231	5.431969745	0.004500934	4.878574786	4.904607364	0.066708306	0.898422935	0.902418245	0.002047439	0.139980592	0.663876759	0.331640421	1.276750652	5.490906752	5.470003056	0.04521617	1.20069984148396	FAUX	1.44525118186285	FAUX	-0.281936414761483	FAUX	-0.245535632540015	FAUX	-0.37976240600246	FAUX	1.29332229255034	FAUX	0.740699851055234	FAUX	1.23876850598312	FAUX	1.31230326043107	FAUX	-0.28365815413587	FAUX
1Q1B3	hi.sham	1	14287	5.421561843	5.418726261	0.004764457	4.902761749	4.900782105	0.017516364	0.904274624	0.901860468	0.000403949	7463	5.430561507	5.432597337	0.004459203	4.871131986	4.896694281	0.067026368	0.896934385	0.900424707	0.00206982	0.156237438	0.629505561	0.31755428	1.231153475	5.498730675	5.480929198	0.053216763	0.822047081171944	FAUX	0.916978945081438	FAUX	-0.231939590139387	FAUX	-0.192545769237311	FAUX	-1.03698041011728	FAUX	1.42167212785311	FAUX	1.38127351133701	FAUX	0.922389436687542	FAUX	0.971375006775984	FAUX	-0.259819509215453	FAUX
1Q1B5	hi.EMS	1	16884	5.419838808	5.417473354	0.00472881	4.899779238	4.897802972	0.01834807	0.904004057	0.902052024	0.000419864	8727	5.427670292	5.428356746	0.004466197	4.852415311	4.8734543	0.061542753	0.893950807	0.89645977	0.001868995	0.150223444	0.670791796	0.353916693	1.31377377	5.486963501	5.463955666	0.05065084	0.0630937068773758	FAUX	-0.133698863762615	FAUX	-0.680561738601586	FAUX	-0.678832082914782	FAUX	0.153872817030478	FAUX	0.55442213671802	FAUX	0.386155790814072	FAUX	0.126779690784373	FAUX	-0.0298992294866136	FAUX	-0.670814695264927	FAUX
1Q1C12	lo.EMS	1	19211	5.423477384	5.422552087	0.004634923	4.919509492	4.915539651	0.019778666	0.907031725	0.90534803	0.000461964	9329	5.432105176	5.43434052	0.004541375	4.821741893	4.855694776	0.079768895	0.887556905	0.892099347	0.002455249	0.121878015	0.627934398	0.336834952	1.411692917	5.506775966	5.486302935	0.047475163	-1.56336737368051	FAUX	-1.28917742074174	FAUX	0.629068681040183	FAUX	0.678703675653905	FAUX	1.56523708539221	FAUX	1.7781732479322	FAUX	1.69632290200774	FAUX	-1.1770881330124	FAUX	-0.795052773695042	FAUX	0.695228803823562	FAUX
1Q1C3	hi.sham	1	14623	5.422977833	5.421948429	0.004652192	4.909542797	4.909293875	0.020000275	0.905284357	0.903558015	0.00048377	7911	5.427621125	5.428325971	0.004703239	4.899872834	4.925067023	0.065652931	0.902713286	0.90562657	0.002012727	0.140184553	0.625837442	0.330039299	1.233088304	5.504531341	5.482553459	0.052585525	2.29206610318652	FAUX	2.29543263015814	FAUX	-0.359479409993251	FAUX	-0.328296972148479	FAUX	-1.00909262106219	FAUX	0.54812829265763	FAUX	1.47650006193675	FAUX	2.14410743811254	FAUX	2.19378975731839	FAUX	-0.362758172003091	FAUX
1Q1C6	hi.EMS	1	15244	5.419315309	5.416556469	0.004600152	4.912840732	4.914144738	0.017659834	0.906506338	0.904675061	0.000406523	8049	5.422237113	5.420544865	0.004557731	4.847307573	4.863203794	0.053013725	0.893905489	0.895715452	0.00157738	0.158404771	0.664306125	0.380776231	1.298642588	5.488254902	5.458470141	0.052605781	0.0515658537372028	FAUX	-0.330937408870179	FAUX	-1.33199929778896	FAUX	-1.43415753643187	FAUX	-0.06422150126335	FAUX	-1.04319803650773	FAUX	0.0645525361778662	FAUX	-0.0903403977099518	FAUX	-0.471533306831782	FAUX	-1.31006260921971	FAUX
1Q1C7	lo.sham	1	14328	5.422866288	5.421442682	0.004741264	4.912536769	4.911003047	0.019036053	0.905860572	0.904096332	0.000456321	7880	5.428422503	5.430008906	0.004551657	4.857278458	4.877042909	0.061637818	0.894732497	0.89680577	0.001877474	0.125	0.624873096	0.337977781	1.243732563	5.510655061	5.483329779	0.047064398	0.261937599395807	FAUX	-0.0420115250079264	FAUX	-0.661620535082049	FAUX	-0.657787048358344	FAUX	-0.85567087183282	FAUX	0.892307998701375	FAUX	1.52201385298485	FAUX	0.333502687735472	FAUX	0.124712847679902	FAUX	-0.663689603995428	FAUX
1Q1C8	lo.sham	1	17330	5.422128982	5.420524252	0.004557584	4.91009985	4.909604163	0.019436239	0.905527681	0.903944973	0.000464652	9356	5.426680064	5.427529114	0.004526135	4.846050618	4.876820926	0.075345345	0.892935413	0.896725443	0.002335178	0.148674647	0.658507909	0.329037	1.342484267	5.490113111	5.467554833	0.047023538	-0.195199088731926	FAUX	-0.0632975621759694	FAUX	0.360842563833636	FAUX	0.415130669843182	FAUX	0.567693513331135	FAUX	0.385161803744801	FAUX	0.597166372513944	FAUX	-0.14377112983316	FAUX	0.115148904456859	FAUX	0.363685149637564	FAUX
1Q1C9	lo.sham	1	17700	5.418958112	5.416802712	0.004610041	4.899448596	4.895223586	0.0185078	0.90408579	0.902073797	0.00042121	9863	5.42412234	5.423910737	0.004387027	4.833106127	4.858091848	0.072704339	0.890968358	0.894008845	0.002242341	0.162628004	0.709013485	0.335687108	1.366563057	5.470803265	5.448339874	0.04982502	-0.6955724758775	FAUX	-0.783175137570017	FAUX	0.153454368156877	FAUX	0.206660387548402	FAUX	0.914754786560832	FAUX	-0.354838215397395	FAUX	-0.52936087002003	FAUX	-0.694016469636066	FAUX	-0.69177702505883	FAUX	0.165742596718044	FAUX
1Q1D1	hi.sham	1	15937	5.420429964	5.418465364	0.0046138	4.924066308	4.92447054	0.020158036	0.908392629	0.906417767	0.000496717	9441	5.428092746	5.426529153	0.004441439	4.871155678	4.896024395	0.063812363	0.897346711	0.900405249	0.001959995	0.129117678	0.646117996	0.325285551	1.232977961	5.500525035	5.475562238	0.050455217	0.926933297992604	FAUX	0.911822724741867	FAUX	-0.477277209732869	FAUX	-0.455399890559778	FAUX	-1.01068305737863	FAUX	0.180658193661649	FAUX	1.06662144002164	FAUX	0.923396537900765	FAUX	0.942513554908496	FAUX	-0.500708153465449	FAUX
1Q1D10	lo.EMS	1	17419	5.420115101	5.41836179	0.004667831	4.919473889	4.916759163	0.018186265	0.907591646	0.905756478	0.000415575	10430	5.427548027	5.427710015	0.004511629	4.849919667	4.877186991	0.074477153	0.893518837	0.897327051	0.002316004	0.139213806	0.664141898	0.309728927	1.258422891	5.491027826	5.467648056	0.046983083	-0.0467894901075802	FAUX	0.0961239305799123	FAUX	0.318009843432221	FAUX	0.372418879081136	FAUX	-0.643930832576619	FAUX	0.422158154169962	FAUX	0.602631814783696	FAUX	0.0206946789591165	FAUX	0.130920494515304	FAUX	0.298614437604232	FAUX
1Q1D11	lo.EMS	1	18311	5.422854296	5.422618559	0.004537759	4.924236267	4.923510836	0.019591834	0.908008758	0.905964619	0.000460731	11035	5.427661993	5.428038363	0.004516178	4.853854181	4.879256487	0.071881108	0.894226646	0.897778322	0.002232973	0.152514726	0.666153149	0.312928149	1.248436547	5.486484271	5.465756006	0.047701405	0.133260781380566	FAUX	0.215707274646877	FAUX	0.132527231163007	FAUX	0.185386289057671	FAUX	-0.787869679318904	FAUX	0.489309124421347	FAUX	0.4917054334557	FAUX	0.187943278605817	FAUX	0.220082917963425	FAUX	0.104041697218955	FAUX
1Q1D12	lo.EMS	1	16385	5.422060539	5.42132747	0.00461253	4.93403519	4.934806386	0.019356408	0.909956118	0.908049077	0.000462126	7790	5.434421827	5.435553729	0.00428071	4.835460942	4.879557465	0.087576312	0.889708196	0.896453186	0.002733959	0.11322208	0.580231065	0.311981518	1.411121168	5.531614772	5.505987223	0.053151879	-1.01612860079121	FAUX	-0.135443573122033	FAUX	1.25167781335887	FAUX	1.26669996456242	FAUX	1.55699614239184	FAUX	2.02628854471386	FAUX	2.85036578504923	VRAI	-0.59391782691244	FAUX	0.233050291606377	FAUX	1.28039220469704	FAUX
1Q1D2	hi.sham	1	12787	5.425156134	5.426039299	0.004696735	4.928767845	4.928206319	0.020119344	0.908459994	0.90634453	0.000476004	7506	5.42943837	5.430026655	0.004499764	4.865853203	4.890745082	0.06770964	0.896136381	0.899494264	0.002074285	0.143485212	0.624567013	0.335810631	1.302641224	5.507754189	5.484595195	0.055155034	0.619053283623991	FAUX	0.670418706546932	FAUX	-0.22196524484929	FAUX	-0.182008648593791	FAUX	-0.00658688999999014	FAUX	0.895937874841808	FAUX	1.59620217663093	FAUX	0.697998555224483	FAUX	0.715058976005574	FAUX	-0.20860849189159	FAUX
1Q1D5	hi.EMS	1	18535	5.417648513	5.415539232	0.004568091	4.907435924	4.904488333	0.020938515	0.905782503	0.9039464	0.000512139	12099	5.416162601	5.413021324	0.004512015	4.853558378	4.873029812	0.060337035	0.896080356	0.898500621	0.001854424	0.21530705	0.751962972	0.324412309	1.186325962	5.43559862	5.418627718	0.047493427	0.604801816829805	FAUX	0.407110954112742	FAUX	-0.713111836075719	FAUX	-0.715109389545334	FAUX	-1.68310480995218	FAUX	-2.58184933901618	VRAI	-2.27131374998295	FAUX	0.175369263741128	FAUX	-0.0481879233543885	FAUX	-0.761182872777973	FAUX
1Q1D8	lo.sham	1	17201	5.417152905	5.413479145	0.004654854	4.911867811	4.908991398	0.018124595	0.9066838	0.904625995	0.000413068	9981	5.423521062	5.42284089	0.004438237	4.840328514	4.858693564	0.059102187	0.892413992	0.89431696	0.001798765	0.175633704	0.706542431	0.345737674	1.261662696	5.46792074	5.445230456	0.048329493	-0.3278365553502	FAUX	-0.701527032424326	FAUX	-0.83744824917796	FAUX	-0.855012616792852	FAUX	-0.597233683412731	FAUX	-0.573634322182071	FAUX	-0.711658635288522	FAUX	-0.387006731748076	FAUX	-0.665852617962833	FAUX	-0.853734334451124	FAUX
1Q1E1	hi.sham	1	15274	5.422381694	5.421350515	0.00471799	4.936812795	4.938224425	0.017974692	0.91041963	0.908225288	0.000421749	9007	5.428782774	5.429376751	0.004451486	4.873547972	4.89620644	0.062874623	0.897664987	0.900551209	0.001915253	0.145109359	0.645164872	0.342504694	1.287216845	5.497147385	5.473300074	0.052536912	1.0078953657371	FAUX	0.950501002096307	FAUX	-0.577226181058629	FAUX	-0.564591352694233	FAUX	-0.228907223144527	FAUX	0.763024977031518	FAUX	0.93399615713241	FAUX	1.02508834060961	FAUX	0.950356804364693	FAUX	-0.570991465799745	FAUX
1Q1E11	lo.EMS	1	15462	5.422736925	5.420954467	0.004654118	4.937904381	4.936709734	0.020103393	0.910555248	0.908483402	0.000488144	8831	5.426602642	5.426984336	0.004513354	4.87396278	4.893348347	0.064388111	0.898106921	0.901169291	0.001972245	0.15287057	0.659268486	0.33099728	1.250194508	5.493164975	5.466615567	0.047973758	1.12031317432649	FAUX	1.11428797814308	FAUX	-0.449911984692849	FAUX	-0.425722042381319	FAUX	-0.76253118918098	FAUX	0.273748390927879	FAUX	0.542099445908144	FAUX	1.04272102843898	FAUX	0.827218369537969	FAUX	-0.45755602546638	FAUX
1Q1E12	lo.EMS	1	13539	5.423232205	5.422981119	0.004697832	4.939303468	4.938119266	0.017673664	0.910741984	0.908708068	0.000421197	7443	5.426550498	5.425980675	0.004525623	4.863223721	4.884789702	0.070480683	0.896141174	0.899058237	0.002189318	0.150745667	0.625957275	0.308354994	1.216877508	5.507482846	5.479149012	0.051180134	0.620272512188821	FAUX	0.554874905231337	FAUX	0.0350065047040638	FAUX	0.0856550014978706	FAUX	-1.2427480289887	FAUX	0.0684880879764557	FAUX	1.27690544967328	FAUX	0.586224348220441	FAUX	0.458476642261281	FAUX	-0.000919707515573345	FAUX
1Q1E3	hi.sham	1	10997	5.422987258	5.422040468	0.004697435	4.952429008	4.951143156	0.020994674	0.913197223	0.910390776	0.000523194	7390	5.428967209	5.430113773	0.004877709	4.889172894	4.894277285	0.042279449	0.900519297	0.900573577	0.001220202	0.177807848	0.60202977	0.41321793	1.216566614	5.5023689	5.490652934	0.068733022	1.73396594468047	FAUX	0.956428350053719	FAUX	-2.12989777528644	FAUX	-2.46217254883464	FAUX	-1.24722912074952	FAUX	0.913754515194119	FAUX	1.95135297407268	FAUX	1.68927363111534	FAUX	0.867240850041962	FAUX	-2.11459315371024	FAUX
1Q1E4	hi.EMS	1	31756	5.423117912	5.422535673	0.004587348	4.935256217	4.93530065	0.018573629	0.909997336	0.907767201	0.000425653	6434	5.441022946	5.447365823	0.004539218	4.641144381	4.914025652	0.406548697	0.852648884	0.90290833	0.013151032	0.126204538	0.339291265	0.325946628	3.084695342	5.65451638	5.695909612	0.101184269	-10.4431621462305	VRAI	1.57511993739348	FAUX	24.5223347034252	VRAI	14.6711958443925	VRAI	25.679171038754	VRAI	4.44199862304699	VRAI	13.9850627248467	VRAI	-8.85393995808612	VRAI	1.7180819538001	FAUX	25.1872701889682	VRAI
1Q1E5	hi.EMS	1	13612	5.422689968	5.42046158	0.004550152	4.94227979	4.94029978	0.019685953	0.911372275	0.90898801	0.000478823	7361	5.427823158	5.430071011	0.004671009	4.878118007	4.893020664	0.056837102	0.898670283	0.899844413	0.001719648	0.140334194	0.636462437	0.355588618	1.240390584	5.501471592	5.477785217	0.050249229	1.26361946323507	FAUX	0.763205498389753	FAUX	-1.0141873928099	FAUX	-1.05765937444212	FAUX	-0.903840712877444	FAUX	0.905009190751987	FAUX	1.19694939976804	FAUX	1.21935171191455	FAUX	0.81310043434855	FAUX	-1.02350172895144	FAUX
1Q1E7	lo.sham	1	15430	5.421171075	5.419442713	0.00468954	4.935219594	4.931043208	0.019863806	0.910321903	0.907403708	0.000473834	8961	5.4270364	5.426547044	0.004515637	4.864047246	4.884050139	0.066941145	0.896195615	0.898354022	0.002049058	0.17542685	0.688985604	0.34532915	1.329597843	5.474053315	5.456347811	0.051479277	0.63412104594592	FAUX	0.368263346673139	FAUX	-0.278319737264357	FAUX	-0.241692756830735	FAUX	0.381954166760244	FAUX	0.184317110447522	FAUX	-0.0598746126205156	FAUX	0.62123080721998	FAUX	0.42661321784657	FAUX	-0.266206945740574	FAUX
1Q1E8	lo.sham	1	14667	5.424740763	5.423773262	0.004706065	4.935035971	4.934483301	0.021308165	0.909688965	0.907710936	0.000526137	8830	5.431042111	5.432709598	0.004448712	4.866145878	4.893364999	0.068669639	0.895919744	0.899612383	0.002098745	0.155152888	0.642582106	0.342210017	1.344491165	5.497146119	5.476256873	0.052450382	0.56394583138138	FAUX	0.701719333039327	FAUX	-0.167324150606116	FAUX	-0.124484742852553	FAUX	0.596620073807062	FAUX	1.44463080301296	FAUX	1.10734623423623	FAUX	0.710439604843718	FAUX	0.827935806380214	FAUX	-0.136656874644152	FAUX
1Q1E9	lo.sham	1	15169	5.424106895	5.423369589	0.004658659	4.934410874	4.936493635	0.020838338	0.909684726	0.908238704	0.000518698	7664	5.43063217	5.431420058	0.004529363	4.860338373	4.900530982	0.100679021	0.894919972	0.901102734	0.003194357	0.159316284	0.653444676	0.280830374	1.324021459	5.484901327	5.472188717	0.052863284	0.309626911974806	FAUX	1.09665088506361	FAUX	2.28015902788744	FAUX	2.17580008516538	FAUX	0.301578577660555	FAUX	1.18090493235752	FAUX	0.868839945418354	FAUX	0.46357377117501	FAUX	1.13667591057375	FAUX	2.26243604315162	FAUX
1Q1F1	hi.sham	1	13156	5.423494753	5.421719065	0.004656857	4.948854449	4.947065935	0.017651218	0.912455476	0.910321631	0.000416389	7798	5.429779624	5.431947257	0.004444947	4.905727497	4.925497736	0.054217272	0.903434177	0.905442594	0.001631081	0.144395999	0.611567068	0.355987785	1.243284868	5.508141915	5.486927542	0.055639779	2.47544413350734	FAUX	2.24668040520227	FAUX	-1.21203685290128	FAUX	-1.29012354309103	FAUX	-0.862123754088057	FAUX	1.2887232360036	FAUX	1.73294212151152	FAUX	2.39297786738369	FAUX	2.21234664986157	FAUX	-1.21985714746058	FAUX
1Q1F10	lo.EMS	1	25112	5.421518177	5.419622056	0.004546283	4.948685973	4.947183661	0.017421916	0.912747643	0.910517425	0.000394715	9100	5.438429914	5.440765867	0.004364247	4.819879891	4.873994485	0.123640549	0.88615128	0.895339028	0.003904225	0.132307692	0.572637363	0.308589424	1.642505515	5.524180742	5.512025649	0.060247888	-1.92092592812177	FAUX	-0.430686873619898	FAUX	3.8659302579861	VRAI	3.45740017539366	VRAI	4.89207012556299	VRAI	3.09223115372651	VRAI	3.20438430733831	VRAI	-1.25623824584444	FAUX	-0.0066258316591502	FAUX	3.98339520464275	VRAI
1Q1F2	hi.sham	1	18894	5.421248917	5.418862859	0.004748036	4.945799067	4.943692327	0.021259323	0.912259153	0.910122448	0.000517806	12559	5.425490346	5.425245572	0.004462888	4.874645044	4.894252352	0.061894833	0.898415944	0.900876683	0.001888851	0.151684051	0.667170953	0.338541012	1.260754359	5.482938792	5.4626106	0.049480703	1.1989214924548	FAUX	1.03674910872594	FAUX	-0.636205501181616	FAUX	-0.62962364348905	FAUX	-0.610326060386058	FAUX	-0.0818489924525857	FAUX	0.307297777533533	FAUX	1.07172275485026	FAUX	0.866166633564188	FAUX	-0.644426412151634	FAUX
1Q1F4	hi.EMS	1	13733	5.424459491	5.423317158	0.00463729	4.956560223	4.956641379	0.021498448	0.913704114	0.911624135	0.000530479	8197	5.427622548	5.429274131	0.004569944	4.881349416	4.906291933	0.070934568	0.899288349	0.90229599	0.002181833	0.160058558	0.64560205	0.334147786	1.316473472	5.493677083	5.471860616	0.051694629	1.42084118703005	FAUX	1.41285454718235	FAUX	0.0182857937306318	FAUX	0.0684557375756561	FAUX	0.19278515496194	FAUX	0.742037998072473	FAUX	0.849604165898727	FAUX	1.35671267444656	FAUX	1.38488144106326	FAUX	0.0330988277061856	FAUX
1Q1F9	lo.sham	1	16726	5.422472164	5.422197386	0.004690154	4.947544086	4.946923641	0.019803039	0.912379173	0.909997314	0.000477466	9682	5.432991638	5.436234228	0.004615019	4.857116014	4.898549673	0.101506215	0.893920584	0.900229259	0.003189406	0.145940921	0.644598224	0.304028441	1.425849883	5.492811361	5.479970271	0.052902787	0.0554056733044974	FAUX	0.86518672836198	FAUX	2.26909900917942	FAUX	2.16638616777519	FAUX	1.76928947527681	FAUX	2.1654584744991	FAUX	1.32505390716812	FAUX	0.326597506683635	FAUX	1.0513129468185	FAUX	2.32443396823006	FAUX
1Q1G10	lo.EMS	1	18824	5.417145302	5.413822615	0.004573476	4.941420374	4.937517892	0.01906755	0.912144135	0.910031933	0.00045383	12955	5.424031948	5.424284478	0.004505404	4.834746716	4.86984165	0.081651412	0.891287179	0.895583948	0.002547457	0.176534157	0.722578155	0.315987443	1.345193588	5.454359884	5.44356806	0.04855954	-0.61447177271305	FAUX	-0.365784957412386	FAUX	0.835051756182234	FAUX	0.876765309944348	FAUX	0.606744495371678	FAUX	-0.278403850721185	FAUX	-0.809120950034026	FAUX	-0.624278196282413	FAUX	-0.18554709209175	FAUX	0.836322849385896	FAUX
1Q1G11	lo.EMS	1	18196	5.4193915	5.417446781	0.004622266	4.942470123	4.940770413	0.019818997	0.911960244	0.909810501	0.000475261	11209	5.426714075	5.427190636	0.004526799	4.873333126	4.899596187	0.069422911	0.897981342	0.901576966	0.002159544	0.168436078	0.685074494	0.304605854	1.192872551	5.474122306	5.457076116	0.048289423	1.08836877542338	FAUX	1.22231871752697	FAUX	-0.031505512466675	FAUX	0.0170639095225061	FAUX	-1.58874510526388	FAUX	0.315939131126759	FAUX	-0.0171758265667081	FAUX	1.01595565163211	FAUX	1.0964010863522	FAUX	-0.0801993797642493	FAUX
1Q1G2	hi.sham	1	14189	5.424723262	5.425349149	0.004679648	4.957362666	4.95752108	0.021207497	0.913809261	0.911627263	0.000524383	8786	5.430808158	5.434921625	0.004627918	4.8817767	4.905326265	0.067270841	0.898851021	0.901642606	0.002073117	0.142271796	0.628158434	0.324413375	1.236856658	5.508442786	5.483879579	0.050593252	1.30959503852196	FAUX	1.23971281265951	FAUX	-0.224574435285758	FAUX	-0.184763959316146	FAUX	-0.954777195028729	FAUX	1.89701595313503	FAUX	1.55424731639974	FAUX	1.37487569296712	FAUX	1.34327648066405	FAUX	-0.241496336250343	FAUX
1Q1G3	hi.sham	1	12624	5.424451968	5.42449942	0.004525575	4.964368667	4.964254915	0.01987572	0.91515668	0.912962133	0.000498668	8087	5.430852974	5.434089638	0.004543652	4.892033947	4.91457056	0.071505657	0.900721336	0.903433917	0.002197076	0.144429331	0.610733276	0.332074626	1.317356641	5.510968449	5.488655047	0.053808101	1.78536000268369	FAUX	1.71439644986187	FAUX	0.0523370692641025	FAUX	0.103450572483025	FAUX	0.20551477125981	FAUX	1.7268649722045	FAUX	1.83422162172349	FAUX	1.81089147458089	FAUX	1.74155883794783	FAUX	0.0759017651490598	FAUX
1Q1G4	hi.EMS	1	13556	5.423665298	5.423328628	0.004717978	4.952349944	4.949175246	0.018238566	0.913061636	0.910768847	0.000416856	8212	5.429212568	5.431796235	0.004652679	4.891135611	4.909342038	0.05538795	0.900837712	0.903054748	0.001663589	0.155260594	0.629566488	0.361136708	1.246027846	5.502284804	5.479789017	0.052747486	1.81496337081647	FAUX	1.61391958122521	FAUX	-1.13941736428079	FAUX	-1.20408255736516	FAUX	-0.82258765459464	FAUX	1.25783748725748	FAUX	1.31442741721212	FAUX	1.77270494429732	FAUX	1.51629254481569	FAUX	-1.13211520671273	FAUX
1Q1G6	hi.EMS	1	19085	5.419571231	5.417185945	0.004590591	4.941860415	4.939189663	0.018349552	0.911812986	0.909528413	0.000420706	12321	5.421896888	5.420712215	0.004438402	4.889675081	4.916635524	0.069893176	0.901783638	0.905388317	0.002170723	0.179530882	0.728674621	0.318668266	1.264569974	5.457240615	5.438801741	0.044699339	2.05558511073177	FAUX	2.23229741767165	FAUX	-0.00653278995872558	FAUX	0.0428723511627727	FAUX	-0.555329434722796	FAUX	-1.00897302258481	FAUX	-1.08855887129667	FAUX	1.71062063166251	FAUX	1.83052600414346	FAUX	-0.0449531687943773	FAUX
1Q1G8	lo.sham	1	15312	5.422076452	5.420829235	0.004595075	4.955386242	4.953491496	0.022129748	0.91388553	0.911667761	0.000546615	9990	5.425031766	5.424981219	0.004490305	4.878639507	4.899672795	0.070073543	0.899218468	0.901991359	0.002157123	0.175075075	0.666466466	0.334874258	1.322881366	5.482556564	5.458576665	0.053605121	1.40306507366917	FAUX	1.33212967523963	FAUX	-0.0369137744929512	FAUX	0.0114658651766627	FAUX	0.285145769858327	FAUX	-0.135912243755559	FAUX	0.0707977843713797	FAUX	1.2415196708329	FAUX	1.09970167496676	FAUX	-0.0314347199750882	FAUX
1Q1H1	hi.sham	1	16348	5.419721136	5.416437456	0.00465051	4.936142769	4.935043502	0.021269254	0.910731369	0.908591051	0.000516162	10529	5.426665048	5.427483675	0.004308306	4.877986702	4.91785459	0.090713995	0.898808833	0.904464053	0.002842803	0.156425112	0.671003894	0.319694476	1.46696249	5.481478289	5.460257199	0.054304923	1.29886338513306	FAUX	1.98737456661161	FAUX	1.49482398105323	FAUX	1.48813682861047	FAUX	2.3618688254523	FAUX	0.375869001786967	FAUX	0.169323486820431	FAUX	1.21377018967911	FAUX	1.88304839553886	FAUX	1.51556053951801	FAUX
1Q1H12	lo.EMS	1	13472	5.426096046	5.424411168	0.004477266	4.951124328	4.952593891	0.020217808	0.912426533	0.910606049	0.000491229	7736	5.431519891	5.433621045	0.00455462	4.875227267	4.903165982	0.074911648	0.897518047	0.9011255	0.002320097	0.106902792	0.591520165	0.320956755	1.301652726	5.52884325	5.500604862	0.047645772	0.970517221502628	FAUX	1.10268369995983	FAUX	0.32715317943947	FAUX	0.381551199569787	FAUX	-0.0208346729851421	FAUX	1.63103227456968	FAUX	2.53481078981598	FAUX	1.09647193135135	FAUX	1.25020257879915	FAUX	0.331179698542967	FAUX
1Q1H3	hi.sham	1	13819	5.420666583	5.418487733	0.004708831	4.941883295	4.944307436	0.024236246	0.911633166	0.910063135	0.00061936	8543	5.423935144	5.423453958	0.004583893	4.872932997	4.90131117	0.072988989	0.898353044	0.901919401	0.002259608	0.171953646	0.665105935	0.321462467	1.282749139	5.488213979	5.45876019	0.053937428	1.18292118435389	FAUX	1.31306135870172	FAUX	0.192027049035736	FAUX	0.245756466565864	FAUX	-0.293302806675758	FAUX	-0.448254813154879	FAUX	0.0815574176438604	FAUX	0.998946939773913	FAUX	1.17028962754884	FAUX	0.187077022951283	FAUX
1Q1H5	hi.EMS	1	14422	5.42019266	5.417671769	0.004736709	4.941146699	4.941203242	0.021970105	0.911575584	0.909619362	0.000538759	8971	5.425970075	5.42575832	0.004406671	4.874785516	4.903491524	0.080747657	0.898357885	0.902729432	0.002525618	0.152937242	0.649648869	0.302501978	1.294904821	5.491123236	5.467861062	0.049122202	1.18415262301074	FAUX	1.52771334338036	FAUX	0.786265703149664	FAUX	0.830183762209721	FAUX	-0.118096059497213	FAUX	0.0230139142636701	FAUX	0.615119848810897	FAUX	1.07769394857065	FAUX	1.26422827087786	FAUX	0.768586701905057	FAUX
1Q1H9	lo.sham	1	14792	5.422905497	5.421747023	0.004715242	4.948113753	4.945601512	0.018088092	0.912412015	0.910281607	0.00041735	8664	5.428050664	5.429447844	0.00459795	4.866765423	4.911495853	0.10278879	0.896548888	0.903252722	0.003286869	0.144506002	0.647045245	0.252770369	1.195134928	5.494704197	5.473351916	0.048551778	0.723985542666687	FAUX	1.66638116851603	FAUX	2.48682120738966	FAUX	2.35038083327047	FAUX	-1.55613618088913	FAUX	0.777564319217466	FAUX	0.937035530014128	FAUX	0.736775267562961	FAUX	1.60908777856289	FAUX	2.4205625532506	FAUX
1Q2A1	hi.sham	1	19840	5.416384841	5.412985248	0.004619278	4.888427996	4.884860475	0.019379263	0.902487287	0.900429755	0.000463434	10871	5.422205048	5.421699329	0.004452298	4.821537044	4.853670839	0.079449773	0.88912886	0.893983857	0.002446654	0.162266581	0.713457824	0.353873919	1.494867739	5.464927206	5.445492113	0.046556556	-1.16349830657743	FAUX	-0.78979676537579	FAUX	0.609868345593737	FAUX	0.660053647448025	FAUX	2.76408302507494	VRAI	-0.807096772847595	FAUX	-0.696318309103075	FAUX	-1.18579586880617	FAUX	-0.882252327512158	FAUX	0.671310712243012	FAUX
1Q2A12	lo.EMS	1	20718	5.422343646	5.421203994	0.004561741	4.891667112	4.892222643	0.019773348	0.902086919	0.900712656	0.000467348	9680	5.436752706	5.439922933	0.0042233	4.884636013	4.921522609	0.083008746	0.898382928	0.903990122	0.002600364	0.118698347	0.661880165	0.303896698	1.347292583	5.494263594	5.479149012	0.042102569	1.19052298415177	FAUX	1.86178649683312	FAUX	0.953240487708138	FAUX	0.988792373834237	FAUX	0.636998502205191	FAUX	2.91984138446388	VRAI	1.27690544967328	FAUX	1.49641957238948	FAUX	2.04108178303697	FAUX	0.938054597486606	FAUX
1Q2A2	hi.sham	1	14014	5.420788739	5.419976386	0.004707289	4.903523227	4.903138841	0.016665056	0.904543043	0.9025596	0.000374778	8107	5.429297282	5.430008906	0.004473159	4.856228254	4.880281828	0.069254886	0.894370805	0.897877436	0.002110878	0.151103984	0.663130628	0.357505903	1.406699312	5.490281861	5.46805327	0.048349833	0.169931503407914	FAUX	0.241971722315488	FAUX	-0.140220291388927	FAUX	-0.0960752913885125	FAUX	1.49326142094619	FAUX	0.892307998701375	FAUX	0.626388545675333	FAUX	0.288860541756769	FAUX	0.264258837327721	FAUX	-0.0927927996407293	FAUX
1Q2A3	hi.sham	1	16207	5.419330236	5.417453424	0.004703661	4.891846609	4.891464976	0.019025752	0.902627933	0.900776755	0.000449477	10092	5.424589652	5.424458565	0.004431228	4.834847837	4.866316882	0.07597087	0.89120818	0.895588695	0.002347303	0.138624653	0.673801031	0.335935835	1.390970289	5.485431769	5.46144675	0.045052439	-0.63456729480628	FAUX	-0.364527038923727	FAUX	0.387928551883451	FAUX	0.442049730492386	FAUX	1.26655008083984	FAUX	-0.242801042243043	FAUX	0.23906402635965	FAUX	-0.619979737655782	FAUX	-0.337408635661983	FAUX	0.410568047826733	FAUX
1Q2A4	hi.EMS	1	17454	5.41999804	5.418418137	0.00456462	4.888120937	4.88759198	0.019315772	0.901828378	0.899678773	0.000460582	10266	5.426279478	5.42611908	0.004446644	4.838623902	4.865059533	0.069442348	0.891636106	0.895152571	0.002134362	0.160140269	0.692772258	0.33613748	1.328351277	5.470345286	5.455423534	0.048353692	-0.525712798075057	FAUX	-0.480096544493258	FAUX	-0.0877594795652686	FAUX	-0.0413184471592136	FAUX	0.363986703149125	FAUX	0.0967935140416934	FAUX	-0.114062769886258	FAUX	-0.459466499318096	FAUX	-0.391580416598031	FAUX	-0.078742582846296	FAUX
1Q2A5	hi.EMS	1	16022	5.420642434	5.418603699	0.004705417	4.893193496	4.893178982	0.019109537	0.90266225	0.900786139	0.000459148	9452	5.428568229	5.42944219	0.004581286	4.839810802	4.872802861	0.078117493	0.89147485	0.896092395	0.002418005	0.149703766	0.671603893	0.324348033	1.339342773	5.485033479	5.468447028	0.046972373	-0.566732602258222	FAUX	-0.231050413112334	FAUX	0.545869461334837	FAUX	0.597651296665211	FAUX	0.52241337643541	FAUX	0.776408010709896	FAUX	0.649473638595133	FAUX	-0.40901367009431	FAUX	-0.0579659085082563	FAUX	0.571456753409287	FAUX
1Q2A7	lo.sham	1	16697	5.418004294	5.414176679	0.004620598	4.891944825	4.888581015	0.017476692	0.9028686	0.900820188	0.000402463	10267	5.426159538	5.425208051	0.004492039	4.847633613	4.871304337	0.065401461	0.89331732	0.896482922	0.001995415	0.150871725	0.70341872	0.345127833	1.31689737	5.47318308	5.453020042	0.044122458	-0.098050763359946	FAUX	-0.127563761835299	FAUX	-0.398152616188583	FAUX	-0.369839460630793	FAUX	0.198895037543229	FAUX	-0.0895224716720836	FAUX	-0.254973776525015	FAUX	-0.0764810663087127	FAUX	-0.122528503186007	FAUX	-0.381605767874768	FAUX
1Q2A8	lo.sham	1	17609	5.414728203	5.410451601	0.004662283	4.883078288	4.880785019	0.018902616	0.901774395	0.900048539	0.000445181	10484	5.420647299	5.418636	0.00449386	4.815628927	4.853968801	0.089295055	0.888302702	0.893865697	0.002793034	0.187046929	0.740080122	0.322050253	1.435580629	5.44887311	5.430770628	0.050364328	-1.37365383185628	FAUX	-0.821108256552853	FAUX	1.38364521492941	FAUX	1.38742053439796	FAUX	1.9095442429057	FAUX	-1.43358304518416	FAUX	-1.55940388233043	FAUX	-1.4369385244935	FAUX	-0.869414895588926	FAUX	1.40921144146991	FAUX
1Q2A9	lo.sham	1	14203	5.421834099	5.420522603	0.00452187	4.899213306	4.898947207	0.01871919	0.903575874	0.90126664	0.000453738	8007	5.428801684	5.42998793	0.004624619	4.843267793	4.880802163	0.087434312	0.892084246	0.897480167	0.002752191	0.154364931	0.650056201	0.291460257	1.26730834	5.492025868	5.472652616	0.04899916	-0.411716326336629	FAUX	0.136698492894263	FAUX	1.2924062038021	FAUX	1.30409525188647	FAUX	-0.51585981060427	FAUX	0.888018163672695	FAUX	0.896037237969687	FAUX	-0.262063651936724	FAUX	0.286677015282588	FAUX	1.26974935022622	FAUX
1Q2B10	lo.EMS	1	14738	5.424479108	5.421955826	0.004709351	4.909112181	4.907841143	0.018770742	0.904953905	0.903017714	0.000438728	9249	5.43032144	5.431350896	0.004466686	4.85090366	4.877137981	0.066025956	0.893254132	0.896725967	0.002040705	0.141312574	0.637366202	0.310043303	1.192029457	5.496246694	5.478906872	0.048741908	-0.114124332013045	FAUX	-0.0631587062063089	FAUX	-0.296979469897768	FAUX	-0.261535853067285	FAUX	-1.60089709783047	FAUX	1.16676050204418	FAUX	1.26270935867422	FAUX	0.0625223230626034	FAUX	0.128808941570411	FAUX	-0.334800067855352	FAUX
1Q2B12	lo.EMS	1	20638	5.420339613	5.419197135	0.004602176	4.909726072	4.911538449	0.018787955	0.905752886	0.90403777	0.00043226	10711	5.425412848	5.425132998	0.004292084	4.774776546	4.823839248	0.107384367	0.880018491	0.887879037	0.003451406	0.140976566	0.703482401	0.254835614	1.274666441	5.47374587	5.453032284	0.048205706	-3.48096588866129	VRAI	-2.40752711039448	FAUX	2.8543797406476	VRAI	2.65491595482139	VRAI	-0.409803322648993	FAUX	-0.104871679738893	FAUX	-0.254256057246898	FAUX	-3.17349442809008	VRAI	-2.16752031009025	FAUX	2.76499957592992	VRAI
1Q2B4	hi.EMS	1	15955	5.419559708	5.416389176	0.004594074	4.89323644	4.892205946	0.02104239	0.902840123	0.901121299	0.000513562	9632	5.423392419	5.423092615	0.004610387	4.835657543	4.858564265	0.069864815	0.891569211	0.894685726	0.002155483	0.157184385	0.700166113	0.328101102	1.277227443	5.476359177	5.450586248	0.04665135	-0.542729341960768	FAUX	-0.603806878773438	FAUX	-0.040577363804431	FAUX	0.00767193122438247	FAUX	-0.37289014657728	FAUX	-0.522153643187435	FAUX	-0.39766131719146	FAUX	-0.58556069768654	FAUX	-0.671423352184804	FAUX	-0.0470788166510468	FAUX
1Q2B5	hi.EMS	1	20964	5.418382212	5.415600117	0.004538943	4.888192073	4.88718673	0.019735054	0.902104037	0.9003226	0.000465559	6563	5.433214489	5.436009901	0.004463754	4.760457645	4.847686768	0.166287449	0.876100228	0.890704494	0.005411446	0.152521713	0.622428767	0.226147607	1.380294054	5.500723272	5.486692535	0.060705521	-4.47768155194326	VRAI	-1.65880273728514	FAUX	7.23290510288761	VRAI	5.83764104541864	VRAI	1.11266744336514	FAUX	2.11958100393871	FAUX	1.7191642212992	FAUX	-3.78216328547114	VRAI	-1.14007078787434	FAUX	7.17976668585238	VRAI
1Q2B8	lo.sham	1	17683	5.415366111	5.411618022	0.004569496	4.888606882	4.884953877	0.02045551	0.902688861	0.900893312	0.000499466	9837	5.420549019	5.417916555	0.004407715	4.81646829	4.85427567	0.094293681	0.888495373	0.893699271	0.002998768	0.17810308	0.718816712	0.281305083	1.301104367	5.458133432	5.437720446	0.048619267	-1.32464277681476	FAUX	-0.865209866493848	FAUX	1.84323355847091	FAUX	1.79817618720842	FAUX	-0.0287384826336727	FAUX	-1.58071788319913	FAUX	-1.15195261961096	FAUX	-1.40125882266873	FAUX	-0.856193713368177	FAUX	1.78385685747043	FAUX
1Q2B9	lo.sham	1	19510	5.417566994	5.41496249	0.004579637	4.891329002	4.887935028	0.017777761	0.902823646	0.900859699	0.000405888	11121	5.421013757	5.418218403	0.004407881	4.78109495	4.842003551	0.126367056	0.881871354	0.892549828	0.004064375	0.203039295	0.750562	0.269941501	1.445345521	5.434562469	5.427140289	0.051426808	-3.00964031046102	VRAI	-1.16980342059852	FAUX	4.22368868983583	VRAI	3.72996741856713	VRAI	2.05029117622213	FAUX	-1.51898646997761	FAUX	-1.77224200408413	FAUX	-2.90491126356148	VRAI	-1.38492721702499	FAUX	4.18774603009826	VRAI
1Q2C1	hi.sham	1	13992	5.421688278	5.419549336	0.004650382	4.928310936	4.9324763	0.023800797	0.908964659	0.907582419	0.000620552	8453	5.430016416	5.4319328	0.004568346	4.870672242	4.892917868	0.06591238	0.896921542	0.90018395	0.002003527	0.13072282	0.631964983	0.352806267	1.340109465	5.506260656	5.482627795	0.051319429	0.818780118422489	FAUX	0.853180191854361	FAUX	-0.380031252472286	FAUX	-0.35035127470482	FAUX	0.533464143591693	FAUX	1.28576661200434	FAUX	1.48085820441839	FAUX	0.90284660618906	FAUX	0.80867155867989	FAUX	-0.343312552639705	FAUX
1Q2C12	lo.EMS	1	15323	5.422096696	5.419377405	0.004633935	4.93087434	4.930256051	0.020693384	0.909367399	0.907513114	0.00050692	8520	5.428751042	5.428510588	0.004465627	4.842535556	4.870719854	0.079042111	0.891953434	0.895518091	0.002469417	0.136971831	0.639671362	0.310792576	1.307551142	5.497283423	5.477378136	0.049618793	-0.444991879648191	FAUX	-0.383236555875864	FAUX	0.660718518457897	FAUX	0.709375274010243	FAUX	0.0641825461939973	FAUX	0.585884608136709	FAUX	1.17308321111687	FAUX	-0.293189634169737	FAUX	-0.147710441563383	FAUX	0.640756576050864	FAUX
1Q2C2	hi.sham	1	16132	5.420035886	5.41719093	0.004757806	4.911511772	4.912099778	0.020496951	0.906139888	0.904594217	0.00050066	10817	5.426529816	5.425887837	0.004511861	4.847170893	4.864819487	0.058373228	0.89318152	0.895709142	0.001768951	0.164278451	0.687066654	0.347028482	1.248228562	5.476635569	5.456997275	0.04782239	-0.132595148735229	FAUX	-0.332609510337081	FAUX	-0.904049622185564	FAUX	-0.930843253370979	FAUX	-0.790867485226623	FAUX	0.049501641352233	FAUX	-0.0217980864595468	FAUX	-0.0961504008258827	FAUX	-0.401922588363056	FAUX	-0.908369577776456	FAUX
1Q2C5	hi.EMS	1	18654	5.421554197	5.420168715	0.004612358	4.911789081	4.912524947	0.020733123	0.905927822	0.903972566	0.000493387	10030	5.431037889	5.433054218	0.004348675	4.854811794	4.899804093	0.111753709	0.893832911	0.90094946	0.003576979	0.158624128	0.673579262	0.267823114	1.357689825	5.474407066	5.466028607	0.050897452	0.0331036858302183	FAUX	1.05603445396451	FAUX	3.13489675321498	VRAI	2.88247894461267	VRAI	0.786859855146816	FAUX	1.51510958579227	FAUX	0.507687380273375	FAUX	0.228649559801775	FAUX	1.10535853435374	FAUX	3.09248035789652	VRAI
1Q2C7	lo.sham	1	17706	5.422798065	5.422057725	0.004574618	4.909446828	4.910389588	0.019579514	0.905290244	0.903858301	0.000458245	11209	5.425634638	5.425279829	0.004610856	4.834411027	4.855958072	0.064371309	0.890961291	0.893742694	0.001954236	0.150593273	0.691943974	0.357858522	1.33710878	5.478265426	5.456513304	0.043223267	-0.697370157552362	FAUX	-0.853703105480151	FAUX	-0.490142216345561	FAUX	-0.469384159628473	FAUX	0.490213566770298	FAUX	-0.074843039049736	FAUX	-0.0501721525242662	FAUX	-0.638547688058726	FAUX	-0.783708896033913	FAUX	-0.458815329979189	FAUX
1Q2C8	lo.sham	1	17245	5.417251544	5.415038487	0.004641465	4.904740551	4.903361336	0.020123505	0.905351316	0.903835444	0.000483294	10113	5.423478493	5.422488884	0.004397271	4.832631187	4.862405709	0.082160218	0.890994003	0.894689168	0.002575769	0.185009394	0.703549886	0.304374111	1.315669757	5.46171744	5.445263172	0.054176625	-0.689048979832216	FAUX	-0.60289477524744	FAUX	0.898297817515543	FAUX	0.936857253682661	FAUX	0.181200754283426	FAUX	-0.645623627535854	FAUX	-0.709740574195263	FAUX	-0.714205252778337	FAUX	-0.505918100384241	FAUX	0.874457695948444	FAUX
1Q2D1	hi.sham	1	17076	5.419242463	5.417131099	0.004534784	4.937315973	4.933370853	0.019100119	0.911035519	0.908645156	0.000457694	10858	5.428935749	5.430132323	0.00446165	4.878037484	4.905628603	0.083275521	0.898453766	0.902352701	0.002586675	0.152974765	0.67203905	0.317564659	1.371965213	5.484210259	5.465138864	0.052561595	1.20854253622258	FAUX	1.42788252599192	FAUX	0.922660686436887	FAUX	0.959916964696795	FAUX	0.992619128562461	FAUX	0.917548205114897	FAUX	0.455523869107204	FAUX	1.2159288345301	FAUX	1.3563024487164	FAUX	0.95804929820107	FAUX
1Q2D11	lo.EMS	1	15648	5.418420104	5.415530891	0.004592053	4.920237352	4.919919703	0.017441102	0.90801596	0.906222904	0.000390794	9617	5.425888367	5.425836524	0.004478897	4.845673023	4.869378415	0.06220845	0.89300221	0.895993881	0.001889347	0.144015805	0.680149735	0.350656198	1.306834739	5.486653879	5.461193783	0.045545664	-0.178207473784115	FAUX	-0.257155865395817	FAUX	-0.635097488804486	FAUX	-0.628397743271514	FAUX	0.0538566229509422	FAUX	0.039007538337992	FAUX	0.224233174159401	FAUX	-0.159821964824104	FAUX	-0.205505166534017	FAUX	-0.620920918556027	FAUX
1Q2D12	lo.EMS	1	17131	5.417674027	5.414473622	0.004733978	4.922937202	4.920616326	0.020261039	0.908637865	0.906750511	0.000479781	10979	5.424847962	5.424807343	0.004523168	4.837206421	4.866121862	0.07546371	0.891602393	0.895901267	0.002328897	0.161763366	0.691319792	0.335382421	1.369897285	5.47506056	5.455173885	0.049826833	-0.534288607089463	FAUX	-0.281697863058915	FAUX	0.346811463549851	FAUX	0.401158561946549	FAUX	0.96281290804111	FAUX	-0.171471900288928	FAUX	-0.12869909565578	FAUX	-0.519720882013335	FAUX	-0.345810901634383	FAUX	0.372556568436431	FAUX
1Q2D2	hi.sham	1	14758	5.420420469	5.418438022	0.004745149	4.92338549	4.925523514	0.020661453	0.908264215	0.906494725	0.000501751	9713	5.428614334	5.428818108	0.004492366	4.857216462	4.877952703	0.053300814	0.894690106	0.89690183	0.001598937	0.156388346	0.673015546	0.361129346	1.24391904	5.485551875	5.464209267	0.048904927	0.251154307492681	FAUX	-0.016556363849596	FAUX	-1.28384320340629	FAUX	-1.37604836214049	FAUX	-0.852983072942259	FAUX	0.648776011074109	FAUX	0.401023812922974	FAUX	0.330867357378634	FAUX	0.163910525703231	FAUX	-1.28854538071849	FAUX
1Q2D3	hi.sham	1	15970	5.422146961	5.41952289	0.004623341	4.921830432	4.920837862	0.017805199	0.907686008	0.905658668	0.000402374	10322	5.42905168	5.430901068	0.004433866	4.858205525	4.874023508	0.058158946	0.89479125	0.896577136	0.001749686	0.151327262	0.659949622	0.360992331	1.307419431	5.490650454	5.469027782	0.04882669	0.276883006420509	FAUX	-0.102597776478555	FAUX	-0.947085627115847	FAUX	-0.980183260705903	FAUX	0.0622841207598959	FAUX	1.07476546432132	FAUX	0.683521861243492	FAUX	0.372910517401013	FAUX	-0.00537540111194847	FAUX	-0.924429944971646	FAUX
1Q2D6	hi.EMS	1	16501	5.418884279	5.41522049	0.004689246	4.915140459	4.915431496	0.0180459	0.906993131	0.905168151	0.000401133	8823	5.426455107	5.426494995	0.004496531	4.857183496	4.876186076	0.06232579	0.895045925	0.896756717	0.001912785	0.162076391	0.682534285	0.323894014	1.205863136	5.478628374	5.458527562	0.045710381	0.341666447845017	FAUX	-0.0550101927186953	FAUX	-0.582739436193222	FAUX	-0.570651355976248	FAUX	-1.40150442705295	FAUX	0.173672486905857	FAUX	0.0679189925306346	FAUX	0.329466036316882	FAUX	0.0877969479775806	FAUX	-0.612126323178517	FAUX
1Q2D7	lo.sham	1	17147	5.418139266	5.414741105	0.004621961	4.913914449	4.912179525	0.018669648	0.90689689	0.904929359	0.000433709	11229	5.425774982	5.42640064	0.004407445	4.825738706	4.849019949	0.065772751	0.889343771	0.892169099	0.002013503	0.163238044	0.704158874	0.344744286	1.331762079	5.471098117	5.451284328	0.047023775	-1.10882990889419	FAUX	-1.27069367723651	FAUX	-0.357745906758063	FAUX	-0.326439046908821	FAUX	0.41314852917337	FAUX	0.154375796205562	FAUX	-0.356734550838828	FAUX	-1.00719132306336	FAUX	-1.08263185160436	FAUX	-0.353777701420738	FAUX
1Q2D8	lo.sham	1	16741	5.414897294	5.411299758	0.004560104	4.903508575	4.898708731	0.018584544	0.905517988	0.903923943	0.000432375	10844	5.41856919	5.416109378	0.00445057	4.820215267	4.8368619	0.057355794	0.889521546	0.89164918	0.001746709	0.202877167	0.735706381	0.343346947	1.23257687	5.448397795	5.427479617	0.051074471	-1.0636080524134	FAUX	-1.40846821330009	FAUX	-0.953735935274553	FAUX	-0.98783190440343	FAUX	-1.01646420971814	FAUX	-1.95030651771485	FAUX	-1.7523480123168	FAUX	-1.24198205909429	FAUX	-1.60645074917222	FAUX	-0.984625929858624	FAUX
1Q2D9	lo.sham	1	15292	5.419020855	5.416217655	0.004588778	4.911135253	4.908401902	0.017825906	0.906235167	0.90410809	0.0004039	9301	5.42532988	5.42483102	0.004351552	4.821123656	4.844514429	0.070845106	0.888563904	0.891849278	0.00218745	0.163745834	0.682399742	0.334955514	1.351512153	5.480888531	5.454381365	0.053807182	-1.30721007229229	FAUX	-1.35544378234594	FAUX	0.0308335871224511	FAUX	0.0813654101555157	FAUX	0.697817560666262	FAUX	-0.166629679466437	FAUX	-0.175162654087161	FAUX	-1.20336819517501	FAUX	-1.27674823650869	FAUX	0.0263936794902081	FAUX
1Q2E1	hi.sham	1	14840	5.419289917	5.416958208	0.004748856	4.937345826	4.937648261	0.023046753	0.911027969	0.909296018	0.000576633	9311	5.425565863	5.424657901	0.004459343	4.858843965	4.882678193	0.072316064	0.895481161	0.898494996	0.002232087	0.161851573	0.673397057	0.328756733	1.323904406	5.48022545	5.459051553	0.052223337	0.452380439842018	FAUX	0.405620372377204	FAUX	0.130547999376439	FAUX	0.183371934683196	FAUX	0.299891426303891	FAUX	-0.202034520729265	FAUX	0.098639335797682	FAUX	0.400049370117892	FAUX	0.367504125487871	FAUX	0.136641509959882	FAUX
1Q2E12	lo.EMS	1	17182	5.418235001	5.414860584	0.004629066	4.9348474	4.931994051	0.016833711	0.910745139	0.908483673	0.000370897	10073	5.431988937	5.434167955	0.004391411	4.862822057	4.896939372	0.088526589	0.895134193	0.90029723	0.002748139	0.125186141	0.638340117	0.326628888	1.466524889	5.504729611	5.482188744	0.047595487	0.3641197895851	FAUX	0.883198520565725	FAUX	1.28335445752764	FAUX	1.2957950072149	FAUX	2.35556143375086	FAUX	1.74288170608814	FAUX	1.45511769087571	FAUX	0.56915038647358	FAUX	0.981934537949433	FAUX	1.35161516116162	FAUX
1Q2E2	hi.sham	1	15473	5.420697523	5.418057554	0.00474263	4.940390527	4.938614779	0.023377537	0.911353761	0.908782993	0.000589023	10983	5.425647639	5.426107684	0.004547692	4.861320305	4.877158178	0.056626397	0.895927896	0.897513427	0.001699184	0.159428207	0.673950651	0.365886726	1.291102166	5.482591533	5.460676882	0.052435739	0.566019512011576	FAUX	0.145512137076299	FAUX	-1.05990183895022	FAUX	-1.11082970907595	FAUX	-0.172905885321239	FAUX	0.094462900007127	FAUX	0.193928500691548	FAUX	0.505313806144556	FAUX	0.129679111634244	FAUX	-1.03929400114352	FAUX
1Q2E6	hi.EMS	1	17394	5.417912842	5.415445804	0.004592476	4.922848142	4.922024418	0.021173952	0.908582315	0.906842825	0.000517338	11455	5.419370879	5.416668793	0.004669314	4.886375415	4.903903527	0.060452131	0.901593065	0.903877889	0.001838974	0.193452641	0.723876037	0.350066981	1.25959346	5.456494509	5.433087864	0.045585582	2.00710773846282	FAUX	1.83204561506881	FAUX	-0.747625528064968	FAUX	-0.753731160189105	FAUX	-0.62705875688082	FAUX	-1.83589966881304	FAUX	-1.42354985935905	FAUX	1.57035819574238	FAUX	1.28197905945049	FAUX	-0.752556464480973	FAUX
1Q2E7	lo.sham	1	14303	5.421451668	5.418958037	0.004573338	4.938492598	4.938564753	0.019258621	0.910879089	0.9084002	0.00045898	9534	5.424931424	5.424540271	0.004477746	4.850358857	4.867868009	0.062967209	0.894051445	0.896125526	0.00195052	0.176735893	0.687014894	0.30014163	1.125521353	5.473449998	5.45110607	0.052060666	0.0886936910850242	FAUX	-0.222270952938133	FAUX	-0.498443373590353	FAUX	-0.478418461659288	FAUX	-2.55951616690882	FAUX	-0.226091218594566	FAUX	-0.367185392456531	FAUX	0.0393637985705356	FAUX	-0.270579686779792	FAUX	-0.56405217478541	FAUX
1Q2F1	hi.sham	1	12782	5.422779043	5.421200701	0.00478834	4.945013133	4.944127195	0.018304392	0.911858161	0.90949778	0.000418429	7626	5.431996026	5.436038545	0.00439393	4.894704719	4.915769066	0.067169415	0.901024734	0.903638749	0.002059813	0.143456596	0.619590873	0.338425877	1.323191719	5.510010325	5.485592961	0.054101152	1.86253745065195	FAUX	1.76867535440464	FAUX	-0.25429418662718	FAUX	-0.216203020978077	FAUX	0.289619063878941	FAUX	2.12543903380898	FAUX	1.65469881878741	FAUX	1.92442083982795	FAUX	1.79319541974223	FAUX	-0.249098182430328	FAUX
1Q2F11	lo.EMS	1	17463	5.418026096	5.415089422	0.00455711	4.923036661	4.918599058	0.018773366	0.90859235	0.9064499	0.000425724	9397	5.428320766	5.428351077	0.004336333	4.834195884	4.855191946	0.069655333	0.890472857	0.892485536	0.002122949	0.141747366	0.701926147	0.354317649	1.420066457	5.474955435	5.45775174	0.042262971	-0.821616492798222	FAUX	-1.18684030609915	FAUX	-0.113254933718881	FAUX	-0.0678919203201707	FAUX	1.68592967226388	FAUX	0.553262760536768	FAUX	0.0224343980353911	FAUX	-0.647693001933276	FAUX	-0.816716764049431	FAUX	-0.0627794253852513	FAUX
1Q2F3	hi.sham	1	14813	5.423930938	5.423299953	0.004568062	4.937936015	4.93874982	0.021023363	0.910358472	0.908031031	0.000518956	9977	5.432642448	5.434382042	0.004425411	4.856406194	4.883613177	0.0755813	0.893862491	0.897060816	0.00233598	0.14753934	0.644281848	0.325891478	1.346800815	5.495924399	5.477734624	0.052847979	0.0406281550452672	FAUX	0.0255737033158725	FAUX	0.362634148362787	FAUX	0.416913368317404	FAUX	0.629910370774432	FAUX	1.78666497800755	FAUX	1.19398325277904	FAUX	0.296424427873592	FAUX	0.407787092608947	FAUX	0.381369901233784	FAUX
1Q2F5	hi.EMS	1	14638	5.423939813	5.423933645	0.004610551	4.934619633	4.935149405	0.021247141	0.909744113	0.908111156	0.00052079	7884	5.432208112	5.434940769	0.004489278	4.84712743	4.906429317	0.128721974	0.892213248	0.902282981	0.00413318	0.119989853	0.627346525	0.265787777	1.423223553	5.511865844	5.485998803	0.047290616	-0.378901195245456	FAUX	1.40940726224056	FAUX	4.37739189872387	VRAI	3.84541835389258	VRAI	1.73143468964508	FAUX	1.90093112293797	FAUX	1.67849236782203	FAUX	-0.097997929106778	FAUX	1.3908005104323	FAUX	4.3642463791456	VRAI
1Q2F6	hi.EMS	1	15215	5.422330326	5.42148958	0.00462585	4.933064708	4.932833836	0.019643059	0.909729271	0.907771475	0.000469113	9033	5.428901814	5.430405652	0.00445056	4.881263482	4.899289615	0.06403192	0.899051632	0.901165057	0.001929989	0.14092771	0.655042621	0.365743768	1.387291997	5.49524303	5.470995233	0.047506912	1.36062584628721	FAUX	1.11316600070874	FAUX	-0.544307490757426	FAUX	-0.528489094066586	FAUX	1.21353276955341	FAUX	0.973447152414334	FAUX	0.79886882346445	FAUX	1.35305978589105	FAUX	1.08319270011643	FAUX	-0.484252426711571	FAUX
1Q2G10	lo.EMS	1	15327	5.420887924	5.418798291	0.004564035	4.937954224	4.936679587	0.019391353	0.910875872	0.90917273	0.000465665	10117	5.42512916	5.424721604	0.004550169	4.862755054	4.895436359	0.091014527	0.896291478	0.901271157	0.002890713	0.164673322	0.692102402	0.268892981	1.202599554	5.474583663	5.453411612	0.046074761	0.658506380373235	FAUX	1.14128168464479	FAUX	1.60184993465872	FAUX	1.58426158423416	FAUX	-1.44854428761943	FAUX	-0.189006519164012	FAUX	-0.232016960829564	FAUX	0.566302218206267	FAUX	0.917178538636508	FAUX	1.53808531655903	FAUX
1Q2G11	lo.EMS	1	17461	5.419458837	5.417953053	0.00469296	4.929461044	4.92714443	0.019262672	0.909543063	0.907266004	0.000447362	11677	5.427860123	5.427855978	0.00428854	4.848907527	4.869982283	0.063787501	0.893278716	0.895684659	0.001954734	0.140532671	0.703091547	0.335106239	1.292395895	5.473097713	5.456505714	0.043835794	-0.107870729877082	FAUX	-0.339097317027032	FAUX	-0.489029736176586	FAUX	-0.468174079925282	FAUX	-0.154258634609961	FAUX	0.452009278802466	FAUX	-0.0506171361315639	FAUX	-0.0223294398129751	FAUX	-0.17948804240198	FAUX	-0.502571552393996	FAUX
1Q2G12	lo.EMS	1	13777	5.4210266	5.419316221	0.004664662	4.93553241	4.934316615	0.019878089	0.910398916	0.907931444	0.000467081	8441	5.421501964	5.419772414	0.00451178	4.858578751	4.884427162	0.07874987	0.896107844	0.900057772	0.002461041	0.172965288	0.685819216	0.308819978	1.290198023	5.475826259	5.449453714	0.046122176	0.611794129533741	FAUX	0.819743992347473	FAUX	0.642007406218289	FAUX	0.691253154292072	FAUX	-0.185937811791035	FAUX	-1.20117321565204	FAUX	-0.464059085934857	FAUX	0.388775634630664	FAUX	0.442856923741938	FAUX	0.618853206801513	FAUX
1Q2G4	hi.EMS	1	13985	5.421587509	5.420101039	0.004667142	4.940410336	4.938269483	0.020378645	0.911213321	0.909243045	0.000499913	9340	5.426209335	5.427404955	0.004613894	4.861319737	4.883229765	0.071039159	0.89582831	0.898877911	0.00217573	0.150321199	0.656852248	0.338498103	1.328224104	5.491796706	5.467605146	0.050230751	0.540687132320973	FAUX	0.507089902201638	FAUX	0.00465232692089718	FAUX	0.0544102299240545	FAUX	0.362153686485892	FAUX	0.359769849734238	FAUX	0.600116103770391	FAUX	0.505289661560349	FAUX	0.391268122241734	FAUX	0.0409378896213822	FAUX
1Q2G6	hi.EMS	1	16953	5.419242957	5.417523174	0.004566983	4.933222752	4.931010123	0.018922833	0.910271964	0.90794222	0.000436597	8622	5.436954343	5.439730483	0.004294055	4.889570204	4.920326854	0.086233181	0.899237254	0.903613047	0.002676075	0.125956855	0.644050104	0.329583876	1.476962187	5.504020413	5.484638598	0.050282523	1.40784379843837	FAUX	1.76186452209057	FAUX	1.12237098183099	FAUX	1.14714143803729	FAUX	2.50600013656599	FAUX	2.88048312973144	VRAI	1.5987467910591	FAUX	1.70616251272199	FAUX	1.98956372566926	FAUX	1.17972496689245	FAUX
1Q2G8	lo.sham	1	14879	5.420691773	5.418068332	0.004611519	4.944482637	4.943583542	0.02126092	0.912109054	0.909903192	0.000519694	11022	5.427649409	5.426522647	0.0045517	4.855264196	4.879164719	0.071728116	0.894485888	0.897181591	0.002222283	0.159408456	0.677372528	0.318030405	1.262485856	5.478875432	5.462656251	0.050901767	0.199205962186572	FAUX	0.0575781493797319	FAUX	0.108646883760737	FAUX	0.161055427508394	FAUX	-0.585369010907517	FAUX	0.179327641282891	FAUX	0.309974186843053	FAUX	0.247880296044537	FAUX	0.216129174020466	FAUX	0.0925749958724745	FAUX
1Q2G9	lo.sham	1	16840	5.423808947	5.423352386	0.004675905	4.941255124	4.94225615	0.022737361	0.910987942	0.909138025	0.000567301	10691	5.425362781	5.425069355	0.004616286	4.85105985	4.883249653	0.083614591	0.894083365	0.898405001	0.00261792	0.153961276	0.686558788	0.30207789	1.285622928	5.475120064	5.456484461	0.045593756	0.0968134022866266	FAUX	0.381772389570166	FAUX	0.99245876450835	FAUX	1.02571377145951	FAUX	-0.251881253959302	FAUX	-0.117887410608877	FAUX	-0.0518631488597955	FAUX	0.0691616586397179	FAUX	0.392124979311046	FAUX	0.983462485985734	FAUX
1Q2H1	hi.sham	1	13365	5.423222208	5.420251232	0.00465237	4.947322945	4.944472802	0.018231121	0.912208585	0.909638854	0.000416928	8503	5.429821652	5.432217038	0.004628609	4.877309612	4.907808921	0.079195114	0.898183598	0.902246736	0.002471106	0.145948489	0.627425614	0.311433163	1.288216383	5.501979035	5.483017848	0.051239732	1.13981803321766	FAUX	1.39980261601754	FAUX	0.664491568669537	FAUX	0.713025829840563	FAUX	-0.214500314370398	FAUX	1.34389657619569	FAUX	1.50372608202002	FAUX	1.18498840002612	FAUX	1.45023954101692	FAUX	0.652224101843818	FAUX
1Q2H11	lo.EMS	1	16600	5.418127057	5.415050178	0.004669708	4.92585402	4.922868124	0.020385094	0.909097932	0.906794198	0.00048237	9763	5.418922402	5.418119745	0.004457059	4.810750884	4.852522688	0.110732682	0.887698628	0.894682308	0.003548584	0.177711769	0.705418416	0.270902159	1.350287239	5.462907463	5.440764293	0.04765237	-1.52731631382379	FAUX	-0.604712622484006	FAUX	3.07146527852017	VRAI	2.83137564473971	VRAI	0.680162179626065	FAUX	-1.53916317403259	FAUX	-0.973499125767698	FAUX	-1.64429472166711	FAUX	-0.93171940821415	FAUX	3.01595471161637	VRAI
1Q2H4	hi.EMS	1	15750	5.419438888	5.416275112	0.004637102	4.931138135	4.930447241	0.02139981	0.909860802	0.907634714	0.00053259	10055	5.42640831	5.426759242	0.004508859	4.847788029	4.879881144	0.080456875	0.893300307	0.897434144	0.002504442	0.148582795	0.673296867	0.318426281	1.345108048	5.486839954	5.462775221	0.048206958	-0.102378477854717	FAUX	0.124502751878344	FAUX	0.738960723113137	FAUX	0.784823651143476	FAUX	0.60551155877843	FAUX	0.227714059980916	FAUX	0.316949114348451	FAUX	-0.0699171400491941	FAUX	0.246995717961004	FAUX	0.746792684237908	FAUX
1Q2H5	hi.EMS	1	16012	5.416791714	5.412984408	0.004662256	4.924552967	4.91858858	0.020054797	0.909077918	0.906729724	0.00046152	10435	5.424125901	5.422304975	0.004398248	4.838017713	4.875622588	0.098800143	0.891869695	0.896917866	0.003122604	0.163584092	0.704072832	0.293506867	1.391096318	5.464405531	5.448965892	0.049372399	-0.466293148329645	FAUX	-0.0123069471898558	FAUX	2.11987029382241	FAUX	2.03864599233122	FAUX	1.26836660838146	FAUX	-0.683235148811847	FAUX	-0.492658926949695	FAUX	-0.485234424243825	FAUX	0.0635195607954146	FAUX	2.12161473947252	FAUX
1Q2H7	lo.sham	1	14021	5.422933779	5.422196565	0.004740081	4.939573325	4.93961658	0.020757607	0.910827598	0.908735781	0.000499973	9607	5.431510383	5.433158352	0.004505354	4.874855465	4.893145659	0.062812992	0.897454854	0.899065426	0.001912555	0.146039346	0.643489123	0.343508899	1.282620832	5.496530877	5.477218236	0.049580964	0.954442380964922	FAUX	0.556779934937418	FAUX	-0.583253232255198	FAUX	-0.571216304160206	FAUX	-0.295152168324922	FAUX	1.53640619529258	FAUX	1.16370865527831	FAUX	1.08066734561453	FAUX	0.818485734498402	FAUX	-0.575610689489121	FAUX
1Q2H8	lo.sham	1	13916	5.420804292	5.417981254	0.004727311	4.937840712	4.934988019	0.020237941	0.910872223	0.908799006	0.000495341	9058	5.426003581	5.427624847	0.00457466	4.858769077	4.889483785	0.090876604	0.895395169	0.900309505	0.002865412	0.167255465	0.673769044	0.29456064	1.312868822	5.481865226	5.461144975	0.048971994	0.430506059965816	FAUX	0.88645130115305	FAUX	1.54533013394545	FAUX	1.5335987561941	FAUX	0.140829287638565	FAUX	0.404740311410539	FAUX	0.221371677465423	FAUX	0.396866025712358	FAUX	0.660717098945757	FAUX	1.52774803193101	FAUX
1Q2H9	lo.sham	1	16094	5.4219656	5.420872084	0.004651492	4.939630843	4.93600073	0.020454764	0.911005629	0.908991677	0.000501026	11374	5.42715794	5.427146785	0.004588635	4.849009962	4.887082542	0.091880954	0.893415759	0.898992088	0.002909155	0.161420784	0.686038333	0.279331274	1.249943955	5.472739402	5.459371375	0.047268078	-0.0730101539935313	FAUX	0.537345929013747	FAUX	1.6430474432455	FAUX	1.62105035809421	FAUX	-0.766142551844617	FAUX	0.306971093567535	FAUX	0.117389737282352	FAUX	-0.0179751255813075	FAUX	0.557261646425968	FAUX	1.60302374240827	FAUX
1Q3A10	lo.EMS	1	19574	5.419164435	5.417597894	0.004609924	4.89216866	4.89187183	0.01945474	0.902714986	0.901043723	0.000466014	11631	5.422572449	5.419567516	0.004501414	4.815549481	4.846643237	0.079728057	0.887996373	0.892769902	0.002497238	0.168945061	0.715931562	0.303659042	1.277960158	5.461326957	5.444549097	0.044960101	-1.45157685856928	FAUX	-1.111485503289	FAUX	0.722867736893684	FAUX	0.769348615180724	FAUX	-0.362329109215581	FAUX	-1.24307723060737	FAUX	-0.751605089269783	FAUX	-1.44031562068569	FAUX	-1.18503040746443	FAUX	0.692168008817369	FAUX
1Q3A3	hi.sham	1	13024	5.421909944	5.421566089	0.004719667	4.904686715	4.904672276	0.020428095	0.904571121	0.903032418	0.000504019	8057	5.426907319	5.426080005	0.004538691	4.870224518	4.888895237	0.055107926	0.897376254	0.899040506	0.001673058	0.162715651	0.647015018	0.342168465	1.192289431	5.491489809	5.469185566	0.049786574	0.934448355261695	FAUX	0.550176326608616	FAUX	-1.11826460379884	FAUX	-1.17917878007672	FAUX	-1.59714994494419	FAUX	0.0888022238173582	FAUX	0.692772361046053	FAUX	0.883814722701458	FAUX	0.635360023602004	FAUX	-1.1531029157292	FAUX
1Q3A7	lo.sham	1	15665	5.41896878	5.416875063	0.004647574	4.893772914	4.892545367	0.018432213	0.903040372	0.901150687	0.000423971	9819	5.420067475	5.417933145	0.004460039	4.829836454	4.854900891	0.071892214	0.891034706	0.894245004	0.002215659	0.181994093	0.714431205	0.333411976	1.338606073	5.463837041	5.4369875	0.047770752	-0.678695076165567	FAUX	-0.720594818977626	FAUX	0.0938495571758318	FAUX	0.145949568208109	FAUX	0.511794901005859	FAUX	-1.57732503598672	FAUX	-1.19492349643181	FAUX	-0.833003960988912	FAUX	-0.829256613924323	FAUX	0.104874088358061	FAUX
1Q3A8	lo.sham	1	17530	5.417374695	5.413314017	0.004641948	4.891997077	4.890887481	0.018591708	0.902979474	0.901168197	0.000432581	11331	5.423418093	5.423004897	0.004537932	4.838135737	4.860864831	0.063091205	0.892018532	0.895261602	0.001917742	0.173329803	0.720589533	0.350340269	1.306307718	5.460573978	5.443162814	0.044220266	-0.428432451082953	FAUX	-0.451204168100868	FAUX	-0.571666014109681	FAUX	-0.558483738514418	FAUX	0.0462603700130349	FAUX	-0.540092990491166	FAUX	-0.83287955700933	FAUX	-0.4802174516966	FAUX	-0.572305480073748	FAUX	-0.554758714342	FAUX
1Q3A9	lo.sham	1	19937	5.417933466	5.415333997	0.004636087	4.895104631	4.892937318	0.018720718	0.90346549	0.901570848	0.000447481	13694	5.421139468	5.41987813	0.004461766	4.812571975	4.854633917	0.094216603	0.887660866	0.8939206	0.002962456	0.201621148	0.752738426	0.309046825	1.420151297	5.432806053	5.427724613	0.048526021	-1.53692209497651	FAUX	-0.806559383837105	FAUX	1.76211632976453	FAUX	1.72672651100181	FAUX	1.68715251935964	FAUX	-1.17955306882274	FAUX	-1.73798448084577	FAUX	-1.56688365651924	FAUX	-0.840758954995583	FAUX	1.7780798860838	FAUX
1Q3B10	lo.EMS	1	17497	5.418438205	5.415627637	0.004631965	4.891394659	4.888909259	0.018623168	0.902688735	0.901053572	0.000429118	11111	5.425954889	5.4264527	0.004457616	4.80708401	4.83795125	0.079748052	0.885884186	0.89031914	0.002495429	0.158491585	0.690216902	0.300623161	1.271543317	5.470322057	5.455797738	0.048570982	-1.98886847648278	FAUX	-1.7609185833501	FAUX	0.718826619171447	FAUX	0.765459166233722	FAUX	-0.454818682303453	FAUX	0.165022669374496	FAUX	-0.092124081374612	FAUX	-1.80016646124688	FAUX	-1.55951705807872	FAUX	0.693666627656411	FAUX
1Q3B11	lo.EMS	1	17799	5.42184114	5.419788934	0.004590521	4.905436989	4.905493657	0.020284863	0.904719544	0.902621986	0.000499704	13567	5.425215464	5.424969793	0.004585606	4.802351889	4.823539434	0.059546969	0.885126888	0.888446966	0.001798921	0.152502396	0.6699344	0.359465817	1.295355751	5.484831819	5.462926318	0.043716754	-2.18150760723336	FAUX	-2.25703029359792	FAUX	-0.837099761414185	FAUX	-0.854617497012297	FAUX	-0.111596549350007	FAUX	-0.138248993137669	FAUX	0.325807571281144	FAUX	-2.0013197957143	FAUX	-2.18043753381219	FAUX	-0.820398066160689	FAUX
1Q3B12	lo.EMS	1	15687	5.41778984	5.414061208	0.004716695	4.906626659	4.903437284	0.02043322	0.90560752	0.90391791	0.000487817	9642	5.425082419	5.424249327	0.004492948	4.826556695	4.855700831	0.077146168	0.889616524	0.893789527	0.002409814	0.164696121	0.692491184	0.306045809	1.26817128	5.471299257	5.45361414	0.047951029	-1.03944784155792	FAUX	-0.841292720694296	FAUX	0.527571619840731	FAUX	0.579742046868961	FAUX	-0.503421766370286	FAUX	-0.285592637481819	FAUX	-0.220143226965448	FAUX	-0.972420188743756	FAUX	-0.794791899320806	FAUX	0.498656256093282	FAUX
1Q3B4	hi.EMS	1	15045	5.419587459	5.416605563	0.004747786	4.895499944	4.894891786	0.021355594	0.903259372	0.901904664	0.00052722	10135	5.426857267	5.426547854	0.004695781	4.827227795	4.843095674	0.054675967	0.889438539	0.890966311	0.001620087	0.154810064	0.649333991	0.386455348	1.318692831	5.490019561	5.471146433	0.050170227	-1.08472311719134	FAUX	-1.58942324604022	FAUX	-1.23659630466373	FAUX	-1.31941577400891	FAUX	0.224774036475246	FAUX	0.184482764832112	FAUX	0.807733319041648	FAUX	-0.943893022434807	FAUX	-1.33787405365411	FAUX	-1.18547810428105	FAUX
1Q3B6	hi.EMS	1	18637	5.420592116	5.418452108	0.004599872	4.895869204	4.894149847	0.020315012	0.903160094	0.901431144	0.000496219	11413	5.432728326	5.435283624	0.004421432	4.849714439	4.877008322	0.078078677	0.892609522	0.896190312	0.002406139	0.116533777	0.65583107	0.331849662	1.394524388	5.498028397	5.478419301	0.043589	-0.278098236701996	FAUX	-0.205103161237077	FAUX	0.519362052328724	FAUX	0.571696935569939	FAUX	1.31777732789522	FAUX	1.97104894276805	FAUX	1.23412423319103	FAUX	0.0119708326064999	FAUX	0.123222697063615	FAUX	0.568547506654784	FAUX
1Q3B7	lo.sham	1	18364	5.417001407	5.41276621	0.004692897	4.886705741	4.887048745	0.021497971	0.902062896	0.900509404	0.00052716	12986	5.420848954	5.419188037	0.004545364	4.827951893	4.842796395	0.053294023	0.890565604	0.892489497	0.001589803	0.184275373	0.736562452	0.3752132	1.284792608	5.452662622	5.43348581	0.044674744	-0.798023796845357	FAUX	-1.18579067156503	FAUX	-1.3042476087545	FAUX	-1.40062190073361	FAUX	-0.263849127610265	FAUX	-1.32068508276435	FAUX	-1.40021923398238	FAUX	-0.913113013389983	FAUX	-1.35076822736942	FAUX	-1.2890543639911	FAUX
1Q3B8	lo.sham	1	17192	5.420163305	5.418943969	0.004670537	4.898810383	4.896708054	0.018196041	0.903775411	0.901848595	0.000424049	12191	5.425812973	5.424589287	0.004599172	4.833475285	4.859600575	0.065665143	0.890768505	0.894476944	0.002007911	0.162825035	0.682388647	0.339001628	1.280941851	5.477433111	5.4570746	0.046410213	-0.746410465939375	FAUX	-0.659132502934942	FAUX	-0.370237852751842	FAUX	-0.339835618723012	FAUX	-0.31935227487465	FAUX	-0.216066878693444	FAUX	-0.0172647060329046	FAUX	-0.678324275238398	FAUX	-0.626774843058175	FAUX	-0.361842886518601	FAUX
1Q3C1	hi.sham	1	23086	5.4239544	5.423765078	0.004591459	4.925826994	4.925940899	0.019727985	0.908115356	0.906573345	0.000460144	10436	5.43012705	5.430097637	0.004511726	4.858157588	4.882154398	0.079835647	0.894602168	0.898160491	0.00248263	0.156094289	0.684266002	0.313710215	1.319640784	5.472894894	5.462604613	0.042942679	0.228784910135321	FAUX	0.316979120209142	FAUX	0.690234985270451	FAUX	0.737900247146274	FAUX	0.238437421352224	FAUX	0.910454516241826	FAUX	0.306946773995051	FAUX	0.370872808011437	FAUX	0.344936876462002	FAUX	0.700231844821001	FAUX
1Q3C12	lo.EMS	1	13830	5.419289821	5.417347116	0.004692059	4.922175115	4.923516015	0.024171307	0.908224669	0.906687605	0.000611685	8984	5.425006995	5.422703076	0.0046487	4.850131062	4.877377106	0.072384129	0.893974697	0.89776819	0.002239185	0.180988424	0.676424755	0.318637133	1.257338739	5.470588733	5.45696998	0.054159242	0.0691707714327241	FAUX	0.213022372576755	FAUX	0.146404192628199	FAUX	0.199498296085134	FAUX	-0.659557330980173	FAUX	-0.60181888189977	FAUX	-0.0233983272451085	FAUX	0.0296806725843304	FAUX	0.139111432856721	FAUX	0.141742959886337	FAUX
1Q3C7	lo.sham	1	12522	5.424121744	5.424373574	0.004787411	4.910549405	4.914850683	0.027578288	0.905278903	0.903866605	0.000740984	8689	5.428817919	5.429313728	0.00448659	4.851078062	4.870687684	0.058228827	0.893530946	0.895003532	0.001775277	0.155829209	0.630682472	0.335744685	1.209539214	5.499779772	5.47759004	0.051601327	-0.0437092400154554	FAUX	-0.519590733165681	FAUX	-0.889917996585305	FAUX	-0.914700250054944	FAUX	-1.34851902740572	FAUX	0.750136043344832	FAUX	1.18550663751098	FAUX	0.069935815624978	FAUX	-0.149096457850593	FAUX	-0.919192386427452	FAUX
1Q3C8	lo.sham	1	16599	5.418422344	5.416367532	0.004762546	4.9028306	4.899256757	0.020536212	0.904798887	0.902535864	0.000485409	11541	5.421829805	5.420274334	0.00456851	4.820371582	4.842961649	0.06796633	0.888996479	0.891272189	0.002081711	0.190018196	0.706264622	0.348615902	1.344642436	5.451418069	5.441572605	0.051725926	-1.19717297727232	FAUX	-1.50836792868873	FAUX	-0.205376333735234	FAUX	-0.164508837550876	FAUX	0.598800428628161	FAUX	-1.09852476038932	FAUX	-0.92610972002047	FAUX	-1.23533741000834	FAUX	-1.34364840344874	FAUX	-0.189369658693592	FAUX
1Q3D1	hi.sham	1	18244	5.416853874	5.412248809	0.004616983	4.91671202	4.916301261	0.020882678	0.907627105	0.905738605	0.000506467	11816	5.421237874	5.419779022	0.004514688	4.839453551	4.864333055	0.073253796	0.892621786	0.89620922	0.002268619	0.187542316	0.72063304	0.322645053	1.299649438	5.45785947	5.437947853	0.04736929	-0.274978558187696	FAUX	-0.2000926866672	FAUX	0.212156685185582	FAUX	0.266099930873007	FAUX	-0.0497092004811546	FAUX	-1.19982180309142	FAUX	-1.13862028928215	FAUX	-0.424199720893041	FAUX	-0.422880085242827	FAUX	0.206924222696743	FAUX
1Q3D10	lo.EMS	1	14878	5.422098255	5.421358745	0.004690003	4.916567605	4.918318722	0.023555584	0.906719486	0.905379382	0.000591468	11252	5.425871569	5.425916342	0.004612622	4.838482386	4.856487213	0.056649257	0.891691003	0.893385484	0.001713042	0.15792748	0.675879844	0.348958441	1.222916731	5.480302167	5.460783619	0.04652108	-0.511748268443625	FAUX	-0.948361008013579	FAUX	-1.02894450926821	FAUX	-1.07478858230495	FAUX	-1.15570127856237	FAUX	0.0553312441120573	FAUX	0.200186236567367	FAUX	-0.465482071464399	FAUX	-0.760911319278125	FAUX	-1.03758065147308	FAUX
1Q3D11	lo.EMS	1	20235	5.421163657	5.418503473	0.004609289	4.922158278	4.921228535	0.017477785	0.907910528	0.906071585	0.000391294	11879	5.428957533	5.429756316	0.00444783	4.808384502	4.838064759	0.071608704	0.885651583	0.889899642	0.002247717	0.125768162	0.678845021	0.287550621	1.153780332	5.486465312	5.466848351	0.040294329	-2.04803731058767	FAUX	-1.87208232679783	FAUX	0.165463792631583	FAUX	0.21884885674089	FAUX	-2.15220345593325	FAUX	0.840650417184714	FAUX	0.555747016929585	FAUX	-1.74488505524558	FAUX	-1.55462662218361	FAUX	0.0836251047593056	FAUX
1Q3D12	lo.EMS	1	15823	5.419198259	5.416422473	0.004542688	4.92247049	4.919682021	0.019003627	0.908294464	0.906404606	0.000438828	10405	5.423391619	5.422711281	0.004461875	4.843105036	4.865778887	0.064016482	0.892935579	0.89596058	0.00194527	0.153772225	0.702450745	0.353301279	1.338235132	5.474558567	5.449765263	0.047052406	-0.195156862163655	FAUX	-0.26598037426249	FAUX	-0.510171327178933	FAUX	-0.491196889778657	FAUX	0.506448317736805	FAUX	-0.600140864336471	FAUX	-0.445793710719417	FAUX	-0.268982138014725	FAUX	-0.360587679256613	FAUX	-0.485409499861716	FAUX
1Q3D3	hi.sham	1	12629	5.420258898	5.417275676	0.004770455	4.920733957	4.921434145	0.025683113	0.907798985	0.905795696	0.000669299	9077	5.427124103	5.427296185	0.004566051	4.868142748	4.871928864	0.043295195	0.896963969	0.896693662	0.001283029	0.175608681	0.66156219	0.371493012	1.143931786	5.487392805	5.464168999	0.05496606	0.829572567894634	FAUX	-0.0717192827336684	FAUX	-1.98954879621792	FAUX	-2.27138682908925	FAUX	-2.29415614185398	FAUX	0.337525124521275	FAUX	0.398662996071759	FAUX	0.795322696167457	FAUX	-0.0956213041245874	FAUX	-2.03846331668685	FAUX
1Q3D4	hi.EMS	1	18002	5.422982812	5.422006778	0.004561922	4.915564269	4.917095703	0.022083704	0.906393067	0.904967814	0.000554001	11186	5.430691757	5.433767434	0.004619363	4.911832903	4.927534604	0.054576848	0.90439571	0.906114066	0.001615584	0.141158591	0.654836403	0.378803326	1.302047867	5.494793867	5.476123403	0.043621778	2.72003593397161	VRAI	2.42461532060196	FAUX	-1.24665553799884	FAUX	-1.33144217486636	FAUX	-0.0151392813742983	FAUX	1.66097052113778	FAUX	1.09952120629521	FAUX	2.65250689784959	VRAI	2.30010332449344	FAUX	-1.19290704155072	FAUX
1Q3D6	hi.EMS	1	18504	5.42131767	5.420259483	0.004654665	4.910786753	4.911200237	0.019265587	0.905784385	0.904003248	0.000444988	11285	5.428404951	5.427724613	0.004579888	4.873642224	4.891080065	0.051449438	0.897767648	0.899942493	0.001562884	0.132476739	0.658750554	0.337020474	1.129585616	5.494096954	5.472576553	0.04548951	1.03400995444852	FAUX	0.789195944011317	FAUX	-1.36438185306897	FAUX	-1.4734565870156	FAUX	-2.50093563642866	FAUX	0.425143614302883	FAUX	0.891577845594731	FAUX	1.02909481129797	FAUX	0.729491425304309	FAUX	-1.4273054183155	FAUX
1Q3D7	lo.sham	1	19444	5.415393646	5.411833434	0.00454977	4.900311636	4.898170993	0.019030425	0.904845609	0.902856457	0.000449875	14060	5.419986989	5.417406087	0.004475021	4.819719396	4.835148157	0.052746672	0.889191468	0.891042443	0.001576927	0.19658606	0.751778094	0.369438733	1.268359583	5.443332481	5.427017643	0.045189905	-1.14757227653637	FAUX	-1.56924885160648	FAUX	-1.33301125264146	FAUX	-1.43538289170727	FAUX	-0.500707648304843	FAUX	-1.68511450349915	FAUX	-1.77943244670684	FAUX	-1.26306057866631	FAUX	-1.68028586605442	FAUX	-1.33007814594504	FAUX
1Q3D9	lo.sham	1	16549	5.415747097	5.412361413	0.004639506	4.904155443	4.904055219	0.021995397	0.905492292	0.904145663	0.000542862	12028	5.418557843	5.415263894	0.004465353	4.823332961	4.840632953	0.055166982	0.890091475	0.892271177	0.001664987	0.192550715	0.727053542	0.364013844	1.279468579	5.450149481	5.432099029	0.047198377	-0.918631270288618	FAUX	-1.24364379236539	FAUX	-1.13629437778235	FAUX	-1.20040132065866	FAUX	-0.340587380797067	FAUX	-2.12321779152197	FAUX	-1.48152289827479	FAUX	-1.10945490183244	FAUX	-1.4439782319838	FAUX	-1.1486766874642	FAUX
1Q3E1	hi.sham	1	19702	5.420596554	5.418976243	0.004559988	4.933829052	4.931584987	0.020868538	0.910160412	0.907718425	0.000507677	13857	5.427409986	5.42767595	0.004326495	4.853877566	4.879067193	0.070827456	0.894258314	0.897480437	0.002182539	0.153424262	0.689110197	0.335808186	1.358701342	5.471683473	5.458642381	0.049714076	0.141316389599003	FAUX	0.136770040817575	FAUX	0.0198629242513048	FAUX	0.0700792649797055	FAUX	0.801439424050133	FAUX	0.415191466991792	FAUX	0.074650556800938	FAUX	0.188937329841322	FAUX	0.211927351688254	FAUX	0.0250708176492918	FAUX
1Q3E10	lo.EMS	1	12638	5.421293327	5.419000241	0.004756117	4.935013692	4.935487111	0.018515929	0.910265944	0.908458436	0.00043195	8718	5.427377953	5.427052572	0.004581785	4.822751889	4.843052044	0.062072819	0.888547355	0.890643034	0.001899031	0.161046111	0.658522597	0.327992735	1.207251052	5.484606113	5.466957286	0.051123451	-1.31141975589739	FAUX	-1.67508916456798	FAUX	-0.613464440699379	FAUX	-0.604495190585933	FAUX	-1.3814996056273	FAUX	0.287703443512498	FAUX	0.562133616305911	FAUX	-1.13415515154407	FAUX	-1.33975381400881	FAUX	-0.63108641851893	FAUX
1Q3E11	lo.EMS	1	16068	5.420235633	5.417544761	0.004689252	4.937742319	4.938034125	0.023297773	0.910941772	0.908902858	0.000587598	12725	5.423508554	5.422281161	0.004582858	4.845523287	4.859804545	0.057221176	0.893377188	0.89500869	0.001728682	0.174223969	0.693752456	0.347947999	1.229488624	5.466887886	5.449757554	0.050219027	-0.082821726072407	FAUX	-0.518223902838232	FAUX	-0.994006377053853	FAUX	-1.03428759118369	FAUX	-1.06097685295339	FAUX	-0.688105387721764	FAUX	-0.446245671013105	FAUX	-0.166186953312314	FAUX	-0.6179869741709	FAUX	-0.994715505796324	FAUX
1Q3E12	lo.EMS	1	19242	5.420639431	5.418113111	0.00461538	4.927065451	4.927626961	0.022780892	0.90890585	0.907509888	0.000574551	10019	5.441080333	5.446891168	0.004258038	4.865517838	4.913686723	0.106679698	0.894126796	0.901283685	0.003342153	0.11647869	0.629004891	0.306221488	1.532751543	5.506932291	5.494391164	0.047038527	0.107861246183792	FAUX	1.14460150828616	FAUX	2.61031990952129	VRAI	2.45353678861389	FAUX	3.31012380415995	VRAI	4.3449261761775	VRAI	2.17051648797128	FAUX	0.683742836063076	FAUX	1.70347949454581	FAUX	2.71218486031654	VRAI
1Q3E2	hi.sham	1	16517	5.417437652	5.414481983	0.004582064	4.922458164	4.917232349	0.023378101	0.908586943	0.906149164	0.000584592	12677	5.422818504	5.420931401	0.004544407	4.841354321	4.856278658	0.059238635	0.892715044	0.894369681	0.001794119	0.189003708	0.696537036	0.354114308	1.278519657	5.463362717	5.44387917	0.051715329	-0.251255875630045	FAUX	-0.687556372925816	FAUX	-0.847826929629872	FAUX	-0.866787957990462	FAUX	-0.354264732421285	FAUX	-0.96414694608821	FAUX	-0.790881312342114	FAUX	-0.343401655172492	FAUX	-0.769896728876529	FAUX	-0.843507600600174	FAUX
1Q3E3	hi.sham	1	17479	5.415771168	5.411712278	0.004465082	4.911923227	4.908554715	0.020111187	0.906923774	0.905057428	0.000484753	13239	5.418895268	5.41621932	0.004473241	4.842073275	4.855955048	0.055159545	0.89349744	0.89499622	0.001664362	0.191177581	0.730946446	0.359351223	1.261880713	5.453174441	5.431347679	0.047613008	-0.0522323930079926	FAUX	-0.521528356925732	FAUX	-1.13769056273337	FAUX	-1.20204688989442	FAUX	-0.594091280592416	FAUX	-1.92782210492302	FAUX	-1.5255727577451	FAUX	-0.312840307643833	FAUX	-0.783839182426582	FAUX	-1.14923408822969	FAUX
1Q3E4	hi.EMS	1	15896	5.416395581	5.412921478	0.004548638	4.916226498	4.912323042	0.01989278	0.907609118	0.905182062	0.000466968	10454	5.41978443	5.417028038	0.004461022	4.835924039	4.855942946	0.065967956	0.892211165	0.894280077	0.002023571	0.195810216	0.734647025	0.336929439	1.295651786	5.449709852	5.430213775	0.049910251	-0.379431062364294	FAUX	-0.711300743740203	FAUX	-0.335255042619049	FAUX	-0.302366281089949	FAUX	-0.107329628793758	FAUX	-1.76242990408806	FAUX	-1.59205084632274	FAUX	-0.574232466852577	FAUX	-0.784360586502067	FAUX	-0.339147149258928	FAUX
1Q3E6	hi.EMS	1	15334	5.422017191	5.421299485	0.004651707	4.935131463	4.933310092	0.021078988	0.9101602	0.907650462	0.000513219	11739	5.420887079	5.417229982	0.004662385	4.864807087	4.872543753	0.049939156	0.897354185	0.897424024	0.001464964	0.205128205	0.690178039	0.399228602	1.306586477	5.457259604	5.441056969	0.054855371	0.928834511072833	FAUX	0.121821029715922	FAUX	-1.5831249417154	FAUX	-1.7438380853982	FAUX	0.0502782817712347	FAUX	-1.72113001635773	FAUX	-0.956340229553774	FAUX	0.653530182239136	FAUX	-0.0691293498557068	FAUX	-1.54050056997679	FAUX
1Q3E7	lo.sham	1	13013	5.421154745	5.419747634	0.004594702	4.933165018	4.930786077	0.019455146	0.909940198	0.907665855	0.000453769	9005	5.425929171	5.42431309	0.004652419	4.84781118	4.860284091	0.054731009	0.893405458	0.894758818	0.001657466	0.173237091	0.665074958	0.347770137	1.192805405	5.479932793	5.462210762	0.052358324	-0.0756304906190866	FAUX	-0.584438060957648	FAUX	-1.15309550900896	FAUX	-1.22022399496496	FAUX	-1.58971291869023	FAUX	-0.272552365221479	FAUX	0.283856228706905	FAUX	-0.0689330357022852	FAUX	-0.597326154572893	FAUX	-1.18135272402905	FAUX
1Q3E8	lo.sham	1	16152	5.420136581	5.417882542	0.004594872	4.925398052	4.923057408	0.020821498	0.908678286	0.906487967	0.000502269	11519	5.425184537	5.425260255	0.004534497	4.834516569	4.856082101	0.066297868	0.891066167	0.893778151	0.002037689	0.173973435	0.703272854	0.332579878	1.271689852	5.466192183	5.449734426	0.048597882	-0.670692123969027	FAUX	-0.844307273196244	FAUX	-0.303716899997417	FAUX	-0.268710533779624	FAUX	-0.452706590139656	FAUX	-0.078846148834685	FAUX	-0.447601610521738	FAUX	-0.634061301251126	FAUX	-0.77836521514839	FAUX	-0.314420350637954	FAUX
1Q3E9	lo.sham	1	15218	5.419713966	5.41731555	0.004690565	4.919442922	4.91873523	0.021297062	0.907649165	0.90596107	0.000513909	10563	5.423817348	5.4216615	0.004632833	4.836161558	4.860565577	0.069829737	0.891589494	0.894669931	0.002141721	0.169648774	0.694594339	0.333144238	1.29338914	5.469700862	5.450913901	0.04843838	-0.537569814946283	FAUX	-0.607992432286802	FAUX	-0.0713202394779617	FAUX	-0.0242217703461143	FAUX	-0.139942430418264	FAUX	-0.814833241635717	FAUX	-0.3784518028439	FAUX	-0.56413599238599	FAUX	-0.58519857668593	FAUX	-0.0497079015040573	FAUX
1Q3F1	hi.sham	1	29654	5.415882446	5.41225049	0.00445869	4.864434438	4.86576114	0.023062619	0.898151298	0.896923094	0.000618369	11280	5.429582583	5.429387255	0.004066249	4.850889847	4.893811678	0.096956073	0.893350497	0.899580551	0.003081542	0.101152482	0.717996454	0.283650568	1.385077825	5.470622775	5.457721466	0.040120772	-1.29878276948381	FAUX	-1.31655430554298	FAUX	0.0348015155938265	FAUX	0.0901519429927547	FAUX	1.90514092218079	FAUX	1.44076213595847	FAUX	0.31087820508172	FAUX	-1.01676230144439	FAUX	-0.828518703341163	FAUX	0.0560791697282315	FAUX
1Q3F5	hi.EMS	1	40733	5.413117944	5.408367181	0.004399763	4.857452502	4.857519444	0.021501859	0.897321692	0.896424792	0.000567791	8626	5.447874492	5.453133267	0.003784302	4.887328455	4.963957735	0.153088908	0.897003214	0.910143544	0.004912016	0.061094366	0.595641085	0.268620957	1.708515367	5.521640339	5.511377949	0.043061077	-0.381187402098088	FAUX	1.47235417612292	FAUX	2.69583619371203	VRAI	2.50359905349269	FAUX	6.52177919119794	VRAI	6.42231528324816	VRAI	4.38992314641033	VRAI	0.586591751676038	FAUX	2.40848760913725	FAUX	2.81415232192442	VRAI
1Q3F6	hi.EMS	1	28020	5.413292353	5.409684643	0.004424523	4.866043168	4.863144346	0.020694385	0.898878106	0.897181817	0.000535455	11917	5.424234661	5.422773629	0.004387711	4.890454499	4.926074789	0.078660079	0.901559022	0.90692761	0.002496633	0.097591676	0.713602417	0.267374182	1.132081323	5.477642136	5.455129725	0.034653959	0.76327254798805	FAUX	0.623262861845072	FAUX	-0.815504543133826	FAUX	-0.828141566323857	FAUX	-1.70604572559763	FAUX	0.0533237140753773	FAUX	0.113850233358654	FAUX	0.724142431922468	FAUX	0.66031614260311	FAUX	-0.842890031527014	FAUX
1Q3F7	lo.sham	1	28931	5.415249921	5.410161195	0.004518207	4.863548754	4.864558542	0.022049568	0.898089992	0.897038252	0.000576655	12004	5.419970452	5.416001074	0.004352093	4.853445532	4.880133046	0.071703737	0.895433604	0.899649172	0.002258174	0.108963679	0.742252582	0.288598528	1.171428935	5.463089897	5.440864234	0.032506391	-0.775487553082218	FAUX	-1.2984365534134	FAUX	-1.16216211287226	FAUX	-1.23320576678781	FAUX	-1.14441119724211	FAUX	-1.3674556014341	FAUX	-0.970633423520564	FAUX	-0.904308282804356	FAUX	-1.45974189711337	FAUX	-1.18468819845898	FAUX
1Q3F8	lo.sham	1	28954	5.414005627	5.408729967	0.00448583	4.861409361	4.862971713	0.021438907	0.897905399	0.896708319	0.000564196	12407	5.420855473	5.418277255	0.004361363	4.848212009	4.878880685	0.070490234	0.894319882	0.898650569	0.00221466	0.110260337	0.740066092	0.294409519	1.18360072	5.463056575	5.442623987	0.031190851	-1.05526453765441	FAUX	-1.56209405811091	FAUX	-1.22542018864041	FAUX	-1.30939308343969	FAUX	-0.970675247835072	FAUX	-0.88994735186585	FAUX	-0.836854406125076	FAUX	-1.13459123747018	FAUX	-1.51753417562306	FAUX	-1.24431337228834	FAUX
1Q3F9	lo.sham	1	29068	5.415265035	5.411665153	0.004435068	4.861198097	4.862006084	0.020114589	0.897658108	0.896340486	0.000518859	12068	5.42343362	5.421298662	0.004182074	4.822411637	4.870863125	0.10553375	0.889118431	0.897331605	0.00338311	0.113109049	0.73110706	0.263810128	1.325230166	5.463313164	5.446476583	0.037505991	-2.3619158170401	FAUX	-1.91033530816304	FAUX	0.473203211444601	FAUX	0.529461683959306	FAUX	1.05089564458563	FAUX	-0.256101990796608	FAUX	-0.543974378472465	FAUX	-2.26984676145221	FAUX	-1.88751779894599	FAUX	0.477541236304963	FAUX
1Q3G1	hi.sham	1	15651	5.421516451	5.420729519	0.004552627	4.934083046	4.93578428	0.022282053	0.910050367	0.908285443	0.000554355	10014	5.427984997	5.428256315	0.004530424	4.864877779	4.888224438	0.06680809	0.896199752	0.899650725	0.002047399	0.143998402	0.674355902	0.332723283	1.277698249	5.484885636	5.46442321	0.047826896	0.635173403252975	FAUX	0.711879668133344	FAUX	-0.282025770598348	FAUX	-0.24563059619696	FAUX	-0.366104152355636	FAUX	0.53388283362079	FAUX	0.413566781026566	FAUX	0.656535162779628	FAUX	0.606459235928787	FAUX	-0.276179375329414	FAUX
1Q3G12	lo.EMS	1	15155	5.420986246	5.419359216	0.004649933	4.937828162	4.933302496	0.018697074	0.910835592	0.908562691	0.00043763	11098	5.423558353	5.422333718	0.004678592	4.855904808	4.880236054	0.071967889	0.895276146	0.898640393	0.002224792	0.14885565	0.661921067	0.323844518	1.270130532	5.489347744	5.465689129	0.046606994	0.400229356132815	FAUX	0.444149459061918	FAUX	0.114251728628118	FAUX	0.166771256846196	FAUX	-0.475181954747782	FAUX	-0.677356872294516	FAUX	0.487784594363667	FAUX	0.275111476291152	FAUX	0.262286704609934	FAUX	0.110545905344536	FAUX
1Q3G3	hi.sham	1	13878	5.424133584	5.423634107	0.004587421	4.940686584	4.941906292	0.018220104	0.910837444	0.908814208	0.00043006	9545	5.428637447	5.430036333	0.00454065	4.873182549	4.897156809	0.067749215	0.897616374	0.900571143	0.00207938	0.154112101	0.631011001	0.339968929	1.313204382	5.498113856	5.478782868	0.050014097	0.995529340654287	FAUX	0.955783358774735	FAUX	-0.210583545128563	FAUX	-0.169998611795033	FAUX	0.145665904463784	FAUX	0.897917137971559	FAUX	1.25543929974861	FAUX	1.00955491385635	FAUX	0.99130262074219	FAUX	-0.205642358330443	FAUX
1Q3G5	hi.EMS	1	18043	5.41951678	5.417738997	0.004687384	4.928212223	4.927991073	0.019458897	0.909305253	0.90724359	0.000457735	10649	5.434541871	5.436399615	0.004221162	4.878909911	4.907674653	0.079271938	0.897719855	0.902656756	0.002515874	0.100760635	0.64550662	0.270496824	1.172211256	5.506123238	5.48403491	0.04359848	1.02185251843791	FAUX	1.50845476236492	FAUX	0.76449862128926	FAUX	0.809335313839752	FAUX	-1.88654808245976	FAUX	2.19928203217865	FAUX	1.56335400265966	FAUX	1.25301402320752	FAUX	1.44445472177999	FAUX	0.657982036011892	FAUX
1Q3G7	lo.sham	1	12469	5.420533267	5.418518384	0.00467688	4.932016087	4.934649923	0.026820179	0.909850008	0.908113781	0.000728955	8702	5.42596439	5.425305928	0.004677872	4.859560843	4.878714198	0.062928152	0.895562503	0.897919486	0.001923313	0.151689267	0.645598713	0.329694578	1.209233418	5.496663945	5.471984416	0.049569863	0.473071967052588	FAUX	0.253114648889582	FAUX	-0.559220979930256	FAUX	-0.544827728980629	FAUX	-1.35292663879768	FAUX	-0.0695054911657548	FAUX	0.856862264790616	FAUX	0.430522470891571	FAUX	0.196718871137879	FAUX	-0.566979484412642	FAUX
1Q3H1	hi.sham	1	15200	5.423067789	5.422337823	0.004649068	4.937720957	4.937858774	0.020503002	0.910461885	0.908427241	0.000492877	10339	5.429436082	5.430608723	0.004402314	4.880429411	4.908538632	0.078835626	0.898820839	0.9024172	0.002458793	0.133571912	0.647064513	0.31097781	1.315982634	5.495591925	5.47501853	0.05075961	1.30191743440268	FAUX	1.44497426490043	FAUX	0.636985608186455	FAUX	0.686384186574675	FAUX	0.185710428149277	FAUX	1.01497752470194	FAUX	1.03474513604492	FAUX	1.31760503677695	FAUX	1.48167850063644	FAUX	0.625280591505738	FAUX
1Q3H10	lo.EMS	1	19269	5.418728064	5.416665466	0.004512355	4.920828508	4.916174858	0.019668519	0.908067644	0.90594451	0.000457585	10469	5.423092522	5.420648745	0.004376822	4.827928851	4.862161206	0.08623382	0.890200373	0.895226971	0.002722629	0.179291241	0.735504824	0.281770772	1.250706191	5.447480476	5.437587275	0.04871319	-0.890930132743714	FAUX	-0.460381116737905	FAUX	1.22636777256675	FAUX	1.24339838490259	FAUX	-0.755156011546641	FAUX	-1.02195337295039	FAUX	-1.15976011789474	FAUX	-0.91409248435717	FAUX	-0.516452298092455	FAUX	1.17977285973757	FAUX
1Q3H12	lo.EMS	1	13863	5.422128591	5.420566304	0.004592344	4.928575675	4.927051969	0.020855131	0.908932565	0.907008816	0.000506714	10046	5.430378773	5.431109547	0.004478275	4.872949481	4.900282385	0.071954065	0.897281899	0.900539229	0.002210278	0.117161059	0.617857854	0.335117096	1.343287148	5.518351451	5.487989155	0.048977742	0.91044662122573	FAUX	0.947326394240026	FAUX	0.0818289632215178	FAUX	0.133661708056956	FAUX	0.579265893094069	FAUX	1.11740183526635	FAUX	1.79518196108278	FAUX	0.999647642812845	FAUX	1.12596532645955	FAUX	0.109509800976898	FAUX
1Q3H3	hi.sham	1	15234	5.420185808	5.417205887	0.00459412	4.933520221	4.933613812	0.021432071	0.910177076	0.908751838	0.000535628	10886	5.424843741	5.42414467	0.004683913	4.852481742	4.877417422	0.073735089	0.894427926	0.897985305	0.002274457	0.158092963	0.673158185	0.327638869	1.299954352	5.479073629	5.461170506	0.047804288	0.184461767303503	FAUX	0.270556177645326	FAUX	0.225198169576083	FAUX	0.279258388334773	FAUX	-0.0453143018560345	FAUX	-0.306996206541575	FAUX	0.222868499135953	FAUX	0.129603544435221	FAUX	0.140848412422622	FAUX	0.24299697873073	FAUX
1Q3H4	hi.EMS	1	16549	5.42181271	5.420463229	0.004614855	4.935272291	4.933644171	0.019561146	0.910225211	0.9084861	0.000469351	10844	5.423718115	5.4233786	0.004664455	4.88093665	4.908098801	0.074341853	0.899876703	0.9038716	0.002317882	0.162947252	0.67161564	0.300764924	1.200724608	5.48099029	5.458526806	0.045940719	1.5705048638569	FAUX	1.83037907844041	FAUX	0.32220509997305	FAUX	0.376610082365385	FAUX	-1.47556894899141	FAUX	-0.463666397255141	FAUX	0.0678746700527264	FAUX	1.33916678809775	FAUX	1.46272876704547	FAUX	0.2884737459852	FAUX
1Q3H5	hi.EMS	1	16807	5.417903537	5.415624302	0.004581382	4.920356937	4.917610526	0.021522339	0.908124186	0.906016776	0.00052876	12008	5.423452392	5.421496162	0.004482217	4.845250089	4.867211078	0.073040105	0.893320481	0.896269221	0.002254219	0.171385743	0.715522985	0.332308934	1.341455492	5.461040323	5.443231686	0.047343156	-0.0972466779242008	FAUX	-0.184192883162536	FAUX	0.179988583914049	FAUX	0.233570734984706	FAUX	0.552865195073993	FAUX	-0.848646778247452	FAUX	-0.828841755822882	FAUX	-0.177800073236704	FAUX	-0.298882983813563	FAUX	0.190908150762061	FAUX
1Q3H7	lo.sham	1	23970	5.422023375	5.421080484	0.004536252	4.932508383	4.933795942	0.021399054	0.909669964	0.907730577	0.000518028	12565	5.428968989	5.428081314	0.004463649	4.848249223	4.879084405	0.08354065	0.892970465	0.897564682	0.002616676	0.136490251	0.699721448	0.302048968	1.306716096	5.474777641	5.459197916	0.040009958	-0.186282669025199	FAUX	0.159094317850474	FAUX	0.989679797981836	FAUX	1.02310164258131	FAUX	0.0521465540214079	FAUX	0.498093101553168	FAUX	0.107220249595041	FAUX	-0.0503126728480597	FAUX	0.212668915640261	FAUX	0.977920631743288	FAUX
1Q4A11	lo.EMS	1	23323	5.418923146	5.416422473	0.004510352	4.90410529	4.902791307	0.01732242	0.904957368	0.903006911	0.000394038	12264	5.429023558	5.429068818	0.00435579	4.851068255	4.901147611	0.108390555	0.893444008	0.901369113	0.003410836	0.158675799	0.707028702	0.313567336	1.564202876	5.460637019	5.453904394	0.050483439	-0.0658242604554935	FAUX	1.16723927122008	FAUX	2.7637505831069	VRAI	2.58051308418252	VRAI	3.7634497260917	VRAI	0.700049110809	FAUX	-0.203126326838065	FAUX	0.0695189389747298	FAUX	1.16324283121933	FAUX	2.84041304391787	VRAI
1Q4A2	hi.sham	1	16352	5.41917621	5.416215989	0.004787435	4.897632185	4.898522244	0.01934016	0.903715298	0.902206771	0.000446327	10445	5.425725135	5.42537769	0.00450663	4.83572599	4.85926142	0.06793755	0.891217349	0.894162205	0.002108161	0.155959789	0.701675443	0.299455726	1.162683741	5.471443195	5.452280299	0.045293146	-0.632234912851147	FAUX	-0.742535917132387	FAUX	-0.146289786608008	FAUX	-0.102430044647781	FAUX	-2.02387356628246	FAUX	-0.0548293307286912	FAUX	-0.298343145253531	FAUX	-0.582651147764982	FAUX	-0.641387039324576	FAUX	-0.191526710465919	FAUX
1Q4A3	hi.sham	1	17068	5.414355921	5.410070818	0.004568151	4.886528379	4.883033666	0.019703983	0.902471034	0.900856908	0.000469436	11163	5.41875287	5.416237641	0.004332028	4.832243514	4.851083984	0.056176308	0.891715611	0.89388486	0.00171451	0.199140016	0.762071128	0.33722484	1.214368591	5.439845171	5.422463439	0.046498857	-0.505488561261649	FAUX	-0.816030208944297	FAUX	-1.02566515005525	FAUX	-1.07097924139327	FAUX	-1.27891047437934	FAUX	-1.92407524815514	FAUX	-2.04643457114836	FAUX	-0.730684484106724	FAUX	-0.993704710560473	FAUX	-1.07302802738238	FAUX
1Q4A5	hi.EMS	1	22547	5.419035326	5.415945246	0.00452846	4.89484834	4.892386818	0.019153483	0.90322458	0.901638332	0.000446971	12405	5.425463982	5.425472267	0.004482564	4.879889705	4.909026209	0.076861588	0.899375136	0.903778207	0.002381204	0.152922209	0.723579202	0.323180126	1.338246335	5.462016679	5.448271808	0.040987958	1.44291779655555	FAUX	1.80563065176897	FAUX	0.463659857522775	FAUX	0.516947534248252	FAUX	0.506609792937343	FAUX	-0.0354872384563537	FAUX	-0.533351417347774	FAUX	1.29466317592175	FAUX	1.50268532883886	FAUX	0.477327076337599	FAUX
1Q4A9	lo.sham	1	17964	5.419717124	5.416426635	0.004659147	4.899263568	4.899073245	0.019786169	0.903929299	0.902545451	0.000469838	11812	5.423822493	5.422881897	0.004435742	4.836134498	4.86569606	0.074419661	0.891575304	0.895736782	0.002295395	0.164663055	0.727395869	0.333324478	1.365299374	5.459239154	5.441953437	0.044430923	-0.541179423403397	FAUX	-0.325285122929048	FAUX	0.271971482383261	FAUX	0.326312878163286	FAUX	0.896540605908948	FAUX	-0.56524791557352	FAUX	-0.903782447668341	FAUX	-0.565286260781633	FAUX	-0.36415620804185	FAUX	0.294305430637777	FAUX
1Q4B10	lo.EMS	1	19983	5.415848455	5.412121883	0.004595238	4.895242742	4.895544087	0.021708278	0.903827166	0.902387505	0.000530006	13906	5.421528987	5.419902903	0.004472085	4.83117973	4.854937284	0.067444171	0.891043632	0.894622179	0.002065705	0.178196462	0.743923486	0.34198489	1.328079529	5.444806713	5.434153571	0.046771799	-0.676424507801351	FAUX	-0.620646345004203	FAUX	-0.241132071856911	FAUX	-0.202266980236267	FAUX	0.360069844915067	FAUX	-1.17448670330194	FAUX	-1.36106999832684	FAUX	-0.775903889686832	FAUX	-0.827688653379065	FAUX	-0.228505308324795	FAUX
1Q4B11	lo.EMS	1	18370	5.418346303	5.416001075	0.004626055	4.912264443	4.910571048	0.019589597	0.906554794	0.90481702	0.000460974	13642	5.423654332	5.422394478	0.004534915	4.854990715	4.8731636	0.05677564	0.895092359	0.896960487	0.001711269	0.175194253	0.721521771	0.360793747	1.276601797	5.454063489	5.442545613	0.04653122	0.353478185624938	FAUX	-0.00101271000759908	FAUX	-1.03290520673727	FAUX	-1.07939155025822	FAUX	-0.38190793764365	FAUX	-0.664930748326993	FAUX	-0.869064580387159	FAUX	0.236255146336061	FAUX	-0.0424237844972823	FAUX	-1.02810828614501	FAUX
1Q4B12	lo.EMS	1	17895	5.419754877	5.418089065	0.004567971	4.918380163	4.918575485	0.021811564	0.90744944	0.905947369	0.000538587	11968	5.421483922	5.419877304	0.004471651	4.892557654	4.916556588	0.068140057	0.902368407	0.905699232	0.002087332	0.174799465	0.729445187	0.349697482	1.365085301	5.453868756	5.438037356	0.043239424	2.20433684630993	FAUX	2.31468750128125	FAUX	-0.192819604759728	FAUX	-0.151283361960272	FAUX	0.893455050200207	FAUX	-1.1797219953928	FAUX	-1.13337294174483	FAUX	1.83315324881151	FAUX	1.82712511568688	FAUX	-0.176348875745333	FAUX
1Q4B6	hi.EMS	1	16851	5.415598212	5.412080689	0.004646287	4.885243074	4.883019454	0.022433447	0.902018552	0.900636784	0.000549876	11683	5.420520784	5.419584045	0.004382765	4.811213231	4.826126656	0.057228296	0.887527812	0.889255134	0.001725288	0.191988359	0.744671745	0.365573869	1.321011089	5.44371744	5.431078967	0.04674612	-1.57076796133678	FAUX	-2.04287198959008	FAUX	-1.00158821981188	FAUX	-1.04306100090268	FAUX	0.258188405434606	FAUX	-1.23969685860184	FAUX	-1.54132670176315	FAUX	-1.62464124266034	FAUX	-2.06896933889019	FAUX	-0.994181864079196	FAUX
1Q4B7	lo.sham	1	19248	5.419678076	5.417908259	0.00462577	4.900516677	4.898763565	0.017257083	0.904169985	0.902550811	0.000390271	13146	5.422766007	5.4221596	0.004509711	4.827329411	4.849321118	0.064894413	0.890130644	0.892839139	0.001977238	0.170089761	0.718925909	0.348557689	1.322220674	5.460260728	5.443154987	0.04611149	-0.90866758081318	FAUX	-1.09313823082263	FAUX	-0.438758142356129	FAUX	-0.413652040716629	FAUX	0.275622840893345	FAUX	-0.712966020631804	FAUX	-0.833338435361735	FAUX	-0.93957352231313	FAUX	-1.06965624889363	FAUX	-0.41960885290098	FAUX
1Q4B8	lo.sham	1	19319	5.417734051	5.414221033	0.004557654	4.896271325	4.896234018	0.02130843	0.903707181	0.902251015	0.000524734	13573	5.425925231	5.425675213	0.004398762	4.815506453	4.847547982	0.078046269	0.887423002	0.892039005	0.002419626	0.168275252	0.720106093	0.331934924	1.398182251	5.460295972	5.446572891	0.043866836	-1.59742920604357	FAUX	-1.30516758662365	FAUX	0.549490606623806	FAUX	0.601191942223461	FAUX	1.37050018440419	FAUX	0.00601756988306447	FAUX	-0.632954871266397	FAUX	-1.44214465795573	FAUX	-1.14605026118604	FAUX	0.566118537445696	FAUX
1Q4C1	hi.sham	1	17553	5.419865245	5.417216688	0.004574593	4.921904501	4.923948268	0.020577619	0.908082741	0.9068131	0.000501015	10035	5.424391013	5.42255537	0.004438979	4.83862986	4.868941115	0.080783742	0.891949705	0.896140488	0.002527328	0.177678127	0.70284006	0.308222358	1.314875346	5.464085675	5.44700445	0.049891654	-0.445940451172968	FAUX	-0.218306138017747	FAUX	0.790085665175659	FAUX	0.833838360020038	FAUX	0.169750457440118	FAUX	-0.63202647022662	FAUX	-0.607653595824663	FAUX	-0.459213236232312	FAUX	-0.224345854205723	FAUX	0.771291261085196	FAUX
1Q4C11	lo.EMS	1	15459	5.417486127	5.413624103	0.004577099	4.918852419	4.917437235	0.020376027	0.90791587	0.906186468	0.000490818	10659	5.418413392	5.415264729	0.00452753	4.8110849	4.835164027	0.073485482	0.887863478	0.891268485	0.002295882	0.204615818	0.749695093	0.301899571	1.216277263	5.437325571	5.423738887	0.047908384	-1.48538227899968	FAUX	-1.50934946019958	FAUX	0.273059389697097	FAUX	0.327404765968896	FAUX	-1.25139970101831	FAUX	-2.12304702434749	FAUX	-1.97165809525607	FAUX	-1.63009634589323	FAUX	-1.67960212099758	FAUX	0.224289014111724	FAUX
1Q4C2	hi.sham	1	17507	5.417008789	5.414210156	0.004517224	4.903768332	4.902215087	0.021866865	0.905205174	0.90357455	0.000533263	10881	5.422126412	5.421539764	0.004417593	4.820188205	4.844893253	0.072496805	0.888913125	0.892288021	0.002232664	0.186288025	0.743038324	0.337387574	1.366770706	5.448682252	5.434330935	0.046149574	-1.2183763108406	FAUX	-1.23918026192034	FAUX	0.131836957323222	FAUX	0.184683811308661	FAUX	0.917747749509754	FAUX	-0.839729664073187	FAUX	-1.35067156979808	FAUX	-1.24313241250608	FAUX	-1.26042693610495	FAUX	0.150187989959256	FAUX
1Q4C3	hi.sham	1	16944	5.417015383	5.412767889	0.004631693	4.900178286	4.900361666	0.021609251	0.904544002	0.902976139	0.000525871	11333	5.423620432	5.422170272	0.004462819	4.818889486	4.837064189	0.061290288	0.888427437	0.890807986	0.00184689	0.171181505	0.712609194	0.369612476	1.369739028	5.46355127	5.444647391	0.048717161	-1.34192412707142	FAUX	-1.63137815328975	FAUX	-0.729942007949312	FAUX	-0.733922633080093	FAUX	0.960531860035062	FAUX	-0.710783472985608	FAUX	-0.745842346358	FAUX	-1.29833845169786	FAUX	-1.59773530469832	FAUX	-0.689736866067578	FAUX
1Q4C6	hi.EMS	1	22951	5.419151798	5.416392506	0.004566723	4.896989992	4.896680508	0.020810233	0.903595725	0.902084054	0.000494961	10206	5.423568438	5.423045068	0.004464767	4.815520899	4.834042198	0.06612138	0.887836854	0.890398453	0.002041249	0.163825201	0.724475799	0.318103226	1.224164082	5.461908322	5.444481993	0.040102227	-1.49215481004703	FAUX	-1.7399012483829	FAUX	-0.295764230516398	FAUX	-0.260242310725619	FAUX	-1.13772250030049	FAUX	-0.531877555568518	FAUX	-0.755539236830714	FAUX	-1.44153058636507	FAUX	-1.7279351413728	FAUX	-0.327648069650959	FAUX
1Q4C7	lo.sham	1	18339	5.416088788	5.412213509	0.00460708	4.895474523	4.892906753	0.021446223	0.903832417	0.902318146	0.000523347	12692	5.42000507	5.417313057	0.004422026	4.816823525	4.838745225	0.064848899	0.888659925	0.891122321	0.002004128	0.179640719	0.743775607	0.322545361	1.235183374	5.450769381	5.431469912	0.044423492	-1.28278454631201	FAUX	-1.54808179598496	FAUX	-0.378688681023384	FAUX	-0.348909009551081	FAUX	-0.978895187482456	FAUX	-1.70414021634787	FAUX	-1.51840652832787	FAUX	-1.38615846814071	FAUX	-1.52530934027822	FAUX	-0.423020112607916	FAUX
1Q4C8	lo.sham	1	19632	5.415567767	5.411709754	0.00453831	4.892391042	4.890149847	0.021199319	0.903345229	0.901985104	0.00050961	12113	5.419058655	5.415961079	0.004308858	4.805158271	4.831844189	0.071874078	0.886642325	0.89041778	0.002220058	0.176834806	0.759101791	0.337811389	1.379683145	5.443687091	5.426477102	0.042839725	-1.79601541474473	FAUX	-1.73477974203574	FAUX	0.103676465335101	FAUX	0.155983887168844	FAUX	1.10386206504807	FAUX	-1.98063538141226	FAUX	-1.81112307702288	FAUX	-1.88202591098705	FAUX	-1.82263443492098	FAUX	0.10351480097297	FAUX
1Q4C9	lo.sham	1	13810	5.422054928	5.419430314	0.00466305	4.917522411	4.919872699	0.018968505	0.906914951	0.905294371	0.000457005	8634	5.42744903	5.427203628	0.004562602	4.849025171	4.864086665	0.059091526	0.893375982	0.895076211	0.001802099	0.155200371	0.668288163	0.338270053	1.217362282	5.486105467	5.466390818	0.0460692	-0.0831285046347174	FAUX	-0.500331357173341	FAUX	-0.830000440175231	FAUX	-0.84657192419144	FAUX	-1.23576070605143	FAUX	0.318596145652578	FAUX	0.528922947783308	FAUX	-0.0173286203326284	FAUX	-0.433495582694085	FAUX	-0.85453337298291	FAUX
1Q4D1	hi.sham	1	18653	5.4189108	5.415632641	0.004689425	4.92727131	4.929362719	0.021077007	0.909228131	0.907798217	0.000505097	12160	5.425155987	5.425340178	0.004501336	4.843104511	4.874365833	0.082854113	0.892637296	0.896842917	0.002574023	0.158799342	0.711924342	0.322655689	1.384285389	5.467067332	5.44958561	0.044835429	-0.271033172199696	FAUX	-0.0321678557226021	FAUX	0.89439743523637	FAUX	0.93316097078326	FAUX	1.17019682116969	FAUX	-0.0625009693441258	FAUX	-0.456326337861789	FAUX	-0.269004454751888	FAUX	0.00937337182933204	FAUX	0.926464903716275	FAUX
1Q4D12	lo.EMS	1	21891	5.423207147	5.421913087	0.004577534	4.937332193	4.937620685	0.019766935	0.910364771	0.908597676	0.000464341	11795	5.425076688	5.424472456	0.004590647	4.84774579	4.87447311	0.079085502	0.893524964	0.897997104	0.002472406	0.163967783	0.691818567	0.302025727	1.253589799	5.469574151	5.453981509	0.041828843	-0.0452309227350095	FAUX	0.273682821893794	FAUX	0.667395633367662	FAUX	0.7158347627174	FAUX	-0.713592932007538	FAUX	-0.239960171801424	FAUX	-0.198605258210865	FAUX	-0.0717126384514005	FAUX	0.0139953074601793	FAUX	0.644008717588495	FAUX
1Q4D3	hi.sham	1	15948	5.421633706	5.419550989	0.004707358	4.920301139	4.920305984	0.019775281	0.907481321	0.905617037	0.000453088	11682	5.431595313	5.433393762	0.004433863	4.845508224	4.866547242	0.061003878	0.892028489	0.894399876	0.001837305	0.129601096	0.664954631	0.362502743	1.344617922	5.492954253	5.473679621	0.04452629	-0.425899620116975	FAUX	-0.67955493016946	FAUX	-0.751353900358176	FAUX	-0.757913005054998	FAUX	0.598447094426072	FAUX	1.5845502677609	FAUX	0.956248092997673	FAUX	-0.166827252382672	FAUX	-0.327483776727455	FAUX	-0.711203203736512	FAUX
1Q4D6	hi.EMS	1	19226	5.419661383	5.416453271	0.004530071	4.907607277	4.907497348	0.01950853	0.90546891	0.903759455	0.000448627	13203	5.424534405	5.423419557	0.004486202	4.826078021	4.848829306	0.069210385	0.889617844	0.892443247	0.002138179	0.166931758	0.731424676	0.323575982	1.270932585	5.456719842	5.442012298	0.046443473	-1.03911206402704	FAUX	-1.19804656583499	FAUX	-0.0792326988323904	FAUX	-0.0324469915174487	FAUX	-0.463621509419023	FAUX	-0.455290216226011	FAUX	-0.900331567548163	FAUX	-0.99276769702236	FAUX	-1.09084553836356	FAUX	-0.0961281353224627	FAUX
1Q4D7	lo.sham	1	20062	5.416561655	5.412749421	0.004648961	4.903363898	4.902813036	0.020837752	0.9052057	0.903635869	0.000493622	13570	5.421195204	5.419316221	0.004471961	4.821164765	4.840777101	0.065888694	0.889256428	0.891942284	0.002019238	0.193294031	0.750478998	0.336699677	1.292406483	5.442058498	5.42927898	0.044796004	-1.13104795198572	FAUX	-1.33079790769792	FAUX	-0.34493451364749	FAUX	-0.312719203067243	FAUX	-0.154106023753646	FAUX	-1.29446996962	FAUX	-1.64685564885625	FAUX	-1.20162073089281	FAUX	-1.43776774159621	FAUX	-0.345087810745311	FAUX
1Q4D8	lo.sham	1	18274	5.416430012	5.414296323	0.004494523	4.90142965	4.9001103	0.023176923	0.904869877	0.903512325	0.000577805	12742	5.418962797	5.416212658	0.004369897	4.797677798	4.828682448	0.088050738	0.885287285	0.890602462	0.002779146	0.188667399	0.74870507	0.290807281	1.305377668	5.443416739	5.426908775	0.048253835	-2.14070631282217	FAUX	-1.68584043251003	FAUX	1.35262086836975	FAUX	1.35915590612926	FAUX	0.0328550312411413	FAUX	-1.92918456110911	FAUX	-1.78581511803286	FAUX	-2.20000638683362	FAUX	-1.95885527800319	FAUX	1.31595028128278	FAUX
1Q4D9	lo.sham	1	20000	5.415642396	5.41205042	0.004490835	4.903542906	4.901322072	0.018476152	0.905398595	0.903853082	0.000429005	13154	5.41940972	5.419377405	0.004413466	4.81534704	4.830415429	0.054843672	0.88848495	0.890565512	0.001662831	0.183746389	0.749961989	0.350813826	1.236659356	5.444690702	5.430059729	0.043542842	-1.32729414742422	FAUX	-1.69563189831058	FAUX	-1.14111065738939	FAUX	-1.20607918219861	FAUX	-0.957621020791183	FAUX	-1.28195713274009	FAUX	-1.60108219609579	FAUX	-1.44892099704502	FAUX	-1.88419130873262	FAUX	-1.17290866830196	FAUX
1Q4E1	hi.sham	1	17688	5.417266544	5.414090499	0.004563183	4.925222706	4.924320645	0.022420415	0.909127438	0.907573112	0.000557719	10800	5.423340494	5.421983768	0.004369114	4.849871182	4.875535833	0.066278261	0.894188001	0.897246832	0.002016127	0.164814815	0.710462963	0.35233084	1.372269925	5.467489769	5.444995141	0.045998881	0.123430385409802	FAUX	0.0748665125811766	FAUX	-0.351884163859695	FAUX	-0.320159228729104	FAUX	0.997011115646876	FAUX	-0.748925701827496	FAUX	-0.725454592806683	FAUX	0.0186336751467445	FAUX	0.0597817975688938	FAUX	-0.3158898890014	FAUX
1Q4E10	lo.EMS	1	12726	5.421030334	5.418800774	0.00474019	4.937476772	4.938176852	0.023270261	0.910756744	0.909048224	0.000578968	8300	5.429891494	5.431110351	0.004673798	4.853738505	4.875521371	0.071720294	0.893846938	0.896467479	0.002224173	0.141686747	0.626506024	0.301477825	1.180977	5.508738465	5.485281228	0.049386289	0.0366718308498199	FAUX	-0.131656038056077	FAUX	0.112868947052625	FAUX	0.165361393703785	FAUX	-1.760202436626	FAUX	1.11756626258151	FAUX	1.63642265609057	FAUX	0.183026115008803	FAUX	0.059158714959444	FAUX	0.0919887394804274	FAUX
1Q4E2	hi.sham	1	19246	5.420101755	5.418249073	0.004643676	4.928415666	4.93010559	0.021318091	0.909243347	0.907530069	0.000520443	11977	5.426505227	5.425048139	0.004394094	4.816573805	4.839258016	0.068856851	0.887542655	0.890403551	0.002128094	0.1534608	0.699924856	0.323720761	1.281472959	5.471847598	5.454167747	0.043974917	-1.56699224475265	FAUX	-1.73855031759396	FAUX	-0.101761539202072	FAUX	-0.0559037332519474	FAUX	-0.311697113684968	FAUX	-0.122226328418089	FAUX	-0.187686568215508	FAUX	-1.39677358357906	FAUX	-1.50321618895909	FAUX	-0.122625395269562	FAUX
1Q4E7	lo.sham	1	17844	5.41422789	5.409192332	0.004560794	4.910799905	4.907580638	0.021366775	0.906972428	0.905084593	0.000520108	12299	5.420815256	5.417655171	0.00450638	4.82730263	4.842219073	0.057674767	0.890463173	0.892582214	0.001760171	0.201073258	0.748272217	0.338691424	1.211666777	5.437216305	5.427432549	0.048575993	-0.824079878865781	FAUX	-1.16122137969416	FAUX	-0.923663228377512	FAUX	-0.953296405428917	FAUX	-1.31785325376609	FAUX	-1.63417393960324	FAUX	-1.75510749695855	FAUX	-0.940711930957023	FAUX	-1.37564164033079	FAUX	-0.9607190057803	FAUX
1Q4E9	lo.sham	1	17956	5.422362075	5.420828414	0.004557909	4.933031967	4.933785826	0.021173376	0.909718341	0.907731989	0.000521922	13489	5.426372902	5.42717602	0.004607768	4.851100493	4.872610732	0.060440159	0.893927609	0.896125108	0.001831601	0.168433538	0.699088146	0.349528379	1.265901518	5.467412216	5.453350452	0.046878946	0.0571926711488496	FAUX	-0.222381719723088	FAUX	-0.764096042695178	FAUX	-0.772219299431593	FAUX	-0.536137134943557	FAUX	0.312949989785348	FAUX	-0.235602625839511	FAUX	0.0708893141609135	FAUX	-0.0662436182765689	FAUX	-0.753453762042415	FAUX
1Q4F1	hi.sham	1	15852	5.423426814	5.422776911	0.004625661	4.941966926	4.943766483	0.020570868	0.911184793	0.909093167	0.000494174	10380	5.430176316	5.432210616	0.004424128	4.857397539	4.883422933	0.068190147	0.8944596	0.897361124	0.002098251	0.137572254	0.647687861	0.328805174	1.290879268	5.497264532	5.474394754	0.048024771	0.192518901783458	FAUX	0.105153013508788	FAUX	-0.168427695191403	FAUX	-0.125643182662242	FAUX	-0.176118640766189	FAUX	1.34258320279013	FAUX	0.998174636090268	FAUX	0.338564591313543	FAUX	0.39959059641546	FAUX	-0.17259464630559	FAUX
1Q4F10	lo.EMS	1	15213	5.420885712	5.418402394	0.004621646	4.936662681	4.935532456	0.019300711	0.910633294	0.908679999	0.0004529	10865	5.426968932	5.426955088	0.004593673	4.847335445	4.867470429	0.055458993	0.893121451	0.895208855	0.001642976	0.161343764	0.687620801	0.390473559	1.356742954	5.479203583	5.459378916	0.043531317	-0.147875315783148	FAUX	-0.465181717399411	FAUX	-1.18546466091344	FAUX	-1.25854167272948	FAUX	0.773212065750245	FAUX	0.26776683605941	FAUX	0.117831848136528	FAUX	-0.0891556127608384	FAUX	-0.287709073023857	FAUX	-1.12679055664111	FAUX
1Q4F12	lo.EMS	1	14550	5.424546647	5.424242787	0.004605729	4.942982232	4.943613213	0.022653492	0.91118096	0.909207096	0.00056421	9823	5.430580872	5.43235347	0.004451638	4.869628224	4.893506546	0.069668451	0.896645416	0.899793239	0.00214871	0.130306424	0.640435712	0.325990469	1.28962393	5.502182867	5.480106158	0.046822204	0.748540037744053	FAUX	0.749644781992551	FAUX	-0.0557075408816604	FAUX	-0.0080118632735532	FAUX	-0.194212540194425	FAUX	1.37179850090154	FAUX	1.33302063805763	FAUX	0.858467415136252	FAUX	0.83403423495984	FAUX	-0.061796235491249	FAUX
1Q4F2	hi.sham	1	15512	5.420335613	5.418645936	0.004659849	4.936424707	4.936149164	0.018910019	0.910680607	0.90823464	0.000435661	9674	5.425406406	5.424783664	0.004460117	4.862200773	4.88559866	0.073540763	0.896125745	0.898792641	0.00227798	0.171283854	0.708910482	0.326749335	1.32680059	5.460871467	5.448975158	0.048953623	0.616347730731107	FAUX	0.48449400805246	FAUX	0.233068184908001	FAUX	0.287190823023774	FAUX	0.341635770872179	FAUX	-0.176314530134807	FAUX	-0.492115683457553	FAUX	0.542740802219228	FAUX	0.493329889500118	FAUX	0.228432307337087	FAUX
1Q4F3	hi.sham	1	13609	5.422493366	5.421464075	0.004746633	4.938186531	4.93999821	0.023383266	0.910641826	0.90919125	0.000583252	8914	5.430422891	5.430890607	0.004666373	4.867277351	4.885194362	0.057936355	0.896230446	0.897963332	0.001729638	0.145277092	0.631478573	0.375469166	1.323000929	5.503719464	5.48331408	0.049824417	0.642981248353923	FAUX	0.264733501649798	FAUX	-0.991870772552771	FAUX	-1.03181790876616	FAUX	0.286869099270275	FAUX	1.0726260686199	FAUX	1.52109345803735	FAUX	0.7585363392277	FAUX	0.47591106410724	FAUX	-0.941113069052738	FAUX
1Q4F7	lo.sham	1	16359	5.421399559	5.418677406	0.004703189	4.927312997	4.926625366	0.022488139	0.908815307	0.90708903	0.000548055	10947	5.424471081	5.424198637	0.004477561	4.847962593	4.865204686	0.056569914	0.893680517	0.895428525	0.001726969	0.148807893	0.689686672	0.325700283	1.157684254	5.477244272	5.456098693	0.043821606	-0.00566183011146144	FAUX	-0.406970856982517	FAUX	-0.997833040767613	FAUX	-1.0387145781203	FAUX	-2.09593401133452	FAUX	-0.295959329777954	FAUX	-0.0744798071257318	FAUX	-0.0624967611793476	FAUX	-0.38532662666523	FAUX	-1.04352738388349	FAUX
1Q4F8	lo.sham	1	15098	5.417934425	5.416043566	0.004641336	4.93521881	4.933051762	0.021222151	0.910856334	0.908621275	0.00050693	10813	5.425113111	5.423837095	0.004466748	4.850210435	4.862822836	0.054094677	0.893986492	0.895341442	0.001638049	0.175529455	0.706279478	0.338358428	1.177493567	5.465232878	5.448579568	0.048366196	0.0721711471728026	FAUX	-0.430047182187082	FAUX	-1.19647106611933	FAUX	-1.27160920906904	FAUX	-1.81041113449621	FAUX	-0.369898857616229	FAUX	-0.515308182170308	FAUX	0.0330546656873628	FAUX	-0.487946548757331	FAUX	-1.22904560340319	FAUX
1Q4G1	hi.sham	1	16412	5.422235058	5.419575781	0.004696844	4.941895028	4.941893879	0.020400549	0.911368996	0.909540713	0.000482874	10843	5.426806275	5.426017316	0.00458209	4.854577442	4.877759963	0.073770836	0.894481975	0.897675202	0.002261284	0.145623905	0.663008393	0.340023425	1.36432993	5.48417516	5.466996556	0.046702246	0.198210585309029	FAUX	0.188381267790271	FAUX	0.195771058600395	FAUX	0.249543313553068	FAUX	0.88256745904547	FAUX	0.0759815970004284	FAUX	0.564435922796057	FAUX	0.218687708395389	FAUX	0.155606491534813	FAUX	0.245676204919241	FAUX
1Q4G2	hi.sham	1	15586	5.422987472	5.420864668	0.004651005	4.943894217	4.943368357	0.021239822	0.911611842	0.909425089	0.000516127	10074	5.426134699	5.425733064	0.004599819	4.861518741	4.885078384	0.064226136	0.895877713	0.898547176	0.001949175	0.157931308	0.67877705	0.355070037	1.326781992	5.482103806	5.458725454	0.046145338	0.553254115168506	FAUX	0.419447671036789	FAUX	-0.501447963604951	FAUX	-0.481690533056985	FAUX	0.341367707337444	FAUX	0.0178487696468128	FAUX	0.0795209287657642	FAUX	0.513748937680397	FAUX	0.470914253508581	FAUX	-0.469695999782659	FAUX
1Q4G3	hi.sham	1	14241	5.421768321	5.418791667	0.004696302	4.949092596	4.950289382	0.023403218	0.912780141	0.910718503	0.000594701	9683	5.427677129	5.428907086	0.004458054	4.874302507	4.892823383	0.065647901	0.897980857	0.899990663	0.002007367	0.160074357	0.664979862	0.345798754	1.326970249	5.484833853	5.464312157	0.046967676	1.08824540261846	FAUX	0.801960623513673	FAUX	-0.371453092133211	FAUX	-0.341139856852355	FAUX	0.344081162378765	FAUX	0.666973042976312	FAUX	0.407056008359055	FAUX	1.05716216780516	FAUX	0.804600755170488	FAUX	-0.363135168890333	FAUX
1Q4G6	hi.EMS	1	19171	5.416999561	5.413044814	0.004588227	4.929830314	4.927478153	0.020988975	0.910016294	0.90786849	0.000495108	13093	5.423442025	5.423534215	0.00443262	4.855166058	4.873265367	0.065654144	0.895156392	0.896818666	0.002008117	0.172382189	0.730543038	0.339839214	1.307899277	5.457807507	5.441384029	0.042626119	0.369766702773213	FAUX	-0.0385941841969745	FAUX	-0.369777670191985	FAUX	-0.339341780551373	FAUX	0.0692004136348352	FAUX	-0.431841326794382	FAUX	-0.937165481382664	FAUX	0.243708638993077	FAUX	-0.0380392423927926	FAUX	-0.362667258042013	FAUX
1Q4G7	lo.sham	1	17649	5.421265769	5.419099522	0.004508615	4.939722277	4.936300061	0.018275537	0.91113294	0.90896355	0.000418091	12332	5.426947579	5.427195508	0.004522588	4.870756216	4.890180609	0.054057009	0.897465298	0.898939272	0.001632341	0.154800519	0.692264029	0.349191047	1.207245525	5.475571158	5.458297833	0.043509136	0.957099093489645	FAUX	0.523350095245932	FAUX	-1.20922214404002	FAUX	-1.28677273360449	FAUX	-1.38157926941676	FAUX	0.316935511573896	FAUX	0.05445052887682	FAUX	0.906416178925795	FAUX	0.690739150960722	FAUX	-1.23186880792578	FAUX
1Q4G9	lo.sham	1	18241	5.420918394	5.41936583	0.004632593	4.942991171	4.9411187	0.02042719	0.911794766	0.909474076	0.000488475	13203	5.426593176	5.427331904	0.004454465	4.869722061	4.891096807	0.067695827	0.897310866	0.900013091	0.002072086	0.157767174	0.701204272	0.349022798	1.360620328	5.469428472	5.453174571	0.042857155	0.917815157390424	FAUX	0.807903871009618	FAUX	-0.226877581980964	FAUX	-0.187196732210585	FAUX	0.829098858949891	FAUX	0.344830073862761	FAUX	-0.245914109613363	FAUX	0.862456244975208	FAUX	0.73021273971778	FAUX	-0.209643771812756	FAUX
1Q4H1	hi.sham	1	20080	5.423145148	5.421527424	0.004622467	4.929868411	4.930467629	0.023481067	0.909002321	0.907153966	0.000596992	12809	5.428753072	5.430060536	0.004404617	4.846247375	4.882695262	0.0939194	0.892628381	0.898098125	0.00296181	0.139433211	0.670544149	0.296827369	1.370653064	5.484083535	5.466290648	0.045240418	-0.273300942417815	FAUX	0.300452609894767	FAUX	1.76067323299915	FAUX	1.72545144975852	FAUX	0.973706379931528	FAUX	0.902866931888304	FAUX	0.52305021946345	FAUX	-0.135407369348195	FAUX	0.368239528410054	FAUX	1.7558046165254	FAUX
1Q4H11	lo.EMS	1	15400	5.421840028	5.420864668	0.004628893	4.931018339	4.933021361	0.022226542	0.909427081	0.907508688	0.000546162	9314	5.431415651	5.432581297	0.004501267	4.850620092	4.884245778	0.090405227	0.893000295	0.898063313	0.002840504	0.12744256	0.650848186	0.296974008	1.330907284	5.497442776	5.478933542	0.046483544	-0.178694605580833	FAUX	0.291227697649888	FAUX	1.48968825432939	FAUX	1.48350391477023	FAUX	0.400827883449463	FAUX	1.41839176201306	FAUX	1.26427295719966	FAUX	0.0504683944440541	FAUX	0.4350421528921	FAUX	1.49241847691767	FAUX
1Q4H2	hi.sham	1	17344	5.421393624	5.419512972	0.004576239	4.929368915	4.926872127	0.022196039	0.909196904	0.907417814	0.000542597	10850	5.424425714	5.424064525	0.004513558	4.835645517	4.867184544	0.087863652	0.891369149	0.896050066	0.002731701	0.163317972	0.698709677	0.332877624	1.468688507	5.469129778	5.450384611	0.046690948	-0.593620496798389	FAUX	-0.242267272540509	FAUX	1.24663367636782	FAUX	1.2620599596289	FAUX	2.38674688857906	FAUX	-0.323386787604176	FAUX	-0.409482813849496	FAUX	-0.586071899745904	FAUX	-0.300026177974769	FAUX	1.30192824556779	FAUX
1Q4H3	hi.sham	1	18812	5.421510646	5.41916405	0.004626727	4.934282507	4.933056829	0.023006403	0.910088451	0.907966144	0.000578473	12989	5.426661779	5.425345887	0.004453091	4.838384215	4.869158353	0.082574405	0.891525183	0.896600261	0.002580551	0.155901147	0.688505659	0.314029682	1.352267669	5.47293113	5.456564913	0.045525583	-0.553929048877557	FAUX	-0.0964698293435732	FAUX	0.908980307812799	FAUX	0.946974340788432	FAUX	0.708707241788336	FAUX	-0.0613334126994826	FAUX	-0.04714643987712	FAUX	-0.469655131282199	FAUX	-0.214986345153736	FAUX	0.905500878798494	FAUX
1Q4H5	hi.EMS	1	18307	5.423111778	5.422421571	0.004619344	4.940021596	4.937981527	0.021711942	0.910879367	0.908702933	0.000532952	12988	5.427443396	5.427945154	0.004540046	4.860022026	4.887206439	0.081087298	0.895389362	0.898791739	0.002529114	0.150754543	0.687942716	0.309891916	1.309653878	5.473396522	5.460573128	0.046510908	0.429028893206781	FAUX	0.484254984990151	FAUX	0.794075403291697	FAUX	0.837654064640153	FAUX	0.094490474184809	FAUX	0.470246803998604	FAUX	0.187845650995053	FAUX	0.450126470503963	FAUX	0.562599640207037	FAUX	0.79404268595664	FAUX
1Q4H6	hi.EMS	1	24381	5.419377855	5.416432462	0.004589958	4.92871261	4.926049044	0.023711399	0.909408415	0.907624605	0.000584426	9252	5.458975747	5.46780782	0.00368036	4.894448901	4.940700722	0.112181825	0.896477053	0.904277685	0.003509968	0.088089062	0.580415045	0.323115765	1.783915358	5.536684793	5.52165252	0.048740739	0.70571237680931	FAUX	1.93798848005372	FAUX	2.98520115361034	VRAI	2.76154807890343	VRAI	6.93029049123715	VRAI	8.62262385123707	VRAI	3.76878480602583	VRAI	1.9135465101739	FAUX	2.86735399242613	VRAI	3.12456751483055	VRAI
2Q1A1	hi.sham	1	14222	5.415762664	5.412482388	0.004635815	4.917655549	4.907787443	0.017775967	0.907979765	0.905132596	0.000391308	11689	5.423182145	5.422355067	0.004283765	4.863898403	4.89497476	0.086326388	0.896810471	0.901397311	0.002722521	0.174437505	0.754213363	0.293708722	1.318486902	5.446322423	5.43510346	0.044941742	0.138721881142246	FAUX	0.321821461622311	FAUX	0.709996317708178	FAUX	0.765437965643994	FAUX	-0.384000408935038	FAUX	-0.185776678317693	FAUX	-0.901482784862951	FAUX	0.0988931981835076	FAUX	0.274038714207126	FAUX	0.661731798753341	FAUX
2Q1A10	lo.EMS	1	13566	5.42474416	5.424999174	0.004731637	4.923672936	4.923844774	0.019300543	0.907579862	0.905843935	0.00043051	14173	5.432981744	5.435160865	0.004449148	4.858207064	4.893506546	0.079437086	0.894129724	0.899576971	0.002449891	0.11797079	0.615042687	0.331761257	1.401841487	5.513889494	5.492955847	0.051295181	-0.343249146931544	FAUX	0.0176805322268279	FAUX	0.246532502930596	FAUX	0.312619191739311	FAUX	0.523848898597418	FAUX	1.83855966371197	FAUX	1.3753343762987	FAUX	-0.0883189570277141	FAUX	0.229199743159257	FAUX	0.269283476246527	FAUX
2Q1A12	lo.EMS	1	22441	5.428911072	5.430914761	0.004534142	4.930878304	4.93218955	0.018499346	0.908209618	0.906170059	0.000404839	30091	5.440586007	5.445350402	0.004210461	4.87150885	4.911168266	0.085297847	0.895299439	0.90120886	0.002612071	0.083546575	0.551959058	0.357755002	1.610237371	5.546123498	5.523050258	0.048205082	-0.132946294367196	FAUX	0.290335221532271	FAUX	0.522234228641737	FAUX	0.584851686080683	FAUX	2.79357478088709	VRAI	3.44931832612054	VRAI	2.55971889304907	FAUX	0.34923291349314	FAUX	0.768585249451649	FAUX	0.603141075037138	FAUX
2Q1A2	hi.sham	1	9954	5.418560442	5.415165397	0.004603007	4.928944165	4.926465925	0.020518916	0.909606889	0.907502688	0.000507987	6747	5.425613776	5.423553048	0.004359671	4.913606672	4.940593674	0.079686678	0.905570716	0.910121715	0.002489691	0.142730102	0.662072032	0.308209572	1.317686565	5.491691875	5.465103147	0.053371461	1.71372477728587	FAUX	1.77948779921953	FAUX	0.314191453993016	FAUX	0.380241167679535	FAUX	-0.392717210671171	FAUX	0.00359976470917088	FAUX	0.279173809152397	FAUX	1.7340079174629	FAUX	1.6672315076836	FAUX	0.283501456777954	FAUX
2Q1A3	hi.sham	1	12273	5.413664963	5.409072131	0.004730284	4.913592084	4.906975773	0.022574348	0.907565457	0.905150549	0.000526911	11469	5.424752539	5.424519029	0.004405986	4.87357181	4.898055677	0.076563804	0.898306614	0.901428115	0.002338585	0.167756561	0.739122853	0.35772537	1.49121385	5.453931277	5.440693455	0.046724067	0.40771316598017	FAUX	0.326968168934734	FAUX	0.057315236424218	FAUX	0.12053323462343	FAUX	1.49724031866255	FAUX	0.156301723931903	FAUX	-0.68148500764404	FAUX	0.417092372877745	FAUX	0.368129322363634	FAUX	0.105607286555753	FAUX
2Q1A4	hi.EMS	1	14042	5.419749153	5.416818515	0.004683761	4.919420405	4.921085329	0.019932248	0.907642143	0.905643538	0.000473313	13172	5.428856712	5.429897559	0.004511025	4.882988877	4.911663547	0.070417106	0.899384359	0.902904173	0.002161388	0.129137565	0.66337686	0.337045251	1.331648722	5.492585963	5.470871886	0.044644005	0.601480748542567	FAUX	0.573586741268288	FAUX	-0.24391499351065	FAUX	-0.194954148457424	FAUX	-0.240649576190004	FAUX	1.00653797986034	FAUX	0.506206169173489	FAUX	0.726859443305014	FAUX	0.783711035215552	FAUX	-0.244538681650604	FAUX
2Q1A8	lo.sham	1	17563	5.425114731	5.42431309	0.004597162	4.927940935	4.928549467	0.01893986	0.908306896	0.906145908	0.000424968	21008	5.437453615	5.440159435	0.004264265	4.889207018	4.928518748	0.085008922	0.899086875	0.905011219	0.00262784	0.099009901	0.612814166	0.333317357	1.488223299	5.518327603	5.497228985	0.049105203	0.547996152899809	FAUX	0.925630276387575	FAUX	0.549041113046343	FAUX	0.6108646027426	FAUX	1.46466898914911	FAUX	2.62873196763073	VRAI	1.54350641612154	FAUX	0.931400339220223	FAUX	1.29846560753611	FAUX	0.586682494533587	FAUX
2Q1A9	lo.sham	1	13834	5.417243395	5.415414934	0.004606017	4.915345252	4.910125266	0.023301421	0.907302402	0.904884586	0.000576667	11932	5.427815453	5.428107245	0.004331348	4.852989313	4.9017198	0.113542396	0.893998283	0.901558705	0.003593192	0.172309755	0.743881998	0.304477595	1.558916336	5.444007386	5.443376437	0.047565521	-0.366880901028845	FAUX	0.348787040118013	FAUX	2.19011407098629	FAUX	2.07681745786303	FAUX	2.23461613348216	FAUX	0.723525730733482	FAUX	-0.575894559652863	FAUX	-0.25995280453978	FAUX	0.480030928745837	FAUX	2.21208866871376	FAUX
2Q1B10	lo.EMS	1	17810	5.427655996	5.429354937	0.004557479	4.931716328	4.935431686	0.018631297	0.908581185	0.90652577	0.000422105	20682	5.436682566	5.438645175	0.004327915	4.895077462	4.924945727	0.074349357	0.900318468	0.905339109	0.002298323	0.091722271	0.579150953	0.317718692	1.316867334	5.53255448	5.510446479	0.046665242	0.769424040118755	FAUX	0.980413871397015	FAUX	-0.0111291024620927	FAUX	0.049928868569236	FAUX	-0.401639794786481	FAUX	2.38935824415947	FAUX	2.06368922494413	FAUX	1.1245040136432	FAUX	1.18934623858005	FAUX	-0.0205384406064822	FAUX
2Q1B11	lo.EMS	1	11327	5.418603098	5.416515692	0.004594221	4.932357663	4.925353353	0.019050654	0.910211455	0.907140786	0.000424704	9561	5.431288625	5.433033389	0.004267885	4.895853973	4.928272921	0.084508337	0.901356398	0.905435244	0.00265753	0.11128543	0.694592616	0.295892308	1.316670475	5.48838781	5.465744117	0.041149729	0.956033290886773	FAUX	0.99647602915184	FAUX	0.599513330559992	FAUX	0.659630988868751	FAUX	-0.403783867686987	FAUX	1.50224895635926	FAUX	0.304399587576888	FAUX	1.15004673704367	FAUX	1.29095809859272	FAUX	0.55816672566149	FAUX
2Q1B12	lo.EMS	1	23790	5.427138859	5.427406579	0.00457332	4.941401053	4.942746966	0.019698777	0.91044094	0.908751306	0.000437732	31167	5.438624845	5.442705481	0.004266251	4.868920223	4.925270826	0.117487421	0.895143826	0.904325528	0.003701091	0.090191549	0.552250778	0.308338229	1.61807951	5.540760936	5.52244945	0.050780713	-0.160923928060956	FAUX	0.811065580771298	FAUX	2.37353952728489	FAUX	2.22768101893541	FAUX	2.87898676465167	VRAI	3.0312100831124	VRAI	2.53607371545315	FAUX	0.264082048343851	FAUX	1.19927469904202	FAUX	2.43681657924772	FAUX
2Q1B7	lo.sham	1	11372	5.418757981	5.41629593	0.004579667	4.922885742	4.918722139	0.019482559	0.908441785	0.906217288	0.000449577	9801	5.425281288	5.424888167	0.004451929	4.849526972	4.868415183	0.063551582	0.893799869	0.895712563	0.001922065	0.139883685	0.699316396	0.369099938	1.394546604	5.479026897	5.454832669	0.045036085	-0.40255371892782	FAUX	-0.6279816191753	FAUX	-0.650757786101398	FAUX	-0.642362130483208	FAUX	0.444397306581451	FAUX	0.214654937735837	FAUX	-0.125027327159102	FAUX	-0.373843809922917	FAUX	-0.537085620628743	FAUX	-0.635632493030954	FAUX
2Q1B8	lo.sham	1	19111	5.423012824	5.421774979	0.004671474	4.918473925	4.918098518	0.020124713	0.906909538	0.905267701	0.000457163	22906	5.43545896	5.439226871	0.004382956	4.877475472	4.912402753	0.081437938	0.897257073	0.90221239	0.002499361	0.095608138	0.585916354	0.343476746	1.480563959	5.530305807	5.507506406	0.048382267	0.219016375579737	FAUX	0.45800419923767	FAUX	0.330630199138082	FAUX	0.396589144858919	FAUX	1.38124794500192	FAUX	2.48131255679285	FAUX	1.94798079857501	FAUX	0.545500288174352	FAUX	0.80628624321141	FAUX	0.383261787980343	FAUX
2Q1B9	lo.sham	1	12245	5.422706382	5.421832529	0.004477671	4.922539033	4.924294796	0.020686185	0.907717307	0.905917151	0.000492996	10041	5.430223072	5.432521946	0.004504861	4.829858319	4.88815702	0.125484334	0.88932635	0.898330931	0.0039656	0.12907081	0.675131959	0.309461277	1.633278919	5.482700791	5.469430238	0.047848403	-1.20684690718378	FAUX	-0.190506819401954	FAUX	2.82319785609318	VRAI	2.58846519527589	VRAI	3.04452982308754	VRAI	1.42140021489248	FAUX	0.449469203302839	FAUX	-1.02082880207176	FAUX	0.0658262557563144	FAUX	2.89235983923007	VRAI
2Q1C1	hi.sham	1	8821	5.4215386	5.419197135	0.00478306	4.965434764	4.968291443	0.03010721	0.915823132	0.914536497	0.000798103	7414	5.429743605	5.429540731	0.004580111	4.919384831	4.939816167	0.070706817	0.905924553	0.908439605	0.00213731	0.141893715	0.633935797	0.364756918	1.433164924	5.495921856	5.481518587	0.055840122	1.77734106881226	FAUX	1.49844222600493	FAUX	-0.284846958929771	FAUX	-0.238807218809282	FAUX	0.865005423940163	FAUX	0.950130726813543	FAUX	0.925213798825074	FAUX	1.92407594882478	FAUX	1.64348659456978	FAUX	-0.228035326744435	FAUX
2Q1C10	lo.EMS	1	18082	5.42557575	5.425895982	0.004581505	4.937561556	4.939019776	0.018232527	0.910001007	0.908289494	0.00039646	21575	5.434458346	5.436052866	0.004418188	4.88441518	4.9192978	0.086958493	0.898699479	0.903849997	0.002689342	0.093441483	0.581645423	0.332428343	1.474796042	5.532427909	5.508459688	0.046351935	0.478346294710416	FAUX	0.731614247341083	FAUX	0.653592892147875	FAUX	0.711581444600619	FAUX	1.31842717210317	FAUX	1.97956688883186	FAUX	1.98549781264441	FAUX	0.773776567485164	FAUX	1.01685964246158	FAUX	0.697739589803605	FAUX
2Q1C12	lo.EMS	1	15432	5.427129546	5.428479824	0.004563377	4.952056702	4.954556053	0.019095845	0.912412198	0.910603089	0.000427633	18678	5.439811458	5.442358244	0.004214091	4.901384032	4.937430121	0.082490305	0.900927029	0.906081163	0.002527333	0.080094229	0.536674162	0.352220555	1.558347051	5.554943445	5.531413768	0.051927982	0.878837114465417	FAUX	1.10439565129617	FAUX	0.378181861929992	FAUX	0.443701014159736	FAUX	2.22841581477097	FAUX	2.97631897219555	VRAI	2.88887010154714	VRAI	1.33195371250852	FAUX	1.57061721210042	FAUX	0.443209757137673	FAUX
2Q1C2	hi.sham	1	11864	5.415857997	5.413136244	0.004652448	4.932294193	4.931066117	0.024388383	0.910659811	0.908651112	0.000603086	10514	5.429936514	5.430070216	0.004515216	4.878452418	4.903662335	0.07388929	0.898342815	0.902030732	0.002233176	0.127639338	0.630397565	0.373160612	1.509549143	5.503448169	5.482258134	0.049839991	0.414221737354979	FAUX	0.427652928072868	FAUX	-0.121877285498865	FAUX	-0.0656373913000783	FAUX	1.69693758850625	FAUX	1.03383154171462	FAUX	0.95431913722859	FAUX	0.577636164491847	FAUX	0.539355571219246	FAUX	-0.0467461061131977	FAUX
2Q1C6	hi.EMS	1	12708	5.424214132	5.423546498	0.004561472	4.929291845	4.928639048	0.017991175	0.908705217	0.906602513	0.000392066	16036	5.425743787	5.423763441	0.004571535	4.948364766	4.96248535	0.041033704	0.911945879	0.913415932	0.001146075	0.088114243	0.590359192	0.454955633	1.363039369	5.528456921	5.499533816	0.043574949	2.85991420331077	VRAI	2.32988290123916	FAUX	-1.96992033471768	FAUX	-2.32900797834639	FAUX	0.101238961098567	FAUX	0.0368586210498548	FAUX	1.63421449311718	FAUX	2.87734829637443	VRAI	2.33579905053047	FAUX	-1.91836090985941	FAUX
2Q1C8	lo.sham	1	18293	5.421473676	5.41908629	0.00460279	4.924399672	4.920837862	0.019580873	0.908262592	0.906460122	0.000444898	22058	5.429798822	5.431488405	0.004533871	4.861371347	4.891830048	0.07750202	0.895230048	0.899666624	0.002370586	0.119004443	0.614697615	0.3474178	1.436395319	5.515291887	5.489799631	0.049889089	-0.145422089960396	FAUX	0.0326596826839313	FAUX	0.111716093030965	FAUX	0.176218486232309	FAUX	0.900188993791857	FAUX	1.25801839305853	FAUX	1.25111950590567	FAUX	0.0157676630327429	FAUX	0.177999819112885	FAUX	0.159052656688904	FAUX
2Q1C9	lo.sham	1	12775	5.415487801	5.411973893	0.004668604	4.922393141	4.917439861	0.025254597	0.908890804	0.906874723	0.000631745	11272	5.421043222	5.418960521	0.004498724	4.842946134	4.876794973	0.090334044	0.893275521	0.89765075	0.002823636	0.179116395	0.750621008	0.323322833	1.448830046	5.446778019	5.432426484	0.043569724	-0.496826152927911	FAUX	-0.304150908691401	FAUX	0.881889152800557	FAUX	0.927575630209855	FAUX	1.03562075553964	FAUX	-0.722385395126373	FAUX	-1.00683686293786	FAUX	-0.590315340625235	FAUX	-0.281168457873691	FAUX	0.890027477239256	FAUX
2Q1D1	hi.sham	1	11370	5.41581989	5.412690654	0.004648718	4.948898441	4.946697837	0.019899663	0.913756579	0.911121982	0.000492523	9445	5.421518239	5.419410474	0.004433596	4.885744135	4.920801382	0.093157107	0.901104237	0.906137877	0.002932308	0.175436739	0.730121758	0.300826668	1.378942887	5.451430482	5.437855161	0.052858253	0.910697309382316	FAUX	1.11387138037412	FAUX	1.06662868872657	FAUX	1.09862642371039	FAUX	0.274450762268592	FAUX	-0.651256972664452	FAUX	-0.793187857305578	FAUX	0.817491505170077	FAUX	1.06277874537579	FAUX	1.05084294717816	FAUX
2Q1D10	lo.EMS	1	20762	5.425913106	5.425815345	0.004555169	4.938787348	4.939564177	0.018859515	0.910164131	0.907982186	0.000408025	20790	5.428885952	5.429110859	0.004658061	4.877645053	4.904866954	0.081467172	0.898406045	0.903977286	0.002539326	0.146320346	0.623039923	0.298820649	1.249681555	5.49802654	5.485171114	0.046861695	0.425589847849961	FAUX	0.752881590124207	FAUX	0.398569645851892	FAUX	0.463820350913973	FAUX	-1.13338793966872	FAUX	0.882176702236372	FAUX	1.06896130150298	FAUX	0.55107852283808	FAUX	0.576144402046851	FAUX	0.384927099540232	FAUX
2Q1D11	lo.EMS	1	10628	5.419544443	5.41657061	0.004653766	4.959267435	4.957037109	0.020492631	0.915022026	0.912425737	0.000476714	9647	5.426223982	5.426381116	0.004607683	4.878199928	4.897728781	0.068648753	0.898931659	0.900631146	0.002093788	0.159324142	0.700839639	0.353687377	1.365194731	5.47329401	5.45516018	0.046420933	0.520089895765713	FAUX	0.193811235417167	FAUX	-0.358833211898079	FAUX	-0.318704942537008	FAUX	0.124713901309497	FAUX	0.450659825326372	FAUX	-0.112137925287588	FAUX	0.569330702970519	FAUX	0.35814598186988	FAUX	-0.345272713697665	FAUX
2Q1D12	lo.EMS	1	25612	5.425579423	5.425462484	0.004559467	4.953758933	4.955726224	0.020762536	0.912978188	0.911355222	0.000472272	30575	5.437817472	5.441181218	0.004341629	4.907026314	4.944388894	0.08630956	0.902302286	0.908102345	0.002666242	0.106524939	0.535928046	0.33444358	1.491165853	5.546192417	5.529929301	0.056653495	1.12609432678559	FAUX	1.44209309900233	FAUX	0.614323500953355	FAUX	0.673888858792553	FAUX	1.49671756345702	FAUX	2.79025508868631	VRAI	2.83044796693793	VRAI	1.51755217598601	FAUX	1.7831367910417	FAUX	0.660773193604206	FAUX
2Q1D4	hi.EMS	1	17578	5.418984928	5.416090218	0.004664916	4.92962163	4.926025873	0.020425357	0.909635544	0.90771942	0.000456863	21873	5.428127533	5.429851559	0.00457562	4.881311115	4.901373851	0.068527769	0.899180424	0.901641192	0.002068043	0.137841174	0.670095552	0.36849216	1.426055935	5.489118947	5.468079876	0.045235254	0.564815311031959	FAUX	0.36256890111269	FAUX	-0.402599033383055	FAUX	-0.366358915402783	FAUX	0.787578480468417	FAUX	0.99926631496824	FAUX	0.396324855509879	FAUX	0.671670771544034	FAUX	0.469465713324197	FAUX	-0.352164553807181	FAUX
2Q1D7	lo.sham	1	8913	5.422756544	5.42244866	0.004661423	4.949761774	4.948681871	0.023023711	0.912732665	0.910481046	0.000575346	8317	5.42971058	5.429718375	0.004417462	4.880779515	4.888404168	0.049883926	0.898846643	0.898844327	0.00147957	0.154021883	0.662738968	0.378040883	1.270377116	5.489512802	5.467838879	0.049677127	0.504804884191413	FAUX	-0.104729032511634	FAUX	-1.40298762405029	FAUX	-1.55025661157865	FAUX	-0.907984013503819	FAUX	0.978212631989873	FAUX	0.386840266647751	FAUX	0.65418420437413	FAUX	0.073374107783693	FAUX	-1.41420899755931	FAUX
2Q1D8	lo.sham	1	17658	5.420369441	5.41867906	0.004570447	4.925494616	4.928846301	0.020789812	0.90865133	0.907316172	0.00049157	21557	5.426656365	5.426504755	0.004567842	4.868022022	4.884347816	0.057593816	0.896997086	0.898908276	0.001727499	0.118522986	0.629030013	0.361997498	1.285399074	5.511176734	5.481148699	0.046133817	0.17227335892214	FAUX	-0.0940444855072844	FAUX	-0.981514858272527	FAUX	-1.02708435593253	FAUX	-0.744373647402401	FAUX	0.470204637839579	FAUX	0.910656623403646	FAUX	0.234536427353276	FAUX	-0.0505060962519426	FAUX	-0.975015970861964	FAUX
2Q1D9	lo.sham	1	9509	5.417620251	5.415722694	0.004632312	4.931553995	4.930291746	0.019785317	0.910239242	0.908104009	0.000471214	8300	5.428447256	5.427961366	0.004436201	4.871876014	4.892556491	0.064753869	0.897405401	0.899892665	0.001968938	0.142168675	0.675783133	0.349183711	1.334078009	5.4877526	5.464819539	0.046854635	0.24568424041447	FAUX	0.07042642945733	FAUX	-0.571074921449417	FAUX	-0.552630366350103	FAUX	-0.214191205354763	FAUX	0.700465226324589	FAUX	0.26801223752281	FAUX	0.361310486759462	FAUX	0.200185247561946	FAUX	-0.56714434774109	FAUX
2Q1E1	hi.sham	1	12126	5.415914976	5.411528798	0.004671541	4.956723813	4.952903786	0.02165513	0.915171253	0.912534461	0.000528671	11012	5.424507486	5.424992645	0.004352203	4.886870304	4.916087934	0.084109668	0.900799516	0.905165007	0.002604753	0.171812568	0.738830367	0.339864749	1.494082313	5.451058506	5.440392657	0.049218847	0.85591157479204	FAUX	0.95132505057804	FAUX	0.509793821509204	FAUX	0.572753067667555	FAUX	1.52848193720378	FAUX	0.231170785662095	FAUX	-0.693323102560369	FAUX	0.854535955627526	FAUX	0.918830956832964	FAUX	0.535456590398807	FAUX
2Q1E10	lo.EMS	1	13871	5.419318986	5.415791056	0.004688362	4.933547245	4.929725378	0.020907032	0.910299412	0.907933498	0.000466983	16678	5.419719522	5.416379186	0.004589171	4.833960981	4.85947455	0.080072102	0.891837493	0.895676878	0.002474767	0.140664348	0.644921453	0.341522713	1.426569983	5.499590383	5.464435891	0.051418798	-0.755368952214402	FAUX	-0.633943840005198	FAUX	0.288821047318253	FAUX	0.354948410737069	FAUX	0.79317719013554	FAUX	-1.130441984138	FAUX	0.252913528626933	FAUX	-0.88587493706336	FAUX	-0.81013081992301	FAUX	0.305457092088159	FAUX
2Q1E12	lo.EMS	1	18102	5.42699447	5.428110486	0.004496434	4.962180253	4.96274332	0.018220204	0.914302487	0.91245145	0.00040259	25917	5.442040057	5.447254186	0.004250178	4.862463976	4.898417996	0.077869455	0.893400594	0.898243395	0.002357574	0.068989466	0.52455917	0.370118177	1.584238035	5.563134847	5.537200572	0.04831925	-0.47433930042213	FAUX	-0.205132263217723	FAUX	0.0895960359650299	FAUX	0.153621800609526	FAUX	2.51040524457539	FAUX	3.75026787558051	VRAI	3.11661342103157	VRAI	0.0517088413628659	FAUX	0.379194474413049	FAUX	0.179983550614049	FAUX
2Q1E2	hi.sham	1	13687	5.417795478	5.414990051	0.004631623	4.947420959	4.940277358	0.019632377	0.91312255	0.910814616	0.000433386	15857	5.424771071	5.422548805	0.00455686	4.886358028	4.900022834	0.056164227	0.900673887	0.901917568	0.00165912	0.130415589	0.64709592	0.395196358	1.387426514	5.504486476	5.471607047	0.051002203	0.833324759144801	FAUX	0.408745578822677	FAUX	-1.09775735612924	FAUX	-1.16740063829266	FAUX	0.366849457521092	FAUX	-0.15515063890708	FAUX	0.535138893782002	FAUX	0.83768503635826	FAUX	0.428205915945757	FAUX	-1.05645234931136	FAUX
2Q1E3	hi.sham	1	13827	5.417222769	5.413838525	0.004534908	4.939116287	4.935353568	0.022693309	0.911696188	0.90955674	0.000557603	15288	5.423841407	5.423584983	0.004444543	4.848826473	4.872791219	0.070627052	0.893918689	0.896887267	0.00217511	0.157967033	0.706043956	0.332384655	1.324991114	5.467370652	5.449949464	0.048424479	-0.381191092183945	FAUX	-0.431713028513892	FAUX	-0.220587955156918	FAUX	-0.170071606596201	FAUX	-0.313160342245915	FAUX	0.0086480390207507	FAUX	-0.317208938359853	FAUX	-0.396886177898756	FAUX	-0.403442329181828	FAUX	-0.232579131101503	FAUX
2Q1E4	hi.EMS	1	17231	5.418390182	5.415801882	0.004478378	4.934956631	4.935333412	0.018701091	0.91073482	0.908879313	0.000430982	16536	5.437944663	5.441792507	0.004183827	4.873230479	4.899316998	0.082235342	0.896064984	0.899634637	0.002528562	0.079644412	0.601777939	0.342177043	1.517026842	5.5369657	5.50228438	0.045863283	0.00469090552028597	FAUX	0.0273153206919079	FAUX	0.380271129539432	FAUX	0.445764964402096	FAUX	1.77838030529364	FAUX	2.88688745304057	VRAI	1.74246467332278	FAUX	0.405864555987851	FAUX	0.406649821283441	FAUX	0.428685818188371	FAUX
2Q1E6	hi.EMS	1	18114	5.421675563	5.421083778	0.004639267	4.939044055	4.939124714	0.019799129	0.910930917	0.908891411	0.000452859	17179	5.42497664	5.424205994	0.004497691	4.852376708	4.900787559	0.115389512	0.894356221	0.902014286	0.003664971	0.153268526	0.609756098	0.299046864	1.514703368	5.506137887	5.482317502	0.067099273	-0.302527291439165	FAUX	0.424905143744214	FAUX	2.31213647923528	FAUX	2.17742619890873	FAUX	1.75307438766512	FAUX	0.106817253942109	FAUX	0.95665560229481	FAUX	-0.280103967973045	FAUX	0.451560469256523	FAUX	2.31730942629929	FAUX
2Q1E8	lo.sham	1	16373	5.420103448	5.416627195	0.004530934	4.932819422	4.932220014	0.02058751	0.910045323	0.907991433	0.000480109	19880	5.425635215	5.425141972	0.004467367	4.848994081	4.872834873	0.067663807	0.893645278	0.896879767	0.002059513	0.114637827	0.649949698	0.354613758	1.380091735	5.502565597	5.472755718	0.046372893	-0.430347607422676	FAUX	-0.432966122425166	FAUX	-0.417099808573066	FAUX	-0.382213290757057	FAUX	0.286963341645719	FAUX	0.25477634877859	FAUX	0.580345565121752	FAUX	-0.391372843530406	FAUX	-0.40210914448113	FAUX	-0.401380053085574	FAUX
2Q1E9	lo.sham	1	13139	5.416431773	5.411589405	0.004618467	4.934513301	4.929761117	0.023866296	0.910975091	0.908637042	0.000586254	12889	5.423272994	5.421719888	0.004494747	4.862061911	4.886871271	0.075216894	0.896435318	0.899908773	0.002302856	0.173946776	0.737062612	0.351471762	1.437790188	5.451201562	5.43864992	0.043914881	0.0712731897532503	FAUX	0.0731177410204026	FAUX	-0.00342312193028533	FAUX	0.0579087707422626	FAUX	0.91538108977252	FAUX	-0.286185566025691	FAUX	-0.761909615835836	FAUX	0.0384832269362695	FAUX	0.0265597304501746	FAUX	0.0288807081494577	FAUX
2Q1F10	lo.EMS	1	16454	5.420377778	5.418992793	0.004512942	4.948307829	4.949577835	0.019059441	0.912859906	0.911031012	0.000433448	16863	5.423910521	5.422297586	0.004424837	4.87918359	4.916911691	0.086847261	0.899500136	0.905414483	0.002726093	0.119966791	0.642946095	0.306835366	1.359361162	5.505622361	5.471781483	0.04989915	0.622296274855677	FAUX	0.993007298126231	FAUX	0.716068623567348	FAUX	0.771216461585685	FAUX	0.0611780852881826	FAUX	-0.194863255919167	FAUX	0.542003932528361	FAUX	0.601687496867252	FAUX	0.943988335984424	FAUX	0.691403271289904	FAUX
2Q1F11	lo.EMS	1	17177	5.418440992	5.416207661	0.004630524	4.948590014	4.947159137	0.018846403	0.913239881	0.91115294	0.000426937	12969	5.422274021	5.420386527	0.004678067	4.845402322	4.867261193	0.076092558	0.893541172	0.897162682	0.002360127	0.161461948	0.696352841	0.32995954	1.330756421	5.472144478	5.449933283	0.042920168	-0.449064806714011	FAUX	-0.385696913903723	FAUX	0.0939360686801649	FAUX	0.158060257279294	FAUX	-0.250367995938125	FAUX	-0.496962834989769	FAUX	-0.317845751815546	FAUX	-0.509520953033153	FAUX	-0.572328251607279	FAUX	0.0787628105568723	FAUX
2Q1F12	lo.EMS	1	24730	5.424386535	5.424893065	0.004639113	4.959118506	4.95947547	0.02059379	0.914170205	0.912123575	0.000466413	28705	5.440384304	5.445708484	0.004552941	4.782982808	4.825821931	0.099345179	0.879057502	0.88609699	0.003084009	0.096777565	0.534401672	0.334221431	1.561211229	5.542948572	5.53310193	0.048212251	-3.05308126935729	VRAI	-2.23454374981582	FAUX	1.32451639061402	FAUX	1.33218938420778	FAUX	2.25961076360252	FAUX	3.5059238110756	VRAI	2.95530878129289	VRAI	-2.56276215746267	FAUX	-1.83787528294135	FAUX	1.40334578069474	FAUX
2Q1F3	hi.sham	1	10275	5.417383657	5.413697824	0.004781717	4.960770385	4.955697366	0.022164549	0.91567023	0.913247309	0.000538656	9736	5.423215789	5.419950795	0.004620578	4.881315616	4.906991914	0.080160277	0.899995691	0.903365154	0.002472304	0.177280197	0.691762531	0.341397947	1.421976368	5.462513237	5.449903229	0.054673106	0.711392020488182	FAUX	0.650607072510602	FAUX	0.284634012231149	FAUX	0.35076686632624	FAUX	0.743146226669994	FAUX	-0.565843206442185	FAUX	-0.319028545931907	FAUX	0.671818828426721	FAUX	0.641040268669749	FAUX	0.310479971160239	FAUX
2Q1F4	hi.EMS	1	22866	5.423176812	5.4229721	0.004568831	4.949133668	4.949033641	0.019394781	0.912534856	0.910617439	0.000433329	17037	5.430793635	5.430516869	0.004390663	4.939186125	4.97339574	0.092048321	0.909392117	0.914221569	0.00286287	0.101426307	0.577625169	0.324044176	1.483703403	5.538343555	5.506557794	0.056652701	2.40077378588392	FAUX	2.46448807715979	FAUX	0.94858591878003	FAUX	0.989703831629016	FAUX	1.41544092984417	FAUX	1.1044383012603	FAUX	1.91064757529964	FAUX	2.57542406316322	FAUX	2.66900024690306	VRAI	0.987681075958257	FAUX
2Q1F6	hi.EMS	1	11982	5.421466376	5.419741025	0.004648465	4.947607589	4.950496291	0.021978073	0.912541257	0.910804667	0.000518591	15441	5.433140462	5.435087512	0.004472925	4.8996735	4.91546843	0.053086814	0.901743298	0.903217975	0.001557868	0.097662069	0.587461952	0.39383922	1.35680203	5.535794284	5.504988445	0.047899549	1.02559397332407	FAUX	0.62601652467477	FAUX	-1.26988308761096	FAUX	-1.38059663614428	FAUX	0.0333055187810856	FAUX	1.82696404556326	FAUX	1.84888485606991	FAUX	1.27568709716935	FAUX	0.899911424721123	FAUX	-1.23175683872272	FAUX
2Q1F7	lo.sham	1	13037	5.417738103	5.414192587	0.00460802	4.940737722	4.933623932	0.021871356	0.911902718	0.909204526	0.000519535	12703	5.419805816	5.418058383	0.004485975	4.84697626	4.874731074	0.085924022	0.894235499	0.898123977	0.002691729	0.195308195	0.775643549	0.313166915	1.37058119	5.437532919	5.42363247	0.041576721	-0.324231878425977	FAUX	-0.225084525710734	FAUX	0.657650729237975	FAUX	0.715467101307456	FAUX	0.183380057144858	FAUX	-0.86499507387701	FAUX	-1.35293082775031	FAUX	-0.457747490733891	FAUX	-0.344199533389076	FAUX	0.638811064296675	FAUX
[truncated: 1,489 more rows]
[truncated: 22 more columns]
