# Supplementary material for: Mutational sources of trans-regulatory variation affecting gene expression in Saccharomyces cerevisiae
Source: eLife. 2021 Aug 31;10:e67806. doi: 10.7554/eLife.67806 (PMC8456550; doi:10.7554/eLife.67806)
Supplement: Supplementary file 12. [file elife-67806-supp12.bz2 › Input_Files/Fitness/Time.Points.txt]

ENVIRONMENT	PLATE	T1T2
GLUCOSE	1	625
GLUCOSE	2	623
GLUCOSE	3	596
GLUCOSE	4	588
GLYCEROL	1	2108
GLYCEROL	2	NA
GLYCEROL	3	2045
GLYCEROL	4	2038
