# Supplementary material for: Mutational sources of trans-regulatory variation affecting gene expression in Saccharomyces cerevisiae
Source: eLife. 2021 Aug 31;10:e67806. doi: 10.7554/eLife.67806 (PMC8456550; doi:10.7554/eLife.67806)
Supplement: Supplementary file 12. [file elife-67806-supp12.bz2 › Input_Files/Gene.List.txt]

GENE	SHORT	CHR	START	STOP	DIRECTION	ORIENTATION	LENGTH.CIS	N.TRANS.FACTORS	LENGTH.CDS
YDR039C	ENA2;PMR2B	chr04	531307	534582	-	HT	610	34	3276
YBR115C	LYS2	chr02	469748	473926	-	HT	466	16	4179
YCR096C	HMRA2	chr03	293179	293538	-	HH	297	44	360
YHR214C-D	YHR214C-D	chr08	550648	550941	-	HT	259	2	294
YLR157C	ASP3-2	chr12	472969	474057	-	HH	1707	54	1089
YLR158C	ASP3-3	chr12	482549	483637	-	HH	1708	47	1089
YLR160C	ASP3-4	chr12	486201	487289	-	HH	1708	43	1089
YCR039C	MATALPHA2;ALPHA-2;MAT2A;MATAL2	chr03	199546	200178	-	HH	264	41	633
YHR213W-A	YHR213W-A	chr08	540549	540782	+	HT	802	3	234
YCL069W	VBA3	chr03	9706	11082	+	HH	1380	22	1377
YLR157W-E	YLR157W-E	chr12	481873	482037	+	HT	5897	2	165
YLR156C-A	YLR156C-A	chr12	472479	472610	-	HT	359	0	132
YLR159W	YLR159W;L9632.4	chr12	485345	485689	+	HH	1708	53	345
YAL067W-A	YAL067W-A	chr01	2480	2707	+	HH	311	3	228
YHR053C	CUP1-1;MTH1	chr08	212535	212720	-	HT	465	127	186
YHR055C	CUP1-2;MTH1	chr08	214533	214718	-	HT	465	118	186
YOR394C-A	YOR394C-A	chr15	1084202	1084369	-	HH	1104	2	168
YPL281C	ERR2	chr16	9557	10870	-	HH	1017	61	1314
YPL280W	HSP32	chr16	11887	12600	+	HH	1017	49	714
YOR393W	ERR1	chr15	1080276	1081589	+	HH	1018	54	1314
YJL221C	IMA4;FSP2	chr10	16767	18536	-	HH	961	36	1770
YPL282C	PAU22	chr16	7933	8427	-	HT	1130	31	495
YLR461W	PAU4	chr12	1062919	1063281	+	HH	2032	73	363
YNL067W-B	YNL067W-B;YNL067W-A	chr14	499417	499557	+	HH	1128	8	141
YLR157W-D	YLR157W-D	chr12	475764	475976	+	HH	1707	0	213
YLR157C-C	YLR157C-C	chr12	482059	482190	-	HT	359	0	132
YIL172C	IMA3	chr09	16784	18553	-	HT	4566	50	1770
YOR192C-C	YOR192C-C	chr15	703988	704224	-	HH	6222	4	237
YDL246C	SOR2	chr04	8683	9756	-	HT	1901	35	1074
YHR212W-A	YHR212W-A	chr08	538742	538945	+	HT	10123	7	204
YHR213W	YHR213W	chr08	539151	539747	+	HT	206	33	597
YNL335W	DDI3	chr14	11452	12129	+	HT	1977	40	678
YLR159C-A	YLR159C-A	chr12	485711	485842	-	HT	359	1	132
YPL283C	YRF1-7	chr16	280	6007	-	HT	1926	83	5580
YOL155W-A	YOL155W-A;NOL049W	chr15	27084	27218	+	HT	108	5	135
YOR394W	PAU21	chr15	1082718	1083212	+	HT	1129	44	495
YML132W	COS3	chr13	7244	8383	+	HH	2560	56	1140
YLL064C	PAU18	chr12	13083	13445	-	HT	1203	38	363
YHL049C	YHL049C	chr08	3726	4541	-	HT	1122	43	816
YCL073C	GEX1	chr03	6479	8326	-	HH	1380	16	1848
YBR302C	COS2	chr02	810340	811479	-	HT	0	40	1140
YIR041W	PAU15	chr09	433929	434303	+	HH	1818	23	375
YEL075C	YEL075C	chr05	5345	5713	-	HT	1517	23	369
YJL225C	YJL225C;HRF393/HRD1054;HRF393/HRD732;J0202	chr10	466	6130	-	HT	2646	42	5277
YPR204W	YPR204W	chr16	944603	947701	+	HT	415	6	3099
YLL066C	YLL066C;L0519;L0532	chr12	6120	9836	-	HT	3247	47	3618
YIL177C	YIL177C	chr09	483	6147	-	HT	2646	38	5277
YIL176C	PAU14	chr09	8793	9155	-	HH	2337	57	363
YFL068W	YFL068W	chr06	53	535	+	HT	0	85	483
YNL339C	YRF1-6	chr14	371	6098	-	HH	2232	76	5580
YNR076W	PAU6	chr14	781918	782280	+	HH	315	63	363
YOR396W	YRF1-8	chr15	1085473	1090863	+	HH	1104	5	5391
YGR296W	YRF1-3	chr07	1084864	1090591	+	HH	2135	70	5580
YLR467W	YRF1-5	chr12	1072508	1077898	+	HH	798	64	5391
YDR542W	PAU10	chr04	1523249	1523611	+	HH	2551	57	363
YDR545W	YRF1-1	chr04	1526321	1531711	+	HT	2710	44	5391
YAL064W	YAL064W	chr01	21566	21850	+	HH	7823	31	285
YHR219W	YHR219W	chr08	560173	562047	+	HT	249	76	1875
YEL021W	URA3	chr05	116167	116970	+	HT	367	59	804
YER190C-B	YER190C-B	chr05	575680	576162	-	HT	0	0	483
YLL066W-B	YLL066W-B	chr12	5605	5775	+	HH	1304	7	171
YJL223C	PAU1	chr10	8776	9138	-	HH	2337	60	363
YOL161C	PAU20	chr15	11549	11911	-	HT	3322	49	363
YJR158W	HXT16	chr10	732440	734143	+	HH	2844	63	1704
YFL058W	THI5	chr06	12929	13951	+	HT	670	26	1023
YAL068C	PAU8	chr01	1807	2169	-	HH	311	53	363
YAR066W	YAR066W	chr01	222727	223338	+	HT	552	32	612
YBL112C	YBL112C	chr02	2582	2899	-	HT	8	40	318
YBL111C	YBL111C	chr02	2907	5009	-	HT	2596	45	2004
YBL108C-A	PAU9	chr02	7605	7733	-	HT	2228	12	129
YBR072C-A	YBR072C-A	chr02	382860	383021	-	HH	91	0	162
YBR200W-A	YBR200W-A	chr02	622983	623147	+	HT	456	0	165
YCL067C	HMLALPHA2	chr03	12386	13018	-	HH	264	39	633
YCL066W	HMLALPHA1	chr03	13282	13809	+	HH	264	63	528
YCR040W	MATALPHA1;ALPHA-1;MAT1A;MATAL1	chr03	200442	200969	+	HH	264	64	528
YCR108C	YCR108C	chr03	315997	316188	-	HT	0	5	192
YDL007C-A	YDL007C-A	chr04	436567	436824	-	HH	1223	0	258
YEL076C	YEL076C	chr05	4464	5114	-	HT	231	21	651
YER189W	YER189W	chr05	571155	571523	+	HH	1248	36	369
YFL064C	YFL064C	chr06	3322	3846	-	HH	2580	38	525
YGL260W	YGL260W;NRB76	chr07	6860	7090	+	HH	208	17	231
YHL048C-A	YHL048C-A	chr08	5663	5797	-	HH	604	7	135
YHR214C-E	YHR214C-E	chr08	551200	551499	-	HH	600	2	300
YHR218W	YHR218W	chr08	558014	559924	+	HT	2047	25	1812
YJL052C-A	YJL052C-A	chr10	337884	338003	-	HH	268	6	120
YJR151W-A	YJR151W-A	chr10	717580	717630	+	HH	1840	3	51
YJR159W	SOR1;SDH1	chr10	736044	737117	+	HT	1901	82	1074
YLR013W	GAT3	chr12	171339	171764	+	HH	1058	20	426
YLR154W-C	TAR1;ART1	chr12	454696	455070	+	HH	6382	4	375
YLR154C-G	YLR154C-G;smORF421	chr12	462522	462671	-	HT	6156	5	150
YLR154C-H	YLR154C-H;smORF494;SR15	chr12	468827	468958	-	HT	359	4	132
YLR155C	ASP3-1	chr12	469317	470405	-	HH	1708	57	1089
YLR156W	YLR156W;L9632.3	chr12	472113	472457	+	HH	1708	55	345
YLR161W	YLR161W;L9632.5	chr12	488997	489341	+	HH	1708	57	345
YLR462W	YLR462W	chr12	1065956	1066564	+	HT	2675	51	609
YMR325W	PAU19	chr13	922641	923015	+	HT	1240	37	375
YNR077C	YNR077C;N3830	chr14	783287	783541	-	HT	0	23	255
YOL166W-A	YOL166W-A	chr15	585	740	+	HT	0	4	156
YOL019W-A	YOL019W-A	chr15	288420	288572	+	HT	470	5	153
YOR072W-B	YOR072W-B	chr15	464469	464630	+	HH	3193	4	162
YPR108W-A	YPR108W-A	chr16	744175	744387	+	HT	432	3	213
YCL068C	YCL068C;YCL68C	chr03	11503	12285	-	HT	101	13	783
YAR068W	YAR068W	chr01	224084	224569	+	HT	746	69	486
YFR057W	YFR057W	chr06	269061	269516	+	HT	3835	25	456
YOR391C	HSP33	chr15	1078545	1079258	-	HH	1018	39	714
YHL046C	PAU13	chr08	11923	12285	-	HH	1280	33	363
YOL165C	AAD15	chr15	1647	2078	-	HH	2052	40	432
YMR323W	ERR3	chr13	920088	921401	+	HH	1009	58	1314
YER188C-A	YER188C-A	chr05	569608	569907	-	HH	1248	13	300
YMR322C	SNO4	chr13	918366	919079	-	HH	1009	45	714
YBR301W	PAU24;DAN3	chr02	809057	809419	+	HT	1952	35	363
YLL067C	YLL067C;L0111;L0503;L0509	chr12	585	4301	-	HH	1304	51	3618
YFL066C	YFL066C	chr06	1437	2615	-	HT	415	25	1179
YKL224C	PAU16	chr11	1810	2181	-	HT	1322	27	372
YGL261C	PAU11	chr07	6290	6652	-	HH	208	35	363
YLR012C	YLR012C	chr12	169982	170281	-	HH	1058	27	300
YLR162W	YLR162W	chr12	489573	489929	+	HT	232	32	357
YPL187W	MF(ALPHA)1;MF-ALPHA-1;MFAL1	chr16	193648	194145	+	HT	998	82	498
YDL247W	MPH2	chr04	5985	7814	+	HT	3032	25	1830
YDR194W-A	YDR194W-A;smORF123	chr04	848071	848223	+	HH	125	0	153
YFL061W	DDI2	chr06	9545	10222	+	HT	1980	16	678
YGL138C	YGL138C;G2816	chr07	248494	249531	-	HH	338	23	1038
YOR388C	FDH1	chr15	1071793	1072923	-	HH	1290	42	1131
YDR374C	PHO92;MRB1	chr04	1223474	1224394	-	HH	363	0	921
YEL035C	UTR5	chr05	85045	85545	-	HH	131	24	501
YDL114W	YDL114W	chr04	255604	256530	+	HH	478	23	927
YLR406C-A	YLR406C-A	chr12	932206	932355	-	HH	612	6	150
YFL060C	SNO3	chr06	10301	10969	-	HH	394	29	669
YJR150C	DAN1;CCW13	chr10	708811	709707	-	HT	2548	54	897
YJR156C	THI11	chr10	728574	729596	-	HH	2844	54	1023
YAR035C-A	YAR035C-A	chr01	192337	192417	-	HH	202	3	81
YDR034C-A	YDR034C-A	chr04	520516	520692	-	HH	622	51	177
YFL062W	COS4	chr06	6426	7565	+	HH	2580	47	1140
YHR086W-A	YHR086W-A	chr08	280231	280392	+	HT	507	1	162
YHR185C	PFS1;ADY1	chr08	474627	475340	-	HT	659	22	714
YKL106C-A	YKL106C-A	chr11	237147	237266	-	HH	270	3	120
YLR162W-A	RRT15	chr12	490406	490594	+	HT	477	11	189
YLR464W	YLR464W	chr12	1066572	1067501	+	HT	8	34	651
YMR175W-A	YMR175W-A	chr13	611314	611508	+	HT	59	0	195
YOR255W	OSW1	chr15	807271	808107	+	HH	248	36	837
YPL152W-A	YPL152W-A	chr16	264602	264700	+	HH	410	0	99
YPR159C-A	YPR159C-A	chr16	860314	860415	-	HH	891	5	102
YOL131W	YOL131W	chr15	73031	73357	+	HT	316	21	327
YER085C	YER085C	chr05	327619	328140	-	HH	337	20	522
YGL262W	YGL262W;NRB175	chr07	5312	5839	+	HT	1380	21	528
YDL244W	THI13	chr04	16204	17226	+	HH	2844	31	1023
YNL332W	THI12	chr14	14832	15854	+	HT	669	54	1023
YAL018C	YAL018C;YAL003	chr01	118564	119541	-	HH	684	34	978
YBR298C-A	YBR298C-A	chr02	805035	805256	-	HH	95	2	222
YCR104W	PAU3	chr03	307801	308175	+	HH	2334	59	375
YHR022C-A	YHR022C-A	chr08	151217	151306	-	HH	360	5	90
YHR126C	ANS1	chr08	359702	360181	-	HH	732	30	480
YML047C	PRM6	chr13	180017	181075	-	HH	399	29	1059
YPL278C	YPL278C	chr16	15053	15355	-	HT	50	38	303
YPL021W	ECM23;SRD2	chr16	511101	511664	+	HT	1102	30	564
YAL063C-A	YAL063C-A	chr01	22395	22685	-	HT	1315	5	291
YHR213W-B	YHR213W-B	chr08	540800	541099	+	HT	18	5	300
YNL277W-A	YNL277W-A	chr14	116679	116867	+	HT	226	8	189
YBR182C-A	YBR182C-A	chr02	595361	595555	-	HH	560	5	195
YER078W-A	YER078W-A	chr05	318646	318810	+	HH	304	3	165
YKR034W	DAL80;UGA43	chr11	506898	507707	+	HH	503	27	810
YCL048W-A	YCL048W-A	chr03	41488	41727	+	HH	764	0	240
YLR307W	CDA1	chr12	745620	746525	+	HT	769	33	906
YBR296C-A	YBR296C-A	chr02	800123	800242	-	HH	281	3	120
YGR273C	YGR273C;G9371	chr07	1038715	1039239	-	HT	656	19	525
YLR307C-A	YLR307C-A	chr12	746848	747111	-	HH	826	2	264
YOR011W-A	YOR011W-A	chr15	355652	355858	+	HT	1789	0	207
YOL024W	YOL024W	chr15	277086	277604	+	HT	147	33	519
YNR073C	YNR073C;N3810	chr14	774792	776300	-	HT	1302	37	1509
YIL134C-A	YIL134C-A	chr09	96522	96725	-	HH	670	1	204
YML007C-A	YML007C-A	chr13	253162	253272	-	HH	576	7	111
YLR308W	CDA2	chr12	747937	748875	+	HH	826	26	939
YOL164W-A	YOL164W-A	chr15	4130	4312	+	HH	2052	5	183
YOR381W-A	YOR381W-A	chr15	1058423	1058590	+	HT	743	3	168
YOL162W	YOL162W;O0235	chr15	10119	10766	+	HT	13	36	648
YGR294W	PAU12	chr07	1080306	1080668	+	HT	1953	63	363
YJL028W	YJL028W;J1267	chr10	391311	391646	+	HH	458	12	336
YIL102C	YIL102C	chr09	174582	174887	-	HT	420	38	306
YJL136W-A	YJL136W-A	chr10	156169	156252	+	HH	42	1	84
YJR160C	MPH3	chr10	738008	739816	-	HT	3032	13	1809
YMR175W	SIP18	chr13	611016	611255	+	HH	651	36	240
YNL042W-B	YNL042W-B	chr14	547113	547370	+	HT	1236	3	258
YOR214C	YOR214C;YO50-4	chr15	745593	746303	-	HT	422	29	711
YPL033C	SRL4	chr16	487362	488207	-	HT	680	24	846
YFL011W	HXT10	chr06	112345	113985	+	HT	1252	39	1641
YHR214W	YHR214W	chr08	541651	542262	+	HT	552	51	612
YMR321C	YMR321C;YM9924.13C	chr13	917579	917896	-	HT	470	61	318
YBL044W	YBL044W;YBL0404	chr02	135998	136366	+	HH	482	31	369
YFL020C	PAU5	chr06	99231	99599	-	HT	2029	33	369
YFL012W	YFL012W	chr06	110647	111093	+	HH	717	32	447
YHR079C-A	SAE3	chr08	262192	262553	-	HT	248	18	276
YLR466C-B	YLR466C-B	chr12	1071594	1071710	-	HH	798	5	117
YMR272W-B	YMR272W-B	chr13	811089	811196	+	HH	312	2	108
YIR013C	GAT4	chr09	380019	380384	-	HH	702	21	366
YGL259W	YPS5	chr07	8470	8967	+	HT	1380	28	498
YML133C	YML133C;YM4987.01C;YM4987.02C	chr13	461	4684	-	HH	2560	48	4125
YNL334C	SNO2	chr14	12208	12876	-	HH	391	33	669
YJL222W	VTH2	chr10	11475	16124	+	HH	2337	33	4650
YIL173W	VTH1	chr09	11492	16141	+	HH	2337	26	4650
YNL033W	YNL033W;N2743	chr14	572999	573853	+	HT	684	38	855
YEL070W	DSF1	chr05	19589	21097	+	HT	1744	39	1509
YDR014W-A	HED1	chr04	477797	478285	+	HT	1808	0	489
YGR121W-A	YGR121W-A	chr07	733412	733627	+	HH	485	4	216
YJL037W	IRC18	chr10	376662	377336	+	HH	888	17	675
YLR445W	GMC2	chr12	1024189	1024837	+	HT	218	19	567
YOR161C-C	YOR161C-C	chr15	639121	639267	-	HT	293	6	147
YPL130W	SPO19	chr16	304387	305058	+	HT	373	32	672
YOL013W-A	YOL013W-A	chr15	301047	301238	+	HT	980	41	192
YDL245C	HXT15	chr04	11657	13360	-	HH	2844	31	1704
YJL219W	HXT9	chr10	19497	21200	+	HH	961	46	1704
YGL033W	HOP2	chr07	435625	436351	+	HH	2563	23	657
YML100W-A	YML100W-A	chr13	70138	70311	+	HH	50	18	174
YIL057C	RGI2	chr09	247902	248396	-	HH	1595	49	495
YFR012W-A	YFR012W-A	chr06	169224	169310	+	HT	728	1	87
YOR183W	FYV12	chr15	678872	679261	+	HH	79	24	390
YJR005C-A	YJR005C-A	chr10	448477	448758	-	HH	444	2	282
YFL059W	SNZ3	chr06	11363	12259	+	HH	394	54	897
YIL046W-A	YIL046W-A	chr09	268309	268473	+	HH	486	9	165
YMR315W-A	YMR315W-A	chr13	904286	904393	+	HT	437	3	108
YNL318C	HXT14;HXT9	chr14	38707	40329	-	HH	290	66	1623
YMR244W	YMR244W;YM9408.06	chr13	757250	758317	+	HH	1084	26	1068
YGR292W	MAL12;MAL1S	chr07	1076599	1078353	+	HH	786	32	1755
YNL269W	BSC4	chr14	137699	138094	+	HH	38	18	396
YBR299W	MAL32;MAL3S	chr02	805351	807105	+	HH	95	35	1755
YBL071C-B	YBL071C-B	chr02	89458	89556	-	HH	422	6	99
YGR087C	PDC6	chr07	651290	652981	-	HH	1653	53	1692
YGL006W-A	YGL006W-A	chr07	485423	485533	+	HH	2396	17	111
YMR158C-A	YMR158C-A	chr13	573194	573331	-	HT	1145	2	138
YAR064W	YAR064W	chr01	221876	222175	+	HT	12182	48	300
YBR040W	FIG1	chr02	316968	317864	+	HT	458	41	897
YBR221W-A	YBR221W-A	chr02	666538	666642	+	HH	285	0	105
YPL038W-A	YPL038W-A	chr16	480182	480373	+	HT	7	0	192
YFL067W	YFL067W	chr06	836	1363	+	HT	301	64	528
YNL333W	SNZ2	chr14	13267	14163	+	HH	391	57	897
YAL065C	YAL065C	chr01	11565	11951	-	HH	95	28	387
YCL048W	SPS22	chr03	42165	43556	+	HT	438	33	1392
YGL258W-A	YGL258W-A	chr07	9162	9395	+	HT	195	8	234
YGR174W-A	YGR174W-A	chr07	846655	846741	+	HH	250	5	87
YLR412C-A	YLR412C-A	chr12	950267	950473	-	HH	683	8	207
YOL157C	IMA2	chr15	22525	24294	-	HH	979	55	1770
YPR202W	YPR202W;P9677.1	chr16	943032	943896	+	HT	1896	27	717
YOR186W	YOR186W	chr15	683111	683545	+	HH	1005	28	435
YMR017W	SPO20	chr13	307489	308682	+	HH	1896	77	1194
YDR218C	SPR28	chr04	903781	905052	-	HT	403	21	1272
YPL027W	SMA1	chr16	499665	500402	+	HT	373	21	738
YGL230C	YGL230C	chr07	63772	64215	-	HT	288	29	444
YGL007C-A	YGL007C-A	chr07	482941	483027	-	HH	2396	22	87
YGR236C	SPG1	chr07	962530	962817	-	HT	481	27	288
YLL046C	RNP1	chr12	46714	47463	-	HT	396	28	750
YAL064W-B	YAL064W-B	chr01	12046	12426	+	HH	95	16	381
YOL163W	YOL163W;O0230	chr15	9597	10106	+	HT	1482	34	510
YLL006W-A	YLL006W-A	chr12	136345	136521	+	HH	46	3	177
YPL121C	MEI5	chr16	320962	321630	-	HH	441	20	669
YNL019C	YNL019C;N2827	chr14	598376	599230	-	HT	706	22	855
YJL027C	YJL027C;J1269	chr10	391833	392249	-	HH	155	22	417
YNL130C-A	DGR1	chr14	381245	381391	-	HH	89	3	147
YER106W	MAM1	chr05	372326	373234	+	HH	313	20	909
YCL026C-A	FRM2	chr03	74704	75285	-	HT	733	31	582
YFR023W	PES4	chr06	199874	201709	+	HT	840	30	1836
YEL049W	PAU2	chr05	63728	64090	+	HH	2877	27	363
YOR316C-A	YOR316C-A	chr15	907726	907935	-	HH	1408	8	210
YNR075C-A	YNR075C-A	chr14	781511	781603	-	HH	315	3	93
YDL159W-A	YDL159W-A;YDL159W-B	chr04	172182	172313	+	HH	252	7	132
YDR182W-A	YDR182W-A;smORF121;SR1	chr04	829151	829354	+	HT	94	4	204
YBL008W-A	YBL008W-A	chr02	209409	209648	+	HT	185	0	240
YFR032C	RRT5	chr06	222090	222959	-	HT	299	27	870
YKL065W-A	YKL065W-A	chr11	315954	316175	+	HT	681	0	222
YMR242W-A	YMR242W-A	chr13	754297	754386	+	HH	77	4	90
YPR151C	SUE1	chr16	831055	831675	-	HT	386	33	621
YMR247W-A	YMR247W-A	chr13	769283	769426	+	HH	1244	3	144
YDR246W-A	YDR246W-A;smORF127	chr04	955133	955333	+	HT	186	7	201
YHR157W	REC104	chr08	412907	413455	+	HH	501	31	549
YKL221W	MCH2	chr11	6107	7528	+	HH	487	30	1422
YCR095W-A	YCR095W-A	chr03	289639	289797	+	HH	381	0	159
YOR032W-A	YOR032W-A	chr15	392176	392376	+	HH	1101	14	201
YMR182W-A	YMR182W-A	chr13	625811	625897	+	HH	644	5	87
YOL156W	HXT11;LGT3	chr15	25273	26976	+	HH	979	72	1704
YBL100W-C	YBL100W-C;YBL101W-C	chr02	28427	28546	+	HH	128	1	120
YKL178C	STE3	chr11	113215	114627	-	HT	873	64	1413
YLL025W	PAU17	chr12	94747	95121	+	HT	3398	27	375
YDR446W	ECM11	chr04	1353725	1354633	+	HT	1372	20	909
YMR030W-A	YMR030W-A	chr13	337313	337603	+	HT	6	2	291
YER039C-A	YER039C-A	chr05	229263	229481	-	HH	314	13	219
YGL015C	YGL015C;YGL026	chr07	465043	465435	-	HH	706	17	393
YEL073C	YEL073C	chr05	7230	7553	-	HH	6167	38	324
YCL001W-A	YCL001W-A	chr03	113080	113541	+	HT	598	13	462
YNL034W	YNL034W;N2740	chr14	570477	572315	+	HH	786	36	1839
YAR020C	PAU7	chr01	176856	177023	-	HT	2258	33	168
YML083C	YML083C	chr13	99794	101050	-	HH	812	41	1257
YOR339C	UBC11	chr15	958362	958832	-	HT	370	30	471
YMR107W	SPG4	chr13	483014	483361	+	HH	2824	52	348
YBR250W	SPO23	chr02	719033	720604	+	HH	1039	29	1572
YKL107W	YKL107W;YKL462	chr11	236141	237070	+	HT	354	30	930
YEL059C-A	SOM1	chr05	42400	42624	-	HH	628	34	225
YIR032C	DAL3	chr09	415030	415617	-	HH	507	29	588
YHR054C	YHR054C	chr08	213185	214249	-	HT	284	30	1065
YPR096C	YPR096C;P9513.17C	chr16	724842	725144	-	HH	250	12	303
YPR193C	HPA2	chr16	922909	923379	-	HT	925	16	471
YPR078C	YPR078C	chr16	697147	698265	-	HH	604	23	1119
YOL038C-A	YOL038C-A	chr15	254926	255021	-	HH	316	6	96
YPR007C	REC8;SPO69	chr16	569336	571378	-	HH	1640	16	2043
YHL015W-A	YHL015W-A	chr08	74699	74782	+	HH	455	8	84
YPR200C	ARR2;ACR2	chr16	939279	939671	-	HH	251	18	393
YJR108W	ABM1	chr10	628712	629083	+	HT	386	32	372
YDR169C-A	YDR169C-A;smORF118;SR2	chr04	794574	794723	-	HT	1470	7	150
YAL064C-A	TDA8	chr01	13363	13743	-	HH	7823	28	381
YOR008C-A	YOR008C-A	chr15	342857	343081	-	HH	1254	31	225
YLR346C	YLR346C	chr12	822287	822592	-	HT	1236	41	306
YCR102C	YCR102C	chr03	304361	305467	-	HH	2334	50	1107
YGL263W	COS12	chr07	2790	3932	+	HT	0	46	1143
YPL223C	GRE1	chr16	128632	129138	-	HH	1024	49	507
YJL045W	YJL045W;J1194	chr10	356024	357928	+	HT	2409	33	1905
YEL069C	HXT13;HXT8	chr05	21537	23231	-	HT	2958	49	1695
YPL200W	CSM4	chr16	171484	171954	+	HH	329	22	471
YER121W	YER121W	chr05	402375	402719	+	HT	506	18	345
YMR174C	PAI3	chr13	610159	610365	-	HH	651	40	207
YGR225W	AMA1;SPO70	chr07	945145	947019	+	HT	498	14	1782
YOR293C-A	YOR293C-A	chr15	867998	868147	-	HH	193	0	150
YOL097W-A	YOL097W-A;NOL020W	chr15	136220	136405	+	HH	382	3	186
YAR071W	PHO11	chr01	227138	228541	+	HT	2569	118	1404
YKR106W	GEX2	chr11	661442	663289	+	HH	978	35	1848
YJR078W	BNA2	chr10	578860	580221	+	HH	670	42	1362
YJL160C	PIR5	chr10	117962	118825	-	HH	1624	0	864
YAL067C	SEO1	chr01	7235	9016	-	HT	2549	46	1782
YGR144W	THI4;ESP35;MOL1	chr07	780399	781379	+	HT	2891	40	981
YJR095W	SFC1;ACR1	chr10	609773	610741	+	HT	915	42	969
YMR101C	SRT1	chr13	468445	469476	-	HT	372	32	1032
YIR021W-A	YIR021W-A	chr09	398514	398726	+	HT	129	3	213
YER175W-A	YER175W-A	chr05	540650	540814	+	HH	287	4	165
YFL041W-A	YFL041W-A	chr06	48734	48925	+	HH	990	5	192
YGR146C-A	YGR146C-A	chr07	785276	785437	-	HT	617	8	162
YGR059W	SPR3	chr07	607563	609101	+	HT	420	28	1539
YNR072W	HXT17	chr14	772657	774351	+	HH	1189	68	1695
YNL018C	YNL018C;N2831	chr14	599936	601774	-	HH	1133	24	1839
YJL047C-A	YJL047C-A	chr10	349044	349178	-	HT	402	8	135
YER138W-A	YER138W-A	chr05	449474	449578	+	HH	7655	69	105
YML054C-A	YML054C-A	chr13	167623	167781	-	HT	1335	2	159
YGL258W	VEL1	chr07	11110	11730	+	HT	1715	26	621
YFL051C	YFL051C	chr06	30058	30540	-	HT	2732	31	483
YDR523C	SPS1	chr04	1485566	1487038	-	HT	504	31	1473
YOR100C	CRC1	chr15	513295	514278	-	HH	966	37	984
YIR027C	DAL1	chr09	406260	407642	-	HH	826	32	1383
YDR402C	DIT2;CYP56	chr04	1272234	1273703	-	HH	899	26	1470
YNR071C	YNR071C;N3605	chr14	770440	771468	-	HH	1189	68	1029
YPL171C	OYE3	chr16	226169	227371	-	HH	943	65	1203
YCL001W-B	YCL001W-B	chr03	113770	114024	+	HT	229	5	255
YIR042C	YIR042C	chr09	435273	435983	-	HT	0	45	711
YBR196C-B	YBR196C-B	chr02	614526	614630	-	HT	573	4	105
YDR106W	ARP10	chr04	667004	667858	+	HH	234	18	855
YGL188C-A	YGL188C-A	chr07	148824	148964	-	HT	740	5	141
YLR053C	YLR053C;L2137	chr12	248100	248426	-	HT	291	26	327
YJL077W-B	YJL077W-B	chr10	294047	294145	+	HH	66	10	99
YHR153C	SPO16	chr08	402086	402682	-	HH	284	32	597
YLR415C	YLR415C	chr12	954259	954597	-	HH	413	34	339
YDR366C	YDR366C	chr04	1212438	1212836	-	HH	12	48	399
YMR230W-A	YMR230W-A	chr13	733268	733456	+	HT	127	5	189
YDR281C	PHM6	chr04	1022007	1022321	-	HT	1190	149	315
YOR313C	SPS4	chr15	901858	902874	-	HH	1886	47	1017
YJL043W	YJL043W;J1204	chr10	360130	360903	+	HH	454	29	774
YER185W	PUG1	chr05	559454	560365	+	HH	774	22	912
YHR139C	SPS100	chr08	378219	379199	-	HH	1373	50	981
YFR012W	DCV1	chr06	167888	168496	+	HH	630	22	609
YNL146W	YNL146W;N1203;N1785	chr14	351715	352017	+	HH	135	88	303
YFR032C-B	YFR032C-B	chr06	223710	223973	-	HT	353	6	264
YOL159C-A	YOL159C-A	chr15	15233	15505	-	HT	1776	6	273
YDR034W-B	YDR034W-B	chr04	521314	521469	+	HH	622	54	156
YKR105C	VBA5	chr11	658716	660464	-	HH	978	25	1749
YKL096C-B	YKL096C-B	chr11	259073	259222	-	HH	31	11	150
YOR268C	YOR268C	chr15	825534	825932	-	HH	453	48	399
YGL051W	MST27;DUP2	chr07	403687	404391	+	HT	385	25	705
YOR387C	YOR387C	chr15	1069621	1070241	-	HT	1552	33	621
YOR031W	CRS5	chr15	389213	389422	+	HT	529	24	27
YPL201C	YIG1	chr16	169770	171155	-	HH	329	32	1386
YBR018C	GAL7	chr02	274427	275527	-	HT	726	32	1101
YNL270C	ALP1	chr14	135940	137661	-	HH	38	33	1722
YDL024C	DIA3	chr04	408451	409857	-	HH	1968	35	1407
YOL132W	GAS4	chr15	71300	72715	+	HT	610	30	1416
YOR351C	MEK1;MRE4	chr15	995018	996511	-	HH	702	54	1494
YHR136C	SPL2	chr08	374654	375100	-	HH	609	142	447
YER044C-A	MEI4	chr05	238460	239774	-	HT	258	25	1227
YPL277C	YPL277C	chr16	15405	16868	-	HH	6070	29	1464
YDR461C-A	YDR461C-A	chr04	1385524	1385766	-	HH	307	0	243
YMR105W-A	YMR105W-A	chr13	478064	478258	+	HH	458	1	195
YHL050C	YHL050C	chr08	445	3311	-	HT	415	49	2094
YLR031W	YLR031W	chr12	204225	204785	+	HT	144	19	561
YLL042C	ATG10;APG10	chr12	52087	52590	-	HT	541	16	504
YPL279C	YPL279C	chr16	13228	14355	-	HT	698	59	1128
YNL128W	TEP1	chr14	382359	383663	+	HT	157	26	1305
YBR285W	YBR285W;YBR2023	chr02	773922	774356	+	HT	290	29	435
YGL089C	MF(ALPHA)2;MF-ALPHA-2;MFAL2	chr07	344791	345153	-	HT	1253	61	363
YGR066C	YGR066C	chr07	620921	621799	-	HT	573	36	879
YLR385C	SWC7;AWS1	chr12	892992	893390	-	HH	238	21	399
YKL037W	AIM26	chr11	369365	369721	+	HT	248	20	357
YCL026C-B	HBN1	chr03	73405	73986	-	HT	718	10	582
YOR390W	YOR390W	chr15	1076784	1077911	+	HT	697	63	1128
YLR010C	TEN1	chr12	167320	167802	-	HH	1301	17	483
YBR196C-A	YBR196C-A	chr02	614024	614173	-	HT	353	6	150
YBR240C	THI2;PHO6	chr02	700490	701842	-	HT	747	30	1353
YCR020C	PET18;HIT2	chr03	154012	154659	-	HT	171	25	648
YLR329W	REC102	chr12	786442	787333	+	HT	324	24	795
YFR026C	ULI1	chr06	205748	206257	-	HH	1195	32	510
YNL086W	SNN1	chr14	466334	466642	+	HT	387	12	309
YDL218W	YDL218W	chr04	66493	67446	+	HT	728	32	954
YDR403W	DIT1	chr04	1274602	1276212	+	HH	899	43	1611
YOR348C	PUT4	chr15	986899	988782	-	HH	1007	57	1884
YCR098C	GIT1	chr03	297049	298605	-	HT	2227	38	1557
YJL038C	LOH1	chr10	375115	375774	-	HH	888	56	660
YOR237W	HES1;OSH5	chr15	781994	783298	+	HT	453	39	1305
YHL022C	SPO11	chr08	62961	64157	-	HT	305	30	1197
YDR040C	ENA1;HOR6;PMR2;PMR2A	chr04	535192	538467	-	HH	1336	49	3276
YGR035W-A	YGR035W-A	chr07	557565	557786	+	HH	143	5	222
YLR125W	YLR125W;L3101	chr12	393484	393894	+	HH	3214	27	411
YIL014C-A	YIL014C-A	chr09	325212	325526	-	HH	577	17	315
YLR364W	GRX8	chr12	854062	854391	+	HT	344	45	330
YHR014W	SPO13	chr08	132047	132922	+	HH	601	21	876
YHR007C-A	YHR007C-A	chr08	122550	122765	-	HT	124	10	216
YNL117W	MLS1	chr14	406358	408022	+	HH	794	42	1665
YDR042C	YDR042C;YD6888.04c	chr04	540601	541203	-	HT	1471	61	603
YLR037C	PAU23;DAN2	chr12	222685	223059	-	HT	1862	39	375
YML058W-A	HUG1	chr13	158760	158966	+	HH	502	50	207
YFL057C	AAD16	chr06	14305	14763	-	HT	30	21	459
YJL089W	SIP4	chr10	265926	268415	+	HH	875	40	2490
YDR437W	GPI19	chr04	1337352	1337774	+	HT	399	16	423
YDL169C	UGX2	chr04	158064	158735	-	HH	869	23	672
YGL183C	MND1	chr07	156543	157285	-	HH	621	25	660
YIR030C	DCG1	chr09	412036	412770	-	HT	245	27	735
YLR411W	CTR3	chr12	947253	947978	+	HT	6272	30	726
YOR034C-A	YOR034C-A;NOR002C	chr15	397426	397668	-	HT	67	0	243
YHR021W-A	ECM12	chr08	149225	149680	+	HH	556	24	456
YGL194C-A	YGL194C-A	chr07	139719	139961	-	HT	407	0	243
YMR018W	YMR018W;YM9711.06	chr13	310208	311752	+	HT	1526	20	1545
YLR408C	BLS1	chr12	933885	934253	-	HT	161	18	369
YJL088W	ARG3	chr10	268799	269815	+	HT	384	59	1017
YJR161C	COS5	chr10	742848	743999	-	HT	0	24	1152
YBR180W	DTR1	chr02	589741	591459	+	HH	627	28	1719
YHR140W	YHR140W	chr08	380572	381291	+	HH	1373	52	720
YAR029W	YAR029W;FUN57	chr01	186321	186545	+	HT	725	27	225
YMR040W	YET2	chr13	350381	350863	+	HH	859	45	483
YLR281C	YLR281C	chr12	704493	704960	-	HH	226	45	468
YMR001C-A	YMR001C-A	chr13	271347	271577	-	HH	616	3	231
YDL210W	UGA4	chr04	84270	85985	+	HH	3858	29	1716
YHL006C	SHU1	chr08	98343	98795	-	HH	424	18	453
YLR146W-A	YLR146W-A	chr12	433870	434058	+	HH	145	0	189
YPR015C	YPR015C;LPZ14c	chr16	590283	591026	-	HT	1306	52	744
YKR095W-A	PCC1	chr11	625864	626205	+	HT	432	2	267
YDR374W-A	YDR374W-A	chr04	1224757	1225026	+	HH	363	0	270
YIL060W	YIL060W	chr09	246392	246826	+	HH	833	46	435
YER066W	RRT13	chr05	290242	290799	+	HH	3328	19	558
YKR104W	YKR104W	chr11	656836	657756	+	HT	100	18	921
YIL024C	YIL024C	chr09	308602	309171	-	HT	215	18	570
YLR164W	YLR164W	chr12	493883	494389	+	HH	629	0	507
YKR005C	YKR005C;YK104	chr11	448521	450167	-	HT	256	14	1578
YIL099W	SGA1;SGA	chr09	178004	179653	+	HH	754	60	1650
YGL121C	GPG1	chr07	280777	281157	-	HT	477	37	381
YMR069W	NAT4	chr13	407709	408566	+	HT	125	21	858
YCR063W	BUD31;CWC14	chr03	228318	228791	+	HT	860	30	474
YKL055C	OAR1	chr11	335321	336157	-	HT	380	22	837
YNL196C	SLZ1	chr14	270275	271171	-	HT	352	17	897
YOR302W	YOR302W	chr15	882765	882842	+	HT	493	47	78
YPL264C	YPL264C	chr16	43283	44344	-	HT	207	19	1062
YIR028W	DAL4	chr09	408468	410375	+	HH	826	34	1908
YLR377C	FBP1	chr12	873746	874792	-	HT	944	34	1047
YER187W	YER187W	chr05	566230	566655	+	HH	3605	19	426
YPR002W	PDH1	chr16	558385	559935	+	HT	548	63	1551
YBR047W	FMP23	chr02	331833	332360	+	HH	322	35	528
YDL085W	NDE2;NDH2	chr04	303211	304848	+	HH	541	37	1638
YHR015W	MIP6	chr08	134554	136533	+	HT	1632	25	1980
YNL336W	COS1	chr14	8330	9475	+	HH	2232	58	1146
YHL018W	YHL018W	chr08	69708	70070	+	HH	160	21	363
YHR160C	PEX18	chr08	419221	420072	-	HT	301	29	852
YDR252W	BTT1	chr04	963412	963861	+	HT	306	12	450
YDR286C	YDR286C	chr04	1035231	1035575	-	HH	420	22	345
YBR147W	RTC2;YPQ3	chr02	536575	537465	+	HT	479	37	891
YNL146C-A	YNL146C-A	chr14	351386	351580	-	HH	135	8	195
YHR215W	PHO12	chr08	552099	553502	+	HH	600	114	1404
YNL162W-A	YNL162W-A	chr14	330329	330547	+	HH	256	9	219
YDR018C	YDR018C;PZF396;YD9335.04C	chr04	482670	483860	-	HT	303	27	1191
YFL040W	YFL040W	chr06	51350	52972	+	HT	343	27	1623
YCR075W-A	YCR075W-A	chr03	248975	249202	+	HH	160	1	228
YOR177C	MPC54	chr15	665785	667179	-	HT	681	22	1395
YLR312C	YLR312C	chr12	757637	758833	-	HH	647	51	1197
YIR005W	IST3;SNU17	chr09	364889	365335	+	HT	370	22	447
YBR148W	YSW1	chr02	537876	539705	+	HT	411	30	1830
YPL096C-A	ERI1;RIN1	chr16	366529	366735	-	HH	192	1	207
YGR109C	CLB6	chr07	705359	706501	-	HH	7208	34	1143
YBR045C	GIP1	chr02	328173	330092	-	HT	415	27	1920
YKL086W	SRX1	chr11	278281	278664	+	HH	418	33	384
YDR038C	ENA5	chr04	527422	530697	-	HT	610	26	3276
YJL216C	IMA5	chr10	24341	26086	-	HH	801	26	1746
YNL211C	YNL211C;N1328	chr14	250055	250315	-	HH	616	32	261
YGR153W	YGR153W;G6661	chr07	796092	796745	+	HH	600	23	654
YCR101C	YCR101C	chr03	302482	303030	-	HT	1331	16	549
YPL209C	IPL1	chr16	156490	157593	-	HH	249	26	1104
YBR201C-A	YBR201C-A	chr02	624493	624696	-	HH	1076	0	204
YFR035C	YFR035C	chr06	226121	226465	-	HH	498	43	345
YER096W	SHC1	chr05	351698	353236	+	HT	516	35	1539
YNR064C	YNR064C;N3535	chr14	749136	750008	-	HT	342	30	873
YGR016W	YGR016W	chr07	522261	522833	+	HH	185	16	573
YOL114C	YOL114C;HRE202	chr15	103317	103925	-	HH	401	24	609
YPR001W	CIT3	chr16	556377	557837	+	HT	648	40	1461
YLR315W	NKP2	chr12	764808	765269	+	HH	671	19	462
YML087C	AIM33	chr13	94431	95369	-	HT	422	36	939
YEL077C	YEL077C	chr05	264	4097	-	HT	88	17	3834
YBL043W	ECM13	chr02	136688	137461	+	HT	322	53	774
YNR057C	BIO4	chr14	733356	734069	-	HH	222	16	714
YNR058W	BIO3	chr14	734291	735733	+	HH	222	33	1443
YOR376W-A	YOR376W-A	chr15	1045196	1045351	+	HH	2154	5	156
YEL057C	YEL057C	chr05	45020	45721	-	HH	1447	26	702
YHR044C	DOG1	chr08	194068	194808	-	HH	743	28	741
YFL055W	AGP3	chr06	17004	18680	+	HH	1573	35	1677
YEL072W	RMD6	chr05	13720	14415	+	HH	6167	34	696
YFL053W	DAK2	chr06	23423	25198	+	HH	636	28	1776
YAR033W	MST28	chr01	188107	188811	+	HT	375	32	705
YGL184C	STR3	chr07	154615	156012	-	HT	531	52	1398
YKR097W	PCK1;PEPC;PPC1	chr11	631152	632801	+	HT	772	49	1650
YPL189W	GUP2	chr16	189154	190983	+	HH	641	59	1830
YBL059W	YBL059W;YBL0508;YBL0516	chr02	110594	111244	+	HH	55	44	582
YHR184W	SSP1	chr08	472744	474459	+	HT	315	26	1716
YCR010C	ADY2;ATO1	chr03	132273	133124	-	HT	600	54	852
YGL146C	RRT6	chr07	228751	229686	-	HH	557	24	936
YGR256W	GND2	chr07	1004624	1006102	+	HH	662	43	1479
YGL170C	SPO74	chr07	184153	185394	-	HH	665	10	1242
YGR131W	FHN1	chr07	754726	755250	+	HH	882	40	525
YDR009W	GAL3	chr04	463434	464996	+	HT	918	32	1563
YNL195C	YNL195C;N1390	chr14	271523	272308	-	HT	402	48	786
YCR105W	ADH7	chr03	309070	310155	+	HT	895	49	1086
YHR175W-A	YHR175W-A	chr08	453558	453707	+	HT	117	0	150
YER046W	SPO73	chr05	243180	243611	+	HH	1679	35	432
YPR201W	ARR3;ACR3	chr16	939922	941136	+	HH	251	27	1215
YNR068C	YNR068C;N3551	chr14	760067	760885	-	HT	238	33	819
YDR079C-A	TFB5	chr04	603593	603811	-	HH	197	2	219
YIL089W	YIL089W	chr09	195599	196216	+	HT	529	21	618
YDR522C	SPS2	chr04	1483795	1485303	-	HT	263	33	1509
YNL097C-B	YNL097C-B;YNL097C-A	chr14	440797	440919	-	HT	447	10	123
YGR204C-A	YGR204C-A	chr07	909061	909174	-	HH	39	2	114
YDL214C	PRR2	chr04	74446	76545	-	HT	744	36	2100
YDR379C-A	YDR379C-A;smORF139;smORF8	chr04	1233278	1233517	-	HH	701	11	240
YBR013C	YBR013C;YBR0209	chr02	265492	265881	-	HT	844	21	390
YOR389W	YOR389W	chr15	1074213	1076087	+	HH	1290	56	1875
YJR154W	YJR154W;J2240	chr10	725784	726824	+	HT	1884	22	1041
YAL037W	YAL037W	chr01	74020	74823	+	HH	502	27	804
YLR460C	YLR460C;L9122.7	chr12	1059757	1060887	-	HH	2032	52	1131
YDR191W	HST4	chr04	842337	843449	+	HH	342	23	1113
YLR174W	IDP2	chr12	504591	505829	+	HT	344	60	1239
YGL081W	YGL081W	chr07	357377	358339	+	HT	405	15	963
YGR230W	BNS1	chr07	951894	952307	+	HH	995	21	414
YLR376C	PSY3	chr12	872826	873554	-	HT	192	17	729
YDR536W	STL1	chr04	1508005	1509714	+	HH	3105	48	1710
YDL211C	YDL211C;D1026	chr04	79294	80412	-	HH	3858	38	1119
YER180C-A	SLO1	chr05	550865	551122	-	HH	1403	1	258
YJR097W	JJJ3;DPH4	chr10	612413	612931	+	HT	370	14	519
YMR059W	SEN15	chr13	391099	391485	+	HT	367	13	387
YIL066C	RNR3;DIN1	chr09	238099	240708	-	HT	600	54	2610
YJR155W	AAD10	chr10	727405	728271	+	HT	581	27	867
YHR035W	YHR035W	chr08	178219	180111	+	HH	220	20	1893
YLR070C	XYL2	chr12	274141	275211	-	HT	167	31	1071
YGR035C	YGR035C	chr07	557072	557422	-	HH	143	48	351
YMR095C	SNO1	chr13	457285	457959	-	HH	449	38	675
YDR528W	HLR1	chr04	1494586	1495857	+	HT	2173	31	1272
YLL062C	MHT1	chr12	16639	17613	-	HH	343	33	975
YMR118C	YMR118C;YM9718.17C	chr13	502144	502734	-	HH	2599	0	591
YBL049W	MOH1	chr02	126828	127244	+	HT	709	33	417
YOL091W	SPO21;MPC70	chr15	145334	147163	+	HT	204	22	1830
YOR242C	SSP2	chr15	788742	789857	-	HT	354	16	1116
YFL017W-A	SMX2;SNP2	chr06	103699	103932	+	HH	572	27	234
YDR003W-A	YDR003W-A	chr04	454782	454904	+	HT	28	1	123
YNL093W	YPT53	chr14	449868	450530	+	HT	494	23	663
YGR206W	MVB12	chr07	910432	910737	+	HT	347	16	306
YBR258C	SHG1;CPS15	chr02	729734	730162	-	HH	225	18	429
YDR179C	CSN9	chr04	818708	819196	-	HH	237	50	489
YDL248W	COS7	chr04	1802	2953	+	HT	0	24	1152
YPL257W	YPL257W	chr16	63279	63860	+	HH	8126	17	582
YCL021W-A	YCL021W-A	chr03	83620	83997	+	HT	1345	7	378
YBR076W	ECM8	chr02	390227	391291	+	HT	1011	40	1065
YHL043W	ECM34	chr08	14901	15413	+	HT	629	21	513
YMR232W	FUS2	chr13	736926	738959	+	HT	292	29	2034
YHR116W	COX23	chr08	341665	342120	+	HH	306	21	456
YNL092W	YNL092W;N2227	chr14	450871	452073	+	HT	341	34	1203
YJL194W	CDC6	chr10	69338	70879	+	HH	556	31	1542
YER093C-A	AIM11;GEP8	chr05	347912	348400	-	HT	329	12	414
YJL170C	ASG7	chr10	101150	101779	-	HT	448	41	630
YFL052W	YFL052W	chr06	28232	29629	+	HT	3034	31	1398
YGL205W	POX1;FOX1	chr07	108158	110404	+	HH	654	40	2247
YDR066C	RTR2	chr04	581908	582498	-	HT	293	15	591
YIL156W-B	YIL156W-B	chr09	47690	47973	+	HH	148	0	222
YGR161W-C	YGR161W-C	chr07	810227	810505	+	HH	807	6	279
YHR022C	YHR022C	chr08	149575	150345	-	HT	872	41	771
YLR341W	SPO77	chr12	807385	808818	+	HT	560	42	1434
YBL039W-B	YBL039W-B	chr02	143393	143572	+	HH	525	1	180
YIL160C	POT1;FOX3;POX3	chr09	40191	41444	-	HH	381	32	1254
YMR251W	GTO3	chr13	772915	774015	+	HT	357	40	1101
YLL056C	YLL056C;L0575	chr12	27409	28305	-	HH	1804	24	897
YGR067C	YGR067C	chr07	622372	624786	-	HT	538	43	2415
YJL161W	FMP33	chr10	117245	117787	+	HH	1616	30	543
YMR271C	URA10	chr13	806865	807548	-	HT	2075	38	684
YNL210W	MER1	chr14	250931	251743	+	HH	616	24	813
YDL243C	AAD4	chr04	17577	18566	-	HH	2069	23	990
YIR017C	MET28	chr09	383556	384119	-	HH	490	43	564
YHL042W	YHL042W	chr08	15667	16119	+	HT	254	17	453
YJR055W	HIT1	chr10	538772	539266	+	HT	1223	16	495
YHL044W	YHL044W	chr08	13565	14272	+	HH	1280	45	708
YJR153W	PGU1;PGL1;PSM1	chr10	722815	723900	+	HT	1518	28	1086
YER058W	PET117	chr05	271768	272091	+	HH	642	30	324
YJL205C	NCE101;NCE1	chr10	50139	50443	-	HT	186	10	162
YLL063C	AYT1	chr12	14648	16072	-	HT	567	21	1425
YLL052C	AQY2;AQY2-2	chr12	35912	36361	-	HT	972	35	450
YJR149W	YJR149W;J2213	chr10	707160	708374	+	HT	286	39	1215
YPL046C	ELC1	chr16	466644	466943	-	HH	317	22	300
YEL041W	YEF1	chr05	75944	77431	+	HT	617	40	1488
YHR199C-A	NBL1	chr08	498571	498859	-	HH	220	2	222
YAR023C	YAR023C	chr01	179281	179820	-	HH	3950	22	540
YOR304C-A	YOR304C-A	chr15	888520	888750	-	HH	272	21	231
YBL013W	FMT1	chr02	202056	203261	+	HH	308	17	1206
YBR091C	TIM12;MRS5	chr02	427155	427484	-	HT	214	39	330
YLL057C	JLP1	chr12	25756	26994	-	HT	415	30	1239
YOR180C	DCI1;ECI2;EHD2	chr15	674352	675167	-	HH	772	31	816
YIL132C	CSM2	chr09	99860	100501	-	HT	280	20	642
YJR034W	PET191	chr10	496683	497009	+	HH	232	10	327
YLR054C	OSW2	chr12	248717	250978	-	HT	294	35	2175
YNR056C	BIO5	chr14	731618	733303	-	HT	53	29	1686
YLL033W	IRC19;RRG4	chr12	73409	74101	+	HH	263	25	693
YAL046C	AIM1	chr01	57029	57385	-	HH	133	31	357
YOL084W	PHM7	chr15	162356	165331	+	HH	1762	58	2976
YPR192W	AQY1;AQY1-2	chr16	921860	922777	+	HT	1373	32	918
YKR041W	YKR041W	chr11	518198	518950	+	HT	1327	36	753
YIR039C	YPS6	chr09	430498	432111	-	HH	1818	33	1614
YDR534C	FIT1	chr04	1503314	1504900	-	HH	3105	34	1587
YIL072W	HOP1	chr09	226602	228419	+	HH	648	29	1818
YIL006W	YIA6;NDT1	chr09	344062	345183	+	HH	406	21	1122
YLR142W	PUT1	chr12	425186	426616	+	HT	412	58	1431
YJR135C	MCM22	chr10	676059	676778	-	HH	193	16	720
YPR046W	MCM16	chr16	656799	657344	+	HH	247	13	546
YDR320C-A	DAD4;HSK2	chr04	1108280	1108498	-	HH	204	2	219
YBL071W-A	KTI11;DPH3	chr02	89978	90226	+	HH	422	8	249
YLR081W	GAL2;IMP1	chr12	290212	291936	+	HT	962	55	1725
YNL204C	SPS18;SPX18	chr14	258375	259277	-	HH	301	31	903
YLR390W	ECM19	chr12	903066	903404	+	HH	406	27	339
YOL154W	ZPS1	chr15	34658	35407	+	HH	3052	47	750
YHR167W	THP2	chr08	439342	440127	+	HH	292	11	786
YJL153C	INO1	chr10	134332	135933	-	HT	439	84	1602
YNR010W	CSE2;MED9	chr14	643744	644193	+	HT	305	20	450
YPR153W	YPR153W	chr16	833689	834245	+	HH	231	18	423
YHR210C	YHR210C	chr08	520712	521737	-	HH	3655	30	1026
YDR317W	HIM1	chr04	1102184	1103428	+	HT	7006	27	1245
YHR059W	FYV4	chr08	220108	220500	+	HH	224	11	393
YBR020W	GAL1	chr02	279021	280607	+	HH	669	39	1587
YEL048C	TCA17	chr05	64709	65167	-	HT	218	12	459
YFR027W	ECO1;CTF7	chr06	207452	208297	+	HH	1195	17	846
YNL259C	ATX1	chr14	157644	157865	-	HT	244	53	222
YNL328C	MDJ2	chr14	22834	23274	-	HH	774	21	441
YJL218W	YJL218W;HRA196;J0224	chr10	21973	22563	+	HT	773	41	591
YPL124W	SPC29;LPH3;NIP29	chr16	316755	317516	+	HT	269	31	762
YBR213W	MET8	chr02	650368	651192	+	HT	464	27	825
YGL226W	MTC3	chr07	73340	73711	+	HH	182	28	372
YLR099W-A	YLR099W-A	chr12	341325	341588	+	HH	397	0	264
YER179W	DMC1;ISC2	chr05	548421	549517	+	HT	342	20	1005
YBR296C	PHO89;ITN1	chr02	796798	798522	-	HT	1601	121	1725
YOR114W	YOR114W;O3248;YOR3248w	chr15	537570	538454	+	HT	751	18	885
YDR078C	SHU2	chr04	602198	602869	-	HH	195	15	672
YCR020C-A	MAK31;NAA38	chr03	154830	155096	-	HH	224	19	267
YIR009W	MSL1	chr09	374525	374860	+	HH	219	19	336
YHR050W-A	YHR050W-A	chr08	209475	209645	+	HT	172	5	171
YAR035W	YAT1	chr01	190193	192256	+	HT	1382	47	2064
YLR213C	CRR1	chr12	566654	567922	-	HH	645	41	1269
YNL122C	YNL122C;N1901	chr14	398023	398370	-	HT	314	18	348
YJR022W	LSM8	chr10	469784	470113	+	HH	205	18	330
YGL240W	DOC1;APC10	chr07	48613	49365	+	HT	154	21	753
YIL102C-A	YIL102C-A	chr09	173365	173592	-	HT	990	0	228
YCL012C	YCL012C;YCL011C-A	chr03	101317	101788	-	HT	287	3	405
YDL200C	MGT1	chr04	100501	101067	-	HT	223	12	567
YOR284W	HUA2	chr15	848478	849209	+	HT	333	20	732
YBR184W	YBR184W;YBR1306	chr02	597363	598934	+	HT	298	20	1572
YAR031W	PRM9	chr01	186836	187732	+	HT	291	42	897
YPL272C	YPL272C	chr16	26611	28164	-	HH	1915	29	1554
YGR213C	RTA1	chr07	918512	919465	-	HH	1110	49	954
YHL012W	YHL012W	chr08	78936	80417	+	HH	583	33	1482
YKR102W	FLO10	chr11	646356	649865	+	HT	3852	47	3510
YPL258C	THI21	chr16	53498	55153	-	HH	8126	35	1656
YCR086W	CSM1;SPO86	chr03	263392	263964	+	HH	940	16	573
YER039C	HVG1;YEM9	chr05	228456	229205	-	HT	58	25	750
YMR025W	CSI1	chr13	323300	324187	+	HT	253	15	888
YNL289W	PCL1;HCS26	chr14	87897	88736	+	HT	657	134	840
YHR176W	FMO1	chr08	454229	455527	+	HT	522	24	1299
YLR011W	LOT6	chr12	169103	169678	+	HH	1301	24	576
YHR105W	YPT35	chr08	324766	325410	+	HT	374	12	645
YNR069C	BSC5	chr14	761123	762592	-	HH	2783	29	1470
YMR156C	TPP1	chr13	570300	571016	-	HT	261	10	717
YDR493W	MZM1;AIM8;FMP36	chr04	1436217	1436588	+	HT	343	15	372
YFL003C	MSH4	chr06	134521	137157	-	HT	7957	23	2637
YLR128W	DCN1	chr12	398530	399433	+	HH	211	26	810
YBR194W	AIM4;SOY1	chr02	610038	610409	+	HH	285	25	372
YGR096W	TPC1	chr07	676621	677565	+	HH	279	27	945
YAL063C	FLO9	chr01	24000	27968	-	HH	3599	36	3969
YAR050W	FLO1;FLO2;FLO4;FLO8	chr01	205081	209694	+	HT	8896	59	4614
YKL183C-A	YKL183C-A	chr11	98395	98607	-	HH	114	3	213
YPR094W	RDS3	chr16	720637	720960	+	HH	213	12	324
YIL037C	PRM2	chr09	283029	284999	-	HH	667	34	1971
YGL175C	SAE2;COM1	chr07	173285	174322	-	HH	223	15	1038
YMR063W	RIM9	chr13	397077	397796	+	HH	698	14	720
YDL021W	GPM2	chr04	413953	414888	+	HT	953	60	936
YLR273C	PIG1	chr12	689083	691029	-	HH	526	33	1947
YOR152C	YOR152C;O3536	chr15	617518	618288	-	HH	1552	27	771
YGL158W	RCK1	chr07	207033	208571	+	HT	3200	42	1539
YPL119C-A	YPL119C-A	chr16	324024	324287	-	HT	124	1	264
YDL160C-A	YDL160C-A	chr04	169366	169608	-	HT	802	0	243
YDL049C	KNH1	chr04	365068	365874	-	HT	865	48	807
YLR042C	YLR042C	chr12	229966	230451	-	HT	1251	83	486
YDR125C	ECM18	chr04	701397	702758	-	HH	476	27	1362
YDR016C	DAD1	chr04	478474	478758	-	HT	357	20	285
YFL030W	AGX1	chr06	76831	77988	+	HT	684	48	1158
YJL118W	YJL118W;J0742	chr10	191639	192298	+	HH	549	47	660
YLR245C	CDD1	chr12	626502	626930	-	HH	188	12	429
YDL098C	SNU23	chr04	284581	285165	-	HT	226	15	585
YML003W	YML003W;YM9571.16	chr13	263483	264355	+	HH	798	23	873
YNL138W-A	YSF3;RCP10	chr14	366033	366412	+	HH	316	2	258
YCR100C	YCR100C	chr03	301271	302221	-	HT	261	18	951
YEL019C	MMS21;NSE2	chr05	120498	121301	-	HH	170	19	804
YNR037C	RSM19	chr14	695052	695327	-	HH	268	48	276
YBR284W	YBR284W;YBR2021	chr02	771239	773632	+	HH	824	25	2394
YNL202W	SPS19;SPX19	chr14	259578	260456	+	HH	301	24	879
YOR338W	YOR338W;O6265	chr15	956898	957989	+	HT	275	49	1092
YJL214W	HXT8	chr10	26887	28596	+	HH	801	20	1710
YPR196W	YPR196W;P9677.4	chr16	931376	932788	+	HH	4439	25	1413
YOL128C	YGK3	chr15	78352	79479	-	HH	869	32	1128
YKR076W	ECM4;GTO2	chr11	582283	583395	+	HH	1533	54	1113
YER104W	RTT105	chr05	366802	367428	+	HT	285	10	627
YFL056C	AAD6	chr06	14793	15431	-	HH	1573	32	639
YFR036W	CDC26;HIT3;SCD26	chr06	226963	227337	+	HH	498	32	375
YMR084W	YMR084W	chr13	436628	437416	+	HT	713	45	789
YOR378W	YOR378W	chr15	1049511	1051058	+	HT	1708	43	1548
YGR079W	YGR079W	chr07	640720	641832	+	HH	349	80	1113
YIR029W	DAL2;ALC1	chr09	410807	411838	+	HT	432	25	1032
YLL060C	GTT2	chr12	21138	21839	-	HH	1730	26	702
YJL185C	ATG36	chr10	82095	82976	-	HH	472	22	882
YLR456W	YLR456W	chr12	1055070	1055684	+	HT	527	27	615
YGR239C	PEX21	chr07	969187	970053	-	HT	718	19	867
YGR287C	IMA1	chr07	1067222	1068991	-	HH	1302	36	1770
YPL267W	ACM1	chr16	38169	38798	+	HT	324	26	630
YLR313C	SPH1	chr12	760750	762342	-	HT	233	29	1593
YGR053C	YGR053C	chr07	594986	595837	-	HH	856	28	852
YOR032C	HMS1	chr15	389771	391075	-	HH	1101	66	1305
YKL161C	KDX1;MLP1	chr11	149386	150687	-	HH	2582	63	1302
YDR540C	IRC4	chr04	1517136	1517675	-	HT	1989	23	540
YBR255C-A	YBR255C-A	chr02	726618	727074	-	HT	312	7	363
YMR169C	ALD3;ALD4	chr13	599352	600872	-	HT	690	145	1521
YLR004C	THI73	chr12	157934	159505	-	HH	544	25	1572
YOR010C	TIR2;SRP2	chr15	346195	346950	-	HH	2729	60	756
YOR192C	THI72	chr15	698768	700567	-	HT	3421	56	1800
YDR031W	MIC14	chr04	503498	503863	+	HH	225	31	366
YDL222C	FMP45	chr04	60872	61801	-	HT	443	38	930
YOR190W	SPR1;SSG1	chr15	690695	692032	+	HT	721	35	1338
YDL186W	YDL186W;D1281	chr04	125616	126449	+	HH	618	18	834
YDR343C	HXT6	chr04	1159608	1161320	-	HT	1637	68	1713
YKL071W	YKL071W	chr11	305114	305884	+	HT	3232	44	771
YMR094W	CTF13;CBF3C	chr13	455825	457261	+	HT	269	33	1437
YIR018C-A	YIR018C-A	chr09	385564	385701	-	HT	3871	10	138
YLR205C	HMX1	chr12	552724	553677	-	HH	901	45	954
YML027W	YOX1	chr13	221406	222563	+	HT	678	90	1158
YOR012W	YOR012W;OR26.02	chr15	356543	356956	+	HT	685	13	414
YNR062C	YNR062C;N3527	chr14	744360	745343	-	HH	1600	34	984
YNR066C	YNR066C;N3543	chr14	753725	755035	-	HT	711	89	1311
YKL163W	PIR3;CCW8	chr11	144401	145378	+	HH	1582	78	978
YNR040W	YNR040W;N3407	chr14	699690	700460	+	HH	259	19	771
YBL074C	AAR2	chr02	86722	87789	-	HT	734	21	1068
YOR258W	HNT3	chr15	811671	812324	+	HT	178	31	654
YNL331C	AAD14	chr14	16118	17248	-	HT	753	26	1131
YLR132C	USB1	chr12	407283	408155	-	HH	290	23	873
YIL164C	NIT1	chr09	34087	34686	-	HH	2699	32	600
YGL018C	JAC1;SEO2	chr07	459110	459664	-	HH	190	9	555
YHR189W	PTH1	chr08	484028	484600	+	HH	191	31	573
YGR188C	BUB1	chr07	872044	875109	-	HT	1560	24	3066
YBR050C	REG2	chr02	337183	338199	-	HT	521	45	1017
YJL105W	SET4	chr10	225055	226737	+	HT	1728	25	1683
YGR030C	POP6	chr07	545681	546157	-	HH	284	38	477
YER128W	VFA1	chr05	415859	416470	+	HT	305	23	612
YIL166C	YIL166C	chr09	30938	32566	-	HT	1152	25	1629
YNL279W	PRM1	chr14	110917	112902	+	HH	506	75	1986
YIL165C	YIL165C;YI9402.10AC	chr09	33718	34077	-	HT	10	29	360
YPR167C	MET16	chr16	876847	877632	-	HH	444	38	786
YGR240C-A	YGR240C-A	chr07	974577	974777	-	HT	98	4	201
YDR123C	INO2;DIE1;SCS1	chr04	698554	699468	-	HH	847	41	915
YBL025W	RRN10	chr02	171481	171918	+	HT	443	7	438
YBR117C	TKL2	chr02	474392	476437	-	HH	1234	53	2046
YGR110W	CLD1	chr07	713709	715046	+	HH	7208	41	1338
YBR186W	PCH2	chr02	600553	602360	+	HH	594	22	1695
YLR361C-A	YLR361C-A	chr12	849383	849679	-	HH	187	1	297
YPL047W	SGF11	chr16	465962	466261	+	HT	314	17	300
YCR007C	YCR007C;YCR045;YCR7C	chr03	126011	126730	-	HH	1740	29	720
YHL016C	DUR3	chr08	72037	74244	-	HH	455	54	2208
YER139C	RTR1	chr05	450563	451243	-	HH	322	20	681
YIL134W	FLX1	chr09	97395	98330	+	HH	670	22	936
YGR133W	PEX4;PAS2;UBC10	chr07	756896	757447	+	HH	444	18	552
YLR234W	TOP3;EDR1	chr12	609783	611753	+	HH	259	39	1971
YEL064C	AVT2	chr05	29797	31239	-	HT	455	15	1443
YKR083C	DAD2;HSK1	chr11	596421	596822	-	HT	233	15	402
YDR501W	PLM2	chr04	1451353	1452918	+	HH	500	23	1566
YOL159C	YOL159C	chr15	17281	17796	-	HT	1695	49	516
YPL108W	YPL108W	chr16	348446	348952	+	HH	1057	24	507
YGR126W	YGR126W;G6365	chr07	745835	746527	+	HT	400	18	693
YPL018W	CTF19;MCM18	chr16	517651	518760	+	HH	633	58	1110
YMR206W	YMR206W;YM8325.07	chr13	675896	676837	+	HH	1130	39	942
YPL192C	PRM3	chr16	182655	183056	-	HT	541	22	402
YBR268W	MRPL37	chr02	741299	741616	+	HT	277	35	318
YKL162C	YKL162C;YKL616	chr11	147630	148838	-	HT	548	25	1209
YBR128C	ATG14;APG14;CVT12	chr02	493081	494115	-	HT	238	14	1035
YDR424C	DYN2;SLC1	chr04	1319387	1319841	-	HH	223	41	279
YMR252C	YMR252C;YM9920.06C	chr13	775315	775719	-	HT	227	31	405
YPL144W	POC4;DMP1	chr16	280480	280926	+	HH	781	50	447
YML011C	RAD33	chr13	246895	247428	-	HH	249	14	534
YLL009C	COX17	chr12	131205	131414	-	HH	315	61	210
YDL057W	YDL057W	chr04	351434	352420	+	HT	397	23	987
YML042W	CAT2;CAT;YCAT	chr13	192788	194800	+	HH	1021	45	2013
YMR138W	CIN4;GTP1;UGX1	chr13	545155	545730	+	HH	192	35	576
YPR182W	SMX3	chr16	900194	900454	+	HH	527	21	261
YDR511W	ACN9	chr04	1470017	1470418	+	HT	312	16	402
YIL029C	YIL029C	chr09	300829	301257	-	HT	2422	15	429
YBR233W-A	DAD3	chr02	684977	685261	+	HT	308	6	285
YCR107W	AAD3	chr03	313890	314981	+	HT	434	60	1092
YNR004W	SWM2	chr14	635943	636383	+	HH	646	21	441
YKR039W	GAP1	chr11	515063	516871	+	HH	1904	54	1809
YOL141W	PPM2;TYW4	chr15	56452	58539	+	HT	172	27	2088
YGL127C	SOH1;MED31	chr07	270392	270775	-	HH	222	26	384
YMR303C	ADH2;ADR2	chr13	873291	874337	-	HH	650	77	1047
YMR117C	SPC24	chr13	501250	501891	-	HT	253	24	642
YBR230W-A	YBR230W-A	chr02	680362	680562	+	HH	312	4	201
YJR011C	YJR011C;J1438;YJR83.26	chr10	458641	459426	-	HT	369	37	786
YDL177C	YDL177C	chr04	141209	141721	-	HH	376	14	513
YDR124W	YDR124W	chr04	700315	701289	+	HH	847	25	975
YNL187W	SWT21	chr14	287994	289067	+	HT	385	12	1074
YKR045C	YKR045C	chr11	523418	523969	-	HT	254	16	552
YMR170C	ALD2;ALD5	chr13	601562	603082	-	HT	786	142	1521
YOL047C	YOL047C	chr15	241614	242747	-	HH	750	50	1071
YHR211W	FLO5	chr08	525392	528619	+	HH	3655	42	3228
YML037C	YML037C	chr13	204386	205408	-	HH	234	16	1023
YMR159C	ATG16;APG15;APG16;CVT11;SAP18	chr13	574476	574928	-	HH	138	15	453
YAL034W-A	MTW1;DSN3;NSL2	chr01	79718	80587	+	HT	283	24	870
YLR393W	ATP10	chr12	907079	907918	+	HH	774	21	840
YJR119C	JHD2	chr10	644304	646490	-	HH	636	32	2187
YBR182C	SMP1	chr02	593506	594864	-	HT	497	39	1359
YPL054W	LEE1	chr16	455759	456664	+	HH	769	65	906
YPL068C	YPL068C	chr16	424215	425096	-	HT	155	27	882
YFR042W	KEG1	chr06	238458	239060	+	HH	203	16	603
YKL208W	CBT1;SOC1	chr11	47157	47972	+	HH	862	20	816
YCL033C	MXR2;MSRB	chr03	62776	63282	-	HH	159	24	507
YPL189C-A	COA2	chr16	188307	188513	-	HH	641	10	207
YDR504C	SPG3	chr04	1456311	1456694	-	HT	1	15	384
YML009C	MRPL39	chr13	251304	251516	-	HT	323	56	213
YJL025W	RRN7	chr10	393967	395511	+	HT	364	16	1545
YPL052W	OAZ1	chr16	458799	459678	+	HH	341	34	879
YDL104C	QRI7	chr04	273653	274876	-	HT	272	16	1224
YDR201W	SPC19	chr04	856317	856814	+	HH	224	10	498
YOR044W	IRC23	chr15	413007	413480	+	HT	677	28	474
YDR503C	LPP1	chr04	1455042	1455866	-	HT	445	16	825
YLR080W	EMP46	chr12	287916	289250	+	HT	242	47	1335
YGR154C	GTO1	chr07	796798	797868	-	HH	675	22	1071
YKL050C	YKL050C;YKL263;YKL301	chr11	342852	345620	-	HT	455	21	2769
YIL009C-A	EST3	chr09	335666	336212	-	HH	3132	24	546
YLL049W	LDB18	chr12	40666	41205	+	HH	252	30	540
YML066C	SMA2	chr13	140424	141533	-	HH	677	30	1110
YMR056C	AAC1	chr13	387315	388244	-	HH	578	46	930
YMR187C	YMR187C;YM8010.17C	chr13	634689	635984	-	HT	307	23	1296
YNL214W	PEX17;PAS9	chr14	245617	246216	+	HT	187	13	600
YLR284C	ECI1	chr12	706198	707040	-	HH	320	27	843
YDR462W	MRPL28	chr04	1386073	1386516	+	HH	307	17	444
YCR060W	TAH1	chr03	224399	224734	+	HH	169	31	336
YLR154C	RNH203	chr12	447982	448314	-	HH	6382	43	333
YGR043C	NQM1	chr07	580435	581436	-	HT	1554	52	1002
YPL148C	PPT2	chr16	272294	272815	-	HH	440	34	522
YMR228W	MTF1	chr13	724626	725651	+	HH	241	22	1026
YJR048W	CYC1	chr10	526335	526664	+	HH	954	85	330
YPL250C	ICY2	chr16	74309	74719	-	HT	980	57	411
YFR007W	YFH7;AIM12	chr06	159299	160360	+	HT	1547	21	1062
YGL010W	YGL010W;YGL021	chr07	475545	476069	+	HH	298	28	525
YML050W	AIM32	chr13	173139	174074	+	HT	238	20	936
YDL183C	YDL183C;D1293	chr04	130871	131833	-	HH	1604	27	963
YGL047W	ALG13	chr07	411552	412160	+	HH	266	20	609
YPL113C	YPL113C	chr16	335953	337143	-	HT	293	31	1191
YNR063W	YNR063W;N3531	chr14	746943	748766	+	HH	1600	31	1824
YNL070W	TOM7;MOM7	chr14	493366	493548	+	HT	395	64	183
YMR096W	SNZ1	chr13	458408	459301	+	HH	449	51	894
YOL107W	YOL107W	chr15	112102	113130	+	HH	216	26	1029
YLR030W	YLR030W	chr12	203290	204081	+	HH	700	31	792
YPR066W	UBA3	chr16	681213	682112	+	HT	414	19	900
YLR218C	COA4;CMC3	chr12	573466	573918	-	HH	233	26	453
YDR253C	MET32	chr04	963990	964565	-	HH	548	35	576
YFR008W	FAR7	chr06	160535	161200	+	HT	175	22	666
YGR201C	YGR201C;G7727	chr07	902520	903197	-	HT	277	21	678
YLR275W	SMD2	chr12	694378	694800	+	HT	496	35	333
YBR033W	EDS1	chr02	301944	304703	+	HT	690	25	2760
YMR112C	MED11	chr13	494100	494495	-	HH	504	40	396
YNL314W	DAL82;DURM	chr14	44447	45214	+	HH	167	14	768
YNL009W	IDP3	chr14	614821	616083	+	HT	461	36	1263
YPL077C	YPL077C	chr16	409368	410090	-	HH	353	27	723
YOL071W	EMI5;SDH5	chr15	196507	196995	+	HT	170	46	489
YLR457C	NBP1	chr12	1055812	1056771	-	HH	563	19	960
YNL222W	SSU72	chr14	229094	229714	+	HT	240	31	621
YHR075C	PPE1	chr08	248439	249641	-	HH	1460	20	1203
YKR103W	NFT1	chr11	653080	656736	+	HT	3215	13	3657
YJL181W	YJL181W;J0435	chr10	85660	87495	+	HT	324	6	1836
YGR203W	YCH1	chr07	905237	905683	+	HH	489	44	447
YNR002C	ATO2;FUN34	chr14	633008	633856	-	HT	488	44	849
YBR282W	MRPL27	chr02	768240	768680	+	HH	634	27	441
YMR194C-B	CMC4	chr13	652594	652887	-	HH	1147	13	222
YML101C	CUE4	chr13	69735	70088	-	HH	50	37	354
YMR034C	YMR034C;YM9973.08C	chr13	339418	340722	-	HH	420	186	1305
YCR075C	ERS1	chr03	248033	248815	-	HH	160	27	783
YLR073C	RFU1	chr12	281019	281621	-	HT	335	39	603
YGL250W	RMR1	chr07	31910	32635	+	HH	274	28	726
YPR116W	RRG8	chr16	758648	759481	+	HT	520	9	834
YJL127C-B	YJL127C-B	chr10	181551	181709	-	HT	589	7	159
YBR291C	CTP1	chr02	783673	784572	-	HH	2434	38	900
YJR152W	DAL5;UREP1	chr10	719666	721297	+	HT	2036	31	1632
YDR489W	SLD5	chr04	1431012	1431896	+	HH	223	13	885
YNL164C	IBD2	chr14	325265	326320	-	HT	421	30	1056
YJL147C	YJL147C;J0639	chr10	141419	142567	-	HH	725	17	1149
YKL053C-A	MDM35	chr11	339182	339442	-	HT	226	36	261
YNL012W	SPO1	chr14	609686	611665	+	HT	233	38	1896
YPR082C	DIB1;CDH1;SNU16	chr16	704225	704656	-	HH	198	31	432
YPR006C	ICL2	chr16	567269	568996	-	HT	340	36	1728
YDL232W	OST4	chr04	38487	38597	+	HT	314	29	111
YPL039W	YPL039W	chr16	479225	480175	+	HH	224	13	951
YER153C	PET122	chr05	474041	474805	-	HH	215	25	765
YHR191C	CTF8	chr08	486230	486631	-	HH	195	11	402
YBL021C	HAP3	chr02	181660	182094	-	HH	307	17	435
YKL026C	GPX1	chr11	389380	389883	-	HT	357	51	504
YJR112W-A	YJR112W-A	chr10	637790	638168	+	HT	155	1	330
YNL310C	ZIM17;FMP28;HEP1;TIM15	chr14	51907	52431	-	HH	231	48	525
YMR144W	YMR144W;YM9375.13	chr13	553362	554390	+	HT	459	76	1029
YBR270C	BIT2	chr02	742761	744398	-	HH	454	12	1638
YPL183W-A	RTC6;TAE4	chr16	199095	199376	+	HH	1307	40	282
YGR015C	YGR015C	chr07	521090	522076	-	HH	185	19	987
YOR040W	GLO4;GER1	chr15	407064	407921	+	HT	520	31	858
YJR067C	YAE1	chr10	567019	567444	-	HH	199	10	426
YOR068C	VAM10	chr15	453869	454213	-	HT	1694	20	345
YPR098C	YPR098C	chr16	728947	729528	-	HH	263	17	486
YLR453C	RIF2	chr12	1041799	1042986	-	HH	1012	32	1188
YBL029W	YBL029W;YBL0422	chr02	166134	167264	+	HH	1362	55	1131
YIR018W	YAP5	chr09	384609	385346	+	HH	490	39	738
YGL247W	BRR6	chr07	36933	37526	+	HT	171	16	594
YPL088W	YPL088W	chr16	381965	382993	+	HH	815	55	1029
YDR179W-A	YDR179W-A;YD9395.13	chr04	819433	820824	+	HH	237	26	1392
YDL154W	MSH5	chr04	178334	181039	+	HT	278	30	2706
YKL006C-A	SFT1	chr11	430198	430632	-	HH	1274	42	294
YGL057C	GEP7	chr07	394966	395829	-	HT	206	15	864
YBR085W	AAC3	chr02	415983	416906	+	HH	722	30	924
YER053C-A	YER053C-A	chr05	260933	261046	-	HT	1006	20	114
YNL014W	HEF3;YEF3B;ZRG7	chr14	606319	609453	+	HT	708	35	3135
YJR047C	ANB1;HYP1;TIF51B	chr10	524908	525381	-	HH	954	54	474
YDR076W	RAD55	chr04	598468	599688	+	HT	386	29	1221
YIR014W	YIR014W	chr09	381086	381814	+	HH	702	23	729
YMR133W	REC114	chr13	536207	537609	+	HH	637	32	1287
YDR315C	IPK1;GSL1	chr04	1092741	1093586	-	HH	177	21	846
YKL084W	HOT13	chr11	280509	280859	+	HT	382	43	351
YPR005C	HAL1	chr16	565787	566671	-	HT	598	29	885
YPL194W	DDC1	chr16	179277	181115	+	HT	256	18	1839
YDL209C	CWC2;NTC40;SLC3	chr04	86207	87226	-	HH	286	16	1020
YPL152W	RRD2;NOH1;YPA2	chr16	265028	266104	+	HT	328	15	1077
YMR065W	KAR5;FIG3	chr13	399702	401216	+	HT	243	18	1515
YPL036W	PMA2	chr16	482843	485686	+	HH	942	62	2844
YLR246W	ERF2	chr12	627118	628197	+	HH	188	18	1080
YDR248C	YDR248C	chr04	957758	958339	-	HT	342	17	582
YOR134W	BAG7	chr15	578564	579793	+	HT	938	33	1230
YJL062W-A	COA3;COX25;RRG10	chr10	316723	316980	+	HH	248	6	258
YER137C	YER137C	chr05	441373	441819	-	HH	7655	27	447
YPR166C	MRP2	chr16	876282	876629	-	HT	218	13	348
YOR295W	UAF30	chr15	869208	869894	+	HT	257	19	687
YLR267W	BOP2	chr12	678212	679924	+	HH	488	60	1713
YKL220C	FRE2	chr11	9091	11226	-	HH	3259	43	2136
YPL241C	CIN2	chr16	95372	96258	-	HT	238	29	807
YDL105W	NSE4;QRI2	chr04	272389	273597	+	HH	488	20	1209
YLR318W	EST2	chr12	766542	769196	+	HH	184	25	2655
YPL051W	ARL3;ARP1	chr16	459963	460559	+	HT	285	48	597
YGR212W	SLI1	chr07	917040	918446	+	HT	339	22	1407
YPR068C	HOS1	chr16	682941	684353	-	HT	203	13	1413
YDR183W	PLP1	chr04	829585	830277	+	HT	231	23	693
YMR068W	AVO2	chr13	406304	407584	+	HH	731	15	1281
YKL070W	YKL070W;YKL343	chr11	306211	306720	+	HT	327	35	510
YLR165C	PUS5	chr12	494494	495258	-	HT	171	8	765
YKL187C	YKL187C	chr11	89284	91536	-	HT	1208	0	2253
YDL069C	CBS1	chr04	333121	333810	-	HT	407	10	690
YLR356W	ATG33	chr12	840321	840914	+	HH	1068	74	594
YKL003C	MRP17	chr11	437097	437492	-	HH	286	37	396
YNR020C	ATP23	chr14	667410	668222	-	HH	155	21	813
YGL162W	SUT1	chr07	198138	199037	+	HH	1735	45	900
YDR263C	DIN7;DIN3	chr04	994242	995534	-	HT	495	20	1293
YOR077W	RTS2	chr15	471899	472597	+	HH	279	25	699
YPL119C	DBP1	chr16	324411	326264	-	HH	364	20	1854
YGR075C	PRP38	chr07	636147	636875	-	HT	229	20	729
YOR003W	YSP3	chr15	331455	332891	+	HT	404	20	1437
YNL218W	MGS1	chr14	238238	240001	+	HH	575	21	1764
YDR249C	YDR249C	chr04	958681	959802	-	HH	812	19	1122
YKL138C-A	HSK3	chr11	184803	185012	-	HT	274	7	210
YJL133C-A	YJL133C-A	chr10	159623	159847	-	HH	772	8	225
YML043C	RRN11	chr13	190244	191767	-	HH	1021	23	1524
YGL254W	FZF1;SUL1	chr07	22304	23203	+	HT	196	70	900
YDR022C	ATG31;CIS1	chr04	488072	488662	-	HH	846	15	591
YOR226C	ISU2;NUA2	chr15	761614	762084	-	HH	741	94	471
YPL153C	RAD53;MEC2;SAD1;SPK1	chr16	261727	264192	-	HH	410	74	2466
YBL080C	PET112	chr02	73070	74695	-	HH	564	15	1626
YOL026C	MIM1;TOM13	chr15	274012	274353	-	HH	604	38	342
YER007W	PAC2	chr05	164527	166083	+	HT	242	20	1557
YCR083W	TRX3	chr03	259578	259961	+	HT	309	19	384
YHR137W	ARO9	chr08	375709	377250	+	HH	609	101	1542
YOL146W	PSF3	chr15	48864	49448	+	HH	221	24	585
YBR111W-A	SUS1	chr02	462139	462579	+	HH	266	0	291
YML129C	COX14	chr13	14541	14753	-	HT	382	20	213
YDR223W	CRF1	chr04	912099	913502	+	HT	798	28	1404
YKL068W-A	YKL068W-A	chr11	309206	309442	+	HT	1379	3	237
YKL167C	MRP49	chr11	133721	134134	-	HT	375	14	414
YMR023C	MSS1;PET53	chr13	319437	321017	-	HH	858	114	1581
YER071C	TDA2	chr05	301947	302327	-	HH	479	13	381
YGL154C	LYS5	chr07	215278	216096	-	HH	177	21	819
YKL061W	BLI1	chr11	325771	326112	+	HT	651	27	342
YJL206C	YJL206C;J0316	chr10	47659	49935	-	HT	204	18	2277
YPL017C	IRC15	chr16	518734	520233	-	HH	781	71	1500
YDL059C	RAD59	chr04	344237	344953	-	HH	712	27	717
YGL128C	CWC23	chr07	269293	270144	-	HT	248	16	852
YDR173C	ARG82;ARGR3;IPK2	chr04	810565	811632	-	HH	478	19	1068
YBR022W	POA1	chr02	283738	284271	+	HT	394	9	534
YBR262C	AIM5;FMP51	chr02	735720	736040	-	HH	224	34	321
YOL083W	ATG34;ATG19-B	chr15	165714	166952	+	HT	383	47	1239
YFR043C	IRC6	chr06	239114	239827	-	HT	165	16	714
YDR451C	YHP1	chr04	1361120	1362181	-	HH	697	38	1062
YAL037C-A	YAL037C-A	chr01	73426	73518	-	HH	502	4	93
YCR015C	YCR015C;YCR15C	chr03	141217	142170	-	HH	1464	11	954
YPR107C	YTH1	chr16	741438	742064	-	HH	390	20	627
YBR228W	SLX1	chr02	675313	676227	+	HH	179	11	915
YPL186C	UIP4	chr16	194512	195426	-	HT	524	35	915
YPL166W	ATG29	chr16	237338	237979	+	HH	231	21	642
YBL031W	SHE1	chr02	161699	162715	+	HT	370	10	1017
YDR058C	TGL2	chr04	567723	568703	-	HT	531	22	981
YHR061C	GIC1	chr08	221534	222478	-	HT	399	31	945
YHR177W	YHR177W	chr08	456591	457952	+	HT	1064	22	1362
YOL110W	SHR5;ERF4	chr15	109176	109889	+	HH	280	38	714
YDL107W	MSS2	chr04	268921	269976	+	HT	222	11	1056
YML036W	CGI121	chr13	205642	206293	+	HH	234	13	546
YJL072C	PSF2	chr10	305221	305862	-	HH	270	9	642
YCR020W-B	HTL1;DRT1	chr03	155320	155556	+	HH	224	23	237
YLR289W	GUF1	chr12	715089	717026	+	HH	185	13	1938
YMR257C	PET111	chr13	779629	782031	-	HT	589	32	2403
YOL008W	COQ10	chr15	310312	310935	+	HH	173	20	624
YPL099C	AIM43;FMP14	chr16	363520	364068	-	HT	318	16	549
YBL095W	YBL095W;YBL0835	chr02	43277	44089	+	HT	182	22	813
YDL238C	GUD1	chr04	28985	30454	-	HH	203	26	1470
YJL132W	YJL132W;J0678	chr10	161914	164166	+	HT	351	21	2253
YIL098C	FMC1	chr09	179772	180239	-	HH	188	24	468
YHR109W	CTM1	chr08	330310	332067	+	HT	250	16	1758
YGL075C	MPS2;MMC1	chr07	366925	368088	-	HH	665	23	1164
YPL147W	PXA1;PAL1;PAT2;SSH2	chr16	273255	275867	+	HH	440	58	2613
YPR054W	SMK1	chr16	666280	667446	+	HH	306	42	1167
YIL049W	DFG10	chr09	260158	260919	+	HT	388	24	762
YPL024W	RMI1;NCE4	chr16	503517	504242	+	HH	1334	42	726
YDL045W-A	MRP10	chr04	372248	372535	+	HT	487	35	288
YMR048W	CSM3	chr13	366981	367934	+	HH	276	23	954
YKL069W	YKL069W;YKL340	chr11	307285	307827	+	HT	565	46	543
YMR035W	IMP2	chr13	341142	341675	+	HH	420	38	534
YML108W	YML108W;YM8339.11	chr13	54793	55110	+	HT	325	40	318
YJL058C	BIT61	chr10	326242	327873	-	HT	245	15	1632
YPR168W	NUT2;MED10	chr16	878076	878549	+	HH	444	20	474
YKR091W	SRL3	chr11	611525	612265	+	HT	459	34	741
YJL035C	TAD2	chr10	380249	381001	-	HH	326	18	753
YAL054C	ACS1	chr01	42881	45022	-	HH	877	41	2142
YJR111C	YJR111C;J2009	chr10	635855	636706	-	HH	324	20	852
YCR027C	RHB1;RSG1	chr03	167370	167999	-	HT	2887	14	630
YOR334W	MRS2	chr15	944596	946008	+	HT	239	29	1413
YNR032C-A	HUB1	chr14	687243	687464	-	HH	171	27	222
YMR041C	ARA2	chr13	350966	351973	-	HH	630	42	1008
YER074W-A	YOS1	chr05	307653	308123	+	HT	457	13	258
YPR145C-A	YPR145C-A	chr16	824690	824926	-	HT	719	0	237
YBR167C	POP7;RPP2	chr02	571468	571890	-	HH	481	35	423
YMR158W	MRPS8	chr13	572248	572715	+	HH	204	26	468
YCR076C	YCR076C;YCR76C	chr03	249293	250045	-	HT	193	0	753
YNL142W	MEP2;AMT2	chr14	357453	358952	+	HH	2411	39	1500
YGL032C	AGA2	chr07	436570	436833	-	HT	634	120	264
YGL249W	ZIP2	chr07	33098	35212	+	HT	463	19	2115
YLR040C	YLR040C	chr12	228908	229582	-	HT	384	84	675
YLR404W	FLD1	chr12	928743	929600	+	HT	1124	13	858
YPR067W	ISA2	chr16	682220	682777	+	HT	108	21	558
YDR506C	GMC1	chr04	1459728	1461554	-	HT	804	16	1827
YKR037C	SPC34	chr11	510910	511797	-	HT	202	17	888
YLR323C	CWC24	chr12	778173	778952	-	HH	263	9	780
YIR019C	MUC1;FLO11;MAL5;S1;S2	chr09	389572	393675	-	HH	3619	71	4104
YER175C	TMT1;TAM1	chr05	539464	540363	-	HH	287	52	900
YPR071W	YPR071W;YP9499.26	chr16	688172	688807	+	HT	574	23	636
YLR423C	ATG17;APG17	chr12	971917	973170	-	HH	225	26	1254
YML054C	CYB2	chr13	165533	167308	-	HT	315	49	1776
YBR297W	MAL33;MAL3R	chr02	800523	801929	+	HH	281	39	1407
YBR072W	HSP26	chr02	382030	382674	+	HT	984	81	645
YDL139C	SCM3	chr04	211375	212046	-	HH	1305	14	672
YOR064C	YNG1	chr15	446079	446738	-	HH	701	27	660
YIL007C	NAS2	chr09	342994	343656	-	HH	406	13	663
YOR265W	RBL2	chr15	820454	820774	+	HT	296	46	321
YNL024C	YNL024C;N2809	chr14	587107	587847	-	HT	416	36	741
YLR063W	YLR063W;L2174	chr12	264157	265254	+	HT	209	20	1098
YPR061C	JID1	chr16	675977	676882	-	HH	283	35	906
YKR101W	SIR1	chr11	640540	642504	+	HH	572	24	1965
YLR426W	TDA5	chr12	987062	988113	+	HT	245	13	981
YPR134W	MSS18	chr16	798051	798857	+	HT	342	13	807
YNL063W	MTQ1	chr14	507758	508702	+	HH	661	12	945
YOR289W	YOR289W	chr15	853357	854112	+	HH	280	42	756
YMR042W	ARG80;ARGR1	chr13	352603	353136	+	HH	630	58	534
YHR100C	GEP4	chr08	314116	314673	-	HT	201	15	558
YAR008W	SEN34	chr01	158966	159793	+	HH	347	18	828
YDL127W	PCL2;CLN4	chr04	234927	235853	+	HT	1040	67	927
YGL063W	PUS2	chr07	383654	384766	+	HH	446	26	1113
YBR037C	SCO1	chr02	310565	311452	-	HH	446	20	888
YJR135W-A	TIM8	chr10	676971	677234	+	HH	193	48	264
YHR067W	HTD2;RMD12	chr08	230970	231812	+	HT	274	22	843
YPL213W	LEA1	chr16	150614	151330	+	HH	423	18	717
YJR094C	IME1	chr10	604569	605651	-	HH	2654	72	1083
YCL036W	GFD2	chr03	59026	60726	+	HH	348	25	1701
YPR174C	YPR174C	chr16	888043	888708	-	HH	266	15	666
YLR104W	LCL2	chr12	346585	346980	+	HH	644	35	396
YAL030W	SNC1	chr01	87286	87752	+	HH	255	33	354
YJL106W	IME2;SME1	chr10	221390	223327	+	HH	1374	44	1938
YMR256C	COX7	chr13	778945	779127	-	HT	502	72	183
YDR541C	YDR541C	chr04	1519664	1520698	-	HH	2551	37	1035
YHR101C	BIG1	chr08	314874	315968	-	HH	604	18	1008
YLR306W	UBC12	chr12	744151	744851	+	HH	288	31	567
YOL017W	ESC8	chr15	292529	294673	+	HH	455	29	2145
YLR326W	YLR326W	chr12	782174	782896	+	HH	795	35	723
YMR293C	HER2;GEP6;LRC6	chr13	855399	856793	-	HH	173	14	1395
YDR323C	PEP7;VAC1;VPL21;VPS19;VPT19	chr04	1112480	1114027	-	HT	406	28	1548
YDL109C	YDL109C;D2325	chr04	265258	267201	-	HH	497	11	1944
YPR083W	MDM36	chr16	704854	706593	+	HH	198	16	1740
YNL072W	RNH201;RNH35	chr14	490317	491240	+	HT	201	22	924
YDL199C	YDL199C;D1209	chr04	101290	103353	-	HT	296	21	2064
YNR009W	NRM1	chr14	642690	643439	+	HT	309	44	750
YKL133C	YKL133C	chr11	191679	193070	-	HT	504	20	1392
YIL061C	SNP1	chr09	244657	245559	-	HH	833	11	903
YKL018C-A	YKL018C-A	chr11	403580	403879	-	HH	223	1	300
YDR273W	DON1	chr04	1010176	1011273	+	HT	342	19	1098
YIL113W	SDP1	chr09	150559	151188	+	HH	571	40	630
YLR283W	YLR283W	chr12	705186	706130	+	HH	226	22	945
YOL086W-A	YOL086W-A	chr15	159173	159445	+	HH	536	0	273
YJL003W	COX16	chr10	432644	433000	+	HH	444	26	357
YJR098C	YJR098C;J1936	chr10	613186	615156	-	HH	420	22	1971
YHR202W	YHR202W	chr08	502388	504196	+	HH	1245	20	1809
YCL047C	POF1	chr03	43661	44437	-	HT	186	22	777
YGL085W	LCL3	chr07	349616	350440	+	HT	248	23	825
YCR050C	YCR050C;YCR50C	chr03	213464	213772	-	HH	299	61	309
YBL059C-A	CMC2	chr02	110125	110539	-	HH	55	14	330
YJR074W	MOG1	chr10	573095	573751	+	HH	160	29	657
YIL087C	AIM19	chr09	199646	200119	-	HT	371	56	474
YER076C	YER076C	chr05	312590	313498	-	HT	1036	18	909
YJL137C	GLG2	chr10	154985	156127	-	HH	42	12	1143
YOL009C	MDM12	chr15	309324	310139	-	HH	173	17	816
YOR357C	SNX3;GRD19	chr15	1009224	1009712	-	HH	449	66	489
YOR365C	YOR365C	chr15	1023461	1025572	-	HH	435	15	2112
YOR111W	YOR111W;O3237;YOR3237W	chr15	530429	531127	+	HT	181	18	699
YBR019C	GAL10	chr02	276253	278352	-	HH	669	34	2100
YLR134W	PDC5	chr12	410723	412414	+	HT	530	46	1692
YCL055W	KAR4	chr03	27929	28936	+	HH	570	39	1008
YDR478W	SNM1	chr04	1414575	1415171	+	HT	301	7	597
YER101C	AST2	chr05	360502	361794	-	HH	1306	27	1293
YLR091W	GEP5;RRG5	chr12	322297	323178	+	HT	217	15	882
YPL097W	MSY1	chr16	364952	366430	+	HH	225	13	1479
YPL071C	YPL071C	chr16	420048	420518	-	HH	430	41	471
YEL020W-A	TIM9	chr05	117211	117474	+	HT	241	18	264
YMR286W	MRPL33	chr13	841942	842202	+	HH	251	34	261
YNL107W	YAF9	chr14	420098	420778	+	HH	272	45	681
YIL146C	ATG32;ECM17	chr09	74184	75773	-	HT	581	21	1590
YMR090W	YMR090W;YM9582.15	chr13	449245	449928	+	HH	1159	51	684
YAL044W-A	YAL044W-A	chr01	57518	57850	+	HH	133	4	333
YNL165W	YNL165W;N1710	chr14	323832	325052	+	HH	267	20	1221
YAL033W	POP5	chr01	82706	83227	+	HH	755	41	522
YML118W	NGL3	chr13	32334	33851	+	HT	650	24	1518
YNL309W	STB1	chr14	52662	53924	+	HH	231	50	1263
YNL185C	MRPL19	chr14	292193	292669	-	HT	468	16	477
YOL095C	HMI1	chr15	139227	141347	-	HT	237	20	2121
YER018C	SPC25	chr05	191959	192624	-	HH	173	27	666
YJR082C	EAF6	chr10	581914	582255	-	HT	353	14	342
YCL016C	DCC1	chr03	94621	95763	-	HH	518	16	1143
YBL029C-A	YBL029C-A	chr02	164488	164772	-	HH	1362	29	285
YDR453C	TSA2	chr04	1365072	1365662	-	HT	602	52	591
YNL249C	MPA43	chr14	179394	181022	-	HT	339	18	1629
YGR243W	FMP43	chr07	977336	977776	+	HH	755	48	441
YKR077W	MSA2	chr11	583653	584744	+	HT	258	30	1092
YPR121W	THI22	chr16	778583	780301	+	HH	3401	21	1719
YDR260C	SWM1;APC13	chr04	976717	977229	-	HT	292	20	513
YLR407W	YLR407W	chr12	932967	933653	+	HH	612	22	687
YNL282W	POP3	chr14	107687	108274	+	HH	992	26	588
YDL217C	TIM22	chr04	67983	68606	-	HT	391	18	624
YDR268W	MSW1;MSW	chr04	1004004	1005143	+	HH	502	16	1140
YDR313C	PIB1	chr04	1089219	1090079	-	HT	354	20	861
YDL181W	INH1	chr04	135179	135436	+	HT	456	40	258
YDR119W-A	YDR119W-A	chr04	691014	691214	+	HT	481	0	201
YDR013W	PSF1	chr04	473157	473783	+	HT	216	14	627
YCL056C	PEX34	chr03	26925	27359	-	HH	570	32	435
YPL072W	UBP16	chr16	418512	420011	+	HT	485	10	1500
YOR319W	HSH49	chr15	912822	913463	+	HT	1377	37	642
YIL004C	BET1;SLY12	chr09	347946	348505	-	HH	617	24	429
YKL137W	CMC1	chr11	185957	186292	+	HH	276	32	336
YOR097C	YOR097C;YOR3180c	chr15	506978	507505	-	HT	443	14	528
YOR279C	RFM1	chr15	843698	844630	-	HT	362	14	933
YNL260C	YNL260C;N0838	chr14	156859	157455	-	HT	189	0	597
YMR087W	YMR087W;YM9582.12	chr13	442527	443381	+	HT	437	19	855
YOR130C	ORT1;ARG11	chr15	569929	570807	-	HT	1375	20	879
YMR244C-A	coa6	chr13	758517	758831	-	HH	976	0	315
YIR021W	MRS1;PET157	chr09	397294	398385	+	HH	3619	22	1092
YAL055W	PEX22	chr01	42177	42719	+	HT	276	11	543
YDR441C	APT2	chr04	1344517	1345062	-	HT	614	37	546
YBL010C	YBL010C;YBL0316	chr02	206107	206949	-	HH	245	9	843
YMR180C	CTL1	chr13	622251	623213	-	HT	403	18	963
YPL132W	COX11	chr16	301716	302618	+	HH	488	23	903
YMR150C	IMP1;PET2858	chr13	561956	562528	-	HH	568	14	573
YBL091C-A	SCS22	chr02	46565	47180	-	HT	183	28	528
YPL060W	MFM1;LPE10	chr16	434523	435764	+	HT	433	27	1242
YOR380W	RDR1	chr15	1051290	1052930	+	HT	232	37	1641
YGR263C	SAY1	chr07	1017967	1019241	-	HT	357	11	1275
YLR297W	YLR297W	chr12	724044	724433	+	HH	1671	119	390
YCR024C	SLM5	chr03	160744	162222	-	HT	377	15	1479
YDR140W	MTQ2;MTC6	chr04	734138	734803	+	HH	214	38	666
YOR358W	HAP5	chr15	1010161	1010889	+	HH	449	19	729
YDR126W	SWF1;PSL10	chr04	703234	704244	+	HH	476	23	1011
YJR122W	IBA57;CAF17	chr10	649776	651269	+	HT	634	23	1494
YLL018C-A	COX19	chr12	108676	108972	-	HT	930	34	297
YER142C	MAG1;MAG	chr05	455146	456036	-	HH	283	33	891
YDR259C	YAP6;HAL7	chr04	974631	975782	-	HT	935	54	1152
YBR176W	ECM31	chr02	583720	584658	+	HT	365	13	939
YDR305C	HNT2;APH1	chr04	1072746	1073488	-	HT	247	31	654
YCL037C	SRO9	chr03	57374	58678	-	HH	348	36	1305
YNL326C	PFA3	chr14	27337	28347	-	HT	392	19	1011
YJR058C	APS2;YAP17	chr10	544732	545175	-	HH	612	20	444
YBR141C	BMT2	chr02	527025	528038	-	HH	279	16	1014
YHR038W	RRF1;FIL1;KIM4	chr08	184066	184758	+	HT	362	18	693
YDR185C	UPS3;GEP2	chr04	831934	832473	-	HT	386	24	540
YHR048W	YHK8	chr08	204607	206151	+	HH	3297	35	1545
YPL255W	BBP1	chr16	67725	68882	+	HH	1111	38	1158
YGL193C	YGL193C;G1334	chr07	141916	142227	-	HH	19	30	312
YHR036W	BRL1	chr08	180345	181760	+	HT	234	16	1416
YMR274C	RCE1	chr13	814364	815311	-	HT	340	22	948
YMR184W	ADD37	chr13	628189	628785	+	HH	381	39	597
YNL275W	BOR1	chr14	119268	120998	+	HT	459	27	1731
YDR488C	PAC11	chr04	1429188	1430789	-	HH	223	20	1602
YKR020W	VPS51;API3;VPS67;WHI6	chr11	478338	478832	+	HH	275	17	495
YPL233W	NSL1	chr16	106172	106822	+	HH	732	19	651
YOR266W	PNT1	chr15	821023	822294	+	HT	249	13	1272
YGL117W	YGL117W	chr07	288512	289309	+	HT	2565	41	798
YDL033C	SLM3;MTO2;MTU1	chr04	392659	393912	-	HH	305	15	1254
YOL055C	THI20	chr15	224420	226075	-	HH	2539	41	1656
YDR075W	PPH3	chr04	597156	598082	+	HT	573	20	927
YHR124W	NDT80;DAS1	chr08	356561	358444	+	HT	480	58	1884
YJL096W	MRPL49	chr10	246490	246975	+	HT	246	21	486
YJR010C-A	SPC1	chr10	458077	458361	-	HT	280	22	285
YMR225C	MRPL44;YMR44	chr13	720960	721403	-	HT	190	39	297
YOR060C	SLD7	chr15	440390	441163	-	HH	371	14	774
YMR126C	DLT1	chr13	520761	521789	-	HT	540	29	1029
YML095C	RAD10	chr13	81481	82113	-	HH	162	12	633
YHR129C	ARP1;ACT3;ACT5	chr08	362999	364153	-	HT	1187	17	1155
YDR538W	PAD1;POF1	chr04	1510902	1511630	+	HT	1188	32	729
YLR288C	MEC3;PIP3;PSO9	chr12	713480	714904	-	HH	185	17	1425
YHR034C	PIH1;NOP17	chr08	176965	177999	-	HH	220	16	1035
YPR133W-A	TOM5;MOM8A	chr16	797557	797709	+	HH	347	16	153
YOR009W	TIR4	chr15	344335	345798	+	HH	1254	61	1464
YER028C	MIG3	chr05	210692	211876	-	HT	711	50	1185
YGR197C	SNG1	chr07	892497	894140	-	HH	553	27	1644
YAL009W	SPO7	chr01	135854	136633	+	HH	189	20	780
YHR209W	CRG1	chr08	519437	520312	+	HT	724	42	876
YBR223C	TDP1	chr02	668663	670297	-	HH	330	19	1635
YGL104C	VPS73	chr07	308713	310173	-	HH	794	38	1461
YPL069C	BTS1	chr16	422885	423892	-	HT	323	18	1008
YLR191W	PEX13;PAS20	chr12	537272	538432	+	HT	583	18	1161
YLR102C	APC9	chr12	342970	343767	-	HT	222	22	798
YBR231C	SWC5;AOR1	chr02	682179	683090	-	HH	338	21	912
YJL077C	ICS3	chr10	294666	295061	-	HH	184	38	396
YPL038W	MET31	chr16	480535	481068	+	HT	162	28	534
YHR033W	YHR033W	chr08	175548	176819	+	HT	459	42	1272
YJL126W	NIT2	chr10	184501	185424	+	HH	281	12	924
YDR070C	FMP16	chr04	588098	588379	-	HT	448	39	282
YPR101W	SNT309;NTC25	chr16	730492	731019	+	HT	279	18	528
YBR217W	ATG12;APG12	chr02	657832	658392	+	HH	232	20	561
YAL027W	SAW1	chr01	94687	95472	+	HT	201	23	786
YLR151C	PCD1	chr12	441715	442737	-	HT	221	20	1023
YIL065C	FIS1;MDV2	chr09	241308	241775	-	HH	168	21	468
YMR085W	YMR085W	chr13	437491	438789	+	HT	75	29	1299
YCR019W	MAK32	chr03	152837	153928	+	HH	3934	46	1092
YJL116C	NCA3	chr10	193860	194873	-	HH	1414	53	1014
YKR004C	ECM9	chr11	446799	448036	-	HT	485	18	1134
YEL004W	YEA4	chr05	146951	147979	+	HH	196	22	1029
YGL096W	TOS8	chr07	325331	326161	+	HT	2101	47	831
YML041C	VPS71;SWC6	chr13	194913	195755	-	HT	7020	24	843
YCR071C	IMG2	chr03	240103	240543	-	HT	262	26	441
YLR211C	ATG38	chr12	563792	564531	-	HT	329	0	681
YBR070C	ALG14	chr02	379221	379934	-	HH	477	47	714
YBR195C	MSI1;CAC3	chr02	610614	611882	-	HT	354	20	1269
YIR025W	MND2	chr09	403659	404765	+	HH	168	14	1107
YIR031C	DAL7;MLS2;MSL2	chr09	413015	414679	-	HT	351	33	1665
YLR036C	YLR036C	chr12	221521	222132	-	HT	553	22	612
YMR060C	SAM37;MAS37;PET3027;TOM37	chr13	391532	392515	-	HH	240	19	984
YPL107W	YPL107W	chr16	349119	349865	+	HT	167	28	747
YFR045W	YFR045W	chr06	241998	242999	+	HH	561	19	930
YIL002W-A	YIL002W-A	chr09	350301	350510	+	HT	298	8	210
YGL053W	PRM8;DUP1	chr07	402589	403302	+	HH	1302	43	714
YMR137C	PSO2;SNM1	chr13	542978	544963	-	HH	192	29	1986
YDL142C	CRD1;CLS1	chr04	201719	202570	-	HH	469	13	852
YGL174W	BUD13;CWC26;SLC7	chr07	174545	175345	+	HH	223	9	801
YML112W	CTK3	chr13	45063	45953	+	HT	272	32	891
YDR282C	YDR282C	chr04	1023511	1024755	-	HT	315	29	1245
YNL237W	YTP1	chr14	205188	206567	+	HT	316	35	1380
YKL218C	SRY1	chr11	17359	18339	-	HH	3895	44	981
YNL024C-A	KSH1	chr14	586602	586820	-	HT	287	5	219
YDL044C	MTF2;NAM1	chr04	373967	375289	-	HT	391	28	1323
YEL039C	CYC7;CYP3	chr05	79636	79977	-	HH	485	45	342
YOL015W	IRC10	chr15	297078	298838	+	HH	958	17	1761
YBR201W	DER1	chr02	623576	624211	+	HT	429	27	636
YER038C	KRE29	chr05	226858	228252	-	HT	204	47	1395
YIL139C	REV7	chr09	87979	88716	-	HT	514	28	738
YDR381C-A	YDR381C-A	chr04	1238312	1238850	-	HH	642	8	345
YOR126C	IAH1;EST2	chr15	559961	560677	-	HH	493	37	717
YLR046C	YLR046C;L2111	chr12	238001	238813	-	HT	534	25	813
YLR363C	NMD4	chr12	852495	853151	-	HH	310	17	657
YLR342W-A	YLR342W-A	chr12	815810	815983	+	HT	183	1	174
YPR194C	OPT2	chr16	924304	926937	-	HH	4439	46	2634
YHR002W	LEU5	chr08	108812	109885	+	HT	690	16	1074
YHR058C	MED6;MTR32	chr08	218997	219884	-	HH	224	18	888
YJL023C	PET130	chr10	397355	398398	-	HT	539	20	1044
YDR236C	FMN1	chr04	935236	935892	-	HH	723	9	657
YPL222W	FMP40	chr16	130162	132228	+	HH	1024	40	2067
YPR120C	CLB5	chr16	773875	775182	-	HH	3401	18	1308
YLR145W	RMP1	chr12	432168	432773	+	HH	152	16	606
YOL033W	MSE1	chr15	263475	265085	+	HT	271	17	1611
YPL269W	KAR9	chr16	33013	34947	+	HT	210	20	1935
YHL026C	YHL026C	chr08	53219	54166	-	HH	685	28	948
YFR046C	CNN1	chr06	243074	244159	-	HT	120	17	1086
YBR077C	SLM4;EGO3;GSE1	chr02	391805	392293	-	HH	830	34	489
YML107C	PML39	chr13	55265	56269	-	HH	504	35	1005
YOR193W	PEX27	chr15	710446	711576	+	HH	6222	41	1131
YDR357C	CNL1	chr04	1189199	1189567	-	HH	492	34	369
YIL120W	QDR1	chr09	134417	136108	+	HT	545	21	1692
YER170W	ADK2;AKY3;PAK3	chr05	525974	526651	+	HT	215	19	678
YPR027C	YPR027C;YP9367.07c	chr16	620425	621258	-	HH	2269	39	834
YOL001W	PHO80;AGS3;TUP7;VAC5	chr15	325249	326130	+	HH	885	24	882
YHL038C	CBP2	chr08	23617	25509	-	HH	732	16	1893
YJR112W	NNF1	chr10	637030	637635	+	HH	324	50	606
YLR348C	DIC1	chr12	826977	827873	-	HH	857	79	897
YGL061C	DUO1	chr07	388968	389711	-	HH	354	15	744
YKL001C	MET14	chr11	438777	439385	-	HT	1223	101	609
YER116C	SLX8	chr05	395348	396172	-	HH	597	23	825
YPR010C-A	YPR010C-A	chr16	582373	582734	-	HT	328	0	219
YBL060W	YEL1	chr02	107932	109995	+	HH	526	15	2064
YMR204C	INP1	chr13	670063	671325	-	HT	562	12	1263
YMR111C	YMR111C;YM9718.10C	chr13	492404	493792	-	HT	308	20	1389
YNL200C	YNL200C;N1370	chr14	263713	264453	-	HT	473	56	741
YGR031C-A	NAG1	chr07	546809	547300	-	HH	964	6	492
YJL059W	YHC3;BTN1	chr10	324964	326190	+	HT	244	14	1227
YJR102C	VPS25;VPT25	chr10	619157	619765	-	HH	989	28	609
YJR010W	MET3	chr10	456239	457774	+	HH	1558	44	1536
YOL052C-A	DDR2	chr15	231570	231755	-	HT	691	78	186
YDR439W	LRS4	chr04	1339676	1340719	+	HT	290	11	1044
YLR137W	RKM5	chr12	417006	418109	+	HH	348	23	1104
YOL104C	NDJ1;TAM1	chr15	116396	117454	-	HH	6547	86	1059
YMR268C	PRP24	chr13	802888	804222	-	HH	234	9	1335
YBL090W	MRP21;MRP50	chr02	48825	49358	+	HH	197	28	534
YNR048W	YNR048W;N3453	chr14	711630	712811	+	HT	426	11	1182
YML080W	DUS1	chr13	108806	110077	+	HT	274	21	1272
YER173W	RAD24	chr05	536300	538279	+	HH	279	15	1980
YKL159C	RCN1;DSCR1L	chr11	153816	154451	-	HH	540	23	636
YKL048C	ELM1	chr11	347214	349136	-	HH	327	14	1923
YHR134W	WSS1	chr08	371749	372558	+	HH	152	19	810
YOR367W	SCP1	chr15	1026007	1026609	+	HH	435	81	603
YML064C	TEM1	chr13	145139	145876	-	HH	606	30	738
YBR294W	SUL1;SFP2	chr02	789235	791814	+	HT	805	42	2580
YGR063C	SPT4	chr07	617516	617824	-	HT	253	38	309
YPL001W	HAT1	chr16	554605	555729	+	HH	277	16	1125
YMR052W	FAR3	chr13	379586	380200	+	HH	9069	28	615
YOR280C	FSH3	chr15	844992	845792	-	HT	477	29	801
YJL103C	GSM1	chr10	229025	230881	-	HH	420	24	1857
YLR092W	SUL2;SEL2	chr12	323544	326225	+	HT	366	35	2682
YGL144C	ROG1	chr07	232450	234507	-	HT	210	17	2058
YKR085C	MRPL20	chr11	599094	599681	-	HH	176	21	588
YIL073C	SPO22	chr09	222937	225954	-	HH	648	25	2928
YKL108W	SLD2;DRC1	chr11	234426	235787	+	HT	535	18	1362
YKR069W	MET1;MET20	chr11	571612	573393	+	HH	703	39	1782
YKL188C	PXA2;PAT1	chr11	86225	88786	-	HT	498	50	2562
YJR099W	YUH1	chr10	615576	616286	+	HH	420	18	711
YKL090W	CUE2	chr11	271878	273209	+	HH	1228	20	1332
YPL034W	YPL034W	chr16	486712	487209	+	HT	1026	32	498
YBR107C	IML3;MCM19	chr02	453793	454530	-	HH	292	8	738
YDR082W	STN1	chr04	610441	611925	+	HH	360	15	1485
YGL168W	HUR1	chr07	187464	187796	+	HT	125	28	333
YNL148C	ALF1	chr14	349907	350671	-	HH	269	30	765
YPL236C	ENV7	chr16	101608	102702	-	HH	530	15	1095
YPR111W	DBF20	chr16	747306	749000	+	HH	471	13	1695
YMR073C	IRC21	chr13	412268	412873	-	HT	163	15	606
YDR275W	BSC2	chr04	1012252	1012959	+	HT	979	30	708
YNL254C	RTC4	chr14	168043	169248	-	HH	770	21	1206
YCR054C	CTR86	chr03	218376	220067	-	HT	390	15	1692
YER051W	JHD1	chr05	254656	256134	+	HH	269	17	1479
YGR169C	PUS6	chr07	834689	835903	-	HT	484	11	1215
YNR075W	COS10	chr14	779916	781040	+	HH	1178	50	1125
YGR232W	NAS6	chr07	953960	954646	+	HH	480	14	687
YHL024W	RIM4	chr08	56649	58790	+	HT	800	41	2142
YLR021W	IRC25;DMP2;POC3	chr12	183623	184162	+	HH	218	18	540
YLL004W	ORC3;OAF1;OIF1	chr12	141073	142923	+	HH	527	30	1851
YCL027W	FUS1	chr03	71803	73341	+	HT	436	87	1539
YLL002W	RTT109;KIM2;REM50	chr12	146291	147601	+	HT	250	39	1311
YMR003W	AIM34	chr13	273118	273714	+	HT	455	55	597
YHL014C	YLF2	chr08	76097	77314	-	HT	116	29	1218
YDR314C	RAD34	chr04	1090433	1092511	-	HT	230	30	2079
YBR165W	UBS1	chr02	568852	569685	+	HH	426	9	834
YOR144C	ELG1;RTT110	chr15	602717	605092	-	HT	255	10	2376
YJL163C	YJL163C;J0544	chr10	111666	113333	-	HT	545	28	1668
YDR030C	RAD28	chr04	501753	503273	-	HH	225	31	1521
YAL032C	PRP45;FUN20	chr01	83335	84474	-	HT	275	20	1140
YPL191C	YPL191C	chr16	183597	184679	-	HT	638	30	1083
YFL021W	GAT1	chr06	95966	97498	+	HH	956	58	1533
YOL044W	PEX15;PAS21	chr15	247150	248301	+	HT	348	17	1152
YLL012W	YEH1	chr12	125534	127255	+	HH	820	29	1722
YDL018C	ERP3	chr04	422833	423510	-	HH	699	20	678
YHR178W	STB5	chr08	459299	461530	+	HT	1347	22	2232
YMR132C	JLP2	chr13	534944	535570	-	HH	637	21	627
YMR127C	SAS2;ESO1	chr13	522329	523345	-	HH	351	18	1017
YMR279C	YMR279C;YM8021.05C	chr13	824729	826351	-	HT	677	38	1623
YLR424W	SPP382;CCF8;NTR1	chr12	973395	975521	+	HH	225	42	2127
YGR288W	MAL13;MAL1R	chr07	1070293	1071714	+	HH	1302	22	1422
YKR055W	RHO4	chr11	548216	549091	+	HH	291	22	876
YOL023W	IFM1	chr15	278056	280086	+	HT	452	21	2031
YER163C	YER163C;SYGP-ORF3	chr05	503084	503782	-	HH	1610	0	699
YKL194C	MST1	chr11	77258	78646	-	HT	220	17	1389
YDL230W	PTP1	chr04	42700	43707	+	HH	456	15	1008
YGL156W	AMS1	chr07	210416	213667	+	HT	367	40	3252
YLR446W	YLR446W	chr12	1025214	1026515	+	HT	377	19	1302
YAL062W	GDH3	chr01	31567	32940	+	HH	3599	63	1374
YOL005C	RPB11	chr15	315813	316175	-	HH	763	30	363
YIR034C	LYS1	chr09	419615	420736	-	HT	290	75	1122
YGR006W	PRP18	chr07	506070	506825	+	HH	211	13	756
YFR049W	YMR31	chr06	248523	248894	+	HT	389	16	372
YNL158W	PGA1	chr14	339612	340208	+	HH	265	15	597
YJR129C	YJR129C;J2061	chr10	664000	665019	-	HT	199	24	1020
YPR011C	YPR011C;LPZ11C;YP9531.04C	chr16	583062	584042	-	HT	590	18	981
YGR120C	COG2;SEC35	chr07	730033	730821	-	HT	628	28	789
YMR157C	AIM36;FMP39	chr13	571277	572044	-	HH	204	24	768
YBR161W	CSH1	chr02	561634	562764	+	HT	660	24	1131
YLR173W	YLR173W	chr12	502421	504247	+	HH	259	33	1827
YDR118W	APC4	chr04	685882	687840	+	HH	239	15	1959
YDR130C	FIN1	chr04	715747	716622	-	HT	168	11	876
YHR122W	YHR122W	chr08	353625	354320	+	HT	306	0	696
YPL067C	YPL067C	chr16	425251	425847	-	HH	386	45	597
YML077W	BET5	chr13	111865	112344	+	HT	315	29	480
YOR062C	YOR062C;YOR29-13	chr15	442725	443531	-	HH	1155	43	807
YMR106C	YKU80;HDF2	chr13	478301	480190	-	HH	2824	18	1890
YLR381W	CTF3;CHL3	chr12	879723	881924	+	HT	215	10	2202
YGR222W	PET54	chr07	939923	940804	+	HH	931	19	882
YMR154C	RIM13;CPL1	chr13	565999	568182	-	HH	369	19	2184
YMR299C	DYN3	chr13	864412	865350	-	HT	209	21	939
YDR308C	SRB7;MED21	chr04	1078027	1078449	-	HT	599	15	423
YML131W	YML131W;YM4987.04	chr13	10198	11295	+	HT	1815	68	1098
YCR106W	RDS1	chr03	310958	313456	+	HT	803	38	2499
YLR215C	CDC123	chr12	570776	571858	-	HT	238	14	1083
YGR102C	GTF1	chr07	694584	695135	-	HH	282	15	552
YPL095C	EEB1	chr16	368071	369441	-	HT	398	46	1371
YIR015W	RPR2	chr09	381948	382382	+	HT	134	23	435
YGR074W	SMD1	chr07	635712	636152	+	HT	245	11	441
YMR166C	YMR166C;YM8520.15C	chr13	593367	594473	-	HH	413	17	1107
YKR009C	FOX2	chr11	454352	457054	-	HT	1870	34	2703
YPL170W	DAP1	chr16	228314	228772	+	HH	943	52	459
YBR135W	CKS1	chr02	504854	505306	+	HH	567	64	453
YDR533C	HSP31	chr04	1501447	1502160	-	HT	1154	53	714
YLR016C	PML1	chr12	176802	177416	-	HH	192	14	615
YPL005W	AEP3	chr16	548486	550306	+	HT	343	19	1821
YDR438W	THI74	chr04	1338274	1339386	+	HT	500	20	1113
YIL070C	MAM33	chr09	230272	231072	-	HT	481	43	801
YGL212W	VAM7	chr07	91432	92382	+	HH	185	15	951
YOL147C	PEX11;PMP24;PMP27	chr15	47933	48643	-	HH	221	24	711
YKL087C	CYT2	chr11	277189	277863	-	HH	418	40	675
YBR233W	PBP2	chr02	683428	684669	+	HH	338	10	1242
YHR168W	MTG2	chr08	440377	441933	+	HT	250	17	1557
YDR480W	DIG2;RST2	chr04	1417399	1418370	+	HH	525	14	972
YDR240C	SNU56;MUD10	chr04	943674	945152	-	HH	1655	13	1479
YEL023C	YEL023C	chr05	108504	110552	-	HH	869	21	2049
YGR224W	AZR1	chr07	942806	944647	+	HH	591	25	1842
YGL185C	YGL185C;G1380	chr07	153167	154306	-	HT	309	14	1140
YLR251W	SYM1	chr12	641464	642057	+	HT	443	48	594
YGR171C	MSM1	chr07	840824	842551	-	HT	294	11	1728
YBR153W	RIB7	chr02	547460	548194	+	HT	209	24	735
YOR349W	CIN1	chr15	989789	992833	+	HH	1007	32	3045
YBR157C	ICS2	chr02	553543	554310	-	HH	2239	63	768
YNL325C	FIG4	chr14	28739	31378	-	HH	566	17	2640
YJR053W	BFA1	chr10	534027	535751	+	HT	268	23	1725
YGR221C	TOS2	chr07	937124	938992	-	HH	931	40	1869
YFL050C	ALR2	chr06	33272	35848	-	HH	955	16	2577
YPL172C	COX10	chr16	224353	225741	-	HT	428	24	1389
YMR294W	JNM1;INS1	chr13	856966	858087	+	HH	173	12	1122
YGL079W	KXD1	chr07	359444	360100	+	HT	416	17	657
YOL096C	COQ3	chr15	138107	139045	-	HT	182	13	939
YNL316C	PHA2	chr14	42071	43075	-	HT	249	18	1005
YNL304W	YPT11	chr14	60297	61550	+	HH	506	14	1254
YMR163C	INP2	chr13	584271	586388	-	HT	886	15	2118
YOL140W	ARG8	chr15	58759	60030	+	HT	220	37	1272
YER042W	MXR1	chr05	234937	235491	+	HT	197	53	555
YNL111C	CYB5	chr14	416940	417302	-	HT	524	51	363
YPR188C	MLC2	chr16	911988	912479	-	HH	185	9	492
YGR174C	CBP4	chr07	845893	846405	-	HH	250	14	513
YMR262W	YMR262W;YM8156.04	chr13	793726	794667	+	HH	357	14	942
YBR269C	FMP21	chr02	742160	742576	-	HT	185	21	417
YMR036C	MIH1	chr13	341856	343520	-	HT	883	22	1665
YDR525W-A	SNA2	chr04	1490596	1490835	+	HH	798	50	240
YPR186C	PZF1;TFC2;TFIIIA	chr16	909733	911022	-	HH	235	12	1290
YJR057W	CDC8	chr10	544062	544712	+	HH	1560	9	651
YHR166C	CDC23	chr08	437170	439050	-	HH	292	10	1881
YJL193W	YJL193W;J0349	chr10	71366	72574	+	HT	487	28	1209
YLR168C	UPS2;AIM30;GEP1;MSF1	chr12	499578	500270	-	HT	309	73	693
YPR085C	ASA1	chr16	708497	709828	-	HH	273	16	1332
YNL025C	SSN8;GIG3;NUT9;SRB11;UME3	chr14	584320	585291	-	HT	1311	20	972
YDL087C	LUC7;EPE1;EXM2	chr04	300214	300999	-	HH	414	12	786
YLR108C	YLR108C;L2913	chr12	366667	368124	-	HH	657	55	1458
YLL038C	ENT4	chr12	65775	66518	-	HT	227	29	744
YOR163W	DDP1	chr15	642741	643307	+	HH	749	19	567
YPL165C	SET6	chr16	237956	239077	-	HT	273	29	1122
YPL123C	RNY1	chr16	317641	318945	-	HT	281	29	1305
YLL007C	YLL007C;L1353	chr12	134302	136299	-	HH	46	11	1998
YNR022C	MRPL50	chr14	669774	670193	-	HH	225	41	420
YCR097W	HMRA1	chr03	293835	294321	+	HH	297	59	381
YNR065C	YNR065C;N3539	chr14	750350	753700	-	HT	25	0	3351
YDL219W	DTD1	chr04	65242	65765	+	HH	224	18	453
YPL219W	PCL8	chr16	136750	138228	+	HT	307	17	1479
YPL002C	SNF8;VPS22	chr16	553627	554328	-	HH	277	14	702
YDR045C	RPC11	chr04	547978	548310	-	HT	452	15	333
YHL036W	MUP3	chr08	26241	27881	+	HH	732	49	1641
YOL152W	FRE7	chr15	40748	42610	+	HT	5341	63	1863
YPL041C	YPL041C	chr16	475118	475741	-	HT	252	36	624
YGL064C	MRH4	chr07	381523	383208	-	HH	446	21	1686
YOR213C	SAS5	chr15	744535	745281	-	HT	312	20	747
YPL134C	ODC1	chr16	298571	299503	-	HT	385	38	933
YHR144C	DCD1	chr08	387788	388726	-	HH	1574	16	939
YOR026W	BUB3	chr15	379781	380806	+	HT	219	36	1026
YDL008W	APC11	chr04	433497	433994	+	HT	472	12	498
YOR084W	LPX1	chr15	480587	481750	+	HT	167	61	1164
YDR386W	MUS81;SLX3	chr04	1246084	1247982	+	HT	326	26	1899
YDR482C	CWC21	chr04	1420431	1420838	-	HH	319	19	408
YIL055C	YIL055C	chr09	252042	253925	-	HH	1190	34	1884
YIL150C	MCM10;DNA43	chr09	61013	62728	-	HT	300	18	1716
YGL220W	FRA2;AIM15	chr07	82374	82736	+	HH	82	18	363
YOR368W	RAD17	chr15	1026843	1028048	+	HT	234	17	1206
YLR103C	CDC45;SLD4	chr12	343989	345941	-	HH	644	26	1953
YER060W-A	FCY22;FCYX	chr05	276572	278164	+	HT	419	30	1593
YOR159C	SME1	chr15	633282	633566	-	HH	273	8	285
YBR193C	MED8	chr02	609082	609753	-	HH	285	14	672
YLR193C	UPS1	chr12	540009	540536	-	HT	273	30	528
YBR254C	TRS20	chr02	723736	724263	-	HH	193	26	528
YPL076W	GPI2;GCR4	chr16	410443	411285	+	HH	353	39	843
YPL162C	YPL162C	chr16	243206	244027	-	HT	292	22	822
YFL054C	YFL054C	chr06	20847	22787	-	HH	636	35	1941
YER183C	FAU1	chr05	553334	553969	-	HT	2327	12	636
YGR247W	CPD1	chr07	984966	985685	+	HH	694	17	720
YDR370C	DXO1	chr04	1217782	1219110	-	HH	303	50	1329
YOR125C	CAT5;COQ7	chr15	559030	559731	-	HT	230	13	702
YLL055W	YCT1	chr12	30109	31704	+	HH	1804	38	1596
YOR297C	TIM18	chr15	874743	875321	-	HH	278	27	579
YIL093C	RSM25	chr09	187990	188784	-	HH	282	11	795
YDR287W	INM2;IMP2	chr04	1035995	1036873	+	HH	420	53	879
YBR210W	ERV15	chr02	645550	645978	+	HH	3340	40	429
YAL008W	FUN14	chr01	136914	137510	+	HT	281	18	597
YNL129W	NRK1	chr14	381480	382202	+	HH	89	13	723
YNR060W	FRE4	chr14	739951	742110	+	HT	1406	60	2160
YER092W	IES5	chr05	342855	343232	+	HH	688	27	378
YJL006C	CTK2	chr10	423138	424109	-	HH	1048	16	972
YCR046C	IMG1;PETCR46	chr03	209914	210423	-	HT	295	27	510
YGL087C	MMS2	chr07	346406	346904	-	HH	215	34	414
YOL072W	THP1;BUD29	chr15	194970	196337	+	HH	170	22	1368
YLR007W	NSE1	chr12	164392	165402	+	HH	499	16	1011
YJR025C	BNA1;HAD1	chr10	471138	471671	-	HT	12288	70	534
YLL061W	MMP1	chr12	17956	19707	+	HH	343	56	1752
YMR121C	RPL15B;RPL10B;RPL13B;YL10B	chr13	509734	510348	-	HH	967	107	615
YGL243W	TAD1	chr07	43307	44509	+	HT	133	11	1203
YPL109C	YPL109C;LPH17C	chr16	345264	347389	-	HH	1057	34	1974
YJL011C	RPC17	chr10	414285	414770	-	HT	2792	21	486
YPL252C	YAH1	chr16	73363	73881	-	HT	428	45	519
YLR067C	PET309	chr12	267813	270710	-	HH	298	29	2898
YKR053C	YSR3;LBP2	chr11	534067	535281	-	HT	366	46	1215
YNL191W	DUG3	chr14	280432	281505	+	HT	535	38	1074
YPR131C	NAT3	chr16	793911	794498	-	HH	467	14	588
YJL179W	PFD1;GIM6	chr10	88787	89116	+	HH	227	12	330
YLL005C	SPO75	chr12	137940	140546	-	HH	527	30	2607
YDL156W	YDL156W;D1536	chr04	174918	176486	+	HH	330	0	1569
YHR151C	MTC6	chr08	399268	400848	-	HH	586	23	1581
YBR239C	ERT1	chr02	698354	699943	-	HT	547	20	1590
YIL040W	APQ12	chr09	277723	278139	+	HT	218	35	417
YLR141W	RRN5	chr12	423683	424774	+	HH	210	22	1092
YML025C	YML6	chr13	224406	225365	-	HH	524	26	861
YDR020C	DAS2;RRT3	chr04	485746	486444	-	HH	360	27	699
YGR062C	COX18	chr07	616328	617278	-	HT	238	17	951
YOR045W	TOM6;ISP6	chr15	413852	414037	+	HT	372	57	186
YMR077C	VPS20;ASI10;CHM6;VPT20	chr13	421484	422149	-	HT	354	13	666
YOR037W	CYC2	chr15	401555	402655	+	HT	341	24	1101
YJL184W	GON7;LDB6;PCC2	chr10	83448	83819	+	HH	472	30	372
YKL089W	MIF2	chr11	273394	275043	+	HT	185	22	1650
YKL134C	OCT1;MIP1	chr11	189124	191442	-	HT	237	27	2319
YIL114C	POR2	chr09	149143	149988	-	HH	571	57	846
YPL253C	VIK1	chr16	71063	73006	-	HT	357	45	1944
YOR094W	ARF3	chr15	502795	503346	+	HH	343	25	552
YOR083W	WHI5	chr15	479533	480420	+	HH	345	23	888
YJL046W	AIM22	chr10	352386	353615	+	HH	278	7	1230
YGR179C	OKP1	chr07	853675	854895	-	HT	369	9	1221
YNL311C	SKP2	chr14	49397	51688	-	HT	219	29	2292
YOL053W	AIM39	chr15	230085	231272	+	HT	251	16	1188
YJR107W	YJR107W;J1983	chr10	627340	628326	+	HT	325	13	987
YIL152W	YIL152W	chr09	56545	57252	+	HT	166	18	708
YHR171W	ATG7;APG7;CVT2	chr08	445713	447605	+	HT	329	21	1893
YKL189W	HYM1	chr11	84704	85903	+	HT	1154	18	1200
YLR233C	EST1	chr12	607425	609524	-	HH	259	25	2100
YDR197W	CBS2;CBP7	chr04	851228	852397	+	HH	229	13	1170
YGR104C	SRB5;MED18	chr07	697445	698368	-	HH	231	18	924
YLL054C	YLL054C;L0584	chr12	32673	35204	-	HT	299	18	2532
YPR031W	NTO1	chr16	631515	633761	+	HT	270	25	2247
YPL065W	VPS28;VPT28	chr16	427927	428655	+	HT	255	17	729
YOR238W	YOR238W	chr15	783677	784588	+	HT	379	11	912
YDL175C	AIR2	chr04	144484	145518	-	HT	308	19	1035
YOR107W	RGS2	chr15	521353	522282	+	HT	1381	37	930
YPL229W	YPL229W;P1429	chr16	117067	117687	+	HT	580	36	621
YDR090C	YDR090C	chr04	625066	625998	-	HT	710	27	933
YGR036C	CAX4;CWH8	chr07	558149	558868	-	HT	863	25	720
YPR152C	URN1	chr16	832061	833458	-	HH	231	25	1398
YJL180C	ATP12	chr10	87583	88560	-	HH	227	32	978
YLR242C	ARV1	chr12	622918	623883	-	HH	320	17	966
YIL001W	YIL001W;YIA1W	chr09	353940	355481	+	HH	509	13	1542
YMR013C	SEC59	chr13	295179	296738	-	HH	2130	33	1560
YNL278W	CAF120	chr14	113271	116453	+	HT	369	30	3183
YMR287C	DSS1;MSU1	chr13	842436	845345	-	HH	226	21	2910
YCR045C	RRT12;OSW3	chr03	208135	209610	-	HT	304	31	1476
YDR131C	YDR131C	chr04	716790	718460	-	HT	356	20	1671
YJL100W	LSB6	chr10	237263	239086	+	HH	907	22	1824
YJR021C	REC107;MER2	chr10	468555	469579	-	HH	205	16	945
YOL065C	INP54	chr15	204731	205885	-	HT	218	23	1155
YHR001W-A	QCR10	chr08	107826	108122	+	HT	458	62	234
YNL320W	YNL320W;N0342	chr14	37700	38554	+	HT	278	9	855
YGL224C	SDT1;SSM1	chr07	78015	78857	-	HT	255	31	843
YBR211C	AME1;ARP100	chr02	646158	647132	-	HH	754	18	975
YFL046W	FMP32	chr06	42815	43438	+	HT	250	9	624
YOL067C	RTG1	chr15	201985	202518	-	HT	178	20	534
YLR312W-A	MRPL15	chr12	759480	760241	+	HH	647	24	762
YBR137W	YBR137W;YBR1013	chr02	513044	513583	+	HT	270	31	540
YOL117W	RRI2;CSN10	chr15	97551	99488	+	HH	1190	38	1938
YNR041C	COQ2	chr14	700541	701659	-	HH	236	31	1119
YJL071W	ARG2	chr10	306132	307856	+	HH	270	15	1725
YLR136C	TIS11;CTH2	chr12	415801	416658	-	HH	348	70	858
YDR428C	BNA7	chr04	1323454	1324239	-	HT	238	13	786
YDR139C	RUB1	chr04	733618	733924	-	HH	214	38	234
YHR198C	AIM18;FMP22	chr08	496315	497280	-	HT	210	16	966
YGR042W	YGR042W	chr07	579476	580291	+	HT	346	13	816
YJR136C	TTI2	chr10	677441	678706	-	HT	251	20	1266
YLR227C	ADY4	chr12	590562	592043	-	HT	7976	26	1482
YDR065W	RRG1	chr04	580687	581784	+	HT	235	17	1098
YDR198C	RKM2	chr04	852533	853972	-	HT	307	7	1440
YOL102C	TPT1	chr15	125997	126689	-	HT	293	16	693
YBR120C	CBP6	chr02	480435	480923	-	HT	441	16	489
YJR151C	DAN4	chr10	712255	715740	-	HH	1840	48	3486
YJR036C	HUL4	chr10	500713	503391	-	HH	545	21	2679
YNL274C	GOR1	chr14	121118	122170	-	HH	713	53	1053
YMR147W	YMR147W;YM9375.17	chr13	559199	559870	+	HH	675	29	672
YBR197C	YBR197C;YBR1409	chr02	615203	615856	-	HT	271	32	654
YKL170W	MRPL38;MRPL34	chr11	130634	131050	+	HT	373	16	417
YBR253W	SRB6;MED22	chr02	723270	723635	+	HT	216	28	366
YOL025W	LAG2	chr15	274957	276939	+	HH	604	33	1983
YNR007C	ATG3;APG3;AUT1	chr14	639182	640114	-	HH	282	17	933
YDR231C	COX20	chr04	926293	926910	-	HH	542	20	618
YLR210W	CLB4	chr12	562008	563390	+	HH	276	15	1383
YJL173C	RFA3	chr10	96161	96529	-	HH	1208	17	369
YJR083C	ACF4	chr10	582608	583537	-	HH	196	10	930
YPR017C	DSS4	chr16	593486	593917	-	HH	559	33	432
YER180C	ISC10	chr05	549724	550527	-	HT	338	21	804
YBL089W	AVT5	chr02	49574	50953	+	HT	216	10	1380
YDR369C	XRS2	chr04	1215016	1217580	-	HT	202	20	2565
YGR278W	CWC22	chr07	1046731	1048464	+	HH	170	30	1734
YDR400W	URH1	chr04	1271063	1272085	+	HT	330	18	1023
YER147C	SCC4	chr05	462968	464842	-	HH	461	18	1875
YJR004C	SAG1;AGAL1	chr10	442909	444861	-	HH	1062	56	1953
YIR024C	YIR024C	chr09	402841	403491	-	HH	168	14	651
YIR007W	YIR007W;YIB7W	chr09	370704	372998	+	HH	796	21	2295
YOR269W	PAC1;LIS1	chr15	826385	827869	+	HH	453	31	1485
YDL239C	ADY3	chr04	26403	28775	-	HT	210	30	2373
YDR242W	AMD2;AMDY;AMDY1	chr04	946807	948456	+	HH	1655	22	1650
YBL018C	POP8	chr02	185998	186474	-	HT	370	42	402
YJL146W	IDS2	chr10	143292	144701	+	HH	725	19	1410
YOR352W	YOR352W	chr15	997213	998244	+	HH	702	0	1032
YDL220C	CDC13	chr04	62244	65018	-	HH	224	23	2775
YDR142C	PEX7;PAS7;PEB1	chr04	740473	741600	-	HT	442	19	1128
YGR021W	YGR021W	chr07	527632	528504	+	HH	303	19	873
YPR003C	YPR003C;LPZ3C;YP9723.03C	chr16	561504	563768	-	HT	239	20	2265
YJL024C	APS3;YKS7	chr10	395931	396592	-	HT	763	14	585
YBR264C	YPT10	chr02	737770	738369	-	HH	213	52	600
YDR371W	CTS2	chr04	1219413	1220948	+	HH	303	20	1536
YDR132C	YDR132C	chr04	718816	720303	-	HT	2701	27	1488
YDR156W	RPA14	chr04	769525	769938	+	HH	525	35	414
YLR038C	COX12	chr12	224921	225172	-	HT	254	68	252
YNL126W	SPC98	chr14	387227	389767	+	HT	379	25	2541
YDR265W	PEX10;PAS4	chr04	998864	999877	+	HH	541	16	1014
YHR132W-A	IGO2	chr08	370054	370449	+	HH	260	15	396
YDL042C	SIR2;MAR1	chr04	376757	378445	-	HT	429	10	1689
YPL003W	ULA1;ENR2	chr16	552020	553408	+	HH	363	17	1389
YJR054W	YJR054W;J1669	chr10	536056	537549	+	HT	305	0	1494
YPL056C	LCL1	chr16	453430	453735	-	HT	257	42	306
YBR021W	FUR4	chr02	281443	283344	+	HT	836	25	1902
YOR278W	HEM4;ORF1	chr15	842817	843644	+	HT	999	26	828
YML113W	DAT1;DAT	chr13	44045	44791	+	HH	470	49	747
YER184C	YER184C	chr05	556296	558680	-	HH	774	22	2385
YFL014W	HSP12;GLP1;HOR5	chr06	107256	107585	+	HH	1020	109	330
YLR352W	YLR352W	chr12	831116	833539	+	HH	752	30	2424
YBL038W	MRPL16;RML16	chr02	146187	146885	+	HH	459	16	699
YDR270W	CCC2	chr04	1005675	1008689	+	HT	532	31	3015
YDR380W	ARO10	chr04	1234218	1236125	+	HH	701	65	1908
YGL226C-A	OST5	chr07	72749	73158	-	HH	182	20	261
YJL065C	DLS1	chr10	315054	315557	-	HT	202	8	504
YMR282C	AEP2;ATP13	chr13	833356	835098	-	HT	228	16	1743
YGL090W	LIF1	chr07	343319	344584	+	HH	277	10	1266
YNL083W	SAL1	chr14	471377	472861	+	HH	275	19	1485
YBR131W	CCZ1;AUT11;CVT16	chr02	497163	499277	+	HH	294	25	2115
YDR109C	YDR109C	chr04	673520	675667	-	HH	435	10	2148
YGL176C	YGL176C;G1636	chr07	171415	173079	-	HT	206	6	1665
YGR168C	YGR168C	chr07	833352	834482	-	HT	207	22	1131
YDL170W	UGA3	chr04	156318	157904	+	HH	678	33	1587
YOL043C	NTG2;SCR2	chr15	248392	249534	-	HH	291	21	1143
YPL029W	SUV3	chr16	495506	497719	+	HT	260	20	2214
YOR079C	ATX2	chr15	473475	474416	-	HH	178	14	942
YIL010W	DOT5	chr09	334882	335529	+	HT	346	41	648
YGR091W	PRP31	chr07	666341	667825	+	HT	270	22	1485
YMR211W	DML1	chr13	689083	690510	+	HT	218	50	1428
YGL180W	ATG1;APG1;AUT3;CVT10	chr07	160065	162758	+	HT	969	40	2694
YBR063C	YBR063C;YBR0610	chr02	366970	368184	-	HT	400	16	1215
YGR129W	SYF2;NTC31	chr07	750400	751047	+	HH	309	12	648
YPR175W	DPB2	chr16	888974	891043	+	HH	266	15	2070
YJL056C	ZAP1	chr10	330431	333073	-	HH	284	24	2643
YNL011C	YNL011C;N2862	chr14	611836	613170	-	HH	465	17	1335
YMR053C	STB2	chr13	380346	382898	-	HH	405	24	2553
YDR336W	YDR336W	chr04	1145092	1146036	+	HT	250	13	945
YOR324C	FRT1;HPH1	chr15	923232	925040	-	HH	681	80	1809
YOL119C	MCH4	chr15	94856	96361	-	HH	1190	124	1506
YOL135C	MED7	chr15	69376	70044	-	HH	281	15	669
YNL159C	ASI2	chr14	338478	339347	-	HH	265	9	870
YPL133C	RDS2	chr16	299888	301228	-	HH	488	16	1341
YLR438W	CAR2;CARGB	chr12	1012501	1013775	+	HH	478	78	1275
YHR156C	LIN1	chr08	411384	412406	-	HH	501	40	1023
YKL018W	SWD2;CPS35;SAF37	chr11	404102	405091	+	HH	223	28	990
YMR021C	MAC1;CUA1	chr13	317165	318418	-	HH	262	15	1254
YDL043C	PRP11;PRP10;RNA11	chr04	375680	376480	-	HT	277	15	801
YEL005C	VAB2;VAB31	chr05	145907	146755	-	HH	196	25	849
YKL219W	COS9	chr11	14485	15708	+	HH	3259	24	1224
YLR263W	RED1	chr12	670340	672823	+	HH	678	21	2484
YDL017W	CDC7;OAF2	chr04	424209	425732	+	HH	699	17	1524
YDL090C	RAM1;DPR1;SCG2;STE16	chr04	295034	296329	-	HH	491	19	1296
YLR239C	LIP2	chr12	616332	617318	-	HH	215	13	987
YNL046W	YNL046W;N2530	chr14	542304	542822	+	HH	423	23	519
YKR019C	IRS4	chr11	476216	478063	-	HH	275	15	1848
YNL223W	ATG4;APG4;AUT2	chr14	227370	228854	+	HH	271	15	1485
YIL159W	BNR1	chr09	41825	45952	+	HH	381	21	4128
YNL277W	MET2	chr14	117349	118809	+	HT	482	62	1461
YOR296W	YOR296W	chr15	870202	874071	+	HT	308	20	3870
YER087W	AIM10	chr05	330576	332306	+	HT	369	17	1731
YLR119W	SRN2;SRN10;VPS37	chr12	385534	386175	+	HH	126	36	642
YER119C	AVT6	chr05	399496	400842	-	HH	293	39	1347
YPL168W	YPL168W	chr16	231217	232509	+	HH	379	13	1293
YEL029C	BUD16	chr05	96858	97796	-	HH	2973	27	939
YJR030C	YJR030C;J1575L	chr10	483959	486196	-	HT	390	45	2238
YMR055C	BUB2	chr13	386101	387021	-	HT	294	15	921
YJL107C	YJL107C;J0813	chr10	218853	220016	-	HH	1374	40	1164
YDL144C	YDL144C	chr04	198662	199732	-	HH	264	23	1071
YDR237W	MRPL7	chr04	936615	937493	+	HH	723	13	879
YOL164W	BDS1	chr15	6175	8115	+	HT	1863	41	1941
YDR162C	NBP2	chr04	780390	781100	-	HH	323	9	711
YDR256C	CTA1	chr04	968133	969680	-	HT	310	34	1548
YCR079W	PTC6;AUP1;PPP2	chr03	252845	254173	+	HH	217	22	1329
YOR337W	TEA1	chr15	954344	956623	+	HT	474	23	2280
YKR015C	YKR015C	chr11	466961	468667	-	HH	1050	16	1707
YJR056C	YJR056C;J1710	chr10	541792	542502	-	HH	1560	15	711
YNL047C	SLM2;LIT1	chr14	539911	541881	-	HH	423	26	1971
YKL049C	CSE4;CSL2	chr11	346075	346764	-	HT	450	50	690
YHR182W	YHR182W	chr08	468219	470576	+	HT	305	16	2358
YHR172W	SPC97	chr08	448335	450806	+	HT	730	14	2472
YPL098C	MGR2	chr16	364386	364727	-	HH	225	29	342
YKL144C	RPC25	chr11	175843	176481	-	HH	300	28	639
YBR168W	PEX32	chr02	572371	573612	+	HH	481	33	1242
YAL028W	FRT2;HPH2	chr01	92900	94486	+	HH	630	36	1587
YBR241C	YBR241C;YBR1625	chr02	702589	704055	-	HH	615	46	1467
YOR156C	NFI1;SIZ2	chr15	628360	630540	-	HT	426	5	2181
YLR147C	SMD3	chr12	434158	434463	-	HH	178	37	306
YDR448W	ADA2	chr04	1356065	1357369	+	HH	512	21	1305
YNL053W	MSG5	chr14	529942	531411	+	HT	359	40	1470
YOR189W	IES4	chr15	689624	689974	+	HT	444	16	351
YMR306W	FKS3	chr13	881159	886516	+	HH	927	31	5358
YBR278W	DPB3	chr02	760294	760899	+	HH	251	13	606
YOR150W	MRPL23	chr15	611999	612490	+	HH	611	9	492
YMR179W	SPT21	chr13	619858	622134	+	HT	555	45	2277
YLR082C	SRL2	chr12	292394	293572	-	HT	519	30	1179
YJL203W	PRP21;SPP91	chr10	53341	54183	+	HH	190	20	843
YPR178W	PRP4;RNA4	chr16	892332	893729	+	HH	254	6	1398
YOR228C	YOR228C;YOR50-18	chr15	766869	767777	-	HH	632	41	909
YJR116W	TDA4	chr10	640825	641664	+	HT	374	57	840
YKL106W	AAT1	chr11	237536	238891	+	HH	270	39	1356
YKL095W	YJU2;CWC16	chr11	262277	263113	+	HT	426	26	837
YHR091C	MSR1	chr08	284839	286770	-	HT	311	51	1932
YLR170C	APS1;YAP19	chr12	500579	501049	-	HT	211	27	471
YOR292C	YOR292C	chr15	865653	866582	-	HH	516	48	930
YNR074C	AIF1;CPD1	chr14	777602	778738	-	HH	1178	49	1137
YIL122W	POG1	chr09	130610	131665	+	HT	1029	32	1056
YGR049W	SCM4	chr07	591314	591877	+	HT	403	53	564
YBR188C	NTC20;SNT384	chr02	603685	604107	-	HH	401	22	423
YMR283C	RIT1	chr13	835326	836867	-	HH	1320	19	1542
YGR156W	PTI1	chr07	800546	801823	+	HT	480	22	1278
YHR147C	MRPL6	chr08	392639	393283	-	HH	251	39	645
YNR032W	PPG1;PPG	chr14	686010	687116	+	HH	577	18	1107
YIL008W	URM1	chr09	342536	342835	+	HT	1108	45	300
YGL251C	HFM1;MER3	chr07	27921	31636	-	HH	274	13	3564
YNR049C	MSO1	chr14	713023	713655	-	HT	393	23	633
YCL004W	PGS1;PEL1	chr03	109105	110670	+	HT	314	41	1566
YPR172W	YPR172W	chr16	885796	886398	+	HT	238	17	603
YDL216C	RRI1;CSN5;JAB1	chr04	68997	70319	-	HT	321	21	1323
YOR359W	VTS1	chr15	1011189	1012760	+	HT	300	39	1572
YDL149W	ATG9;APG9;AUT9;CVT7	chr04	184925	187918	+	HT	314	23	2994
YLR361C	DCR2	chr12	847388	849124	-	HT	259	23	1737
YPR047W	MSF1	chr16	657529	658938	+	HT	185	28	1410
YJR115W	YJR115W;J2027	chr10	639942	640451	+	HH	967	44	510
YHR118C	ORC6;AAP1	chr08	344321	345628	-	HH	415	62	1308
YAR018C	KIN3;NPK1	chr01	170396	171703	-	HT	508	54	1308
YJR131W	MNS1	chr10	667644	669293	+	HH	507	46	1650
YKL132C	RMA1	chr11	193574	194866	-	HT	422	37	1293
YDL101C	DUN1	chr04	280307	281848	-	HT	264	18	1542
YJL209W	CBP1	chr10	38005	39969	+	HT	271	21	1965
YOL028C	YAP7	chr15	270633	271370	-	HT	633	10	738
YHR159W	TDA11	chr08	417549	419063	+	HH	370	14	1515
YPL128C	TBF1	chr16	306533	308221	-	HT	607	32	1689
YDR459C	PFA5	chr04	1382319	1383443	-	HH	368	14	1125
YDL223C	HBT1;Crem	chr04	57265	60405	-	HT	467	39	3141
YER054C	GIP2	chr05	262052	263698	-	HT	1194	43	1647
YOL007C	CSI2	chr15	311342	312367	-	HT	711	67	1026
YGL229C	SAP4	chr07	64503	66959	-	HH	639	24	2457
YER034W	YER034W	chr05	221846	222403	+	HH	559	19	558
YKL206C	ADD66;PBA2;POC2	chr11	49006	49809	-	HH	242	63	804
YAL048C	GEM1	chr01	52801	54789	-	HT	200	16	1989
YGR215W	RSM27	chr07	922175	922507	+	HT	387	31	333
YHR143W-A	RPC10;RPB12	chr08	387233	387445	+	HT	746	57	213
YLR014C	PPR1	chr12	172268	174982	-	HH	245	20	2715
YPR020W	ATP20	chr16	599870	600217	+	HT	319	61	348
YKL042W	SPC42	chr11	358475	359566	+	HT	627	16	1092
YBL026W	LSM2;SMX5;SNP3	chr02	170623	171038	+	HT	1247	64	288
YJL030W	MAD2	chr10	387657	388247	+	HH	219	22	591
YMR030W	RSF1	chr13	330793	331923	+	HH	562	19	1131
YGR040W	KSS1	chr07	575398	576504	+	HT	14048	31	1107
YDR414C	ERD1	chr04	1295598	1296686	-	HT	351	14	1089
YCR068W	ATG15;AUT5;CVT17	chr03	237214	238776	+	HH	892	42	1563
YHR029C	YHI9	chr08	167677	168561	-	HT	329	39	885
YPL155C	KIP2	chr16	257216	259336	-	HT	378	18	2121
YMR240C	CUS1	chr13	749930	751240	-	HH	721	20	1311
YMR222C	FSH2	chr13	715638	716309	-	HH	406	22	672
YKL217W	JEN1	chr11	22234	24084	+	HH	3895	42	1851
YLR443W	ECM7;ZRG15	chr12	1022625	1023971	+	HH	374	19	1347
YPL138C	SPP1;CPS40;SAF41	chr16	291366	292427	-	HT	390	12	1062
YEL030W	ECM10;SSC3	chr05	94644	96578	+	HT	739	12	1935
YPL248C	GAL4	chr16	79711	82356	-	HT	269	19	2646
YHR011W	DIA4	chr08	127780	129120	+	HT	288	14	1341
YCL005W	LDB16	chr03	108021	108791	+	HT	604	15	771
YDR059C	UBC5	chr04	569234	569770	-	HH	879	19	447
YOR120W	GCY1;GCY	chr15	551114	552052	+	HH	868	31	939
YBL098W	BNA4	chr02	39145	40527	+	HT	455	58	1383
YGL210W	YPT32;YPT11	chr07	93792	94460	+	HT	201	27	669
YGR065C	VHT1	chr07	618077	619858	-	HT	1063	42	1782
YKL093W	MBR1	chr11	264789	265808	+	HT	499	38	1020
YJL083W	TAX4	chr10	278841	280655	+	HH	839	19	1815
YLR078C	BOS1	chr12	285736	286559	-	HH	261	15	735
YOR005C	DNL4;LIG4	chr15	334509	337343	-	HT	337	32	2835
YLR394W	CST9;ZIP3	chr12	907950	909398	+	HT	32	27	1449
YBR046C	ZTA1	chr02	330507	331511	-	HH	322	41	1005
YKL130C	SHE2	chr11	195288	196028	-	HT	321	29	741
YKL124W	SSH4;MLF4	chr11	210593	212332	+	HT	463	23	1740
YKR061W	KTR2	chr11	557677	558954	+	HT	335	51	1278
YAL020C	ATS1	chr01	113614	114615	-	HH	304	13	1002
YIL092W	YIL092W	chr09	189066	190967	+	HH	282	16	1902
YKL155C	RSM22	chr11	159456	161342	-	HH	259	17	1887
YDR204W	COQ4	chr04	858137	859144	+	HH	184	16	1008
YCR066W	RAD18	chr03	231500	232963	+	HT	496	14	1464
YDL129W	YDL129W	chr04	231024	231899	+	HT	497	36	876
YML021C	UNG1	chr13	229734	230813	-	HH	336	23	1080
YFR034C	PHO4	chr06	225020	225958	-	HT	163	33	939
YKL023C-A	YKL023C-A	chr11	393146	393373	-	HH	348	0	228
YJR141W	YJR141W;J2166	chr10	695906	696949	+	HH	210	14	1044
YPR093C	ASR1	chr16	719558	720424	-	HH	213	17	867
YJL051W	IRC8	chr10	339787	342255	+	HT	518	32	2469
YJR133W	XPT1	chr10	672991	673620	+	HT	323	17	630
YJL066C	MPM1	chr10	314114	314872	-	HT	182	23	759
YKL119C	VPH2;CLS10;VMA12	chr11	218570	219217	-	HH	1107	45	648
YIL042C	PKP1	chr09	275108	276292	-	HH	233	26	1185
YBL106C	SRO77;SNI2;SOP2	chr02	10847	13879	-	HT	362	21	3033
YGR057C	LST7	chr07	604773	605501	-	HH	635	15	729
YOR049C	RSB1	chr15	422668	423732	-	HT	1114	42	1065
YOR236W	DFR1	chr15	780906	781541	+	HH	1501	50	636
YML079W	YML079W	chr13	110247	110852	+	HT	170	23	606
YOR143C	THI80	chr15	601383	602342	-	HT	375	14	960
YFR022W	ROG3	chr06	196833	199034	+	HT	519	37	2202
YKL120W	OAC1;PMT;PMT1	chr11	217344	218318	+	HT	644	155	975
YDR375C	BCS1	chr04	1225166	1226536	-	HH	286	17	1371
YIR038C	GTT1	chr09	423809	424513	-	HT	5985	37	705
YOL116W	MSN1;FUP1;PHD2	chr15	99809	100957	+	HT	321	20	1149
YER010C	YER010C	chr05	172634	173338	-	HH	1910	24	705
YPR081C	GRS2	chr16	702114	703970	-	HT	255	14	1857
YBR090C	YBR090C;YBR0811B	chr02	426333	427058	-	HT	97	52	369
YKR007W	MEH1;EGO1;GSE2	chr11	451434	451988	+	HH	217	16	555
YDL089W	NUR1	chr04	296820	298274	+	HH	491	19	1455
YML005W	TRM12;TYW2	chr13	260221	261609	+	HH	1805	17	1389
YDL123W	SNA4	chr04	241418	241840	+	HT	221	23	423
YOL034W	SMC5	chr15	259923	263204	+	HT	893	23	3282
YKL138C	MRPL31	chr11	185286	185681	-	HH	276	42	396
YNL299W	TRF5	chr14	66517	68445	+	HT	465	15	1929
YPR140W	TAZ1	chr16	814391	815536	+	HH	333	16	1146
YDR499W	LCD1;DDC2;PIE1	chr04	1447830	1450073	+	HH	836	14	2244
YPL103C	FMP30	chr16	358000	359406	-	HH	803	12	1407
YCR090C	YCR090C;YCR1104;YCR90C	chr03	272315	272863	-	HH	1541	24	549
YDL233W	MFG1	chr04	36797	38173	+	HH	320	15	1377
YLR431C	ATG23;CVT23	chr12	1000342	1001703	-	HH	854	19	1362
YNL090W	RHO2	chr14	456565	457143	+	HT	435	45	579
YLR438C-A	LSM3;SMX4;USS2	chr12	1013909	1014178	-	HH	313	56	270
YFR011C	AIM13	chr06	166746	167258	-	HH	630	38	513
YKL072W	STB6	chr11	299582	301882	+	HT	507	34	2301
YDR383C	NKP1	chr04	1239960	1240676	-	HT	528	14	717
YOL069W	NUF2	chr15	198942	200297	+	HH	217	26	1356
YNL095C	YNL095C;N2215	chr14	444912	446840	-	HH	771	25	1929
YBR104W	YMC2	chr02	449667	450656	+	HT	351	31	990
YBR293W	VBA2	chr02	787006	788430	+	HH	2434	32	1425
YCL049C	YCL049C;YCL49C	chr03	39786	40724	-	HH	764	46	939
YJL049W	YJL049W;J1162	chr10	345973	347325	+	HT	230	22	1353
YMR026C	PEX12	chr13	324236	325435	-	HH	442	18	1200
YER146W	LSM5	chr05	462585	462866	+	HH	845	59	282
YDR021W	FAL1	chr04	486804	488003	+	HH	360	14	1200
YNL286W	CUS2	chr14	95223	96080	+	HT	422	9	858
YPR162C	ORC4	chr16	866715	868304	-	HT	341	6	1590
YER115C	SPR6	chr05	394292	394867	-	HT	481	12	576
YHR120W	MSH1	chr08	349574	352453	+	HT	289	16	2880
YBL075C	SSA3	chr02	84499	86448	-	HT	274	32	1950
YML060W	OGG1	chr13	151871	153001	+	HH	339	12	1131
YGR181W	TIM13	chr07	858287	858604	+	HH	1986	48	318
YPL040C	ISM1	chr16	475993	479001	-	HH	224	36	3009
YPR199C	ARR1;ACR1;YAP8	chr16	938148	939032	-	HT	247	11	885
YPL007C	TFC8	chr16	542082	543848	-	HH	783	17	1767
YHR096C	HXT5	chr08	294669	296447	-	HT	938	60	1779
YBR259W	YBR259W;YBR1727	chr02	730387	732453	+	HH	225	7	2067
YBR138C	YBR138C;YBR1014	chr02	513762	515336	-	HH	328	21	1575
YAL010C	MDM10	chr01	134184	135665	-	HH	189	30	1482
YLR437C	DIF1	chr12	1011622	1012023	-	HH	478	52	402
YNL213C	RRG9	chr14	246460	247104	-	HH	357	13	645
YCL044C	MGR1	chr03	47111	48364	-	HT	289	27	1254
YLR343W	GAS2	chr12	816094	817761	+	HT	111	89	1668
YDR043C	NRG1;MSS1	chr04	542674	543369	-	HH	3273	163	696
YHL048W	COS8	chr08	6401	7546	+	HH	604	69	1146
YGR084C	MRP13	chr07	647123	648142	-	HT	241	19	1020
YOL133W	HRT1;RBX1;ROC1	chr15	70325	70690	+	HH	281	22	366
YGR068C	ART5	chr07	625324	627084	-	HH	722	25	1761
YOR173W	DCS2	chr15	657264	658325	+	HT	694	54	1062
YER048W-A	ISD11	chr05	250718	251002	+	HH	2561	35	285
YJL210W	PEX2;CRT1;PAS5	chr10	36919	37734	+	HH	670	26	816
YOL003C	PFA4	chr15	321858	322994	-	HT	417	30	1137
YDR378C	LSM6	chr04	1229349	1229609	-	HH	558	48	261
YOR011W	AUS1	chr15	349679	353863	+	HH	2729	42	4185
YLR212C	TUB4	chr12	564860	566281	-	HT	373	41	1422
YBR257W	POP4	chr02	728885	729724	+	HH	783	15	840
YLR098C	CHA4;SIL2;SIL3	chr12	337527	339473	-	HT	271	29	1947
YDR415C	YDR415C	chr04	1297037	1298161	-	HH	271	9	1125
YDL165W	CDC36;DNA19;NOT2	chr04	164290	164865	+	HH	248	8	576
YDL108W	KIN28	chr04	267698	268699	+	HH	497	16	921
YKR051W	YKR051W	chr11	530946	532202	+	HT	462	14	1257
YHR112C	YHR112C	chr08	334527	335663	-	HH	674	44	1137
YJL099W	CHS6;CSD3	chr10	239414	241654	+	HT	328	13	2241
YPL059W	GRX5	chr16	444579	445031	+	HT	8815	35	453
YBR098W	MMS4;SLX2	chr02	441515	443590	+	HT	200	28	2076
YBR024W	SCO2	chr02	289445	290350	+	HH	1520	22	906
YJL149W	DAS1	chr10	137379	139370	+	HH	606	35	1992
YDR520C	URC2	chr04	1481085	1483403	-	HT	392	15	2319
YPL271W	ATP15	chr16	30079	30267	+	HH	1915	64	189
YMR097C	MTG1	chr13	459424	460527	-	HT	244	27	1104
YML068W	ITT1	chr13	137550	138944	+	HT	392	9	1395
YIL104C	SHQ1	chr09	169982	171505	-	HH	246	10	1524
YIR036C	IRC24	chr09	422074	422865	-	HH	263	38	792
YGL125W	MET13;MET11;MRPL45	chr07	272520	274322	+	HT	381	33	1803
YIL071C	PCI8;CSN11;YIH1	chr09	228660	229994	-	HT	278	49	1335
YHL031C	GOS1	chr08	38815	39486	-	HH	598	41	672
YPR158W	CUR1	chr16	843262	844020	+	HT	593	40	759
YER024W	YAT2	chr05	202192	204963	+	HT	256	28	2772
YBR252W	DUT1	chr02	722611	723054	+	HT	298	38	444
YIL111W	COX5B	chr09	155222	155765	+	HT	376	40	456
YGR029W	ERV1	chr07	543553	544205	+	HT	262	12	570
YMR281W	GPI12	chr13	832339	833253	+	HH	1010	21	915
YER075C	PTP3	chr05	308413	311199	-	HT	1391	21	2787
YDR318W	MCM21;CTF5	chr04	1103758	1104947	+	HT	330	11	1107
YPR100W	MRPL51	chr16	729791	730213	+	HH	263	13	423
YPR049C	ATG11;CVT9	chr16	661137	664673	-	HH	287	24	3537
YLR135W	SLX4	chr12	413281	415527	+	HT	867	11	2247
YMR224C	MRE11	chr13	718575	720653	-	HT	307	16	2079
YOR223W	YOR223W;YOR50-13	chr15	759782	760660	+	HT	529	30	879
YER134C	YER134C	chr05	437267	437803	-	HH	1813	16	537
YDL001W	RMD1	chr04	447984	449276	+	HH	406	28	1293
YFL029C	CAK1;CIV1	chr06	78055	79161	-	HT	183	19	1107
YJL213W	YJL213W;HRC331;J0234	chr10	32163	33158	+	HT	3567	36	996
YHR187W	IKI1;ELP5;HAP2;TOT5	chr08	480990	481919	+	HH	318	34	930
YPL120W	VPS30;APG6;ATG6;VPT30	chr16	322071	323744	+	HH	441	33	1674
YBL019W	APN2;ETH1	chr02	184353	185915	+	HT	228	15	1563
YDL138W	RGT2	chr04	213351	215642	+	HH	1305	16	2292
YOR205C	GEP3;AIM40;FMP48	chr15	725564	727234	-	HH	278	75	1671
YGR275W	RTT102	chr07	1043276	1043749	+	HH	181	28	474
YGR268C	HUA1	chr07	1026057	1026653	-	HH	717	40	597
YDR084C	TVP23	chr04	613405	614004	-	HT	284	36	600
YIL067C	YIL067C	chr09	235724	237760	-	HT	339	38	2037
[truncated: 3,744 more rows]
