# Supplementary material for: Mutational sources of trans-regulatory variation affecting gene expression in Saccharomyces cerevisiae
Source: eLife. 2021 Aug 31;10:e67806. doi: 10.7554/eLife.67806 (PMC8456550; doi:10.7554/eLife.67806)
Supplement: Supplementary file 12. [file elife-67806-supp12.bz2 › Input_Files/Network/GeneListAnalysis.txt]

GENE	SHORT	CHR	START	STOP	DIRECTION	ORIENTATION	LENGTH.CIS	N.TRANS.FACTORS	LENGTH.CDS	LENGTH.TRANS.CDS	LENGTH.TRANS.CIS	LENGTH.TRANS.ALL	TATA.CLASS	TATA	SAGA	TATA.BIS	TATA.MISMATCH	TAF1.CLASS	MK.ALPHA	MK.P.VALUE	GEI.CLASS	F.ENV	P.ENV	F.GEN	F.GXE	P.GXE	G.EXPR.VAR	N.GENOTYPES	G.EXPR.F	G.EXPR.PVAL	MEAN.EXPR.SKELLY	VAR.EXPR.SKELLY	CV.EXPR.SKELLY	MEAN.GFP	CV.GFP	DM.GFP	DELETION	CLASS	FITNESS.HOMO	FITNESS.HET	SYN.INTERACTIONS	N.TRANSCRIPTS	MAX.COPY	DUPLICATE	DIST.TSS.ATG	N.NUCLEOSOME.PROMOTER	DENSITY.NUCLEOSOME.PROMOTER	N.NUCLEOSOME.WINDOW	DIST.ATG.PLUS1	DIST.ATG.MINUS1	DIST.TSS.PLUS1	DIST.TSS.MINUS1	MID	MID.ATG.DISTANCE	NDR	NUCLEOSOME.CLASS	DISTANCE.TIP	PLASTICITY.VAR	PERCENT.CHEM.HET	VM.LOW	VM.MED	VM.HIGH	VM.LANDRY	RECOMBI	N.pQTLs	RPKM.BRIAN	COUNTS.BRIAN
YDR039C	ENA2;PMR2B	chrIV	531307	534582	-	HT	610	34	3276	24702	15173	39875	0	NO	TFIID	NA	NA	NA	NA	1	G+E	40.52592	0	6.994266	2.968444	0.008544331	1.896681614	16	NA	NA	0.716675597	1.883589913	1.91500786	44.5	NA	NA	NA	NA	NA	NA	NA	NA	NA	NA	-96	4	0.006557377	5	96	57	39	71	183	-398	NO	OPN	531307	0.34086	NA	3.03E-05	1.94E-05	1.93E-05	6.17E-05	3	NA	0	0
YBR115C	LYS2	chrII	469748	473926	-	HT	466	16	4179	25254	18232	43486	1	YES	SAGA	TATA-containing	0	TAF1-depleted	NA	7.86E-05	NA	NA	NA	NA	NA	NA	0.451866067	17	4.883	1.70E-05	7.721286917	0.016912118	0.016842607	680	20.78	4.941	Lethal	NA	0	NA	NA	NA	205.5	N	-87	2	0.004291845	3	100	71	16	317	333	-146	YES	DPN	339258	0.38126	0.025862069	0.000133839	2.10E-05	0.00070821	2.86E-06	3	NA	0	0
YCR096C	HMRA2	chrIII	293179	293538	-	HH	297	44	360	44847	22863	67710	0	NO	SAGA	NA	NA	NA	NA	NA	NA	NA	NA	NA	NA	NA	0.199653819	17	3.906	0.000301	NA	NA	NA	NA	NA	NA	NA	NA	NA	NA	NA	NA	280.6	NA	-142	1	0.003367003	4	59	155	201	13	226	-380	YES	UNCLEAR	23082	0.21754	NA	4.40E-05	2.35E-05	4.13E-05	7.46E-05	2	NA	0	0
YHR214C-D	YHR214C-D	chrVIII	550648	550941	-	HT	259	2	294	4503	1230	5733	NA	NA	NA	NA	NA	NA	NA	NA	NA	NA	NA	NA	NA	NA	NA	NA	NA	NA	NA	NA	NA	NA	NA	NA	NA	NA	NA	NA	NA	NA	230.9	NA	-49	2	0.007722008	5	90	60	139	11	186	-380	NO	OPN	11702	NA	NA	0.000184668	2.61E-05	2.25E-05	NA	NA	NA	0	0
YLR157C	ASP3-2	chrXII	472969	474057	-	HH	1707	54	1089	49686	32856	82542	0	NA	TFIID	NA	NA	NA	NA	NA	NA	NA	NA	NA	NA	NA	2.068609341	14	NA	NA	NA	NA	NA	NA	NA	NA	NA	NA	NA	NA	NA	NA	254.8	NA	-112	3	0.001757469	0	424	845	536	733	NA	NA	NA	NA	472969	0.4593	NA	4.74E-05	3.17E-05	0.000137982	0.000979174	3	NA	0	0
YLR158C	ASP3-3	chrXII	482549	483637	-	HH	1708	47	1089	43497	16622	60119	0	NA	TFIID	NA	NA	NA	NA	NA	NA	NA	NA	NA	NA	NA	1.902204975	14	NA	NA	NA	NA	NA	NA	NA	NA	NA	NA	NA	NA	51	NA	240.4	NA	NA	1	0.00058548	0	424	846	NA	NA	NA	NA	NA	NA	482549	0.58005	NA	4.64E-05	3.34E-05	0.00015477	0.000632529	NA	NA	0	0
YLR160C	ASP3-4	chrXII	486201	487289	-	HH	1708	43	1089	35643	14108	49751	0	NA	TFIID	NA	NA	NA	NA	NA	NA	NA	NA	NA	NA	NA	1.813714882	14	NA	NA	NA	NA	NA	NA	NA	NA	NA	NA	NA	NA	27	NA	263.5	NA	-264	10	0.005854801	4	83	90	58	231	289	-281	YES	UNCLEAR	486201	0.57441	NA	4.52E-05	3.38E-05	0.000149043	0.000244063	1	NA	0	0
YCR039C	MATALPHA2;ALPHA-2;MAT2A;MATAL2	chrIII	199546	200178	-	HH	264	41	633	41097	18401	59498	0	NO	SAGA	NA	NA	NA	NA	1	NA	NA	NA	NA	NA	NA	0.128342857	15	NA	NA	NA	NA	NA	NA	NA	NA	NA	NA	NA	NA	NA	NA	NA	NA	128	1	0.003787879	4	26	229	55	102	255	-49	YES	DPN	116442	0.30126	NA	3.85E-05	3.67E-05	3.79E-05	8.29E-05	2	NA	0	0
YHR213W-A	YHR213W-A	chrVIII	540549	540782	+	HT	802	3	234	4425	2454	6879	NA	NA	NA	NA	NA	NA	NA	NA	NA	NA	NA	NA	NA	NA	NA	NA	NA	NA	NA	NA	NA	NA	NA	NA	NA	NA	NA	NA	NA	NA	205.6	NA	NA	4	0.004987531	4	56	203	NA	NA	259	-19	YES	DPN	21861	NA	NA	0.00039821	3.96E-05	3.73E-05	NA	NA	NA	0	0
YCL069W	VBA3	chrIII	9706	11082	+	HH	1380	22	1377	22362	12171	34533	0	NO	TFIID	NA	NA	NA	NA	NA	NA	NA	NA	NA	NA	NA	0.957008168	10	NA	NA	1.67743357	0.041071493	0.120816128	NA	NA	NA	Lethal	NA	1.02916	0.99309	19	NA	227.8	Y	NA	8	0.005797101	4	25	128	NA	NA	188	-203	NO	OPN	9706	0.39479	0.017241379	6.33E-05	4.54E-05	1.72E-05	0.005875238	3	NA	0	0
YLR157W-E	YLR157W-E	chrXII	481873	482037	+	HT	5897	2	165	2115	994	3109	NA	NA	NA	NA	NA	NA	NA	NA	NA	NA	NA	NA	NA	NA	NA	NA	NA	NA	NA	NA	NA	NA	NA	NA	NA	NA	NA	NA	NA	NA	188.1	NA	-75	29	0.004917755	2	820	411	895	336	173	-486	NA	NA	481873	NA	NA	0.000221888	7.07E-05	8.01E-05	NA	NA	NA	0	0
YLR156C-A	YLR156C-A	chrXII	472479	472610	-	HT	359	0	132	0	0	0	NA	NA	NA	NA	NA	NA	NA	NA	NA	NA	NA	NA	NA	NA	NA	NA	NA	NA	NA	NA	NA	NA	NA	NA	NA	NA	NA	NA	NA	NA	176.7	NA	NA	0	0	1	157	503	NA	NA	NA	NA	NA	NA	472479	NA	NA	0.000160634	7.55E-05	0.000134688	NA	NA	NA	0	0
YLR159W	YLR159W;L9632.4	chrXII	485345	485689	+	HH	1708	53	345	64590	36592	101182	0	NA	TFIID	NA	NA	NA	NA	NA	NA	NA	NA	NA	NA	NA	2.365958333	4	NA	NA	NA	NA	NA	NA	NA	NA	NA	NA	NA	NA	NA	NA	301.9	NA	NA	1	0.00058548	1	7	862	NA	NA	NA	NA	NA	NA	485345	0.79092	NA	0.000190718	7.95E-05	0.000238778	0.000140333	1	NA	0	0
YAL067W-A	YAL067W-A	chrI	2480	2707	+	HH	311	3	228	2436	672	3108	NA	NA	NA	NA	NA	NA	NA	NA	NA	NA	NA	NA	NA	NA	NA	NA	NA	NA	NA	NA	NA	NA	NA	NA	Lethal	NA	NA	NA	NA	NA	156.6	Y	NA	2	0.006430868	4	203	55	NA	NA	184	-313	NO	OPN	2480	NA	NA	0.0001136	8.12E-05	0.000135436	NA	NA	NA	0	0
YHR053C	CUP1-1;MTH1	chrVIII	212535	212720	-	HT	465	127	186	124254	48245	172499	1	YES	TFIID	NA	NA	NA	NA	NA	G+E	40.52592	0	6.994266	2.968444	0.008544331	1.157317787	17	3.628	0.000452	3.10752081	2.111186418	0.467572807	NA	NA	NA	NA	NA	NA	NA	NA	NA	102.5	NA	-59	1	0.002150538	3	51	344	110	285	395	-24	YES	DPN	212535	0.97824	NA	9.66E-05	8.15E-05	0.000600678	0.000354525	3	NA	0	0
YHR055C	CUP1-2;MTH1	chrVIII	214533	214718	-	HT	465	118	186	114918	45899	160817	2	YES	SAGA	NA	NA	NA	NA	NA	G+E	40.52592	0	6.994266	2.968444	0.008544331	0.77054949	17	1.594	0.112891	2.608058469	1.380856751	0.45056452	NA	NA	NA	NA	NA	NA	NA	NA	NA	145.1	NA	-59	2	0.004301075	4	51	91	110	32	253	-166	YES	UNCLEAR	214533	0.96367	NA	9.42E-05	8.47E-05	0.000615988	0.000266429	3	NA	0	0
YOR394C-A	YOR394C-A	chrXV	1084202	1084369	-	HH	1104	2	168	4473	2890	7363	NA	NA	NA	NA	NA	NA	NA	NA	NA	NA	NA	NA	NA	NA	NA	NA	NA	NA	NA	NA	NA	NA	NA	NA	NA	NA	NA	NA	NA	NA	144.5	NA	NA	4	0.003623188	2	59	80	NA	NA	139	-16	NO	OPN	6922	NA	NA	0.00012783	8.57E-05	7.55E-05	NA	NA	NA	0	0
YPL281C	ERR2	chrXVI	9557	10870	-	HH	1017	61	1314	64449	33601	98050	2	YES	SAGA	NA	NA	NA	NA	NA	NA	NA	NA	NA	NA	NA	0.218766667	4	NA	NA	2.478566402	0.092979734	0.123025062	NA	NA	NA	NA	NA	NA	NA	NA	NA	188.1	NA	NA	6	0.005899705	5	53	119	NA	NA	172	-22	NO	OPN	9557	1.0955	NA	0.000278355	9.12E-05	0.000395458	NA	1	NA	0	0
YPL280W	HSP32	chrXVI	11887	12600	+	HH	1017	49	714	48846	25087	73933	0	NO	TFIID	NA	NA	NA	NA	NA	NA	NA	NA	NA	NA	NA	5.964825	4	NA	NA	3.001755137	0.319057655	0.188173872	NA	NA	NA	NA	NA	NA	NA	NA	NA	159.9	NA	NA	6	0.005899705	5	23	148	NA	NA	171	-52	NO	OPN	11887	1.5354	NA	0.000317191	9.41E-05	0.000306	7.70E-05	3	NA	0	0
YOR393W	ERR1	chrXV	1080276	1081589	+	HH	1018	54	1314	66714	27969	94683	2	YES	SAGA	NA	NA	NA	NA	NA	NA	NA	NA	NA	NA	NA	0.048994275	14	NA	NA	1.808133449	0.131208941	0.200332419	NA	NA	NA	NA	NA	NA	NA	319	NA	196.1	NA	NA	5	0.004911591	4	51	121	NA	NA	182	-357	NO	OPN	9702	0.60803	NA	0.000283181	9.60E-05	0.000405849	3.73E-05	1	NA	0	0
YJL221C	IMA4;FSP2	chrX	16767	18536	-	HH	961	36	1770	34632	16509	51141	2	YES	NA	NA	NA	NA	NA	NA	NA	NA	NA	NA	NA	NA	0.4558562	15	NA	NA	NA	NA	NA	NA	NA	NA	NA	NA	NA	NA	NA	NA	147.6	NA	-288	6	0.006243496	4	57	86	202	75	277	-161	YES	UNCLEAR	16767	0.92975	NA	8.04E-05	0.000100937	4.21E-05	0.0001665	3	NA	0	0
YPL282C	PAU22	chrXVI	7933	8427	-	HT	1130	31	495	33078	18885	51963	0	NO	TFIID	NA	NA	NA	NA	NA	NA	NA	NA	NA	NA	NA	5.066844218	8	NA	NA	NA	NA	NA	NA	NA	NA	NA	NA	NA	NA	NA	NA	145	NA	NA	6	0.005309735	4	58	123	NA	NA	267	-198	YES	UNCLEAR	7933	0.28275	NA	0.000181486	0.000101215	0.000486684	0.000147369	1	NA	0	0
YLR461W	PAU4	chrXII	1062919	1063281	+	HH	2032	73	363	77253	31849	109102	2	YES	SAGA/TFIID	NA	NA	NA	NA	NA	G+E	40.52592	0	6.994266	2.968444	0.008544331	0.477442988	17	3.488	9.00E-04	2.383874857	0.555933523	0.31277208	NA	NA	NA	Lethal	NA	1.0316	NA	119	NA	182	Y	NA	12	0.005905512	4	109	44	NA	NA	180	-119	NO	OPN	14896	0.2604	0.034482759	0.000108021	0.00010456	0.000443508	5.35E-06	1	NA	0	0
YNL067W-B	YNL067W-B;YNL067W-A	chrXIV	499417	499557	+	HH	1128	8	141	7314	1781	9095	NA	NA	NA	NA	NA	NA	NA	NA	NA	NA	NA	NA	NA	NA	NA	NA	NA	NA	NA	NA	NA	NA	NA	NA	Lethal	NA	NA	NA	NA	NA	252.1	N	NA	5	0.004432624	4	31	77	NA	NA	211	-310	UNCLEAR	UNCLEAR	284776	NA	NA	0.000164222	0.000105445	0.000442259	NA	NA	NA	0	0
YLR157W-D	YLR157W-D	chrXII	475764	475976	+	HH	1707	0	213	0	0	0	NA	NA	NA	NA	NA	NA	NA	NA	NA	NA	NA	NA	NA	NA	NA	NA	NA	NA	NA	NA	NA	NA	NA	NA	NA	NA	NA	NA	NA	NA	139.4	NA	NA	3	0.001757469	3	60	48	NA	NA	275	-123	YES	DPN	475764	NA	NA	0.000154217	0.000117626	6.46E-05	NA	NA	NA	0	0
YLR157C-C	YLR157C-C	chrXII	482059	482190	-	HT	359	0	132	0	0	0	NA	NA	NA	NA	NA	NA	NA	NA	NA	NA	NA	NA	NA	NA	NA	NA	NA	NA	NA	NA	NA	NA	NA	NA	NA	NA	NA	NA	NA	NA	161.2	NA	NA	0	0	1	728	503	NA	NA	NA	NA	NA	NA	482059	NA	NA	0.000506111	0.00012241	0.000116664	NA	NA	NA	0	0
YIL172C	IMA3	chrIX	16784	18553	-	HT	4566	50	1770	50673	21178	71851	2	YES	TFIID	NA	NA	NA	NA	NA	NA	NA	NA	NA	NA	NA	0.332002203	15	NA	NA	NA	NA	NA	NA	NA	NA	NA	NA	NA	NA	NA	NA	184.2	NA	NA	23	0.005037232	4	0	0	NA	NA	229	-332	YES	UNCLEAR	16784	0.63975	NA	5.90E-05	0.000124333	3.35E-05	0.001179308	3	NA	0	0
YOR192C-C	YOR192C-C	chrXV	703988	704224	-	HH	6222	4	237	3252	1269	4521	NA	NA	NA	NA	NA	NA	NA	NA	NA	NA	NA	NA	NA	NA	NA	NA	NA	NA	NA	NA	NA	NA	NA	NA	NA	NA	NA	NA	NA	NA	154.9	NA	-115	37	0.005946641	5	88	31	84	70	156	-382	NO	OPN	387067	NA	NA	0.000258297	0.000131558	0.000107285	NA	NA	NA	0	0
YDL246C	SOR2	chrIV	8683	9756	-	HT	1901	35	1074	32964	17952	50916	2	YES	SAGA/TFIID	NA	NA	NA	NA	NA	NA	NA	NA	NA	NA	NA	1.553977133	10	NA	NA	2.20210524	0.096820193	0.141300892	NA	NA	NA	NA	NA	NA	NA	83	NA	285.1	NA	NA	8	0.004208311	1	12	606	NA	NA	NA	NA	NA	NA	8683	0.51818	NA	7.22E-05	0.000134825	4.58E-05	0.109812853	1	NA	0	0
YHR212W-A	YHR212W-A	chrVIII	538742	538945	+	HT	10123	7	204	8955	12362	21317	NA	NA	NA	NA	NA	NA	NA	NA	NA	NA	NA	NA	NA	NA	NA	NA	NA	NA	NA	NA	NA	NA	NA	NA	NA	NA	NA	NA	NA	NA	263.5	NA	NA	60	0.005927097	5	132	43	NA	NA	165	-242	NO	OPN	23698	NA	NA	9.97E-05	0.000134982	8.42E-05	NA	NA	NA	0	0
YHR213W	YHR213W	chrVIII	539151	539747	+	HT	206	33	597	27948	12669	40617	0	NO	TFIID	NA	NA	NA	NA	NA	G+E	40.52592	0	6.994266	2.968444	0.008544331	1.390895283	14	NA	NA	1.679519109	1.345614246	0.690677548	NA	NA	NA	NA	NA	NA	NA	NA	NA	180	NA	NA	1	0.004854369	5	12	117	NA	NA	175	-352	NO	OPN	22896	0.42637	NA	0.000184228	0.000138432	3.40E-05	3.05E-06	2	NA	0	0
YNL335W	DDI3	chrXIV	11452	12129	+	HT	1977	40	678	49218	19925	69143	2	YES	SAGA/TFIID	NA	NA	NA	NA	NA	NA	NA	NA	NA	NA	NA	0.466061071	13	NA	NA	NA	NA	NA	NA	NA	NA	Lethal	NA	1.02094	0.97927	NA	NA	182.7	Y	-4	11	0.005563986	4	34	119	38	115	183	-194	NO	OPN	11452	0.38288	0.074712644	0.00017872	0.000159076	4.56E-05	6.41E-05	3	NA	0	0
YLR159C-A	YLR159C-A	chrXII	485711	485842	-	HT	359	1	132	2115	994	3109	NA	NA	NA	NA	NA	NA	NA	NA	NA	NA	NA	NA	NA	NA	NA	NA	NA	NA	NA	NA	NA	NA	NA	NA	NA	NA	NA	NA	NA	NA	124.9	NA	NA	2	0.005571031	4	93	218	NA	NA	311	18	YES	DPN	485711	NA	NA	0.000190164	0.000177509	8.98E-05	NA	NA	NA	0	0
YPL283C	YRF1-7	chrXVI	280	6007	-	HT	1926	83	5580	92376	40338	132714	0	NO	TFIID	NA	NA	NA	NA	NA	NA	NA	NA	NA	NA	NA	0.845159506	17	18.693	0	NA	NA	NA	NA	NA	NA	NA	NA	NA	NA	NA	NA	97.1	NA	-75	6	0.003115265	0	NA	1048	NA	973	NA	NA	NA	NA	280	0.42271	NA	0.000309627	0.00020993	0.000189963	NA	1	NA	0	0
YOL155W-A	YOL155W-A;NOL049W	chrXV	27084	27218	+	HT	108	5	135	5526	4123	9649	NA	NA	NA	NA	NA	NA	NA	NA	NA	NA	NA	NA	NA	NA	NA	NA	NA	NA	NA	NA	NA	NA	NA	NA	NA	NA	NA	NA	NA	NA	155.7	NA	NA	1	0.009259259	4	154	24	NA	NA	200	-250	NO	OPN	27084	NA	NA	0.000244225	0.000233906	0.000525018	NA	NA	NA	0	0
YOR394W	PAU21	chrXV	1082718	1083212	+	HT	1129	44	495	43443	18444	61887	0	NO	TFIID	NA	NA	NA	NA	NA	NA	NA	NA	NA	NA	NA	3.670418566	17	3.088	0.040368	NA	NA	NA	NA	NA	NA	NA	NA	NA	NA	NA	NA	152.7	NA	NA	4	0.003542958	4	56	125	NA	NA	239	-200	YES	UNCLEAR	8079	0.6485	NA	0.000126568	0.00023518	0.000381833	0.000282449	1	NA	0	0
YML132W	COS3	chrXIII	7244	8383	+	HH	2560	56	1140	54909	25722	80631	2	YES	TFIID	NA	NA	NA	NA	NA	G+E	40.52592	0	6.994266	2.968444	0.008544331	0.299243394	17	6.294	1.00E-06	3.166961527	2.430457223	0.492267544	NA	NA	NA	NA	NA	NA	NA	NA	NA	76.7	NA	-7	14	0.00546875	3	229	74	236	67	196	-305	NO	OPN	7244	0.55564	NA	0.000157192	0.000243756	0.000126204	0.000421733	3	NA	0	0
YLL064C	PAU18	chrXII	13083	13445	-	HT	1203	38	363	35970	17952	53922	2	YES	SAGA/TFIID	NA	NA	NA	NA	1	NA	NA	NA	NA	NA	NA	0.121836661	17	2.905	0.003207	NA	NA	NA	NA	NA	NA	NA	NA	NA	NA	NA	NA	309.9	NA	NA	7	0.005818786	3	111	59	NA	NA	291	-296	YES	UNCLEAR	13083	0.27362	NA	8.84E-05	0.000247665	0.000595629	0.000159052	1	NA	0	0
YHL049C	YHL049C	chrVIII	3726	4541	-	HT	1122	43	816	46452	21223	67675	0	NO	TFIID	NA	NA	NA	NA	NA	G+E	40.52592	0	6.994266	2.968444	0.008544331	0.816668531	17	6.268	3.00E-06	NA	NA	NA	NA	NA	NA	NA	NA	NA	NA	NA	NA	110.8	NA	-285	6	0.005347594	4	207	58	61	68	166	-133	NO	OPN	3726	0.41594	NA	0.000158076	0.00026427	0.000177738	1.81E-05	1	NA	0	0
YCL073C	GEX1	chrIII	6479	8326	-	HH	1380	16	1848	22908	11010	33918	2	YES	SAGA/TFIID	NA	NA	NA	NA	NA	NA	NA	NA	NA	NA	NA	8.127784167	6	NA	NA	1.886928346	0.063038998	0.133060528	NA	NA	NA	NA	NA	NA	NA	NA	NA	255.6	NA	NA	8	0.005797101	5	21	163	NA	NA	184	-54	NO	OPN	6479	0.66686	NA	0.000276219	0.000270777	0.000246337	0.000237698	2	NA	0	0
YBR302C	COS2	chrII	810340	811479	-	HT	0	40	1140	31218	11682	42900	2	YES	TFIID	NA	NA	NA	NA	NA	NA	NA	NA	NA	NA	NA	0.253432973	17	6.65	0	2.509933991	0.450716514	0.267478842	NA	NA	NA	NA	NA	NA	NA	NA	NA	177.8	NA	-7	0	NA	4	77	NA	NA	217	301	2	YES	DPN	1705	0.3809	NA	0.000173346	0.000294045	0.000145737	0.000801364	2	NA	0	0
YIR041W	PAU15	chrIX	433929	434303	+	HH	1818	23	375	21807	11620	33427	2	YES	TFIID	NA	NA	NA	NA	NA	NA	NA	NA	NA	NA	NA	0.337332321	15	NA	NA	NA	NA	NA	NA	NA	NA	NA	NA	NA	NA	23	NA	201.5	NA	-46	10	0.00550055	3	115	65	161	19	296	-299	YES	UNCLEAR	5585	0.36637	NA	0.000271961	0.000323684	0.0005485	0.000314193	3	NA	0	0
YEL075C	YEL075C	chrV	5345	5713	-	HT	1517	23	369	18717	13931	32648	0	NO	TFIID	NA	NA	NA	NA	NA	NA	NA	NA	NA	NA	NA	0.807110209	14	NA	NA	NA	NA	NA	NA	NA	NA	NA	NA	NA	NA	NA	NA	116.9	NA	NA	8	0.005273566	3	154	149	NA	NA	191	-410	NA	NA	5345	0.29807	NA	5.99E-05	0.000340899	0.000139341	9.66E-05	1	NA	0	0
YJL225C	YJL225C;HRF393/HRD1054;HRF393/HRD732;J0202	chrX	466	6130	-	HT	2646	42	5277	52215	24086	76301	0	NO	TFIID	NA	NA	NA	NA	NA	NA	NA	NA	NA	NA	NA	1.055163577	17	9.503	0	0.462728095	3.426353312	4.000278269	NA	NA	NA	NA	NA	NA	NA	NA	NA	214.8	NA	-415	16	0.006046863	3	206	59	7	192	210	-273	UNCLEAR	UNCLEAR	466	0.45148	NA	9.37E-05	0.000347594	0.000176558	5.69E-06	1	NA	0	0
YPR204W	YPR204W	chrXVI	944603	947701	+	HT	415	6	3099	4914	2835	7749	0	NO	TFIID	NA	NA	NA	NA	NA	NA	NA	NA	NA	NA	NA	1.006498529	17	27.012	0	NA	NA	NA	NA	NA	NA	NA	NA	NA	NA	NA	NA	182.3	NA	NA	0	0	0	NA	1960	NA	NA	NA	NA	NA	NA	365	0.3092	NA	8.97E-05	0.000352095	0.000152917	0.00012959	1	NA	0	0
YLL066C	YLL066C;L0519;L0532	chrXII	6120	9836	-	HT	3247	47	3618	48606	22458	71064	0	NO	TFIID	NA	NA	NA	NA	NA	NA	NA	NA	NA	NA	NA	0.833137211	17	14.293	0	NA	NA	NA	NA	NA	NA	NA	NA	NA	NA	NA	NA	164.4	NA	-916	15	0.004619649	3	37	301	7	485	338	-38	YES	DPN	6120	0.27255	NA	7.74E-05	0.000382082	0.000164431	4.96E-05	1	NA	0	0
YIL177C	YIL177C	chrIX	483	6147	-	HT	2646	38	5277	42675	21699	64374	0	NO	TFIID	NA	NA	NA	NA	NA	NA	NA	NA	NA	NA	NA	1.025201373	17	23.506	0	0.666801198	2.296560158	2.272702249	NA	NA	NA	NA	NA	NA	NA	NA	NA	78.2	NA	NA	11	0.004157218	2	206	59	NA	NA	161	-134	NO	OPN	483	0.2371	NA	0.000114424	0.000401147	0.000206345	0.000249965	1	NA	0	0
YIL176C	PAU14	chrIX	8793	9155	-	HH	2337	57	363	52092	25520	77612	2	YES	TFIID	NA	NA	NA	NA	NA	NA	NA	NA	NA	NA	NA	0.227523093	17	3.9	0.000421	NA	NA	NA	NA	NA	NA	NA	NA	NA	NA	NA	NA	206.6	NA	NA	13	0.005562687	3	110	62	NA	NA	272	-318	YES	UNCLEAR	8793	0.33054	NA	0.003069057	0.000418187	0.00023018	4.09E-05	1	NA	0	0
YFL068W	YFL068W	chrVI	53	535	+	HT	0	85	483	92373	37325	129698	NA	NA	TFIID	NA	NA	NA	NA	NA	G+E	40.52592	0	6.994266	2.968444	0.008544331	0.82942467	6	NA	NA	NA	NA	NA	NA	NA	NA	NA	NA	NA	NA	NA	NA	163.2	NA	NA	0	NA	0	NA	NA	NA	NA	NA	NA	NA	NA	53	0.44062	NA	5.65E-05	0.000442729	0.000149677	8.65E-05	1	NA	0	0
YNL339C	YRF1-6	chrXIV	371	6098	-	HH	2232	76	5580	74865	34852	109717	0	NO	TFIID	NA	NA	NA	NA	NA	G+E	40.52592	0	6.994266	2.968444	0.008544331	0.869445556	17	20.456	0	-0.02004208	2.481350458	-78.59614931	NA	NA	NA	Lethal	NA	0.9973	NA	NA	NA	114.6	Y	-69	11	0.004928315	3	126	19	50	317	367	-94	YES	DPN	371	0.29365	0.057471264	0.000113502	0.00044577	0.000253015	0.000164237	2	NA	0	0
YNR076W	PAU6	chrXIV	781918	782280	+	HH	315	63	363	73593	32001	105594	2	YES	SAGA/TFIID	NA	NA	NA	NA	NA	G+E	40.52592	0	6.994266	2.968444	0.008544331	0.045828778	16	NA	NA	NA	NA	NA	NA	NA	NA	NA	NA	NA	NA	NA	NA	190.8	NA	NA	2	0.006349206	4	111	59	NA	NA	168	-426	NA	NA	2053	0.36198	NA	7.07E-05	0.000463308	0.001609023	5.07E-05	1	NA	0	0
YOR396W	YRF1-8	chrXV	1085473	1090863	+	HH	1104	5	5391	9444	4145	13589	NA	NA	NA	NA	NA	NA	NA	NA	NA	NA	NA	NA	NA	NA	0.844264698	17	15.022	0	NA	NA	NA	NA	NA	NA	NA	NA	NA	NA	NA	NA	NA	NA	-410	4	0.003623188	3	204	61	5	614	202	-136	NO	OPN	428	NA	NA	0.000140473	0.00049206	0.000273228	0.000115579	NA	NA	0	0
YGR296W	YRF1-3	chrVII	1084864	1090591	+	HH	2135	70	5580	71895	30401	102296	0	NO	TFIID	NA	NA	NA	NA	NA	G+E	40.52592	0	6.994266	2.968444	0.008544331	0.554066395	17	8.608	0	NA	NA	NA	NA	NA	NA	NA	NA	NA	NA	NA	NA	94.4	NA	-69	11	0.005152225	3	83	24	45	312	357	-99	YES	DPN	349	0.3887	NA	0.000117556	0.000493014	0.000252564	2.59E-05	2	NA	0	0
YLR467W	YRF1-5	chrXII	1072508	1077898	+	HH	798	64	5391	59718	27560	87278	0	NO	TFIID	NA	NA	NA	NA	NA	NA	NA	NA	NA	NA	NA	1.375553156	17	14.684	0	-0.098470856	1.124028797	-10.76666021	NA	NA	NA	NA	NA	NA	NA	NA	NA	91.3	NA	-404	4	0.005012531	3	204	61	43	319	166	-136	NO	OPN	279	0.26911	NA	0.00014495	0.000507742	0.000282178	5.04E-05	1	NA	0	0
YDR542W	PAU10	chrIV	1523249	1523611	+	HH	2551	57	363	61290	27624	88914	2	YES	SAGA/TFIID	NA	NA	NA	NA	NA	NA	NA	NA	NA	NA	NA	0.317921442	17	3.682	0.000762	NA	NA	NA	NA	NA	NA	NA	NA	NA	NA	132	NA	103.3	NA	NA	16	0.00627205	4	96	33	NA	NA	257	-257	YES	UNCLEAR	8322	0.32352	NA	6.90E-05	0.000507941	0.000156288	8.40E-05	1	NA	0	0
YDR545W	YRF1-1	chrIV	1526321	1531711	+	HT	2710	44	5391	41217	22170	63387	0	NO	TFIID	NA	NA	NA	NA	NA	NA	NA	NA	NA	NA	NA	0.862477259	17	15.4	0	-0.673273267	0.689427164	-1.233254829	NA	NA	NA	NA	NA	NA	NA	NA	NA	70.1	NA	-406	15	0.005535055	3	192	73	167	11	178	-314	NO	OPN	222	0.26634	NA	0.000140002	0.000539259	0.000278449	8.05E-05	1	NA	0	0
YAL064W	YAL064W	chrI	21566	21850	+	HH	7823	31	285	30663	14984	45647	0	NO	NA	NA	NA	NA	NA	NA	NA	NA	NA	NA	NA	NA	0.538465087	14	NA	NA	2.698086366	0.6488233	0.298543329	NA	NA	NA	NA	NA	NA	NA	NA	NA	134.9	NA	NA	45	0.005752269	3	5	218	NA	NA	223	-70	UNCLEAR	UNCLEAR	21566	0.29116	NA	0.000325928	0.000544753	0.00019641	9.86E-05	2	NA	0	0
YHR219W	YHR219W	chrVIII	560173	562047	+	HT	249	76	1875	70590	30715	101305	0	NO	TFIID	NA	NA	NA	NA	NA	G+E	40.52592	0	6.994266	2.968444	0.008544331	0.843215865	17	14.925	0	1.189417107	0.251764567	0.421854925	NA	NA	NA	NA	NA	NA	NA	NA	NA	158.6	NA	NA	2	0.008032129	4	108	27	NA	NA	167	-234	NO	OPN	596	0.27189	NA	0.000101545	0.000547638	0.00052622	2.26E-05	1	NA	0	0
YEL021W	URA3	chrV	116167	116970	+	HT	367	59	804	68316	27867	96183	0	NO	TFIID	NA	NA	NA	NA	0.000448706	G+E	40.52592	0	6.994266	2.968444	0.008544331	0.134532398	16	NA	NA	7.383115323	0.01595939	0.017110728	NA	NA	NA	NA	NA	NA	NA	NA	NA	149.8	NA	NA	1	0.002724796	2	155	334	NA	NA	167	-409	NA	NA	116167	0.5309	NA	0.000619716	0.000559984	0.000302045	1.08E-05	3	NA	0	0
YER190C-B	YER190C-B	chrV	575680	576162	-	HT	0	0	483	0	0	0	NA	NA	NA	NA	NA	NA	NA	NA	NA	NA	NA	NA	NA	NA	NA	NA	NA	NA	NA	NA	NA	NA	NA	NA	NA	NA	NA	NA	NA	NA	132.8	NA	NA	0	NA	3	NA	NA	NA	NA	207	-107	UNCLEAR	UNCLEAR	712	NA	NA	0.000167329	0.000686702	0.000307717	NA	NA	NA	0	0
YLL066W-B	YLL066W-B	chrXII	5605	5775	+	HH	1304	7	171	9735	4444	14179	NA	NA	NA	NA	NA	NA	NA	NA	NA	NA	NA	NA	NA	NA	NA	NA	NA	NA	NA	NA	NA	NA	NA	NA	NA	NA	NA	NA	NA	NA	274.4	NA	NA	6	0.004601227	3	130	32	NA	NA	363	-107	YES	DPN	5605	NA	NA	6.68E-05	0.000738671	0.000337018	NA	NA	NA	0	0
YJL223C	PAU1	chrX	8776	9138	-	HH	2337	60	363	64056	25439	89495	2	YES	SAGA/TFIID	NA	NA	NA	NA	NA	NA	NA	NA	NA	NA	NA	0.087023732	15	NA	NA	NA	NA	NA	NA	NA	NA	NA	NA	NA	NA	NA	NA	259.9	NA	NA	14	0.005990586	4	111	58	NA	NA	167	-425	NA	NA	8776	0.28166	NA	0.001129154	0.00097098	0.000164753	3.07E-05	1	NA	0	0
YOL161C	PAU20	chrXV	11549	11911	-	HT	3322	49	363	48051	17794	65845	2	YES	SAGA/TFIID	NA	NA	NA	NA	NA	NA	NA	NA	NA	NA	NA	0.533509931	17	3.459	0.000887	2.131499544	0.612698679	0.367230064	NA	NA	NA	NA	NA	NA	NA	NA	NA	250.8	NA	NA	19	0.005719446	3	112	72	NA	NA	299	-293	YES	UNCLEAR	11549	0.2822	NA	0.000872563	0.00201853	0.001398053	1.86E-05	1	NA	0	0
YJR158W	HXT16	chrX	732440	734143	+	HH	2844	63	1704	67443	30650	98093	0	NO	SAGA/TFIID	NA	NA	NA	NA	NA	NA	NA	NA	NA	NA	NA	0.340718953	13	NA	NA	1.793518338	0.102593859	0.178589064	NA	NA	NA	NA	NA	NA	NA	NA	NA	186.5	NA	NA	17	0.005977496	5	45	105	NA	NA	172	-487	NA	NA	11608	0.67137	NA	0.000538612	0.00580211	0.001488062	6.92E-06	3	NA	0	0
YFL058W	THI5	chrVI	12929	13951	+	HT	670	26	1023	24243	11679	35922	2	YES	TFIID	NA	NA	NA	NA	NA	G+E	40.52592	0	6.994266	2.968444	0.008544331	1.250452637	15	NA	NA	1.748840372	1.356990635	0.666098192	NA	NA	NA	NA	NA	NA	NA	NA	NA	132.8	NA	NA	4	0.005970149	3	100	43	NA	NA	276	-304	YES	UNCLEAR	12929	1.002	NA	2.65E-05	0.469161488	6.65E-05	0.000366877	3	NA	0	0
YAL068C	PAU8	chrI	1807	2169	-	HH	311	53	363	50388	18380	68768	2	YES	NA	NA	NA	NA	NA	NA	G+E	40.52592	0	6.994266	2.968444	0.008544331	0.239486367	17	2.539	0.010383	NA	NA	NA	NA	NA	NA	Lethal	NA	1.00298	0.97383	NA	NA	147	Y	NA	2	0.006430868	3	111	73	NA	NA	258	-331	YES	UNCLEAR	1807	0.25532	0.051724138	NA	NA	NA	5.88E-05	1	NA	0	0
YAR066W	YAR066W	chrI	222727	223338	+	HT	552	32	612	32115	16608	48723	2	YES	SAGA	NA	NA	NA	NA	NA	NA	NA	NA	NA	NA	NA	2.816591891	15	NA	NA	1.797363487	1.619126039	0.707952979	NA	NA	NA	NA	NA	NA	NA	NA	NA	169.5	NA	-1754	3	0.005434783	4	0	0	64	152	214	-340	UNCLEAR	UNCLEAR	6880	0.93649	NA	NA	NA	NA	0.000177107	2	NA	0	0
YBL112C	YBL112C	chrII	2582	2899	-	HT	8	40	318	41259	14602	55861	0	NO	TFIID	NA	NA	NA	NA	NA	G+E	40.52592	0	6.994266	2.968444	0.008544331	1.154813164	17	8.035	0	NA	NA	NA	NA	NA	NA	NA	NA	NA	NA	NA	NA	NA	NA	NA	0	0	5	65	57	NA	NA	164	-447	NA	NA	2582	0.3525	NA	NA	NA	NA	2.63E-06	1	NA	0	0
YBL111C	YBL111C	chrII	2907	5009	-	HT	2596	45	2004	51261	23098	74359	0	NO	TFIID	NA	NA	NA	NA	NA	G+E	40.52592	0	6.994266	2.968444	0.008544331	1.308624866	17	9.353	0	NA	NA	NA	NA	NA	NA	NA	NA	NA	NA	NA	NA	78.8	NA	NA	13	0.005007704	2	206	59	NA	NA	166	-134	NO	OPN	2907	0.37214	NA	NA	NA	NA	4.80E-05	1	NA	0	0
YBL108C-A	PAU9	chrII	7605	7733	-	HT	2228	12	129	10845	4845	15690	NA	NA	NA	NA	NA	NA	NA	NA	NA	NA	NA	NA	NA	NA	0.185286086	17	1.505	0.218638	NA	NA	NA	NA	NA	NA	NA	NA	NA	NA	NA	NA	182.6	NA	NA	13	0.005834829	5	12	123	NA	NA	171	-198	NO	OPN	7605	NA	NA	NA	NA	NA	9.48E-06	NA	NA	0	0
YBR072C-A	YBR072C-A	chrII	382860	383021	-	HH	91	0	162	0	0	0	NA	NA	NA	NA	NA	NA	NA	NA	NA	NA	NA	NA	NA	NA	NA	NA	NA	NA	NA	NA	NA	NA	NA	NA	Lethal	NA	NA	NA	NA	NA	311.1	N	NA	0	0	4	4	150	NA	NA	190	-387	NO	OPN	382860	NA	NA	NA	NA	NA	NA	NA	NA	0	0
YBR200W-A	YBR200W-A	chrII	622983	623147	+	HT	456	0	165	0	0	0	NA	NA	NA	NA	NA	NA	NA	NA	NA	NA	NA	NA	NA	NA	NA	NA	NA	NA	NA	NA	NA	NA	NA	NA	Lethal	NA	NA	NA	NA	NA	136.4	N	NA	2	0.004385965	4	69	89	NA	NA	242	-164	YES	UNCLEAR	190037	NA	NA	NA	NA	NA	NA	NA	NA	0	0
YCL067C	HMLALPHA2	chrIII	12386	13018	-	HH	264	39	633	49215	18798	68013	1	YES	SAGA	NA	NA	NA	NA	NA	NA	NA	NA	NA	NA	NA	0.440049888	17	4.06	0.000189	NA	NA	NA	NA	NA	NA	NA	NA	NA	NA	NA	NA	108.3	NA	131	1	0.003787879	4	22	239	28	109	261	-53	YES	DPN	12386	0.2845	NA	NA	NA	NA	0.000559107	2	NA	0	0
YCL066W	HMLALPHA1	chrIII	13282	13809	+	HH	264	63	528	68844	33994	102838	1	YES	TFIID	NA	NA	NA	NA	NA	NA	NA	NA	NA	NA	NA	1.428925946	15	NA	NA	NA	NA	NA	NA	NA	NA	NA	NA	NA	NA	NA	NA	229.9	NA	NA	1	0.003787879	4	149	25	NA	NA	261	-100	YES	DPN	13282	0.20228	NA	NA	NA	NA	0.000855509	2	NA	0	0
YCR040W	MATALPHA1;ALPHA-1;MAT1A;MATAL1	chrIII	200442	200969	+	HH	264	64	528	72297	41552	113849	0	NO	TFIID	NA	NA	NA	NA	1	NA	NA	NA	NA	NA	NA	1.679732444	17	18.816	0	NA	NA	NA	NA	NA	NA	NA	NA	NA	NA	NA	NA	NA	NA	NA	1	0.003787879	3	125	35	NA	NA	255	-110	YES	DPN	115651	0.30894	NA	NA	NA	NA	0.003679684	1	NA	0	0
YCR108C	YCR108C	chrIII	315997	316188	-	HT	0	5	192	5658	3601	9259	NA	NA	NA	NA	NA	NA	NA	NA	NA	NA	NA	NA	NA	NA	NA	NA	NA	NA	NA	NA	NA	NA	NA	NA	NA	NA	NA	NA	NA	NA	399.8	NA	NA	0	NA	4	95	NA	NA	NA	147	-89	NO	OPN	432	NA	NA	NA	NA	NA	NA	NA	NA	0	0
YDL007C-A	YDL007C-A	chrIV	436567	436824	-	HH	1223	0	258	0	0	0	NA	NA	NA	NA	NA	NA	NA	NA	NA	NA	NA	NA	NA	NA	NA	NA	NA	NA	NA	NA	NA	NA	NA	NA	NA	NA	NA	NA	NA	NA	106	NA	NA	7	0.00572363	4	82	49	NA	NA	251	-124	YES	DPN	436567	NA	NA	NA	NA	NA	NA	NA	NA	0	0
YEL076C	YEL076C	chrV	4464	5114	-	HT	231	21	651	24354	11955	36309	0	NO	TFIID	NA	NA	NA	NA	NA	G+E	40.52592	0	6.994266	2.968444	0.008544331	0.124045538	17	1.806	0.067719	NA	NA	NA	NA	NA	NA	NA	NA	NA	NA	NA	NA	NA	NA	NA	1	0.004329004	3	149	12	NA	NA	261	-87	YES	DPN	4464	0.40841	NA	NA	NA	NA	3.44E-05	1	NA	0	0
YER189W	YER189W	chrV	571155	571523	+	HH	1248	36	369	43008	16614	59622	0	NO	TFIID	NA	NA	NA	NA	NA	G+E	40.52592	0	6.994266	2.968444	0.008544331	1.218149076	16	NA	NA	NA	NA	NA	NA	NA	NA	NA	NA	NA	NA	NA	NA	136.2	NA	-391	6	0.004807692	3	201	84	146	168	314	-320	YES	UNCLEAR	5351	0.39591	NA	NA	NA	NA	1.21E-05	1	NA	0	0
YFL064C	YFL064C	chrVI	3322	3846	-	HH	2580	38	525	36213	14986	51199	0	NO	TFIID	NA	NA	NA	NA	NA	G+E	40.52592	0	6.994266	2.968444	0.008544331	1.228893617	15	NA	NA	NA	NA	NA	NA	NA	NA	NA	NA	NA	NA	NA	NA	NA	NA	NA	14	0.005426357	4	67	59	NA	NA	171	-295	NO	OPN	3322	0.34909	NA	NA	NA	NA	0.000325156	1	NA	0	0
YGL260W	YGL260W;NRB76	chrVII	6860	7090	+	HH	208	17	231	21537	10412	31949	NA	NA	TFIID	NA	NA	NA	NA	NA	NA	NA	NA	NA	NA	NA	0.03645	2	NA	NA	NA	NA	NA	NA	NA	NA	Lethal	NA	1.0141	1.01524	NA	NA	136	Y	NA	1	0.004807692	4	14	167	NA	NA	181	-61	NO	OPN	6860	0.26107	0.00862069	NA	NA	NA	3.92E-05	1	NA	0	0
YHL048C-A	YHL048C-A	chrVIII	5663	5797	-	HH	604	7	135	5730	2357	8087	NA	NA	NA	NA	NA	NA	NA	NA	NA	NA	NA	NA	NA	NA	NA	NA	NA	NA	NA	NA	NA	NA	NA	NA	NA	NA	NA	NA	1	NA	118.3	NA	NA	3	0.004966887	4	69	97	NA	NA	166	-6	NO	OPN	5663	NA	NA	NA	NA	NA	NA	NA	NA	0	0
YHR214C-E	YHR214C-E	chrVIII	551200	551499	-	HH	600	2	300	2115	994	3109	NA	NA	NA	NA	NA	NA	NA	NA	NA	NA	NA	NA	NA	NA	NA	NA	NA	NA	NA	NA	NA	NA	NA	NA	NA	NA	NA	NA	NA	NA	314	NA	-97	3	0.005	4	67	104	164	7	232	-179	YES	UNCLEAR	11144	NA	NA	NA	NA	NA	NA	NA	NA	0	0
YHR218W	YHR218W	chrVIII	558014	559924	+	HT	2047	25	1812	27009	9367	36376	0	NO	TFIID	NA	NA	NA	NA	NA	NA	NA	NA	NA	NA	NA	1.002851247	17	0.953	0.539882	NA	NA	NA	NA	NA	NA	NA	NA	NA	NA	NA	NA	184.2	NA	NA	9	0.004396678	4	14	98	NA	NA	210	-173	UNCLEAR	UNCLEAR	2719	0.38429	NA	NA	NA	NA	8.13E-05	1	NA	0	0
YJL052C-A	YJL052C-A	chrX	337884	338003	-	HH	268	6	120	6618	2224	8842	NA	NA	NA	NA	NA	NA	NA	NA	NA	NA	NA	NA	NA	NA	4.657866667	7	NA	NA	NA	NA	NA	NA	NA	NA	NA	NA	NA	NA	NA	NA	254.5	NA	NA	1	0.003731343	2	433	231	NA	NA	139	-306	NO	OPN	337884	NA	NA	NA	NA	NA	0.000143317	NA	NA	0	0
YJR151W-A	YJR151W-A	chrX	717580	717630	+	HH	1840	3	51	4098	1373	5471	NA	NA	NA	NA	NA	NA	NA	NA	NA	NA	NA	NA	NA	NA	NA	NA	NA	NA	NA	NA	NA	NA	NA	NA	Lethal	NA	NA	NA	NA	NA	279.2	N	NA	12	0.006521739	4	114	51	NA	NA	173	-126	NO	OPN	28121	NA	NA	NA	NA	NA	NA	NA	NA	0	0
YJR159W	SOR1;SDH1	chrX	736044	737117	+	HT	1901	82	1074	67860	33624	101484	2	YES	SAGA/TFIID	NA	NA	NA	NA	1	NA	NA	NA	NA	NA	NA	0.578920233	12	NA	NA	2.312413415	0.113541084	0.145717274	NA	NA	NA	NA	NA	NA	NA	NA	NA	282	NA	NA	10	0.005260389	3	2	137	NA	NA	192	-212	NO	OPN	8634	0.34965	NA	NA	NA	NA	0.000361479	1	NA	0	0
YLR013W	GAT3	chrXII	171339	171764	+	HH	1058	20	426	24504	8361	32865	0	NO	NA	NA	NA	NA	-0.035714286	0.954951873	NA	NA	NA	NA	NA	NA	1.234974651	7	NA	NA	2.651217747	0.066956629	0.097600354	NA	NA	NA	Lethal	NA	1.00237	NA	24	NA	291	Y	NA	6	0.005671078	4	137	20	NA	NA	214	-95	UNCLEAR	UNCLEAR	171339	0.44523	0.048850575	NA	NA	NA	9.79E-05	2	NA	0	0
YLR154W-C	TAR1;ART1	chrXII	454696	455070	+	HH	6382	4	375	5940	4213	10153	NA	NA	NA	NA	NA	NA	NA	NA	NA	NA	NA	NA	NA	NA	NA	NA	NA	NA	NA	NA	NA	NA	NA	NA	NA	NA	NA	NA	NA	NA	230.8	NA	NA	17	0.002663742	0	14315	3442	NA	NA	NA	NA	NA	NA	454696	NA	NA	NA	NA	NA	NA	NA	NA	0	0
YLR154C-G	YLR154C-G;smORF421	chrXII	462522	462671	-	HT	6156	5	150	2067	558	2625	NA	NA	NA	NA	NA	NA	NA	NA	NA	NA	NA	NA	NA	NA	NA	NA	NA	NA	NA	NA	NA	NA	NA	NA	NA	NA	NA	NA	NA	NA	137.2	NA	NA	0	0	0	11417	6340	NA	NA	NA	NA	NA	NA	462522	NA	NA	NA	NA	NA	NA	NA	NA	0	0
YLR154C-H	YLR154C-H;smORF494;SR15	chrXII	468827	468958	-	HT	359	4	132	6072	2565	8637	NA	NA	NA	NA	NA	NA	NA	NA	NA	NA	NA	NA	NA	NA	NA	NA	NA	NA	NA	NA	NA	NA	NA	NA	NA	NA	NA	NA	NA	NA	194	NA	NA	3	0.008356546	4	17704	53	NA	NA	165	-128	NO	OPN	468827	NA	NA	NA	NA	NA	NA	NA	NA	0	0
YLR155C	ASP3-1	chrXII	469317	470405	-	HH	1708	57	1089	53130	22611	75741	0	NA	TFIID	NA	NA	NA	NA	NA	NA	NA	NA	NA	NA	NA	3.004876656	10	NA	NA	NA	NA	NA	NA	NA	NA	NA	NA	NA	NA	NA	NA	251.2	NA	NA	10	0.005854801	4	83	226	NA	NA	309	8	YES	DPN	469317	0.53363	NA	NA	NA	NA	0.000113537	3	NA	0	0
YLR156W	YLR156W;L9632.3	chrXII	472113	472457	+	HH	1708	55	345	64716	19146	83862	0	NA	TFIID	NA	NA	NA	NA	NA	NA	NA	NA	NA	NA	NA	1.627883929	8	NA	NA	NA	NA	NA	NA	NA	NA	NA	NA	NA	NA	NA	NA	306.9	NA	NA	10	0.005854801	4	7	140	NA	NA	184	-215	NO	OPN	472113	0.89797	NA	NA	NA	NA	9.41E-05	3	NA	0	0
YLR161W	YLR161W;L9632.5	chrXII	488997	489341	+	HH	1708	57	345	76359	36332	112691	0	NA	TFIID	NA	NA	NA	NA	NA	NA	NA	NA	NA	NA	NA	NA	1	NA	NA	NA	NA	NA	NA	NA	NA	NA	NA	NA	NA	NA	NA	249.6	NA	NA	10	0.005854801	4	7	173	NA	NA	180	-68	NO	OPN	488997	0.63715	NA	NA	NA	NA	4.54E-05	3	NA	0	0
YLR462W	YLR462W	chrXII	1065956	1066564	+	HT	2675	51	609	56412	20828	77240	0	NO	TFIID	NA	NA	NA	NA	NA	G+E	40.52592	0	6.994266	2.968444	0.008544331	1.236401082	17	8.13	0	NA	NA	NA	NA	NA	NA	NA	NA	NA	NA	NA	NA	102	NA	-385	15	0.005607477	4	72	108	143	59	202	-317	NO	OPN	11613	0.44729	NA	NA	NA	NA	3.86E-05	1	NA	0	0
YMR325W	PAU19	chrXIII	922641	923015	+	HT	1240	37	375	36273	20338	56611	2	YES	TFIID	NA	NA	NA	NA	NA	NA	NA	NA	NA	NA	NA	0.31815952	17	10.128	0	NA	NA	NA	NA	NA	NA	NA	NA	NA	NA	NA	NA	226	NA	NA	6	0.00483871	4	117	64	NA	NA	171	-255	NO	OPN	1416	0.25474	NA	NA	NA	NA	2.52E-05	2	NA	0	0
YNR077C	YNR077C;N3830	chrXIV	783287	783541	-	HT	0	23	255	22500	7677	30177	0	NA	NA	NA	NA	NA	NA	NA	NA	NA	NA	NA	NA	NA	0.671357157	14	NA	NA	NA	NA	NA	NA	NA	NA	NA	NA	NA	NA	NA	NA	NA	NA	NA	0	NA	3	NA	NA	NA	NA	241	20	YES	DPN	792	0.35126	NA	NA	NA	NA	1.67E-05	1	NA	0	0
YOL166W-A	YOL166W-A	chrXV	585	740	+	HT	0	4	156	6540	3448	9988	NA	NA	NA	NA	NA	NA	NA	NA	NA	NA	NA	NA	NA	NA	NA	NA	NA	NA	NA	NA	NA	NA	NA	NA	NA	NA	NA	NA	NA	NA	187.6	NA	NA	0	NA	3	NA	NA	NA	NA	194	-385	NO	OPN	585	NA	NA	NA	NA	NA	NA	NA	NA	0	0
YOL019W-A	YOL019W-A	chrXV	288420	288572	+	HT	470	5	153	4182	1552	5734	NA	NA	NA	NA	NA	NA	NA	0.195995141	NA	NA	NA	NA	NA	NA	NA	NA	NA	NA	NA	NA	NA	NA	NA	NA	Lethal	NA	NA	NA	NA	NA	158.7	N	-240	3	0.006382979	3	265	73	167	4	171	-148	NO	OPN	288420	NA	NA	NA	NA	NA	NA	NA	NA	0	0
YOR072W-B	YOR072W-B	chrXV	464469	464630	+	HH	3193	4	162	5283	3221	8504	NA	NA	NA	NA	NA	NA	NA	NA	NA	NA	NA	NA	NA	NA	NA	NA	NA	NA	4.591433805	0.143136574	0.082399956	NA	NA	NA	NA	NA	NA	NA	NA	NA	228.8	NA	-32	12	0.003758221	3	110	149	142	117	230	-431	NA	NA	464469	NA	NA	NA	NA	NA	NA	NA	NA	0	0
YPR108W-A	YPR108W-A	chrXVI	744175	744387	+	HT	432	3	213	3252	1269	4521	NA	NA	NA	NA	NA	NA	NA	NA	NA	NA	NA	NA	NA	NA	NA	NA	NA	NA	3.63930307	0.234324711	0.133011999	NA	NA	NA	Lethal	NA	NA	NA	NA	NA	199.5	N	98	3	0.006944444	5	93	47	224	5	204	-122	NO	OPN	203679	NA	NA	NA	NA	NA	NA	NA	NA	0	0
YCL068C	YCL068C;YCL68C	chrIII	11503	12285	-	HT	101	13	783	14925	7109	22034	0	NO	TFIID	NA	NA	NA	NA	NA	NA	NA	NA	NA	NA	NA	0.294966818	11	NA	NA	NA	NA	NA	NA	NA	NA	NA	NA	NA	NA	NA	NA	226.8	NA	NA	1	0.00990099	5	158	28	NA	NA	203	-225	NO	OPN	11503	0.30254	NA	5.51E-05	3.64E-05	3.76E-05	2.22E-05	3	NA	0.000639386	0.5
YAR068W	YAR068W	chrI	224084	224569	+	HT	746	69	486	64164	24976	89140	0	NO	TFIID	NA	NA	NA	NA	NA	NA	NA	NA	NA	NA	NA	2.272887887	17	5.561	4.00E-06	2.566530827	2.320278671	0.593503916	NA	NA	NA	NA	NA	NA	NA	NA	NA	85.5	NA	NA	3	0.004021448	4	3	157	NA	NA	271	-232	YES	UNCLEAR	5649	0.53579	NA	0.000108245	3.85E-05	0.000172784	0.000110347	1	NA	0.001030928	0.5
YFR057W	YFR057W	chrVI	269061	269516	+	HT	3835	25	456	25947	12836	38783	3	NA	NA	NA	NA	NA	NA	NA	NA	NA	NA	NA	NA	NA	0.4802	2	NA	NA	3.355898481	1.341073801	0.345078201	NA	NA	NA	Lethal	NA	1.04773	0.97602	NA	NA	116.5	N	NA	22	0.005736636	3	113	121	NA	NA	215	-196	UNCLEAR	UNCLEAR	645	0.71198	0.025862069	0.00027307	9.63E-05	8.98E-05	1.76E-05	1	NA	0.001098901	0.5
YOR391C	HSP33	chrXV	1078545	1079258	-	HH	1018	39	714	40443	20382	60825	0	NO	NA	NA	NA	NA	NA	NA	G+E	40.52592	0	6.994266	2.968444	0.008544331	0.074654215	13	NA	NA	2.205056743	1.308721278	0.518804593	NA	NA	NA	NA	NA	NA	NA	NA	NA	160.3	NA	NA	5	0.004911591	4	25	123	NA	NA	265	-364	YES	UNCLEAR	12033	1.4408	NA	0.000372643	0.000101718	0.000246527	7.50E-05	3	NA	0.000701262	0.5
YHL046C	PAU13	chrVIII	11923	12285	-	HH	1280	33	363	30267	16085	46352	2	YES	SAGA/TFIID	NA	NA	NA	NA	NA	NA	NA	NA	NA	NA	NA	1.593256105	17	13.717	0	NA	NA	NA	NA	NA	NA	Lethal	NA	1.02337	0.98435	NA	1	116.7	Y	NA	7	0.00546875	4	113	69	NA	NA	160	-144	NO	OPN	11923	0.23786	0.028735632	8.32E-05	0.000104714	0.000226002	1.32E-05	1	NA	0.001381215	0.5
YOL165C	AAD15	chrXV	1647	2078	-	HH	2052	40	432	45615	16161	61776	0	NO	TFIID	NA	NA	NA	NA	NA	NA	NA	NA	NA	NA	NA	5.290546823	16	NA	NA	3.159625801	1.255131233	0.354575657	NA	NA	NA	NA	NA	NA	NA	NA	NA	194.8	NA	NA	12	0.005847953	4	14	109	NA	NA	160	-333	NO	OPN	1647	0.80725	NA	6.35E-05	0.000126464	0.00032363	0.000287838	3	NA	0.001160093	0.5
YMR323W	ERR3	chrXIII	920088	921401	+	HH	1009	58	1314	74391	30550	104941	2	YES	SAGA	NA	NA	NA	NA	NA	NA	NA	NA	NA	NA	NA	NA	NA	NA	NA	1.761340026	0.321713161	0.322026202	NA	NA	NA	NA	NA	NA	NA	NA	NA	195.4	NA	NA	5	0.004955401	4	30	107	NA	NA	175	-182	NO	OPN	3030	0.74746	NA	0.000360551	0.000181219	0.000679964	4.14E-05	2	NA	0.000380807	0.5
YER188C-A	YER188C-A	chrV	569608	569907	-	HH	1248	13	300	11460	8477	19937	NA	NA	NA	NA	NA	NA	NA	NA	NA	NA	NA	NA	NA	NA	NA	NA	NA	NA	NA	NA	NA	NA	NA	NA	NA	NA	NA	NA	NA	NA	96	NA	-220	6	0.004807692	3	166	95	125	11	316	-306	YES	UNCLEAR	6967	NA	NA	0.000119906	0.000198758	8.77E-05	NA	NA	NA	0.001672241	0.5
YMR322C	SNO4	chrXIII	918366	919079	-	HH	1009	45	714	48060	24290	72350	0	NO	NA	NA	NA	NA	NA	NA	NA	NA	NA	NA	NA	NA	0.570141263	7	NA	NA	1.950664472	0.750878105	0.444224131	NA	NA	NA	Lethal	NA	1.02382	1.0545	188	NA	167.7	Y	NA	5	0.004955401	4	25	123	NA	NA	254	-375	YES	UNCLEAR	5352	1.277	0.057471264	0.000390052	0.000201562	0.000400347	5.75E-05	2	NA	0.000701262	0.5
YBR301W	PAU24;DAN3	chrII	809057	809419	+	HT	1952	35	363	37578	11059	48637	2	YES	SAGA/TFIID	NA	NA	NA	NA	NA	G+E	40.52592	0	6.994266	2.968444	0.008544331	0.136394424	17	1.434	0.172676	NA	NA	NA	NA	NA	NA	Lethal	NA	1.01332	0.99484	NA	NA	214.4	Y	NA	13	0.006659836	5	146	56	NA	NA	148	-248	NO	OPN	3765	0.35221	0.086206897	0.000535203	0.000333317	0.000227618	7.68E-05	1	NA	0.001381215	0.5
YLL067C	YLL067C;L0111;L0503;L0509	chrXII	585	4301	-	HH	1304	51	3618	70029	28427	98456	0	NO	TFIID	NA	NA	NA	NA	NA	NA	NA	NA	NA	NA	NA	0.960188971	17	23.268	0	NA	NA	NA	NA	NA	NA	NA	NA	NA	NA	NA	NA	424.6	NA	-924	6	0.004601227	4	37	123	15	348	297	-198	YES	UNCLEAR	585	0.54695	NA	6.72E-05	0.000342471	0.000145517	0.00019893	1	NA	0.000134553	0.5
YFL066C	YFL066C	chrVI	1437	2615	-	HT	415	25	1179	26439	9205	35644	0	NO	TFIID	NA	NA	NA	NA	NA	G+E	40.52592	0	6.994266	2.968444	0.008544331	2.848889692	17	14.26	0	NA	NA	NA	NA	NA	NA	NA	NA	NA	NA	NA	NA	140.7	NA	NA	1	0.002409639	2	162	281	NA	NA	174	-356	NO	OPN	1437	0.60563	NA	6.66E-05	0.000413405	0.000232193	3.01E-05	1	NA	0.000424448	0.5
YKL224C	PAU16	chrXI	1810	2181	-	HT	1322	27	372	24429	11489	35918	2	YES	TFIID	NA	NA	NA	NA	NA	G+E	40.52592	0	6.994266	2.968444	0.008544331	0.20630708	17	3.274	0.001405	NA	NA	NA	NA	NA	NA	NA	NA	NA	NA	NA	NA	213.1	NA	NA	9	0.006807867	4	100	74	NA	NA	165	-296	NO	OPN	1810	0.5329	NA	0.000172272	0.000499168	0.000527614	7.43E-05	2	NA	0.001347709	0.5
YGL261C	PAU11	chrVII	6290	6652	-	HH	208	35	363	34641	23173	57814	2	YES	SAGA/TFIID	NA	NA	NA	NA	NA	G+E	40.52592	0	6.994266	2.968444	0.008544331	0.329362536	17	2.407	0.01526	2.474350949	0.515506825	0.290172273	NA	NA	NA	Lethal	NA	1.00098	1.01011	25	NA	97.7	Y	NA	1	0.004807692	3	110	41	NA	NA	295	-297	YES	UNCLEAR	6290	0.32688	0.017241379	0.000112462	0.000510867	0.001207561	5.68E-06	1	NA	0.001381215	0.5
YLR012C	YLR012C	chrXII	169982	170281	-	HH	1058	27	300	25437	12003	37440	0	NO	NA	NA	NA	NA	-1	0.526826039	NA	NA	NA	NA	NA	NA	1.06073141	13	NA	NA	2.911306741	0.228765954	0.164288714	NA	NA	NA	Lethal	NA	1.01566	0.99629	NA	NA	333	N	NA	6	0.005671078	4	84	101	NA	NA	212	-176	UNCLEAR	UNCLEAR	169982	1.4319	0.077586207	0.002417537	0.000858319	0.007041921	4.59E-05	3	NA	0.001672241	0.5
YLR162W	YLR162W	chrXII	489573	489929	+	HT	232	32	357	33108	13223	46331	0	NO	SAGA	NA	NA	NA	NA	NA	NA	NA	NA	NA	NA	NA	0.510948648	15	NA	NA	NA	NA	NA	NA	NA	NA	NA	NA	NA	NA	NA	NA	203.8	NA	NA	1	0.004310345	3	1344	231	NA	NA	187	-457	NA	NA	489573	0.41082	NA	0.066989957	0.003058554	0.000386796	1.07E-05	2	NA	0.001404494	0.5
YPL187W	MF(ALPHA)1;MF-ALPHA-1;MFAL1	chrXVI	193648	194145	+	HT	998	82	498	92919	59289	152208	1	YES	SAGA/TFIID	NA	NA	NA	-0.220238095	0.748203972	G+E	40.52592	0	6.994266	2.968444	0.008544331	10.57504375	9	NA	NA	5.127986806	1.654564328	0.250838924	NA	NA	NA	Lethal	NA	1.0002	NA	NA	5	178.4	Y	8	5	0.00501002	4	14	157	6	165	290	-232	YES	UNCLEAR	193648	0.4753	0.043103448	0.000700451	0.059147293	4.48E-05	0.003329893	1	NA	0.001006036	0.5
YDL247W	MPH2	chrIV	5985	7814	+	HT	3032	25	1830	29472	13902	43374	2	YES	TFIID	NA	NA	NA	NA	NA	NA	NA	NA	NA	NA	NA	1.39447	5	NA	NA	1.564791416	0.056545819	0.151965077	NA	NA	NA	NA	NA	NA	NA	NA	NA	100.1	NA	NA	19	0.006266491	4	46	106	NA	NA	283	-181	YES	UNCLEAR	5985	0.33839	NA	NA	NA	NA	0.000232698	3	NA	0.000273373	0.5
YDR194W-A	YDR194W-A;smORF123	chrIV	848071	848223	+	HH	125	0	153	0	0	0	NA	NA	NA	NA	NA	NA	NA	NA	NA	NA	NA	NA	NA	NA	NA	NA	NA	NA	NA	NA	NA	NA	NA	NA	Lethal	NA	NA	NA	NA	NA	128	N	48	0	0	4	97	153	49	201	250	22	YES	DPN	683710	NA	NA	NA	NA	NA	NA	NA	NA	0.003289474	0.5
YFL061W	DDI2	chrVI	9545	10222	+	HT	1980	16	678	16917	5784	22701	2	YES	SAGA/TFIID	NA	NA	NA	NA	NA	NA	NA	NA	NA	NA	NA	0.16124697	14	NA	NA	1.698988608	1.023172725	0.595365974	NA	NA	NA	NA	NA	NA	NA	NA	NA	144.3	NA	-178	12	0.006060606	4	55	119	59	156	215	-194	UNCLEAR	UNCLEAR	9545	0.39718	NA	NA	NA	NA	6.25E-05	3	NA	0.000738552	0.5
YGL138C	YGL138C;G2816	chrVII	248494	249531	-	HH	338	23	1038	27180	10766	37946	0	NO	TFIID	NA	NA	NA	-0.390937829	0.420958808	NA	NA	NA	NA	NA	NA	0.582536667	6	NA	NA	2.367201117	0.079808345	0.119340814	NA	NA	NA	Lethal	NA	1.00408	0.9926	NA	NA	109	N	NA	2	0.00591716	3	142	24	NA	NA	311	-99	YES	DPN	248494	0.38503	0.025862069	NA	NA	NA	3.16E-05	2	NA	0.00048216	0.5
YOR388C	FDH1	chrXV	1071793	1072923	-	HH	1290	42	1131	46140	22631	68771	0	NO	TFIID	NA	NA	NA	NA	NA	NA	NA	NA	NA	NA	NA	1.680742111	8	NA	NA	2.256917755	0.150907022	0.172123033	NA	NA	NA	NA	NA	NA	NA	NA	NA	154.5	NA	NA	8	0.00620155	3	152	26	NA	NA	256	-285	YES	UNCLEAR	18368	0.56708	NA	6.82E-05	9.10E-05	9.75E-05	0.001343491	3	NA	0.000884956	1
YDR374C	PHO92;MRB1	chrIV	1223474	1224394	-	HH	363	0	921	0	0	0	0	NO	NA	NA	NA	NA	0.376068376	0.484498863	NA	NA	NA	NA	NA	NA	0.409327778	9	NA	NA	2.778180118	0.065544711	0.092152777	NA	NA	NA	Lethal	NA	1.00403	0.99904	NA	NA	118.3	N	NA	2	0.005509642	5	71	117	NA	NA	196	-451	NA	NA	307539	0.54904	0.07183908	0.000327095	0.000100726	0.0009586	3.50E-05	3	NA	0.001086957	1
YEL035C	UTR5	chrV	85045	85545	-	HH	131	24	501	25881	7289	33170	NA	NA	TFIID	NA	NA	NA	-0.38125	0.562913541	NA	NA	NA	NA	NA	NA	0.299270265	12	NA	NA	2.864315259	0.264270316	0.179474758	NA	NA	NA	Essential	Essential	0	NA	NA	NA	97	N	NA	0	0	2	179	148	NA	NA	357	-223	YES	UNCLEAR	85045	0.32056	0.031609195	0.00055048	0.000114614	6.53E-05	3.00E-05	1	NA	0.002	1
YDL114W	YDL114W	chrIV	255604	256530	+	HH	478	23	927	35151	13019	48170	0	NO	NA	NA	NA	NA	-0.533950617	0.322037888	NA	NA	NA	NA	NA	NA	0.643369167	10	NA	NA	2.920403826	0.066809372	0.088506626	NA	NA	NA	Lethal	NA	1.02643	1.01179	NA	NA	140.7	Y	NA	2	0.0041841	3	169	40	NA	NA	303	-262	YES	UNCLEAR	255604	0.49665	0.054597701	0.000177372	0.00016673	0.000828397	9.42E-06	2	NA	0.001079914	1
YLR406C-A	YLR406C-A	chrXII	932206	932355	-	HH	612	6	150	4878	1109	5987	NA	NA	NA	NA	NA	NA	NA	NA	NA	NA	NA	NA	NA	NA	NA	NA	NA	NA	3.557114044	0.204216765	0.127042171	NA	NA	NA	Lethal	NA	NA	NA	NA	1	227.6	N	-120	2	0.003267974	3	67	134	187	14	285	-209	YES	UNCLEAR	145822	NA	NA	0.000589863	0.000308819	6.00E-05	NA	NA	NA	0.006711409	1
YFL060C	SNO3	chrVI	10301	10969	-	HH	394	29	669	30852	27322	58174	0	NO	SAGA/TFIID	NA	NA	NA	NA	NA	G+E	40.52592	0	6.994266	2.968444	0.008544331	3.858456504	13	NA	NA	2.418287937	2.161173908	0.607906586	NA	NA	NA	Lethal	NA	0	NA	NA	NA	119.5	Y	140	1	0.002538071	2	167	38	27	178	401	-113	YES	DPN	10301	0.47842	0.07183908	0.000123046	0.000415608	1.45E-05	0.000237783	2	NA	0.001497006	1
YJR150C	DAN1;CCW13	chrX	708811	709707	-	HT	2548	54	897	49296	22234	71530	0	NO	SAGA/TFIID	NA	NA	NA	-0.125	0.783633217	NA	NA	NA	NA	NA	NA	1.307522917	4	NA	NA	2.926107478	0.241740277	0.168028997	NA	NA	NA	Lethal	NA	1.02367	NA	NA	1	303	Y	NA	13	0.005102041	4	44	111	NA	NA	262	-186	YES	UNCLEAR	36044	0.99727	0.054597701	0.121988169	0.001753914	17.09795554	NA	1	NA	0.001116071	1
YJR156C	THI11	chrX	728574	729596	-	HH	2844	54	1023	53052	17908	70960	2	YES	TFIID	NA	NA	NA	NA	NA	NA	NA	NA	NA	NA	NA	1.039715942	14	NA	NA	2.731578859	0.077433182	0.101870822	NA	NA	NA	NA	NA	NA	NA	NA	NA	156.1	NA	NA	17	0.005977496	3	109	96	NA	NA	196	-327	NO	OPN	16155	0.86167	NA	1.37E-05	0.04555854	1.57E-05	9.44E-05	3	NA	0.000978474	1
YAR035C-A	YAR035C-A	chrI	192337	192417	-	HH	202	3	81	4041	1750	5791	NA	NA	NA	NA	NA	NA	NA	NA	NA	NA	NA	NA	NA	NA	NA	NA	NA	NA	NA	NA	NA	NA	NA	NA	Lethal	NA	NA	NA	NA	NA	127.7	N	NA	0	0	4	98	204	NA	NA	302	23	YES	DPN	37801	NA	NA	NA	NA	NA	NA	NA	NA	0.0125	1
YDR034C-A	YDR034C-A	chrIV	520516	520692	-	HH	622	51	177	45495	36043	81538	NA	NA	NA	NA	NA	NA	NA	NA	NA	NA	NA	NA	NA	NA	0.108264167	6	NA	NA	NA	NA	NA	NA	NA	NA	NA	NA	NA	NA	NA	NA	80.2	NA	-214	2	0.003215434	3	30	111	103	344	447	-186	YES	UNCLEAR	520516	NA	NA	NA	NA	NA	0.000130328	NA	NA	0.005681818	1
YFL062W	COS4	chrVI	6426	7565	+	HH	2580	47	1140	46824	18736	65560	0	NO	TFIID	NA	NA	NA	NA	NA	G+E	40.52592	0	6.994266	2.968444	0.008544331	0.267568996	17	7.038	0	3.205482143	1.111181937	0.328851044	NA	NA	NA	NA	NA	NA	NA	NA	NA	112.1	NA	NA	14	0.005426357	4	71	217	NA	NA	288	-4	YES	DPN	6426	0.44141	NA	NA	NA	NA	4.71E-05	2	NA	0.000877963	1
YHR086W-A	YHR086W-A	chrVIII	280231	280392	+	HT	507	1	162	0	0	0	NA	NA	NA	NA	NA	NA	NA	NA	NA	NA	NA	NA	NA	NA	NA	NA	NA	NA	NA	NA	NA	NA	NA	NA	Lethal	NA	NA	NA	NA	NA	119.5	N	NA	1	0.001972387	2	1099	390	NA	NA	153	-465	NA	NA	280231	NA	NA	NA	NA	NA	NA	NA	NA	0.00621118	1
YHR185C	PFS1;ADY1	chrVIII	474627	475340	-	HT	659	22	714	21165	8528	29693	0	NO	NA	NA	NA	NA	0.06122449	0.921587541	G+E	40.52592	0	6.994266	2.968444	0.008544331	2.4642	2	NA	NA	2.717591155	0.093244054	0.112363809	NA	NA	NA	Lethal	NA	1.02859	NA	81	NA	163.4	N	NA	4	0.006069803	4	107	81	NA	NA	170	-156	NO	OPN	87303	0.4501	0.00862069	NA	NA	NA	7.42E-05	3	NA	0.001402525	1
YKL106C-A	YKL106C-A	chrXI	237147	237266	-	HH	270	3	120	6210	2551	8761	NA	NA	NA	NA	NA	NA	NA	NA	NA	NA	NA	NA	NA	NA	0.044016521	17	1.114	0.377212	NA	NA	NA	NA	NA	NA	Lethal	NA	NA	NA	NA	2	217.6	N	4	2	0.007407407	4	134	12	130	16	242	-261	YES	UNCLEAR	237147	NA	NA	NA	NA	NA	2.97E-05	NA	NA	0.008403361	1
YLR162W-A	RRT15	chrXII	490406	490594	+	HT	477	11	189	12321	4977	17298	NA	NA	NA	NA	NA	NA	NA	NA	NA	NA	NA	NA	NA	NA	NA	NA	NA	NA	NA	NA	NA	NA	NA	NA	NA	NA	NA	NA	NA	NA	240.3	NA	NA	0	0	0	511	1064	NA	NA	NA	NA	NA	NA	490406	NA	NA	NA	NA	NA	NA	NA	NA	0.005319149	1
YLR464W	YLR464W	chrXII	1066572	1067501	+	HT	8	34	651	33042	12794	45836	0	NO	TFIID	NA	NA	NA	NA	NA	G+E	40.52592	0	6.994266	2.968444	0.008544331	1.182589823	16	NA	NA	NA	NA	NA	NA	NA	NA	NA	NA	NA	NA	NA	NA	NA	NA	NA	0	0	4	147	14	NA	NA	236	-89	YES	DPN	10676	0.3651	NA	NA	NA	NA	0.000160734	1	NA	0.001076426	1
YMR175W-A	YMR175W-A	chrXIII	611314	611508	+	HT	59	0	195	0	0	0	NA	NA	NA	TATA-containing	0	TAF1-enriched	NA	NA	NA	NA	NA	NA	NA	NA	NA	NA	NA	NA	5.447036521	0.839213073	0.168180575	NA	NA	NA	Lethal	NA	NA	NA	NA	NA	118.3	N	NA	1	0.016949153	3	87	51	NA	NA	282	-126	YES	DPN	312923	NA	NA	NA	NA	NA	NA	NA	NA	0.005154639	1
YOR255W	OSW1	chrXV	807271	808107	+	HH	248	36	837	40389	14333	54722	0	NO	TFIID	NA	NA	NA	-0.731778426	0.171197675	NA	NA	NA	NA	NA	NA	0.51880446	9	NA	NA	2.811695686	0.10876292	0.117293005	NA	NA	NA	Lethal	NA	1.04532	0.99665	NA	1	226.3	N	-150	0	0	3	21	248	171	98	269	-54	YES	DPN	283184	0.29433	0.025862069	NA	NA	NA	0.001652165	2	NA	0.001196172	1
YPL152W-A	YPL152W-A	chrXVI	264602	264700	+	HH	410	0	99	0	0	0	NA	NA	NA	NA	NA	NA	NA	NA	NA	NA	NA	NA	NA	NA	NA	NA	NA	NA	4.619530726	0.268279937	0.112123395	NA	NA	NA	Lethal	NA	NA	NA	NA	2	372.4	N	-32	2	0.004878049	3	108	26	6	249	255	-101	YES	DPN	264602	NA	NA	NA	NA	NA	NA	NA	NA	0.010204082	1
YPR159C-A	YPR159C-A	chrXVI	860314	860415	-	HH	891	5	102	6618	2224	8842	NA	NA	NA	NA	NA	NA	NA	NA	NA	NA	NA	NA	NA	NA	NA	NA	NA	NA	4.729881981	0.237828907	0.103105543	NA	NA	NA	Lethal	NA	NA	NA	NA	NA	300.4	N	NA	2	0.002244669	1	54	648	NA	NA	NA	NA	NA	NA	87651	NA	NA	NA	NA	NA	NA	NA	NA	0.00990099	1
YOL131W	YOL131W	chrXV	73031	73357	+	HT	316	21	327	19524	9160	28684	0	NO	NA	NA	NA	NA	-3.173913043	0.009268357	NA	NA	NA	NA	NA	NA	4.6372	3	NA	NA	2.919968987	0.350535644	0.202762601	NA	NA	NA	Lethal	NA	1.01662	1.01582	NA	NA	206.5	N	NA	1	0.003164557	4	0	0	NA	NA	219	-75	UNCLEAR	UNCLEAR	73031	0.4984	0.08045977	2.46E-05	1.71E-05	5.35E-05	4.60E-05	3	NA	0.004601227	1.5
YER085C	YER085C	chrV	327619	328140	-	HH	337	20	522	33282	11630	44912	0	NO	NA	NA	NA	NA	NA	NA	NA	NA	NA	NA	NA	NA	0.396614568	14	NA	NA	2.672593389	0.128949061	0.13436192	NA	NA	NA	Lethal	NA	1.03028	0.98527	NA	2	97.7	N	NA	1	0.002967359	3	2	302	NA	NA	304	-73	YES	DPN	248734	0.229	0.060344828	0.000609422	0.001105756	0.000810707	2.38E-06	1	NA	0.002879079	1.5
YGL262W	YGL262W;NRB175	chrVII	5312	5839	+	HT	1380	21	528	28527	10302	38829	0	NO	NA	NA	NA	NA	NA	NA	NA	NA	NA	NA	NA	NA	0.599417324	14	NA	NA	4.082181115	0.67455971	0.201195346	NA	NA	NA	Lethal	NA	1.03091	1.01344	NA	NA	108.1	N	NA	8	0.005797101	3	108	141	NA	NA	211	-216	UNCLEAR	UNCLEAR	5312	0.47552	0.022988506	0.001737107	0.007407076	0.011912195	4.23E-05	3	NA	0.0028463	1.5
YDL244W	THI13	chrIV	16204	17226	+	HH	2844	31	1023	40380	17375	57755	0	NO	TFIID	NA	NA	NA	NA	NA	NA	NA	NA	NA	NA	NA	1.113634661	15	NA	NA	1.814343966	0.696523426	0.45998984	NA	NA	NA	NA	NA	NA	NA	28	NA	335.8	NA	-264	16	0.005625879	4	88	105	159	27	193	13	NO	OPN	16204	0.7535	NA	1.33E-05	0.040992748	1.19E-05	1.68E-05	3	NA	0.00146771	1.5
YNL332W	THI12	chrXIV	14832	15854	+	HT	669	54	1023	53253	18593	71846	2	YES	TFIID	NA	NA	NA	NA	NA	NA	NA	NA	NA	NA	NA	0.621926311	15	NA	NA	NA	NA	NA	NA	NA	NA	Lethal	NA	1.01214	NA	NA	NA	170.5	Y	NA	5	0.007473842	4	122	105	NA	NA	148	-304	NO	OPN	14832	0.60837	0.103448276	4.96E-05	0.855038772	0.000435802	0.000175313	3	NA	0.00146771	1.5
YAL018C	YAL018C;YAL003	chrI	118564	119541	-	HH	684	34	978	34854	16429	51283	1	YES	NA	NA	NA	NA	-3.2	0.000331403	NA	NA	NA	NA	NA	NA	0.13152381	7	NA	NA	2.240598248	0.152134059	0.174080143	NA	NA	NA	Lethal	NA	1.02535	0.97897	NA	1	104.3	Y	NA	4	0.005847953	4	115	48	NA	NA	176	-273	NO	OPN	110677	0.35404	0.07183908	NA	NA	NA	0.000659745	2	NA	0.001535312	1.5
YBR298C-A	YBR298C-A	chrII	805035	805256	-	HH	95	2	222	0	0	0	NA	NA	NA	NA	NA	NA	NA	NA	NA	NA	NA	NA	NA	NA	NA	NA	NA	NA	NA	NA	NA	NA	NA	NA	NA	NA	NA	NA	NA	NA	297.7	NA	-194	1	0.010526316	5	87	64	130	42	185	-311	NO	OPN	7928	NA	NA	NA	NA	NA	NA	NA	NA	0.00678733	1.5
YCR104W	PAU3	chrIII	307801	308175	+	HH	2334	59	375	58203	21324	79527	2	YES	TFIID	NA	NA	NA	NA	NA	NA	NA	NA	NA	NA	NA	0.36880917	16	NA	NA	2.553413974	0.85245257	0.361587894	NA	NA	NA	NA	NA	NA	NA	15	NA	NA	NA	-287	14	0.005998286	4	116	62	63	88	162	-137	NO	OPN	8445	0.70471	NA	NA	NA	NA	6.06E-05	1	NA	0.004010695	1.5
YHR022C-A	YHR022C-A	chrVIII	151217	151306	-	HH	360	5	90	6399	3646	10045	NA	NA	NA	TATA-less	1	TAF1-enriched	NA	NA	NA	NA	NA	NA	NA	NA	NA	NA	NA	NA	NA	NA	NA	NA	NA	NA	Lethal	NA	NA	NA	NA	1	124.1	N	NA	1	0.002777778	2	591	286	NA	NA	239	-361	YES	UNCLEAR	151217	NA	NA	NA	NA	NA	NA	NA	NA	0.016853933	1.5
YHR126C	ANS1	chrVIII	359702	360181	-	HH	732	30	480	38553	13899	52452	1	YES	NA	NA	NA	NA	-0.25	0.733269963	NA	NA	NA	NA	NA	NA	0.320385268	8	NA	NA	3.140205446	0.342702542	0.186423476	NA	NA	NA	Lethal	NA	1.01277	0.99401	NA	NA	168.5	N	NA	5	0.006830601	5	0	0	NA	NA	165	-355	NO	OPN	202462	0.20453	0.043103448	NA	NA	NA	0.001086143	1	NA	0.003131524	1.5
YML047C	PRM6	chrXIII	180017	181075	-	HH	399	29	1059	32667	14237	46904	NA	YES	NA	NA	NA	NA	0.24	0.565726219	NA	NA	NA	NA	NA	NA	3.249577778	9	NA	NA	2.552620423	0.14481034	0.149077996	NA	NA	NA	Lethal	NA	0.95939	NA	NA	NA	114.6	Y	NA	3	0.007518797	5	75	85	NA	NA	175	-434	NA	NA	180017	0.37654	0.011494253	NA	NA	NA	8.92E-05	2	NA	0.001417769	1.5
YPL278C	YPL278C	chrXVI	15053	15355	-	HT	50	38	303	34212	13894	48106	0	NO	TFIID	NA	NA	NA	NA	NA	NA	NA	NA	NA	NA	NA	0.451603512	17	3.152	0.005931	4.549234365	0.374980519	0.134606503	NA	NA	NA	NA	NA	NA	NA	NA	NA	158.4	NA	NA	0	0	4	15	137	NA	NA	199	-212	NO	OPN	15053	0.33583	NA	NA	NA	NA	0.001158722	3	NA	0.004966887	1.5
YPL021W	ECM23;SRD2	chrXVI	511101	511664	+	HT	1102	30	564	32781	10660	43441	0	NO	TFIID	NA	NA	NA	-0.923344948	0.20324132	NA	NA	NA	NA	NA	NA	0.094082386	12	NA	NA	3.046585399	0.116239086	0.111908413	NA	NA	NA	Lethal	NA	1.02207	NA	NA	NA	226	N	NA	6	0.005444646	4	158	9	NA	NA	233	-244	YES	UNCLEAR	436402	0.69519	0.063218391	NA	NA	NA	0.000120666	3	NA	0.002664298	1.5
YAL063C-A	YAL063C-A	chrI	22395	22685	-	HT	1315	5	291	2436	672	3108	NA	NA	NA	NA	NA	NA	NA	NA	NA	NA	NA	NA	NA	NA	NA	NA	NA	NA	2.923730678	0.375788826	0.209669165	NA	NA	NA	NA	NA	NA	NA	NA	NA	120.5	NA	NA	8	0.00608365	5	100	59	NA	NA	169	-267	NO	OPN	22395	NA	NA	7.16E-05	5.38E-05	3.10E-05	NA	NA	NA	0.006896552	2
YHR213W-B	YHR213W-B	chrVIII	540800	541099	+	HT	18	5	300	4182	1552	5734	NA	NA	NA	NA	NA	NA	NA	NA	NA	NA	NA	NA	NA	NA	NA	NA	NA	NA	NA	NA	NA	NA	NA	NA	NA	NA	NA	NA	NA	NA	296.1	NA	NA	0	0	3	5	195	NA	NA	259	-270	YES	UNCLEAR	21544	NA	NA	0.000211929	7.92E-05	6.45E-05	NA	NA	NA	0.006688963	2
YNL277W-A	YNL277W-A	chrXIV	116679	116867	+	HT	226	8	189	6936	1830	8766	NA	NA	NA	TATA-containing	0	TAF1-enriched	NA	NA	NA	NA	NA	NA	NA	NA	NA	NA	NA	NA	3.972575708	0.105239711	0.081661554	NA	NA	NA	Lethal	NA	NA	NA	NA	3	117.4	N	NA	1	0.004424779	4	50	83	NA	NA	261	-158	YES	UNCLEAR	116679	NA	NA	0.000150767	0.000104433	0.000621091	NA	NA	NA	0.010638298	2
YBR182C-A	YBR182C-A	chrII	595361	595555	-	HH	560	5	195	6882	2537	9419	NA	NA	NA	NA	NA	NA	NA	NA	NA	NA	NA	NA	NA	NA	NA	NA	NA	NA	3.386880444	0.244112601	0.145879824	NA	NA	NA	Lethal	NA	NA	NA	NA	1	268.8	N	NA	2	0.003571429	3	20	327	NA	NA	347	-55	YES	DPN	217629	NA	NA	9.82E-05	0.000180155	0.000306394	NA	NA	NA	0.010309278	2
YER078W-A	YER078W-A	chrV	318646	318810	+	HH	304	3	165	6945	1807	8752	NA	NA	NA	TATA-less	2	TAF1-enriched	NA	NA	NA	NA	NA	NA	NA	NA	NA	NA	NA	NA	3.607897395	0.32442581	0.157871422	NA	NA	NA	NA	NA	NA	NA	NA	NA	214	NA	-83	1	0.003289474	3	192	140	275	57	180	-215	NO	OPN	258064	NA	NA	0.001165471	0.000411897	0.000488712	NA	NA	NA	0.012195122	2
YKR034W	DAL80;UGA43	chrXI	506898	507707	+	HH	503	27	810	38388	14150	52538	1	YES	NA	NA	NA	NA	-4.454545455	0.000493326	NA	NA	NA	NA	NA	NA	9.63605	2	NA	NA	7.339351261	0.030091205	0.023635354	NA	NA	NA	Lethal	NA	1.0305	NA	NA	NA	191.9	Y	NA	3	0.005964215	4	116	34	NA	NA	165	-109	NO	OPN	159109	1.5063	0.002873563	0.006803718	0.000458149	0.00032043	8.60E-05	2	NA	0.002472188	2
YCL048W-A	YCL048W-A	chrIII	41488	41727	+	HH	764	0	240	0	0	0	NA	NA	NA	NA	NA	NA	-5.75	0.114728897	NA	NA	NA	NA	NA	NA	NA	NA	NA	NA	5.283697419	0.700555588	0.15841028	NA	NA	NA	NA	NA	NA	NA	NA	NA	192.8	NA	NA	5	0.006544503	5	36	142	NA	NA	179	-217	NO	OPN	41488	NA	NA	0.000310106	0.000480618	0.000311651	NA	NA	NA	0.008368201	2
YLR307W	CDA1	chrXII	745620	746525	+	HT	769	33	906	42636	16607	59243	0	NO	SAGA/TFIID	NA	NA	NA	-2.823529412	0.008346611	NA	NA	NA	NA	NA	NA	0.454344167	6	NA	NA	4.835918303	0.340517894	0.120667694	NA	NA	NA	Lethal	NA	1.03057	NA	22	1	263.2	Y	NA	4	0.00520156	3	140	28	NA	NA	257	-103	YES	DPN	331652	0.85791	0.146551724	1.624571312	0.000629457	0.027145485	4.85E-05	1	NA	0.002209945	2
YBR296C-A	YBR296C-A	chrII	800123	800242	-	HH	281	3	120	4041	1750	5791	NA	NA	NA	NA	NA	NA	NA	NA	NA	NA	NA	NA	NA	NA	NA	NA	NA	NA	NA	NA	NA	NA	NA	NA	Lethal	NA	NA	NA	NA	NA	264.4	N	49	1	0.003558719	4	50	267	1	316	317	-25	YES	DPN	12942	NA	NA	NA	NA	NA	NA	NA	NA	0.016806723	2
YGR273C	YGR273C;G9371	chrVII	1038715	1039239	-	HT	656	19	525	26328	8985	35313	0	NO	TFIID	NA	NA	NA	NA	NA	NA	NA	NA	NA	NA	NA	0.046373847	16	NA	NA	2.374999933	0.115346399	0.143000784	NA	NA	NA	Lethal	NA	1.0204	1.03085	NA	NA	124.9	Y	NA	4	0.006097561	4	147	41	NA	NA	177	-116	NO	OPN	51701	0.37359	0.028735632	NA	NA	NA	8.89E-05	3	NA	0.003816794	2
YLR307C-A	YLR307C-A	chrXII	746848	747111	-	HH	826	2	264	2436	672	3108	NA	NA	NA	NA	NA	NA	-5.428571429	0.105114466	NA	NA	NA	NA	NA	NA	NA	NA	NA	NA	4.505254677	0.609769641	0.173325935	NA	NA	NA	Lethal	NA	NA	NA	NA	NA	269.7	N	NA	5	0.006053269	4	75	69	NA	NA	193	-144	NO	OPN	331066	NA	NA	NA	NA	NA	NA	NA	NA	0.007604563	2
YOR011W-A	YOR011W-A	chrXV	355652	355858	+	HT	1789	0	207	0	0	0	NA	NA	NA	NA	NA	NA	NA	NA	NA	NA	NA	NA	NA	NA	NA	NA	NA	NA	NA	NA	NA	NA	NA	NA	NA	NA	NA	NA	NA	NA	249.9	NA	NA	9	0.005030743	4	148	8	NA	NA	187	-83	NO	OPN	355652	NA	NA	NA	NA	NA	NA	NA	NA	0.009708738	2
YOL024W	YOL024W	chrXV	277086	277604	+	HT	147	33	519	39648	18211	57859	0	NO	NA	NA	NA	NA	-1.684210526	0.051592224	NA	NA	NA	NA	NA	NA	0.1458	2	NA	NA	3.843191876	0.197971724	0.115773594	NA	NA	NA	Lethal	NA	1.02513	NA	NA	NA	203.3	N	NA	1	0.006802721	4	155	21	NA	NA	171	-262	NO	OPN	277086	0.15027	0.002873563	0.000147245	6.40E-05	0.000112347	1.20E-05	3	NA	0.004826255	2.5
YNR073C	YNR073C;N3810	chrXIV	774792	776300	-	HT	1302	37	1509	34671	19541	54212	2	YES	TFIID	NA	NA	NA	NA	NA	NA	NA	NA	NA	NA	NA	0.308474106	15	NA	NA	3.454019215	0.660751168	0.235339172	NA	NA	NA	Lethal	NA	1.00887	0.99361	NA	4	220.1	Y	15	7	0.005376344	4	55	88	40	103	214	-163	UNCLEAR	UNCLEAR	8033	0.61005	0.017241379	0.001167449	9.35E-05	0.000767737	2.85E-05	3	NA	0.001657825	2.5
YIL134C-A	YIL134C-A	chrIX	96522	96725	-	HH	670	1	204	2436	672	3108	NA	NA	NA	TATA-containing	0	TAF1-depleted	NA	NA	NA	NA	NA	NA	NA	NA	NA	NA	NA	NA	3.728210238	0.36513154	0.162078079	NA	NA	NA	Lethal	NA	NA	NA	NA	NA	162.2	N	NA	4	0.005970149	4	63	105	NA	NA	294	-180	YES	UNCLEAR	96522	NA	NA	0.000653568	0.000100747	0.000406127	NA	NA	NA	0.012315271	2.5
YML007C-A	YML007C-A	chrXIII	253162	253272	-	HH	576	7	111	7764	3869	11633	NA	NA	NA	TATA-less	1	TAF1-enriched	NA	NA	NA	NA	NA	NA	NA	NA	0.968408333	13	NA	NA	3.98803956	0.185178242	0.107903497	131	22.825	0.955	Lethal	NA	NA	NA	NA	5	129.8	N	-49	2	0.003472222	4	73	225	122	176	298	-2	YES	DPN	253162	NA	NA	0.000590339	0.000101013	0.003476343	0.000634013	NA	NA	0.022727273	2.5
YLR308W	CDA2	chrXII	747937	748875	+	HH	826	26	939	35217	11745	46962	0	NO	TFIID	NA	NA	NA	-3.326923077	0.001727673	NA	NA	NA	NA	NA	NA	0.3351775	6	NA	NA	2.467372924	0.068919202	0.106398456	NA	NA	NA	Lethal	NA	1.03312	NA	26	NA	249.9	Y	NA	5	0.006053269	4	109	79	NA	NA	188	-451	NA	NA	329302	0.56362	0.126436782	0.005361381	0.000158836	0.002708014	0.000211032	3	NA	0.002665245	2.5
YOL164W-A	YOL164W-A	chrXV	4130	4312	+	HH	2052	5	183	4503	1230	5733	NA	NA	NA	NA	NA	NA	NA	NA	NA	NA	NA	NA	NA	NA	NA	NA	NA	NA	NA	NA	NA	NA	NA	NA	Lethal	NA	NA	NA	NA	NA	173.1	N	NA	12	0.005847953	4	54	166	NA	NA	220	-21	UNCLEAR	UNCLEAR	4130	NA	NA	0.000239168	0.000162397	0.000143335	NA	NA	NA	0.013736264	2.5
YOR381W-A	YOR381W-A	chrXV	1058423	1058590	+	HT	743	3	168	4041	1750	5791	NA	NA	NA	NA	NA	NA	NA	NA	NA	NA	NA	NA	NA	NA	NA	NA	NA	NA	4.646686441	0.450669724	0.144472712	NA	NA	NA	NA	NA	NA	NA	NA	NA	150.8	NA	NA	4	0.00538358	5	88	62	NA	NA	180	-287	NO	OPN	32701	NA	NA	6.27E-05	0.000181672	0.000359846	NA	NA	NA	0.01497006	2.5
YOL162W	YOL162W;O0235	chrXV	10119	10766	+	HT	13	36	648	46314	15777	62091	0	NO	TFIID	NA	NA	NA	NA	NA	NA	NA	NA	NA	NA	NA	2.35445	2	NA	NA	2.518388941	0.831167544	0.362010764	NA	NA	NA	Lethal	NA	1.01348	1.01055	NA	2	210.1	Y	NA	0	0	5	18	159	NA	NA	177	-57	NO	OPN	10119	0.72323	0.043103448	0.000161123	0.000194047	0.000245386	0.000195079	3	NA	0.003863988	2.5
YGR294W	PAU12	chrVII	1080306	1080668	+	HT	1953	63	363	55428	17026	72454	2	YES	SAGA/TFIID	NA	NA	NA	NA	NA	G+E	40.52592	0	6.994266	2.968444	0.008544331	0.244924643	17	1.638	0.105654	NA	NA	NA	NA	NA	NA	NA	NA	NA	NA	64	NA	127.6	NA	NA	12	0.006144393	4	139	20	NA	NA	205	-417	NA	NA	10272	0.2619	NA	0.000135246	0.000241057	0.000152615	1.45E-05	1	NA	0.006906077	2.5
YJL028W	YJL028W;J1267	chrX	391311	391646	+	HH	458	12	336	7725	1732	9457	NA	NA	NA	TATA-less	1	TAF1-enriched	NA	NA	NA	NA	NA	NA	NA	NA	1.889691667	4	NA	NA	3.012160037	0.137358946	0.123041164	NA	NA	NA	Lethal	NA	1.03625	0.99135	NA	NA	175.7	N	NA	2	0.004366812	4	88	64	NA	NA	221	-139	UNCLEAR	UNCLEAR	354105	0.47744	0.045977011	0.000166601	0.000354964	0.000286444	1.23E-05	1	NA	0.007462687	2.5
YIL102C	YIL102C	chrIX	174582	174887	-	HT	420	38	306	37506	18645	56151	0	NO	NA	NA	NA	NA	NA	NA	NA	NA	NA	NA	NA	NA	0.0242	2	NA	NA	NA	NA	NA	NA	NA	NA	Lethal	NA	1.01496	0.92469	NA	NA	160.9	N	NA	1	0.002380952	2	173	8	NA	NA	485	-83	YES	DPN	174582	0.3633	0.137931034	NA	NA	NA	0.000150321	2	NA	0.008196721	2.5
YJL136W-A	YJL136W-A	chrX	156169	156252	+	HH	42	1	84	2067	558	2625	NA	NA	NA	NA	NA	NA	NA	NA	NA	NA	NA	NA	NA	NA	NA	NA	NA	NA	NA	NA	NA	NA	NA	NA	Lethal	NA	NA	NA	NA	NA	162.4	N	NA	0	0	4	3	173	NA	NA	185	-248	NO	OPN	156169	NA	NA	NA	NA	NA	NA	NA	NA	0.030120482	2.5
YJR160C	MPH3	chrX	738008	739816	-	HT	3032	13	1809	14568	6370	20938	2	YES	TFIID	NA	NA	NA	NA	NA	NA	NA	NA	NA	NA	NA	1.038792584	9	NA	NA	1.740061875	0.054313951	0.133934052	NA	NA	NA	NA	NA	NA	NA	NA	NA	246.6	NA	NA	18	0.005936675	4	49	97	NA	NA	277	-172	YES	UNCLEAR	5935	0.42348	NA	NA	NA	NA	2.93E-05	3	NA	0.001382743	2.5
YMR175W	SIP18	chrXIII	611016	611255	+	HH	651	36	240	28608	13408	42016	1	YES	SAGA	NA	NA	NA	-3.666666667	0.035880051	NA	NA	NA	NA	NA	NA	0.893901356	16	NA	NA	7.330651614	1.064859083	0.140767854	NA	NA	NA	Lethal	NA	NA	NA	NA	4	118.6	N	-21	4	0.006144393	3	247	35	268	14	280	-110	YES	DPN	313176	4.5882	0.100574713	NA	NA	NA	0.00280763	1	NA	0.010460251	2.5
YNL042W-B	YNL042W-B	chrXIV	547113	547370	+	HT	1236	3	258	2523	774	3297	NA	NA	NA	NA	NA	NA	NA	NA	NA	NA	NA	NA	NA	NA	NA	NA	NA	NA	3.505194389	0.512206492	0.204178699	NA	NA	NA	Lethal	NA	NA	NA	NA	NA	169.4	N	-30	6	0.004854369	3	863	79	893	49	216	-335	UNCLEAR	UNCLEAR	236963	NA	NA	NA	NA	NA	NA	NA	NA	0.009727626	2.5
YOR214C	YOR214C;YO50-4	chrXV	745593	746303	-	HT	422	29	711	29607	12823	42430	0	NO	NA	NA	NA	NA	-0.336236934	0.50637387	NA	NA	NA	NA	NA	NA	0.17405	2	NA	NA	2.683426747	0.128106374	0.133381509	48	NA	NA	Lethal	NA	1.0347	0.98085	64	NA	101.7	N	NA	2	0.004739336	4	21	184	NA	NA	205	-54	NO	OPN	344988	0.59433	0.014367816	NA	NA	NA	3.00E-05	2	NA	0.003521127	2.5
YPL033C	SRL4	chrXVI	487362	488207	-	HT	680	24	846	37083	12207	49290	3	YES	NA	NA	NA	NA	-0.099730458	0.82675425	NA	NA	NA	NA	NA	NA	0.256555291	15	NA	NA	3.324550085	0.357014526	0.17972565	NA	NA	NA	Lethal	NA	1.01876	1.01233	NA	1	236.7	N	NA	5	0.007352941	4	165	23	NA	NA	223	-98	UNCLEAR	UNCLEAR	459859	0.81117	0.094827586	NA	NA	NA	1.17E-05	1	NA	0.00295858	2.5
YFL011W	HXT10	chrVI	112345	113985	+	HT	1252	39	1641	51465	21014	72479	1	YES	TFIID	NA	NA	NA	-1.277777778	0.015365808	NA	NA	NA	NA	NA	NA	1.069819643	8	NA	NA	2.478130791	0.095560312	0.124742532	NA	NA	NA	Lethal	NA	1.00309	NA	112	NA	153.8	Y	-302	8	0.006389776	4	74	84	30	211	241	-347	YES	UNCLEAR	112345	0.5957	0.068965517	6.63E-05	2.44E-05	0.000171218	8.76E-06	1	NA	0.001829268	3
YHR214W	YHR214W	chrVIII	541651	542262	+	HT	552	51	612	47277	16983	64260	2	YES	SAGA	NA	NA	NA	NA	NA	NA	NA	NA	NA	NA	NA	2.498960016	14	NA	NA	1.476739253	0.87683419	0.634095862	NA	NA	NA	NA	NA	NA	NA	NA	NA	234	NA	-76	4	0.007246377	4	117	57	19	127	183	-422	NA	NA	20381	0.34568	NA	0.000116052	4.25E-05	6.23E-05	0.000589845	2	NA	0.004909984	3
YMR321C	YMR321C;YM9924.13C	chrXIII	917579	917896	-	HT	470	61	318	66945	23606	90551	0	NO	TFIID	NA	NA	NA	NA	NA	G+E	40.52592	0	6.994266	2.968444	0.008544331	0.289358226	17	7.245	0	4.458315372	0.867557322	0.208919176	NA	NA	NA	NA	NA	NA	NA	NA	NA	153	NA	NA	2	0.004255319	4	5	183	NA	NA	212	-258	UNCLEAR	UNCLEAR	6535	1.0577	NA	0.00010548	4.71E-05	3.59E-05	0.00070351	3	NA	0.009463722	3
YBL044W	YBL044W;YBL0404	chrII	135998	136366	+	HH	482	31	369	27345	18476	45821	NA	NA	NA	NA	NA	NA	-5.712328767	0.021213435	NA	NA	NA	NA	NA	NA	3.605784167	6	NA	NA	3.171574627	0.09220892	0.095743992	NA	NA	NA	Lethal	NA	1.01781	0.9659	NA	NA	211.7	N	NA	2	0.004149378	4	73	92	NA	NA	243	-167	YES	UNCLEAR	135998	0.47344	0.201149425	0.000200467	0.000147313	6.19E-05	1.23E-05	1	NA	0.008152174	3
YFL020C	PAU5	chrVI	99231	99599	-	HT	2029	33	369	27357	13953	41310	2	YES	TFIID	NA	NA	NA	-0.45	0.693808551	NA	NA	NA	NA	NA	NA	0.532095616	15	NA	NA	3.622567032	0.214032783	0.127709651	NA	NA	NA	Lethal	NA	1.03716	NA	NA	4	138.8	Y	NA	12	0.005914243	4	26	143	NA	NA	172	-218	NO	OPN	99231	0.26001	0.120689655	NA	NA	NA	1.12E-05	1	NA	0.008152174	3
YFL012W	YFL012W	chrVI	110647	111093	+	HH	717	32	447	49689	18282	67971	0	NO	NA	NA	NA	NA	-0.071428571	0.907072268	NA	NA	NA	NA	NA	NA	NA	NA	NA	NA	2.455511827	0.268486581	0.211017883	NA	NA	NA	Lethal	NA	1.02486	0.97499	NA	4	157.2	N	NA	4	0.005578801	4	123	52	NA	NA	180	-127	NO	OPN	110647	0.22349	0.022988506	NA	NA	NA	0.00088615	1	NA	0.006726457	3
YHR079C-A	SAE3	chrVIII	262192	262553	-	HT	248	18	276	15246	4533	19779	NA	NA	NA	NA	NA	NA	-2	0.253452144	NA	NA	NA	NA	NA	NA	0.270168372	17	0.781	0.68876	2.824924762	0.139322642	0.13213077	NA	NA	NA	NA	NA	NA	NA	NA	NA	107.8	NA	NA	2	0.008064516	4	134	10	NA	NA	174	-360	NO	OPN	262192	0.41315	NA	NA	NA	NA	7.22E-05	NA	NA	0.008310249	3
YLR466C-B	YLR466C-B	chrXII	1071594	1071710	-	HH	798	5	117	3963	2974	6937	NA	NA	NA	NA	NA	NA	NA	NA	NA	NA	NA	NA	NA	NA	NA	NA	NA	NA	NA	NA	NA	NA	NA	NA	NA	NA	NA	NA	NA	NA	108	NA	NA	4	0.005012531	4	78	75	NA	NA	362	-150	YES	UNCLEAR	6467	NA	NA	NA	NA	NA	NA	NA	NA	0.025862069	3
YMR272W-B	YMR272W-B	chrXIII	811089	811196	+	HH	312	2	108	3189	749	3938	NA	NA	NA	NA	NA	NA	NA	NA	NA	NA	NA	NA	NA	NA	NA	NA	NA	NA	NA	NA	NA	NA	NA	NA	Lethal	NA	NA	NA	NA	NA	278.5	N	47	2	0.006410256	4	74	127	27	174	201	-1	NO	OPN	113235	NA	NA	NA	NA	NA	NA	NA	NA	0.028037383	3
YIR013C	GAT4	chrIX	380019	380384	-	HH	702	21	366	24126	10166	34292	0	NO	NA	NA	NA	NA	-2.361111111	0.045860914	NA	NA	NA	NA	NA	NA	1.501857143	7	NA	NA	NA	NA	NA	NA	NA	NA	Lethal	NA	0.98747	NA	NA	NA	205.8	Y	NA	4	0.005698006	5	36	139	NA	NA	183	-321	NO	OPN	59504	0.26961	0.100574713	0.000532232	0.000103784	6.62E-05	1.41E-05	3	NA	0.009589041	3.5
YGL259W	YPS5	chrVII	8470	8967	+	HT	1380	28	498	42021	14478	56499	2	YES	TFIID	NA	NA	NA	NA	NA	NA	NA	NA	NA	NA	NA	1.449062815	11	NA	NA	3.119010434	0.227011715	0.152759176	NA	NA	NA	Lethal	NA	1.02396	NA	NA	NA	102.7	Y	NA	9	0.006521739	4	0	0	NA	NA	159	-344	NO	OPN	8470	1.2328	0.031609195	0.000141259	0.000188783	0.000518528	0.00020774	3	NA	0.007042254	3.5
YML133C	YML133C;YM4987.01C;YM4987.02C	chrXIII	461	4684	-	HH	2560	48	4125	55785	24799	80584	0	NO	TFIID	NA	NA	NA	NA	NA	NA	NA	NA	NA	NA	NA	0.831397199	17	16.954	0	NA	NA	NA	NA	NA	NA	NA	NA	NA	NA	NA	NA	105.9	NA	-409	14	0.00546875	3	206	59	64	198	176	-244	NO	OPN	461	0.24361	NA	7.42E-05	0.00040779	0.000179071	3.69E-05	2	NA	0.000828795	3.5
YNL334C	SNO2	chrXIV	12208	12876	-	HH	391	33	669	33756	14075	47831	0	NO	SAGA/TFIID	NA	NA	NA	NA	NA	G+E	40.52592	0	6.994266	2.968444	0.008544331	3.776179167	10	NA	NA	2.98211354	1.159626395	0.361106139	NA	NA	NA	Lethal	NA	1.02515	NA	NA	NA	159.9	Y	-47	2	0.00511509	3	167	48	214	1	234	-123	YES	DPN	12208	0.30752	0.020114943	0.000139286	0.000457946	1.63E-05	0.000238836	3	NA	0.005239521	3.5
YJL222W	VTH2	chrX	11475	16124	+	HH	2337	33	4650	35223	31063	66286	0	NO	TFIID	NA	NA	NA	NA	NA	G+E	40.52592	0	6.994266	2.968444	0.008544331	0.803143791	17	6.369	2.00E-06	0.964883297	2.380097121	1.598904596	NA	NA	NA	NA	NA	NA	NA	NA	NA	166.2	NA	8	14	0.005990586	4	65	193	57	201	258	-10	YES	DPN	11475	0.49676	NA	NA	NA	NA	2.88E-05	2	NA	0.00075285	3.5
YIL173W	VTH1	chrIX	11492	16141	+	HH	2337	26	4650	26766	14114	40880	0	NO	TFIID	NA	NA	NA	NA	NA	NA	NA	NA	NA	NA	NA	0.687933829	17	10.935	0	0.822173945	2.164734905	1.789528627	NA	NA	NA	Lethal	NA	1.01029	NA	NA	NA	175.5	Y	NA	13	0.005562687	4	34	186	NA	NA	220	-41	UNCLEAR	UNCLEAR	11492	0.2035	0.152298851	8.92E-05	7.49E-05	4.32E-05	0.000140077	3	NA	0.0008604	4
YNL033W	YNL033W;N2743	chrXIV	572999	573853	+	HT	684	38	855	46653	36859	83512	0	NO	SAGA/TFIID	NA	NA	NA	NA	NA	G+E	40.52592	0	6.994266	2.968444	0.008544331	0.299522917	4	NA	NA	1.945718327	0.314921875	0.288417391	NA	NA	NA	NA	NA	NA	NA	NA	NA	148.4	NA	NA	4	0.005847953	4	55	92	NA	NA	178	-332	NO	OPN	210480	0.35933	NA	8.35E-05	8.70E-05	1.01E-05	7.70E-05	2	NA	0.004683841	4
YEL070W	DSF1	chrV	19589	21097	+	HT	1744	39	1509	40227	22403	62630	2	YES	TFIID	NA	NA	NA	NA	NA	NA	NA	NA	NA	NA	NA	0.11046029	14	NA	NA	3.394347629	1.421139371	0.351206073	NA	NA	NA	NA	NA	NA	NA	76	NA	111.8	NA	NA	10	0.005733945	5	77	121	NA	NA	198	2	NO	OPN	19589	0.4293	NA	0.00092557	0.000109789	0.000445762	0.000266453	3	NA	0.00265252	4
YDR014W-A	HED1	chrIV	477797	478285	+	HT	1808	0	489	0	0	0	NA	NA	NA	NA	NA	NA	-0.375	0.539345958	NA	NA	NA	NA	NA	NA	NA	NA	NA	NA	2.933679012	0.203131253	0.153629911	NA	NA	NA	NA	NA	NA	NA	NA	NA	131.8	NA	-6	10	0.005530973	4	17	160	23	154	185	-411	NA	NA	477797	NA	NA	0.000494859	0.000134171	0.000399014	NA	NA	NA	0.008196721	4
YGR121W-A	YGR121W-A	chrVII	733412	733627	+	HH	485	4	216	6540	3448	9988	NA	NA	NA	TATA-less	2	TAF1-enriched	NA	NA	NA	NA	NA	NA	NA	NA	NA	NA	NA	NA	3.337550828	0.211558438	0.13781208	NA	NA	NA	Lethal	NA	NA	NA	NA	NA	194.1	N	-216	2	0.004123711	2	561	307	777	91	171	-382	NO	OPN	357313	NA	NA	4.32E-05	0.000140616	0.000302894	NA	NA	NA	0.018604651	4
YJL037W	IRC18	chrX	376662	377336	+	HH	888	17	675	21543	8123	29666	0	NO	TFIID	NA	NA	NA	NA	NA	NA	NA	NA	NA	NA	NA	0.888271503	16	NA	NA	4.049146819	0.519115409	0.17793789	NA	NA	NA	Lethal	NA	1.0251	0.96186	NA	NA	424.6	Y	NA	4	0.004504505	4	19	143	NA	NA	278	-388	YES	UNCLEAR	368415	0.44547	0.028735632	4.24E-05	0.000193219	0.000108528	0.000211443	3	NA	0.005934718	4
YLR445W	GMC2	chrXII	1024189	1024837	+	HT	218	19	567	18036	6109	24145	0	NO	NA	NA	NA	NA	-1.5	0.537860941	NA	NA	NA	NA	NA	NA	0.186789286	7	NA	NA	2.368667118	0.083291989	0.121842159	NA	NA	NA	Lethal	NA	1.0184	1.03824	NA	NA	126.2	N	NA	0	0	4	47	227	NA	NA	274	-28	YES	DPN	53340	0.35351	0.060344828	NA	NA	NA	0.000162035	3	NA	0.00617284	4
YOR161C-C	YOR161C-C	chrXV	639121	639267	-	HT	293	6	147	7113	3201	10314	NA	NA	NA	NA	NA	NA	NA	NA	NA	NA	NA	NA	NA	NA	NA	NA	NA	NA	3.801434835	0.351743776	0.15601475	NA	NA	NA	Lethal	NA	NA	NA	NA	NA	165.4	N	NA	1	0.003412969	3	689	40	NA	NA	264	-115	YES	DPN	452024	NA	NA	NA	NA	NA	NA	NA	NA	0.02739726	4
YPL130W	SPO19	chrXVI	304387	305058	+	HT	373	32	672	45717	16633	62350	1	YES	NA	NA	NA	NA	-2.733333333	0.025467551	NA	NA	NA	NA	NA	NA	0.350842992	12	NA	NA	2.831926647	0.147375997	0.135559943	NA	NA	NA	Lethal	NA	0.99474	NA	137	NA	313.8	N	NA	2	0.00536193	4	26	108	NA	NA	257	-351	YES	UNCLEAR	304387	0.84715	0.051724138	NA	NA	NA	1.18E-05	3	NA	0.005961252	4
YOL013W-A	YOL013W-A	chrXV	301047	301238	+	HT	980	41	192	35763	24671	60434	NA	NA	NA	NA	NA	NA	NA	NA	NA	NA	NA	NA	NA	NA	6.781633333	3	NA	NA	3.329061557	0.207719484	0.136904206	NA	NA	NA	Lethal	NA	1.02949	1.0262	NA	NA	159.9	N	40	6	0.006122449	4	243	94	203	134	171	-169	NO	OPN	301047	NA	0.066091954	0.000127064	3.31E-05	0.000247921	0.00095376	NA	NA	0.023560209	4.5
YDL245C	HXT15	chrIV	11657	13360	-	HH	2844	31	1704	32058	18651	50709	0	NO	SAGA/TFIID	NA	NA	NA	NA	NA	NA	NA	NA	NA	NA	NA	0.286414369	13	NA	NA	2.136544982	0.509674365	0.334144529	NA	NA	NA	NA	NA	NA	NA	6	NA	208.2	NA	NA	16	0.005625879	4	64	96	NA	NA	254	-340	YES	UNCLEAR	11657	0.42821	NA	0.000114384	0.000125554	4.12E-05	0.00052391	3	NA	0.002642396	4.5
YJL219W	HXT9	chrX	19497	21200	+	HH	961	46	1704	48396	21397	69793	0	NO	TFIID	NA	NA	NA	NA	NA	NA	NA	NA	NA	NA	NA	0.907400991	16	NA	NA	1.29601458	0.14098492	0.289718644	NA	NA	NA	NA	NA	NA	NA	NA	NA	204.1	NA	-218	6	0.006243496	5	181	39	40	135	175	-253	NO	OPN	19497	0.46866	NA	0.000108639	0.000129099	6.20E-05	0.000224319	3	NA	0.002642396	4.5
YGL033W	HOP2	chrVII	435625	436351	+	HH	2563	23	657	34830	12585	47415	0	NO	NA	NA	NA	NA	-0.291925466	0.617101281	NA	NA	NA	NA	NA	NA	NA	1	NA	NA	3.206588399	0.151861115	0.121529042	NA	NA	NA	Lethal	NA	0.99537	NA	NA	NA	118.2	N	NA	12	0.004682013	4	154	8	NA	NA	197	-245	NO	OPN	435625	0.3847	0.063218391	0.000812837	0.000231809	0.001513204	2.14E-05	1	NA	0.006198347	4.5
YML100W-A	YML100W-A	chrXIII	70138	70311	+	HH	50	18	174	18189	5894	24083	NA	NA	TFIID	NA	NA	NA	NA	NA	NA	NA	NA	NA	NA	NA	0.21125	2	NA	NA	3.845272075	0.204643397	0.117644545	NA	NA	NA	Lethal	NA	0.98373	0.99047	NA	2	117.5	N	-10	0	0	1	1227	407	1237	397	NA	NA	NA	NA	70138	0.3537	0.011494253	0.000150825	0.000928942	9.97E-05	0.000735569	3	NA	0.026011561	4.5
YIL057C	RGI2	chrIX	247902	248396	-	HH	1595	49	495	51258	23595	74853	1	YES	NA	NA	NA	NA	-4.428571429	0.023273665	NA	NA	NA	NA	NA	NA	1.0952	2	NA	NA	4.344678757	0.318586435	0.129914005	NA	NA	NA	Lethal	NA	1.0065	0.99737	NA	13	118.9	Y	2	3	0.001880878	3	32	85	30	87	162	-160	NO	OPN	191492	4.8621	0.043103448	NA	NA	NA	0.000710019	1	NA	0.009109312	4.5
YFR012W-A	YFR012W-A	chrVI	169224	169310	+	HT	728	1	87	0	0	0	NA	NA	NA	NA	NA	NA	NA	NA	NA	NA	NA	NA	NA	NA	0.952852215	11	NA	NA	4.370116859	0.646227239	0.18394991	NA	NA	NA	Lethal	NA	NA	NA	NA	2	108.4	N	NA	5	0.006868132	4	251	12	NA	NA	190	-418	NA	NA	100851	NA	NA	NA	NA	NA	7.63E-05	NA	NA	0.052325581	4.5
YOR183W	FYV12	chrXV	678872	679261	+	HH	79	24	390	30090	11468	41558	NA	NA	NA	TATA-containing	0	TAF1-depleted	NA	NA	NA	NA	NA	NA	NA	NA	0.148690247	14	NA	NA	3.035162916	0.155575458	0.129953666	NA	NA	NA	Lethal	NA	0.82358	0.96264	NA	NA	167.8	N	-22	0	0	4	85	91	107	69	200	-166	NO	OPN	412030	0.21323	0.011494253	NA	NA	NA	1.43E-05	2	NA	0.011568123	4.5
YJR005C-A	YJR005C-A	chrX	448477	448758	-	HH	444	2	282	0	0	0	NA	NA	NA	NA	NA	NA	NA	NA	NA	NA	NA	NA	NA	NA	NA	NA	NA	NA	3.993886131	0.977885484	0.247598678	NA	NA	NA	Lethal	NA	NA	NA	NA	NA	231	N	-172	3	0.006756757	4	159	21	1	115	167	-362	NO	OPN	296993	NA	NA	0.002545248	0.000866602	0.153640384	NA	NA	NA	0.017793594	5
YFL059W	SNZ3	chrVI	11363	12259	+	HH	394	54	897	51087	22112	73199	0	NO	SAGA/TFIID	NA	NA	NA	NA	NA	NA	NA	NA	NA	NA	NA	3.741687206	12	NA	NA	2.811050562	2.578712983	0.571258725	NA	NA	NA	NA	NA	NA	NA	NA	NA	119.1	NA	-70	1	0.002538071	3	45	356	115	286	401	-30	YES	DPN	11363	0.66671	NA	0.000459783	0.000874279	1.20E-05	0.000495862	2	NA	0.005580357	5
YIL046W-A	YIL046W-A	chrIX	268309	268473	+	HH	486	9	165	8793	4890	13683	NA	NA	NA	NA	NA	NA	NA	NA	NA	NA	NA	NA	NA	NA	NA	NA	NA	NA	4.140081272	0.146005588	0.092294511	NA	NA	NA	Lethal	NA	NA	NA	NA	1	198.1	N	-193	1	0.002057613	3	59	96	97	310	407	-171	YES	UNCLEAR	171415	NA	NA	NA	NA	NA	NA	NA	NA	0.030487805	5
YMR315W-A	YMR315W-A	chrXIII	904286	904393	+	HT	437	3	108	5580	2647	8227	NA	NA	NA	NA	NA	NA	NA	NA	NA	NA	NA	NA	NA	NA	NA	NA	NA	NA	4.026641772	0.667534779	0.202905563	NA	NA	NA	Lethal	NA	NA	NA	NA	NA	169.2	N	NA	2	0.004576659	4	34	125	NA	NA	239	-200	YES	UNCLEAR	20038	NA	NA	NA	NA	NA	NA	NA	NA	0.046728972	5
YNL318C	HXT14;HXT9	chrXIV	38707	40329	-	HH	290	66	1623	56979	25114	82093	0	NO	NA	NA	NA	NA	-1.026600985	0.053821711	NA	NA	NA	NA	NA	NA	NA	NA	NA	NA	2.454508762	0.118721162	0.14037814	NA	NA	NA	Lethal	NA	1.00594	NA	NA	NA	123.3	Y	NA	1	0.003448276	3	126	45	NA	NA	272	-120	YES	DPN	38707	0.3406	0.074712644	NA	NA	NA	1.86E-06	1	NA	0.003082614	5
YMR244W	YMR244W;YM9408.06	chrXIII	757250	758317	+	HH	1084	26	1068	38142	12201	50343	1	YES	NA	NA	NA	NA	-1.413793103	0.033163615	NA	NA	NA	NA	NA	NA	0.815094444	10	NA	NA	3.413715035	0.195893762	0.12965314	NA	NA	NA	Lethal	NA	1.00341	0.99167	NA	NA	267.2	Y	NA	6	0.005535055	4	211	29	NA	NA	179	-104	NO	OPN	166114	0.35593	0.083333333	0.000213819	9.08E-05	0.000275246	0.000525339	1	NA	0.005154639	5.5
YGR292W	MAL12;MAL1S	chrVII	1076599	1078353	+	HH	786	32	1755	47292	20788	68080	2	YES	TFIID	NA	NA	NA	NA	NA	NA	NA	NA	NA	NA	NA	1.102112669	11	NA	NA	1.141586517	1.10002159	0.918738199	NA	NA	NA	Lethal	NA	1.01718	NA	NA	10	160.4	Y	-205	3	0.003816794	3	1	169	36	285	321	-244	YES	UNCLEAR	12587	0.66679	0.014367816	0.000218751	9.17E-05	0.00025038	8.55E-06	3	NA	0.00313569	5.5
YNL269W	BSC4	chrXIV	137699	138094	+	HH	38	18	396	25266	10307	35573	NA	NA	NA	NA	NA	NA	NA	NA	NA	NA	NA	NA	NA	NA	0.61388	5	NA	NA	3.836515515	0.111535859	0.087050306	NA	NA	NA	Lethal	NA	1.01811	0.99707	NA	1	128	N	NA	1	0.026315789	4	146	33	NA	NA	185	-286	NO	OPN	137699	0.3818	0.040229885	0.000459827	9.30E-05	0.00033888	0.000223516	3	NA	0.013924051	5.5
YBR299W	MAL32;MAL3S	chrII	805351	807105	+	HH	95	35	1755	37797	17950	55747	1	YES	NA	NA	NA	NA	NA	NA	NA	NA	NA	NA	NA	NA	0.982562148	15	NA	NA	2.51957583	0.652044255	0.320487506	NA	NA	NA	Lethal	NA	1.04072	NA	NA	8	197.9	Y	-210	1	0.010526316	4	141	31	28	135	163	-257	NO	OPN	6079	0.46484	0	0.000289601	0.000220351	0.000461198	5.60E-06	3	NA	0.00313569	5.5
YBL071C-B	YBL071C-B	chrII	89458	89556	-	HH	422	6	99	6852	2301	9153	NA	NA	NA	NA	NA	NA	NA	NA	NA	NA	NA	NA	NA	NA	NA	NA	NA	NA	5.262258773	0.13782378	0.07054884	NA	NA	NA	Lethal	NA	NA	NA	NA	NA	214	N	NA	2	0.004739336	3	145	258	NA	NA	169	-488	NA	NA	89458	NA	NA	0.001602674	0.001780654	0.003907828	NA	NA	NA	0.056122449	5.5
YGR087C	PDC6	chrVII	651290	652981	-	HH	1653	53	1692	46815	20402	67217	2	YES	SAGA	NA	NA	NA	NA	NA	G+E	40.52592	0	6.994266	2.968444	0.008544331	1.255058161	14	NA	NA	5.383240646	0.302856781	0.102229175	NA	NA	NA	Lethal	NA	1.0133	NA	NA	2	147.4	Y	-294	6	0.003629764	4	120	38	85	123	208	-284	UNCLEAR	UNCLEAR	437959	0.83383	0.017241379	NA	NA	NA	3.81E-05	1	NA	0.003252513	5.5
YGL006W-A	YGL006W-A	chrVII	485423	485533	+	HH	2396	17	111	16530	7747	24277	NA	NA	NA	NA	NA	NA	NA	NA	NA	NA	NA	NA	NA	NA	NA	NA	NA	NA	4.863832536	0.139068934	0.076671939	NA	NA	NA	Lethal	NA	NA	NA	NA	NA	91.5	N	NA	9	0.00375626	4	93	263	NA	NA	356	18	YES	DPN	485423	NA	NA	3.82E-05	3.52E-05	5.25E-06	NA	NA	NA	0.054545455	6
YMR158C-A	YMR158C-A	chrXIII	573194	573331	-	HT	1145	2	138	3672	1636	5308	NA	NA	NA	NA	NA	NA	NA	NA	NA	NA	NA	NA	NA	NA	NA	NA	NA	NA	5.732326578	0.07544316	0.04791583	NA	NA	NA	NA	NA	NA	NA	NA	NA	70.1	NA	NA	7	0.006113537	4	61	121	NA	NA	191	-196	NO	OPN	351100	NA	NA	2.24E-05	0.00013742	0.000234816	NA	NA	NA	0.04379562	6
YAR064W	YAR064W	chrI	221876	222175	+	HT	12182	48	300	45435	19112	64547	2	YES	SAGA/TFIID	NA	NA	NA	NA	NA	NA	NA	NA	NA	NA	NA	0.437641926	17	3.035	0.002575	NA	NA	NA	NA	NA	NA	NA	NA	NA	NA	NA	NA	99	NA	NA	62	0.005089476	5	66	74	NA	NA	164	-297	NO	OPN	8043	0.18064	NA	NA	NA	NA	9.47E-05	2	NA	0.02006689	6
YBR040W	FIG1	chrII	316968	317864	+	HT	458	41	897	51147	32502	83649	3	YES	NA	NA	NA	NA	-5.413636364	3.67E-05	NA	NA	NA	NA	NA	NA	0.350225	4	NA	NA	3.318902375	0.164445763	0.122184711	NA	NA	NA	Lethal	NA	1.02773	NA	NA	NA	203.3	N	-182	2	0.004366812	4	66	116	66	188	254	-191	YES	UNCLEAR	316968	0.63406	0.123563218	NA	NA	NA	2.38E-05	1	NA	0.006696429	6
YBR221W-A	YBR221W-A	chrII	666538	666642	+	HH	285	0	105	0	0	0	NA	NA	NA	NA	NA	NA	NA	NA	NA	NA	NA	NA	NA	NA	NA	NA	NA	NA	NA	NA	NA	NA	NA	NA	Lethal	NA	NA	NA	NA	NA	202.3	N	NA	2	0.007017544	3	182	102	NA	NA	178	-177	NO	OPN	146542	NA	NA	NA	NA	NA	NA	NA	NA	0.057692308	6
YPL038W-A	YPL038W-A	chrXVI	480182	480373	+	HT	7	0	192	0	0	0	NA	NA	NA	NA	NA	NA	NA	NA	NA	NA	NA	NA	NA	NA	NA	NA	NA	NA	5.456237509	0.098629083	0.057558469	NA	NA	NA	Lethal	NA	NA	NA	NA	NA	283.2	N	NA	0	0	3	140	25	NA	NA	153	-100	NO	OPN	467693	NA	NA	1.06E-05	4.23E-06	6.87E-06	NA	NA	NA	0.034031414	6.5
YFL067W	YFL067W	chrVI	836	1363	+	HT	301	64	528	63348	23446	86794	0	NA	TFIID	NA	NA	NA	NA	NA	G+E	40.52592	0	6.994266	2.968444	0.008544331	0.60964882	10	NA	NA	NA	NA	NA	NA	NA	NA	NA	NA	NA	NA	NA	NA	141.9	NA	NA	2	0.006644518	3	194	120	NA	NA	168	-195	NO	OPN	836	0.55067	NA	5.75E-05	0.000233905	0.000202606	4.47E-05	1	NA	0.012333966	6.5
YNL333W	SNZ2	chrXIV	13267	14163	+	HH	391	57	897	54432	22879	77311	2	YES	SAGA/TFIID	NA	NA	NA	NA	NA	NA	NA	NA	NA	NA	NA	3.540091015	15	NA	NA	2.80299467	2.057935548	0.511792141	NA	NA	NA	Lethal	NA	1.00866	NA	NA	NA	148.6	Y	-68	2	0.00511509	4	71	109	139	41	234	-184	YES	UNCLEAR	13267	0.71252	0.074712644	0.000480481	0.000843647	1.16E-05	0.000224194	1	NA	0.007254464	6.5
YAL065C	YAL065C	chrI	11565	11951	-	HH	95	28	387	24027	6849	30876	0	NO	TFIID	NA	NA	NA	NA	NA	G+E	40.52592	0	6.994266	2.968444	0.008544331	0.026958513	14	NA	NA	3.284436757	1.064853239	0.314183935	NA	NA	NA	Lethal	NA	0.99329	0.98331	NA	NA	118.7	Y	NA	1	0.010526316	5	92	68	NA	NA	183	-295	NO	OPN	11565	0.43007	0.060344828	5.88E-05	6.77E-05	3.56E-05	1.46E-05	2	NA	0.018134715	7
YCL048W	SPS22	chrIII	42165	43556	+	HT	438	33	1392	30804	11773	42577	1	YES	NA	NA	NA	NA	-1.408602151	0.035166011	NA	NA	NA	NA	NA	NA	0.386454861	9	NA	NA	2.702254649	0.094766762	0.113920465	NA	NA	NA	Lethal	NA	1.01534	0.99186	40	NA	199.6	Y	NA	2	0.00456621	3	108	57	NA	NA	224	-132	UNCLEAR	UNCLEAR	42165	0.34132	0.034482759	8.52E-05	0.000154884	8.20E-05	9.24E-05	1	NA	0.005032351	7
YGL258W-A	YGL258W-A	chrVII	9162	9395	+	HT	195	8	234	10080	5269	15349	NA	NA	NA	NA	NA	NA	NA	NA	NA	NA	NA	NA	NA	NA	0.557805952	7	NA	NA	4.070764105	0.80129105	0.219896952	NA	NA	NA	NA	NA	NA	NA	NA	NA	95.7	NA	NA	1	0.005128205	4	2	129	NA	NA	289	-360	YES	UNCLEAR	9162	NA	NA	NA	NA	NA	0.000237389	NA	NA	0.030042918	7
YGR174W-A	YGR174W-A	chrVII	846655	846741	+	HH	250	5	87	6042	2127	8169	NA	NA	NA	NA	NA	NA	NA	NA	NA	NA	NA	NA	NA	NA	NA	NA	NA	NA	6.414278824	0.197975237	0.069367749	NA	NA	NA	Lethal	NA	NA	NA	NA	7	179	N	-124	1	0.004	4	79	83	41	210	251	-158	YES	UNCLEAR	244199	NA	NA	NA	NA	NA	NA	NA	NA	0.081395349	7
YLR412C-A	YLR412C-A	chrXII	950267	950473	-	HH	683	8	207	6114	3061	9175	NA	NA	NA	TATA-less	2	TAF1-enriched	NA	NA	NA	NA	NA	NA	NA	NA	NA	NA	NA	NA	3.853160452	0.095222586	0.080085316	NA	NA	NA	Lethal	NA	NA	NA	NA	1	282.3	N	-185	3	0.004392387	4	58	106	79	126	280	-386	YES	UNCLEAR	127704	NA	NA	NA	NA	NA	NA	NA	NA	0.033980583	7
YOL157C	IMA2	chrXV	22525	24294	-	HH	979	55	1770	57987	21593	79580	2	YES	TFIID	NA	NA	NA	NA	NA	NA	NA	NA	NA	NA	NA	0.726912604	15	NA	NA	1.813792385	0.363037261	0.332191126	NA	NA	NA	NA	NA	NA	NA	NA	NA	185.6	NA	-42	7	0.007150153	5	58	85	100	43	161	-278	NO	OPN	22525	0.59676	NA	NA	NA	NA	7.44E-05	3	NA	0.003957038	7
YPR202W	YPR202W;P9677.1	chrXVI	943032	943896	+	HT	1896	27	717	28572	15343	43915	0	NO	TFIID	TATA-less	1	TAF1-enriched	NA	NA	NA	NA	NA	NA	NA	NA	1.443270392	16	NA	NA	NA	NA	NA	NA	NA	NA	NA	NA	NA	NA	NA	NA	NA	NA	-265	9	0.004746835	2	NA	389	NA	124	141	-464	NA	NA	4170	0.30336	NA	NA	NA	NA	5.90E-05	2	NA	0.008101852	7
YOR186W	YOR186W	chrXV	683111	683545	+	HH	1005	28	435	29190	16058	45248	0	NO	NA	NA	NA	NA	-0.05	0.938131546	G+E	40.52592	0	6.994266	2.968444	0.008544331	0.818825	4	NA	NA	4.825860834	0.155136712	0.081617352	NA	NA	NA	Lethal	NA	1.02544	NA	NA	3	145.4	N	NA	5	0.004975124	4	72	75	NA	NA	186	-296	NO	OPN	407746	1.8456	0	2.36E-05	1.69E-05	3.59E-06	0.00035943	1	NA	0.017281106	7.5
YMR017W	SPO20	chrXIII	307489	308682	+	HH	1896	77	1194	82452	33894	116346	0	NO	NA	NA	NA	NA	-1.166255144	0.025955053	NA	NA	NA	NA	NA	NA	2.899784034	8	NA	NA	3.448055627	0.064658082	0.073745775	NA	NA	NA	Lethal	NA	1.02231	NA	NA	NA	104.1	Y	NA	6	0.003164557	4	66	86	NA	NA	208	-345	UNCLEAR	UNCLEAR	307489	0.74956	0.051724138	0.000252951	4.36E-05	0.000836043	0.000624247	2	NA	0.006286672	7.5
YDR218C	SPR28	chrIV	903781	905052	-	HT	403	21	1272	34365	9540	43905	0	NO	TFIID	NA	NA	NA	-3.109126984	0.000470443	NA	NA	NA	NA	NA	NA	0.869091667	4	NA	NA	3.154379137	0.207864753	0.144536168	NA	NA	NA	Lethal	NA	0.99977	NA	NA	NA	112.3	Y	-10	2	0.004962779	4	29	120	39	110	218	-326	UNCLEAR	UNCLEAR	626881	0.51136	0.002873563	0.000419771	0.000146651	0.001093896	0.000992825	2	NA	0.005900865	7.5
YPL027W	SMA1	chrXVI	499665	500402	+	HT	373	21	738	30699	11583	42282	0	NO	NA	NA	NA	NA	-0.047496791	0.906693772	NA	NA	NA	NA	NA	NA	0.120871501	15	NA	NA	2.746575797	0.063000416	0.091386095	NA	NA	NA	Lethal	NA	1.01921	1.00039	NA	1	247.5	N	NA	2	0.00536193	4	38	105	NA	NA	246	-180	YES	UNCLEAR	447664	0.43737	0.068965517	0.000298989	0.000193206	0.000566135	1.52E-05	2	NA	0.010176391	7.5
YGL230C	YGL230C	chrVII	63772	64215	-	HT	288	29	444	36744	10134	46878	0	NO	TFIID	NA	NA	NA	-0.333333333	0.634157093	NA	NA	NA	NA	NA	NA	0.167213327	16	NA	NA	3.669661768	0.15989842	0.108967265	NA	NA	NA	Lethal	NA	1.0009	1.02059	NA	2	116.8	N	-70	1	0.003472222	4	82	86	152	16	243	-161	YES	UNCLEAR	63772	0.25837	0.022988506	NA	NA	NA	3.46E-05	3	NA	0.016930023	7.5
YGL007C-A	YGL007C-A	chrVII	482941	483027	-	HH	2396	22	87	21429	8851	30280	NA	NA	NA	NA	NA	NA	NA	NA	NA	NA	NA	NA	NA	NA	NA	NA	NA	NA	4.763677925	0.201393237	0.094206322	NA	NA	NA	Lethal	NA	NA	NA	NA	6	89.6	N	-155	9	0.00375626	4	61	84	71	263	334	-159	YES	UNCLEAR	482941	NA	NA	NA	NA	NA	NA	NA	NA	0.087209302	7.5
YGR236C	SPG1	chrVII	962530	962817	-	HT	481	27	288	31326	14551	45877	3	YES	NA	NA	NA	NA	-1.916666667	0.167715502	NA	NA	NA	NA	NA	NA	0.404044576	17	1.07	0.417128	4.939463337	0.266307324	0.104474858	NA	NA	NA	Lethal	NA	1.02174	NA	NA	2	108.6	N	NA	3	0.006237006	4	116	94	NA	NA	185	-169	NO	OPN	128123	3.2422	0	NA	NA	NA	1.78E-05	3	NA	0.026132404	7.5
YLL046C	RNP1	chrXII	46714	47463	-	HT	396	28	750	28848	12285	41133	1	YES	NA	NA	NA	NA	-0.247401247	0.627659886	NA	NA	NA	NA	NA	NA	1.181420238	7	NA	NA	3.553536884	0.119104877	0.097118943	NA	NA	NA	Lethal	NA	0.99862	NA	31	NA	265.1	N	NA	2	0.005050505	4	89	83	NA	NA	224	-158	UNCLEAR	UNCLEAR	46714	0.29981	0.074712644	NA	NA	NA	0.00070044	2	NA	0.010013351	7.5
YAL064W-B	YAL064W-B	chrI	12046	12426	+	HH	95	16	381	9729	4103	13832	NA	NA	NA	NA	NA	NA	NA	NA	NA	NA	NA	NA	NA	NA	0.159000644	17	2.814	0.004568	NA	NA	NA	NA	NA	NA	NA	NA	NA	NA	NA	NA	200.6	NA	NA	1	0.010526316	4	125	27	NA	NA	192	-410	NA	NA	12046	0.51283	NA	7.69E-05	9.17E-05	2.87E-05	0.000430407	NA	NA	0.021052632	8
YOL163W	YOL163W;O0230	chrXV	9597	10106	+	HT	1482	34	510	43077	13695	56772	0	NO	TFIID	NA	NA	NA	NA	NA	NA	NA	NA	NA	NA	NA	1.420478585	9	NA	NA	2.689458345	0.628038935	0.294664938	NA	NA	NA	Lethal	NA	0.99889	0.97407	NA	2	177.1	Y	-303	9	0.006072874	4	73	70	84	133	217	-294	UNCLEAR	UNCLEAR	9597	0.59367	0.022988506	0.00024147	0.000105493	0.000274888	2.19E-05	3	NA	0.015717092	8
YLL006W-A	YLL006W-A	chrXII	136345	136521	+	HH	46	3	177	1944	754	2698	NA	NA	NA	NA	NA	NA	NA	NA	NA	NA	NA	NA	NA	NA	NA	NA	NA	NA	NA	NA	NA	NA	NA	NA	Lethal	NA	NA	NA	NA	NA	333.2	N	NA	1	0.02173913	4	228	19	NA	NA	180	-431	NA	NA	136345	NA	NA	NA	NA	NA	NA	NA	NA	0.045454545	8
YPL121C	MEI5	chrXVI	320962	321630	-	HH	441	20	669	16674	7157	23831	0	NO	NA	NA	NA	NA	-0.5	0.548864618	NA	NA	NA	NA	NA	NA	0.05085252	17	1.29	0.262393	2.339806298	0.048036212	0.093670852	NA	NA	NA	Lethal	NA	1.00855	NA	NA	NA	217.4	N	-183	3	0.006802721	4	131	45	138	3	171	-261	NO	OPN	320962	0.36274	0.066091954	0.000403172	4.42E-05	0.000374109	2.47E-05	2	NA	0.012724551	8.5
YNL019C	YNL019C;N2827	chrXIV	598376	599230	-	HT	706	22	855	33072	11686	44758	0	NO	SAGA/TFIID	NA	NA	NA	NA	NA	NA	NA	NA	NA	NA	NA	0.8400375	5	NA	NA	1.912544334	0.383613626	0.323843736	NA	NA	NA	NA	NA	NA	NA	NA	NA	217.4	NA	-189	4	0.005665722	4	53	94	95	70	178	-334	NO	OPN	185103	0.32545	NA	1.83E-05	6.97E-05	3.77E-05	0.00011827	3	NA	0.009953162	8.5
YJL027C	YJL027C;J1269	chrX	391833	392249	-	HH	155	22	417	23613	9223	32836	0	NO	NA	NA	NA	NA	NA	1	NA	NA	NA	NA	NA	NA	0.358851285	15	NA	NA	2.892216353	0.028204073	0.058066432	NA	NA	NA	Lethal	NA	1.02994	1.00284	NA	1	328.6	N	NA	1	0.006451613	3	237	135	NA	NA	242	-210	YES	UNCLEAR	353502	0.62145	0.034482759	0.000202315	0.0001267	0.000169535	5.89E-05	1	NA	0.020432692	8.5
YNL130C-A	DGR1	chrXIV	381245	381391	-	HH	89	3	147	2892	888	3780	NA	NA	NA	NA	NA	NA	NA	NA	NA	NA	NA	NA	NA	NA	NA	NA	NA	NA	NA	NA	NA	NA	NA	NA	Lethal	NA	NA	NA	NA	1	176.9	N	NA	1	0.011235955	4	130	60	NA	NA	182	-135	NO	OPN	381245	NA	NA	0.00017063	0.000143897	0.000370739	NA	NA	NA	0.058219178	8.5
YER106W	MAM1	chrV	372326	373234	+	HH	313	20	909	21189	7608	28797	0	NO	TFIID	NA	NA	NA	-1.183098592	0.188056101	NA	NA	NA	NA	NA	NA	0.053321745	16	NA	NA	3.193104728	0.052489427	0.07175014	NA	NA	NA	Lethal	NA	1.01565	0.95925	NA	NA	219.5	N	NA	1	0.003194888	3	148	61	NA	NA	259	-136	YES	DPN	203640	0.26162	0.031609195	0.000183711	0.000229661	0.000298867	7.26E-06	2	NA	0.009361233	8.5
YCL026C-A	FRM2	chrIII	74704	75285	-	HT	733	31	582	32244	12129	44373	NA	NA	NA	NA	NA	NA	NA	NA	NA	NA	NA	NA	NA	NA	2.144159602	14	NA	NA	3.283820826	0.57709888	0.2313373	NA	NA	NA	Lethal	NA	1.01374	NA	NA	2	190.9	Y	-102	3	0.004092769	4	93	140	195	38	233	18	YES	DPN	74704	0.76869	0.066091954	0.001145705	1.47E-05	0.000243084	9.93E-05	NA	NA	0.015490534	9
YFR023W	PES4	chrVI	199874	201709	+	HT	840	30	1836	35403	16839	52242	0	NO	NA	NA	NA	NA	-6.696969697	0.000595556	NA	NA	NA	NA	NA	NA	0.6129	5	NA	NA	2.671424434	0.141643765	0.140882107	NA	NA	NA	Lethal	NA	0.99565	NA	NA	NA	94.8	Y	NA	4	0.004761905	4	13	159	NA	NA	181	-400	NO	OPN	68452	0.32103	0.17816092	0.00014131	5.96E-05	0.000545439	5.21E-06	1	NA	0.004904632	9
YEL049W	PAU2	chrV	63728	64090	+	HH	2877	27	363	30282	10838	41120	0	NO	TFIID	NA	NA	NA	NA	NA	G+E	40.52592	0	6.994266	2.968444	0.008544331	0.200804377	16	NA	NA	4.198566111	0.188713593	0.1034667	NA	NA	NA	Lethal	NA	1.00943	NA	NA	2	131	Y	-300	15	0.005213764	4	3	170	130	3	233	-378	YES	UNCLEAR	63728	0.44862	0.045977011	0.000136106	0.000123717	0.000207604	0.000110932	1	NA	0.024861878	9
YOR316C-A	YOR316C-A	chrXV	907726	907935	-	HH	1408	8	210	6591	3272	9863	NA	NA	NA	TATA-containing	0	TAF1-enriched	NA	NA	NA	NA	NA	NA	NA	NA	NA	NA	NA	NA	5.082879711	0.135246864	0.072352538	NA	NA	NA	Lethal	NA	NA	NA	NA	3	204.4	N	NA	6	0.004261364	4	106	38	NA	NA	239	-113	YES	DPN	183356	NA	NA	0.001255579	0.000554062	0.000292281	NA	NA	NA	0.043062201	9
YNR075C-A	YNR075C-A	chrXIV	781511	781603	-	HH	315	3	93	2067	558	2625	NA	NA	NA	NA	NA	NA	NA	NA	NA	NA	NA	NA	NA	NA	NA	NA	NA	NA	NA	NA	NA	NA	NA	NA	NA	NA	NA	NA	NA	NA	250.9	NA	NA	2	0.006349206	5	36	94	NA	NA	170	-331	NO	OPN	2730	NA	NA	NA	NA	NA	NA	NA	NA	0.097826087	9
YDL159W-A	YDL159W-A;YDL159W-B	chrIV	172182	172313	+	HH	252	7	132	6618	2224	8842	NA	NA	NA	NA	NA	NA	NA	NA	NA	NA	NA	NA	NA	NA	0.169092198	17	1.672	0.091154	NA	NA	NA	NA	NA	NA	Lethal	NA	NA	NA	NA	NA	196.6	N	NA	2	0.007936508	4	289	39	NA	NA	189	-262	NO	OPN	172182	NA	NA	5.29E-06	1.06E-05	7.75E-05	0.003141468	NA	NA	0.072519084	9.5
YDR182W-A	YDR182W-A;smORF121;SR1	chrIV	829151	829354	+	HT	94	4	204	4041	1750	5791	NA	NA	NA	NA	NA	NA	NA	NA	NA	NA	NA	NA	NA	NA	NA	NA	NA	NA	5.219970357	0.088177651	0.056886763	NA	NA	NA	Lethal	NA	NA	NA	NA	1	153.4	N	NA	0	0	4	31	145	NA	NA	176	-44	NO	OPN	702579	NA	NA	9.82E-05	7.02E-05	0.000100702	NA	NA	NA	0.04679803	9.5
YBL008W-A	YBL008W-A	chrII	209409	209648	+	HT	185	0	240	0	0	0	NA	NA	NA	NA	NA	NA	NA	NA	NA	NA	NA	NA	NA	NA	NA	NA	NA	NA	4.13380042	0.088791387	0.072083508	NA	NA	NA	Lethal	NA	NA	NA	NA	NA	286	N	NA	2	0.010810811	4	202	5	NA	NA	198	-253	NO	OPN	209409	NA	NA	0.000125754	0.000189417	0.000117887	NA	NA	NA	0.039748954	9.5
YFR032C	RRT5	chrVI	222090	222959	-	HT	299	27	870	25656	10130	35786	0	NO	NA	NA	NA	NA	-2.088235294	0.010952688	NA	NA	NA	NA	NA	NA	0.271401818	11	NA	NA	2.851604786	0.066435558	0.090388038	NA	NA	NA	Lethal	NA	1.0013	1.03193	NA	NA	90.9	N	NA	2	0.006688963	3	129	34	NA	NA	233	-109	YES	DPN	47202	0.32584	0.031609195	NA	NA	NA	0.000127167	1	NA	0.010932106	9.5
YKL065W-A	YKL065W-A	chrXI	315954	316175	+	HT	681	0	222	0	0	0	NA	NA	NA	NA	NA	NA	-0.619047619	0.639711206	NA	NA	NA	NA	NA	NA	NA	NA	NA	NA	5.778785972	0.131298316	0.062703671	NA	NA	NA	NA	NA	NA	NA	NA	NA	147.1	NA	35	3	0.004405286	3	104	87	69	122	180	-310	NO	OPN	315954	NA	NA	NA	NA	NA	NA	NA	NA	0.042986425	9.5
YMR242W-A	YMR242W-A	chrXIII	754297	754386	+	HH	77	4	90	2811	551	3362	NA	NA	NA	NA	NA	NA	NA	NA	NA	NA	NA	NA	NA	NA	NA	NA	NA	NA	NA	NA	NA	NA	NA	NA	Lethal	NA	NA	NA	NA	NA	245.3	N	NA	0	0	3	425	92	NA	NA	170	NA	NA	NA	170045	NA	NA	NA	NA	NA	NA	NA	NA	0.106741573	9.5
YPR151C	SUE1	chrXVI	831055	831675	-	HT	386	33	621	33204	15381	48585	0	NO	TFIID	NA	NA	NA	-0.111111111	0.873102229	NA	NA	NA	NA	NA	NA	1.586945192	13	NA	NA	7.375975085	0.031302064	0.023986509	NA	NA	NA	Lethal	NA	1.00855	1.01509	37	5	319.3	N	NA	2	0.005181347	4	35	137	NA	NA	277	-359	YES	UNCLEAR	116391	2.686	0.040229885	NA	NA	NA	6.56E-05	1	NA	0.015322581	9.5
YMR247W-A	YMR247W-A	chrXIII	769283	769426	+	HH	1244	3	144	4182	1552	5734	NA	NA	NA	NA	NA	NA	NA	NA	NA	NA	NA	NA	NA	NA	NA	NA	NA	NA	NA	NA	NA	NA	NA	NA	Lethal	NA	NA	NA	NA	NA	225.8	N	NA	7	0.00562701	4	7	191	NA	NA	198	-68	NO	OPN	155005	NA	NA	2.00E-05	0.000228304	0.000215277	NA	NA	NA	0.06993007	10
YDR246W-A	YDR246W-A;smORF127	chrIV	955133	955333	+	HT	186	7	201	5445	3176	8621	NA	NA	NA	NA	NA	NA	NA	NA	NA	NA	NA	NA	NA	NA	NA	NA	NA	NA	4.159173166	0.204469953	0.108719575	NA	NA	NA	Lethal	NA	NA	NA	NA	NA	100.3	N	NA	0	0	1	790	469	NA	NA	NA	NA	NA	NA	576600	NA	NA	0.000102579	2.59E-05	8.17E-05	NA	NA	NA	0.0525	10.5
YHR157W	REC104	chrVIII	412907	413455	+	HH	501	31	549	35133	14535	49668	0	NO	TFIID	NA	NA	NA	0	1	NA	NA	NA	NA	NA	NA	0.312380331	16	NA	NA	3.896735182	0.092397464	0.078006202	NA	NA	NA	Lethal	NA	1.01694	NA	NA	1	163	N	-284	3	0.005988024	4	48	122	162	2	198	-361	NO	OPN	149188	0.22018	0.034482759	2.63E-05	4.45E-05	2.18E-05	8.51E-05	3	NA	0.019160584	10.5
YKL221W	MCH2	chrXI	6107	7528	+	HH	487	30	1422	35766	16428	52194	1	YES	TFIID	NA	NA	NA	NA	NA	NA	NA	NA	NA	NA	NA	0.535869643	8	NA	NA	3.360010731	0.144435098	0.11310862	NA	NA	NA	Lethal	NA	1.03351	1.03447	NA	NA	262.3	Y	-596	2	0.004106776	4	29	126	16	168	278	-201	YES	UNCLEAR	6107	0.92393	0.022988506	0.000114742	0.000148116	0.000415746	0.000142228	3	NA	0.007389163	10.5
YCR095W-A	YCR095W-A	chrIII	289639	289797	+	HH	381	0	159	0	0	0	NA	NA	NA	TATA-less	1	TAF1-enriched	NA	NA	NA	NA	NA	NA	NA	NA	NA	NA	NA	NA	4.761922665	0.093508301	0.064215925	NA	NA	NA	Lethal	NA	NA	NA	NA	15	233.4	N	-138	1	0.002624672	4	86	129	9	248	257	-204	YES	UNCLEAR	26823	NA	NA	5.26E-05	0.000211284	8.97E-05	NA	NA	NA	0.066455696	10.5
YOR032W-A	YOR032W-A	chrXV	392176	392376	+	HH	1101	14	201	16785	8849	25634	NA	NA	NA	TATA-less	1	TAF1-enriched	NA	NA	NA	NA	NA	NA	NA	NA	NA	NA	NA	NA	5.122007717	0.094760046	0.060099714	NA	NA	NA	NA	NA	NA	NA	NA	NA	160.7	NA	-112	3	0.002724796	2	24	277	136	165	301	-51	YES	DPN	392176	NA	NA	0.000538077	0.00052925	0.000573655	NA	NA	NA	0.0525	10.5
YMR182W-A	YMR182W-A	chrXIII	625811	625897	+	HH	644	5	87	6567	1716	8283	NA	NA	NA	TATA-less	1	TAF1-depleted	NA	NA	NA	NA	NA	NA	NA	NA	NA	NA	NA	NA	6.114573241	0.169134794	0.067258988	NA	NA	NA	Lethal	NA	NA	NA	NA	11	130.7	N	NA	1	0.001552795	2	33	495	NA	NA	528	-42	YES	DPN	298534	NA	NA	NA	NA	NA	NA	NA	NA	0.122093023	10.5
YOL156W	HXT11;LGT3	chrXV	25273	26976	+	HH	979	72	1704	78426	29004	107430	0	NO	TFIID	NA	NA	NA	NA	NA	G+E	40.52592	0	6.994266	2.968444	0.008544331	0.749024271	14	NA	NA	1.23773867	0.266837605	0.417344368	NA	NA	NA	NA	NA	NA	NA	NA	NA	219.2	NA	326	7	0.007150153	4	180	39	30	146	166	-114	NO	OPN	25273	0.39082	NA	NA	NA	NA	5.54E-05	3	NA	0.00616559	10.5
YBL100W-C	YBL100W-C;YBL101W-C	chrII	28427	28546	+	HH	128	1	120	2067	558	2625	NA	NA	NA	TATA-less	1	TAF1-enriched	NA	NA	NA	NA	NA	NA	NA	NA	NA	NA	NA	NA	NA	NA	NA	NA	NA	NA	NA	NA	NA	NA	NA	NA	163.8	NA	NA	1	0.0078125	3	169	79	NA	NA	196	-154	NO	OPN	28427	NA	NA	0.000273696	7.64E-05	0.000148355	NA	NA	NA	0.092436975	11
YKL178C	STE3	chrXI	113215	114627	-	HT	873	64	1413	78711	37979	116690	0	NO	TFIID	NA	NA	NA	-1.450800915	0.012393988	NA	NA	NA	NA	NA	NA	8.747930177	12	NA	NA	4.604300184	1.322910968	0.249805317	NA	NA	NA	Lethal	NA	0	NA	NA	2	153.7	N	561	4	0.004581901	4	83	81	82	303	274	-319	YES	UNCLEAR	113215	0.57102	0.031609195	0.000322447	0.003204236	0.000165598	3.11E-05	2	NA	0.007790368	11
YLL025W	PAU17	chrXII	94747	95121	+	HT	3398	27	375	29727	12541	42268	2	YES	TFIID	NA	NA	NA	-9.5	0.009901177	G+E	40.52592	0	6.994266	2.968444	0.008544331	0.092316355	17	1.781	0.071103	5.32618749	0.089416788	0.056142673	NA	NA	NA	Lethal	NA	0.98058	0.97976	18	2	195.5	Y	-535	21	0.006180106	5	118	38	98	34	147	-235	NO	OPN	94747	0.56838	0.017241379	NA	NA	NA	0.00012153	1	NA	0.029411765	11
YDR446W	ECM11	chrIV	1353725	1354633	+	HT	1372	20	909	24204	11649	35853	0	NO	NA	NA	NA	NA	-0.352657005	0.545971048	NA	NA	NA	NA	NA	NA	1.707447619	7	NA	NA	2.749207501	0.106427524	0.11866413	NA	NA	NA	Lethal	NA	1.01025	NA	NA	NA	115.1	N	-16	5	0.003644315	4	27	248	43	232	275	-48	YES	DPN	177300	0.1647	0.022988506	0.000189248	2.61E-05	0.001085203	3.70E-05	3	NA	0.012665198	11.5
YMR030W-A	YMR030W-A	chrXIII	337313	337603	+	HT	6	2	291	2436	672	3108	NA	NA	NA	NA	NA	NA	NA	NA	NA	NA	NA	NA	NA	NA	NA	NA	NA	NA	5.127793844	0.060512992	0.047972655	NA	NA	NA	NA	NA	NA	NA	NA	NA	120.3	NA	NA	0	0	4	77	94	NA	NA	242	-169	YES	UNCLEAR	337313	NA	NA	0.000310853	5.80E-05	0.000169543	NA	NA	NA	0.039655172	11.5
YER039C-A	YER039C-A	chrV	229263	229481	-	HH	314	13	219	11349	7055	18404	NA	NA	NA	NA	NA	NA	NA	NA	NA	NA	NA	NA	NA	NA	0.289099607	14	NA	NA	6.142718623	0.185380886	0.070092549	NA	NA	NA	Lethal	NA	1.01302	1.04494	NA	1	148.6	Y	-21	1	0.003184713	3	11	264	32	243	275	-64	YES	DPN	229263	NA	0.00862069	0.000217049	7.18E-05	0.000229258	5.41E-05	NA	NA	0.052752294	11.5
YGL015C	YGL015C;YGL026	chrVII	465043	465435	-	HH	706	17	393	18969	8577	27546	3	YES	NA	NA	NA	NA	-0.85625	0.291861313	G+E	40.52592	0	6.994266	2.968444	0.008544331	1.18513	5	NA	NA	3.163447073	0.153045844	0.123665967	NA	NA	NA	Lethal	NA	1.0293	NA	NA	1	141.5	N	NA	5	0.007082153	4	108	52	NA	NA	176	-406	NA	NA	465043	0.26586	0.002873563	0.005554508	0.000120593	0.009456153	2.53E-05	2	NA	0.029336735	11.5
YEL073C	YEL073C	chrV	7230	7553	-	HH	6167	38	324	46206	21262	67468	2	YES	TFIID	NA	NA	NA	NA	NA	G+E	40.52592	0	6.994266	2.968444	0.008544331	1.776576689	14	NA	NA	5.666779033	0.294930234	0.095834828	NA	NA	NA	NA	NA	NA	NA	NA	NA	159.6	NA	NA	36	0.005837522	4	77	72	NA	NA	223	-317	UNCLEAR	UNCLEAR	7230	0.56438	NA	0.000648002	0.0002379	0.000218922	0.000161753	2	NA	0.035603715	11.5
YCL001W-A	YCL001W-A	chrIII	113080	113541	+	HT	598	13	462	13524	6261	19785	NA	NA	NA	NA	NA	NA	NA	1	NA	NA	NA	NA	NA	NA	0.328448803	11	NA	NA	3.306800392	0.078969859	0.084981169	NA	NA	NA	Lethal	NA	1.01075	1.00186	NA	NA	225.2	N	NA	4	0.006688963	4	130	52	NA	NA	186	-127	NO	OPN	113080	NA	0.227011494	2.96E-05	9.87E-06	7.13E-05	2.18E-05	NA	NA	0.026030369	12
YNL034W	YNL034W;N2740	chrXIV	570477	572315	+	HH	786	36	1839	39846	14529	54375	0	NO	TFIID	NA	NA	NA	NA	NA	NA	NA	NA	NA	NA	NA	0.830010975	14	NA	NA	2.467128583	0.348403846	0.239248755	NA	NA	NA	Lethal	NA	1.00651	1.01551	NA	NA	118.7	Y	NA	5	0.006361323	4	123	19	NA	NA	199	-94	NO	OPN	212018	0.45432	0.083333333	3.68E-05	5.81E-05	0.000290508	0.000125392	2	NA	0.006528836	12
YAR020C	PAU7	chrI	176856	177023	-	HT	2258	33	168	32106	14992	47098	2	YES	TFIID	NA	NA	NA	NA	NA	NA	NA	NA	NA	NA	NA	0.480925691	14	NA	NA	4.689744877	0.079853298	0.060255572	NA	NA	NA	Lethal	NA	1.00077	NA	NA	NA	111.9	Y	NA	14	0.006200177	4	100	41	NA	NA	229	-257	YES	UNCLEAR	53195	0.28608	0.106321839	0.000104701	7.78E-05	0.000297213	0.000125545	2	NA	0.071856287	12
YML083C	YML083C	chrXIII	99794	101050	-	HH	812	41	1257	45546	19901	65447	1	YES	NA	NA	NA	NA	-0.239426523	0.533824692	NA	NA	NA	NA	NA	NA	2.1567	3	NA	NA	2.524308889	0.187324257	0.171456721	NA	NA	NA	Lethal	NA	0.97963	0.97942	NA	NA	118.2	N	NA	3	0.003694581	3	59	122	NA	NA	181	-16	NO	OPN	99794	0.73761	0.120689655	0.000120733	5.51E-05	0.000173707	0.000653617	1	NA	0.009952229	12.5
YOR339C	UBC11	chrXV	958362	958832	-	HT	370	30	471	35151	12045	47196	0	NO	SAGA/TFIID	NA	NA	NA	-0.764705882	0.356212232	NA	NA	NA	NA	NA	NA	0.062811892	14	NA	NA	4.483667665	0.174277265	0.09310799	NA	NA	NA	Lethal	NA	0.79242	NA	NA	1	158.9	Y	-36	2	0.005405405	4	112	37	148	1	231	-286	YES	UNCLEAR	132459	0.53333	0.017241379	0.000305905	5.66E-05	8.82E-05	1.30E-05	2	NA	0.026595745	12.5
YMR107W	SPG4	chrXIII	483014	483361	+	HH	2824	52	348	63825	21940	85765	1	YES	SAGA	NA	NA	NA	-4.833333333	0.028122675	G+E	40.52592	0	6.994266	2.968444	0.008544331	2.35445	2	NA	NA	5.994733971	0.575139755	0.126507647	NA	NA	NA	Lethal	NA	1.05112	1.00923	NA	2	118.1	N	-38	15	0.005311615	2	108	17	21	246	267	-92	YES	DPN	441070	3.9248	0.014367816	0.01927454	7.49E-05	0.001561469	0.000225168	1	NA	0.036023055	12.5
YBR250W	SPO23	chrII	719033	720604	+	HH	1039	29	1572	25872	10566	36438	0	NO	TFIID	NA	NA	NA	-0.870286576	0.068732332	NA	NA	NA	NA	NA	NA	0.288846608	16	NA	NA	4.042163969	0.080809159	0.070326073	NA	NA	NA	Lethal	NA	1.03371	1.02479	NA	NA	156.2	N	NA	5	0.00481232	4	138	51	NA	NA	212	-126	UNCLEAR	UNCLEAR	92580	0.37611	0.066091954	0.000244362	4.43E-05	0.000158531	0.000105766	2	NA	0.008274984	13
YKL107W	YKL107W;YKL462	chrXI	236141	237070	+	HT	354	30	930	31884	15360	47244	1	YES	TFIID	NA	NA	NA	-3.7125	0.000978664	NA	NA	NA	NA	NA	NA	0.989440294	17	3.741	0.000492	4.605995088	0.360515164	0.130358183	NA	NA	NA	Lethal	NA	1.02283	1.01313	NA	1	194.4	N	NA	2	0.005649718	4	80	82	NA	NA	178	-157	NO	OPN	236141	1.4643	0.025862069	0.000117689	4.48E-05	0.000220474	0.000137518	2	NA	0.013993541	13
YEL059C-A	SOM1	chrV	42400	42624	-	HH	628	34	225	34827	14451	49278	0	NO	TFIID	NA	NA	NA	-0.428571429	0.656200602	NA	NA	NA	NA	NA	NA	0.339205888	17	1.803	0.071106	6.905940544	0.062781973	0.036282286	NA	NA	NA	Lethal	NA	NA	NA	NA	19	106.2	N	-77	4	0.006369427	4	168	3	74	38	160	-339	NO	OPN	42400	0.63428	NA	4.37E-05	6.62E-05	2.49E-05	0.000389643	1	NA	0.058035714	13
YIR032C	DAL3	chrIX	415030	415617	-	HH	507	29	588	32118	12177	44295	1	YES	SAGA	TATA-less	1	TAF1-enriched	-0.9	0.232395857	G+E	40.52592	0	6.994266	2.968444	0.008544331	1.663315556	10	NA	NA	7.192270903	0.046418419	0.029955677	NA	NA	NA	Lethal	NA	1.01828	NA	NA	15	276.3	N	-65	3	0.00591716	3	130	43	22	124	277	-264	YES	UNCLEAR	24271	1.0465	0.022988506	0.00064271	9.04E-05	0.000320168	6.30E-06	2	NA	0.022146508	13
YHR054C	YHR054C	chrVIII	213185	214249	-	HT	284	30	1065	36840	10978	47818	0	NO	TFIID	NA	NA	NA	NA	NA	G+E	40.52592	0	6.994266	2.968444	0.008544331	0.090522507	14	NA	NA	NA	NA	NA	NA	NA	NA	NA	NA	NA	NA	NA	NA	133.8	NA	NA	2	0.007042254	5	24	152	NA	NA	176	-51	NO	OPN	213185	0.43079	NA	4.34E-05	0.000218221	9.20E-05	0.000299028	3	NA	0.012218045	13
YPR096C	YPR096C;P9513.17C	chrXVI	724842	725144	-	HH	250	12	303	15168	5252	20420	0	NO	TFIID	NA	NA	NA	-7.517241379	0.011919895	NA	NA	NA	NA	NA	NA	0.132529437	14	NA	NA	3.972787815	0.115369254	0.085496763	NA	NA	NA	Lethal	NA	1.01353	1.01959	NA	NA	321.9	N	NA	2	0.008	4	196	56	NA	NA	189	-292	NO	OPN	222922	0.29693	0.031609195	0.00030097	0.000252785	0.000825252	1.35E-05	1	NA	0.043046358	13
YPR193C	HPA2	chrXVI	922909	923379	-	HT	925	16	471	22665	11009	33674	3	YES	NA	NA	NA	NA	-1.816666667	0.064795912	NA	NA	NA	NA	NA	NA	0.263087728	15	NA	NA	6.36895192	0.397129165	0.098945927	NA	NA	NA	Lethal	NA	1.01558	NA	86	6	306.6	Y	-613	6	0.006486486	4	104	58	50	82	177	-300	NO	OPN	24687	0.89459	0.025862069	NA	NA	NA	5.09E-05	1	NA	0.027659574	13
YPR078C	YPR078C	chrXVI	697147	698265	-	HH	604	23	1119	23499	8833	32332	0	NO	TFIID	NA	NA	NA	-0.175438596	0.69764052	G+E	40.52592	0	6.994266	2.968444	0.008544331	NA	1	NA	NA	3.826403744	0.109144735	0.086339713	NA	NA	NA	Lethal	NA	1.03538	1.01413	27	NA	293.1	N	-164	3	0.004966887	4	62	87	77	148	259	-387	YES	UNCLEAR	249801	0.56105	0.028735632	4.47E-05	3.42E-05	3.83E-05	6.58E-05	1	NA	0.012075134	13.5
YOL038C-A	YOL038C-A	chrXV	254926	255021	-	HH	316	6	96	9480	3330	12810	NA	NA	NA	NA	NA	NA	NA	NA	NA	NA	NA	NA	NA	NA	NA	NA	NA	NA	5.287948828	0.171953548	0.078418463	NA	NA	NA	Lethal	NA	NA	NA	NA	9	211.8	N	-73	1	0.003164557	3	136	48	25	247	272	-123	YES	DPN	254926	NA	NA	0.000228793	4.52E-05	0.000545643	NA	NA	NA	0.142105263	13.5
YPR007C	REC8;SPO69	chrXVI	569336	571378	-	HH	1640	16	2043	15579	5035	20614	0	NO	TFIID	NA	NA	NA	-0.362035225	0.308089457	NA	NA	NA	NA	NA	NA	1.730924863	14	NA	NA	2.669748238	0.228016539	0.178859852	NA	NA	NA	Lethal	NA	1.03507	NA	NA	NA	257.9	N	NA	9	0.005487805	4	110	81	NA	NA	190	-156	NO	OPN	376688	1.2939	0.037356322	6.81E-05	0.000198224	4.72E-05	8.01E-06	3	NA	0.006611166	13.5
YHL015W-A	YHL015W-A	chrVIII	74699	74782	+	HH	455	8	84	8841	4083	12924	NA	NA	NA	TATA-less	2	TAF1-enriched	NA	NA	NA	NA	NA	NA	NA	NA	NA	NA	NA	NA	NA	NA	NA	NA	NA	NA	Lethal	NA	NA	NA	NA	NA	102	N	NA	2	0.004395604	4	23	219	NA	NA	242	-52	YES	DPN	74699	NA	NA	0.001051678	0.000548576	0.002526495	NA	NA	NA	0.162650602	13.5
YPR200C	ARR2;ACR2	chrXVI	939279	939671	-	HH	251	18	393	16008	7917	23925	0	NO	TFIID	NA	NA	NA	NA	NA	NA	NA	NA	NA	NA	NA	1.522266844	14	NA	NA	4.778386756	0.937151576	0.20259262	NA	NA	NA	Lethal	NA	1.00677	NA	NA	3	349.8	N	-107	2	0.007968127	4	113	47	60	110	183	-460	NA	NA	8395	0.26166	0.00862069	2.51E-05	2.34E-05	2.72E-05	1.78E-05	1	NA	0.035714286	14
YJR108W	ABM1	chrX	628712	629083	+	HT	386	32	372	29145	12707	41852	0	NO	NA	TATA-less	2	TAF1-depleted	-6.071428571	0.010257613	NA	NA	NA	NA	NA	NA	0.098195048	16	NA	NA	4.998121236	0.187826871	0.086710577	NA	NA	NA	Lethal	NA	1.03074	NA	NA	NA	280.2	N	160	3	0.007772021	4	219	48	59	208	168	-123	NO	OPN	116668	0.28408	0.08045977	6.04E-05	3.11E-05	0.000192061	0.000106497	3	NA	0.037735849	14
YDR169C-A	YDR169C-A;smORF118;SR2	chrIV	794574	794723	-	HT	1470	7	150	6564	2524	9088	NA	NA	NA	NA	NA	NA	NA	NA	NA	NA	NA	NA	NA	NA	NA	NA	NA	NA	4.579998423	0.182827185	0.093358756	NA	NA	NA	Lethal	NA	NA	NA	NA	NA	30.5	N	NA	7	0.004761905	4	11	141	NA	NA	226	-378	YES	UNCLEAR	737210	NA	NA	0.000293964	8.00E-05	0.000324417	NA	NA	NA	0.093959732	14
YAL064C-A	TDA8	chrI	13363	13743	-	HH	7823	28	381	26781	13998	40779	NA	NA	NA	NA	NA	NA	NA	NA	NA	NA	NA	NA	NA	NA	0.08689408	15	NA	NA	2.927693848	0.443294886	0.227415835	NA	NA	NA	Lethal	NA	1.00791	1.00769	NA	NA	226.9	Y	NA	45	0.005752269	5	71	119	NA	NA	190	-4	NO	OPN	13363	0.42197	0.028735632	8.16E-05	8.40E-05	3.47E-05	0.001398942	NA	NA	0.036842105	14
YOR008C-A	YOR008C-A	chrXV	342857	343081	-	HH	1254	31	225	27888	9132	37020	NA	NA	NA	NA	NA	NA	NA	NA	NA	NA	NA	NA	NA	NA	0.501733333	4	NA	NA	NA	NA	NA	NA	NA	NA	Lethal	NA	1.00802	NA	NA	NA	237.2	N	NA	6	0.004784689	4	8	144	NA	NA	255	-381	YES	UNCLEAR	342857	0.23416	0.083333333	8.26E-05	9.51E-05	0.000191415	NA	NA	NA	0.0625	14
YLR346C	YLR346C	chrXII	822287	822592	-	HT	1236	41	306	43506	21379	64885	1	YES	SAGA	TATA-containing	0	TAF1-depleted	-17.81818182	0.000764677	NA	NA	NA	NA	NA	NA	0.513180952	15	NA	NA	7.071896248	0.335635973	0.081921589	NA	NA	NA	Lethal	NA	0.99045	0.99836	NA	11	464.6	N	-52	6	0.004854369	3	7	162	59	110	349	-237	YES	UNCLEAR	255585	0.93923	0.068965517	0.002306211	9.61E-05	0.000433577	0.00013938	1	NA	0.045901639	14
YCR102C	YCR102C	chrIII	304361	305467	-	HH	2334	50	1107	51624	25815	77439	0	NO	TFIID	NA	NA	NA	NA	NA	NA	NA	NA	NA	NA	NA	0.84083866	17	8.808	0	4.532960032	0.319522512	0.124700686	NA	NA	NA	Lethal	NA	1.01608	1.01802	NA	7	275.3	Y	-70	14	0.005998286	4	8	180	78	110	188	-67	NO	OPN	11153	0.96217	0.002873563	0.000110658	0.000149106	0.000226257	0.000391327	1	NA	0.012658228	14
YGL263W	COS12	chrVII	2790	3932	+	HT	0	46	1143	42699	26834	69533	0	NO	NA	TATA-less	2	TAF1-enriched	NA	NA	NA	NA	NA	NA	NA	NA	0.610252055	14	NA	NA	5.222956235	0.856635605	0.177207327	NA	NA	NA	Lethal	NA	1.01482	NA	NA	7	131.9	Y	-6	0	NA	5	NA	NA	NA	NA	173	-330	NO	OPN	2790	0.25028	0.011494253	NA	NA	NA	0.000713386	2	NA	0.012259194	14
YPL223C	GRE1	chrXVI	128632	129138	-	HH	1024	49	507	58149	23742	81891	1	YES	SAGA	NA	NA	NA	-8.166666667	0.000215601	NA	NA	NA	NA	NA	NA	2.541548876	15	NA	NA	7.127700383	0.837084251	0.128361608	NA	NA	NA	Lethal	NA	1.02864	NA	70	1	145.7	N	-44	6	0.005859375	4	151	35	9	122	190	-241	NO	OPN	128632	4.3161	0.045977011	NA	NA	NA	0.000143951	1	NA	0.027667984	14
YJL045W	YJL045W;J1194	chrX	356024	357928	+	HT	2409	33	1905	39033	17795	56828	0	NO	TFIID	NA	NA	NA	NA	NA	NA	NA	NA	NA	NA	NA	0.107498816	14	NA	NA	3.356410948	0.223819766	0.140952924	NA	NA	NA	Lethal	NA	1.02859	0.99449	70	1	111.7	Y	NA	11	0.00456621	2	63	104	NA	NA	167	-12	NO	OPN	356024	1.4818	0.060344828	0.000800929	0.000174843	0.000289083	0.000610006	2	NA	0.007615546	14.5
YEL069C	HXT13;HXT8	chrV	21537	23231	-	HT	2958	49	1695	40956	19313	60269	2	YES	SAGA/TFIID	NA	NA	NA	NA	NA	NA	NA	NA	NA	NA	NA	1.642016667	6	NA	NA	3.355401666	1.340282299	0.345027431	NA	NA	NA	NA	NA	NA	NA	NA	NA	105.6	NA	NA	17	0.005747126	3	17	275	NA	NA	292	-58	YES	DPN	21537	0.51836	NA	0.000237176	7.20E-05	8.87E-05	2.36E-05	3	NA	0.008854782	15
YPL200W	CSM4	chrXVI	171484	171954	+	HH	329	22	471	26841	11164	38005	3	YES	NA	NA	NA	NA	-0.051948052	0.926822728	G+E	40.52592	0	6.994266	2.968444	0.008544331	1.105935251	8	NA	NA	NA	NA	NA	NA	NA	NA	Lethal	NA	1.01004	0.99676	NA	4	207.1	N	NA	2	0.006079027	4	95	116	NA	NA	211	20	UNCLEAR	UNCLEAR	171484	0.59616	0.100574713	8.88E-05	0.000111909	5.74E-05	1.25E-06	2	NA	0.031914894	15
YER121W	YER121W	chrV	402375	402719	+	HT	506	18	345	23523	12488	36011	NA	NA	SAGA	NA	NA	NA	NA	NA	NA	NA	NA	NA	NA	NA	0.136063009	14	NA	NA	6.060494649	0.057453349	0.039550284	NA	NA	NA	Lethal	NA	1.0332	0.97377	NA	7	310.3	N	-30	3	0.005928854	5	81	42	111	12	240	-117	YES	DPN	174155	0.73973	0.022988506	5.82E-05	0.00012874	6.32E-05	3.83E-05	2	NA	0.043604651	15
YMR174C	PAI3	chrXIII	610159	610365	-	HH	651	40	207	44355	21302	65657	3	YES	SAGA	NA	NA	NA	-1.625	0.186632165	NA	NA	NA	NA	NA	NA	0.05163083	14	NA	NA	6.464666999	0.510763211	0.110551247	NA	NA	NA	Lethal	NA	NA	NA	NA	8	105.8	N	-34	4	0.006144393	3	163	13	21	141	162	-88	NO	OPN	314066	1.1114	0.103448276	0.000587678	0.000136528	0.000780162	0.001260653	2	NA	0.072815534	15
YGR225W	AMA1;SPO70	chrVII	945145	947019	+	HT	498	14	1782	18426	8511	26937	0	NO	SAGA/TFIID	NA	NA	NA	-1.148809524	0.032441458	NA	NA	NA	NA	NA	NA	0.281328491	14	NA	NA	3.264542816	0.216371896	0.142487923	NA	NA	NA	Lethal	NA	1.04543	NA	NA	2	100.4	Y	-107	3	0.006024096	3	119	35	72	226	298	-110	YES	DPN	143921	0.94042	0.017241379	NA	NA	NA	6.34E-06	2	NA	0.008004269	15
YOR293C-A	YOR293C-A	chrXV	867998	868147	-	HH	193	0	150	0	0	0	NA	NA	NA	NA	NA	NA	NA	NA	NA	NA	NA	NA	NA	NA	NA	NA	NA	NA	3.59714272	0.17009599	0.114654042	NA	NA	NA	Lethal	NA	NA	NA	NA	1	196.6	N	-71	1	0.005181347	4	101	59	12	135	178	-421	NA	NA	223144	NA	NA	NA	NA	NA	NA	NA	NA	0.100671141	15
YOL097W-A	YOL097W-A;NOL020W	chrXV	136220	136405	+	HH	382	3	186	1944	754	2698	NA	NA	NA	TATA-containing	0	TAF1-depleted	NA	NA	NA	NA	NA	NA	NA	NA	NA	NA	NA	NA	4.630143295	0.138378913	0.080341609	NA	NA	NA	Lethal	NA	NA	NA	NA	5	188.8	N	-186	2	0.005235602	4	48	115	71	165	236	-190	YES	UNCLEAR	136220	NA	NA	4.58E-05	1.46E-05	0.000195899	NA	NA	NA	0.083783784	15.5
YAR071W	PHO11	chrI	227138	228541	+	HT	2569	118	1404	116340	44313	160653	2	YES	TFIID	NA	NA	NA	NA	NA	NA	NA	NA	NA	NA	NA	1.772895398	17	9.895	0	7.513661855	2.708782645	0.219046053	55	NA	NA	NA	NA	NA	NA	18	NA	115.6	NA	-1718	15	0.005838848	3	108	88	104	63	190	-163	NO	OPN	1677	2.548	NA	0.000150626	0.000122551	0.000263517	0.003468329	3	NA	0.011047755	15.5
YKR106W	GEX2	chrXI	661442	663289	+	HH	978	35	1848	44541	19772	64313	2	YES	TFIID	NA	NA	NA	NA	NA	NA	NA	NA	NA	NA	NA	2.211435946	9	NA	NA	2.00357657	0.067327946	0.129506552	NA	NA	NA	Lethal	NA	1.01139	1.03881	NA	NA	163.8	Y	NA	7	0.007157464	4	187	9	NA	NA	213	-203	UNCLEAR	UNCLEAR	3527	0.62457	0.048850575	0.000205803	0.00020824	0.000269209	8.13E-05	3	NA	0.008391987	15.5
YJR078W	BNA2	chrX	578860	580221	+	HH	670	42	1362	34773	13595	48368	3	YES	NA	NA	NA	NA	-1.342105263	0.009823515	NA	NA	NA	NA	NA	NA	1.682674847	15	NA	NA	5.958052006	0.323967855	0.095531516	NA	NA	NA	Lethal	NA	1.023	0.98008	35	NA	273.5	N	17	2	0.002985075	3	14	262	187	3	276	-61	YES	DPN	165530	0.78036	0.005747126	NA	NA	NA	2.02E-05	1	NA	0.011388685	15.5
YJL160C	PIR5	chrX	117962	118825	-	HH	1624	0	864	0	0	0	0	NO	NA	NA	NA	NA	NA	NA	G+E	40.52592	0	6.994266	2.968444	0.008544331	0.421195556	13	NA	NA	3.325214562	0.110183172	0.099824688	NA	NA	NA	Lethal	NA	1.03134	1.00877	NA	1	26.2	Y	-307	7	0.004310345	3	141	82	77	148	225	-305	YES	UNCLEAR	117962	0.57328	0.043103448	0.001359077	0.000107372	0.000581963	0.000338314	2	NA	0.018539977	16
YAL067C	SEO1	chrI	7235	9016	-	HT	2549	46	1782	55428	20498	75926	3	YES	TFIID	NA	NA	NA	NA	NA	NA	NA	NA	NA	NA	NA	1.853916404	9	NA	NA	4.975938183	1.037818165	0.204731966	NA	NA	NA	Lethal	NA	1.00597	NA	NA	1	122.7	Y	-175	14	0.00549235	4	46	124	51	209	260	-199	YES	UNCLEAR	7235	0.74975	0.060344828	0.000603394	0.000773237	0.00072714	0.00012554	3	NA	0.008983717	16
YGR144W	THI4;ESP35;MOL1	chrVII	780399	781379	+	HT	2891	40	981	47943	18418	66361	1	YES	TFIID	NA	NA	NA	-10.4	0.000864118	NA	NA	NA	NA	NA	NA	0.226025548	17	2.569	0.007627	5.278122578	0.248667518	0.094477862	NA	NA	NA	Lethal	NA	1.0007	NA	NA	NA	150.8	N	-257	16	0.005534417	3	146	13	53	84	191	-88	NO	OPN	309561	0.92529	0.166666667	NA	NA	NA	6.19E-05	2	NA	0.016836735	16.5
YJR095W	SFC1;ACR1	chrX	609773	610741	+	HT	915	42	969	49365	25710	75075	1	YES	SAGA/TFIID	NA	NA	NA	-4.970588235	0.007566474	NA	NA	NA	NA	NA	NA	7.690133333	3	NA	NA	5.038212618	0.530828807	0.144610807	NA	NA	NA	Lethal	NA	1.02524	NA	29	1	176.5	Y	NA	4	0.004371585	3	127	32	NA	NA	266	-107	YES	DPN	135010	3.0808	0.020114943	NA	NA	NA	NA	2	NA	0.017045455	16.5
YMR101C	SRT1	chrXIII	468445	469476	-	HT	372	32	1032	30483	18418	48901	0	NO	NA	NA	NA	NA	-0.013550136	0.975082326	NA	NA	NA	NA	NA	NA	0.382080952	7	NA	NA	3.237219695	0.210925752	0.141870673	NA	NA	NA	Lethal	NA	1.00191	NA	NA	NA	106.9	Y	447	2	0.005376344	4	133	49	56	154	199	-124	NO	OPN	454955	0.60683	0.00862069	NA	NA	NA	0.004120591	2	NA	0.01600388	16.5
YIR021W-A	YIR021W-A	chrIX	398514	398726	+	HT	129	3	213	4041	1750	5791	NA	NA	NA	NA	NA	NA	NA	NA	NA	NA	NA	NA	NA	NA	NA	NA	NA	NA	6.185972182	0.063694997	0.040798547	NA	NA	NA	Lethal	NA	NA	NA	NA	NA	137.7	N	NA	0	0	4	0	0	NA	NA	177	-244	NO	OPN	41162	NA	NA	1.42E-05	7.59E-06	2.08E-05	NA	NA	NA	0.080188679	17
YER175W-A	YER175W-A	chrV	540650	540814	+	HH	287	4	165	0	0	0	NA	NA	NA	NA	NA	NA	NA	NA	NA	NA	NA	NA	NA	NA	NA	NA	NA	NA	4.515050964	0.163942793	0.089677503	NA	NA	NA	Lethal	NA	NA	NA	NA	3	149.8	N	-136	2	0.006968641	3	114	88	48	133	181	-163	NO	OPN	36060	NA	NA	0.000550425	6.99E-05	0.00016746	NA	NA	NA	0.103658537	17
YFL041W-A	YFL041W-A	chrVI	48734	48925	+	HH	990	5	192	3621	1383	5004	NA	NA	NA	NA	NA	NA	NA	NA	NA	NA	NA	NA	NA	NA	NA	NA	NA	NA	5.715362173	0.15999029	0.069984692	NA	NA	NA	Lethal	NA	NA	NA	NA	8	117.8	N	-818	5	0.005050505	4	52	129	3	195	181	-23	NO	OPN	48734	NA	NA	7.19E-05	7.79E-05	0.000142725	NA	NA	NA	0.089005236	17
YGR146C-A	YGR146C-A	chrVII	785276	785437	-	HT	617	8	162	9246	2994	12240	NA	NA	NA	TATA-less	2	TAF1-enriched	NA	NA	NA	NA	NA	NA	NA	NA	NA	NA	NA	NA	3.553741794	0.156717067	0.111396688	NA	NA	NA	Lethal	NA	NA	NA	NA	9	173.7	N	-56	0	0	0	274	869	330	813	NA	NA	NA	NA	305503	NA	NA	NA	NA	NA	NA	NA	NA	0.105590062	17
YGR059W	SPR3	chrVII	607563	609101	+	HT	420	28	1539	35979	11938	47917	3	YES	NA	NA	NA	NA	-2.908119658	2.76E-05	NA	NA	NA	NA	NA	NA	0.70411	6	NA	NA	3.453354658	0.20241541	0.130280856	NA	NA	NA	Lethal	NA	1.05604	NA	100	NA	124.9	Y	NA	2	0.004761905	5	22	168	NA	NA	190	-53	NO	OPN	481839	0.75751	0.100574713	5.90E-05	3.83E-05	4.06E-05	0.000649678	1	NA	0.011378414	17.5
YNR072W	HXT17	chrXIV	772657	774351	+	HH	1189	68	1695	69504	28313	97817	2	YES	SAGA/TFIID	NA	NA	NA	NA	NA	NA	NA	NA	NA	NA	NA	0.8712	2	NA	NA	3.090188597	1.051272835	0.331797214	NA	NA	NA	Lethal	NA	1.02742	NA	31	1	240.8	Y	NA	7	0.0058873	4	8	194	NA	NA	202	-67	NO	OPN	9982	0.34847	0.123563218	0.000363811	0.000394434	0.000165913	6.29E-05	3	NA	0.010330579	17.5
YNL018C	YNL018C;N2831	chrXIV	599936	601774	-	HH	1133	24	1839	24420	10980	35400	0	NO	NA	NA	NA	NA	NA	NA	NA	NA	NA	NA	NA	NA	2.047177661	15	NA	NA	2.387022155	0.163951371	0.169629381	NA	NA	NA	Lethal	NA	0	1.02866	NA	NA	161.4	Y	NA	7	0.006178288	4	121	21	NA	NA	199	-96	NO	OPN	182559	0.32882	0.051724138	NA	NA	NA	1.69E-05	2	NA	0.009521219	17.5
YJL047C-A	YJL047C-A	chrX	349044	349178	-	HT	402	8	135	10200	5737	15937	NA	NA	NA	NA	NA	NA	NA	NA	NA	NA	NA	NA	NA	NA	NA	NA	NA	NA	5.197572941	0.232642188	0.092799074	NA	NA	NA	Lethal	NA	NA	NA	NA	26	376.2	N	-189	2	0.004975124	3	444	18	171	14	220	-278	UNCLEAR	UNCLEAR	349044	NA	NA	0.000190149	2.30E-05	7.46E-05	NA	NA	NA	0.134328358	18
YER138W-A	YER138W-A	chrV	449474	449578	+	HH	7655	69	105	59217	42305	101522	NA	NA	NA	NA	NA	NA	NA	NA	NA	NA	NA	NA	NA	NA	0.5824	8	NA	NA	NA	NA	NA	NA	NA	NA	NA	NA	NA	NA	NA	NA	69.7	NA	NA	36	0.004702809	3	17	174	NA	NA	420	-249	YES	UNCLEAR	127296	NA	NA	0.000128178	7.92E-05	1.52E-05	0.001328563	NA	NA	0.173076923	18
YML054C-A	YML054C-A	chrXIII	167623	167781	-	HT	1335	2	159	2067	558	2625	NA	NA	NA	NA	NA	NA	NA	NA	NA	NA	NA	NA	NA	NA	NA	NA	NA	NA	NA	NA	NA	NA	NA	NA	Lethal	NA	NA	NA	NA	NA	101.3	N	NA	7	0.005243446	4	57	113	NA	NA	284	-188	YES	UNCLEAR	167623	NA	NA	0.00165933	8.62E-05	0.000181118	NA	NA	NA	0.113924051	18
YGL258W	VEL1	chrVII	11110	11730	+	HT	1715	26	621	22170	8387	30557	1	YES	TFIID	NA	NA	NA	NA	NA	NA	NA	NA	NA	NA	NA	0.090322917	4	NA	NA	2.337524366	0.141006566	0.160643635	NA	NA	NA	Lethal	NA	1.0266	1.01128	NA	2	114.2	Y	-673	10	0.005830904	4	95	110	48	84	205	20	NO	OPN	11110	0.61213	0.028735632	0.000111484	0.000240229	0.000501581	9.10E-05	3	NA	0.029032258	18
YFL051C	YFL051C	chrVI	30058	30540	-	HT	2732	31	483	28059	28175	56234	0	NO	TFIID	NA	NA	NA	NA	NA	NA	NA	NA	NA	NA	NA	1.540456236	12	NA	NA	3.024796261	0.618365514	0.259971957	NA	NA	NA	Lethal	NA	1.00134	1.0353	NA	NA	142	Y	NA	13	0.004758419	4	136	81	NA	NA	227	-437	NA	NA	30058	1.1823	0.048850575	0.00012245	0.000313745	0.000356179	8.54E-05	3	NA	0.037344398	18
YDR523C	SPS1	chrIV	1485566	1487038	-	HT	504	31	1473	37797	13578	51375	0	NO	NA	NA	NA	NA	-1.348484848	0.035051346	G+E	40.52592	0	6.994266	2.968444	0.008544331	1.094307753	8	NA	NA	3.254964892	0.108092395	0.101006951	NA	NA	NA	Lethal	NA	1.02173	NA	NA	NA	99.7	Y	NA	2	0.003968254	4	34	127	NA	NA	279	-346	YES	UNCLEAR	44895	0.44544	0.103448276	2.47E-05	5.68E-05	0.000232447	NA	3	NA	0.012567935	18.5
YOR100C	CRC1	chrXV	513295	514278	-	HH	966	37	984	43782	21719	65501	0	NO	NA	NA	NA	NA	-0.818181818	0.221376517	NA	NA	NA	NA	NA	NA	0.071670736	15	NA	NA	4.913671815	0.234339429	0.098518216	NA	NA	NA	Lethal	NA	1.00906	NA	NA	3	300.2	Y	-142	5	0.005175983	4	34	130	12	229	241	-205	YES	UNCLEAR	513295	2.5062	0.109195402	0.000986437	8.34E-05	0.000513455	4.76E-05	3	NA	0.018819939	18.5
YIR027C	DAL1	chrIX	406260	407642	-	HH	826	32	1383	44193	17831	62024	0	NO	SAGA/TFIID	NA	NA	NA	-2.689411765	0.00010114	NA	NA	NA	NA	NA	NA	1.984656228	15	NA	NA	5.437523429	0.2117467	0.084626657	NA	NA	NA	Lethal	NA	1.0144	NA	71	NA	280	N	-310	4	0.004842615	4	52	97	27	254	281	-358	YES	UNCLEAR	32246	0.79933	0.048850575	0.000488279	9.09E-05	9.72E-05	NA	1	NA	0.013386397	18.5
YDR402C	DIT2;CYP56	chrIV	1272234	1273703	-	HH	899	26	1470	23649	10598	34247	0	NO	TFIID	NA	NA	NA	-2.83933518	0.000250248	NA	NA	NA	NA	NA	NA	0.771524811	12	NA	NA	3.105888781	0.096919052	0.100234835	NA	NA	NA	Lethal	NA	1.01659	NA	92	NA	50.6	N	NA	4	0.004449388	3	21	196	NA	NA	268	-271	YES	UNCLEAR	258230	0.25613	0.086206897	0.000166801	4.67E-05	0.000204432	4.88E-05	2	NA	0.012933969	19
YNR071C	YNR071C;N3605	chrXIV	770440	771468	-	HH	1189	68	1029	73551	39630	113181	1	YES	TFIID	NA	NA	NA	NA	NA	NA	NA	NA	NA	NA	NA	0.580466667	4	NA	NA	3.975038878	0.860923622	0.233421541	NA	NA	NA	Lethal	NA	0.99602	1.07897	NA	1	170.9	Y	NA	7	0.0058873	4	114	67	NA	NA	154	-294	NO	OPN	12865	0.68259	0.048850575	0.000156355	0.000198048	7.01E-05	0.00161473	3	NA	0.01848249	19
YPL171C	OYE3	chrXVI	226169	227371	-	HH	943	65	1203	68115	32097	100212	3	YES	TFIID	NA	NA	NA	-1.24137931	0.017066455	G+E	40.52592	0	6.994266	2.968444	0.008544331	1.93428296	9	NA	NA	4.534960992	0.227511104	0.105178687	NA	NA	NA	Lethal	NA	1.00646	NA	78	6	155.7	Y	NA	2	0.002120891	1	154	58	NA	NA	NA	NA	NA	NA	226169	0.80355	0.063218391	0.002216925	0.000302545	0.000184557	0.004510274	1	NA	0.015806988	19
YCL001W-B	YCL001W-B	chrIII	113770	114024	+	HT	229	5	255	6444	3376	9820	NA	NA	NA	NA	NA	NA	NA	NA	NA	NA	NA	NA	NA	NA	1.192541071	8	NA	NA	3.595838401	0.213213115	0.128412349	NA	NA	NA	Lethal	NA	NA	NA	NA	NA	169.9	N	NA	2	0.008733624	5	93	81	NA	NA	203	-280	NO	OPN	113770	NA	NA	3.05E-05	5.04E-05	2.81E-05	0.000122981	NA	NA	0.076771654	19.5
YIR042C	YIR042C	chrIX	435273	435983	-	HT	0	45	711	43863	18994	62857	2	YES	SAGA/TFIID	NA	NA	NA	NA	NA	NA	NA	NA	NA	NA	NA	0.735561541	12	NA	NA	4.902954802	3.48099932	0.380534537	NA	NA	NA	Lethal	NA	0.98917	0.98919	NA	8	239.4	N	-70	0	NA	4	143	NA	NA	1	139	-394	NO	OPN	3905	0.41327	0.117816092	0.001664157	0.001548004	0.002551671	1.02E-05	3	NA	0.027464789	19.5
YBR196C-B	YBR196C-B	chrII	614526	614630	-	HT	573	4	105	4755	1305	6060	NA	NA	NA	NA	NA	NA	NA	NA	NA	NA	NA	NA	NA	NA	NA	NA	NA	NA	6.200980407	0.154146221	0.063314923	NA	NA	NA	Lethal	NA	NA	NA	NA	NA	156	N	NA	3	0.005235602	3	166	3	NA	NA	237	-78	YES	DPN	198554	NA	NA	NA	NA	NA	NA	NA	NA	0.1875	19.5
YDR106W	ARP10	chrIV	667004	667858	+	HH	234	18	855	24582	10046	34628	0	NO	TFIID	NA	NA	NA	-0.682291667	0.275038252	NA	NA	NA	NA	NA	NA	0.245598214	8	NA	NA	4.229475582	0.1220878	0.082613232	NA	NA	NA	NA	NA	NA	NA	NA	NA	133.9	NA	-18	2	0.008547009	5	21	98	39	80	169	-303	NO	OPN	667004	0.38125	NA	5.68E-05	0.00011898	0.000810816	0.000104818	3	NA	0.023419204	20
YGL188C-A	YGL188C-A	chrVII	148824	148964	-	HT	740	5	141	4926	1545	6471	NA	NA	NA	NA	NA	NA	NA	NA	NA	NA	NA	NA	NA	NA	NA	NA	NA	NA	5.738782523	0.099837814	0.05505893	NA	NA	NA	Lethal	NA	NA	NA	NA	2	101.9	N	-15	3	0.004054054	3	8	247	23	232	259	-322	YES	UNCLEAR	148824	NA	NA	NA	NA	NA	NA	NA	NA	0.142857143	20
YLR053C	YLR053C;L2137	chrXII	248100	248426	-	HT	291	26	327	31287	12576	43863	1	YES	SAGA	NA	NA	NA	NA	0.002120856	G+E	40.52592	0	6.994266	2.968444	0.008544331	0.533774944	16	NA	NA	6.828330735	0.161817328	0.058911213	NA	NA	NA	Lethal	NA	0.98539	1.00246	NA	1	175.1	N	NA	1	0.003436426	3	10	154	NA	NA	225	-229	YES	UNCLEAR	248100	0.96672	0.051724138	0.000175443	2.10E-05	2.94E-05	0.000145073	1	NA	0.062883436	20.5
YJL077W-B	YJL077W-B	chrX	294047	294145	+	HH	66	10	99	12183	4263	16446	NA	NA	NA	NA	NA	NA	NA	NA	NA	NA	NA	NA	NA	NA	NA	NA	NA	NA	6.394022444	0.077485723	0.043534813	NA	NA	NA	Lethal	NA	NA	NA	NA	65	190.9	N	NA	0	0	4	95	103	NA	NA	296	-336	YES	UNCLEAR	294047	NA	NA	0.00012909	0.00013222	9.24E-06	NA	NA	NA	0.209183673	20.5
YHR153C	SPO16	chrVIII	402086	402682	-	HH	284	32	597	30615	12157	42772	3	YES	SAGA/TFIID	NA	NA	NA	-1.195121951	0.112275828	NA	NA	NA	NA	NA	NA	0.209824028	17	3.418	0.002279	5.391090409	0.027058442	0.030512288	NA	NA	NA	Lethal	NA	1.00493	NA	NA	9	130.1	N	-7	2	0.007042254	3	156	1	6	276	282	-76	YES	DPN	159961	0.28218	0.043103448	0.000477215	0.002060994	0.004663859	NA	2	NA	0.034395973	20.5
YLR415C	YLR415C	chrXII	954259	954597	-	HH	413	34	339	31695	27559	59254	0	NO	TFIID	NA	NA	NA	-2.906976744	0.154242378	NA	NA	NA	NA	NA	NA	0.931433363	13	NA	NA	4.690830975	0.259153431	0.108524726	NA	NA	NA	Lethal	NA	1.00822	1.01818	NA	1	413.9	N	NA	1	0.002421308	2	455	364	NA	NA	176	-439	NA	NA	123580	0.21694	0.048850575	NA	NA	NA	9.65E-05	1	NA	0.060650888	20.5
YDR366C	YDR366C	chrIV	1212438	1212836	-	HH	12	48	399	42180	32004	74184	0	NO	SAGA	NA	NA	NA	NA	NA	NA	NA	NA	NA	NA	NA	0.55471428	13	NA	NA	3.330252587	0.232059493	0.144651351	NA	NA	NA	NA	NA	NA	NA	NA	NA	140.7	NA	-63	0	0	5	9	161	72	98	170	-66	NO	OPN	319097	1.1454	NA	5.91E-05	3.45E-05	6.55E-06	6.46E-05	2	NA	0.052763819	21
YMR230W-A	YMR230W-A	chrXIII	733268	733456	+	HT	127	5	189	6852	2301	9153	NA	NA	NA	NA	NA	NA	NA	NA	NA	NA	NA	NA	NA	NA	NA	NA	NA	NA	4.335393556	0.150105698	0.089365535	NA	NA	NA	Lethal	NA	NA	NA	NA	NA	216.8	N	NA	0	0	4	1	178	NA	NA	181	-253	NO	OPN	190975	NA	NA	0.000624988	0.000683331	0.003242662	NA	NA	NA	0.111702128	21
YDR281C	PHM6	chrIV	1022007	1022321	-	HT	1190	149	315	162147	63190	225337	3	YES	SAGA/TFIID	TATA-less	1	TAF1-enriched	-0.833333333	0.498370458	NA	NA	NA	NA	NA	NA	0.403014479	16	NA	NA	10.4254149	0.069249647	0.025241516	NA	NA	NA	Lethal	NA	0.97653	NA	NA	68	141.5	N	-55	6	0.005042017	4	77	84	132	29	304	-159	YES	UNCLEAR	509612	1.6809	0.120689655	0.000402558	0.000194956	0.000120332	0.001511477	2	NA	0.068471338	21.5
YOR313C	SPS4	chrXV	901858	902874	-	HH	1886	47	1017	53787	26402	80189	0	NO	NA	NA	NA	NA	-1.3125	0.073222777	NA	NA	NA	NA	NA	NA	0.391296538	17	5.94	7.00E-06	5.387270372	0.088919957	0.055351686	NA	NA	NA	Lethal	NA	1.01917	NA	NA	40	291.8	N	NA	9	0.004772004	4	94	62	NA	NA	274	-137	YES	DPN	188417	1.1977	0.074712644	NA	NA	NA	4.77E-05	2	NA	0.021161417	21.5
YJL043W	YJL043W;J1204	chrX	360130	360903	+	HH	454	29	774	40359	16319	56678	0	NO	TFIID	NA	NA	NA	NA	NA	NA	NA	NA	NA	NA	NA	1.05125	2	NA	NA	3.161843938	0.103055595	0.101530227	NA	NA	NA	Lethal	NA	1.01625	0.99918	NA	2	413	N	-133	1	0.002202643	3	52	176	185	43	282	-251	YES	UNCLEAR	360130	0.21584	0.034482759	0.000312543	4.09E-05	0.000187487	1.31E-06	1	NA	0.028460543	22
YER185W	PUG1	chrV	559454	560365	+	HH	774	22	912	25668	10095	35763	2	YES	SAGA/TFIID	NA	NA	NA	NA	NA	NA	NA	NA	NA	NA	NA	0.402248918	15	NA	NA	4.082256016	0.069229669	0.064453408	NA	NA	NA	Lethal	NA	1.01385	1.00691	NA	NA	135.5	Y	NA	4	0.005167959	5	79	91	NA	NA	200	-297	NO	OPN	16509	0.44611	0.028735632	0.000514131	6.38E-05	0.000222689	4.03E-05	2	NA	0.024149286	22
YHR139C	SPS100	chrVIII	378219	379199	-	HH	1373	50	981	54660	23760	78420	1	YES	SAGA	NA	NA	NA	-5.685714286	0.000105707	NA	NA	NA	NA	NA	NA	2.227091667	4	NA	NA	4.644251138	0.318623682	0.121541147	NA	NA	NA	Lethal	NA	1.00678	NA	NA	1	185.5	Y	NA	8	0.005826657	3	13	134	NA	NA	166	-209	NO	OPN	183444	4.7059	0.048850575	0.000297393	0.000112058	0.000224675	0.000121983	3	NA	0.02244898	22
YFR012W	DCV1	chrVI	167888	168496	+	HH	630	22	609	25659	9200	34859	0	NO	SAGA/TFIID	NA	NA	NA	-0.8	0.330148896	NA	NA	NA	NA	NA	NA	1.266688839	8	NA	NA	2.894413947	0.240457324	0.169417537	NA	NA	NA	Lethal	NA	1.01374	0.99327	NA	NA	102.2	N	89	2	0.003174603	3	77	104	160	12	181	2	NO	OPN	101665	0.26	0.08045977	0.000297619	0.000151855	0.000230108	2.24E-05	2	NA	0.036184211	22
YNL146W	YNL146W;N1203;N1785	chrXIV	351715	352017	+	HH	135	88	303	94839	42382	137221	0	NO	NA	TATA-less	2	TAF1-enriched	-0.25	0.697783535	NA	NA	NA	NA	NA	NA	0.258445546	15	NA	NA	5.191799332	0.06536527	0.049244262	49.5	NA	NA	Lethal	NA	1.01213	1.00739	NA	20	182.5	N	-123	1	0.007407407	3	128	57	66	196	262	-132	YES	DPN	351715	0.23004	0.031609195	8.67E-05	0.000163227	6.62E-05	4.48E-05	2	NA	0.072847682	22
YFR032C-B	YFR032C-B	chrVI	223710	223973	-	HT	353	6	264	7362	2217	9579	NA	NA	NA	NA	NA	NA	NA	NA	NA	NA	NA	NA	NA	NA	NA	NA	NA	NA	6.606178231	0.046101621	0.03250183	NA	NA	NA	Lethal	NA	NA	NA	11	NA	120.1	N	NA	1	0.002832861	3	42	239	NA	NA	281	-33	YES	DPN	46188	NA	NA	NA	NA	NA	NA	NA	NA	0.08365019	22
YOL159C-A	YOL159C-A	chrXV	15233	15505	-	HT	1776	6	273	9408	4951	14359	0	NO	NA	TATA-containing	0	TAF1-enriched	NA	NA	NA	NA	NA	NA	NA	NA	1.853433333	3	NA	NA	6.200642384	0.384410473	0.099991002	NA	NA	NA	Lethal	NA	NA	NA	NA	35	212	N	-27	10	0.005630631	3	204	85	231	58	242	-160	YES	UNCLEAR	15233	NA	NA	9.38E-05	4.95E-05	4.78E-05	0.000198415	NA	NA	0.082720588	22.5
YDR034W-B	YDR034W-B	chrIV	521314	521469	+	HH	622	54	156	60303	25879	86182	0	NO	NA	NA	NA	NA	NA	NA	NA	NA	NA	NA	NA	NA	0.525548697	16	NA	NA	6.71084796	0.33669001	0.086464476	116.5	23.78	0.801	Lethal	NA	NA	NA	NA	14	84.7	N	-40	2	0.003215434	3	85	64	125	24	447	-139	YES	DPN	521314	NA	NA	6.81E-05	8.58E-05	0.000425748	0.000130489	NA	NA	0.14516129	22.5
YKR105C	VBA5	chrXI	658716	660464	-	HH	978	25	1749	27954	12229	40183	2	YES	TFIID	NA	NA	NA	NA	NA	NA	NA	NA	NA	NA	NA	5.282563556	4	NA	NA	1.595076165	0.075488847	0.172250293	NA	NA	NA	Lethal	NA	1.03084	0.9978	NA	NA	188.6	Y	NA	7	0.007157464	4	117	31	NA	NA	171	-384	NO	OPN	6352	0.41179	0.043103448	5.39E-05	3.07E-05	1.45E-05	1.32E-05	3	NA	0.013157895	23
YKL096C-B	YKL096C-B	chrXI	259073	259222	-	HH	31	11	150	14352	5397	19749	NA	NA	NA	NA	NA	NA	NA	NA	NA	NA	NA	NA	NA	NA	NA	NA	NA	NA	4.284926936	0.135268337	0.085833072	NA	NA	NA	Lethal	NA	NA	NA	NA	NA	136.2	N	NA	0	0	4	68	231	NA	NA	299	-7	YES	DPN	259073	NA	NA	0.000209921	0.000175783	0.000288224	NA	NA	NA	0.154362416	23
YOR268C	YOR268C	chrXV	825534	825932	-	HH	453	48	399	45774	23249	69023	NA	NA	NA	NA	NA	NA	0.037037037	0.965824491	NA	NA	NA	NA	NA	NA	0.223649663	11	NA	NA	2.908167626	0.079156786	0.096744134	NA	NA	NA	Lethal	NA	1.01012	0.99998	NA	NA	204.4	N	NA	3	0.006622517	4	375	56	NA	NA	185	-461	NA	NA	265359	0.24758	0.045977011	0.008075993	0.000281318	0.000545388	0.000301967	1	NA	0.057788945	23
YGL051W	MST27;DUP2	chrVII	403687	404391	+	HT	385	25	705	22485	6671	29156	0	NO	TFIID	NA	NA	NA	NA	NA	NA	NA	NA	NA	NA	NA	2.278654138	17	16.548	0	2.250086742	1.051546084	0.455737635	NA	NA	NA	Lethal	NA	1.00501	1.01478	35	NA	165.4	Y	NA	2	0.005194805	4	11	152	NA	NA	199	-227	NO	OPN	403687	0.18376	0.005747126	NA	NA	NA	0.000234352	1	NA	0.032670455	23
YOR387C	YOR387C	chrXV	1069621	1070241	-	HT	1552	33	621	29847	12437	42284	2	YES	TFIID	NA	NA	NA	NA	NA	G+E	40.52592	0	6.994266	2.968444	0.008544331	0.470214286	14	NA	NA	2.525937263	0.082669759	0.113828438	NA	NA	NA	NA	NA	NA	NA	NA	NA	177.2	NA	-667	10	0.006443299	4	85	108	42	87	193	10	NO	OPN	21050	0.75279	NA	0.00018169	0.000162603	7.93E-05	5.75E-05	3	NA	0.037903226	23.5
YOR031W	CRS5	chrXV	389213	389422	+	HT	529	24	27	23811	9642	33453	1	YES	SAGA	NA	NA	NA	NA	NA	G+E	40.52592	0	6.994266	2.968444	0.008544331	0.206882309	17	4.826	2.90E-05	7.410789623	0.044643757	0.028511225	NA	NA	NA	Lethal	NA	1.0089	NA	NA	31	357.9	N	NA	3	0.005671078	4	35	220	NA	NA	255	-40	YES	DPN	389213	2.27	0.063218391	NA	NA	NA	0.00026424	3	NA	0.112440191	23.5
YPL201C	YIG1	chrXVI	169770	171155	-	HH	329	32	1386	45648	20329	65977	1	YES	NA	NA	NA	NA	-0.997798569	0.023914522	NA	NA	NA	NA	NA	NA	0.113131177	15	NA	NA	3.341254658	0.135550884	0.110189852	NA	NA	NA	Lethal	NA	1.00935	0.98458	NA	NA	135.4	N	151	2	0.006079027	4	100	52	123	51	211	-288	UNCLEAR	UNCLEAR	169770	2.7132	0.048850575	0.000105989	2.42E-05	1.28E-05	2.61E-05	1	NA	0.01732852	24
YBR018C	GAL7	chrII	274427	275527	-	HT	726	32	1101	40608	14848	55456	1	YES	NA	NA	NA	NA	NA	1	NA	NA	NA	NA	NA	NA	0.976849451	14	NA	NA	3.927950612	1.003367939	0.25501404	NA	NA	NA	Lethal	NA	1.02617	NA	NA	67	212.2	N	NA	5	0.006887052	4	122	59	NA	NA	163	-271	NO	OPN	274427	1.9884	0.077586207	9.05E-05	8.63E-05	0.000350199	0.000292195	2	NA	0.021818182	24
YNL270C	ALP1	chrXIV	135940	137661	-	HH	38	33	1722	37041	14728	51769	0	NO	TFIID	TATA-less	1	TAF1-enriched	-0.653561517	0.096895769	NA	NA	NA	NA	NA	NA	0.329649906	7	NA	NA	4.007725415	0.076838401	0.069165768	NA	NA	NA	Lethal	NA	1.01185	NA	42	8	125.8	Y	-154	1	0.026315789	3	173	5	149	30	340	-259	YES	UNCLEAR	135940	0.66814	0.068965517	0.000192125	0.00015324	0.000205583	0.001831654	2	NA	0.013945381	24
YDL024C	DIA3	chrIV	408451	409857	-	HH	1968	35	1407	50205	19047	69252	0	NO	NA	NA	NA	NA	NA	NA	NA	NA	NA	NA	NA	NA	0.610954091	11	NA	NA	4.151394369	0.286056641	0.128834455	NA	NA	NA	Lethal	NA	1.05364	NA	NA	2	136.4	Y	NA	7	0.003556911	3	142	28	NA	NA	183	-274	NO	OPN	408451	2.8386	0.025862069	NA	NA	NA	0.000154623	3	NA	0.017069701	24
YOL132W	GAS4	chrXV	71300	72715	+	HT	610	30	1416	34032	15945	49977	0	NO	NA	NA	NA	NA	-2.331428571	0.000979923	NA	NA	NA	NA	NA	NA	0.107891667	4	NA	NA	3.043321664	0.078150183	0.091858033	NA	NA	NA	Lethal	NA	1.00776	1.01974	NA	NA	169.5	Y	NA	3	0.004918033	4	18	215	NA	NA	233	-57	YES	DPN	71300	0.39915	0.094827586	8.22E-05	3.26E-05	7.59E-05	4.45E-05	3	NA	0.017314488	24.5
YOR351C	MEK1;MRE4	chrXV	995018	996511	-	HH	702	54	1494	55767	32535	88302	1	YES	TFIID	NA	NA	NA	-3.066666667	0.001109283	NA	NA	NA	NA	NA	NA	0.44436572	12	NA	NA	2.205826211	0.119804615	0.156915369	NA	NA	NA	Lethal	NA	0.99876	NA	130	NA	162	Y	NA	4	0.005698006	3	115	26	NA	NA	196	-101	NO	OPN	94780	0.26396	0.020114943	5.01E-05	4.02E-05	6.91E-05	1.70E-05	2	NA	0.016409913	24.5
YHR136C	SPL2	chrVIII	374654	375100	-	HH	609	142	447	143883	62343	206226	3	YES	TFIID	TATA-containing	0	TAF1-depleted	-4.028301887	0.017352149	G+E	40.52592	0	6.994266	2.968444	0.008544331	0.87183319	16	NA	NA	9.045565878	0.039276418	0.021909385	764	21.17	5.666	Lethal	NA	1.03927	NA	NA	1	121.5	N	92	2	0.003284072	3	29	134	146	63	464	-209	YES	UNCLEAR	187543	0.61071	0.031609195	0.015982424	5.47E-05	0.000480532	0.0003942	1	NA	0.054932735	24.5
YER044C-A	MEI4	chrV	238460	239774	-	HT	258	25	1227	29055	13015	42070	0	NO	TFIID	NA	NA	NA	-1.030769231	0.050986654	NA	NA	NA	NA	NA	NA	0.171745	11	NA	NA	3.313065034	0.171771971	0.125096797	NA	NA	NA	Lethal	NA	1.02943	NA	NA	NA	124.1	N	-6	2	0.007751938	4	152	10	158	4	184	-85	NO	OPN	238460	0.34473	0.025862069	NA	NA	NA	0.000315659	1	NA	0.018645358	24.5
YPL277C	YPL277C	chrXVI	15405	16868	-	HH	6070	29	1464	26508	11921	38429	0	NO	TFIID	NA	NA	NA	NA	NA	G+E	40.52592	0	6.994266	2.968444	0.008544331	0.725820876	17	3.687	0.000754	5.285482683	0.216096793	0.087950742	NA	NA	NA	Lethal	NA	NA	NA	NA	NA	147.3	Y	NA	35	0.005766063	3	158	36	NA	NA	278	-111	YES	DPN	15405	0.47782	NA	NA	NA	NA	NA	3	NA	0.016746411	24.5
YDR461C-A	YDR461C-A	chrIV	1385524	1385766	-	HH	307	0	243	0	0	0	NA	NA	NA	TATA-less	2	TAF1-enriched	0.607142857	0.392084113	NA	NA	NA	NA	NA	NA	NA	NA	NA	NA	7.739590816	0.073989928	0.035145385	NA	NA	NA	NA	NA	NA	NA	NA	NA	98.1	NA	-76	2	0.006514658	4	17	119	93	43	166	-194	NO	OPN	146167	NA	NA	7.84E-05	2.85E-05	0.000102804	NA	NA	NA	0.103305785	25
YMR105W-A	YMR105W-A	chrXIII	478064	478258	+	HH	458	1	195	0	0	0	NA	NA	NA	NA	NA	NA	NA	NA	NA	NA	NA	NA	NA	NA	NA	NA	NA	NA	NA	NA	NA	NA	NA	NA	Lethal	NA	NA	NA	NA	NA	136	N	NA	0	0	0	492	1007	NA	NA	NA	NA	NA	NA	446173	NA	NA	4.52E-05	6.14E-05	0.000169011	NA	NA	NA	0.128865979	25
YHL050C	YHL050C	chrVIII	445	3311	-	HT	415	49	2094	45072	17579	62651	0	NO	TFIID	NA	NA	NA	NA	NA	G+E	40.52592	0	6.994266	2.968444	0.008544331	0.953011618	17	14.203	0	2.370031989	1.492323062	0.515438931	NA	NA	NA	NA	NA	NA	NA	NA	NA	110.1	NA	-39	2	0.004819277	3	116	25	14	241	255	-100	YES	DPN	445	0.35773	NA	0.000136671	0.000388035	0.000224421	0.000130228	1	NA	0.008722959	25
YLR031W	YLR031W	chrXII	204225	204785	+	HT	144	19	561	16818	8342	25160	0	NO	TFIID	NA	NA	NA	-0.585253456	0.417178997	NA	NA	NA	NA	NA	NA	0.058669265	14	NA	NA	4.952298798	0.289409048	0.108629858	NA	NA	NA	Lethal	NA	1.0101	0.9958	NA	NA	161.9	N	NA	1	0.006944444	3	118	115	NA	NA	212	-385	UNCLEAR	UNCLEAR	204225	0.57174	0.086206897	7.00E-05	0.000172477	0.000223767	8.29E-05	3	NA	0.045535714	25.5
YLL042C	ATG10;APG10	chrXII	52087	52590	-	HT	541	16	504	18993	7593	26586	0	NO	TFIID	NA	NA	NA	-0.385185185	0.525608651	NA	NA	NA	NA	NA	NA	0.534524394	15	NA	NA	4.939043549	0.168166396	0.083028416	NA	NA	NA	Lethal	NA	1.019	NA	NA	2	355.5	N	-49	3	0.005545287	4	28	192	77	143	220	-47	UNCLEAR	UNCLEAR	52087	0.30132	0.037356322	NA	NA	NA	0.000197828	1	NA	0.050695825	25.5
YPL279C	YPL279C	chrXVI	13228	14355	-	HT	698	59	1128	53670	21452	75122	0	NO	TFIID	TATA-less	1	TAF1-depleted	NA	NA	NA	NA	NA	NA	NA	NA	1.495579653	16	NA	NA	3.207741525	0.211313949	0.143306113	NA	NA	NA	NA	NA	NA	NA	NA	NA	133	NA	-39	5	0.007163324	4	161	2	37	119	156	-77	NO	OPN	13228	0.26874	NA	4.96E-05	8.75E-05	3.57E-05	NA	3	NA	0.023070098	26
YNL128W	TEP1	chrXIV	382359	383663	+	HT	157	26	1305	28695	15918	44613	0	NO	TFIID	NA	NA	NA	-1.255050505	0.028711535	NA	NA	NA	NA	NA	NA	0.137664008	14	NA	NA	4.275003357	0.105480266	0.075971228	NA	NA	NA	Lethal	NA	1.00417	NA	23	NA	210.5	N	NA	1	0.006369427	4	134	66	NA	NA	177	-299	NO	OPN	382359	0.28634	0.077586207	8.16E-05	0.000162336	3.74E-05	NA	2	NA	0.01993865	26
YBR285W	YBR285W;YBR2023	chrII	773922	774356	+	HT	290	29	435	36369	18291	54660	1	YES	NA	NA	NA	NA	-0.644736842	0.497774906	NA	NA	NA	NA	NA	NA	3.558498889	10	NA	NA	6.286457093	0.123662436	0.055938774	NA	NA	NA	Lethal	NA	0	0.98744	NA	6	160	N	-183	1	0.003448276	4	33	172	11	164	205	-42	NO	OPN	38828	1.8869	0.126436782	0.000120496	0.000229865	0.000433612	7.79E-06	2	NA	0.059907834	26
YGL089C	MF(ALPHA)2;MF-ALPHA-2;MFAL2	chrVII	344791	345153	-	HT	1253	61	363	67179	34351	101530	1	YES	SAGA/TFIID	NA	NA	NA	0.3125	0.585778391	NA	NA	NA	NA	NA	NA	1.037622222	10	NA	NA	2.776482416	0.830550839	0.32823749	NA	NA	NA	Lethal	NA	1.03816	NA	NA	NA	172.5	Y	NA	6	0.004788508	4	131	42	NA	NA	186	-117	NO	OPN	344791	0.14677	0.034482759	NA	NA	NA	0.000183718	1	NA	0.071823204	26
YGR066C	YGR066C	chrVII	620921	621799	-	HT	573	36	879	40047	22132	62179	1	YES	TFIID	NA	NA	NA	-1.082251082	0.096187966	NA	NA	NA	NA	NA	NA	0.209795238	7	NA	NA	5.582507538	0.294691952	0.09724221	NA	NA	NA	Lethal	NA	1.05374	1.01496	NA	NA	102	Y	NA	3	0.005235602	4	32	117	NA	NA	181	-192	NO	OPN	469141	1.7349	0.014367816	NA	NA	NA	9.02E-06	3	NA	0.029612756	26
YLR385C	SWC7;AWS1	chrXII	892992	893390	-	HH	238	21	399	26121	9980	36101	0	NO	SAGA/TFIID	NA	NA	NA	0.020979021	0.967792469	NA	NA	NA	NA	NA	NA	2.216880999	16	NA	NA	5.515398093	0.038284386	0.035475945	NA	NA	NA	Lethal	NA	1.02455	0.99607	NA	NA	320.1	N	-38	1	0.004201681	4	142	9	29	222	251	-84	YES	DPN	184787	0.57807	0.014367816	3.09E-05	2.71E-05	2.65E-05	0.000117608	1	NA	0.066582915	26.5
YKL037W	AIM26	chrXI	369365	369721	+	HT	248	20	357	28830	9263	38093	NA	NA	TFIID	NA	NA	NA	NA	NA	NA	NA	NA	NA	NA	NA	0.070199469	14	NA	NA	3.282000812	0.073635248	0.082680709	NA	NA	NA	Lethal	NA	0.96062	1.01301	NA	NA	293.4	N	NA	0	0	0	308	746	NA	NA	NA	NA	NA	NA	297095	0.36095	0.025862069	0.00060722	5.14E-05	5.25E-05	4.12E-05	1	NA	0.074438202	26.5
YCL026C-B	HBN1	chrIII	73405	73986	-	HT	718	10	582	10932	2743	13675	NA	NA	NA	NA	NA	NA	0.459459459	0.274174247	NA	NA	NA	NA	NA	NA	NA	NA	NA	NA	7.167285902	0.442893429	0.092852775	NA	NA	NA	Lethal	NA	NA	NA	NA	18	162.9	Y	-99	4	0.005571031	3	126	41	58	217	275	-116	YES	DPN	73405	NA	NA	5.13E-05	0.000136072	6.92E-05	NA	NA	NA	0.045611015	26.5
YOR390W	YOR390W	chrXV	1076784	1077911	+	HT	697	63	1128	64914	22812	87726	0	NO	TFIID	TATA-less	1	TAF1-depleted	NA	1	NA	NA	NA	NA	NA	NA	0.242637689	16	NA	NA	3.858015466	0.421276473	0.168236273	NA	NA	NA	NA	NA	NA	NA	40	NA	155.5	NA	-47	5	0.007173601	4	164	4	43	113	156	-79	NO	OPN	13380	0.25369	NA	7.80E-05	2.03E-05	1.90E-05	3.54E-05	3	NA	0.023957409	27
YLR010C	TEN1	chrXII	167320	167802	-	HH	1301	17	483	11913	3692	15605	0	NO	TFIID	TATA-less	1	TAF1-enriched	-1.265625	0.123683925	G+E	40.52592	0	6.994266	2.968444	0.008544331	0.084622038	17	1.664	0.105415	5.873907897	0.047091687	0.036944092	NA	NA	NA	Essential	Essential	0	0.97146	NA	15	324.8	N	-234	7	0.005380477	4	14	210	24	115	224	-61	UNCLEAR	UNCLEAR	167320	0.69031	0.043103448	4.00E-05	2.22E-05	2.69E-05	3.94E-05	2	NA	0.056016598	27
YBR196C-A	YBR196C-A	chrII	614024	614173	-	HT	353	6	150	6483	2187	8670	NA	NA	NA	NA	NA	NA	NA	NA	NA	NA	NA	NA	NA	NA	NA	NA	NA	NA	5.893406669	0.123083313	0.059529629	NA	NA	NA	Lethal	NA	NA	NA	NA	NA	152.2	N	NA	1	0.002832861	2	280	291	NA	NA	169	-366	NO	OPN	199011	NA	NA	NA	NA	NA	NA	NA	NA	0.181208054	27
YBR240C	THI2;PHO6	chrII	700490	701842	-	HT	747	30	1353	38007	16562	54569	0	NO	SAGA/TFIID	NA	NA	NA	-0.540935673	0.239330333	NA	NA	NA	NA	NA	NA	1.46353308	14	NA	NA	5.396724018	0.128293974	0.066370168	NA	NA	NA	Lethal	NA	1.03508	NA	NA	NA	135.6	N	NA	3	0.004016064	3	52	118	NA	NA	170	-23	NO	OPN	111342	0.40658	0.045977011	NA	NA	NA	0.000135255	1	NA	0.019970414	27
YCR020C	PET18;HIT2	chrIII	154012	154659	-	HT	171	25	648	27690	11107	38797	1	YES	TFIID	NA	NA	NA	-4.050505051	0.004081156	NA	NA	NA	NA	NA	NA	1.734926158	17	7.902	1.00E-06	6.568129729	0.120108435	0.052764889	NA	NA	NA	Lethal	NA	1.02843	NA	NA	1	293.5	N	NA	1	0.005847953	3	137	39	NA	NA	196	-114	NO	OPN	154012	0.29387	0.031609195	0.000147246	2.78E-05	4.45E-05	2.28E-05	2	NA	0.042503864	27.5
YLR329W	REC102	chrXII	786442	787333	+	HT	324	24	795	19719	12369	32088	0	NO	NA	NA	NA	NA	-0.042735043	0.941073986	NA	NA	NA	NA	NA	NA	0.22673	5	NA	NA	3.40813634	0.364188066	0.17707037	NA	NA	NA	Lethal	NA	1.04763	NA	32	NA	362.7	N	NA	2	0.00617284	4	136	46	NA	NA	197	-284	NO	OPN	290844	0.29599	0	9.53E-05	5.47E-05	0.000132651	0.000101342	3	NA	0.030864198	27.5
YFR026C	ULI1	chrVI	205748	206257	-	HH	1195	32	510	39099	13643	52742	0	NO	TFIID	NA	NA	NA	NA	NA	NA	NA	NA	NA	NA	NA	1.23875	5	NA	NA	5.248795521	0.137740233	0.070708358	NA	NA	NA	Lethal	NA	0.99744	1.02673	NA	23	111.4	N	-984	6	0.005020921	3	125	84	53	185	315	-159	YES	UNCLEAR	63904	0.58255	0.123563218	7.39E-05	5.23E-05	0.000205112	0.000132648	1	NA	0.055009823	28
YNL086W	SNN1	chrXIV	466334	466642	+	HT	387	12	309	12276	4930	17206	0	NO	TFIID	TATA-less	2	TAF1-enriched	-2.214285714	0.059850962	G+E	40.52592	0	6.994266	2.968444	0.008544331	0.074278458	17	1.862	0.058294	5.878349116	0.058213029	0.041044477	NA	NA	NA	Lethal	NA	1.0155	1.03319	119	49	154.4	N	-138	2	0.005167959	3	110	37	101	130	231	-112	YES	DPN	317691	0.18576	0.068965517	0.000213898	5.81E-05	5.93E-05	0.000201233	3	NA	0.090909091	28
YDL218W	YDL218W	chrIV	66493	67446	+	HT	728	32	954	35448	14271	49719	1	YES	TFIID	NA	NA	NA	-1.1775	0.078336983	G+E	40.52592	0	6.994266	2.968444	0.008544331	0.522446474	13	NA	NA	4.471388661	0.260416267	0.114127849	NA	NA	NA	Lethal	NA	1.01011	1.01079	NA	2	276.3	N	NA	4	0.005494505	4	147	3	NA	NA	246	-398	YES	UNCLEAR	66493	0.84479	0.094827586	0.00012566	8.40E-05	0.000100553	3.08E-05	1	NA	0.029380902	28
YDR403W	DIT1	chrIV	1274602	1276212	+	HH	899	43	1611	48441	24362	72803	1	YES	TFIID	NA	NA	NA	-0.857440166	0.093279447	NA	NA	NA	NA	NA	NA	0.271536667	6	NA	NA	4.229651067	0.106421693	0.077127729	NA	NA	NA	Lethal	NA	0.9998	NA	NA	1	118.7	N	NA	4	0.004449388	4	67	115	NA	NA	182	-8	NO	OPN	255721	0.33989	0.114942529	0.000131301	6.99E-05	0.000259701	0.000153902	2	NA	0.017701863	28.5
YOR348C	PUT4	chrXV	986899	988782	-	HH	1007	57	1884	60738	25389	86127	1	YES	NA	NA	NA	NA	-1.86977887	0.006148149	NA	NA	NA	NA	NA	NA	1.308958604	16	NA	NA	7.027667032	0.478956009	0.098477414	NA	NA	NA	Lethal	NA	1.00973	NA	37	2	143.2	Y	NA	2	0.001986097	1	1701	96	NA	NA	NA	NA	NA	NA	102509	1.0734	0.014367816	0.00017767	0.000157653	0.000127251	0.000439943	1	NA	0.015135422	28.5
YCR098C	GIT1	chrIII	297049	298605	-	HT	2227	38	1557	38409	20164	58573	1	YES	NA	NA	NA	NA	NA	NA	G+E	40.52592	0	6.994266	2.968444	0.008544331	1.294877222	14	NA	NA	9.029954131	0.243539683	0.054651152	NA	NA	NA	Lethal	NA	0.978	NA	NA	21	186.5	N	26	13	0.005837449	5	88	98	62	124	186	13	NO	OPN	18015	1.0015	0.017241379	0.00011693	0.000176989	0.005622609	5.25E-05	3	NA	0.018316195	28.5
YJL038C	LOH1	chrX	375115	375774	-	HH	888	56	660	64671	36726	101397	2	YES	SAGA/TFIID	NA	NA	NA	NA	NA	NA	NA	NA	NA	NA	NA	0.445220238	7	NA	NA	2.90257575	0.148203818	0.132631333	NA	NA	NA	Lethal	NA	1.03341	0.98615	NA	1	396.6	Y	-319	4	0.004504505	4	11	146	22	256	278	-372	YES	UNCLEAR	369977	0.25831	0.040229885	NA	NA	NA	0.001812615	2	NA	0.043247344	28.5
YOR237W	HES1;OSH5	chrXV	781994	783298	+	HT	453	39	1305	45123	20066	65189	0	NO	SAGA/TFIID	NA	NA	NA	-2.802631579	0.001358014	NA	NA	NA	NA	NA	NA	1.033965777	15	NA	NA	3.687526171	0.133777401	0.099187345	NA	NA	NA	Lethal	NA	1.05526	NA	45	NA	181.7	Y	-175	2	0.004415011	4	4	176	179	1	180	-71	NO	OPN	307993	0.4471	0.017241379	NA	NA	NA	0.000511539	1	NA	0.021855828	28.5
YHL022C	SPO11	chrVIII	62961	64157	-	HT	305	30	1197	34428	19546	53974	0	NO	TFIID	NA	NA	NA	-1.844761905	0.001589123	NA	NA	NA	NA	NA	NA	0.082642415	16	NA	NA	3.171042811	0.1423077	0.118963051	NA	NA	NA	Lethal	NA	1.02005	NA	NA	NA	104.7	N	NA	2	0.006557377	5	91	55	NA	NA	211	-130	UNCLEAR	UNCLEAR	62961	0.68374	0.074712644	8.16E-05	6.39E-05	9.50E-05	0.000210619	1	NA	0.024247492	29
YDR040C	ENA1;HOR6;PMR2;PMR2A	chrIV	535192	538467	-	HH	1336	49	3276	51603	21565	73168	0	NO	TFIID	NA	NA	NA	NA	NA	G+E	40.52592	0	6.994266	2.968444	0.008544331	2.901670271	17	8.922	0	4.705929812	1.588424946	0.267816854	56.5	NA	NA	NA	NA	NA	NA	NA	NA	133.1	NA	-445	3	0.002245509	3	96	71	194	809	180	-146	NO	OPN	535192	0.39414	NA	2.72E-05	1.80E-05	1.94E-05	1.94E-05	2	NA	0.009007634	29.5
YGR035W-A	YGR035W-A	chrVII	557565	557786	+	HH	143	5	222	4425	2454	6879	NA	NA	NA	NA	NA	NA	NA	0.010822202	NA	NA	NA	NA	NA	NA	NA	NA	NA	NA	NA	NA	NA	NA	NA	NA	Lethal	NA	NA	NA	NA	NA	125.8	N	NA	0	0	2	493	179	NA	NA	328	-254	YES	UNCLEAR	533154	NA	NA	0.000129157	2.53E-05	0.000201146	NA	NA	NA	0.133484163	29.5
YLR125W	YLR125W;L3101	chrXII	393484	393894	+	HH	3214	27	411	24156	11739	35895	0	NO	TFIID	TATA-less	2	TAF1-enriched	-0.23015873	0.713959568	NA	NA	NA	NA	NA	NA	0.252965268	17	2.187	0.039517	5.555827449	0.051387493	0.040801861	NA	NA	NA	Lethal	NA	1.0186	NA	NA	9	146.5	N	NA	17	0.005289359	4	156	13	NA	NA	198	-88	NO	OPN	393484	0.2723	0	0.000224569	3.92E-05	5.41E-05	NA	3	NA	0.07195122	29.5
YIL014C-A	YIL014C-A	chrIX	325212	325526	-	HH	577	17	315	25107	12894	38001	NA	NA	NA	NA	NA	NA	NA	NA	NA	NA	NA	NA	NA	NA	1.24865999	16	NA	NA	4.364026372	2.36352127	0.352283572	NA	NA	NA	NA	NA	NA	NA	NA	NA	116.6	NA	-79	2	0.003466205	2	112	35	44	389	433	-110	YES	DPN	114362	NA	NA	NA	NA	NA	0.000129415	NA	NA	0.093949045	29.5
YLR364W	GRX8	chrXII	854062	854391	+	HT	344	45	330	36870	16057	52927	0	NO	TFIID	TATA-containing	0	TAF1-enriched	-0.339285714	0.717927653	G+E	40.52592	0	6.994266	2.968444	0.008544331	0.426410176	17	3.982	0.000253	7.181471977	0.061106366	0.034421497	NA	NA	NA	Lethal	NA	1.0314	1.02341	NA	57	319.8	N	NA	2	0.005813953	4	121	60	NA	NA	217	-135	UNCLEAR	UNCLEAR	223786	0.55386	0.031609195	NA	NA	NA	8.65E-05	2	NA	0.089665653	29.5
YHR014W	SPO13	chrVIII	132047	132922	+	HH	601	21	876	30744	15834	46578	0	NO	SAGA/TFIID	NA	NA	NA	-2.272727273	0.039612287	G+E	40.52592	0	6.994266	2.968444	0.008544331	0.080080405	15	NA	NA	2.419334218	0.089453297	0.123623862	NA	NA	NA	Lethal	NA	1.00316	NA	NA	NA	93.8	N	NA	3	0.004991681	3	164	10	NA	NA	190	-85	NO	OPN	132047	1.0415	0.034482759	0.000103815	4.19E-05	3.27E-05	1.91E-05	2	NA	0.034285714	30
YHR007C-A	YHR007C-A	chrVIII	122550	122765	-	HT	124	10	216	10323	3637	13960	NA	NA	NA	TATA-less	2	TAF1-depleted	NA	NA	NA	NA	NA	NA	NA	NA	NA	NA	NA	NA	6.735465221	0.079469541	0.041853594	NA	NA	NA	Lethal	NA	NA	NA	NA	1	109.7	N	NA	0	0	3	292	139	NA	NA	257	-214	YES	UNCLEAR	122550	NA	NA	0.000620775	5.12E-05	0.000278662	NA	NA	NA	0.139534884	30
YNL117W	MLS1	chrXIV	406358	408022	+	HH	794	42	1665	56529	25027	81556	1	YES	NA	NA	NA	NA	-4.160606061	0.000413101	NA	NA	NA	NA	NA	NA	0.428942534	9	NA	NA	4.939350074	0.153111448	0.079219852	NA	NA	NA	Lethal	NA	1.03006	NA	NA	2	174.3	Y	NA	4	0.005037783	3	37	117	NA	NA	191	-192	NO	OPN	376311	3.2395	0.045977011	0.028772776	5.98E-05	0.000150494	2.50E-06	2	NA	0.018028846	30
YDR042C	YDR042C;YD6888.04c	chrIV	540601	541203	-	HT	1471	61	603	67089	31532	98621	0	NO	TFIID	NA	NA	NA	-1.12244898	0.1700805	NA	NA	NA	NA	NA	NA	0.200039901	14	NA	NA	3.39854473	0.124777835	0.10393833	NA	NA	NA	Lethal	NA	1.01755	1.01035	NA	3	107.6	N	-75	4	0.002719239	4	28	133	103	58	260	-208	YES	UNCLEAR	540601	0.29788	0.063218391	0.000528143	7.17E-05	0.001343034	2.08E-05	1	NA	0.049833887	30
YLR037C	PAU23;DAN2	chrXII	222685	223059	-	HT	1862	39	375	32139	10040	42179	2	YES	TFIID	NA	NA	NA	NA	NA	NA	NA	NA	NA	NA	NA	0.532851446	17	2.627	0.007859	4.674491096	0.0983962	0.067104992	NA	NA	NA	Lethal	NA	0.99791	0.98746	NA	26	139.3	Y	-197	10	0.005370569	4	118	28	7	185	192	-265	NO	OPN	222685	0.27461	0.140804598	NA	NA	NA	7.98E-05	1	NA	0.080213904	30
YML058W-A	HUG1	chrXIII	158760	158966	+	HH	502	50	207	47199	19081	66280	1	YES	NA	NA	NA	NA	1	0.377343393	NA	NA	NA	NA	NA	NA	2.810079723	17	8.034	1.00E-06	5.12454933	0.378393036	0.120037209	NA	NA	NA	Lethal	NA	NA	NA	NA	4	120.7	N	-43	3	0.005976096	4	46	88	89	45	280	-163	YES	UNCLEAR	158760	NA	NA	NA	NA	NA	0.000363839	NA	NA	0.145631068	30
YFL057C	AAD16	chrVI	14305	14763	-	HT	30	21	459	26178	11144	37322	0	NO	TFIID	NA	NA	NA	NA	NA	NA	NA	NA	NA	NA	NA	0.840256439	17	10.587	0	3.98573692	3.064284607	0.439193516	NA	NA	NA	NA	NA	NA	NA	17	NA	128.3	NA	NA	0	0	4	176	68	NA	NA	195	-326	NO	OPN	14305	1.2571	NA	0.001481143	2.93E-05	0.000162012	0.000174315	3	NA	0.066593886	30.5
YJL089W	SIP4	chrX	265926	268415	+	HH	875	40	2490	44256	18194	62450	1	YES	TFIID	NA	NA	NA	-0.373846154	0.333611428	NA	NA	NA	NA	NA	NA	0.346223333	10	NA	NA	4.355746846	0.068663853	0.060159117	NA	NA	NA	Lethal	NA	1.01375	NA	109	NA	206.6	N	-156	5	0.005714286	5	89	134	22	114	223	14	UNCLEAR	UNCLEAR	265926	2.1917	0.00862069	0.001025191	9.47E-05	0.000174579	4.66E-05	1	NA	0.012253917	30.5
YDR437W	GPI19	chrIV	1337352	1337774	+	HT	399	16	423	15561	4261	19822	0	NO	TFIID	TATA-less	2	TAF1-enriched	-1.357142857	0.309335987	NA	NA	NA	NA	NA	NA	0.114172718	16	NA	NA	5.456771846	0.039689367	0.036509114	NA	NA	NA	Essential	Essential	0	1.01381	NA	13	105.7	N	-59	3	0.007518797	4	134	17	42	100	142	-92	NO	OPN	194159	0.20187	0.077586207	0.000157176	7.34E-05	4.06E-05	4.28E-05	2	NA	0.073459716	31
YDL169C	UGX2	chrIV	158064	158735	-	HH	869	23	672	31644	11492	43136	0	NO	SAGA	NA	NA	NA	-0.788888889	0.212761335	G+E	40.52592	0	6.994266	2.968444	0.008544331	0.514620425	12	NA	NA	6.468647287	0.070529994	0.041055699	NA	NA	NA	Lethal	NA	1.03615	NA	NA	16	228.7	N	NA	5	0.00575374	4	18	249	NA	NA	267	-57	YES	DPN	158064	1.7015	0.07183908	0.000147233	0.000153765	0.000263768	6.50E-05	1	NA	0.046199702	31
YGL183C	MND1	chrVII	156543	157285	-	HH	621	25	660	27141	10189	37330	0	NO	TFIID	NA	NA	NA	-1.0125	0.233820368	NA	NA	NA	NA	NA	NA	0.424231818	11	NA	NA	3.521856736	0.29955422	0.155405375	NA	NA	NA	NA	NA	NA	NA	34	NA	167.5	NA	NA	4	0.006441224	5	64	129	NA	NA	193	-11	NO	OPN	156543	0.34799	NA	NA	NA	NA	2.44E-05	2	NA	0.041778976	31
YIR030C	DCG1	chrIX	412036	412770	-	HT	245	27	735	30969	12693	43662	0	NO	SAGA/TFIID	NA	NA	NA	0.454411765	0.205118961	NA	NA	NA	NA	NA	NA	0.846970455	12	NA	NA	5.182931136	0.226952518	0.091916201	NA	NA	NA	Lethal	NA	1.03678	NA	3	11	217.1	N	-40	1	0.004081633	4	13	145	53	105	227	-220	YES	UNCLEAR	27118	0.73209	0.054597701	0.000187968	3.35E-05	0.000159641	0.000673804	3	NA	0.042915531	31.5
YLR411W	CTR3	chrXII	947253	947978	+	HT	6272	30	726	42414	13407	55821	0	NO	TFIID	NA	NA	NA	-4.890909091	0.010617614	NA	NA	NA	NA	NA	NA	1.123895867	17	1.285	0.252707	8.089199759	0.315851815	0.069476211	NA	NA	NA	NA	NA	NA	NA	NA	NA	219.2	NA	-114	34	0.005420918	4	133	21	93	73	266	-379	YES	UNCLEAR	130199	0.15229	NA	NA	NA	NA	5.24E-05	2	NA	0.043448276	31.5
YOR034C-A	YOR034C-A;NOR002C	chrXV	397426	397668	-	HT	67	0	243	0	0	0	NA	NA	NA	NA	NA	NA	NA	NA	NA	NA	NA	NA	NA	NA	NA	NA	NA	NA	6.427348356	0.018020863	0.020886033	NA	NA	NA	Lethal	NA	NA	NA	NA	3	322.3	N	NA	0	0	4	13	192	NA	NA	205	-62	NO	OPN	397426	NA	NA	1.69E-05	1.50E-05	6.33E-05	NA	NA	NA	0.132231405	32
YHR021W-A	ECM12	chrVIII	149225	149680	+	HH	556	24	456	26181	11867	38048	0	NO	TFIID	TATA-less	2	TAF1-enriched	NA	NA	NA	NA	NA	NA	NA	NA	0.24783269	11	NA	NA	2.441918725	0.145218605	0.156055804	NA	NA	NA	Lethal	NA	1.04882	NA	NA	NA	137.2	N	120	2	0.003597122	3	30	122	94	90	427	-197	YES	UNCLEAR	149225	0.6719	0.017241379	0.000793623	0.000361861	0.000733587	0.000407837	NA	NA	0.07032967	32
YGL194C-A	YGL194C-A	chrVII	139719	139961	-	HT	407	0	243	0	0	0	NA	NA	NA	TATA-less	1	TAF1-enriched	-1.909090909	0.390892062	NA	NA	NA	NA	NA	NA	NA	NA	NA	NA	6.125975262	0.046300211	0.035124993	NA	NA	NA	NA	NA	NA	NA	NA	NA	205.4	NA	-191	2	0.004914005	3	146	17	174	28	236	-294	YES	UNCLEAR	139719	NA	NA	NA	NA	NA	NA	NA	NA	0.132231405	32
YMR018W	YMR018W;YM9711.06	chrXIII	310208	311752	+	HT	1526	20	1545	26220	10602	36822	0	NO	TFIID	NA	NA	NA	0.387818844	0.218096042	NA	NA	NA	NA	NA	NA	1.679184408	11	NA	NA	3.93674216	0.131075277	0.091965179	NA	NA	NA	Lethal	NA	1.0222	0.97906	NA	NA	104.5	Y	NA	7	0.004587156	4	32	224	NA	NA	256	-43	YES	DPN	310208	0.5156	0.043103448	0.000182071	2.87E-05	0.000116657	0.000613227	3	NA	0.021049223	32.5
YLR408C	BLS1	chrXII	933885	934253	-	HT	161	18	369	22767	7561	30328	0	NO	TFIID	NA	NA	NA	-2	0.17748765	NA	NA	NA	NA	NA	NA	0.088854311	17	1.553	0.135333	5.750647546	0.059126324	0.042283769	NA	NA	NA	Lethal	NA	0.99148	1.0133	NA	1	352.5	N	17	0	0	4	67	219	50	236	286	-8	YES	DPN	143924	0.47203	0.043103448	8.50E-05	8.23E-05	2.86E-05	4.59E-05	2	NA	0.088315217	32.5
YJL088W	ARG3	chrX	268799	269815	+	HT	384	59	1017	46935	23281	70216	1	YES	SAGA	TATA-containing	0	TAF1-depleted	-5.583333333	0.00057948	G+E	40.52592	0	6.994266	2.968444	0.008544331	0.173254717	17	2.869	0.003529	8.353253752	0.02580961	0.019232469	NA	NA	NA	Lethal	NA	1.00826	NA	NA	9	166.2	N	-22	1	0.002604167	4	95	153	117	131	265	-228	YES	UNCLEAR	268799	1.8375	0.037356322	NA	NA	NA	0.000243933	1	NA	0.031988189	32.5
YJR161C	COS5	chrX	742848	743999	-	HT	0	24	1152	27030	10108	37138	2	YES	TFIID	NA	NA	NA	NA	NA	G+E	40.52592	0	6.994266	2.968444	0.008544331	1.097580027	16	NA	NA	3.109166472	1.831878579	0.435315736	NA	NA	NA	NA	NA	NA	NA	NA	NA	213.6	NA	-7	0	NA	3	NA	NA	NA	NA	145	-296	NO	OPN	1752	0.96601	NA	NA	NA	NA	0.00033472	2	NA	0.028236316	32.5
YBR180W	DTR1	chrII	589741	591459	+	HH	627	28	1719	26985	13426	40411	0	NO	NA	NA	NA	NA	-0.958261864	0.031951772	NA	NA	NA	NA	NA	NA	0.40949881	7	NA	NA	2.726838842	0.075510766	0.10077318	NA	NA	NA	Lethal	NA	1.0073	NA	31	NA	246.5	Y	NA	4	0.006379585	4	140	35	NA	NA	263	-397	YES	UNCLEAR	221725	0.86378	0.07183908	0.000287293	4.16E-05	0.000160808	4.92E-05	3	NA	0.019208382	33
YHR140W	YHR140W	chrVIII	380572	381291	+	HH	1373	52	720	66189	22487	88676	1	YES	TFIID	NA	NA	NA	-0.956521739	0.178463273	NA	NA	NA	NA	NA	NA	1.851708818	15	NA	NA	5.357624831	0.638718508	0.14917033	NA	NA	NA	Lethal	NA	1.01496	1.02625	28	3	229.6	N	NA	8	0.005826657	5	148	15	NA	NA	152	-240	NO	OPN	181352	1.6448	0.077586207	0.000226217	5.56E-05	0.000339423	0.001575272	2	NA	0.045897079	33
YAR029W	YAR029W;FUN57	chrI	186321	186545	+	HT	725	27	225	35316	23256	58572	0	NO	NA	NA	NA	NA	NA	NA	NA	NA	NA	NA	NA	NA	1.716917828	13	NA	NA	4.601526506	1.034409389	0.221026476	NA	NA	NA	Lethal	NA	1.02254	0.97524	105	5	152.2	N	NA	4	0.005517241	3	155	15	NA	NA	224	-273	UNCLEAR	UNCLEAR	43673	0.31614	0.057471264	0.000311939	6.42E-05	0.000106419	6.26E-05	2	NA	0.147321429	33
YMR040W	YET2	chrXIII	350381	350863	+	HH	859	45	483	50301	20175	70476	0	NO	TFIID	TATA-less	2	TAF1-enriched	-1.676470588	0.151377484	G+E	40.52592	0	6.994266	2.968444	0.008544331	0.420846492	15	NA	NA	6.041258041	0.070982423	0.044100958	NA	NA	NA	Lethal	NA	1.04825	0.959	49	16	117.3	Y	-69	3	0.003492433	2	107	56	13	178	191	-131	NO	OPN	350381	1.4504	0.037356322	3.66E-05	0.000110449	5.98E-05	0.002408858	2	NA	0.06846473	33
YLR281C	YLR281C	chrXII	704493	704960	-	HH	226	45	468	41334	13506	54840	1	YES	TFIID	NA	NA	NA	-0.97037037	0.253481715	NA	NA	NA	NA	NA	NA	0.955856944	9	NA	NA	4.831325924	0.102375918	0.066226617	NA	NA	NA	Lethal	NA	1.0498	1.03004	NA	1	228.4	N	-14	1	0.004424779	4	311	11	3	233	236	-86	YES	DPN	373217	0.30086	0.146551724	8.90E-05	0.000138463	4.02E-05	0.000127277	1	NA	0.070663812	33
YMR001C-A	YMR001C-A	chrXIII	271347	271577	-	HH	616	3	231	3621	1383	5004	NA	NA	NA	NA	NA	NA	NA	NA	NA	NA	NA	NA	NA	NA	NA	NA	NA	NA	5.709829682	0.097605169	0.054715863	NA	NA	NA	Lethal	NA	NA	NA	NA	NA	127	N	NA	3	0.00487013	3	51	284	NA	NA	335	-24	YES	DPN	271347	NA	NA	0.000771934	0.000310337	0.000298414	NA	NA	NA	0.143478261	33
YDL210W	UGA4	chrIV	84270	85985	+	HH	3858	29	1716	40128	17308	57436	2	YES	SAGA	NA	NA	NA	-1.468409586	0.012016353	NA	NA	NA	NA	NA	NA	0.609732386	12	NA	NA	4.112733925	0.205788808	0.110301206	NA	NA	NA	Lethal	NA	1.01647	NA	NA	NA	265.1	Y	NA	22	0.005702436	4	84	116	NA	NA	233	-191	YES	UNCLEAR	84270	1.6547	0.020114943	0.000125328	9.25E-05	8.90E-05	2.10E-05	3	NA	0.019533528	33.5
YHL006C	SHU1	chrVIII	98343	98795	-	HH	424	18	453	21186	8324	29510	0	NO	TFIID	TATA-less	1	TAF1-enriched	-1.3203125	0.130545299	NA	NA	NA	NA	NA	NA	0.196909766	17	1.757	0.085149	5.793225656	0.042126807	0.035428995	NA	NA	NA	Lethal	NA	1.00735	NA	NA	39	105.9	N	-63	2	0.004716981	4	71	94	134	31	287	-169	YES	UNCLEAR	98343	0.22739	0.043103448	8.82E-05	3.20E-05	4.38E-05	0.000181385	1	NA	0.075221239	34
YLR146W-A	YLR146W-A	chrXII	433870	434058	+	HH	145	0	189	0	0	0	NA	NA	NA	NA	NA	NA	-3.666666667	0.256625858	NA	NA	NA	NA	NA	NA	NA	NA	NA	NA	6.674831806	0.068821599	0.03930267	NA	NA	NA	NA	NA	NA	NA	NA	NA	275.7	NA	0	0	0	4	53	164	53	164	217	-22	UNCLEAR	UNCLEAR	433870	NA	NA	2.58E-05	6.67E-05	2.81E-05	NA	NA	NA	0.180851064	34
YPR015C	YPR015C;LPZ14c	chrXVI	590283	591026	-	HT	1306	52	744	52989	32402	85391	1	YES	TFIID	TATA-containing	0	TAF1-enriched	-1.470588235	0.046092641	NA	NA	NA	NA	NA	NA	0.409696474	13	NA	NA	3.775612164	0.071863952	0.071001606	NA	NA	NA	Lethal	NA	1.03649	1.02897	44	4	223.1	Y	-86	6	0.004594181	3	59	134	145	48	388	-209	YES	UNCLEAR	357040	0.83548	0.051724138	0.000149944	0.000208303	6.66E-05	NA	3	NA	0.045760431	34
YKR095W-A	PCC1	chrXI	625864	626205	+	HT	432	2	267	3252	1269	4521	NA	NA	NA	TATA-containing	0	TAF1-enriched	NA	0.000135097	NA	NA	NA	NA	NA	NA	NA	NA	NA	NA	7.083344397	0.019051686	0.019486254	NA	NA	NA	NA	NA	NA	NA	NA	NA	295.1	NA	-10	3	0.006944444	4	92	59	102	49	151	-284	NO	OPN	40611	NA	NA	NA	NA	NA	NA	NA	NA	0.099706745	34
YDR374W-A	YDR374W-A	chrIV	1224757	1225026	+	HH	363	0	270	0	0	0	NA	NA	NA	TATA-less	2	TAF1-enriched	-1.3	0.357892265	NA	NA	NA	NA	NA	NA	NA	NA	NA	NA	6.875241697	0.046532634	0.031375514	NA	NA	NA	NA	NA	NA	NA	NA	NA	117.8	NA	0	2	0.005509642	4	13	108	13	108	188	-321	NO	OPN	306907	NA	NA	7.94E-05	1.79E-05	9.01E-05	NA	NA	NA	0.128252788	34.5
YIL060W	YIL060W	chrIX	246392	246826	+	HH	833	46	435	49023	32812	81835	NA	NA	TFIID	NA	NA	NA	NA	NA	G+E	40.52592	0	6.994266	2.968444	0.008544331	0.752558333	3	NA	NA	2.913911194	0.277734105	0.180858238	NA	NA	NA	Lethal	NA	0.97758	0.98265	NA	NA	122.4	Y	-115	3	0.003601441	3	21	216	136	101	237	-54	YES	DPN	193062	0.71596	0.028735632	0.001331811	2.65E-05	5.89E-05	0.000676936	1	NA	0.079493088	34.5
YER066W	RRT13	chrV	290242	290799	+	HH	3328	19	558	24534	9306	33840	0	NO	TFIID	NA	NA	NA	NA	NA	NA	NA	NA	NA	NA	NA	0.479953793	15	NA	NA	5.393084442	0.034995767	0.034687303	NA	NA	NA	Lethal	NA	1.01495	0.9821	NA	20	214.9	Y	-927	17	0.005108173	4	150	8	48	134	209	-83	UNCLEAR	UNCLEAR	286075	0.32917	0.083333333	4.22E-05	4.63E-05	0.000232089	1.19E-05	3	NA	0.061938959	34.5
YKR104W	YKR104W	chrXI	656836	657756	+	HT	100	18	921	19311	5507	24818	0	NO	NA	NA	NA	NA	NA	NA	NA	NA	NA	NA	NA	NA	1.154944139	15	NA	NA	4.887580645	0.934514073	0.197787566	NA	NA	NA	Lethal	NA	1.03018	1.01259	107	4	299	Y	NA	1	0.01	5	76	99	NA	NA	218	-321	UNCLEAR	UNCLEAR	9060	0.30764	0.040229885	0.000109444	5.67E-05	2.33E-05	2.40E-05	2	NA	0.0375	34.5
YIL024C	YIL024C	chrIX	308602	309171	-	HT	215	18	570	19755	9589	29344	0	NO	TFIID	NA	NA	NA	-14	9.04E-05	G+E	40.52592	0	6.994266	2.968444	0.008544331	0.097764345	17	0.908	0.572016	5.578221375	0.04310207	0.037218024	NA	NA	NA	Lethal	NA	1.02901	0.99158	NA	14	167	N	NA	0	0	4	3	239	NA	NA	242	-72	YES	DPN	130717	0.72914	0.048850575	3.15E-05	5.16E-05	1.83E-05	1.44E-05	1	NA	0.061511424	35
YLR164W	YLR164W	chrXII	493883	494389	+	HH	629	0	507	0	0	0	0	NO	TFIID	TATA-less	1	TAF1-enriched	-1.0625	0.269095543	NA	NA	NA	NA	NA	NA	0.151023156	17	1.293	0.266959	6.126610379	0.034161242	0.030168003	NA	NA	NA	Lethal	NA	1.00035	1.01642	NA	7	276.6	Y	NA	4	0.0063593	3	166	38	NA	NA	175	-113	NO	OPN	493883	1.5059	0.08045977	0.000152092	0.000125201	0.00028329	0.000144825	1	NA	0.06916996	35
YKR005C	YKR005C;YK104	chrXI	448521	450167	-	HT	256	14	1578	15312	7180	22492	0	NO	NA	NA	NA	NA	-0.521296296	0.202885083	NA	NA	NA	NA	NA	NA	0.150232689	10	NA	NA	4.621183288	0.068298361	0.056552518	NA	NA	NA	Lethal	NA	1.02073	1.01014	NA	2	210	N	NA	2	0.0078125	4	140	25	NA	NA	179	-386	NO	OPN	216649	0.38192	0.00862069	5.68E-05	2.92E-05	2.24E-05	6.79E-05	3	NA	0.021567436	35.5
YIL099W	SGA1;SGA	chrIX	178004	179653	+	HH	754	60	1650	66153	38202	104355	0	NO	TFIID	NA	NA	NA	-2.256528418	1.13E-05	NA	NA	NA	NA	NA	NA	0.2592	2	NA	NA	4.690530663	0.187026803	0.092199793	NA	NA	NA	Lethal	NA	1.02073	NA	NA	NA	244.8	N	-61	2	0.00265252	2	208	57	4	497	501	-132	YES	DPN	178004	1.2603	0.051724138	0.000296136	0.000129335	0.000317247	0.000202552	1	NA	0.021528199	35.5
YGL121C	GPG1	chrVII	280777	281157	-	HT	477	37	381	42351	15775	58126	3	YES	SAGA	NA	NA	NA	-1.4	0.393595772	G+E	40.52592	0	6.994266	2.968444	0.008544331	0.847838447	12	NA	NA	6.8736624	0.206021899	0.066034135	NA	NA	NA	Lethal	NA	1.0257	1.01564	NA	32	114.2	N	-126	2	0.004192872	4	2	163	128	37	218	-238	UNCLEAR	UNCLEAR	280777	2.6849	0.040229885	NA	NA	NA	0.001202981	2	NA	0.093421053	35.5
YMR069W	NAT4	chrXIII	407709	408566	+	HT	125	21	858	17832	6616	24448	0	NO	SAGA/TFIID	TATA-less	2	TAF1-depleted	-0.498951782	0.269776325	NA	NA	NA	NA	NA	NA	0.400606428	13	NA	NA	3.930780985	0.090580555	0.076566473	45.5	NA	NA	Lethal	NA	1.0133	1.0385	158	NA	123.2	N	92	0	0	4	91	220	150	1	311	16	YES	DPN	407709	0.20323	0.066091954	2.73E-05	0.000122134	0.000131416	0.000207325	1	NA	0.042007001	36
YCR063W	BUD31;CWC14	chrIII	228318	228791	+	HT	860	30	474	29379	12184	41563	0	NO	TFIID	TATA-less	2	TAF1-enriched	-1	0.429914355	NA	NA	NA	NA	NA	NA	1.864838091	15	NA	NA	5.334852974	0.061839267	0.046613285	186.5	19.7	-0.403	Lethal	NA	0.7125	0.98185	NA	16	216	N	-38	4	0.004651163	4	11	152	49	114	206	-394	UNCLEAR	UNCLEAR	87829	0.35753	0.103448276	NA	NA	NA	4.34E-05	1	NA	0.076109937	36
YKL055C	OAR1	chrXI	335321	336157	-	HT	380	22	837	30297	16445	46742	0	NO	TFIID	TATA-containing	0	TAF1-enriched	-0.754716981	0.17365249	G+E	40.52592	0	6.994266	2.968444	0.008544331	0.275221173	14	NA	NA	5.14406787	0.037276263	0.037532673	NA	NA	NA	Lethal	NA	0.72067	NA	144	2	291	N	-28	2	0.005263158	2	168	66	196	38	162	-141	NO	OPN	330659	0.49459	0.048850575	NA	NA	NA	3.91E-05	2	NA	0.043062201	36
YNL196C	SLZ1	chrXIV	270275	271171	-	HT	352	17	897	20085	7181	27266	1	YES	TFIID	NA	NA	NA	-0.847222222	0.186902159	NA	NA	NA	NA	NA	NA	NA	NA	NA	NA	2.805033946	0.078877937	0.100124336	NA	NA	NA	Lethal	NA	1.01422	NA	NA	NA	182.1	N	NA	2	0.005681818	4	120	56	NA	NA	176	-131	NO	OPN	270275	0.58287	0.011494253	0.000160692	4.47E-05	7.14E-05	0.004638616	2	NA	0.040736607	36.5
YOR302W	YOR302W	chrXV	882765	882842	+	HT	493	47	78	46722	17162	63884	3	YES	SAGA	TATA-less	1	TAF1-depleted	NA	NA	NA	NA	NA	NA	NA	NA	0.637923567	17	1.176	0.330953	10.60293162	0.103882813	0.030398062	228.5	23.225	3.852	Lethal	NA	0.97738	1.00911	NA	3	197.6	N	-96	3	0.006085193	3	123	59	37	143	239	-314	YES	UNCLEAR	208449	0.58544	0.086206897	0.00283254	0.000109027	0.005121409	3.21E-05	1	NA	0.474025974	36.5
YPL264C	YPL264C	chrXVI	43283	44344	-	HT	207	19	1062	21735	7060	28795	0	NO	TFIID	NA	NA	NA	-0.843434343	0.326220219	NA	NA	NA	NA	NA	NA	0.293152677	14	NA	NA	6.28334817	0.039864997	0.031776404	NA	NA	NA	Lethal	NA	1.03476	0.97967	21	3	121.9	Y	NA	1	0.004830918	5	46	84	NA	NA	155	-159	NO	OPN	43283	0.37063	0.048850575	NA	NA	NA	0.00045561	2	NA	0.034401508	36.5
YIR028W	DAL4	chrIX	408468	410375	+	HH	826	34	1908	47679	19131	66810	1	YES	SAGA/TFIID	NA	NA	NA	-1.775119617	0.016508019	G+E	40.52592	0	6.994266	2.968444	0.008544331	0.093930887	14	NA	NA	4.172327628	0.145041606	0.091278374	NA	NA	NA	Lethal	NA	0.99448	NA	NA	NA	203.1	Y	NA	4	0.004842615	4	67	84	NA	NA	281	-337	YES	UNCLEAR	29513	1.6025	0.143678161	9.51E-05	4.69E-05	0.00018659	NA	3	NA	0.019402202	37
YLR377C	FBP1	chrXII	873746	874792	-	HT	944	34	1047	42636	23657	66293	1	YES	TFIID	NA	NA	NA	-2.04	0.288706623	NA	NA	NA	NA	NA	NA	1.532170556	14	NA	NA	3.492139123	0.133693636	0.104704134	NA	NA	NA	Lethal	NA	1.0042	NA	NA	NA	250	N	NA	3	0.003177966	3	33	141	NA	NA	174	-42	NO	OPN	203385	3.4493	0.048850575	0.000142836	7.74E-05	0.000249245	0.000445683	1	NA	0.035372849	37
YER187W	YER187W	chrV	566230	566655	+	HH	3605	19	426	18270	7605	25875	0	NO	TFIID	NA	NA	NA	NA	NA	G+E	40.52592	0	6.994266	2.968444	0.008544331	1.182998127	16	NA	NA	5.55075779	1.522509082	0.222293963	NA	NA	NA	Lethal	NA	1.0004	1.00829	NA	3	177.1	N	-702	19	0.005270458	3	119	195	207	2	172	-270	NO	OPN	10219	0.42936	0.043103448	NA	NA	NA	NA	1	NA	0.087058824	37
YPR002W	PDH1	chrXVI	558385	559935	+	HT	548	63	1551	65685	30023	95708	1	YES	SAGA	NA	NA	NA	-1.728862974	0.010916523	NA	NA	NA	NA	NA	NA	1.022310577	13	NA	NA	6.278091784	0.169604535	0.065598071	NA	NA	NA	Lethal	NA	1.02993	NA	NA	8	213	N	-106	3	0.005474453	5	77	91	15	154	169	-166	NO	OPN	388131	2.0572	0.002873563	0.001031152	2.46E-05	0.000133806	0.000340814	3	NA	0.024193548	37.5
YBR047W	FMP23	chrII	331833	332360	+	HH	322	35	528	40683	17605	58288	0	NO	NA	NA	NA	NA	-1.12987013	0.299856521	NA	NA	NA	NA	NA	NA	0.171412252	17	1.085	0.402091	6.279547313	0.15607237	0.062912171	NA	NA	NA	Lethal	NA	1.04045	0.99226	NA	9	173.6	N	-53	2	0.00621118	3	143	41	12	251	263	-116	YES	DPN	331833	1.0173	0.07183908	0.000154991	5.72E-05	3.63E-05	8.64E-05	1	NA	0.071157495	37.5
YDL085W	NDE2;NDH2	chrIV	303211	304848	+	HH	541	37	1638	43851	17772	61623	1	YES	TFIID	NA	NA	NA	-1.490118577	0.046542787	NA	NA	NA	NA	NA	NA	0.193985395	12	NA	NA	4.912238497	0.219231872	0.095317447	NA	NA	NA	Lethal	NA	1.02492	1.00324	NA	5	223.2	Y	NA	3	0.005545287	3	113	95	NA	NA	247	-330	YES	UNCLEAR	303211	1.8992	0.08045977	0.000172915	7.35E-05	0.000801765	2.00E-05	1	NA	0.022907758	37.5
YHR015W	MIP6	chrVIII	134554	136533	+	HT	1632	25	1980	32427	12022	44449	0	NO	TFIID	NA	NA	NA	-1.087542088	0.022369757	NA	NA	NA	NA	NA	NA	0.317830622	17	2.469	0.01091	3.689458608	0.106595155	0.088492424	NA	NA	NA	Lethal	NA	1.01173	NA	NA	NA	73	Y	-22	9	0.005514706	4	15	223	37	201	238	-60	YES	DPN	134554	0.3479	0.034482759	0.000139944	7.62E-05	7.14E-05	3.87E-05	1	NA	0.018948964	37.5
YNL336W	COS1	chrXIV	8330	9475	+	HH	2232	58	1146	54831	26543	81374	2	YES	TFIID	NA	NA	NA	NA	NA	G+E	40.52592	0	6.994266	2.968444	0.008544331	2.428996708	17	40.424	0	2.792406344	1.721722256	0.46989728	197.5	21.26	1.204	Lethal	NA	1.02697	NA	NA	NA	104.2	Y	-7	11	0.004928315	5	71	76	78	69	158	-285	NO	OPN	8330	0.22927	0.051724138	0.000136086	0.000129397	4.22E-05	0.000931461	2	NA	0.032751092	37.5
YHL018W	YHL018W	chrVIII	69708	70070	+	HH	160	21	363	24189	9849	34038	0	NO	TFIID	TATA-less	2	TAF1-enriched	0.648148148	0.198231058	NA	NA	NA	NA	NA	NA	0.303462289	16	NA	NA	4.859411295	0.097669049	0.064312415	NA	NA	NA	NA	NA	NA	NA	NA	NA	116.4	NA	-15	0	0	4	10	206	25	191	216	-65	UNCLEAR	UNCLEAR	69708	0.27269	NA	2.34E-05	9.53E-06	5.24E-06	1.70E-05	2	NA	0.104972376	38
YHR160C	PEX18	chrVIII	419221	420072	-	HT	301	29	852	43170	18614	61784	1	YES	TFIID	NA	NA	NA	-1.331088664	0.02351276	NA	NA	NA	NA	NA	NA	0.34067	5	NA	NA	4.232424954	0.63709494	0.18858746	NA	NA	NA	Lethal	NA	1.01244	NA	112	NA	182.3	N	NA	3	0.009966777	5	184	3	NA	NA	163	-78	NO	OPN	142571	1.5169	0.106321839	3.09E-05	1.49E-05	0.000105538	2.32E-06	3	NA	0.044653349	38
YDR252W	BTT1	chrIV	963412	963861	+	HT	306	12	450	13023	5671	18694	0	NO	TFIID	TATA-less	1	TAF1-enriched	-2	0.092868104	G+E	40.52592	0	6.994266	2.968444	0.008544331	0.628525217	17	4.599	7.10E-05	5.765882696	0.028249297	0.029149964	52.5	NA	NA	Lethal	NA	1.0112	NA	NA	21	130.6	Y	-2	1	0.003267974	3	29	230	31	228	259	-46	YES	DPN	568072	0.15171	0.08045977	5.07E-05	2.30E-05	3.33E-05	4.52E-05	3	NA	0.084632517	38
YDR286C	YDR286C	chrIV	1035231	1035575	-	HH	420	22	345	20622	10449	31071	0	NO	TFIID	NA	NA	NA	-1.159090909	0.315511806	NA	NA	NA	NA	NA	NA	0.303234731	17	3.979	0.000315	6.741185309	0.066039022	0.03812098	NA	NA	NA	Lethal	NA	1.01809	1.01573	NA	28	141.1	N	-230	2	0.004761905	4	28	157	73	36	185	-47	NO	OPN	496358	0.30711	0.025862069	1.55E-05	3.10E-05	2.11E-05	1.04E-05	2	NA	0.110465116	38
YBR147W	RTC2;YPQ3	chrII	536575	537465	+	HT	479	37	891	41337	15313	56650	3	YES	SAGA	NA	NA	NA	-0.086956522	0.854933519	NA	NA	NA	NA	NA	NA	1.156248168	12	NA	NA	7.42802963	0.077914872	0.03757825	NA	NA	NA	Lethal	NA	0.98671	1.00017	NA	4	225.1	Y	NA	2	0.004175365	4	71	109	NA	NA	226	-184	YES	UNCLEAR	275719	2.9596	0.051724138	0.000355357	0.000168245	0.000411677	0.000157881	2	NA	0.042696629	38
YNL146C-A	YNL146C-A	chrXIV	351386	351580	-	HH	135	8	195	4086	2676	6762	NA	NA	NA	TATA-less	1	TAF1-enriched	NA	NA	NA	NA	NA	NA	NA	NA	NA	NA	NA	NA	5.773998991	0.582607121	0.132193832	NA	NA	NA	Lethal	NA	NA	NA	NA	NA	227.6	N	-194	1	0.007407407	3	184	78	116	69	185	-153	NO	OPN	351386	NA	NA	7.52E-05	1.95E-05	6.19E-05	NA	NA	NA	0.198453608	38.5
YHR215W	PHO12	chrVIII	552099	553502	+	HH	600	114	1404	109350	57732	167082	2	YES	SAGA/TFIID	NA	NA	NA	NA	NA	G+E	40.52592	0	6.994266	2.968444	0.008544331	1.18804748	14	NA	NA	8.704391674	0.262687798	0.058881861	48.5	NA	NA	NA	NA	NA	NA	20	NA	199.5	NA	-40	3	0.005	4	74	94	114	54	232	-339	YES	UNCLEAR	9141	2.2197	NA	0.000143729	0.000100994	0.000191425	0.002079596	3	NA	0.027441197	38.5
YNL162W-A	YNL162W-A	chrXIV	330329	330547	+	HH	256	9	219	12891	5820	18711	0	NO	NA	TATA-less	2	TAF1-enriched	-2.125	0.164012642	NA	NA	NA	NA	NA	NA	0.072324588	17	1.052	0.430044	5.848003546	0.112090372	0.057250137	NA	NA	NA	Lethal	NA	NA	NA	NA	23	131.6	N	-25	2	0.0078125	4	154	8	17	199	216	-83	UNCLEAR	UNCLEAR	330329	NA	NA	0.000412911	0.00027921	0.002298489	5.44E-05	NA	NA	0.176605505	38.5
YDR018C	YDR018C;PZF396;YD9335.04C	chrIV	482670	483860	-	HT	303	27	1191	34344	13656	48000	0	NO	NA	NA	NA	NA	0.110192837	0.748162986	NA	NA	NA	NA	NA	NA	0.454606944	10	NA	NA	4.543774148	0.122257913	0.076952326	NA	NA	NA	Lethal	NA	1.0508	1.01296	NA	3	121.5	Y	-68	2	0.00660066	5	29	119	97	51	171	-353	NO	OPN	482670	1.2682	0.07183908	0.000110179	0.000306533	0.000207344	0.003734757	2	NA	0.032773109	39
YFL040W	YFL040W	chrVI	51350	52972	+	HT	343	27	1623	32373	12138	44511	0	NO	NA	NA	NA	NA	-3.901360544	1.71E-05	NA	NA	NA	NA	NA	NA	0.067367716	13	NA	NA	2.2359872	0.082317568	0.12831486	NA	NA	NA	Lethal	NA	0.994	1.02	17	NA	122.4	Y	NA	1	0.002915452	3	9	273	NA	NA	282	-66	YES	DPN	51350	0.37448	0.066091954	0.000101961	3.59E-05	0.000230187	8.70E-05	3	NA	0.024352651	39.5
YCR075W-A	YCR075W-A	chrIII	248975	249202	+	HH	160	1	228	1455	547	2002	NA	NA	NA	NA	NA	NA	-0.642857143	0.511675892	NA	NA	NA	NA	NA	NA	NA	NA	NA	NA	7.060746909	0.015164338	0.017440587	NA	NA	NA	Lethal	NA	NA	NA	NA	50	408.9	N	6	0	0	4	32	205	26	211	237	-43	YES	DPN	67418	NA	NA	0.000122856	5.88E-05	8.76E-05	NA	NA	NA	0.174008811	39.5
YOR177C	MPC54	chrXV	665785	667179	-	HT	681	22	1395	25119	13288	38407	1	YES	NA	NA	NA	NA	-1.079343365	0.064560759	NA	NA	NA	NA	NA	NA	0.285269444	9	NA	NA	3.469807289	0.131300033	0.104430429	NA	NA	NA	Lethal	NA	1.02636	1.03954	NA	NA	93.4	N	-53	3	0.004405286	3	118	53	0	0	281	-128	YES	DPN	424112	0.50698	0.031609195	5.14E-05	0.000139972	4.03E-05	5.20E-05	2	NA	0.028335725	39.5
YLR312C	YLR312C	chrXII	757637	758833	-	HH	647	51	1197	55377	22320	77697	0	NO	TFIID	NA	NA	NA	0.0296875	0.934781433	G+E	40.52592	0	6.994266	2.968444	0.008544331	0.156476942	14	NA	NA	6.076330304	0.122459452	0.057591021	NA	NA	NA	Lethal	NA	1.03264	1.06092	117	21	186.9	N	NA	1	0.001545595	1	216	61	NA	NA	NA	NA	NA	NA	319344	5.4391	0.189655172	0.000240037	0.000320646	0.000128371	NA	1	NA	0.033026756	39.5
YIR005W	IST3;SNU17	chrIX	364889	365335	+	HT	370	22	447	17673	8026	25699	0	NO	TFIID	NA	NA	NA	0.546875	0.468337089	G+E	40.52592	0	6.994266	2.968444	0.008544331	0.263677959	17	1.251	0.305023	6.384052717	0.026430085	0.025465535	NA	NA	NA	Lethal	NA	0.7933	NA	178	11	144.2	N	-45	1	0.002702703	3	28	197	73	152	225	-47	YES	DPN	74553	0.28057	0.068965517	0.000110266	2.38E-05	4.06E-05	3.29E-05	2	NA	0.089686099	40
YBR148W	YSW1	chrII	537876	539705	+	HT	411	30	1830	33300	12335	45635	0	NO	NA	NA	NA	NA	-0.518379595	0.110349806	G+E	40.52592	0	6.994266	2.968444	0.008544331	0.716872756	13	NA	NA	5.003597708	0.027347502	0.033050379	NA	NA	NA	Lethal	NA	0.99923	NA	NA	NA	203	N	-187	2	0.00486618	5	20	128	59	100	164	-497	NA	NA	273479	0.29246	0.054597701	0.000226873	7.79E-05	0.00034968	0.000331174	1	NA	0.022143248	40.5
YPL096C-A	ERI1;RIN1	chrXVI	366529	366735	-	HH	192	1	207	0	0	0	0	NA	NA	TATA-less	1	TAF1-enriched	0.694444444	0.281773615	NA	NA	NA	NA	NA	NA	0.067796132	17	0.897	0.580995	6.627715878	0.06767856	0.039251989	NA	NA	NA	Lethal	NA	NA	NA	129	31	185.9	N	-42	0	0	4	0	0	42	170	212	-75	UNCLEAR	UNCLEAR	366529	NA	NA	6.24E-05	5.18E-05	2.57E-05	4.91E-05	NA	NA	0.199029126	41
YGR109C	CLB6	chrVII	705359	706501	-	HH	7208	34	1143	37353	13889	51242	1	YES	TFIID	TATA-containing	0	TAF1-depleted	-1.26073132	0.037821269	NA	NA	NA	NA	NA	NA	0.037787842	14	NA	NA	5.346946289	0.037189304	0.036066434	NA	NA	NA	Lethal	NA	1.02262	NA	NA	6	177.3	Y	-79	42	0.005826859	4	96	64	15	170	250	-324	YES	UNCLEAR	384439	0.96216	0.020114943	0.000874642	0.001113669	0.007703747	2.86E-05	1	NA	0.035901926	41
YBR045C	GIP1	chrII	328173	330092	-	HT	415	27	1920	38484	11938	50422	0	NO	TFIID	NA	NA	NA	-1.413043478	0.002938996	NA	NA	NA	NA	NA	NA	1.244874403	17	5.683	3.80E-05	4.723153257	0.109188196	0.069960968	NA	NA	NA	Lethal	NA	1.02071	NA	26	1	212.2	N	NA	1	0.002409639	4	58	102	NA	NA	319	-177	YES	UNCLEAR	328173	0.5554	0.097701149	0.000299527	0.000116097	0.000170266	7.14E-05	3	NA	0.021625847	41.5
YKL086W	SRX1	chrXI	278281	278664	+	HH	418	33	384	24810	10975	35785	1	YES	NA	TATA-containing	0	TAF1-enriched	0.5	0.53290421	NA	NA	NA	NA	NA	NA	0.28520379	16	NA	NA	4.469756705	0.163842512	0.09055854	NA	NA	NA	Lethal	NA	1.01069	1.03759	NA	15	NA	N	-26	0	0	1	404	428	430	402	NA	NA	NA	NA	278281	0.1471	0.028735632	0.000174964	0.000123648	8.05E-05	1.21E-05	2	NA	0.108355091	41.5
YDR038C	ENA5	chrIV	527422	530697	-	HT	610	26	3276	33114	15481	48595	0	NO	TFIID	NA	NA	NA	NA	1	G+E	40.52592	0	6.994266	2.968444	0.008544331	5.707294843	17	14.337	0	4.436437728	1.313381998	0.258321848	NA	NA	NA	NA	NA	NA	NA	NA	NA	103.4	NA	-107	3	0.004918033	3	106	63	44	216	260	-138	YES	DPN	527422	0.18484	NA	2.75E-05	1.55E-05	1.42E-05	6.46E-05	2	NA	0.012824427	42
YJL216C	IMA5	chrX	24341	26086	-	HH	801	26	1746	25809	10071	35880	0	NO	NA	NA	NA	NA	NA	NA	NA	NA	NA	NA	NA	NA	0.413713839	8	NA	NA	3.374392142	0.655852821	0.239998012	NA	NA	NA	Lethal	NA	1.0191	0.96187	NA	1	229	Y	-151	4	0.004993758	3	12	159	163	8	313	-234	YES	UNCLEAR	24341	0.39991	0.054597701	2.29E-05	3.77E-05	1.52E-05	2.39E-05	3	NA	0.024068768	42
YNL211C	YNL211C;N1328	chrXIV	250055	250315	-	HH	616	32	261	27453	10225	37678	0	NO	TFIID	TATA-less	2	TAF1-enriched	-0.625	0.724623963	G+E	40.52592	0	6.994266	2.968444	0.008544331	0.053789753	17	1.202	0.312938	5.751433061	0.041379053	0.035368301	NA	NA	NA	Lethal	NA	1.02232	0.99577	NA	32	164.9	N	-65	3	0.00487013	3	169	3	62	208	270	-78	YES	DPN	250055	0.16702	0.028735632	1.15E-05	3.98E-05	3.04E-05	1.19E-05	3	NA	0.161538462	42
YGR153W	YGR153W;G6661	chrVII	796092	796745	+	HH	600	23	654	19569	7992	27561	0	NO	TFIID	NA	NA	NA	0.068870523	0.874006564	NA	NA	NA	NA	NA	NA	0.251992689	14	NA	NA	5.328734207	0.066335898	0.048333723	NA	NA	NA	Lethal	NA	1.03428	NA	NA	5	212.3	N	-21	3	0.005	3	151	8	13	170	306	-266	YES	UNCLEAR	294195	0.47323	0.00862069	0.000112219	0.000125779	0.000266501	0.001315896	1	NA	0.06431853	42
YCR101C	YCR101C	chrIII	302482	303030	-	HT	1331	16	549	19509	7534	27043	0	NO	SAGA	NA	NA	NA	NA	NA	NA	NA	NA	NA	NA	NA	0.121084899	17	1.946	0.046567	4.940606797	0.067780739	0.052695419	NA	NA	NA	Lethal	NA	1.0271	1.04382	NA	NA	311.8	Y	-4	7	0.005259204	4	47	136	51	132	212	-211	UNCLEAR	UNCLEAR	13590	0.27224	0.005747126	NA	NA	NA	8.07E-06	3	NA	0.076642336	42
YPL209C	IPL1	chrXVI	156490	157593	-	HH	249	26	1104	18525	7446	25971	0	NO	TFIID	TATA-containing	0	TAF1-enriched	-1.662721893	0.12104952	NA	NA	NA	NA	NA	NA	0.240654727	14	NA	NA	5.145997708	0.027128242	0.032006725	NA	NA	NA	Essential	Essential	0	NA	NA	3	144.3	Y	-67	1	0.004016064	4	150	13	54	201	255	-88	YES	DPN	156490	0.30349	0.020114943	NA	NA	NA	3.58E-05	2	NA	0.038077969	42
YBR201C-A	YBR201C-A	chrII	624493	624696	-	HH	1076	0	204	0	0	0	NA	NA	NA	TATA-containing	0	TAF1-enriched	0.266666667	0.748895175	NA	NA	NA	NA	NA	NA	NA	NA	NA	NA	5.349044405	0.259481185	0.095230647	NA	NA	NA	NA	NA	NA	NA	NA	NA	152.6	NA	-146	5	0.00464684	3	80	67	79	83	162	-142	NO	OPN	188488	NA	NA	0.000136965	9.97E-05	4.64E-05	NA	NA	NA	0.209359606	42.5
YFR035C	YFR035C	chrVI	226121	226465	-	HH	498	43	345	36930	16517	53447	0	NO	TFIID	TATA-containing	0	TAF1-enriched	NA	NA	NA	NA	NA	NA	NA	NA	0.167640038	14	NA	NA	2.881261476	0.122321971	0.121386269	NA	NA	NA	Lethal	NA	1.02049	1.00799	NA	2	113.9	N	NA	2	0.004016064	2	170	5	NA	NA	420	-80	YES	DPN	43696	0.20037	0.011494253	0.000598124	0.000289116	0.001861867	8.82E-06	1	NA	0.123546512	42.5
YER096W	SHC1	chrV	351698	353236	+	HT	516	35	1539	37671	20155	57826	0	NO	TFIID	NA	NA	NA	-1.812030075	0.001143292	NA	NA	NA	NA	NA	NA	0.119870738	14	NA	NA	5.337707402	0.247150296	0.093137763	NA	NA	NA	Lethal	NA	1.00321	NA	18	5	290.4	Y	NA	2	0.003875969	3	144	105	NA	NA	264	-180	YES	UNCLEAR	223638	1.1262	0.028735632	0.000110049	2.53E-05	0.000951513	6.26E-06	2	NA	0.027958388	43
YNR064C	YNR064C;N3535	chrXIV	749136	750008	-	HT	342	30	873	35184	14296	49480	1	YES	TFIID	NA	NA	NA	NA	NA	NA	NA	NA	NA	NA	NA	0.029884526	17	1.022	0.457652	3.463445971	0.314234635	0.161852201	NA	NA	NA	Lethal	NA	1.00764	1.02003	NA	NA	152.7	N	NA	2	0.005847953	3	162	63	NA	NA	215	-290	UNCLEAR	UNCLEAR	34325	1.0456	0.040229885	0.000156749	3.58E-05	1.93E-05	0.000325234	2	NA	0.049311927	43
YGR016W	YGR016W	chrVII	522261	522833	+	HH	185	16	573	18039	7263	25302	0	NO	TFIID	TATA-less	2	TAF1-enriched	0.522807018	0.22342567	NA	NA	NA	NA	NA	NA	0.285174575	17	2.854	0.006505	5.2879827	0.037406836	0.036575095	NA	NA	NA	Lethal	NA	0	1.01431	NA	19	100.1	N	-23	0	0	3	35	206	58	183	241	-40	YES	DPN	522261	0.15345	0.020114943	NA	NA	NA	2.65E-05	3	NA	0.075174825	43
YOL114C	YOL114C;HRE202	chrXV	103317	103925	-	HH	401	24	609	24009	12017	36026	0	NO	TFIID	TATA-less	1	TAF1-enriched	0.187969925	0.729506491	NA	NA	NA	NA	NA	NA	0.474033271	12	NA	NA	4.571346128	0.05650913	0.05200142	NA	NA	NA	Lethal	NA	1.00598	0.99188	NA	9	178	N	-12	2	0.004987531	3	113	46	125	34	268	-121	YES	DPN	103317	0.10669	0.040229885	2.76E-05	1.68E-05	6.70E-05	8.40E-05	2	NA	0.071546053	43.5
YPR001W	CIT3	chrXVI	556377	557837	+	HT	648	40	1461	51195	20081	71276	0	NO	TFIID	NA	NA	NA	NA	NA	NA	NA	NA	NA	NA	NA	0.134266667	6	NA	NA	4.089606294	0.17281539	0.101650544	NA	NA	NA	Lethal	NA	1.02869	NA	27	4	158.2	Y	NA	4	0.00617284	5	48	88	NA	NA	183	-285	NO	OPN	390229	2.2518	0.086206897	NA	NA	NA	5.32E-05	3	NA	0.029794521	43.5
YLR315W	NKP2	chrXII	764808	765269	+	HH	671	19	462	23919	9527	33446	0	NO	TFIID	TATA-less	2	TAF1-enriched	-0.559782609	0.44496787	NA	NA	NA	NA	NA	NA	0.408277684	14	NA	NA	5.689804377	0.036794363	0.033712683	54	NA	NA	Lethal	NA	0.98036	1.04463	NA	29	309.6	N	-54	4	0.005961252	4	11	175	65	121	186	-64	NO	OPN	312908	0.2454	0.126436782	4.81E-05	1.27E-05	2.67E-05	NA	1	NA	0.095444685	44
YML087C	AIM33	chrXIII	94431	95369	-	HT	422	36	939	36318	27722	64040	3	YES	TFIID	TATA-less	2	TAF1-depleted	-1.388235294	0.051012554	G+E	40.52592	0	6.994266	2.968444	0.008544331	0.550091751	17	2.643	0.006504	5.390643283	0.071068237	0.049453516	NA	NA	NA	Lethal	NA	1.02275	0.97558	67	9	109.2	Y	-10	2	0.004739336	4	91	66	101	56	325	-141	YES	DPN	94431	1.1007	0.057471264	NA	NA	NA	0.001291695	2	NA	0.046908316	44
YEL077C	YEL077C	chrV	264	4097	-	HT	88	17	3834	27363	12016	39379	0	NO	TFIID	NA	NA	NA	NA	NA	G+E	40.52592	0	6.994266	2.968444	0.008544331	0.792720182	17	19.148	0	1.743928215	0.491840028	0.402145609	NA	NA	NA	NA	NA	NA	NA	NA	NA	83	NA	NA	0	0	4	15	148	NA	NA	194	-395	NO	OPN	264	0.24583	NA	6.26E-05	0.000227388	0.000168234	8.63E-05	1	NA	0.011609705	44.5
YBL043W	ECM13	chrII	136688	137461	+	HT	322	53	774	65037	28123	93160	3	YES	SAGA	NA	NA	NA	-3.4	0.000557648	NA	NA	NA	NA	NA	NA	0.764768203	16	NA	NA	6.299152495	0.061920686	0.039503517	NA	NA	NA	Lethal	NA	1.01541	NA	NA	3	182.6	N	-133	1	0.00310559	2	15	145	148	12	160	-60	NO	OPN	136688	1.8865	0.025862069	NA	NA	NA	0.000767414	1	NA	0.057567917	44.5
YNR057C	BIO4	chrXIV	733356	734069	-	HH	222	16	714	22626	8993	31619	2	YES	TFIID	NA	NA	NA	-5.25	0.009102644	NA	NA	NA	NA	NA	NA	0.391374053	17	6.421	6.00E-06	5.43366491	0.092510919	0.05597623	NA	NA	NA	Lethal	NA	1.0185	NA	NA	3	190	N	238	1	0.004504505	4	37	137	37	201	174	-38	NO	OPN	50264	0.46712	0.103448276	NA	NA	NA	0.000104036	3	NA	0.062412342	44.5
YNR058W	BIO3	chrXIV	734291	735733	+	HH	222	33	1443	39168	16636	55804	2	YES	TFIID	NA	NA	NA	-1.835087719	0.009595098	G+E	40.52592	0	6.994266	2.968444	0.008544331	0.249546944	10	NA	NA	5.183264396	0.092062702	0.058538083	NA	NA	NA	Lethal	NA	1.03095	NA	NA	1	140.4	Y	-80	1	0.004504505	4	79	85	159	5	238	-334	YES	UNCLEAR	48600	0.36673	0.031609195	NA	NA	NA	4.86E-05	2	NA	0.030859917	44.5
YOR376W-A	YOR376W-A	chrXV	1045196	1045351	+	HH	2154	5	156	6861	3126	9987	NA	NA	NA	NA	NA	NA	NA	NA	NA	NA	NA	NA	NA	NA	NA	NA	NA	NA	6.32025187	0.043647153	0.033055488	NA	NA	NA	Lethal	NA	NA	NA	NA	12	159.8	N	NA	9	0.004178273	4	62	113	NA	NA	175	-13	NO	OPN	45940	NA	NA	6.23E-05	0.000111241	0.00015478	NA	NA	NA	0.290322581	45
YEL057C	YEL057C	chrV	45020	45721	-	HH	1447	26	702	26829	11937	38766	1	YES	TFIID	NA	NA	NA	-0.88172043	0.163649886	NA	NA	NA	NA	NA	NA	0.843380051	16	NA	NA	4.457084508	0.526556706	0.162806487	NA	NA	NA	Lethal	NA	1.03434	0.98796	185	41	86.9	N	-313	9	0.006219765	4	182	59	89	24	198	-412	NA	NA	45020	0.36807	0.066091954	0.000149351	2.14E-05	0.000151181	8.81E-05	1	NA	0.064907275	45.5
YHR044C	DOG1	chrVIII	194068	194808	-	HH	743	28	741	28350	10915	39265	0	NO	TFIID	NA	NA	NA	-0.076363636	0.907114192	G+E	40.52592	0	6.994266	2.968444	0.008544331	0.1928599	17	3.712	0.000365	5.272847583	0.071344138	0.050656354	NA	NA	NA	Lethal	NA	1.03513	NA	44	35	133	Y	-17	4	0.00538358	3	120	37	137	20	204	-112	NO	OPN	194068	0.40811	0.028735632	0.000264505	4.53E-05	0.000153531	0.000599339	2	NA	0.061486486	45.5
YFL055W	AGP3	chrVI	17004	18680	+	HH	1573	35	1677	33792	15410	49202	0	NO	TFIID	NA	NA	NA	NA	NA	NA	NA	NA	NA	NA	NA	1.386121528	9	NA	NA	4.807240994	0.637113236	0.166039883	NA	NA	NA	Lethal	NA	1.02212	NA	NA	3	127.7	Y	-322	9	0.005721551	4	46	115	48	232	280	-349	YES	UNCLEAR	17004	0.9104	0.077586207	0.000123056	7.53E-05	0.000118845	0.000101589	3	NA	0.027147971	45.5
YEL072W	RMD6	chrV	13720	14415	+	HH	6167	34	696	32286	22521	54807	0	NO	TFIID	TATA-less	1	TAF1-enriched	NA	NA	G+E	40.52592	0	6.994266	2.968444	0.008544331	0.891878428	15	NA	NA	7.076646196	0.031055624	0.024902483	NA	NA	NA	Lethal	NA	1.00509	0.97637	NA	12	98.6	N	-120	36	0.005837522	5	78	74	46	91	199	-286	NO	OPN	13720	0.79172	0.040229885	0.000236254	0.000163575	0.000318647	1.68E-05	2	NA	0.065467626	45.5
YFL053W	DAK2	chrVI	23423	25198	+	HH	636	28	1776	36828	18128	54956	1	YES	NA	NA	NA	NA	NA	NA	NA	NA	NA	NA	NA	NA	NA	1	NA	NA	4.874906552	1.642694742	0.262913047	NA	NA	NA	Lethal	NA	1.01178	NA	NA	NA	234.1	Y	NA	3	0.004716981	3	55	114	NA	NA	169	NA	NA	NA	23423	1.2323	0.08045977	0.00111921	0.004348739	0.000458853	0.000263155	1	NA	0.025633803	45.5
YAR033W	MST28	chrI	188107	188811	+	HT	375	32	705	26511	11000	37511	0	NO	TFIID	TATA-less	2	TAF1-enriched	NA	NA	NA	NA	NA	NA	NA	NA	2.426668724	15	NA	NA	2.771184767	0.584111606	0.275792489	NA	NA	NA	NA	NA	NA	NA	NA	NA	123.1	NA	-42	2	0.005333333	3	160	10	32	225	257	-85	YES	DPN	41407	0.1588	NA	NA	NA	NA	0.000840237	1	NA	0.064630682	45.5
YGL184C	STR3	chrVII	154615	156012	-	HT	531	52	1398	47670	20331	68001	0	NO	SAGA	NA	NA	NA	-5.363636364	3.44E-05	G+E	40.52592	0	6.994266	2.968444	0.008544331	0.913684206	15	NA	NA	6.53540373	0.140694487	0.05739395	NA	NA	NA	Lethal	NA	NA	NA	37	NA	115.8	Y	NA	2	0.003766478	4	76	88	NA	NA	295	-322	YES	UNCLEAR	154615	1.4851	NA	NA	NA	NA	3.67E-05	2	NA	0.032569792	45.5
YKR097W	PCK1;PEPC;PPC1	chrXI	631152	632801	+	HT	772	49	1650	54783	23750	78533	1	YES	TFIID	NA	NA	NA	-3.032608696	0.028298966	NA	NA	NA	NA	NA	NA	4.055707778	10	NA	NA	4.467444418	0.138317282	0.083249008	NA	NA	NA	Lethal	NA	1.01604	NA	141	8	282.5	N	NA	5	0.006476684	4	132	18	NA	NA	189	-93	NO	OPN	34015	5.7644	0.060344828	NA	NA	NA	0.000405161	1	NA	0.02759248	45.5
YPL189W	GUP2	chrXVI	189154	190983	+	HH	641	59	1830	60975	29313	90288	0	NO	TFIID	NA	NA	NA	-1.37768595	0.012503836	NA	NA	NA	NA	NA	NA	0.147565135	14	NA	NA	4.483300191	0.049740622	0.049745957	NA	NA	NA	Lethal	NA	0.98633	NA	NA	7	162.6	Y	-131	3	0.004680187	4	5	176	136	45	306	-358	YES	UNCLEAR	189154	0.44421	0.100574713	6.78E-05	4.63E-05	0.000637656	6.95E-05	3	NA	0.025150355	46
YBL059W	YBL059W;YBL0508;YBL0516	chrII	110594	111244	+	HH	55	44	582	44970	20408	65378	0	NO	TFIID	TATA-less	2	TAF1-depleted	-0.80952381	0.213644985	NA	NA	NA	NA	NA	NA	0.213639739	17	2.377	0.018081	6.418140791	0.025566954	0.024913243	NA	NA	NA	Lethal	NA	0.98287	1.00071	NA	NA	206.5	N	80	0	0	4	144	76	64	156	183	-151	NO	OPN	110594	0.28471	0.025862069	6.03E-05	6.67E-05	3.64E-05	8.99E-05	2	NA	0.070769231	46
YHR184W	SSP1	chrVIII	472744	474459	+	HT	315	26	1716	28434	15483	43917	0	NO	TFIID	NA	NA	NA	-2.136792453	0.002110921	NA	NA	NA	NA	NA	NA	0.733676263	16	NA	NA	3.183946273	0.138297672	0.116799694	NA	NA	NA	Lethal	NA	1.01568	NA	NA	NA	205.8	N	NA	1	0.003174603	3	0	0	NA	NA	250	-301	YES	UNCLEAR	88184	0.28142	0.063218391	0.000241333	0.00025799	0.000266278	7.20E-05	2	NA	0.026822157	46
YCR010C	ADY2;ATO1	chrIII	132273	133124	-	HT	600	54	852	60921	26658	87579	1	YES	TFIID	NA	NA	NA	NA	1	NA	NA	NA	NA	NA	NA	2.098911111	10	NA	NA	4.023278159	0.165082789	0.100988248	NA	NA	NA	Lethal	NA	1.02297	NA	NA	4	224.4	Y	NA	1	0.001666667	2	43	106	NA	NA	149	-32	NO	OPN	132273	3.4376	0.07183908	0.000120973	8.92E-06	9.84E-05	0.000189508	2	NA	0.054641598	46.5
YGL146C	RRT6	chrVII	228751	229686	-	HH	557	24	936	30018	9636	39654	0	NO	NA	TATA-less	2	TAF1-enriched	0.59826087	0.041993889	NA	NA	NA	NA	NA	NA	0.042326185	17	1.699	0.083425	5.664306422	0.079042027	0.049634345	NA	NA	NA	Lethal	NA	1.01573	0.99301	NA	9	111.8	N	-159	2	0.003590664	3	37	123	36	385	421	-198	YES	UNCLEAR	228751	0.66038	0.005747126	9.93E-05	5.99E-05	7.64E-05	2.30E-05	2	NA	0.04973262	46.5
YGR256W	GND2	chrVII	1004624	1006102	+	HH	662	43	1479	53091	20148	73239	3	YES	SAGA	NA	NA	NA	-3.653658537	0.000284589	G+E	40.52592	0	6.994266	2.968444	0.008544331	0.077687424	17	0.483	0.943628	7.164052793	0.557794761	0.10425057	NA	NA	NA	Lethal	NA	1.01255	NA	NA	9	121.6	Y	-58	4	0.006042296	4	16	154	74	96	171	-229	NO	OPN	84838	1.6839	0.083333333	0.002245355	0.000133844	0.00202886	2.19E-05	1	NA	0.031461434	46.5
YGL170C	SPO74	chrVII	184153	185394	-	HH	665	10	1242	18714	7255	25969	0	NO	TFIID	NA	NA	NA	-1.858126722	0.006218407	NA	NA	NA	NA	NA	NA	NA	1	NA	NA	3.613900766	0.233314961	0.133658035	NA	NA	NA	Lethal	NA	1.02475	0.9789	NA	NA	135.4	N	NA	3	0.004511278	2	167	23	NA	NA	188	-98	NO	OPN	184153	0.35704	0	0.000155642	0.000164132	0.000830704	2.33E-05	2	NA	0.037469782	46.5
YGR131W	FHN1	chrVII	754726	755250	+	HH	882	40	525	43275	18679	61954	0	NO	TFIID	TATA-less	2	TAF1-enriched	-0.333333333	0.683670329	NA	NA	NA	NA	NA	NA	0.127896848	17	2.545	0.007801	4.667264369	0.06488445	0.054576781	NA	NA	NA	Lethal	NA	1.00797	1.01559	NA	2	210.1	Y	-121	3	0.003401361	4	31	157	152	36	191	-232	NO	OPN	335690	0.46537	0.034482759	0.000104905	5.28E-05	4.45E-05	3.09E-05	3	NA	0.089694656	47
YDR009W	GAL3	chrIV	463434	464996	+	HT	918	32	1563	35094	13881	48975	3	YES	NA	NA	NA	NA	-11.58666667	2.35E-11	NA	NA	NA	NA	NA	NA	0.345524167	6	NA	NA	4.916934444	0.177410521	0.085663392	NA	NA	NA	Lethal	NA	1.01846	NA	20	200	100.3	Y	NA	5	0.005446623	4	11	210	NA	NA	221	-64	UNCLEAR	UNCLEAR	463434	0.91072	0.031609195	0.000176353	8.63E-05	4.42E-05	9.89E-05	2	NA	0.030089629	47
YNL195C	YNL195C;N1390	chrXIV	271523	272308	-	HT	402	48	786	55479	28553	84032	3	YES	SAGA	TATA-less	2	TAF1-enriched	-2.573214286	0.002249597	NA	NA	NA	NA	NA	NA	3.474216667	6	NA	NA	5.746993689	0.581683419	0.132709686	NA	NA	NA	Lethal	NA	1.01926	0.9816	NA	NA	132.1	N	258	3	0.007462687	4	187	36	96	71	212	-434	NA	NA	271523	3.5249	0.051724138	8.37E-05	0.000161925	0.000528823	0.000286115	1	NA	0.059872611	47
YCR105W	ADH7	chrIII	309070	310155	+	HT	895	49	1086	54549	26142	80691	2	YES	SAGA/TFIID	NA	NA	NA	NA	NA	NA	NA	NA	NA	NA	NA	0.441636818	11	NA	NA	4.162931775	0.246377106	0.119234211	NA	NA	NA	Lethal	NA	1.01966	1.00422	NA	NA	314.5	Y	NA	5	0.005586592	4	86	76	NA	NA	259	-330	YES	UNCLEAR	6465	0.32267	0.002873563	NA	NA	NA	0.000584947	2	NA	0.043317972	47
YHR175W-A	YHR175W-A	chrVIII	453558	453707	+	HT	117	0	150	0	0	0	NA	NA	NA	NA	NA	NA	NA	NA	NA	NA	NA	NA	NA	NA	NA	NA	NA	NA	7.673285024	0.044468813	0.02748188	NA	NA	NA	Lethal	NA	NA	NA	NA	9	176.2	N	NA	0	0	4	18	141	NA	NA	159	-57	NO	OPN	108936	NA	NA	NA	NA	NA	NA	NA	NA	0.315436242	47
YER046W	SPO73	chrV	243180	243611	+	HH	1679	35	432	38289	19787	58076	0	NO	TFIID	NA	NA	NA	-0.066666667	0.932413561	NA	NA	NA	NA	NA	NA	0.158729388	17	2.375	0.013574	7.115605976	0.050654455	0.031629835	NA	NA	NA	Lethal	NA	1.01621	0.97744	NA	32	80.7	N	-14	8	0.004764741	4	82	60	96	46	293	-269	YES	UNCLEAR	243180	0.32284	0.034482759	0.000274995	2.31E-05	4.13E-05	6.84E-05	1	NA	0.110208817	47.5
YPR201W	ARR3;ACR3	chrXVI	939922	941136	+	HH	251	27	1215	25977	13179	39156	0	NO	TFIID	NA	NA	NA	NA	NA	NA	NA	NA	NA	NA	NA	1.337765778	14	NA	NA	3.563043147	0.90987246	0.267712826	NA	NA	NA	Lethal	NA	1.01609	NA	NA	1	227.9	N	-65	2	0.007968127	3	134	34	31	139	170	-109	NO	OPN	6930	0.48595	0.066091954	0.000151766	0.000101113	0.000127989	0.000524811	1	NA	0.039126853	47.5
YNR068C	YNR068C;N3551	chrXIV	760067	760885	-	HT	238	33	819	44805	16969	61774	0	NO	TFIID	NA	NA	NA	0.592592593	0.142381028	G+E	40.52592	0	6.994266	2.968444	0.008544331	1.500587228	12	NA	NA	6.306943158	0.110712564	0.052756933	NA	NA	NA	Lethal	NA	0.99052	1.03316	NA	NA	164.4	Y	-167	1	0.004201681	4	53	62	105	93	198	-137	NO	OPN	23448	1.5357	0.066091954	0.000253902	0.000204223	0.00020238	0.000100543	3	NA	0.05806846	47.5
YDR079C-A	TFB5	chrIV	603593	603811	-	HH	197	2	219	0	0	0	0	NO	NA	NA	NA	NA	-2.75	0.395058632	NA	NA	NA	NA	NA	NA	0.078014313	17	1.559	0.12262	7.373728062	0.039265637	0.026873189	NA	NA	NA	Lethal	NA	NA	NA	NA	118	174	N	-34	1	0.005076142	4	3	191	37	157	194	-72	NO	OPN	603593	NA	NA	NA	NA	NA	2.37E-05	NA	NA	0.217889908	47.5
YIL089W	YIL089W	chrIX	195599	196216	+	HT	529	21	618	27609	14417	42026	0	NO	TFIID	NA	NA	NA	0.25	0.558898473	G+E	40.52592	0	6.994266	2.968444	0.008544331	1.26392	11	NA	NA	5.995941879	0.222703097	0.078705614	NA	NA	NA	Lethal	NA	1.00216	0.97196	NA	3	121.7	Y	-34	2	0.003780718	4	5	220	39	186	225	-70	YES	DPN	195599	0.47119	0.045977011	3.27E-05	1.92E-05	4.69E-05	8.37E-06	2	NA	0.077795786	48
YDR522C	SPS2	chrIV	1483795	1485303	-	HT	263	33	1509	49692	23732	73424	0	NO	TFIID	NA	NA	NA	-0.61784897	0.226920521	NA	NA	NA	NA	NA	NA	0.330645833	10	NA	NA	2.405172349	0.089393676	0.124310323	NA	NA	NA	Lethal	NA	0.72992	NA	81	NA	113.6	Y	NA	1	0.003802281	4	72	188	NA	NA	260	-3	YES	DPN	46630	0.151	0.025862069	0.00010022	6.79E-05	8.25E-05	0.006084835	3	NA	0.031830239	48
YNL097C-B	YNL097C-B;YNL097C-A	chrXIV	440797	440919	-	HT	447	10	123	10122	3568	13690	NA	NA	NA	NA	NA	NA	NA	NA	NA	NA	NA	NA	NA	NA	NA	NA	NA	NA	5.55424631	0.13559805	0.066298177	NA	NA	NA	NA	NA	NA	NA	NA	NA	136.7	NA	7	0	0	0	235	692	228	699	NA	NA	NA	NA	343414	NA	NA	0.00014049	0.000108759	0.000652296	NA	NA	NA	0.393442623	48
YGR204C-A	YGR204C-A	chrVII	909061	909174	-	HH	39	2	114	3231	2991	6222	NA	NA	NA	NA	NA	NA	NA	NA	NA	NA	NA	NA	NA	NA	NA	NA	NA	NA	NA	NA	NA	NA	NA	NA	Lethal	NA	NA	NA	NA	NA	130.7	N	NA	0	0	5	26	142	NA	NA	168	-49	NO	OPN	181766	NA	NA	NA	NA	NA	NA	NA	NA	0.424778761	48
YDL214C	PRR2	chrIV	74446	76545	-	HT	744	36	2100	50589	21647	72236	0	NO	TFIID	NA	NA	NA	-0.522912886	0.091632129	G+E	40.52592	0	6.994266	2.968444	0.008544331	0.274469304	14	NA	NA	4.816511676	0.071304706	0.055440416	NA	NA	NA	Lethal	NA	1.02184	1.01743	NA	1	333.7	Y	NA	2	0.002688172	2	148	23	NA	NA	122	-98	NO	OPN	74446	1.9032	0.051724138	0.000315902	7.39E-05	0.000200498	5.14E-06	3	NA	0.023106241	48.5
YDR379C-A	YDR379C-A;smORF139;smORF8	chrIV	1233278	1233517	-	HH	701	11	240	16869	5551	22420	0	NO	NA	NA	NA	NA	-2.6	0.1846977	NA	NA	NA	NA	NA	NA	0.694675359	17	2.608	0.007159	7.286647362	0.090195587	0.04121591	NA	NA	NA	Lethal	NA	NA	NA	NA	41	117	N	-30	2	0.002853067	3	48	101	78	71	149	-27	NO	OPN	298416	NA	NA	2.70E-05	5.31E-05	2.80E-05	9.61E-05	NA	NA	0.205020921	49
YBR013C	YBR013C;YBR0209	chrII	265492	265881	-	HT	844	21	390	22968	9820	32788	2	YES	TFIID	NA	NA	NA	NA	NA	NA	NA	NA	NA	NA	NA	0.469973655	17	2.763	0.008594	5.932825865	0.096651209	0.052401298	NA	NA	NA	Lethal	NA	1.01741	1.01146	NA	NA	202.2	N	-142	5	0.005924171	4	37	116	26	166	192	-191	NO	OPN	265492	0.2663	0.037356322	6.74E-05	7.62E-05	5.19E-05	0.000808286	2	NA	0.12596401	49
YOR389W	YOR389W	chrXV	1074213	1076087	+	HH	1290	56	1875	64515	29579	94094	0	NO	TFIID	NA	NA	NA	NA	NA	G+E	40.52592	0	6.994266	2.968444	0.008544331	0.640923092	14	NA	NA	5.257381918	0.261471549	0.097261887	NA	NA	NA	NA	NA	NA	NA	NA	NA	143.4	NA	-47	8	0.00620155	4	166	27	20	132	191	-379	NO	OPN	15204	0.62794	NA	4.18E-05	8.01E-05	5.13E-05	5.67E-05	3	NA	0.026147279	49
YJR154W	YJR154W;J2240	chrX	725784	726824	+	HT	1884	22	1041	29883	12816	42699	1	YES	SAGA	NA	NA	NA	NA	NA	NA	NA	NA	NA	NA	NA	0.705502778	9	NA	NA	5.176299094	0.42801878	0.126389807	NA	NA	NA	Lethal	NA	1.02711	0.98949	NA	NA	275.3	N	-207	11	0.005838641	3	136	23	30	265	295	-252	YES	UNCLEAR	18927	0.30693	0.031609195	0.01503633	8.86E-05	0.000254113	4.98E-05	2	NA	0.047115385	49
YAL037W	YAL037W	chrI	74020	74823	+	HH	502	27	804	24825	12523	37348	3	YES	SAGA	NA	NA	NA	-0.441441441	0.332968045	G+E	40.52592	0	6.994266	2.968444	0.008544331	0.21936121	14	NA	NA	5.216233055	0.044289761	0.040345461	NA	NA	NA	Lethal	NA	1.00277	0.97426	NA	7	108.1	N	NA	3	0.005976096	4	36	182	NA	NA	218	-39	UNCLEAR	UNCLEAR	74020	0.44966	0.066091954	0.000144268	9.59E-05	0.000111225	4.45E-05	1	NA	0.061021171	49
YLR460C	YLR460C;L9122.7	chrXII	1059757	1060887	-	HH	2032	52	1131	48537	23313	71850	0	NO	TFIID	NA	NA	NA	NA	NA	NA	NA	NA	NA	NA	NA	1.368758742	13	NA	NA	3.197520833	1.196240726	0.342054973	NA	NA	NA	Lethal	NA	1.02058	1.02515	NA	1	112.9	Y	-195	12	0.005905512	3	31	158	37	264	301	-233	YES	UNCLEAR	17290	0.96061	0.057471264	0.009634841	4.61E-05	0.00084352	0.000157594	1	NA	0.04380531	49.5
YDR191W	HST4	chrIV	842337	843449	+	HH	342	23	1113	28896	7896	36792	0	NO	TFIID	TATA-less	2	TAF1-enriched	-3.368421053	0.000196949	G+E	40.52592	0	6.994266	2.968444	0.008544331	0.117749956	17	2.255	0.023518	5.667596049	0.035077118	0.033045556	NA	NA	NA	Lethal	NA	1.01767	NA	38	8	167.4	Y	-38	3	0.00877193	4	171	19	19	129	172	-405	NA	NA	688484	0.2459	0.002873563	8.64E-05	5.93E-05	0.000136429	1.51E-05	1	NA	0.044514388	49.5
YLR174W	IDP2	chrXII	504591	505829	+	HT	344	60	1239	75057	25951	101008	2	YES	SAGA	NA	NA	NA	-2.833333333	0.047252551	NA	NA	NA	NA	NA	NA	0.270972673	14	NA	NA	5.944566157	0.150119335	0.065177568	NA	NA	NA	Lethal	NA	1.00211	NA	NA	6	223.9	Y	NA	2	0.005813953	2	160	3	NA	NA	161	-78	NO	OPN	504591	3.1465	0.051724138	8.59E-05	0.000128944	0.000136244	0.000705561	2	NA	0.039983845	49.5
YGL081W	YGL081W	chrVII	357377	358339	+	HT	405	15	963	19776	8739	28515	0	NO	TFIID	NA	NA	NA	0.33984375	0.308482682	NA	NA	NA	NA	NA	NA	0.253694444	9	NA	NA	4.153569084	0.11505232	0.081663173	NA	NA	NA	Lethal	NA	1.00722	NA	NA	6	108	N	NA	2	0.004938272	4	115	46	NA	NA	244	-121	YES	DPN	357377	0.54978	0	NA	NA	NA	6.72E-06	1	NA	0.051455301	49.5
YGR230W	BNS1	chrVII	951894	952307	+	HH	995	21	414	25806	9576	35382	0	NO	TFIID	TATA-less	1	TAF1-enriched	-0.206349206	0.666840316	NA	NA	NA	NA	NA	NA	0.102306947	17	1.481	0.153733	5.971651306	0.089994875	0.05023593	NA	NA	NA	Lethal	NA	1.02218	NA	32	45	240.7	N	138	5	0.005025126	3	69	121	101	69	364	-196	YES	UNCLEAR	138633	0.4379	0.017241379	NA	NA	NA	4.73E-05	1	NA	0.119854722	49.5
YLR376C	PSY3	chrXII	872826	873554	-	HT	192	17	729	13797	6344	20141	2	YES	TFIID	NA	NA	NA	-0.264367816	0.64779602	NA	NA	NA	NA	NA	NA	0.179871076	15	NA	NA	5.355887395	0.076137693	0.051519118	NA	NA	NA	Lethal	NA	1.02032	1.01187	24	15	278.4	N	-47	1	0.005208333	4	158	13	34	218	252	-88	YES	DPN	204623	0.27983	0.060344828	2.64E-05	4.09E-05	4.49E-05	6.11E-06	1	NA	0.068681319	50
YDR536W	STL1	chrIV	1508005	1509714	+	HH	3105	48	1710	52683	24037	76720	2	YES	TFIID	NA	NA	NA	NA	NA	NA	NA	NA	NA	NA	NA	1.121296667	6	NA	NA	3.304143729	1.311123832	0.346547624	NA	NA	NA	Lethal	NA	1.01118	NA	61	7	127.3	Y	NA	15	0.004830918	3	84	58	NA	NA	157	-133	NO	OPN	22219	2.5678	0.057471264	3.64E-05	6.66E-05	1.31E-05	4.05E-05	3	NA	0.029256875	50
YDL211C	YDL211C;D1026	chrIV	79294	80412	-	HH	3858	38	1119	49686	20974	70660	0	NO	TFIID	NA	NA	NA	-0.494505495	0.192904601	NA	NA	NA	NA	NA	NA	0.229602448	15	NA	NA	5.579549241	0.014553372	0.021621345	NA	NA	NA	Lethal	NA	1.01126	0.98249	NA	5	130.7	N	-33	22	0.005702436	3	134	23	10	266	276	-98	YES	DPN	79294	1.868	0.181034483	0.000504233	0.000448974	0.000610689	2.08E-05	3	NA	0.044722719	50
YER180C-A	SLO1	chrV	550865	551122	-	HH	1403	1	258	2067	558	2625	NA	NA	NA	TATA-less	1	TAF1-enriched	-0.217391304	0.749973419	NA	NA	NA	NA	NA	NA	NA	NA	NA	NA	6.464884235	0.025710335	0.024802366	NA	NA	NA	Lethal	NA	NA	NA	41	4	116.7	N	-48	7	0.004989309	4	2	245	50	197	247	-73	YES	DPN	25752	NA	NA	NA	NA	NA	NA	NA	NA	0.194552529	50
YJR097W	JJJ3;DPH4	chrX	612413	612931	+	HT	370	14	519	21387	11809	33196	0	NO	TFIID	TATA-less	1	TAF1-enriched	-2.338345865	0.025994864	G+E	40.52592	0	6.994266	2.968444	0.008544331	0.202000458	17	2.618	0.009423	5.865537205	0.051737204	0.038778739	100.5	23.325	0.206	Lethal	NA	1.02512	0.98663	77	19	265.1	N	-63	3	0.008108108	4	134	55	8	154	180	-425	NA	NA	132820	0.84344	0.040229885	NA	NA	NA	NA	2	NA	0.096525097	50
YMR059W	SEN15	chrXIII	391099	391485	+	HT	367	13	387	17220	4250	21470	0	NO	TFIID	TATA-less	1	TAF1-enriched	0.301587302	0.553410818	NA	NA	NA	NA	NA	NA	0.102341862	17	2.055	0.039065	6.327425263	0.02903117	0.026928071	NA	NA	NA	Essential	Essential	0	NA	NA	24	124.6	N	-22	1	0.002724796	4	19	233	41	211	252	-56	YES	DPN	391099	0.15179	0	4.57E-05	4.75E-05	0.000216665	0.000462422	2	NA	0.132124352	51
YIL066C	RNR3;DIN1	chrIX	238099	240708	-	HT	600	54	2610	59025	28306	87331	1	YES	NA	NA	NA	NA	-2.685185185	0.001233021	NA	NA	NA	NA	NA	NA	0.253615391	8	NA	NA	4.475340567	0.029986578	0.038693442	NA	NA	NA	Lethal	NA	0.99437	NA	NA	NA	154.9	Y	NA	3	0.005	4	11	169	NA	NA	180	-64	NO	OPN	199180	1.4409	0.034482759	NA	NA	NA	NA	2	NA	0.019547719	51
YJR155W	AAD10	chrX	727405	728271	+	HT	581	27	867	28221	10200	38421	3	YES	SAGA	NA	NA	NA	NA	NA	G+E	40.52592	0	6.994266	2.968444	0.008544331	0.52840141	14	NA	NA	6.090774375	0.829397811	0.14952332	NA	NA	NA	NA	NA	NA	NA	NA	NA	245.6	NA	NA	4	0.006884682	4	144	35	NA	NA	200	-238	NO	OPN	17480	1.3013	NA	NA	NA	NA	6.05E-05	3	NA	0.059468822	51.5
YHR035W	YHR035W	chrVIII	178219	180111	+	HH	220	20	1893	18522	11693	30215	0	NO	TFIID	NA	NA	NA	0.039660579	0.87524888	NA	NA	NA	NA	NA	NA	0.40183625	16	NA	NA	4.959345316	0.025201457	0.032010206	NA	NA	NA	Lethal	NA	1.02862	0.98308	NA	3	115.5	N	-25	1	0.004545455	4	169	4	21	225	246	-79	YES	DPN	178219	0.247	0.186781609	9.29E-05	2.30E-05	0.000944374	6.17E-06	2	NA	0.027484144	52
YLR070C	XYL2	chrXII	274141	275211	-	HT	167	31	1071	39300	15350	54650	0	NO	TFIID	NA	NA	NA	NA	NA	NA	NA	NA	NA	NA	NA	0.121513336	14	NA	NA	4.972680409	0.116079608	0.068515277	NA	NA	NA	Lethal	NA	1.03468	0.99211	46	NA	131.7	Y	175	1	0.005988024	4	124	31	146	51	201	-106	NO	OPN	274141	0.80128	0.08045977	6.14E-05	6.04E-05	6.02E-05	6.82E-05	2	NA	0.048598131	52
YGR035C	YGR035C	chrVII	557072	557422	-	HH	143	48	351	52521	19689	72210	1	YES	TFIID	TATA-containing	0	TAF1-depleted	-0.041666667	0.953096673	G+E	40.52592	0	6.994266	2.968444	0.008544331	0.644147986	15	NA	NA	4.220418767	0.418159517	0.153219996	NA	NA	NA	Lethal	NA	1.06108	1.01434	NA	19	125.8	N	-90	0	0	1	36	636	126	546	NA	NA	NA	NA	533518	0.54463	0.040229885	0.000568635	0.000379219	2.97E-05	7.18E-05	2	NA	0.148571429	52
YMR095C	SNO1	chrXIII	457285	457959	-	HH	449	38	675	39849	15652	55501	0	NO	TFIID	NA	NA	NA	-2.64	0.015699397	NA	NA	NA	NA	NA	NA	5.417343938	9	NA	NA	6.40512852	0.282291846	0.082950941	NA	NA	NA	Lethal	NA	1.02716	NA	63	NA	181.7	Y	NA	2	0.004454343	4	20	156	NA	NA	214	-375	UNCLEAR	UNCLEAR	457285	0.50393	0.022988506	0.000462408	7.63E-05	8.88E-05	0.001404469	3	NA	0.077893175	52.5
YDR528W	HLR1	chrIV	1494586	1495857	+	HT	2173	31	1272	31344	17113	48457	0	NO	TFIID	TATA-containing	0	TAF1-depleted	-0.853913043	0.067094948	NA	NA	NA	NA	NA	NA	0.044471384	17	0.612	0.85736	6.335387366	0.032269701	0.02835465	48	NA	NA	Lethal	NA	1.0109	NA	NA	33	73.9	Y	-307	12	0.005522319	3	72	110	29	316	182	-3	NO	OPN	36076	0.43438	0.086206897	5.65E-05	8.53E-05	4.77E-05	0.000180871	3	NA	0.041306058	52.5
YLL062C	MHT1	chrXII	16639	17613	-	HH	343	33	975	36123	13117	49240	0	NO	TFIID	TATA-less	2	TAF1-depleted	NA	NA	G+E	40.52592	0	6.994266	2.968444	0.008544331	0.257446463	17	2.844	0.003775	6.693358544	0.310056147	0.08319095	NA	NA	NA	Lethal	NA	1.01882	NA	NA	27	258.8	Y	-79	1	0.002915452	4	78	71	8	266	274	-146	YES	DPN	16639	0.62928	0.014367816	0.000183904	0.000139239	0.000437752	0.000118224	2	NA	0.053901437	52.5
YMR118C	YMR118C;YM9718.17C	chrXIII	502144	502734	-	HH	2599	0	591	0	0	0	0	NO	TFIID	NA	NA	NA	-1.327586207	0.139333049	G+E	40.52592	0	6.994266	2.968444	0.008544331	0.880014286	7	NA	NA	4.219468058	0.445412267	0.158169734	NA	NA	NA	Lethal	NA	1.0128	1.01811	NA	NA	95.7	Y	180	13	0.005001924	4	101	59	71	79	191	-134	NO	OPN	421697	1.6923	0.08045977	0.000890545	0.000482023	0.007443329	0.000162663	2	NA	0.088983051	52.5
YBL049W	MOH1	chrII	126828	127244	+	HT	709	33	417	44457	18108	62565	0	NO	TFIID	NA	NA	NA	NA	0.024180276	NA	NA	NA	NA	NA	NA	0.623688447	12	NA	NA	7.066386073	0.089766184	0.042399333	NA	NA	NA	Lethal	NA	1.008	0.99269	NA	1	160.7	N	-206	4	0.005641749	4	36	136	70	154	224	-211	UNCLEAR	UNCLEAR	126828	2.3273	0.066091954	NA	NA	NA	0.000104889	2	NA	0.126201923	52.5
YOL091W	SPO21;MPC70	chrXV	145334	147163	+	HT	204	22	1830	23247	10823	34070	0	NO	TFIID	NA	NA	NA	-0.936619718	0.05397439	NA	NA	NA	NA	NA	NA	1.562076709	17	10.109	0	5.159760378	0.355390267	0.115537571	NA	NA	NA	Lethal	NA	1.00429	NA	NA	NA	130.3	N	NA	2	0.009803922	4	146	3	NA	NA	202	-274	NO	OPN	145334	0.28864	0.068965517	NA	NA	NA	5.34E-05	2	NA	0.02870421	52.5
YOR242C	SSP2	chrXV	788742	789857	-	HT	354	16	1116	16479	7120	23599	0	NO	TFIID	NA	NA	NA	-3.963636364	0.001961957	NA	NA	NA	NA	NA	NA	0.302267845	11	NA	NA	4.112377988	0.081484452	0.069413565	NA	NA	NA	Lethal	NA	1.03133	NA	NA	NA	227.4	N	NA	1	0.002824859	4	71	138	NA	NA	222	-213	UNCLEAR	UNCLEAR	301434	0.24367	0.005747126	4.21E-05	4.72E-06	3.79E-05	3.90E-06	2	NA	0.047533632	53
YFL017W-A	SMX2;SNP2	chrVI	103699	103932	+	HH	572	27	234	27519	8669	36188	0	NO	NA	TATA-less	1	TAF1-enriched	-2.9	0.189728358	NA	NA	NA	NA	NA	NA	0.095280043	17	1.846	0.057333	7.585680312	0.036314154	0.025121376	231	18.52	-0.531	NA	NA	NA	NA	NA	NA	166.6	NA	-43	3	0.005244755	4	27	215	70	172	242	-48	YES	DPN	103699	0.23456	NA	1.89E-05	1.91E-05	2.30E-05	3.82E-05	NA	NA	0.227467811	53
YDR003W-A	YDR003W-A	chrIV	454782	454904	+	HT	28	1	123	1944	754	2698	NA	NA	NA	NA	NA	NA	NA	NA	NA	NA	NA	NA	NA	NA	NA	NA	NA	NA	7.060000668	0.015708466	0.017752607	NA	NA	NA	Lethal	NA	NA	NA	NA	9	128.1	N	NA	0	0	3	136	69	NA	NA	282	-303	YES	UNCLEAR	454782	NA	NA	0.000103844	0.000101365	4.20E-05	NA	NA	NA	0.43442623	53
YNL093W	YPT53	chrXIV	449868	450530	+	HT	494	23	663	39741	12872	52613	3	YES	SAGA/TFIID	NA	NA	NA	-0.136363636	0.798414336	G+E	40.52592	0	6.994266	2.968444	0.008544331	1.048512222	10	NA	NA	5.090541232	0.187120648	0.08497612	NA	NA	NA	Lethal	NA	1.02535	NA	NA	2	139.6	Y	-186	3	0.006072874	3	118	79	107	89	196	-154	NO	OPN	333803	1.6147	0.063218391	7.68E-05	0.000328485	0.000187565	0.006772553	3	NA	0.080060423	53
YGR206W	MVB12	chrVII	910432	910737	+	HT	347	16	306	14181	6662	20843	0	NO	TFIID	NA	NA	NA	0.651785714	0.164658432	NA	NA	NA	NA	NA	NA	0.047484013	17	1.096	0.389479	6.915337577	0.017582139	0.019174431	47	NA	NA	Lethal	NA	1.03477	1.02867	2	11	124.5	N	-24	2	0.005763689	4	58	198	82	174	256	-17	YES	DPN	180203	0.21002	0.045977011	2.92E-05	8.98E-06	2.39E-05	0.000154348	1	NA	0.175409836	53.5
YBR258C	SHG1;CPS15	chrII	729734	730162	-	HH	225	18	429	19458	6512	25970	0	NO	TFIID	TATA-less	1	TAF1-enriched	-1.307692308	0.256054081	NA	NA	NA	NA	NA	NA	0.023383791	17	0.303	0.994654	5.535688682	0.058427432	0.04366533	NA	NA	NA	Lethal	NA	1.01499	1.01196	NA	23	174.7	N	-33	1	0.004444444	4	18	219	51	186	237	-57	YES	DPN	83022	0.14696	0.112068966	3.72E-05	3.63E-05	4.41E-05	0.000251078	3	NA	0.125	53.5
YDR179C	CSN9	chrIV	818708	819196	-	HH	237	50	489	47787	18431	66218	0	NO	TFIID	NA	NA	NA	-0.493333333	0.619500555	NA	NA	NA	NA	NA	NA	0.594972452	16	NA	NA	6.219886624	0.034181128	0.029724238	NA	NA	NA	Lethal	NA	1.05641	1.00325	NA	14	180.8	N	-29	1	0.004219409	4	29	186	58	157	215	-46	UNCLEAR	UNCLEAR	712737	0.28715	0.025862069	3.77E-05	4.11E-05	9.40E-05	0.00063786	1	NA	0.109631148	53.5
YDL248W	COS7	chrIV	1802	2953	+	HT	0	24	1152	29952	9782	39734	2	YES	TFIID	NA	NA	NA	NA	NA	G+E	40.52592	0	6.994266	2.968444	0.008544331	0.420953418	17	5.432	0.00083	4.450299156	0.549694871	0.166598711	NA	NA	NA	NA	NA	NA	NA	NA	NA	205.6	NA	-10	0	NA	4	33	NA	NA	209	252	-42	YES	DPN	1802	0.40336	NA	NA	NA	NA	0.00037939	2	NA	0.046481321	53.5
YPL257W	YPL257W	chrXVI	63279	63860	+	HH	8126	17	582	20001	8814	28815	0	NO	TFIID	TATA-less	3	TAF1-enriched	NA	NA	G+E	40.52592	0	6.994266	2.968444	0.008544331	1.466670876	16	NA	NA	3.941010095	1.35134034	0.294967946	NA	NA	NA	Lethal	NA	1.04136	0.9765	NA	4	124.5	N	-67	49	0.006030027	3	143	30	37	157	212	-299	UNCLEAR	UNCLEAR	63279	0.60121	0.017241379	NA	NA	NA	NA	2	NA	0.092082616	53.5
YCL021W-A	YCL021W-A	chrIII	83620	83997	+	HT	1345	7	378	4503	1230	5733	0	NO	NA	NA	NA	NA	NA	NA	NA	NA	NA	NA	NA	NA	0.243483507	14	NA	NA	4.672496604	0.360596174	0.128517291	NA	NA	NA	Lethal	NA	NA	NA	NA	1	156.7	N	NA	7	0.005204461	4	218	101	NA	NA	195	-418	NA	NA	83620	NA	NA	0.000168934	2.78E-05	6.01E-05	0.000196266	NA	NA	0.143236074	54
YBR076W	ECM8	chrII	390227	391291	+	HT	1011	40	1065	46701	29440	76141	0	NO	TFIID	NA	NA	NA	-3.192118227	0.000281704	NA	NA	NA	NA	NA	NA	0.946584167	6	NA	NA	2.442087232	0.055615123	0.096568454	NA	NA	NA	Lethal	NA	1.01152	NA	61	NA	201.9	N	NA	5	0.004945598	4	83	92	NA	NA	252	-167	YES	UNCLEAR	390227	0.67846	0.07183908	0.000119473	0.000154194	0.000264328	0.001155248	1	NA	0.05075188	54
YHL043W	ECM34	chrVIII	14901	15413	+	HT	629	21	513	25704	9760	35464	0	NO	TFIID	NA	NA	NA	NA	NA	G+E	40.52592	0	6.994266	2.968444	0.008544331	1.441804167	6	NA	NA	3.324279388	1.380898523	0.353495074	NA	NA	NA	Lethal	NA	1.02781	NA	NA	NA	123.6	Y	NA	4	0.0063593	4	133	70	NA	NA	153	-145	NO	OPN	14901	0.54402	0.043103448	NA	NA	NA	0.000223983	3	NA	0.10546875	54
YMR232W	FUS2	chrXIII	736926	738959	+	HT	292	29	2034	31914	13966	45880	0	NO	SAGA	NA	NA	NA	-1.142857143	0.018799928	NA	NA	NA	NA	NA	NA	0.190740061	15	NA	NA	4.496669992	0.086335319	0.065343626	NA	NA	NA	Lethal	NA	0.99184	NA	87	NA	316.4	N	NA	1	0.003424658	4	50	112	NA	NA	268	-187	YES	UNCLEAR	185472	0.24146	0.020114943	NA	NA	NA	0.00104555	3	NA	0.026561731	54
YHR116W	COX23	chrVIII	341665	342120	+	HH	306	21	456	26541	13583	40124	0	NO	TFIID	TATA-less	3	TAF1-enriched	0.114285714	0.872203196	G+E	40.52592	0	6.994266	2.968444	0.008544331	0.276894319	17	1.378	0.210064	6.43747894	0.085316058	0.045373217	62.5	25.72	-1.633	Lethal	NA	0.97308	0.99363	263	1	125.3	N	54	2	0.006535948	4	120	48	66	102	236	-396	YES	UNCLEAR	220523	0.36345	0.048850575	2.40E-05	3.07E-05	9.60E-05	0.000252098	3	NA	0.11978022	54.5
YNL092W	YNL092W;N2227	chrXIV	450871	452073	+	HT	341	34	1203	46827	22626	69453	0	NO	TFIID	NA	NA	NA	-1.850877193	0.002888693	NA	NA	NA	NA	NA	NA	0.202124371	17	2.232	0.021539	5.188540351	0.069358447	0.050757998	NA	NA	NA	Lethal	NA	1.00262	0.99813	NA	5	161	N	-49	2	0.005865103	3	153	29	20	251	271	-104	YES	DPN	332260	0.87868	0.020114943	4.05E-05	7.91E-05	8.40E-05	0.000603256	3	NA	0.045341098	54.5
YJL194W	CDC6	chrX	69338	70879	+	HH	556	31	1542	32367	12857	45224	0	NO	TFIID	TATA-less	1	TAF1-enriched	-0.284750337	0.47203842	G+E	40.52592	0	6.994266	2.968444	0.008544331	0.263266729	17	2.024	0.041016	5.442704409	0.06714209	0.047608301	NA	NA	NA	Essential	Essential	0	NA	NA	8	71.3	N	-61	4	0.007194245	4	116	44	17	93	200	-229	NO	OPN	69338	2.0379	0.057471264	0.000773172	0.000676873	0.00086272	0.000218362	3	NA	0.035366645	54.5
YER093C-A	AIM11;GEP8	chrV	347912	348400	-	HT	329	12	414	17832	6558	24390	1	YES	TFIID	NA	NA	NA	-2.683333333	0.014741757	NA	NA	NA	NA	NA	NA	0.118702938	17	4.774	2.90E-05	6.472064813	0.064688064	0.039297889	NA	NA	NA	Lethal	NA	0.98842	0.99415	NA	1	234.9	N	-13	2	0.006079027	4	171	26	184	13	168	-101	NO	OPN	228474	0.34418	0.031609195	NA	NA	NA	6.85E-05	2	NA	0.111680328	54.5
YJL170C	ASG7	chrX	101150	101779	-	HT	448	41	630	40176	22577	62753	0	NO	TFIID	NA	NA	NA	-0.5	0.386631274	NA	NA	NA	NA	NA	NA	NA	1	NA	NA	5.067845752	0.234651866	0.095584752	NA	NA	NA	Lethal	NA	1.04115	NA	NA	1	212.2	N	-108	2	0.004464286	3	118	75	33	149	215	-332	UNCLEAR	UNCLEAR	101150	0.66245	0.040229885	NA	NA	NA	0.000576641	3	NA	0.086645469	54.5
YFL052W	YFL052W	chrVI	28232	29629	+	HT	3034	31	1398	33279	16769	50048	3	YES	NA	NA	NA	NA	NA	NA	NA	NA	NA	NA	NA	NA	1.22713	5	NA	NA	5.44981424	0.258021191	0.093206455	NA	NA	NA	Lethal	NA	1.00211	0.99635	NA	28	145.8	Y	NA	18	0.005932762	4	5	269	NA	NA	274	-70	YES	DPN	28232	1.4806	0.106321839	0.000187694	0.000394933	0.000374077	4.73E-05	3	NA	0.039370079	55
YGL205W	POX1;FOX1	chrVII	108158	110404	+	HH	654	40	2247	57780	26658	84438	0	NO	TFIID	NA	NA	NA	-4.285714286	6.81E-07	NA	NA	NA	NA	NA	NA	0.136781254	8	NA	NA	4.364567994	0.121334202	0.079808722	NA	NA	NA	Lethal	NA	1.01492	NA	90	6	110.4	N	NA	3	0.004587156	3	18	174	NA	NA	192	-57	NO	OPN	108158	1.311	0.005747126	NA	NA	NA	5.56E-05	3	NA	0.024487979	55
YDR066C	RTR2	chrIV	581908	582498	-	HT	293	15	591	22692	9636	32328	0	NO	TFIID	NA	NA	NA	NA	NA	NA	NA	NA	NA	NA	NA	0.057077394	17	0.548	0.90421	6.160475701	0.021320717	0.023702091	NA	NA	NA	Lethal	NA	1.03351	1.0069	NA	17	118.1	Y	-122	1	0.003412969	3	45	63	59	333	392	-138	YES	DPN	581908	0.26439	0.00862069	2.91E-05	1.10E-05	7.91E-06	0.000101955	3	NA	0.094067797	55.5
YIL156W-B	YIL156W-B	chrIX	47690	47973	+	HH	148	0	222	0	0	0	NA	NA	NA	NA	NA	NA	NA	NA	NA	NA	NA	NA	NA	NA	NA	NA	NA	NA	7.162005194	0.045667643	0.029837997	NA	NA	NA	NA	NA	NA	NA	NA	NA	173.7	NA	-35	0	0	4	35	161	70	126	209	-407	NA	NA	47690	NA	NA	5.62E-05	2.77E-05	2.79E-05	NA	NA	NA	0.196113074	55.5
YGR161W-C	YGR161W-C	chrVII	810227	810505	+	HH	807	6	279	8178	2814	10992	NA	NA	NA	TATA-less	2	TAF1-enriched	0.321428571	0.579219973	NA	NA	NA	NA	NA	NA	NA	NA	NA	NA	7.198911995	0.054251561	0.03235484	NA	NA	NA	Lethal	NA	NA	NA	NA	70	156.5	N	-43	1	0.001239157	1	383	2	41	982	NA	NA	NA	NA	280435	NA	NA	0.000295991	7.44E-05	0.000263838	NA	NA	NA	0.199640288	55.5
YHR022C	YHR022C	chrVIII	149575	150345	-	HT	872	41	771	44547	16680	61227	2	YES	TFIID	NA	NA	NA	-1.594276094	0.016764473	NA	NA	NA	NA	NA	NA	0.402815809	17	0.772	0.703312	3.514075026	0.220606073	0.133658844	NA	NA	NA	Lethal	NA	1.00346	0.98132	NA	2	115	N	-441	3	0.003440367	4	85	65	71	806	178	-267	NO	OPN	149575	0.47463	0.048850575	0.000352851	0.000264482	0.000816145	0.000484894	1	NA	0.072077922	55.5
YLR341W	SPO77	chrXII	807385	808818	+	HT	560	42	1434	40764	12396	53160	0	NO	TFIID	NA	NA	NA	-0.24556962	0.433692244	NA	NA	NA	NA	NA	NA	0.276846818	11	NA	NA	2.495320651	0.057612163	0.096190178	NA	NA	NA	Lethal	NA	1.01064	0.98796	NA	NA	340	N	NA	3	0.005357143	3	115	80	NA	NA	165	-155	NO	OPN	269359	0.25607	0.017241379	NA	NA	NA	NA	2	NA	0.038729937	55.5
YBL039W-B	YBL039W-B	chrII	143393	143572	+	HH	525	1	180	2031	815	2846	NA	NA	NA	TATA-less	2	TAF1-enriched	NA	NA	NA	NA	NA	NA	NA	NA	NA	NA	NA	NA	7.086877584	0.059293211	0.034359557	NA	NA	NA	NA	NA	NA	NA	NA	NA	113.1	NA	-285	2	0.003809524	4	61	87	35	245	280	-325	YES	UNCLEAR	143393	NA	NA	7.35E-05	1.32E-05	0.000161471	NA	NA	NA	0.312849162	56
YIL160C	POT1;FOX3;POX3	chrIX	40191	41444	-	HH	381	32	1254	39306	16881	56187	1	YES	TFIID	NA	NA	NA	NA	1	NA	NA	NA	NA	NA	NA	0.042403404	14	NA	NA	4.805038279	0.592458176	0.160188744	NA	NA	NA	Lethal	NA	1.02337	NA	NA	2	254.5	Y	NA	1	0.002624672	4	75	84	NA	NA	311	-159	YES	UNCLEAR	40191	0.90545	0.114942529	2.87E-05	4.30E-05	0.00020588	NA	1	NA	0.044692737	56
YMR251W	GTO3	chrXIII	772915	774015	+	HT	357	40	1101	49824	17356	67180	1	YES	TFIID	TATA-less	2	TAF1-enriched	-0.397129187	0.318692316	NA	NA	NA	NA	NA	NA	6.963966667	7	NA	NA	5.072349686	0.128578238	0.070692697	NA	NA	NA	Lethal	NA	1.03046	0.98222	NA	NA	178.2	Y	365	2	0.005602241	3	105	124	131	19	252	-390	YES	UNCLEAR	150416	3.511	0.017241379	7.30E-05	5.08E-05	8.51E-05	0.000477164	1	NA	0.050909091	56
YLL056C	YLL056C;L0575	chrXII	27409	28305	-	HH	1804	24	897	26571	11312	37883	2	YES	TFIID	NA	NA	NA	NA	NA	G+E	40.52592	0	6.994266	2.968444	0.008544331	0.181599568	17	1.376	0.243461	5.585988427	0.069623343	0.047236467	NA	NA	NA	Lethal	NA	1.01432	0.98694	NA	17	191.8	N	258	10	0.005543237	5	45	127	79	70	172	-30	NO	OPN	27409	0.45615	0.048850575	0.000129462	6.50E-05	0.000177324	0.000318762	3	NA	0.0625	56
YGR067C	YGR067C	chrVII	622372	624786	-	HT	538	43	2415	46470	18318	64788	0	NO	TFIID	NA	NA	NA	-1.39049236	0.000509966	NA	NA	NA	NA	NA	NA	0.1058	2	NA	NA	3.7445654	0.078206314	0.07468261	NA	NA	NA	Lethal	NA	1.03377	1.04142	NA	4	116	N	NA	3	0.005576208	3	137	23	NA	NA	158	-249	NO	OPN	466154	3.7363	0.040229885	0.003761366	0.000112078	8.60E-05	4.23E-05	1	NA	0.023198012	56
YJL161W	FMP33	chrX	117245	117787	+	HH	1616	30	543	44217	14405	58622	3	YES	SAGA	NA	NA	NA	-0.4	0.551640228	G+E	40.52592	0	6.994266	2.968444	0.008544331	0.372304847	13	NA	NA	6.146087512	0.176669789	0.068388394	NA	NA	NA	Lethal	NA	1.02405	1.02065	NA	20	185.7	N	11	8	0.004950495	4	107	73	96	84	180	-267	NO	OPN	117245	2.1914	0.014367816	9.29E-05	0.000157205	0.000207308	0.000672529	2	NA	0.103321033	56
YMR271C	URA10	chrXIII	806865	807548	-	HT	2075	38	684	49581	18671	68252	3	YES	TFIID	NA	NA	NA	NA	NA	G+E	40.52592	0	6.994266	2.968444	0.008544331	0.228457279	17	4.931	5.60E-05	6.508383318	0.031840979	0.02741701	NA	NA	NA	Lethal	NA	1.01234	NA	23	4	123.5	Y	-564	12	0.005783133	4	0	0	56	222	214	-75	UNCLEAR	UNCLEAR	116883	1.5439	0.086206897	NA	NA	NA	0.000559298	2	NA	0.081991215	56
YNL210W	MER1	chrXIV	250931	251743	+	HH	616	24	813	22239	8328	30567	0	NO	TFIID	NA	NA	NA	0.41978022	0.251801341	G+E	40.52592	0	6.994266	2.968444	0.008544331	0.232643269	13	NA	NA	2.351189931	0.085881288	0.124641183	NA	NA	NA	Lethal	NA	0	NA	NA	NA	151.8	N	NA	3	0.00487013	2	139	185	NA	NA	158	-260	NO	OPN	250931	0.54848	0.060344828	0.000139085	1.01E-05	7.70E-05	4.70E-05	3	NA	0.069581281	56.5
YDL243C	AAD4	chrIV	17577	18566	-	HH	2069	23	990	28389	13140	41529	0	NO	TFIID	NA	NA	NA	NA	NA	G+E	40.52592	0	6.994266	2.968444	0.008544331	0.88365225	17	13.519	0	5.11258461	0.274303137	0.102441252	NA	NA	NA	Lethal	NA	1.01963	NA	NA	12	264.3	Y	NA	11	0.005316578	4	41	120	NA	NA	191	-195	NO	OPN	17577	0.87187	0.037356322	0.000335692	3.77E-05	0.000117365	0.000364627	2	NA	0.057128413	56.5
YIR017C	MET28	chrIX	383556	384119	-	HH	490	43	564	42978	15386	58364	0	NO	TFIID	TATA-containing	0	TAF1-enriched	-17	0.003911789	NA	NA	NA	NA	NA	NA	1.034758722	16	NA	NA	7.287598792	0.058506083	0.033190673	NA	NA	NA	Lethal	NA	1.02272	NA	NA	8	142.2	N	6	2	0.004081633	4	49	230	43	236	279	-26	YES	DPN	55769	1.1983	0.011494253	0.00035751	0.000193927	0.000304535	NA	1	NA	0.10035524	56.5
YHL042W	YHL042W	chrVIII	15667	16119	+	HT	254	17	453	19677	6815	26492	0	NO	TFIID	TATA-less	2	TAF1-enriched	NA	NA	G+E	40.52592	0	6.994266	2.968444	0.008544331	0.474477923	17	1.984	0.042002	4.604950965	0.765560138	0.190004832	NA	NA	NA	Lethal	NA	1.036	0.98027	NA	1	97.8	Y	219	1	0.003937008	4	27	139	221	24	189	-214	NO	OPN	15667	0.35946	0.086206897	NA	NA	NA	0.000696394	3	NA	0.125	56.5
YJR055W	HIT1	chrX	538772	539266	+	HT	1223	16	495	19935	8577	28512	0	NO	TFIID	TATA-less	1	TAF1-enriched	-2.28125	0.028409779	NA	NA	NA	NA	NA	NA	0.632929597	16	NA	NA	5.534483576	0.043572552	0.037716327	NA	NA	NA	Lethal	NA	0.73418	NA	NA	15	102.6	N	-10	6	0.004905969	4	22	193	32	183	215	-53	UNCLEAR	UNCLEAR	206485	0.28194	0.068965517	5.87E-05	9.17E-05	0.000116124	1.40E-05	2	NA	0.115384615	57
YHL044W	YHL044W	chrVIII	13565	14272	+	HH	1280	45	708	49995	19023	69018	2	YES	TFIID	TATA-containing	0	TAF1-enriched	NA	NA	NA	NA	NA	NA	NA	NA	1.855788095	15	NA	NA	4.575970247	0.359618105	0.131050168	NA	NA	NA	Lethal	NA	1.01591	0.98428	17	14	118.3	N	-27	7	0.00546875	3	25	275	52	248	300	-50	YES	DPN	13565	0.51174	0.043103448	NA	NA	NA	0.000106077	1	NA	0.080622348	57
YJR153W	PGU1;PGL1;PSM1	chrX	722815	723900	+	HT	1518	28	1086	28428	15482	43910	0	NO	SAGA/TFIID	NA	NA	NA	NA	NA	NA	NA	NA	NA	NA	NA	1.428326923	13	NA	NA	3.668579815	1.034286967	0.27721872	NA	NA	NA	Lethal	NA	1.00804	NA	NA	7	154.9	N	NA	10	0.006587615	4	139	11	NA	NA	182	-86	NO	OPN	21851	0.27301	0.051724138	NA	NA	NA	0.000372317	2	NA	0.052534562	57
YER058W	PET117	chrV	271768	272091	+	HH	642	30	324	31152	12754	43906	3	YES	TFIID	TATA-less	1	TAF1-enriched	-1.619047619	0.198091064	NA	NA	NA	NA	NA	NA	0.527732684	17	6.475	1.00E-06	6.904770924	0.04407977	0.030406777	NA	NA	NA	Lethal	NA	1.00546	NA	5	37	125.9	N	-32	3	0.004672897	3	22	252	54	220	274	-53	YES	DPN	271768	0.56157	0.045977011	0.000108409	0.000122119	9.54E-05	0.000137452	2	NA	0.178018576	57.5
YJL205C	NCE101;NCE1	chrX	50139	50443	-	HT	186	10	162	8502	2315	10817	NA	NA	NA	TATA-containing	0	TAF1-enriched	1	0.255080925	NA	NA	NA	NA	NA	NA	NA	NA	NA	NA	6.410671059	0.032977434	0.028327284	NA	NA	NA	NA	NA	NA	NA	153	NA	144.4	NA	-19	0	0	4	33	194	52	175	227	-42	YES	DPN	50139	NA	NA	NA	NA	NA	NA	NA	NA	0.189144737	57.5
YLL063C	AYT1	chrXII	14648	16072	-	HT	567	21	1425	13344	7957	21301	0	NO	TFIID	TATA-less	1	TAF1-enriched	NA	NA	NA	NA	NA	NA	NA	NA	2.516277345	15	NA	NA	4.676114938	0.513657634	0.153268073	NA	NA	NA	Lethal	NA	0.99916	NA	NA	1	260.7	N	31	4	0.007054674	4	102	59	71	90	191	-402	NA	NA	14648	0.22589	0.028735632	NA	NA	NA	0.000995916	2	NA	0.040379213	57.5
YLL052C	AQY2;AQY2-2	chrXII	35912	36361	-	HT	972	35	450	34770	17964	52734	1	YES	SAGA	TATA-containing	0	TAF1-enriched	NA	NA	NA	NA	NA	NA	NA	NA	4.057639422	15	NA	NA	6.631036022	0.449415338	0.101097999	NA	NA	NA	Lethal	NA	1.03029	NA	10	NA	NA	Y	-22	5	0.005144033	5	78	72	100	50	194	-147	NO	OPN	35912	0.33112	0.08045977	NA	NA	NA	3.56E-05	2	NA	0.128062361	57.5
YJR149W	YJR149W;J2213	chrX	707160	708374	+	HT	286	39	1215	44184	20177	64361	0	NO	SAGA/TFIID	NA	NA	NA	NA	NA	NA	NA	NA	NA	NA	NA	0.705400176	16	NA	NA	5.568105501	0.09428299	0.055145391	NA	NA	NA	Lethal	NA	1.01854	1.01497	NA	2	241.4	N	NA	1	0.003496503	4	60	198	NA	NA	258	-15	YES	DPN	37377	0.68178	0.097701149	0.000215789	2.17E-05	5.11E-05	2.26E-05	1	NA	0.047775947	58
YPL046C	ELC1	chrXVI	466644	466943	-	HH	317	22	300	20004	7210	27214	0	NO	TFIID	NA	NA	NA	-1.272727273	0.444192353	NA	NA	NA	NA	NA	NA	0.055004183	17	2.884	0.003039	6.458121415	0.061482033	0.038394402	NA	NA	NA	Lethal	NA	1.0252	NA	50	36	271.7	N	-68	2	0.006309148	3	188	24	44	200	244	-99	YES	DPN	466644	0.32569	0.045977011	2.17E-05	3.15E-05	5.89E-06	5.08E-05	2	NA	0.193979933	58
YEL041W	YEF1	chrV	75944	77431	+	HT	617	40	1488	42840	21664	64504	1	YES	TFIID	NA	NA	NA	-2.805714286	2.15E-05	G+E	40.52592	0	6.994266	2.968444	0.008544331	1.272283464	15	NA	NA	6.45397897	0.073707207	0.042065633	NA	NA	NA	Lethal	NA	1.02937	NA	NA	21	96.3	Y	-269	3	0.004862237	4	68	95	174	80	254	-170	YES	UNCLEAR	75944	0.96195	0	3.60E-05	5.23E-05	0.000160378	4.28E-05	2	NA	0.039004707	58
YHR199C-A	NBL1	chrVIII	498571	498859	-	HH	220	2	222	2115	994	3109	NA	NA	NA	NA	NA	NA	0.095238095	0.944951637	NA	NA	NA	NA	NA	NA	NA	NA	NA	NA	5.704149447	0.023254176	0.026733732	NA	NA	NA	Essential	Essential	NA	NA	NA	NA	220.8	N	-31	0	0	4	8	239	39	208	247	-67	YES	DPN	63784	NA	NA	7.16E-05	3.91E-05	5.40E-05	NA	NA	NA	0.203125	58.5
YAR023C	YAR023C	chrI	179281	179820	-	HH	3950	22	540	30660	12786	43446	3	YES	TFIID	NA	NA	NA	NA	NA	NA	NA	NA	NA	NA	NA	0.939331818	12	NA	NA	5.617680354	0.17103965	0.073619248	NA	NA	NA	Lethal	NA	1.03787	0.97564	NA	2	89.1	Y	NA	24	0.006075949	5	99	55	NA	NA	164	-130	NO	OPN	50398	0.22307	0.054597701	7.46E-05	5.68E-05	0.000273601	1.03E-05	2	NA	0.108534323	58.5
YOR304C-A	YOR304C-A	chrXV	888520	888750	-	HH	272	21	231	23418	9069	32487	0	NO	TFIID	NA	NA	NA	NA	0.000763944	G+E	40.52592	0	6.994266	2.968444	0.008544331	0.029538971	17	1.394	0.194143	6.963879649	0.045061554	0.030482587	233.5	17.335	-2.093	Lethal	NA	1.01613	0.99988	NA	74	294.1	N	-1	2	0.007352941	4	196	1	0	0	240	-76	YES	DPN	202541	1.6756	0.054597701	0.000102711	8.74E-05	0.000163782	6.67E-05	3	NA	0.254347826	58.5
YBL013W	FMT1	chrII	202056	203261	+	HH	308	17	1206	14121	5469	19590	0	NO	NA	TATA-less	2	TAF1-enriched	-0.424761905	0.28958396	NA	NA	NA	NA	NA	NA	0.200715255	15	NA	NA	4.341077774	0.047387285	0.050145659	NA	NA	NA	Lethal	NA	1.04046	NA	NA	NA	192	N	-66	1	0.003246753	4	27	168	93	102	195	-48	NO	OPN	202056	0.21257	0.195402299	NA	NA	NA	1.50E-05	1	NA	0.048547718	58.5
YBR091C	TIM12;MRS5	chrII	427155	427484	-	HT	214	39	330	40596	16406	57002	0	NO	TFIID	TATA-less	2	TAF1-enriched	-1.166666667	0.562246626	G+E	40.52592	0	6.994266	2.968444	0.008544331	0.058537469	17	1.493	0.150577	6.998360565	0.056157101	0.033861487	NA	NA	NA	Essential	Essential	0	NA	NA	27	117.8	N	-41	1	0.004672897	5	16	133	57	92	167	-339	NO	OPN	385700	0.2046	0.278735632	NA	NA	NA	0.000113827	2	NA	0.17781155	58.5
YLL057C	JLP1	chrXII	25756	26994	-	HT	415	30	1239	32313	13773	46086	1	YES	SAGA/TFIID	NA	NA	NA	NA	NA	G+E	40.52592	0	6.994266	2.968444	0.008544331	0.060222578	15	NA	NA	4.159747136	0.363533166	0.144945617	NA	NA	NA	Lethal	NA	1.00054	1.0005	32	NA	350.9	N	-14	2	0.004819277	4	73	108	87	94	190	-342	NO	OPN	25756	0.29884	0.07183908	NA	NA	NA	NA	3	NA	0.047253635	58.5
YOR180C	DCI1;ECI2;EHD2	chrXV	674352	675167	-	HH	772	31	816	37272	18018	55290	1	YES	TFIID	NA	NA	NA	-0.819753086	0.195153379	NA	NA	NA	NA	NA	NA	0.402934963	12	NA	NA	5.451908695	0.039988505	0.036679129	NA	NA	NA	Lethal	NA	1.04028	NA	NA	8	167.2	Y	NA	5	0.006476684	4	151	22	NA	NA	256	-97	YES	DPN	416124	0.39463	0.057471264	1.40E-05	3.08E-05	9.24E-05	3.35E-05	1	NA	0.072392638	59
YIL132C	CSM2	chrIX	99860	100501	-	HT	280	20	642	16452	6515	22967	0	NO	SAGA/TFIID	NA	NA	NA	-0.628959276	0.343530003	NA	NA	NA	NA	NA	NA	0.040597407	17	0.74	0.742385	5.199234502	0.0340751	0.035504154	NA	NA	NA	Lethal	NA	1.00789	1.00252	50	2	154.6	N	-11	1	0.003571429	4	23	161	34	150	184	-52	NO	OPN	99860	0.1499	0.097701149	0.000311143	0.000382713	0.000446186	9.39E-05	1	NA	0.092043682	59
YJR034W	PET191	chrX	496683	497009	+	HH	232	10	327	8022	4454	12476	0	NO	TFIID	TATA-less	1	TAF1-depleted	NA	0.025110077	NA	NA	NA	NA	NA	NA	0.185686758	17	3.611	0.000514	7.292999318	0.034202148	0.025358323	NA	NA	NA	Lethal	NA	0.80581	NA	12	47	195.8	N	-64	0	0	4	6	262	70	198	268	-69	YES	DPN	248742	0.32298	0.054597701	NA	NA	NA	0.000785813	2	NA	0.180981595	59
YLR054C	OSW2	chrXII	248717	250978	-	HT	294	35	2175	52182	14925	67107	0	NO	SAGA/TFIID	NA	NA	NA	-1.371900826	0.001331347	NA	NA	NA	NA	NA	NA	0.113699395	17	2.003	0.037044	3.314520944	0.137756872	0.111978815	NA	NA	NA	Lethal	NA	1.00656	0.949	NA	NA	141.3	N	NA	1	0.003401361	3	116	86	NA	NA	277	-161	YES	UNCLEAR	248717	0.65502	0.040229885	NA	NA	NA	0.000969676	1	NA	0.026094648	59
YNR056C	BIO5	chrXIV	731618	733303	-	HT	53	29	1686	28401	11354	39755	3	YES	TFIID	NA	NA	NA	-3.739010989	0.000354681	G+E	40.52592	0	6.994266	2.968444	0.008544331	NA	1	NA	NA	3.609007234	0.190716318	0.121005796	NA	NA	NA	Lethal	NA	1.03091	NA	NA	2	184.2	Y	NA	1	0.018867925	4	240	19	NA	NA	194	-372	NO	OPN	51030	0.31925	0.086206897	NA	NA	NA	1.98E-05	3	NA	0.035014837	59
YLL033W	IRC19;RRG4	chrXII	73409	74101	+	HH	263	25	693	29850	10691	40541	0	NO	TFIID	NA	NA	NA	-1.88	0.053873305	NA	NA	NA	NA	NA	NA	0.095605051	17	0.746	0.732965	5.921526577	0.0145218	0.020350568	NA	NA	NA	Lethal	NA	0.67593	0.99377	NA	6	308.4	N	-14	1	0.003802281	4	9	259	23	245	268	-66	YES	DPN	73409	0.25595	0.022988506	2.90E-05	1.06E-05	1.64E-05	NA	2	NA	0.085982659	59.5
YAL046C	AIM1	chrI	57029	57385	-	HH	133	31	357	23961	7913	31874	0	NO	TFIID	TATA-containing	0	TAF1-enriched	0.314285714	0.632875662	NA	NA	NA	NA	NA	NA	0.046909733	17	0.833	0.648525	7.184600207	0.026508123	0.022661408	NA	NA	NA	Lethal	NA	1.02227	0.96199	NA	30	124.1	N	2	0	0	4	47	160	45	162	207	-28	UNCLEAR	UNCLEAR	57029	0.30495	0.005747126	4.18E-05	2.36E-05	4.00E-05	3.93E-05	1	NA	0.167134831	59.5
YOL084W	PHM7	chrXV	162356	165331	+	HH	1762	58	2976	70698	28771	99469	NA	YES	SAGA	NA	NA	NA	-2.059142857	7.91E-06	G+E	40.52592	0	6.994266	2.968444	0.008544331	1.727243269	13	NA	NA	6.517364404	0.486379334	0.107007829	NA	NA	NA	Lethal	NA	1.01495	NA	NA	NA	135.3	Y	-303	3	0.001702611	1	204	143	160	366	NA	NA	NA	NA	162356	6.2812	0.083333333	3.19E-05	6.10E-05	0.00017657	0.000518873	1	NA	0.02	59.5
YPR192W	AQY1;AQY1-2	chrXVI	921860	922777	+	HT	1373	32	918	28545	12960	41505	0	NO	SAGA	NA	NA	NA	-4.369318182	0.000433477	NA	NA	NA	NA	NA	NA	2.014546778	15	NA	NA	6.90222251	1.301374052	0.165276884	NA	NA	NA	Lethal	NA	1.01641	NA	1	3	252.5	Y	NA	7	0.005098325	4	137	24	NA	NA	208	-442	NA	NA	25289	0.78356	0.060344828	0.000132321	6.48E-05	0.000315491	0.003498917	1	NA	0.064885496	59.5
YKR041W	YKR041W	chrXI	518198	518950	+	HT	1327	36	753	38193	13778	51971	0	NO	TFIID	TATA-less	1	TAF1-enriched	0.029003783	0.945142415	NA	NA	NA	NA	NA	NA	0.462786739	15	NA	NA	3.78577736	0.154063241	0.10367987	NA	NA	NA	Lethal	NA	1.01366	1.02406	NA	5	269.3	N	-6	5	0.003767898	2	586	44	592	38	314	-119	YES	DPN	147866	0.32971	0.040229885	0.000271974	8.33E-05	0.000108597	1.93E-05	2	NA	0.07912234	59.5
YIR039C	YPS6	chrIX	430498	432111	-	HH	1818	33	1614	40719	15432	56151	0	NO	TFIID	NA	NA	NA	NA	NA	NA	NA	NA	NA	NA	NA	0.679985568	14	NA	NA	3.588353668	0.686579079	0.230913882	NA	NA	NA	Lethal	NA	1.00348	NA	NA	25	108.9	Y	NA	10	0.00550055	4	25	127	NA	NA	180	-362	NO	OPN	7777	1.7525	0.045977011	0.000102269	0.000155856	0.000414187	NA	3	NA	0.036887787	59.5
YDR534C	FIT1	chrIV	1503314	1504900	-	HH	3105	34	1587	38082	13788	51870	0	NO	NA	TATA-less	1	TAF1-enriched	NA	NA	NA	NA	NA	NA	NA	NA	1.109380271	17	0.99	0.495696	4.321796101	0.121908053	0.080788943	NA	NA	NA	Lethal	NA	1.00215	1.00196	20	3	159	Y	-22	15	0.004830918	5	22	128	44	106	195	-203	NO	OPN	27033	0.77782	0.014367816	NA	NA	NA	0.003303962	1	NA	0.037515763	59.5
YIL072W	HOP1	chrIX	226602	228419	+	HH	648	29	1818	26115	11789	37904	1	YES	TFIID	NA	NA	NA	-1.809302326	0.001620046	NA	NA	NA	NA	NA	NA	0.1682	2	NA	NA	2.618981121	0.173292554	0.158948921	NA	NA	NA	Lethal	NA	1.0097	NA	79	NA	151.3	N	-107	4	0.00617284	4	91	69	38	220	258	-144	YES	DPN	211469	1.7785	0.028735632	NA	NA	NA	5.11E-05	3	NA	0.032746285	59.5
YIL006W	YIA6;NDT1	chrIX	344062	345183	+	HH	406	21	1122	28248	10555	38803	0	NO	TFIID	TATA-less	2	TAF1-enriched	-3.0625	0.002916704	NA	NA	NA	NA	NA	NA	0.303001903	15	NA	NA	5.684024832	0.025634027	0.028167769	NA	NA	NA	Lethal	NA	1.0064	0.97349	22	6	250.5	Y	-22	1	0.002463054	4	16	200	38	178	229	-275	YES	UNCLEAR	94705	0.38163	0.143678161	2.53E-05	1.81E-05	3.05E-05	NA	3	NA	0.05352364	60
YLR142W	PUT1	chrXII	425186	426616	+	HT	412	58	1431	67341	26817	94158	1	YES	SAGA	TATA-containing	0	TAF1-enriched	-4.094736842	1.92E-05	NA	NA	NA	NA	NA	NA	0.512420177	15	NA	NA	6.321849655	0.218530053	0.073945444	NA	NA	NA	Lethal	NA	1.01692	NA	NA	18	199.2	N	-108	0	0	2	37	433	145	325	470	-38	YES	DPN	425186	4.7089	0.091954023	0.00078963	0.000124005	0.000405541	0.000376842	2	NA	0.041958042	60
YJR135C	MCM22	chrX	676059	676778	-	HH	193	16	720	13587	5844	19431	0	NO	TFIID	NA	NA	NA	-0.063545151	0.890694581	NA	NA	NA	NA	NA	NA	0.052733525	16	NA	NA	6.07933128	0.018337873	0.022275049	NA	NA	NA	Lethal	NA	1.01442	NA	49	27	276.3	N	-44	1	0.005181347	4	25	182	69	138	207	-50	UNCLEAR	UNCLEAR	68973	0.24459	0.040229885	2.62E-05	7.58E-06	1.38E-05	3.12E-05	1	NA	0.084144645	60.5
YPR046W	MCM16	chrXVI	656799	657344	+	HH	247	13	546	13134	5293	18427	0	NO	TFIID	TATA-less	1	TAF1-depleted	0.583333333	0.126686365	NA	NA	NA	NA	NA	NA	0.120448118	17	1.91	0.055083	6.772395128	0.026721916	0.024137457	NA	NA	NA	Lethal	NA	1.01251	NA	NA	14	280.1	N	-64	1	0.004048583	4	193	2	62	189	251	-77	YES	DPN	290722	0.35177	0.025862069	6.76E-05	1.98E-05	5.90E-05	2.74E-05	1	NA	0.111926606	61
YDR320C-A	DAD4;HSK2	chrIV	1108280	1108498	-	HH	204	2	219	1185	711	1896	0	NO	NA	NA	NA	NA	NA	1	NA	NA	NA	NA	NA	NA	0.061520728	17	0.741	0.742589	7.558346284	0.073888542	0.035963485	128	22.59	0.124	Essential	Essential	NA	NA	NA	42	146.1	N	0	0	0	4	50	215	50	215	265	-25	YES	DPN	423435	NA	NA	6.29E-05	2.91E-05	8.15E-05	5.56E-05	NA	NA	0.279816514	61
YBL071W-A	KTI11;DPH3	chrII	89978	90226	+	HH	422	8	249	6891	2213	9104	0	NO	NA	TATA-less	1	TAF1-enriched	-2.333333333	0.137434946	NA	NA	NA	NA	NA	NA	0.130566167	17	1.033	0.449011	6.770534679	0.043429155	0.030779937	825.5	13.875	-1.551	Lethal	NA	NA	NA	NA	51	190.2	N	-43	2	0.004739336	3	160	9	34	121	403	-239	YES	UNCLEAR	89978	NA	NA	0.000101693	6.01E-05	5.17E-05	3.46E-05	NA	NA	0.245967742	61
YLR081W	GAL2;IMP1	chrXII	290212	291936	+	HT	962	55	1725	51162	22949	74111	2	YES	TFIID	NA	NA	NA	-6.496503497	0.000449124	G+E	40.52592	0	6.994266	2.968444	0.008544331	0.278417287	15	NA	NA	3.145434967	0.718775758	0.269535517	NA	NA	NA	Lethal	NA	1.01319	NA	55	217	114	Y	NA	3	0.003118503	1	176	216	NA	NA	NA	NA	NA	NA	290212	1.6259	0.083333333	0.000104663	6.57E-05	0.000128289	0.000130067	1	NA	0.035382831	61
YNL204C	SPS18;SPX18	chrXIV	258375	259277	-	HH	301	31	903	33687	13158	46845	0	NO	TFIID	NA	NA	NA	-1.98245614	0.008730636	NA	NA	NA	NA	NA	NA	0.63814243	17	5.488	0.000101	4.770473583	0.067208314	0.0543438	NA	NA	NA	Lethal	NA	1.04751	NA	NA	1	134.8	Y	NA	1	0.003322259	3	1	260	NA	NA	261	-74	YES	DPN	258375	0.24581	0.063218391	NA	NA	NA	3.00E-05	3	NA	0.067627494	61
YLR390W	ECM19	chrXII	903066	903404	+	HH	406	27	339	18969	6638	25607	0	NO	TFIID	TATA-less	1	TAF1-enriched	-0.84	0.432232016	NA	NA	NA	NA	NA	NA	0.129689718	17	1.784	0.068036	6.673126512	0.0556071	0.035337495	49	NA	NA	Lethal	NA	1.00007	NA	NA	22	313.1	N	60	1	0.002463054	3	128	125	68	185	286	-200	YES	UNCLEAR	174773	0.29141	0.020114943	1.15E-05	3.03E-05	1.61E-05	4.55E-05	2	NA	0.181952663	61.5
YOL154W	ZPS1	chrXV	34658	35407	+	HH	3052	47	750	53418	23769	77187	1	YES	SAGA/TFIID	NA	NA	NA	NA	NA	NA	NA	NA	NA	NA	NA	0.463455596	14	NA	NA	7.823535242	0.269538941	0.066360204	NA	NA	NA	Lethal	NA	NA	NA	NA	10	107.4	N	-275	17	0.005570118	5	75	109	166	3	184	0	NO	OPN	34658	0.27114	NA	0.000163211	5.71E-05	0.000128138	4.05E-05	3	NA	0.082109479	61.5
YHR167W	THP2	chrVIII	439342	440127	+	HH	292	11	786	9801	1836	11637	0	NO	TFIID	TATA-less	2	TAF1-enriched	0	1	G+E	40.52592	0	6.994266	2.968444	0.008544331	0.067461676	17	0.929	0.55237	6.276249392	0.014052097	0.018887321	NA	NA	NA	Lethal	NA	1.01612	1.00588	136	17	153.5	N	-49	2	0.006849315	4	158	16	33	222	255	-91	YES	DPN	122516	0.30606	0.077586207	0.000120049	6.96E-05	0.000107429	2.46E-05	2	NA	0.078343949	61.5
YJL153C	INO1	chrX	134332	135933	-	HT	439	84	1602	81717	40744	122461	3	YES	TFIID	NA	NA	NA	-1.098979592	0.043990891	NA	NA	NA	NA	NA	NA	2.386283954	12	NA	NA	7.128279406	0.303285445	0.077257575	NA	NA	NA	Lethal	NA	1.03909	NA	NA	3	229.2	N	NA	2	0.004555809	3	5	136	NA	NA	211	-211	UNCLEAR	UNCLEAR	134332	1.9103	0.043103448	3.05E-05	0.000151406	0.000733391	0.000171788	1	NA	0.038413492	61.5
YNR010W	CSE2;MED9	chrXIV	643744	644193	+	HT	305	20	450	30606	7060	37666	0	NO	TFIID	NA	NA	NA	-0.118881119	0.859326114	NA	NA	NA	NA	NA	NA	0.044634563	17	1.172	0.331777	6.119158261	0.050902355	0.036870349	NA	NA	NA	Lethal	NA	0	NA	423	39	277.4	N	-18	1	0.003278689	4	42	245	60	227	287	-33	YES	DPN	140140	0.28307	0.066091954	NA	NA	NA	0.000117844	2	NA	0.136971047	61.5
YPR153W	YPR153W	chrXVI	833689	834245	+	HH	231	18	423	18963	6483	25446	0	NO	TFIID	TATA-less	1	TAF1-enriched	-0.306122449	0.706549059	NA	NA	NA	NA	NA	NA	1.447829036	17	4.752	0.000311	4.729950318	0.040342168	0.042464209	NA	NA	NA	Lethal	NA	1.01216	1.03305	NA	1	352.4	N	-48	0	0	4	2	255	50	207	257	-73	YES	DPN	113821	0.54006	0.017241379	5.66E-05	3.62E-05	6.12E-05	1.66E-05	3	NA	0.111510791	62
YHR210C	YHR210C	chrVIII	520712	521737	-	HH	3655	30	1026	33120	17166	50286	0	NO	TFIID	TATA-less	1	TAF1-depleted	NA	NA	NA	NA	NA	NA	NA	NA	0.1191254	17	0.464	0.94941	5.47493108	0.128300954	0.065423878	NA	NA	NA	Lethal	NA	1.01349	1.01957	NA	12	202.1	Y	-79	19	0.005198358	3	48	122	127	43	337	-197	YES	UNCLEAR	40906	0.44548	0.077586207	0.000165566	6.30E-05	0.000189092	3.07E-05	1	NA	0.06097561	62.5
YDR317W	HIM1	chrIV	1102184	1103428	+	HT	7006	27	1245	31650	11556	43206	0	NO	NA	NA	NA	NA	-0.661016949	0.183326978	NA	NA	NA	NA	NA	NA	0.176311525	16	NA	NA	3.121999971	0.454283922	0.215889136	NA	NA	NA	Lethal	NA	1.011	1.01417	NA	5	115	N	-23	33	0.004710248	3	159	40	182	17	252	-115	YES	DPN	428505	0.2647	0.08908046	2.36E-05	7.53E-06	1.93E-05	7.50E-06	3	NA	0.050643087	63
YHR059W	FYV4	chrVIII	220108	220500	+	HH	224	11	393	11391	3438	14829	0	NO	TFIID	NA	NA	NA	-2.571428571	0.059889699	NA	NA	NA	NA	NA	NA	0.347314036	17	1.115	0.376446	6.920183754	0.043158729	0.030020415	54.5	NA	NA	Lethal	NA	0.81212	0.97554	NA	24	120.3	N	-52	0	0	3	2	234	54	182	236	-73	YES	DPN	220108	0.38767	0.040229885	7.16E-05	6.78E-05	7.85E-05	4.27E-05	3	NA	0.160714286	63
YBR020W	GAL1	chrII	279021	280607	+	HH	669	39	1587	40659	22749	63408	1	YES	NA	NA	NA	NA	NA	1	G+E	40.52592	0	6.994266	2.968444	0.008544331	1.027467847	16	NA	NA	4.92628805	0.221528531	0.095542155	NA	NA	NA	Lethal	NA	0.99447	NA	NA	270	139.1	Y	NA	3	0.004484305	3	71	71	NA	NA	160	-146	NO	OPN	279021	2.5992	0.195402299	NA	NA	NA	3.86E-06	2	NA	0.039722573	63
YEL048C	TCA17	chrV	64709	65167	-	HT	218	12	459	10635	3729	14364	0	NO	TFIID	TATA-less	1	TAF1-enriched	0.007352941	0.990921978	G+E	40.52592	0	6.994266	2.968444	0.008544331	0.149249768	17	1.04	0.446842	6.204195015	0.018348599	0.021833131	72	25.745	-0.021	Lethal	NA	0.992	0.98295	NA	29	122.4	N	-21	0	0	4	3	242	24	221	245	-72	YES	DPN	64709	0.31537	0.063218391	NA	NA	NA	9.13E-05	1	NA	0.137554585	63
YFR027W	ECO1;CTF7	chrVI	207452	208297	+	HH	1195	17	846	20799	7096	27895	0	NO	TFIID	NA	NA	NA	0.295652174	0.434916894	NA	NA	NA	NA	NA	NA	0.255376049	17	1.134	0.391387	5.584325081	0.025421669	0.028551658	NA	NA	NA	Essential	Essential	0	NA	NA	1	124.5	N	-66	6	0.005020921	3	136	26	40	198	238	-101	YES	DPN	61864	0.33057	0.068965517	2.62E-05	2.12E-05	0.000239264	6.35E-05	1	NA	0.075147929	63.5
YNL259C	ATX1	chrXIV	157644	157865	-	HT	244	53	222	54513	21008	75521	0	NO	SAGA/TFIID	TATA-less	2	TAF1-enriched	0.407407407	0.660279565	NA	NA	NA	NA	NA	NA	0.195517034	17	3.708	0.000338	8.923269564	0.049606555	0.024960054	89.5	24.705	0.368	Lethal	NA	0.9469	NA	100	51	143.5	N	-29	1	0.004098361	5	13	99	42	70	191	-479	NA	NA	157644	1.0103	0.077586207	0.000108994	3.48E-05	2.30E-05	0.000265352	2	NA	0.287330317	63.5
YNL328C	MDJ2	chrXIV	22834	23274	-	HH	774	21	441	21504	7789	29293	0	NO	TFIID	TATA-less	1	TAF1-enriched	1	0.152516516	NA	NA	NA	NA	NA	NA	0.08301292	15	NA	NA	4.801802879	0.095003876	0.064189846	58.5	NA	NA	Lethal	NA	1.05852	NA	26	7	99.8	N	-71	3	0.003875969	3	28	196	99	125	224	-47	UNCLEAR	UNCLEAR	22834	0.21084	0.011494253	0.000188884	0.000237958	5.29E-05	7.73E-05	3	NA	0.144318182	63.5
YJL218W	YJL218W;HRA196;J0224	chrX	21973	22563	+	HT	773	41	591	30654	15953	46607	0	NO	TFIID	NA	NA	NA	NA	NA	NA	NA	NA	NA	NA	NA	1.291992465	10	NA	NA	3.720509984	1.960343803	0.3763255	NA	NA	NA	Lethal	NA	1.02511	0.99028	NA	19	199.6	N	-17	4	0.005174644	4	92	77	109	60	241	-152	YES	UNCLEAR	21973	0.44485	0.011494253	0.000762929	0.000836059	0.001598774	0.000866341	2	NA	0.107627119	63.5
YPL124W	SPC29;LPH3;NIP29	chrXVI	316755	317516	+	HT	269	31	762	36111	11653	47764	0	NO	TFIID	NA	NA	NA	-1.4	0.074950799	G+E	40.52592	0	6.994266	2.968444	0.008544331	0.130132054	17	1.334	0.235402	5.788943481	0.0269995	0.028384324	73	28.905	3.394	Essential	Essential	0	NA	NA	30	222.9	N	-31	1	0.003717472	4	2	253	33	222	255	-73	YES	DPN	316755	0.42	0.192528736	0.000805656	0.001886952	0.007055354	0.000101014	3	NA	0.083442838	63.5
YBR213W	MET8	chrII	650368	651192	+	HT	464	27	825	33276	12074	45350	0	NO	TFIID	NA	NA	NA	-1.714285714	0.028639574	NA	NA	NA	NA	NA	NA	0.579665504	13	NA	NA	6.122926503	0.07247642	0.043968264	NA	NA	NA	Lethal	NA	0.98922	NA	NA	17	123.7	N	-152	2	0.004310345	3	107	60	92	181	273	-135	YES	DPN	161992	0.83536	0.005747126	NA	NA	NA	8.42E-05	1	NA	0.077063107	63.5
YGL226W	MTC3	chrVII	73340	73711	+	HH	182	28	372	26811	19425	46236	0	NO	TFIID	NA	NA	NA	-1.454545455	0.187093969	NA	NA	NA	NA	NA	NA	0.240496483	17	4.38	9.00E-05	6.929668369	0.047687293	0.031512937	NA	NA	NA	Lethal	NA	0.99097	0.9951	NA	25	83	N	-5	1	0.005494505	4	208	15	213	10	200	-420	NA	NA	73340	0.27073	0.034482759	NA	NA	NA	0.000324087	2	NA	0.17115903	63.5
YLR099W-A	YLR099W-A	chrXII	341325	341588	+	HH	397	0	264	0	0	0	0	NO	NA	TATA-less	2	TAF1-enriched	-1.266666667	0.442107636	NA	NA	NA	NA	NA	NA	0.098850421	17	1.348	0.213507	7.104066217	0.091233163	0.042517661	NA	NA	NA	Essential	Essential	NA	NA	NA	50	165.1	N	-34	2	0.005037783	3	625	232	659	198	164	-444	NA	NA	341325	NA	NA	4.65E-05	1.42E-05	3.90E-05	0.000111152	NA	NA	0.243346008	64
YER179W	DMC1;ISC2	chrV	548421	549517	+	HT	342	20	1005	21423	9067	30490	1	YES	TFIID	NA	NA	NA	-1.84	0.318262936	NA	NA	NA	NA	NA	NA	0.463749524	15	NA	NA	3.518382142	0.06459832	0.072238315	NA	NA	NA	Lethal	NA	1.02519	NA	NA	NA	134.9	Y	NA	2	0.005847953	4	59	48	NA	NA	187	-123	NO	OPN	27357	0.61848	0.017241379	0.000154787	2.52E-05	9.86E-05	1.65E-05	2	NA	0.058394161	64
YBR296C	PHO89;ITN1	chrII	796798	798522	-	HT	1601	121	1725	121038	43554	164592	2	YES	NA	TATA-containing	0	TAF1-depleted	NA	NA	NA	NA	NA	NA	NA	NA	1.794488021	17	3.976	0.000285	9.011167428	0.302961423	0.06108191	NA	NA	NA	Lethal	NA	1.01261	NA	NA	87	244.8	N	-66	9	0.005621487	3	139	23	43	105	341	-246	YES	UNCLEAR	14662	3.9317	0.106321839	0.000116842	6.99E-05	0.000447084	0.000231248	3	NA	0.03712297	64
YOR114W	YOR114W;O3248;YOR3248w	chrXV	537570	538454	+	HT	751	18	885	20256	8459	28715	0	NO	TFIID	NA	NA	NA	-3.384615385	0.001946387	NA	NA	NA	NA	NA	NA	0.068470907	16	NA	NA	6.298158307	0.02885919	0.026972953	NA	NA	NA	Lethal	NA	1.01408	0.97928	36	12	325.7	N	-161	4	0.005326232	3	173	6	155	6	276	-242	YES	UNCLEAR	537570	0.39791	0.063218391	0.00011407	0.000153835	0.000273204	0.000132982	3	NA	0.07239819	64
YDR078C	SHU2	chrIV	602198	602869	-	HH	195	15	672	10854	6103	16957	0	NO	TFIID	TATA-less	2	TAF1-depleted	-1.333333333	0.142532565	NA	NA	NA	NA	NA	NA	0.238918064	17	2.213	0.026171	6.215760033	0.02439462	0.025127703	NA	NA	NA	Lethal	NA	1.04779	1.00339	NA	22	104.7	N	-17	0	0	3	25	216	42	199	241	-50	YES	DPN	602198	0.19239	0.022988506	NA	NA	NA	0.00111733	2	NA	0.09538003	64
YCR020C-A	MAK31;NAA38	chrIII	154830	155096	-	HH	224	19	267	17490	6221	23711	0	NO	TFIID	NA	NA	NA	-2.428571429	0.096484512	NA	NA	NA	NA	NA	NA	0.059621637	17	0.785	0.696475	7.386001345	0.051104669	0.03060701	NA	NA	NA	Lethal	NA	1.03065	NA	NA	50	289.1	N	-18	0	0	4	39	232	57	214	271	-36	YES	DPN	154830	0.19028	0.051724138	0.000126465	3.11E-05	4.19E-05	0.002140029	2	NA	0.242481203	64.5
YIR009W	MSL1	chrIX	374525	374860	+	HH	219	19	336	19008	3974	22982	0	NO	TFIID	NA	NA	NA	-0.425	0.676907636	NA	NA	NA	NA	NA	NA	0.049983431	17	0.396	0.974742	6.215910837	0.032846202	0.029156662	NA	NA	NA	Lethal	NA	0.88537	NA	NA	19	140	N	-63	1	0.00456621	4	136	6	57	177	234	-81	YES	DPN	65028	0.26105	0.112068966	2.63E-05	5.70E-05	7.05E-06	5.97E-05	3	NA	0.192537313	64.5
YHR050W-A	YHR050W-A	chrVIII	209475	209645	+	HT	172	5	171	4536	3326	7862	NA	NA	NA	TATA-less	1	TAF1-depleted	NA	NA	NA	NA	NA	NA	NA	NA	NA	NA	NA	NA	7.772793542	0.059721244	0.031440344	NA	NA	NA	Lethal	NA	NA	NA	NA	1	120.8	N	NA	1	0.005813953	5	96	82	NA	NA	178	-157	NO	OPN	209475	NA	NA	0.000237508	0.000153194	5.01E-05	NA	NA	NA	0.379411765	64.5
YAR035W	YAT1	chrI	190193	192256	+	HT	1382	47	2064	57774	21223	78997	1	YES	SAGA/TFIID	NA	NA	NA	NA	NA	NA	NA	NA	NA	NA	NA	0.380964356	16	NA	NA	4.57706448	0.377526879	0.134241535	NA	NA	NA	Lethal	NA	1.0047	NA	NA	1	111	Y	NA	8	0.005788712	3	292	220	NA	NA	173	-295	NO	OPN	37962	0.33146	0.07183908	9.19E-05	1.19E-05	4.63E-05	7.02E-06	2	NA	0.031507513	65
YLR213C	CRR1	chrXII	566654	567922	-	HH	645	41	1269	37749	13929	51678	0	NO	TFIID	TATA-less	2	TAF1-enriched	-0.064130435	0.880638893	G+E	40.52592	0	6.994266	2.968444	0.008544331	0.461057656	16	NA	NA	4.576604494	0.090564738	0.065756121	NA	NA	NA	Lethal	NA	1.0207	NA	23	19	187.6	Y	-155	3	0.004651163	4	18	301	173	146	319	-57	YES	DPN	510255	0.21058	0.094827586	5.04E-05	4.10E-05	0.000171656	0.000152585	1	NA	0.05126183	65
YNL122C	YNL122C;N1901	chrXIV	398023	398370	-	HT	314	18	348	23655	10822	34477	0	NO	TFIID	TATA-containing	0	TAF1-enriched	-1.666666667	0.244508548	G+E	40.52592	0	6.994266	2.968444	0.008544331	0.11591563	17	1.793	0.066463	7.527470763	0.044087376	0.027893823	NA	NA	NA	Lethal	NA	0.9915	0.98942	81	NA	156.7	N	28	1	0.003184713	4	86	218	58	246	304	11	YES	DPN	385963	0.31953	0.077586207	2.52E-05	4.59E-05	8.87E-05	NA	3	NA	0.187319885	65
YJR022W	LSM8	chrX	469784	470113	+	HH	205	18	330	19947	5847	25794	NA	NA	TFIID	TATA-less	2	TAF1-enriched	NA	NA	NA	NA	NA	NA	NA	NA	0.050976981	17	2.073	0.037376	6.012539705	0.043650204	0.034748429	NA	NA	NA	Essential	Essential	0	NA	NA	NA	222.8	N	-28	0	0	4	18	276	46	248	294	-57	YES	DPN	275638	0.13351	0.054597701	NA	NA	NA	0.000437306	1	NA	0.197568389	65
YGL240W	DOC1;APC10	chrVII	48613	49365	+	HT	154	21	753	17610	5635	23245	0	NO	TFIID	NA	NA	NA	-1.470588235	0.136801593	NA	NA	NA	NA	NA	NA	0.304881463	8	NA	NA	4.512295689	0.028156655	0.037187157	NA	NA	NA	Lethal	NA	0.49364	NA	NA	8	170.9	N	-19	1	0.006493506	5	44	123	63	104	172	-318	NO	OPN	48613	0.11567	0.017241379	3.74E-05	1.60E-05	2.23E-05	1.05E-05	3	NA	0.087101064	65.5
YIL102C-A	YIL102C-A	chrIX	173365	173592	-	HT	990	0	228	0	0	0	NA	NA	NA	TATA-less	1	TAF1-enriched	NA	NA	NA	NA	NA	NA	NA	NA	NA	NA	NA	NA	6.139302995	0.036694433	0.031201899	NA	NA	NA	NA	NA	NA	NA	NA	NA	258.7	NA	-34	5	0.005050505	3	9	304	43	270	313	-66	YES	DPN	173365	NA	NA	0.00011049	2.77E-05	2.56E-05	NA	NA	NA	0.288546256	65.5
YCL012C	YCL012C;YCL011C-A	chrIII	101317	101788	-	HT	287	3	405	6825	3383	10208	NA	NA	NA	NA	NA	NA	-1.566666667	0.130726746	NA	NA	NA	NA	NA	NA	NA	NA	NA	NA	6.314130671	0.040643278	0.031928668	NA	NA	NA	Lethal	NA	NA	NA	NA	60	127.1	N	-34	1	0.003484321	3	7	253	41	219	260	-68	YES	DPN	101317	NA	NA	6.33E-05	3.06E-05	2.50E-05	NA	NA	NA	0.139065817	65.5
YDL200C	MGT1	chrIV	100501	101067	-	HT	223	12	567	17754	6029	23783	0	NO	TFIID	NA	NA	NA	-0.845	0.263406582	G+E	40.52592	0	6.994266	2.968444	0.008544331	0.106592283	17	1.694	0.087171	7.11644212	0.014365754	0.016842296	NA	NA	NA	Lethal	NA	0.98692	NA	NA	20	326.6	N	-36	1	0.004484305	4	14	208	50	172	222	-61	UNCLEAR	UNCLEAR	100501	0.36845	0.040229885	9.10E-05	3.95E-05	1.36E-05	0.000131552	3	NA	0.115724382	65.5
YOR284W	HUA2	chrXV	848478	849209	+	HT	333	20	732	19902	10793	30695	0	NO	TFIID	TATA-less	2	TAF1-enriched	-1.88986014	0.005034697	NA	NA	NA	NA	NA	NA	0.638485615	16	NA	NA	6.284654009	0.029932816	0.027529125	NA	NA	NA	Lethal	NA	1.06736	NA	NA	14	193.9	N	-47	2	0.006006006	4	139	14	33	221	254	-89	YES	DPN	242082	0.15072	0	5.51E-05	0.000106308	8.74E-05	0.000783982	3	NA	0.090287278	66
YBR184W	YBR184W;YBR1306	chrII	597363	598934	+	HT	298	20	1572	28896	12346	41242	3	YES	TFIID	NA	NA	NA	0.228571429	0.309185752	NA	NA	NA	NA	NA	NA	0.429865952	15	NA	NA	4.37914687	0.037085521	0.043975692	NA	NA	NA	Lethal	NA	1.00729	1.00789	NA	2	306.7	N	0	1	0.003355705	4	8	267	8	267	275	-67	YES	DPN	214250	0.37947	0.020114943	0.00055521	0.000923368	0.00367569	0.00019817	3	NA	0.042647995	67
YAR031W	PRM9	chrI	186836	187732	+	HT	291	42	897	50718	27996	78714	0	NO	NA	NA	NA	NA	NA	NA	G+E	40.52592	0	6.994266	2.968444	0.008544331	2.322643576	13	NA	NA	2.718435141	0.484500444	0.256051965	NA	NA	NA	Lethal	NA	1.00253	NA	NA	NA	120.1	Y	161	2	0.006872852	4	148	41	96	13	170	-435	NA	NA	42486	0.24243	0.031609195	NA	NA	NA	0.000187702	2	NA	0.074776786	67
YPL272C	YPL272C	chrXVI	26611	28164	-	HH	1915	29	1554	34410	11564	45974	1	YES	TFIID	NA	NA	NA	-1.476658477	0.015337991	G+E	40.52592	0	6.994266	2.968444	0.008544331	0.085371782	15	NA	NA	5.26867503	0.057884681	0.045664679	NA	NA	NA	Lethal	NA	1.00087	0.97616	NA	1	150.2	N	NA	11	0.005744125	4	79	46	NA	NA	261	-294	YES	UNCLEAR	26611	0.51047	0.103448276	NA	NA	NA	0.000627621	2	NA	0.043142305	67
YGR213C	RTA1	chrVII	918512	919465	-	HH	1110	49	954	47394	36164	83558	1	YES	TFIID	TATA-less	2	TAF1-enriched	-1.621052632	0.014267715	NA	NA	NA	NA	NA	NA	0.269544718	17	1.44	0.172704	4.048100051	0.461396586	0.16779768	NA	NA	NA	Lethal	NA	1.02079	NA	14	1	119	Y	-395	6	0.005405405	3	168	2	182	12	211	-77	UNCLEAR	UNCLEAR	171475	0.54423	0.086206897	2.36E-05	1.19E-05	3.23E-05	9.58E-05	1	NA	0.070828961	67.5
YHL012W	YHL012W	chrVIII	78936	80417	+	HH	583	33	1482	35310	11382	46692	0	NO	TFIID	NA	NA	NA	-0.867848509	0.087104502	NA	NA	NA	NA	NA	NA	0.279112178	13	NA	NA	3.824683505	0.580375696	0.199186136	NA	NA	NA	Lethal	NA	1.00874	0.99486	NA	NA	125.8	Y	NA	2	0.003430532	3	28	166	NA	NA	215	-241	UNCLEAR	UNCLEAR	78936	0.50983	0.068965517	6.61E-05	7.00E-05	7.07E-05	6.25E-05	1	NA	0.045577313	67.5
YKR102W	FLO10	chrXI	646356	649865	+	HT	3852	47	3510	51000	21695	72695	0	NO	NA	NA	NA	NA	NA	1	G+E	40.52592	0	6.994266	2.968444	0.008544331	0.173644438	12	NA	NA	3.954039808	0.608074117	0.197213764	NA	NA	NA	Lethal	NA	1.02874	NA	NA	NA	153.5	Y	NA	21	0.005451713	4	102	131	NA	NA	160	-345	NO	OPN	16951	0.45071	0.020114943	NA	NA	NA	9.73E-06	3	NA	0.01923625	67.5
YPL258C	THI21	chrXVI	53498	55153	-	HH	8126	35	1656	38004	12618	50622	0	NO	TFIID	TATA-less	2	TAF1-enriched	-1.739463602	0.008962471	NA	NA	NA	NA	NA	NA	0.392415784	15	NA	NA	5.417904455	0.020822006	0.026633604	NA	NA	NA	Lethal	NA	0.99938	NA	NA	8	141.5	Y	-283	49	0.006030027	3	149	106	11	203	214	-347	UNCLEAR	UNCLEAR	53498	0.1532	0.020114943	NA	NA	NA	6.27E-05	1	NA	0.040785498	67.5
YCR086W	CSM1;SPO86	chrIII	263392	263964	+	HH	940	16	573	21357	9332	30689	0	NO	TFIID	TATA-less	2	TAF1-enriched	0.575757576	0.279815352	NA	NA	NA	NA	NA	NA	0.194702773	17	2.496	0.0179	6.06939914	0.032874547	0.029873368	NA	NA	NA	Lethal	NA	0.98726	1.00378	323	28	333.3	N	-44	4	0.004255319	4	10	203	54	159	213	-65	UNCLEAR	UNCLEAR	52656	0.16621	0.16091954	2.17E-05	1.83E-05	5.30E-05	8.47E-05	2	NA	0.118881119	68
YER039C	HVG1;YEM9	chrV	228456	229205	-	HT	58	25	750	24279	10391	34670	0	NO	TFIID	TATA-less	2	TAF1-enriched	-2.278846154	0.01762778	NA	NA	NA	NA	NA	NA	0.307356404	15	NA	NA	6.32622253	0.205821443	0.071713488	NA	NA	NA	Lethal	NA	1.01569	NA	NA	2	135	Y	-297	0	0	4	64	98	32	243	275	-340	YES	UNCLEAR	228456	0.53251	0.091954023	0.000283445	8.14E-05	0.000184809	0.000125888	1	NA	0.090787717	68
YMR025W	CSI1	chrXIII	323300	324187	+	HT	253	15	888	16566	7917	24483	1	YES	TFIID	NA	NA	NA	-2.007075472	0.014240606	NA	NA	NA	NA	NA	NA	0.168690797	14	NA	NA	5.80872175	0.032856618	0.031205479	NA	NA	NA	Lethal	NA	0.97753	0.97175	36	7	121.2	N	-7	1	0.003952569	4	25	124	32	117	223	-199	UNCLEAR	UNCLEAR	323300	0.3407	0.025862069	5.13E-05	2.98E-05	3.05E-05	0.00079451	3	NA	0.077226607	68.5
YNL289W	PCL1;HCS26	chrXIV	87897	88736	+	HT	657	134	840	153723	64094	217817	1	YES	TFIID	TATA-containing	0	TAF1-depleted	-2.222222222	0.024870299	G+E	40.52592	0	6.994266	2.968444	0.008544331	0.265313371	17	3.652	0.000505	7.797071638	0.017279455	0.016859065	NA	NA	NA	Lethal	NA	1.0304	NA	58	15	97.7	Y	-81	4	0.00608828	5	28	143	109	62	171	-47	NO	OPN	87897	0.27802	0.045977011	0.001758829	0.003668543	0.229316163	0.000324429	1	NA	0.081644815	68.5
YHR176W	FMO1	chrVIII	454229	455527	+	HT	522	24	1299	32592	11280	43872	0	NO	TFIID	NA	NA	NA	-1.177514793	0.024003274	G+E	40.52592	0	6.994266	2.968444	0.008544331	0.299497769	15	NA	NA	7.095720895	0.051718922	0.032050013	NA	NA	NA	Lethal	NA	1.02205	1.02842	32	4	166.2	N	-121	3	0.005747126	3	104	70	51	192	243	-145	YES	DPN	107116	0.57678	0.091954023	NA	NA	NA	2.22E-05	2	NA	0.052773498	68.5
YLR011W	LOT6	chrXII	169103	169678	+	HH	1301	24	576	20901	10445	31346	0	NO	TFIID	TATA-less	1	TAF1-enriched	-0.888111888	0.189396644	NA	NA	NA	NA	NA	NA	0.917495591	15	NA	NA	6.037708074	0.061278229	0.04099973	NA	NA	NA	Lethal	NA	1.01142	0.97569	NA	40	311.9	N	-68	7	0.005380477	4	120	51	17	129	176	-272	NO	OPN	169103	0.39981	0.045977011	7.95E-05	1.67E-05	3.75E-05	0.000335343	3	NA	0.12	69
YHR105W	YPT35	chrVIII	324766	325410	+	HT	374	12	645	18018	10243	28261	0	NO	TFIID	NA	NA	NA	-3.326530612	0.005572084	NA	NA	NA	NA	NA	NA	0.488971528	9	NA	NA	5.554373102	0.035584337	0.033962089	NA	NA	NA	Lethal	NA	1.02821	NA	NA	3	128.4	N	-97	2	0.005347594	4	129	35	62	164	226	-110	YES	DPN	237233	0.25915	0	0.000138695	5.00E-05	0.000452233	4.20E-05	2	NA	0.107142857	69
YNR069C	BSC5	chrXIV	761123	762592	-	HH	2783	29	1470	33879	13032	46911	0	NO	TFIID	TATA-less	2	TAF1-enriched	NA	NA	NA	NA	NA	NA	NA	NA	1.03008726	14	NA	NA	5.765796352	0.135270279	0.063788427	NA	NA	NA	Lethal	NA	1.0082	1.00703	NA	1	177.9	Y	-241	14	0.005030543	2	122	53	25	505	163	-128	NO	OPN	21741	1.2604	0.025862069	0.000290824	0.000249952	0.000327584	0.000572755	1	NA	0.046970728	69
YMR156C	TPP1	chrXIII	570300	571016	-	HT	261	10	717	14340	6373	20713	0	NO	TFIID	NA	NA	NA	-1.166666667	0.101432619	NA	NA	NA	NA	NA	NA	0.204122177	16	NA	NA	5.328214501	0.029658625	0.032321671	NA	NA	NA	Lethal	NA	0.95927	NA	NA	15	135.8	N	-30	1	0.003831418	4	60	171	90	141	231	-15	YES	DPN	353415	0.21017	0.094827586	4.24E-05	1.28E-05	5.77E-05	0.000669315	3	NA	0.097067039	69.5
YDR493W	MZM1;AIM8;FMP36	chrIV	1436217	1436588	+	HT	343	15	372	10836	2891	13727	0	NO	TFIID	TATA-less	2	TAF1-enriched	-2.2	0.08133798	NA	NA	NA	NA	NA	NA	0.09812167	17	1.167	0.333274	7.349247771	0.044405267	0.02867308	NA	NA	NA	Lethal	NA	0.99936	1.00439	NA	46	102.5	N	-88	2	0.005830904	4	135	18	70	205	275	-93	YES	DPN	95345	0.19271	0.045977011	4.92E-05	3.04E-05	1.40E-05	2.93E-05	2	NA	0.187331536	69.5
YFL003C	MSH4	chrVI	134521	137157	-	HT	7957	23	2637	29859	12197	42056	0	NO	TFIID	NA	NA	NA	-2.72675737	4.39E-06	NA	NA	NA	NA	NA	NA	2.193347619	7	NA	NA	3.451026865	0.057341206	0.069388112	NA	NA	NA	Lethal	NA	1.04463	NA	NA	NA	72.4	Y	1266	40	0.00502702	4	167	2	46	249	259	-227	YES	UNCLEAR	133004	0.22708	0.034482759	0.000171652	3.80E-05	2.59E-05	3.38E-05	2	NA	0.026365706	69.5
YLR128W	DCN1	chrXII	398530	399433	+	HH	211	26	810	28314	8443	36757	0	NO	TFIID	NA	NA	NA	-0.095238095	0.870895536	NA	NA	NA	NA	NA	NA	0.047386667	17	0.879	0.60026	5.771730028	0.014442787	0.020821858	NA	NA	NA	Lethal	NA	1.02067	1.04215	NA	18	184.8	N	-48	1	0.004739336	4	8	191	56	143	224	-410	NA	NA	398530	0.48541	0.074712644	NA	NA	NA	7.72E-05	3	NA	0.07696567	69.5
YBR194W	AIM4;SOY1	chrII	610038	610409	+	HH	285	25	372	23169	10521	33690	0	NO	TFIID	NA	NA	NA	-1.437275986	0.053266222	NA	NA	NA	NA	NA	NA	0.09471264	17	1.216	0.306204	6.527171053	0.044044066	0.032152793	NA	NA	NA	Lethal	NA	0.65281	1.01878	NA	18	180.7	N	-69	1	0.003508772	3	162	74	231	5	251	-149	YES	DPN	202775	0.18881	0.135057471	4.40E-05	5.57E-06	6.67E-05	0.000104669	3	NA	0.188679245	70
YGR096W	TPC1	chrVII	676621	677565	+	HH	279	27	945	36312	12447	48759	0	NO	TFIID	TATA-less	2	TAF1-enriched	-0.722222222	0.253628306	NA	NA	NA	NA	NA	NA	0.045113629	17	4.234	9.10E-05	5.159759198	0.036497469	0.037025586	NA	NA	NA	Lethal	NA	1.0331	0.98001	NA	12	168.9	Y	-72	2	0.007168459	3	133	10	62	206	268	-85	YES	DPN	413375	0.25074	0	0.000218343	3.54E-05	4.39E-05	6.14E-05	1	NA	0.074152542	70
YAL063C	FLO9	chrI	24000	27968	-	HH	3599	36	3969	39690	17584	57274	0	NO	TFIID	NA	NA	NA	NA	NA	NA	NA	NA	NA	NA	NA	2.394252697	17	20.138	0	2.502363538	0.476307645	0.275799435	NA	NA	NA	NA	NA	NA	NA	33	NA	NA	NA	-243	18	0.005001389	4	13	171	72	131	203	-246	NO	OPN	24000	0.77152	NA	NA	NA	NA	5.65E-06	1	NA	0.017641129	70
YAR050W	FLO1;FLO2;FLO4;FLO8	chrI	205081	209694	+	HT	8896	59	4614	47688	18480	66168	2	YES	TFIID	NA	NA	NA	NA	NA	NA	NA	NA	NA	NA	NA	2.949431458	17	19.641	0	2.844046373	0.482264013	0.244177563	NA	NA	NA	Lethal	NA	0.99707	NA	NA	NA	200.9	Y	NA	54	0.006070144	4	121	64	NA	NA	181	-139	NO	OPN	20524	0.72012	0.045977011	NA	NA	NA	2.91E-05	1	NA	0.015174507	70
YKL183C-A	YKL183C-A	chrXI	98395	98607	-	HH	114	3	213	1605	1078	2683	NA	NA	NA	NA	NA	NA	NA	NA	NA	NA	NA	NA	NA	NA	NA	NA	NA	NA	3.531395754	0.058682044	0.068597174	NA	NA	NA	NA	NA	NA	NA	NA	NA	73.9	NA	NA	1	0.00877193	4	186	14	NA	NA	170	-89	NO	OPN	98395	NA	NA	NA	NA	NA	NA	NA	NA	0.330188679	70
YPR094W	RDS3	chrXVI	720637	720960	+	HH	213	12	324	15201	15055	30256	0	NO	TFIID	TATA-less	1	TAF1-enriched	-1.333333333	0.53607395	G+E	40.52592	0	6.994266	2.968444	0.008544331	0.042613804	16	NA	NA	6.276969747	0.031479414	0.02826593	NA	NA	NA	Essential	Essential	0	1.02678	NA	11	329.7	N	0	1	0.004694836	4	17	165	17	165	194	-240	NO	OPN	227106	0.11024	0.048850575	1.79E-05	3.69E-05	2.39E-05	3.00E-05	2	NA	0.218266254	70.5
YIL037C	PRM2	chrIX	283029	284999	-	HH	667	34	1971	41907	20138	62045	0	NO	TFIID	NA	NA	NA	-1.301369863	0.001178572	NA	NA	NA	NA	NA	NA	0.755866667	4	NA	NA	3.031707951	0.399631663	0.208517535	NA	NA	NA	Lethal	NA	1.03302	NA	NA	NA	179.3	N	-162	4	0.005997001	4	105	56	106	74	180	-131	NO	OPN	154889	0.2149	0.025862069	8.85E-05	4.65E-05	0.000199315	NA	2	NA	0.035786802	70.5
YGL175C	SAE2;COM1	chrVII	173285	174322	-	HH	223	15	1038	16044	5699	21743	0	NO	TFIID	NA	NA	NA	-0.475	0.330087713	NA	NA	NA	NA	NA	NA	0.298419571	15	NA	NA	4.991073995	0.029501899	0.034413669	NA	NA	NA	Lethal	NA	0.99947	NA	27	NA	136.6	N	NA	1	0.004484305	3	160	1	NA	NA	254	-76	YES	DPN	173285	0.25014	0.020114943	5.65E-05	4.86E-05	6.79E-05	0.02556614	3	NA	0.067984571	70.5
YMR063W	RIM9	chrXIII	397077	397796	+	HH	698	14	720	19239	7006	26245	0	NO	TFIID	TATA-less	1	TAF1-enriched	-6.8375	0.000269075	NA	NA	NA	NA	NA	NA	0.272223556	13	NA	NA	5.918803549	0.022203383	0.025175357	NA	NA	NA	Lethal	NA	0.9927	NA	187	14	134.9	N	-37	4	0.005730659	3	159	4	33	244	277	-79	YES	DPN	397077	0.24151	0.017241379	8.72E-05	7.47E-05	0.000113051	0.000235103	2	NA	0.098052851	70.5
YDL021W	GPM2	chrIV	413953	414888	+	HT	953	60	936	68079	26143	94222	1	YES	TFIID	NA	NA	NA	-0.719457014	0.37125554	G+E	40.52592	0	6.994266	2.968444	0.008544331	0.79832759	12	NA	NA	7.209195847	0.063038731	0.034827067	NA	NA	NA	Lethal	NA	1.02925	NA	NA	11	129.2	Y	-35	5	0.00524659	4	46	216	81	181	262	-29	YES	DPN	413953	2.5248	0.045977011	3.61E-05	0.000172614	2.72E-05	0.000351729	2	NA	0.07540107	70.5
YLR273C	PIG1	chrXII	689083	691029	-	HH	526	33	1947	31764	12450	44214	0	NO	TFIID	NA	NA	NA	0.099092559	0.692026419	NA	NA	NA	NA	NA	NA	0.205357495	13	NA	NA	5.122376982	0.016746146	0.025263057	NA	NA	NA	Lethal	NA	1.01015	NA	NA	10	188.1	Y	-229	3	0.005703422	4	102	88	141	7	178	-440	NA	NA	387148	0.62182	0.060344828	NA	NA	NA	1.08E-06	2	NA	0.03622816	70.5
YOR152C	YOR152C;O3536	chrXV	617518	618288	-	HH	1552	27	771	28437	18516	46953	0	NO	TFIID	NA	NA	NA	-3.472222222	0.003051666	NA	NA	NA	NA	NA	NA	0.054890038	14	NA	NA	6.647487184	0.103649579	0.048431315	NA	NA	NA	Lethal	NA	1.02417	1.00618	NA	19	124.1	N	-176	2	0.00128866	2	21	146	30	442	167	-54	NO	OPN	473003	1.243	0.014367816	6.33E-06	4.24E-06	4.89E-06	0.00013857	1	NA	0.092207792	71
YGL158W	RCK1	chrVII	207033	208571	+	HT	3200	42	1539	32919	19160	52079	1	YES	SAGA	NA	NA	NA	-0.209795918	0.480526398	NA	NA	NA	NA	NA	NA	0.327120982	8	NA	NA	3.248661563	0.22301076	0.145364527	NA	NA	NA	Lethal	NA	1.02491	NA	56	1	81.4	Y	NA	16	0.005	1	108	65	NA	NA	NA	NA	NA	NA	207033	0.4438	0	5.97E-05	0.000122252	7.05E-05	0.000422597	2	NA	0.046163849	71
YPL119C-A	YPL119C-A	chrXVI	324024	324287	-	HT	124	1	264	2436	672	3108	NA	NA	NA	NA	NA	NA	NA	NA	NA	NA	NA	NA	NA	NA	NA	NA	NA	NA	5.689700365	0.074960592	0.048120165	NA	NA	NA	Lethal	NA	NA	NA	NA	15	335.3	N	-108	1	0.008064516	4	158	4	104	23	187	-337	NO	OPN	324024	NA	NA	0.000146548	0.000176054	5.10E-05	NA	NA	NA	0.269961977	71
YDL160C-A	YDL160C-A	chrIV	169366	169608	-	HT	802	0	243	0	0	0	NA	NA	NA	TATA-less	1	TAF1-enriched	0.314285714	0.641380145	NA	NA	NA	NA	NA	NA	NA	NA	NA	NA	6.870205993	0.049995826	0.032545962	NA	NA	NA	Lethal	NA	NA	NA	NA	29	263.6	N	-28	4	0.004987531	4	35	177	63	149	229	-252	YES	UNCLEAR	169366	NA	NA	1.39E-05	9.03E-06	1.41E-05	NA	NA	NA	0.297520661	72
YDL049C	KNH1	chrIV	365068	365874	-	HT	865	48	807	48174	23060	71234	0	NO	TFIID	TATA-less	2	TAF1-depleted	-0.157894737	0.763271894	NA	NA	NA	NA	NA	NA	0.402704375	16	NA	NA	6.914115602	0.047462019	0.031509134	NA	NA	NA	Lethal	NA	1.03174	NA	NA	36	122.6	Y	-177	4	0.004624277	4	158	8	169	21	190	-83	NO	OPN	365068	0.64419	0.014367816	0.000177065	0.000113267	3.75E-05	0.000158379	1	NA	0.089330025	72
YLR042C	YLR042C	chrXII	229966	230451	-	HT	1251	83	486	85044	52587	137631	1	YES	SAGA/TFIID	NA	NA	NA	0.555555556	0.181034499	NA	NA	NA	NA	NA	NA	10.55897825	7	NA	NA	6.046730695	0.820587641	0.149810364	NA	NA	NA	Lethal	NA	0.99407	0.99205	30	14	132.5	N	-81	6	0.004796163	4	61	96	142	15	301	-171	YES	UNCLEAR	229966	0.90187	0.054597701	NA	NA	NA	0.000453106	1	NA	0.149484536	72.5
YDR125C	ECM18	chrIV	701397	702758	-	HH	476	27	1362	36240	14878	51118	0	NO	TFIID	NA	NA	NA	-0.402777778	0.398792896	NA	NA	NA	NA	NA	NA	0.339142447	14	NA	NA	5.086494831	0.029215222	0.033603614	NA	NA	NA	Lethal	NA	0.94534	NA	NA	1	155.6	Y	-119	2	0.004201681	4	78	86	33	191	224	-161	UNCLEAR	UNCLEAR	701397	0.44158	0.048850575	3.62E-05	2.57E-05	6.02E-05	8.04E-05	1	NA	0.053637032	73
YDR016C	DAD1	chrIV	478474	478758	-	HT	357	20	285	20175	9879	30054	3	YES	TFIID	TATA-less	2	TAF1-enriched	-6	0.023212666	G+E	40.52592	0	6.994266	2.968444	0.008544331	0.110280652	17	1.861	0.05295	7.145622073	0.011194504	0.01480684	91.5	23.275	-0.803	Essential	Essential	0	NA	NA	48	129.8	N	-33	1	0.00280112	3	15	275	48	242	290	-60	YES	DPN	478474	0.20608	0.094827586	0.000176193	6.02E-05	6.14E-05	0.000340999	3	NA	0.257042254	73
YFL030W	AGX1	chrVI	76831	77988	+	HT	684	48	1158	47097	19083	66180	3	YES	TFIID	NA	NA	NA	-1.33640553	0.055354134	NA	NA	NA	NA	NA	NA	0.398084924	15	NA	NA	7.353086621	0.292845177	0.073595177	NA	NA	NA	Lethal	NA	1.01259	0.98914	NA	4	135.6	N	-115	4	0.005847953	4	205	17	98	41	188	-231	NO	OPN	76831	2.2247	0.017241379	NA	NA	NA	9.16E-05	1	NA	0.063094209	73
YJL118W	YJL118W;J0742	chrX	191639	192298	+	HH	549	47	660	41949	15793	57742	0	NO	TFIID	TATA-containing	0	TAF1-enriched	-3.615384615	0.011607687	NA	NA	NA	NA	NA	NA	0.092165374	17	1.503	0.151617	5.719557292	0.031669663	0.031114248	NA	NA	NA	Lethal	NA	1.00203	0.99332	NA	6	355.1	N	45	3	0.005464481	5	90	95	45	140	254	-414	NA	NA	191639	0.8101	0.048850575	NA	NA	NA	1.62E-05	1	NA	0.1107739	73
YLR245C	CDD1	chrXII	626502	626930	-	HH	188	12	429	11754	3527	15281	0	NO	TFIID	TATA-less	2	TAF1-enriched	0.614583333	0.345098192	NA	NA	NA	NA	NA	NA	0.588364096	17	1.292	0.265277	6.427748877	0.018849484	0.021359488	118.5	22.165	-0.277	NA	NA	NA	NA	NA	NA	273.5	NA	-1	0	0	4	18	220	19	219	238	-57	YES	DPN	451247	0.15472	NA	NA	NA	NA	8.49E-05	2	NA	0.170560748	73
YDL098C	SNU23	chrIV	284581	285165	-	HT	226	15	585	17922	6447	24369	0	NO	TFIID	NA	NA	NA	-1.088	0.158383447	NA	NA	NA	NA	NA	NA	0.324099766	16	NA	NA	5.750523461	0.040556147	0.035020389	NA	NA	NA	Essential	Essential	0	NA	NA	10	145.5	N	-1	2	0.008849558	5	60	50	61	49	182	-443	NA	NA	284581	0.19601	0.063218391	1.07E-05	1.26E-05	3.68E-05	8.24E-05	1	NA	0.125856164	73.5
YML003W	YML003W;YM9571.16	chrXIII	263483	264355	+	HH	798	23	873	18444	6599	25043	3	YES	NA	TATA-less	1	TAF1-enriched	NA	NA	NA	NA	NA	NA	NA	NA	0.273059132	14	NA	NA	5.342287347	0.069869061	0.04947835	NA	NA	NA	Lethal	NA	1.03492	0.97228	NA	NA	107.3	N	12	3	0.003759398	3	26	213	14	225	239	-49	YES	DPN	263483	0.59996	0.054597701	1.48E-05	2.77E-05	6.80E-05	9.90E-05	3	NA	0.084862385	74
YNL138W-A	YSF3;RCP10	chrXIV	366033	366412	+	HH	316	2	258	1185	711	1896	NA	NA	NA	TATA-less	1	TAF1-enriched	-1.571428571	0.289316445	NA	NA	NA	NA	NA	NA	NA	NA	NA	NA	6.817480358	0.031660993	0.026099872	NA	NA	NA	Essential	Essential	NA	NA	NA	23	181.3	N	5	1	0.003164557	4	5	246	0	0	251	-70	YES	DPN	366033	NA	NA	5.83E-05	6.29E-05	5.83E-05	NA	NA	NA	0.19525066	74
YCR100C	YCR100C	chrIII	301271	302221	-	HT	261	18	951	21021	10013	31034	0	NO	SAGA	NA	NA	NA	NA	NA	NA	NA	NA	NA	NA	NA	0.947115506	15	NA	NA	5.295861052	0.051078833	0.042676019	NA	NA	NA	Lethal	NA	1.01729	0.99759	NA	NA	NA	Y	NA	2	0.007662835	5	89	50	NA	NA	185	-479	NA	NA	14399	0.42209	0.025862069	NA	NA	NA	4.50E-05	3	NA	0.077894737	74
YEL019C	MMS21;NSE2	chrV	120498	121301	-	HH	170	19	804	25191	9629	34820	0	NO	TFIID	NA	NA	NA	-0.361344538	0.494348345	NA	NA	NA	NA	NA	NA	0.088386368	14	NA	NA	4.736859358	0.104579983	0.068270612	62	27.235	0.161	Essential	Essential	0	NA	NA	NA	133	N	-10	0	0	4	35	196	45	186	231	-40	YES	DPN	120498	0.20471	0.068965517	1.84E-05	9.86E-06	4.92E-06	1.44E-05	2	NA	0.092777086	74.5
YNR037C	RSM19	chrXIV	695052	695327	-	HH	268	48	276	54432	17594	72026	3	YES	TFIID	TATA-less	2	TAF1-enriched	NA	0.027159853	G+E	40.52592	0	6.994266	2.968444	0.008544331	0.18564353	17	2.121	0.026621	7.834189035	0.055032959	0.029944522	NA	NA	NA	Lethal	NA	0.765	NA	NA	30	187.1	N	-36	0	0	3	0	0	36	254	290	-75	YES	DPN	89006	0.33775	0.077586207	2.26E-05	2.08E-05	0.000112396	0.000691526	1	NA	0.270909091	74.5
YBR284W	YBR284W;YBR2021	chrII	771239	773632	+	HH	824	25	2394	23790	10295	34085	0	NO	TFIID	TATA-less	1	TAF1-enriched	-0.186472039	0.529767208	NA	NA	NA	NA	NA	NA	0.209956688	16	NA	NA	4.46189513	0.02437063	0.034987589	NA	NA	NA	Lethal	NA	1.01651	1.00909	NA	NA	167.9	Y	-12	4	0.004854369	3	204	190	216	178	162	NA	NA	NA	39552	0.4988	0.195402299	4.68E-05	5.08E-05	2.39E-05	5.77E-05	3	NA	0.03113247	74.5
YNL202W	SPS19;SPX19	chrXIV	259578	260456	+	HH	301	24	879	33684	12697	46381	0	NO	TFIID	NA	NA	NA	-1.857142857	0.07978403	NA	NA	NA	NA	NA	NA	0.980985256	13	NA	NA	4.188556989	0.273345588	0.124822135	NA	NA	NA	Lethal	NA	1.04296	NA	NA	30	215	N	-22	1	0.003322259	3	111	41	133	19	261	-116	YES	DPN	259578	1.2546	0.066091954	4.02E-05	7.95E-05	0.000111205	5.52E-05	3	NA	0.084851936	74.5
YOR338W	YOR338W;O6265	chrXV	956898	957989	+	HT	275	49	1092	57861	19361	77222	0	NO	SAGA	NA	NA	NA	-2.407407407	0.006893499	NA	NA	NA	NA	NA	NA	0.30369973	16	NA	NA	5.080673926	0.075317012	0.054016348	NA	NA	NA	Lethal	NA	0.95859	0.98676	NA	6	209.2	Y	NA	2	0.007272727	5	70	50	NA	NA	183	-430	NA	NA	133302	0.73066	0.040229885	0.000199504	0.00010412	6.61E-05	0.001291644	3	NA	0.068285976	74.5
YJL214W	HXT8	chrX	26887	28596	+	HH	801	20	1710	28461	12060	40521	0	NO	TFIID	NA	NA	NA	NA	NA	NA	NA	NA	NA	NA	NA	1.387352083	12	NA	NA	4.985971324	0.589774449	0.154025703	NA	NA	NA	Lethal	NA	1.02298	NA	44	NA	243.9	Y	NA	4	0.004993758	3	154	7	NA	NA	182	-222	NO	OPN	26887	0.26254	0.045977011	NA	NA	NA	0.000506783	3	NA	0.043592744	74.5
YPR196W	YPR196W;P9677.4	chrXVI	931376	932788	+	HH	4439	25	1413	28497	12400	40897	0	NO	TFIID	NA	NA	NA	NA	NA	NA	NA	NA	NA	NA	NA	0.813157796	15	NA	NA	6.094874217	0.184243171	0.070425664	NA	NA	NA	Lethal	NA	1.0085	1.04177	NA	18	198.1	Y	-29	20	0.004505519	4	23	204	52	175	227	-52	YES	DPN	15278	0.20285	0.057471264	6.10E-05	1.88E-05	1.48E-05	0.000101744	2	NA	0.053116147	75
YOL128C	YGK3	chrXV	78352	79479	-	HH	869	32	1128	31539	13930	45469	0	NO	TFIID	TATA-less	2	TAF1-enriched	-0.593137255	0.271377342	G+E	40.52592	0	6.994266	2.968444	0.008544331	0.080641457	17	2.569	0.007616	5.597975334	0.039077963	0.035313029	NA	NA	NA	Lethal	NA	0.99228	1.00145	NA	12	215.7	Y	15	4	0.004602992	4	19	124	4	139	187	-372	NO	OPN	78352	0.60318	0.120689655	2.85E-05	7.06E-05	1.53E-05	2.92E-05	2	NA	0.066548358	75
YKR076W	ECM4;GTO2	chrXI	582283	583395	+	HH	1533	54	1113	62394	21489	83883	0	NO	SAGA	NA	NA	NA	-1.668896321	0.010640368	NA	NA	NA	NA	NA	NA	0.564656054	17	4.688	0.000124	6.680935818	0.071809466	0.040110082	NA	NA	NA	Lethal	NA	1.00346	NA	NA	28	294.7	Y	-295	7	0.00456621	5	99	60	72	124	196	-298	NO	OPN	83421	3.867	0.045977011	4.03E-05	7.61E-05	8.03E-05	0.00061425	1	NA	0.067446043	75
YER104W	RTT105	chrV	366802	367428	+	HT	285	10	627	9648	3850	13498	0	NO	TFIID	TATA-less	1	TAF1-enriched	-1.702857143	0.07900042	NA	NA	NA	NA	NA	NA	0.016096424	17	0.543	0.910545	6.302793229	0.012714397	0.017890185	NA	NA	NA	Essential	Essential	0	NA	NA	50	198	N	-41	1	0.003508772	4	26	219	67	178	245	-49	YES	DPN	209446	0.14978	0.043103448	NA	NA	NA	1.45E-05	1	NA	0.119808307	75
YFL056C	AAD6	chrVI	14793	15431	-	HH	1573	32	639	30690	9699	40389	2	YES	TFIID	NA	NA	NA	NA	NA	G+E	40.52592	0	6.994266	2.968444	0.008544331	1.206790532	15	NA	NA	5.537450185	0.718057723	0.153027628	NA	NA	NA	Lethal	NA	1.00508	NA	NA	NA	114.7	Y	-1061	9	0.005721551	5	70	52	42	238	162	-434	NA	NA	14793	1.0708	0.07183908	0.001419644	3.20E-05	0.000160977	0.00014393	3	NA	0.118338558	75.5
YFR036W	CDC26;HIT3;SCD26	chrVI	226963	227337	+	HH	498	32	375	38268	11942	50210	0	NO	TFIID	NA	NA	NA	0.285714286	0.69829883	NA	NA	NA	NA	NA	NA	0.170786748	17	1.281	0.265775	5.616127744	0.048044506	0.039028772	NA	NA	NA	Lethal	NA	1.03427	NA	NA	26	124.1	N	-22	2	0.004016064	2	294	73	316	51	420	-148	YES	DPN	42824	0.34516	0.020114943	2.05E-05	7.52E-05	1.33E-05	3.20E-05	1	NA	0.201871658	75.5
YMR084W	YMR084W	chrXIII	436628	437416	+	HT	713	45	789	47046	35124	82170	3	YES	NA	NA	NA	NA	-0.9875	0.091905256	G+E	40.52592	0	6.994266	2.968444	0.008544331	0.08957103	14	NA	NA	4.549482964	0.041936413	0.045012548	NA	NA	NA	Lethal	NA	1.0207	1.03285	NA	NA	114.3	Y	-265	4	0.005610098	4	82	69	25	231	256	-315	YES	UNCLEAR	436628	0.89469	0.132183908	0.000113907	0.000101524	0.000483376	0.003075791	1	NA	0.095812183	75.5
YOR378W	YOR378W	chrXV	1049511	1051058	+	HT	1708	43	1548	52443	20604	73047	0	NO	TFIID	NA	NA	NA	-7.431085044	5.92E-08	NA	NA	NA	NA	NA	NA	0.321415121	17	4.989	5.00E-05	3.466744784	0.309302206	0.16042411	NA	NA	NA	Lethal	NA	1.00524	0.94793	NA	6	156.1	Y	NA	10	0.005854801	4	63	83	NA	NA	203	-158	NO	OPN	40233	0.47061	0.002873563	1.23E-05	1.39E-05	3.92E-05	0.000294854	2	NA	0.049127343	76
YGR079W	YGR079W	chrVII	640720	641832	+	HH	349	80	1113	75762	30564	106326	0	NO	TFIID	TATA-less	1	TAF1-enriched	-1.092753623	0.058785853	G+E	40.52592	0	6.994266	2.968444	0.008544331	0.128983056	17	2.518	0.008426	7.089325763	0.02993924	0.024407059	NA	NA	NA	Lethal	NA	1.00787	1.0246	NA	NA	140.6	N	104	2	0.005730659	4	75	171	155	29	246	0	YES	DPN	449108	1.3535	0.043103448	1.46E-05	1.39E-05	9.93E-06	0.00047201	1	NA	0.068345324	76
YIR029W	DAL2;ALC1	chrIX	410807	411838	+	HT	432	25	1032	29472	13801	43273	0	NO	TFIID	NA	NA	NA	NA	NA	NA	NA	NA	NA	NA	NA	0.257079683	16	NA	NA	6.710635247	0.113978958	0.05030935	NA	NA	NA	Lethal	NA	1.03771	NA	NA	4	284.3	N	NA	2	0.00462963	4	77	79	NA	NA	228	-154	YES	UNCLEAR	28050	0.84718	0.031609195	NA	NA	NA	NA	3	NA	0.07371484	76
YLL060C	GTT2	chrXII	21138	21839	-	HH	1730	26	702	30912	12190	43102	0	NO	TFIID	TATA-containing	0	TAF1-enriched	NA	NA	G+E	40.52592	0	6.994266	2.968444	0.008544331	0.27989099	15	NA	NA	5.60848663	0.022154313	0.026538933	NA	NA	NA	Lethal	NA	1.01753	NA	NA	32	245.1	N	NA	11	0.006358382	4	209	19	NA	NA	189	-232	NO	OPN	21138	1.2146	0.07183908	NA	NA	NA	0.000390969	2	NA	0.108416548	76
YJL185C	ATG36	chrX	82095	82976	-	HH	472	22	882	27744	9753	37497	0	NO	TFIID	NA	NA	NA	-0.441441441	0.390317781	NA	NA	NA	NA	NA	NA	0.092036844	17	1.397	0.197288	5.771100715	0.045296776	0.036878648	NA	NA	NA	Lethal	NA	1.05032	0.98587	NA	13	314	N	NA	3	0.006355932	3	174	6	NA	NA	274	-81	YES	DPN	82095	0.82211	0.07183908	0.000122414	7.33E-05	4.38E-05	3.83E-06	1	NA	0.086833144	76.5
YLR456W	YLR456W	chrXII	1055070	1055684	+	HT	527	27	615	19941	6730	26671	1	YES	TFIID	NA	NA	NA	-1.980519481	0.052066605	NA	NA	NA	NA	NA	NA	0.104656183	17	1.16	0.34706	5.975551102	0.054009523	0.038891725	NA	NA	NA	Lethal	NA	1.0056	1.0324	NA	7	116.7	Y	-12	2	0.003795066	4	17	237	29	225	254	-58	YES	DPN	22493	0.20741	0.037356322	2.23E-05	2.07E-05	1.20E-05	0.000138238	3	NA	0.125407166	77
YGR239C	PEX21	chrVII	969187	970053	-	HT	718	19	867	26382	12223	38605	0	NO	SAGA	TATA-less	1	TAF1-enriched	0.044330776	0.900896196	G+E	40.52592	0	6.994266	2.968444	0.008544331	0.148897698	17	1.737	0.076347	7.013848932	0.05235664	0.032623419	NA	NA	NA	Lethal	NA	0.9991	NA	NA	23	118	N	-76	4	0.005571031	4	72	89	148	13	232	-164	YES	UNCLEAR	120887	0.64586	0.043103448	NA	NA	NA	3.49E-05	1	NA	0.08891455	77
YGR287C	IMA1	chrVII	1067222	1068991	-	HH	1302	36	1770	31368	14791	46159	0	NO	TFIID	NA	NA	NA	NA	NA	NA	NA	NA	NA	NA	NA	0.779231049	13	NA	NA	5.468283398	0.181023698	0.077806647	NA	NA	NA	Lethal	NA	1.02141	1.04145	NA	7	106.6	Y	-135	7	0.005376344	3	176	84	51	132	281	-342	YES	UNCLEAR	21949	0.69133	0.063218391	NA	NA	NA	9.73E-06	2	NA	0.043527417	77
YPL267W	ACM1	chrXVI	38169	38798	+	HT	324	26	630	23295	10612	33907	1	YES	TFIID	TATA-containing	0	TAF1-depleted	0.518716578	0.226072006	G+E	40.52592	0	6.994266	2.968444	0.008544331	0.054281938	17	0.717	0.767678	6.701683544	0.02451202	0.023361764	NA	NA	NA	Lethal	NA	1.02447	0.97583	NA	14	180.1	N	-15	2	0.00617284	4	171	17	186	2	241	-92	YES	DPN	38169	0.56213	0.045977011	NA	NA	NA	0.000216657	2	NA	0.122416534	77
YLR313C	SPH1	chrXII	760750	762342	-	HT	233	29	1593	20931	10425	31356	1	YES	TFIID	NA	NA	NA	-0.174825175	0.580832839	NA	NA	NA	NA	NA	NA	0.249195378	17	1.512	0.155788	5.960399153	0.012859011	0.019025165	NA	NA	NA	Lethal	NA	1.02964	NA	NA	13	269.6	N	-39	1	0.004291845	3	159	2	37	235	272	-77	YES	DPN	315835	0.26327	0.155172414	3.10E-05	6.48E-05	0.000105334	NA	2	NA	0.048680905	77.5
YGR053C	YGR053C	chrVII	594986	595837	-	HH	856	28	852	37872	16547	54419	0	NO	TFIID	NA	NA	NA	-0.54532967	0.297057135	NA	NA	NA	NA	NA	NA	0.857524722	10	NA	NA	5.154387963	0.071154327	0.051751573	NA	NA	NA	Lethal	NA	1.0307	1.0228	NA	5	140.1	N	-115	4	0.004672897	3	112	38	77	145	222	-113	UNCLEAR	UNCLEAR	495103	0.94762	0.037356322	0.000152049	0.000118263	8.92E-05	0.000429638	2	NA	0.09106933	77.5
YOR032C	HMS1	chrXV	389771	391075	-	HH	1101	66	1305	63693	40166	103859	0	NO	SAGA	NA	NA	NA	-1.757446809	0.001176304	G+E	40.52592	0	6.994266	2.968444	0.008544331	2.353071368	15	NA	NA	5.417469608	0.155753427	0.072848787	NA	NA	NA	Lethal	NA	1.02702	NA	NA	10	341.9	N	NA	3	0.002724796	3	20	250	NA	NA	270	-55	YES	DPN	389771	1.6963	0.091954023	0.000226881	0.000164343	0.000367281	0.000578772	3	NA	0.059432515	77.5
YKL161C	KDX1;MLP1	chrXI	149386	150687	-	HH	2582	63	1302	65412	18758	84170	0	NO	SAGA/TFIID	NA	NA	NA	NA	NA	NA	NA	NA	NA	NA	NA	0.929944052	17	7.345	1.00E-06	5.479239763	0.093911087	0.055929138	NA	NA	NA	Lethal	NA	1.00981	1.01162	NA	43	135	Y	-278	15	0.00580945	3	117	74	204	27	231	-149	YES	DPN	149386	0.4452	0.057471264	NA	NA	NA	0.001015494	3	NA	0.059569562	77.5
YDR540C	IRC4	chrIV	1517136	1517675	-	HT	1989	23	540	30141	25877	56018	0	NO	TFIID	NA	NA	NA	NA	NA	NA	NA	NA	NA	NA	NA	0.507907958	14	NA	NA	5.627310321	0.267394579	0.09189152	NA	NA	NA	Lethal	NA	0.9643	1.00526	NA	3	187.6	N	-83	12	0.006033183	4	194	45	38	108	189	-439	NA	NA	14258	0.32438	0.037356322	0.000197549	9.13E-05	0.000149674	0.000150397	2	NA	0.14471243	78
YBR255C-A	YBR255C-A	chrII	726618	727074	-	HT	312	7	363	3129	1465	4594	0	NO	NA	TATA-less	2	TAF1-enriched	0	1	NA	NA	NA	NA	NA	NA	0.045753416	17	0.853	0.627206	6.502929154	0.020306084	0.021913112	NA	NA	NA	NA	NA	NA	NA	NA	NA	175.4	NA	-24	1	0.003205128	4	18	233	42	209	251	-57	YES	DPN	86110	NA	NA	9.24E-05	8.00E-05	6.75E-05	7.22E-05	NA	NA	0.172149123	78.5
YMR169C	ALD3;ALD4	chrXIII	599352	600872	-	HT	690	145	1521	114687	49969	164656	0	NO	SAGA	NA	NA	NA	-1.017391304	0.164024853	G+E	40.52592	0	6.994266	2.968444	0.008544331	0.865333444	17	3.418	0.005308	5.267856544	0.446641943	0.126866165	NA	NA	NA	Lethal	NA	NA	NA	NA	6	115.5	Y	-266	2	0.002898551	2	14	447	280	181	461	-61	YES	DPN	323559	3.466	0.043103448	9.80E-05	0.000110042	0.000686304	0.002244476	3	NA	0.051644737	78.5
YLR004C	THI73	chrXII	157934	159505	-	HH	544	25	1572	29541	13656	43197	1	YES	TFIID	NA	NA	NA	-2.333333333	0.013123551	NA	NA	NA	NA	NA	NA	3.872326119	16	NA	NA	4.925051385	0.548905849	0.150431284	NA	NA	NA	Lethal	NA	0.99464	0.98315	27	6	224.7	Y	-311	3	0.005514706	4	81	65	23	232	255	-363	YES	UNCLEAR	157934	1.0717	0.066091954	0.000902454	0.000248945	2.30E-05	9.46E-05	3	NA	0.049968173	78.5
YOR010C	TIR2;SRP2	chrXV	346195	346950	-	HH	2729	60	756	54150	29913	84063	1	YES	TFIID	TATA-less	2	TAF1-enriched	-1.111111111	0.165148903	NA	NA	NA	NA	NA	NA	0.914896518	17	2.138	0.026125	4.912987613	0.13445431	0.074634855	NA	NA	NA	Lethal	NA	1.02725	NA	NA	7	189.4	Y	-149	16	0.005862953	4	1	173	150	24	176	-423	NA	NA	346195	0.54182	0.031609195	0.000115287	4.01E-05	0.000614342	8.76E-06	1	NA	0.104635762	79
YOR192C	THI72	chrXV	698768	700567	-	HT	3421	56	1800	48555	19494	68049	2	YES	SAGA/TFIID	NA	NA	NA	NA	NA	NA	NA	NA	NA	NA	NA	0.751865133	14	NA	NA	4.2291335	0.090666156	0.071198559	NA	NA	NA	Lethal	NA	1.01997	0.9896	51	2	113.6	Y	-1082	20	0.005846244	3	205	20	12	188	169	-95	NO	OPN	390724	0.31993	0.07183908	0.000314557	8.63E-05	0.000140997	4.30E-05	1	NA	0.043913285	79
YDR031W	MIC14	chrIV	503498	503863	+	HH	225	31	366	32487	20252	52739	0	NO	TFIID	NA	NA	NA	-5	0.015617261	NA	NA	NA	NA	NA	NA	0.120044283	17	1.58	0.124661	6.720202902	0.065702683	0.038142501	NA	NA	NA	Lethal	NA	1.01015	1.00981	11	23	88.3	N	-7	0	0	4	8	253	15	246	261	-67	YES	DPN	503498	0.68017	0.045977011	0.00017962	8.96E-05	0.000669321	0.00054074	2	NA	0.216438356	79
YDL222C	FMP45	chrIV	60872	61801	-	HT	443	38	930	42726	18398	61124	1	YES	SAGA	NA	NA	NA	-1.488888889	0.094862721	G+E	40.52592	0	6.994266	2.968444	0.008544331	0.747587912	14	NA	NA	6.842033481	0.657889913	0.118547232	NA	NA	NA	Lethal	NA	1.00866	1.00707	38	1	320.8	Y	NA	1	0.002257336	1	141	425	NA	NA	NA	NA	NA	NA	60872	3.1888	0.025862069	NA	NA	NA	0.001601182	1	NA	0.085037675	79
YOR190W	SPR1;SSG1	chrXV	690695	692032	+	HT	721	35	1338	41295	14824	56119	0	NO	TFIID	NA	NA	NA	-3.871428571	5.64E-05	NA	NA	NA	NA	NA	NA	0.1064575	5	NA	NA	4.317402005	0.086711736	0.068205038	NA	NA	NA	Lethal	NA	1.02274	NA	NA	2	99.9	Y	NA	3	0.004160888	4	26	141	NA	NA	252	-216	YES	UNCLEAR	399259	0.48207	0.014367816	NA	NA	NA	5.57E-05	2	NA	0.059087509	79
YDL186W	YDL186W;D1281	chrIV	125616	126449	+	HH	618	18	834	14487	4712	19199	0	NO	TFIID	NA	NA	NA	-1.705570292	0.023139576	NA	NA	NA	NA	NA	NA	1.068319587	16	NA	NA	2.935359113	0.08728361	0.10064799	NA	NA	NA	Lethal	NA	1.01666	1.00253	NA	NA	203.7	N	NA	3	0.004854369	4	14	232	NA	NA	246	-61	YES	DPN	125616	0.44703	0.060344828	0.000228767	9.43E-05	5.80E-05	0.000109707	3	NA	0.095438175	79.5
YDR343C	HXT6	chrIV	1159608	1161320	-	HT	1637	68	1713	56544	24568	81112	2	YES	SAGA	NA	NA	NA	NA	NA	G+E	40.52592	0	6.994266	2.968444	0.008544331	1.171278115	17	2.573	0.007531	5.814780696	1.979229003	0.241943903	3384.5	22.175	8.832	NA	NA	NA	NA	NA	NA	155.5	NA	NA	8	0.004886988	3	48	140	NA	NA	200	-215	NO	OPN	370613	2.4273	NA	NA	NA	NA	0.000271173	2	8	0.046436916	79.5
YKL071W	YKL071W	chrXI	305114	305884	+	HT	3232	44	771	45222	20275	65497	1	YES	SAGA/TFIID	NA	NA	NA	NA	NA	NA	NA	NA	NA	NA	NA	0.332137597	12	NA	NA	4.808147263	0.126175467	0.073877076	6838	12.295	-0.443	Lethal	NA	1.03475	1.01508	NA	5	212.4	N	NA	19	0.005878713	5	75	46	NA	NA	200	-428	NA	NA	305114	1.1648	0.011494253	NA	NA	NA	0.000179334	2	NA	0.103246753	79.5
YMR094W	CTF13;CBF3C	chrXIII	455825	457261	+	HT	269	33	1437	39444	19204	58648	0	NO	TFIID	TATA-less	1	TAF1-enriched	0.047454702	0.904102738	NA	NA	NA	NA	NA	NA	0.377571695	12	NA	NA	4.954357925	0.031152491	0.035625339	NA	NA	NA	Essential	Essential	0	NA	NA	1	114.2	N	-10	2	0.007434944	4	22	107	32	97	209	-310	UNCLEAR	UNCLEAR	455825	0.44111	0.022988506	0.000281943	6.36E-05	9.93E-05	0.001216413	3	NA	0.055710306	80
YIR018C-A	YIR018C-A	chrIX	385564	385701	-	HT	3871	10	138	9741	5929	15670	NA	NA	NA	NA	NA	NA	NA	NA	NA	NA	NA	NA	NA	NA	NA	NA	NA	NA	3.811352066	0.262068876	0.13431628	NA	NA	NA	Lethal	NA	NA	NA	NA	1	170.5	N	NA	15	0.003874968	5	83	69	NA	NA	161	-294	NO	OPN	54187	NA	NA	0.000117484	8.78E-05	0.00019679	NA	NA	NA	0.587591241	80.5
YLR205C	HMX1	chrXII	552724	553677	-	HH	901	45	954	65682	20865	86547	1	YES	TFIID	TATA-less	2	TAF1-enriched	-1.31372549	0.07245985	NA	NA	NA	NA	NA	NA	0.429557174	17	3.987	0.000439	8.38266692	0.034814306	0.022258539	NA	NA	NA	Lethal	NA	1.01388	0.97089	NA	7	240.3	N	-40	2	0.002219756	3	54	346	94	306	400	-21	YES	DPN	524500	0.82082	0.031609195	0.000527527	0.000121928	0.000120406	0.000174927	3	NA	0.084470094	80.5
YML027W	YOX1	chrXIII	221406	222563	+	HT	678	90	1158	102702	45445	148147	2	YES	TFIID	TATA-containing	0	TAF1-depleted	-2.5	0.001362462	NA	NA	NA	NA	NA	NA	0.094243428	17	1.775	0.070919	5.867598087	0.033320261	0.031109558	NA	NA	NA	Lethal	NA	1.00304	NA	NA	6	74	Y	-216	3	0.004424779	3	141	50	22	339	361	-269	YES	UNCLEAR	221406	0.32406	0.051724138	0.00112298	0.002176595	0.006334561	0.000952604	1	NA	0.069576491	80.5
YOR012W	YOR012W;OR26.02	chrXV	356543	356956	+	HT	685	13	414	17541	7146	24687	0	NO	TFIID	NA	NA	NA	-1.16	0.192646516	NA	NA	NA	NA	NA	NA	1.561969278	17	8.056	8.00E-06	5.102226571	0.235901853	0.095193202	NA	NA	NA	Lethal	NA	1.05099	0.99832	NA	7	388.4	N	-51	3	0.004379562	4	26	178	77	127	204	-49	NO	OPN	356543	0.31995	0.025862069	1.04E-05	1.13E-05	3.91E-06	5.17E-05	2	NA	0.196125908	81
YNR062C	YNR062C;N3527	chrXIV	744360	745343	-	HH	1600	34	984	30801	13135	43936	0	NO	TFIID	NA	NA	NA	NA	NA	NA	NA	NA	NA	NA	NA	NA	1	NA	NA	2.516463878	0.115196186	0.134874035	NA	NA	NA	Lethal	NA	1.01632	1.04889	NA	NA	216	N	367	9	0.005625	4	20	164	166	23	187	-397	NO	OPN	38990	0.19123	0.066091954	5.67E-05	0.000162372	5.52E-05	0.000306001	3	NA	0.082400814	81
YNR066C	YNR066C;N3543	chrXIV	753725	755035	-	HT	711	89	1311	105672	57332	163004	0	NO	SAGA	NA	NA	NA	NA	NA	NA	NA	NA	NA	NA	NA	1.120476613	13	NA	NA	4.878809923	0.155502733	0.08082675	NA	NA	NA	Lethal	NA	1.01024	1.03215	NA	NA	214.5	Y	53	3	0.004219409	4	65	204	12	257	269	-10	YES	DPN	29298	0.85114	0.094827586	0.000102155	0.000163923	0.00024354	0.000468715	3	NA	0.061832061	81
YKL163W	PIR3;CCW8	chrXI	144401	145378	+	HH	1582	78	978	89724	38788	128512	2	YES	SAGA	NA	NA	NA	NA	NA	G+E	40.52592	0	6.994266	2.968444	0.008544331	1.073114266	14	NA	NA	4.684681676	0.375124762	0.130739789	NA	NA	NA	Lethal	NA	1.01115	NA	NA	19	82.3	Y	NA	6	0.003792668	3	136	55	NA	NA	219	-130	UNCLEAR	UNCLEAR	144401	1.2069	0.054597701	0.000120995	0.000356977	0.003045029	NA	1	NA	0.082906858	81
YNR040W	YNR040W;N3407	chrXIV	699690	700460	+	HH	259	19	771	15006	4740	19746	3	YES	NA	TATA-less	2	TAF1-enriched	-1.85	0.012258765	NA	NA	NA	NA	NA	NA	0.09020433	17	0.808	0.673669	6.610468053	0.025566589	0.024188235	NA	NA	NA	Lethal	NA	1.00393	1.02851	20	19	199.9	N	0	1	0.003861004	4	35	252	35	252	287	-40	YES	DPN	83873	0.44384	0.063218391	1.46E-05	1.83E-05	5.99E-05	0.000222591	3	NA	0.105844156	81.5
YBL074C	AAR2	chrII	86722	87789	-	HT	734	21	1068	36564	11582	48146	0	NO	TFIID	TATA-less	2	TAF1-enriched	0.35942029	0.255738627	G+E	40.52592	0	6.994266	2.968444	0.008544331	0.126579197	15	NA	NA	5.447107967	0.025380077	0.029246943	NA	NA	NA	Essential	Essential	0	NA	NA	3	212.5	N	-14	2	0.002724796	2	23	516	37	502	539	-52	YES	DPN	86722	0.23017	0.020114943	6.15E-05	3.26E-05	0.000101748	1.90E-05	3	NA	0.076382381	81.5
YOR258W	HNT3	chrXV	811671	812324	+	HT	178	31	654	28272	12169	40441	1	YES	TFIID	NA	NA	NA	-5.594117647	0.000141985	NA	NA	NA	NA	NA	NA	0.041919538	17	0.796	0.686324	5.603544889	0.019502751	0.024922126	NA	NA	NA	Lethal	NA	1.04202	0.97991	NA	28	156.2	N	-8	1	0.005617978	4	48	138	56	130	186	-27	NO	OPN	278967	0.19841	0.063218391	4.09E-05	4.94E-05	1.65E-05	0.000153406	2	NA	0.124808576	81.5
YNL331C	AAD14	chrXIV	16118	17248	-	HT	753	26	1131	35235	12176	47411	0	NO	TFIID	NA	NA	NA	NA	NA	NA	NA	NA	NA	NA	NA	1.01081147	17	13.006	0	5.236980124	0.06722802	0.049510149	NA	NA	NA	Lethal	NA	0	NA	NA	3	143.6	Y	NA	4	0.005312085	4	70	119	NA	NA	212	-194	UNCLEAR	UNCLEAR	16118	0.83529	0.166666667	2.94E-05	0.000166603	1.47E-05	9.69E-05	3	NA	0.072123894	81.5
YLR132C	USB1	chrXII	407283	408155	-	HH	290	23	873	22704	7086	29790	0	NO	TFIID	NA	NA	NA	-0.25170068	0.542015769	NA	NA	NA	NA	NA	NA	0.239599683	14	NA	NA	5.790097147	0.026352284	0.028036467	NA	NA	NA	Essential	Essential	0	1.0439	NA	21	233.4	N	-85	2	0.006896552	3	163	10	75	181	256	-85	YES	DPN	407283	0.52151	0.068965517	0.000241052	0.000283812	0.000355821	5.64E-05	3	NA	0.093463303	81.5
YIL164C	NIT1	chrIX	34087	34686	-	HH	2699	32	600	29490	14958	44448	1	YES	SAGA/TFIID	TATA-less	2	TAF1-enriched	NA	NA	NA	NA	NA	NA	NA	NA	1.317636859	13	NA	NA	7.518007709	0.367310191	0.080614603	NA	NA	NA	Lethal	NA	1.01766	NA	NA	NA	206.1	N	-289	15	0.005557614	3	200	98	18	237	255	-346	YES	UNCLEAR	34087	0.20914	0.103448276	NA	NA	NA	0.000186845	2	NA	0.1360601	81.5
YGL018C	JAC1;SEO2	chrVII	459110	459664	-	HH	190	9	555	12048	2133	14181	0	NO	TFIID	NA	NA	NA	-1.4	0.162940568	G+E	40.52592	0	6.994266	2.968444	0.008544331	0.03172086	17	1.364	0.209194	6.439984437	0.036240823	0.029560666	NA	NA	NA	Essential	Essential	0	NA	NA	41	119.2	N	-35	1	0.005263158	4	177	16	19	181	200	-91	NO	OPN	459110	0.28789	0.014367816	4.83E-06	3.40E-06	1.28E-05	8.29E-05	3	NA	0.14801444	82
YHR189W	PTH1	chrVIII	484028	484600	+	HH	191	31	573	37458	12828	50286	0	NO	TFIID	NA	NA	NA	-1.529411765	0.128069967	NA	NA	NA	NA	NA	NA	1.738587663	11	NA	NA	5.208729954	0.042793813	0.039715373	NA	NA	NA	Lethal	NA	1.05823	1.0221	296	NA	198	N	NA	1	0.005235602	4	224	3	NA	NA	217	-78	UNCLEAR	UNCLEAR	78043	0.3916	0.083333333	2.48E-05	4.23E-05	8.31E-05	1.43E-05	3	NA	0.143356643	82
YGR188C	BUB1	chrVII	872044	875109	-	HT	1560	24	3066	26706	9611	36317	0	NO	TFIID	TATA-less	1	TAF1-enriched	-1.238928376	0.002409625	NA	NA	NA	NA	NA	NA	0.069733674	17	2.108	0.027625	5.167044936	0.01380497	0.022739216	NA	NA	NA	Lethal	NA	0	NA	56	2	100.4	Y	-53	8	0.005128205	3	152	16	37	224	261	-91	YES	DPN	215831	0.3556	0.051724138	1.39E-05	1.36E-05	4.11E-05	1.16E-05	3	NA	0.026916803	82.5
YBR050C	REG2	chrII	337183	338199	-	HT	521	45	1017	59115	20801	79916	1	YES	NA	NA	NA	NA	-0.949019608	0.05637032	NA	NA	NA	NA	NA	NA	0.036793058	14	NA	NA	6.277701159	0.033469092	0.029142132	NA	NA	NA	Lethal	NA	0.99165	NA	NA	24	222.2	N	-177	2	0.003838772	3	204	21	156	11	359	-263	YES	UNCLEAR	337183	2.0131	0.060344828	NA	NA	NA	1.07E-05	2	NA	0.081200787	82.5
YJL105W	SET4	chrX	225055	226737	+	HT	1728	25	1683	22716	12140	34856	1	YES	TFIID	NA	NA	NA	-1.994318182	0.001135777	NA	NA	NA	NA	NA	NA	0.0722	2	NA	NA	3.934057912	0.129212362	0.091371611	NA	NA	NA	Lethal	NA	1.01841	0.96288	13	NA	306.8	Y	-1322	7	0.004050926	4	32	141	34	80	181	-391	NO	OPN	225055	0.41587	0.043103448	0.000105017	3.81E-05	5.75E-05	5.58E-05	2	NA	0.049346017	83
YGR030C	POP6	chrVII	545681	546157	-	HH	284	38	477	43632	15614	59246	0	NO	TFIID	TATA-less	2	TAF1-enriched	-0.193548387	0.901931643	NA	NA	NA	NA	NA	NA	0.081742747	17	0.666	0.813299	6.387464417	0.035044992	0.029307886	98	21.35	-2.35	Essential	Essential	0	NA	NA	16	124.5	N	-15	2	0.007042254	4	32	117	47	102	149	-43	NO	OPN	544783	0.66418	0.028735632	4.84E-05	4.44E-05	2.11E-05	6.74E-05	1	NA	0.174369748	83
YER128W	VFA1	chrV	415859	416470	+	HT	305	23	612	32196	12097	44293	0	NO	TFIID	NA	NA	NA	-1	0.166211651	NA	NA	NA	NA	NA	NA	0.016478635	17	0.526	0.921773	6.06964173	0.046102732	0.035375312	233	19.945	0.686	Lethal	NA	1.02123	0.97624	NA	34	203.3	N	-62	2	0.006557377	4	158	6	56	126	198	-263	NO	OPN	160404	0.16354	0.022988506	0.000177962	4.95E-05	2.09E-05	8.15E-06	2	NA	0.135842881	83
YIL166C	YIL166C	chrIX	30938	32566	-	HT	1152	25	1629	23220	10440	33660	0	NO	TFIID	NA	NA	NA	NA	1	NA	NA	NA	NA	NA	NA	0.601168402	10	NA	NA	5.094213365	0.066380209	0.050575732	NA	NA	NA	Lethal	NA	1.02617	0.98374	NA	1	150.4	Y	NA	6	0.005208333	4	63	47	NA	NA	160	-122	NO	OPN	30938	0.6205	0.08045977	0.000256963	0.000126907	0.00035058	0.000150381	2	NA	0.051289926	83.5
YNL279W	PRM1	chrXIV	110917	112902	+	HH	506	75	1986	81243	40892	122135	1	YES	SAGA	NA	NA	NA	-0.595454545	0.107722591	NA	NA	NA	NA	NA	NA	1.571245601	15	NA	NA	3.615861076	0.161141541	0.111017647	NA	NA	NA	Lethal	NA	1.03138	NA	NA	NA	157	N	NA	3	0.005928854	4	125	66	NA	NA	212	-276	UNCLEAR	UNCLEAR	110917	0.31374	0.103448276	0.00037896	0.000160513	0.000312953	0.000131266	1	NA	0.042065491	83.5
YIL165C	YIL165C;YI9402.10AC	chrIX	33718	34077	-	HT	10	29	360	20388	9783	30171	0	NO	TFIID	NA	NA	NA	NA	0.038790848	NA	NA	NA	NA	NA	NA	1.027136801	17	14.038	0	8.078340854	0.387125448	0.077020031	NA	NA	NA	Lethal	NA	1.03155	0.99474	NA	5	206.5	N	NA	0	0	4	23	90	NA	NA	160	-165	NO	OPN	33718	0.28244	0.120689655	NA	NA	NA	NA	1	NA	0.232590529	83.5
YPR167C	MET16	chrXVI	876847	877632	-	HH	444	38	786	35160	10762	45922	1	YES	TFIID	TATA-containing	0	TAF1-depleted	-2.529411765	0.03816888	NA	NA	NA	NA	NA	NA	1.635970882	17	34.685	0	8.466034752	0.015251789	0.014587483	NA	NA	NA	Lethal	NA	1.01462	NA	39	18	278.5	N	-83	2	0.004504505	3	111	62	21	183	204	-137	NO	OPN	70434	1.192	0.00862069	NA	NA	NA	7.25E-05	2	NA	0.106369427	83.5
YGR240C-A	YGR240C-A	chrVII	974577	974777	-	HT	98	4	201	456	216	672	NA	NA	NA	TATA-less	2	TAF1-depleted	NA	NA	NA	NA	NA	NA	NA	NA	NA	NA	NA	NA	3.762074772	0.255193356	0.13427874	NA	NA	NA	NA	NA	NA	NA	NA	NA	129.4	NA	NA	1	0.010204082	3	136	67	NA	NA	311	-142	YES	DPN	116163	NA	NA	7.62E-05	3.77E-06	1.80E-05	NA	NA	NA	0.42	84
YDR123C	INO2;DIE1;SCS1	chrIV	698554	699468	-	HH	847	41	915	33756	14852	48608	0	NO	TFIID	TATA-less	2	TAF1-enriched	-0.478537361	0.342215993	NA	NA	NA	NA	NA	NA	0.095979251	17	1.177	0.333025	6.529013484	0.035333552	0.028790293	NA	NA	NA	Lethal	NA	1.00558	NA	230	28	117.8	N	-70	5	0.005903188	3	158	28	42	85	246	-230	YES	UNCLEAR	698554	0.19211	0.08045977	6.45E-05	4.92E-05	3.61E-05	9.44E-06	1	NA	0.09190372	84
YBL025W	RRN10	chrII	171481	171918	+	HT	443	7	438	10218	4291	14509	0	NO	TFIID	TATA-less	1	TAF1-enriched	-0.8125	0.385298717	NA	NA	NA	NA	NA	NA	0.110331592	17	1.832	0.076504	6.220838441	0.045123692	0.034147066	NA	NA	NA	Lethal	NA	0	NA	NA	16	169.5	N	-68	3	0.006772009	4	158	7	61	188	249	-82	YES	DPN	171481	0.17142	0.020114943	0.001559401	0.001147817	0.002608052	5.50E-05	2	NA	0.19221968	84
YBR117C	TKL2	chrII	474392	476437	-	HH	1234	53	2046	52800	19756	72556	1	YES	SAGA	NA	NA	NA	-3.725	0.003226595	G+E	40.52592	0	6.994266	2.968444	0.008544331	2.81384375	9	NA	NA	5.641160742	1.218236882	0.195657904	NA	NA	NA	Lethal	NA	0	NA	NA	NA	267.6	Y	-237	5	0.004051864	2	122	22	50	376	165	-97	NO	OPN	336747	2.0676	0.031609195	NA	NA	NA	0.000305876	2	NA	0.041075795	84
YGR110W	CLD1	chrVII	713709	715046	+	HH	7208	41	1338	48687	16950	65637	0	NO	TFIID	NA	NA	NA	-2.76031746	0.000316329	G+E	40.52592	0	6.994266	2.968444	0.008544331	0.424231001	17	2.119	0.033168	5.934304402	0.026691579	0.027530704	NA	NA	NA	Lethal	NA	1.06146	1.01405	NA	33	125.5	N	NA	42	0.005826859	3	159	4	NA	NA	276	-79	YES	DPN	375894	1.4234	0.00862069	0.000255053	9.71E-05	4.38E-05	0.000654622	3	NA	0.063201197	84.5
YBR186W	PCH2	chrII	600553	602360	+	HH	594	22	1695	17361	7193	24554	0	NO	NA	NA	NA	NA	-0.172413793	0.566614093	NA	NA	NA	NA	NA	NA	0.928466667	4	NA	NA	2.737171219	0.040772382	0.07377022	NA	NA	NA	Lethal	NA	1.00981	NA	NA	NA	211.1	N	NA	3	0.005050505	3	198	19	NA	NA	203	-263	NO	OPN	210824	0.55821	0.091954023	0.000643045	0.000670388	0.000818914	0.000895355	3	NA	0.04676259	84.5
YLR361C-A	YLR361C-A	chrXII	849383	849679	-	HH	187	1	297	0	0	0	NA	NA	NA	NA	NA	NA	-0.333333333	0.745374724	NA	NA	NA	NA	NA	NA	NA	NA	NA	NA	6.711578492	0.02235634	0.022277973	NA	NA	NA	Lethal	NA	NA	NA	NA	47	293.1	N	-23	0	0	4	5	200	28	177	205	-70	NO	OPN	228498	NA	NA	3.35E-05	1.13E-05	6.69E-06	NA	NA	NA	0.287162162	85
YPL047W	SGF11	chrXVI	465962	466261	+	HT	314	17	300	22812	9933	32745	0	NO	TFIID	TATA-less	1	TAF1-enriched	-29	0.00141678	G+E	40.52592	0	6.994266	2.968444	0.008544331	0.051668109	17	1.549	0.131646	6.99730467	0.0299422	0.024729257	71.5	24.46	-1.574	Lethal	NA	0.96933	1.01399	158	53	288	N	-78	1	0.003184713	3	93	80	171	2	288	-155	YES	UNCLEAR	465962	0.22822	0.060344828	4.78E-05	4.17E-05	7.87E-05	4.89E-05	1	NA	0.284280936	85
YCR007C	YCR007C;YCR045;YCR7C	chrIII	126011	126730	-	HH	1740	29	720	31956	11989	43945	0	NO	TFIID	TATA-less	2	TAF1-enriched	NA	NA	NA	NA	NA	NA	NA	NA	0.243038714	15	NA	NA	5.600181809	0.057612142	0.042860268	NA	NA	NA	Lethal	NA	1.01634	1.00623	NA	16	154.7	Y	NA	7	0.004022989	4	19	90	NA	NA	184	-326	NO	OPN	126011	0.64147	0.017241379	7.94E-05	4.93E-05	0.000115049	1.29E-05	2	NA	0.11821975	85
YHL016C	DUR3	chrVIII	72037	74244	-	HH	455	54	2208	58437	19351	77788	1	YES	SAGA	TATA-containing	0	TAF1-enriched	-2.455974843	0.003688079	NA	NA	NA	NA	NA	NA	0.540493482	17	4.244	0.000123	5.739560393	0.25438506	0.087875371	NA	NA	NA	Lethal	NA	1.01643	NA	NA	8	198.8	N	NA	2	0.004395604	4	96	64	NA	NA	242	-311	YES	UNCLEAR	72037	1.2325	0.011494253	0.001075175	0.000138029	7.98E-05	3.42E-05	2	NA	0.03851382	85
YER139C	RTR1	chrV	450563	451243	-	HH	322	20	681	29172	8426	37598	0	NO	TFIID	NA	NA	NA	-3	0.031134286	NA	NA	NA	NA	NA	NA	0.257118291	17	4.251	8.70E-05	6.58665143	0.011720109	0.01643619	NA	NA	NA	Lethal	NA	0.9087	1.00197	NA	26	128.4	Y	-103	2	0.00621118	3	107	55	48	209	257	-130	YES	DPN	125631	0.3943	0.005747126	NA	NA	NA	0.000812658	3	NA	0.125	85
YIL134W	FLX1	chrIX	97395	98330	+	HH	670	22	936	17241	7027	24268	0	NO	TFIID	TATA-less	1	TAF1-enriched	-0.233333333	0.664570881	G+E	40.52592	0	6.994266	2.968444	0.008544331	0.108781059	17	0.767	0.716296	5.73640351	0.030954009	0.030670352	NA	NA	NA	Lethal	NA	1.02838	NA	198	14	203	Y	174	4	0.005970149	4	170	50	171	4	294	-346	YES	UNCLEAR	97395	0.25517	0.100574713	6.18E-05	1.96E-06	1.97E-05	NA	1	NA	0.09144385	85.5
YGR133W	PEX4;PAS2;UBC10	chrVII	756896	757447	+	HH	444	18	552	21831	10243	32074	0	NO	TFIID	TATA-less	1	TAF1-enriched	-0.015384615	0.978354277	NA	NA	NA	NA	NA	NA	0.054135313	17	1.77	0.070701	5.981881308	0.021142317	0.0243074	NA	NA	NA	Lethal	NA	0.98546	NA	97	NA	209.5	N	30	2	0.004504505	4	77	169	47	199	269	-244	YES	UNCLEAR	333493	0.22626	0.097701149	0.000132914	1.40E-05	8.91E-05	0.000320341	3	NA	0.155172414	85.5
YLR234W	TOP3;EDR1	chrXII	609783	611753	+	HH	259	39	1971	46956	25316	72272	0	NO	TFIID	TATA-less	1	TAF1-enriched	-0.752380952	0.169336943	G+E	40.52592	0	6.994266	2.968444	0.008544331	0.136579827	15	NA	NA	4.727640332	0.049547396	0.047083202	NA	NA	NA	Lethal	NA	0	NA	NA	9	229.9	N	-64	1	0.003861004	5	4	155	68	91	159	-71	NO	OPN	466424	0.32154	0.137931034	5.85E-05	2.97E-05	0.000236308	6.00E-06	1	NA	0.043401015	85.5
YEL064C	AVT2	chrV	29797	31239	-	HT	455	15	1443	13473	4024	17497	0	NO	TFIID	NA	NA	NA	-1.690972222	0.002664021	NA	NA	NA	NA	NA	NA	0.281057937	16	NA	NA	6.186566042	0.01897099	0.022263598	NA	NA	NA	Lethal	NA	1.02593	0.9824	NA	30	115.7	Y	-45	3	0.006593407	4	11	144	56	99	197	-327	NO	OPN	29797	0.42133	0.051724138	7.09E-05	4.01E-05	4.10E-05	0.000741328	2	NA	0.059292649	85.5
YKR083C	DAD2;HSK1	chrXI	596421	596822	-	HT	233	15	402	16524	6997	23521	0	NO	TFIID	NA	NA	NA	-4.25	0.024263179	NA	NA	NA	NA	NA	NA	0.13384657	17	3.025	0.003252	6.438465155	0.012424257	0.017312224	138	NA	NA	Essential	Essential	0	1.0187	NA	32	327.2	N	-68	2	0.008583691	5	79	62	6	153	197	-296	NO	OPN	69994	0.48894	0.074712644	9.49E-05	4.25E-05	0.000265983	3.28E-05	3	NA	0.213216958	85.5
YDR501W	PLM2	chrIV	1451353	1452918	+	HH	500	23	1566	23541	7871	31412	0	NO	TFIID	NA	NA	NA	0.226284585	0.352642298	NA	NA	NA	NA	NA	NA	0.129609025	17	1.285	0.267626	5.203493383	0.065285078	0.049103445	NA	NA	NA	Lethal	NA	1.00451	NA	NA	6	105.7	Y	-24	2	0.004	4	66	82	90	58	251	-157	YES	UNCLEAR	79015	0.23461	0	0.000438168	0.000681128	0.001920582	0.000167858	3	NA	0.054632588	85.5
YOL159C	YOL159C	chrXV	17281	17796	-	HT	1695	49	516	58113	21771	79884	0	NO	TFIID	NA	NA	NA	NA	NA	G+E	40.52592	0	6.994266	2.968444	0.008544331	2.05356028	17	12.873	0	6.090511014	0.582328869	0.125294044	NA	NA	NA	Lethal	NA	1.02015	1.0211	NA	31	191.4	N	-32	11	0.006489676	4	165	4	28	101	187	-354	NO	OPN	17281	0.36473	0.189655172	NA	NA	NA	0.00052305	3	NA	0.166019417	85.5
YPL108W	YPL108W	chrXVI	348446	348952	+	HH	1057	24	507	16866	8299	25165	0	NO	TFIID	NA	NA	NA	-0.444816054	0.444826898	G+E	40.52592	0	6.994266	2.968444	0.008544331	0.039596607	17	0.717	0.76684	5.769110055	0.051928176	0.039499601	NA	NA	NA	Lethal	NA	1.02469	1.00197	NA	NA	229.1	N	11	7	0.006622517	4	59	188	48	199	247	-16	YES	DPN	348446	0.40056	0.068965517	6.15E-05	4.86E-06	1.41E-05	9.58E-05	3	NA	0.169960474	86
YGR126W	YGR126W;G6365	chrVII	745835	746527	+	HT	400	18	693	16920	6635	23555	0	NO	TFIID	NA	NA	NA	-0.566666667	0.516598421	G+E	40.52592	0	6.994266	2.968444	0.008544331	0.344441331	16	NA	NA	5.057246228	0.069903908	0.052280126	NA	NA	NA	Lethal	NA	1.00426	1.0031	NA	1	200.9	N	-113	2	0.005	3	198	155	311	42	186	-230	NO	OPN	344413	0.2349	0.031609195	6.55E-05	3.88E-05	3.54E-05	2.27E-05	3	NA	0.124277457	86
YPL018W	CTF19;MCM18	chrXVI	517651	518760	+	HH	633	58	1110	66273	25144	91417	0	NO	TFIID	TATA-containing	0	TAF1-enriched	-1.84375	0.009525477	NA	NA	NA	NA	NA	NA	3.190760256	13	NA	NA	7.493381371	0.026538791	0.02174016	NA	NA	NA	Lethal	NA	0.89984	NA	19	17	189.9	N	-27	2	0.003159558	3	0	0	27	119	380	-221	YES	UNCLEAR	429306	0.54284	0.07183908	0.000152177	9.44E-05	0.000112795	0.004522463	1	NA	0.07754734	86
YMR206W	YMR206W;YM8325.07	chrXIII	675896	676837	+	HH	1130	39	942	34473	17389	51862	3	YES	NA	NA	NA	NA	-0.828877005	0.130731478	NA	NA	NA	NA	NA	NA	0.048559408	17	1.075	0.413266	3.909353613	0.15092446	0.099374478	NA	NA	NA	Lethal	NA	1.03312	0.99283	NA	19	100.8	N	-385	2	0.001769912	3	35	168	217	171	388	-243	YES	UNCLEAR	247594	2.3932	0.094827586	0.000126177	0.000174868	6.13E-05	0.000338056	1	NA	0.091392136	86
YPL192C	PRM3	chrXVI	182655	183056	-	HT	541	22	402	26097	13983	40080	0	NO	TFIID	NA	NA	NA	0.1	0.853511423	G+E	40.52592	0	6.994266	2.968444	0.008544331	2.017816667	6	NA	NA	4.265049009	0.580914704	0.17870313	NA	NA	NA	Lethal	NA	1.00465	NA	37	1	167.9	N	-223	3	0.005545287	4	190	17	40	224	264	-258	YES	UNCLEAR	182655	0.16466	0.054597701	NA	NA	NA	8.12E-05	3	NA	0.21446384	86
YBR268W	MRPL37	chrII	741299	741616	+	HT	277	35	318	40398	13919	54317	0	NO	TFIID	TATA-less	1	TAF1-enriched	-5	0.011305798	NA	NA	NA	NA	NA	NA	0.060577168	17	1.226	0.289157	7.437172784	0.045986329	0.028834107	108	28.715	5.596	Lethal	NA	0.66277	NA	NA	59	163.5	N	-14	1	0.003610108	4	36	227	50	213	263	-39	YES	DPN	71568	0.31256	0.068965517	NA	NA	NA	0.000199333	1	NA	0.272870662	86.5
YKL162C	YKL162C;YKL616	chrXI	147630	148838	-	HT	548	25	1209	21837	9054	30891	0	NO	TFIID	TATA-less	1	TAF1-enriched	-0.8225	0.121327471	NA	NA	NA	NA	NA	NA	0.722941244	15	NA	NA	5.439626772	0.034065751	0.033930471	NA	NA	NA	Lethal	NA	1.00562	1.00224	NA	8	121	N	-84	3	0.005474453	4	97	63	21	226	247	-138	YES	DPN	147630	0.63409	0.020114943	NA	NA	NA	NA	3	NA	0.07160596	86.5
YBR128C	ATG14;APG14;CVT12	chrII	493081	494115	-	HT	238	14	1035	21444	13565	35009	0	NO	NA	NA	NA	NA	-2.743589744	0.00180553	NA	NA	NA	NA	NA	NA	0.376629544	12	NA	NA	5.455283766	0.041430295	0.037311411	NA	NA	NA	Lethal	NA	0.98454	NA	80	1	204.4	N	-32	1	0.004201681	4	42	213	74	181	255	-33	YES	DPN	319069	0.38305	0.120689655	NA	NA	NA	8.97E-05	1	NA	0.084139265	87
YDR424C	DYN2;SLC1	chrIV	1319387	1319841	-	HH	223	41	279	39081	13849	52930	0	NO	TFIID	TATA-less	1	TAF1-enriched	1	0.237468913	NA	NA	NA	NA	NA	NA	0.057801372	17	1.772	0.06804	7.041451056	0.024373513	0.022171593	NA	NA	NA	Lethal	NA	1.01261	NA	NA	30	115	N	-26	1	0.004484305	4	33	206	59	180	239	-42	YES	DPN	212092	0.29891	0.002873563	NA	NA	NA	0.000117875	2	NA	0.191629956	87
YMR252C	YMR252C;YM9920.06C	chrXIII	775315	775719	-	HT	227	31	405	33795	18782	52577	0	NO	TFIID	NA	NA	NA	-3.714285714	0.012259912	NA	NA	NA	NA	NA	NA	0.218566129	17	3.817	0.000507	7.28505181	0.03643523	0.026201618	NA	NA	NA	Lethal	NA	1.01226	0.9842	NA	8	241.9	N	-63	2	0.008810573	4	140	14	49	98	147	-89	NO	OPN	148712	0.39701	0.086206897	NA	NA	NA	0.000878536	1	NA	0.215346535	87
YPL144W	POC4;DMP1	chrXVI	280480	280926	+	HH	781	50	447	53898	18235	72133	0	NO	TFIID	TATA-less	1	TAF1-enriched	-0.753246753	0.364212514	NA	NA	NA	NA	NA	NA	0.059889189	17	1.121	0.370275	6.905925577	0.020212325	0.020586676	104	21.6	-1.462	Lethal	NA	0.98523	0.98162	8	47	257.4	N	-26	3	0.003841229	2	163	12	14	486	500	-87	YES	DPN	280480	0.38475	0.08908046	8.54E-05	1.91E-05	3.04E-05	0.000247368	1	NA	0.196188341	87.5
YML011C	RAD33	chrXIII	246895	247428	-	HH	249	14	534	19776	5160	24936	0	NO	TFIID	TATA-containing	0	TAF1-enriched	-5.6	0.001810427	NA	NA	NA	NA	NA	NA	0.047540936	17	0.913	0.564872	6.258617945	0.012994654	0.018213941	NA	NA	NA	Lethal	NA	0.9856	0.97308	NA	15	130.4	N	-36	0	0	3	11	266	47	230	277	-64	YES	DPN	246895	0.18157	0.017241379	2.75E-05	2.95E-05	7.48E-05	0.000554132	3	NA	0.164165103	87.5
YLL009C	COX17	chrXII	131205	131414	-	HH	315	61	210	60804	28905	89709	3	YES	TFIID	TATA-less	1	TAF1-enriched	-1.166666667	0.478805381	NA	NA	NA	NA	NA	NA	0.270187718	17	1.679	0.091945	8.196751841	0.049558963	0.027159347	1195	12.585	-2.16	Lethal	NA	0.96817	NA	10	47	373.3	N	-52	3	0.00952381	4	129	18	34	92	163	-381	NO	OPN	131205	0.539	0.175287356	1.93E-05	3.06E-05	7.61E-05	0.000147346	3	1	0.418660287	87.5
YDL057W	YDL057W	chrIV	351434	352420	+	HT	397	23	987	33876	17487	51363	0	NO	TFIID	TATA-less	1	TAF1-enriched	-0.75177305	0.097189354	G+E	40.52592	0	6.994266	2.968444	0.008544331	0.111347445	17	0.872	0.607129	5.58188828	0.045516178	0.038220974	NA	NA	NA	Lethal	NA	1.03882	0.98702	NA	5	130.7	N	-47	2	0.005037783	5	34	112	81	65	192	-294	NO	OPN	351434	0.25682	0.025862069	6.58E-05	5.19E-05	2.98E-05	0.000271222	3	NA	0.088742394	87.5
YML042W	CAT2;CAT;YCAT	chrXIII	192788	194800	+	HH	1021	45	2013	47412	21183	68595	0	NO	TFIID	NA	NA	NA	-1.284729586	0.004993177	G+E	40.52592	0	6.994266	2.968444	0.008544331	0.070083869	17	1.658	0.10691	4.958650351	0.091410305	0.060972513	NA	NA	NA	Lethal	NA	1.00851	NA	NA	NA	181.1	Y	NA	6	0.005876592	3	163	36	NA	NA	275	-231	YES	UNCLEAR	192788	2.8542	0.045977011	0.001566593	8.95E-05	0.000371628	0.000232002	1	NA	0.043489066	87.5
YMR138W	CIN4;GTP1;UGX1	chrXIII	545155	545730	+	HH	192	35	576	30954	12614	43568	0	NO	TFIID	NA	NA	NA	-0.162055336	0.792027958	NA	NA	NA	NA	NA	NA	0.089465379	17	2.258	0.021559	5.882875189	0.035730927	0.032131612	NA	NA	NA	Lethal	NA	0.96323	NA	58	63	118.3	N	0	1	0.005208333	4	20	161	20	161	185	-55	NO	OPN	378701	0.27911	0.117816092	NA	NA	NA	0.000498491	3	NA	0.153043478	88
YPR182W	SMX3	chrXVI	900194	900454	+	HH	527	21	261	18786	6377	25163	0	NO	TFIID	TATA-less	1	TAF1-enriched	-1.428571429	0.554455675	NA	NA	NA	NA	NA	NA	0.053903205	17	0.427	0.968793	6.732367319	0.045853057	0.031806534	198	19.065	-0.813	Essential	Essential	1.04517	NA	NA	24	140.6	N	-62	2	0.003795066	3	282	32	30	156	312	-293	YES	UNCLEAR	47612	0.1992	0.017241379	2.35E-05	4.51E-06	2.83E-05	4.23E-05	1	NA	0.340384615	88.5
YDR511W	ACN9	chrIV	1470017	1470418	+	HT	312	16	402	13932	8311	22243	0	NO	TFIID	TATA-less	1	TAF1-enriched	-2.381818182	0.025766212	G+E	40.52592	0	6.994266	2.968444	0.008544331	0.105688201	17	1.744	0.074827	7.730395564	0.057244754	0.03095039	NA	NA	NA	Lethal	NA	0.972	0.99857	72	33	110.8	N	15	1	0.003205128	4	26	214	11	229	240	-49	YES	DPN	61515	0.38951	0.031609195	3.47E-05	2.43E-05	2.74E-05	0.00022432	1	NA	0.220698254	88.5
YIL029C	YIL029C	chrIX	300829	301257	-	HT	2422	15	429	14031	6727	20758	0	NO	TFIID	TATA-less	1	TAF1-enriched	NA	NA	NA	NA	NA	NA	NA	NA	1.850291041	12	NA	NA	4.312040293	0.725115143	0.19747889	NA	NA	NA	Lethal	NA	1.06834	0.98723	NA	9	143.6	Y	-105	13	0.005367465	3	110	42	63	260	323	-117	YES	DPN	138631	0.29415	0.017241379	0.000125838	7.18E-05	0.000418724	7.40E-05	2	NA	0.206775701	88.5
YBR233W-A	DAD3	chrII	684977	685261	+	HT	308	6	285	6321	3165	9486	0	NO	NA	TATA-less	1	TAF1-enriched	0.32	0.743006934	NA	NA	NA	NA	NA	NA	1.456691894	17	3.691	0.002196	6.973075554	0.005614802	0.010745902	111.5	NA	NA	Essential	Essential	NA	NA	NA	60	187.2	N	-19	1	0.003246753	4	0	0	19	215	234	-75	YES	DPN	127923	NA	NA	0.00019008	0.000112629	0.000195453	0.006303728	NA	NA	0.311619718	88.5
YCR107W	AAD3	chrIII	313890	314981	+	HT	434	60	1092	68490	22221	90711	0	NO	TFIID	NA	NA	NA	NA	NA	G+E	40.52592	0	6.994266	2.968444	0.008544331	4.118231264	17	8.889	1.00E-06	5.840296061	0.42948624	0.112212119	NA	NA	NA	Lethal	NA	1.01704	NA	20	3	271.9	Y	NA	2	0.004608295	4	87	140	NA	NA	227	12	YES	DPN	1639	0.49776	0.034482759	NA	NA	NA	0.002236947	3	NA	0.08111824	88.5
YNR004W	SWM2	chrXIV	635943	636383	+	HH	646	21	441	24792	8587	33379	0	NO	TFIID	NA	NA	NA	-2.431372549	0.034511241	NA	NA	NA	NA	NA	NA	0.127588698	17	2.053	0.033942	5.05695721	0.056304459	0.046922605	NA	NA	NA	Lethal	NA	0.86959	1.02093	NA	26	149.6	N	-26	2	0.003095975	3	35	226	61	200	261	-40	YES	DPN	147950	0.14099	0.040229885	NA	NA	NA	1.74E-05	2	NA	0.201136364	88.5
YKR039W	GAP1	chrXI	515063	516871	+	HH	1904	54	1809	48954	21428	70382	0	NO	TFIID	TATA-less	1	TAF1-depleted	-7.34841629	4.10E-11	G+E	40.52592	0	6.994266	2.968444	0.008544331	0.665574979	16	NA	NA	9.399447862	0.066532648	0.027441956	NA	NA	NA	Lethal	NA	1.02071	NA	NA	14	113.8	Y	-72	10	0.005252101	4	16	169	88	97	185	-59	NO	OPN	149945	2.6853	0.045977011	0.000573735	0.000121637	0.000330628	3.62E-05	1	NA	0.049225664	89
YOL141W	PPM2;TYW4	chrXV	56452	58539	+	HT	172	27	2088	31308	10605	41913	0	NO	TFIID	TATA-containing	0	TAF1-enriched	-1.619984264	0.000539212	NA	NA	NA	NA	NA	NA	0.262209539	15	NA	NA	5.040367836	0.042503129	0.040902346	59	24.05	-3.024	Lethal	NA	1.00975	NA	NA	2	152.8	N	-16	0	0	4	22	217	38	201	239	-53	YES	DPN	56452	0.59941	0.017241379	NA	NA	NA	7.80E-05	3	NA	0.042644945	89
YGL127C	SOH1;MED31	chrVII	270392	270775	-	HH	222	26	384	30066	10704	40770	0	NO	TFIID	TATA-less	2	TAF1-enriched	-2	0.239133341	NA	NA	NA	NA	NA	NA	0.080893145	17	0.966	0.511101	6.403922128	0.023803861	0.024092267	106.5	21.475	-1.759	Lethal	NA	0.8495	NA	212	15	131.9	N	-35	0	0	4	26	230	61	195	256	-49	YES	DPN	270392	0.25538	0.051724138	2.10E-05	2.44E-05	1.60E-05	8.49E-05	1	NA	0.233681462	89.5
YMR303C	ADH2;ADR2	chrXIII	873291	874337	-	HH	650	77	1047	84858	36567	121425	1	YES	SAGA	NA	NA	NA	-0.704545455	0.381670907	NA	NA	NA	NA	NA	NA	0.639541047	17	6.362	3.00E-06	5.902661033	1.735530309	0.223186672	51.5	NA	NA	Lethal	NA	1.00588	NA	NA	6	290.4	Y	-58	4	0.006153846	4	156	21	37	112	170	-245	NO	OPN	50094	0.65911	0.077586207	0.000286338	0.000245097	0.000266043	0.000164884	1	NA	0.085564054	89.5
YMR117C	SPC24	chrXIII	501250	501891	-	HT	253	24	642	22938	9688	32626	0	NO	TFIID	TATA-less	1	TAF1-enriched	-4.5	0.006468237	NA	NA	NA	NA	NA	NA	0.166441751	17	1.467	0.182837	5.667427567	0.059312858	0.042972285	72	25.3	-0.846	Essential	Essential	0	NA	NA	1	106.6	N	-28	0	0	4	12	269	40	241	281	-63	YES	DPN	422540	1.0066	0.083333333	NA	NA	NA	0.000238129	2	NA	0.139625585	89.5
YBR230W-A	YBR230W-A	chrII	680362	680562	+	HH	312	4	201	4878	1109	5987	NA	NA	NA	NA	NA	NA	0.5	0.407743145	NA	NA	NA	NA	NA	NA	NA	NA	NA	NA	7.203883424	0.095254746	0.042842681	NA	NA	NA	Lethal	NA	NA	NA	NA	49	102.2	N	-64	1	0.003205128	2	155	8	56	254	310	-83	YES	DPN	132622	NA	NA	6.62E-05	3.47E-05	6.67E-05	NA	NA	NA	0.45	90
YJR011C	YJR011C;J1438;YJR83.26	chrX	458641	459426	-	HT	369	37	786	33144	11778	44922	0	NO	TFIID	TATA-less	1	TAF1-enriched	-2	0.052996816	G+E	40.52592	0	6.994266	2.968444	0.008544331	0.22234421	15	NA	NA	6.211371543	0.044485799	0.033956521	NA	NA	NA	Lethal	NA	1.01602	0.99354	NA	34	225.6	N	-45	1	0.002710027	4	2	198	47	153	200	-73	NO	OPN	286325	0.3507	0.031609195	4.71E-05	6.01E-05	4.31E-05	3.48E-05	2	NA	0.114649682	90
YDL177C	YDL177C	chrIV	141209	141721	-	HH	376	14	513	16740	6066	22806	0	NO	TFIID	TATA-less	1	TAF1-depleted	0.666666667	0.151392851	G+E	40.52592	0	6.994266	2.968444	0.008544331	0.259934899	17	2.541	0.010863	6.025130332	0.025588815	0.02654964	NA	NA	NA	Lethal	NA	1.0064	1.00918	NA	19	235.6	N	-52	2	0.005319149	3	153	37	15	195	210	-112	UNCLEAR	UNCLEAR	141209	0.13175	0.063218391	4.29E-05	5.85E-06	8.36E-06	0.00016931	3	NA	0.176757813	90.5
YDR124W	YDR124W	chrIV	700315	701289	+	HH	847	25	975	24522	10775	35297	1	YES	TFIID	NA	NA	NA	0.296875	0.430320746	G+E	40.52592	0	6.994266	2.968444	0.008544331	0.303320238	7	NA	NA	4.501197808	0.180290668	0.094331888	NA	NA	NA	Lethal	NA	1.02023	0.98884	131	12	132.5	N	-455	5	0.005903188	4	89	71	9	237	200	-321	NO	OPN	700315	0.4107	0.028735632	5.92E-05	2.06E-05	3.86E-05	1.28E-05	1	NA	0.092915811	90.5
YNL187W	SWT21	chrXIV	287994	289067	+	HT	385	12	1074	20286	6107	26393	0	NO	TFIID	TATA-less	2	TAF1-enriched	-0.514166667	0.250499014	NA	NA	NA	NA	NA	NA	0.100166992	13	NA	NA	5.389097733	0.016178518	0.023602245	NA	NA	NA	Lethal	NA	1.01334	0.95819	33	36	151.2	N	-206	2	0.005194805	5	20	161	45	86	181	-55	NO	OPN	287994	0.24705	0.002873563	NA	NA	NA	1.85E-05	3	NA	0.084342964	90.5
YKR045C	YKR045C	chrXI	523418	523969	-	HT	254	16	552	11670	5260	16930	0	NO	TFIID	TATA-containing	0	TAF1-enriched	-0.12745098	0.843100301	NA	NA	NA	NA	NA	NA	0.12467253	17	1.133	0.367493	5.764905373	0.014107251	0.020602931	62.5	25.975	-0.708	Lethal	NA	1.01256	1.0237	NA	39	290	N	-28	2	0.007874016	4	138	45	166	17	225	-426	NA	NA	142847	0.18427	0.020114943	3.18E-05	2.80E-05	2.47E-05	9.80E-05	1	NA	0.165154265	91
YMR170C	ALD2;ALD5	chrXIII	601562	603082	-	HT	786	142	1521	120597	49744	170341	0	NO	SAGA	NA	NA	NA	NA	1	NA	NA	NA	NA	NA	NA	0.352063181	17	1.813	0.075855	5.089361964	0.244465562	0.097150604	NA	NA	NA	Lethal	NA	0.98019	NA	NA	50	115.5	Y	-26	5	0.006361323	4	76	52	102	26	197	-280	NO	OPN	321349	4.1576	0.048850575	3.69E-05	4.65E-05	0.000332282	0.000417346	3	NA	0.060197368	91.5
YOL047C	YOL047C	chrXV	241614	242747	-	HH	750	50	1071	61005	22314	83319	0	NO	TFIID	NA	NA	NA	-2.355498721	0.004152059	NA	NA	NA	NA	NA	NA	0.416439583	4	NA	NA	2.544771113	0.089835248	0.117780843	NA	NA	NA	Lethal	NA	1.00011	0.9963	NA	NA	216	N	NA	4	0.005333333	4	13	97	NA	NA	193	-172	NO	OPN	241614	1.6639	0.068965517	6.76E-05	7.80E-05	0.001064916	4.14E-05	1	NA	0.080759047	91.5
YHR211W	FLO5	chrVIII	525392	528619	+	HH	3655	42	3228	43077	18427	61504	2	YES	TFIID	NA	NA	NA	NA	NA	G+E	40.52592	0	6.994266	2.968444	0.008544331	1.359232586	17	9.532	0	3.089190321	0.326136152	0.184865047	NA	NA	NA	NA	NA	NA	NA	NA	NA	130.7	NA	-2335	19	0.005198358	4	2	160	40	245	162	-73	NO	OPN	34024	0.50489	NA	1.76E-05	8.89E-06	2.57E-05	2.71E-05	1	NA	0.028509452	92
YML037C	YML037C	chrXIII	204386	205408	-	HH	234	16	1023	14730	5866	20596	0	NO	TFIID	NA	NA	NA	-0.857142857	0.203276379	NA	NA	NA	NA	NA	NA	0.282218163	15	NA	NA	4.66821131	0.016342789	0.02738499	NA	NA	NA	Lethal	NA	1.02729	0.98346	NA	1	122.2	N	-47	1	0.004273504	4	119	2	45	191	236	-77	YES	DPN	204386	0.42001	0.08908046	2.30E-05	1.39E-05	5.91E-05	6.41E-05	2	NA	0.090019569	92
YMR159C	ATG16;APG15;APG16;CVT11;SAP18	chrXIII	574476	574928	-	HH	138	15	453	20823	7365	28188	0	NO	TFIID	TATA-less	1	TAF1-enriched	0.25	0.620601417	NA	NA	NA	NA	NA	NA	0.058498241	17	1.582	0.127308	5.300748731	0.048390979	0.041499703	NA	NA	NA	Lethal	NA	1.00054	NA	64	NA	112.3	N	35	0	0	4	88	139	53	174	227	13	YES	DPN	349503	0.49956	0.045977011	1.75E-05	6.61E-05	0.000113538	0.000583079	2	NA	0.203539823	92
YAL034W-A	MTW1;DSN3;NSL2	chrI	79718	80587	+	HT	283	24	870	21213	10213	31426	1	YES	TFIID	TATA-less	1	TAF1-enriched	-2.175824176	0.006655855	NA	NA	NA	NA	NA	NA	0.025386914	14	NA	NA	5.901369866	0.039381791	0.033627524	90	NA	NA	Essential	Essential	0	NA	NA	16	130.7	N	-29	1	0.003533569	4	19	221	48	192	240	-56	YES	DPN	79718	0.26897	0.014367816	6.71E-05	8.30E-05	0.000135069	0.000112441	2	NA	0.105868815	92
YLR393W	ATP10	chrXII	907079	907918	+	HH	774	21	840	16377	6948	23325	0	NO	TFIID	TATA-less	1	TAF1-enriched	-1.880952381	0.049315517	NA	NA	NA	NA	NA	NA	0.149107537	16	NA	NA	4.855363307	0.070703986	0.054764637	NA	NA	NA	Lethal	NA	0.81056	NA	181	17	358.5	N	-44	4	0.005167959	3	158	13	31	179	210	-88	UNCLEAR	UNCLEAR	170259	0.47374	0.020114943	NA	NA	NA	7.83E-05	1	NA	0.10965435	92
YJR119C	JHD2	chrX	644304	646490	-	HH	636	32	2187	37689	16177	53866	0	NO	TFIID	TATA-less	2	TAF1-enriched	-0.86013986	0.015799176	NA	NA	NA	NA	NA	NA	0.135844159	17	1.352	0.2275	5.570949822	0.050735431	0.040432112	NA	NA	NA	Lethal	NA	1.02586	1.01028	NA	8	158.6	Y	-99	3	0.004716981	3	152	41	58	290	348	-116	YES	DPN	99261	0.47089	0.054597701	0.00020989	6.73E-05	3.13E-05	8.51E-05	1	NA	0.04231473	92.5
YBR182C	SMP1	chrII	593506	594864	-	HT	497	39	1359	32361	11458	43819	0	NO	SAGA	NA	NA	NA	-0.06034124	0.850751223	NA	NA	NA	NA	NA	NA	0.860067417	17	9.498	0	6.002195011	0.072308659	0.044800726	NA	NA	NA	Lethal	NA	1.04153	NA	NA	2	192.1	Y	-163	2	0.004024145	4	50	131	32	207	239	-206	YES	UNCLEAR	218320	0.97731	0.068965517	3.50E-05	9.54E-05	9.83E-05	0.00019777	2	NA	0.068114875	92.5
YPL054W	LEE1	chrXVI	455759	456664	+	HH	769	65	906	70347	23643	93990	1	YES	SAGA	NA	NA	NA	-4.105442177	0.000114543	NA	NA	NA	NA	NA	NA	0.275666667	6	NA	NA	7.653148992	0.087856507	0.038729938	NA	NA	NA	Lethal	NA	1.01697	NA	NA	3	287.2	N	-102	2	0.00260078	2	118	70	32	85	117	-145	NO	OPN	455759	3.7522	0.048850575	0.000156499	0.000127464	0.000149997	7.43E-05	1	NA	0.102209945	92.5
YPL068C	YPL068C	chrXVI	424215	425096	-	HT	155	27	882	24903	10150	35053	0	NO	TFIID	TATA-less	1	TAF1-enriched	-0.274193548	0.54751556	G+E	40.52592	0	6.994266	2.968444	0.008544331	0.070868243	17	0.607	0.864307	5.39121547	0.066306276	0.047762893	NA	NA	NA	Lethal	NA	0.9247	1.0058	NA	21	284	N	-39	0	0	3	16	167	55	128	183	-59	NO	OPN	424215	0.57967	0.077586207	2.73E-05	4.11E-06	3.44E-06	0.000133643	1	NA	0.105561862	93
YFR042W	KEG1	chrVI	238458	239060	+	HH	203	16	603	11577	3095	14672	0	NO	TFIID	TATA-less	1	TAF1-enriched	-0.393665158	0.548617798	NA	NA	NA	NA	NA	NA	0.081296116	17	2.358	0.015313	6.963234505	0.035867898	0.027198311	NA	NA	NA	Essential	Essential	0	1.00939	NA	46	143.5	N	-48	1	0.004926108	4	143	20	28	197	225	-95	YES	DPN	31101	0.48647	0.014367816	3.46E-05	2.27E-05	5.39E-05	0.000166919	1	NA	0.15448505	93
YKL208W	CBT1;SOC1	chrXI	47157	47972	+	HH	862	20	816	21210	8177	29387	0	NO	TFIID	TATA-containing	0	TAF1-enriched	0.062271062	0.895703826	NA	NA	NA	NA	NA	NA	0.464752796	17	1.219	0.317883	6.345398717	0.007774572	0.013895665	NA	NA	NA	Lethal	NA	1.01957	NA	NA	30	112.3	N	-9	4	0.004640371	3	24	210	33	201	297	-285	YES	UNCLEAR	47157	0.53691	0.022988506	4.59E-05	3.17E-05	4.94E-05	5.17E-05	3	NA	0.114110429	93
YCL033C	MXR2;MSRB	chrIII	62776	63282	-	HH	159	24	507	27915	10521	38436	0	NO	TFIID	NA	NA	NA	NA	NA	G+E	40.52592	0	6.994266	2.968444	0.008544331	0.150767942	17	3.204	0.001273	6.912536209	0.020968139	0.020947998	NA	NA	NA	Lethal	NA	1.05031	1.01965	NA	9	220.8	N	35	1	0.006289308	4	22	148	158	13	201	-223	NO	OPN	62776	0.35805	0.07183908	2.58E-05	9.53E-05	2.60E-05	0.000283332	1	NA	0.183794466	93
YPL189C-A	COA2	chrXVI	188307	188513	-	HH	641	10	207	7056	2870	9926	NA	NA	NA	TATA-containing	0	TAF1-enriched	-5.8	0.047029751	NA	NA	NA	NA	NA	NA	NA	NA	NA	NA	7.895880538	0.089315113	0.037849653	NA	NA	NA	Lethal	NA	NA	NA	NA	69	163.3	N	-97	3	0.004680187	3	108	52	45	261	306	-127	YES	DPN	188307	NA	NA	NA	NA	NA	NA	NA	NA	0.451456311	93
YDR504C	SPG3	chrIV	1456311	1456694	-	HT	1	15	384	21096	9224	30320	NA	NA	TFIID	NA	NA	NA	NA	NA	G+E	40.52592	0	6.994266	2.968444	0.008544331	0.126455381	15	NA	NA	6.549802333	0.024657881	0.023974507	NA	NA	NA	Lethal	NA	1.0278	0.97765	NA	7	124.7	N	NA	0	0	4	60	112	NA	NA	247	-187	YES	UNCLEAR	75239	0.37984	0.040229885	4.75E-05	3.30E-05	3.03E-05	0.000239545	1	NA	0.244125326	93.5
YML009C	MRPL39	chrXIII	251304	251516	-	HT	323	56	213	53712	20934	74646	1	YES	TFIID	TATA-less	2	TAF1-enriched	NA	1	NA	NA	NA	NA	NA	NA	0.043224779	17	0.68	0.803238	7.583017956	0.039723719	0.02628348	102.5	24.745	1.683	Lethal	NA	NA	NA	4	71	106.2	N	-42	2	0.00619195	4	10	115	52	73	188	-363	NO	OPN	251304	0.21085	0.045977011	5.71E-05	4.08E-05	7.04E-05	0.000729028	2	NA	0.441037736	93.5
YJL025W	RRN7	chrX	393967	395511	+	HT	364	16	1545	18981	6905	25886	0	NO	TFIID	TATA-less	1	TAF1-enriched	-1.797202797	0.000839563	G+E	40.52592	0	6.994266	2.968444	0.008544331	0.218212757	17	1.933	0.060092	5.684241994	0.017377803	0.023191288	NA	NA	NA	Essential	Essential	0	NA	NA	23	210.8	N	-78	2	0.005494505	3	129	6	72	219	291	-81	YES	DPN	350240	0.30853	0.135057471	6.06E-05	3.09E-05	7.25E-05	5.12E-05	2	NA	0.060880829	94
YPL052W	OAZ1	chrXVI	458799	459678	+	HH	341	34	879	40956	13882	54838	0	NO	TFIID	NA	NA	NA	-0.495098039	0.40310452	G+E	40.52592	0	6.994266	2.968444	0.008544331	0.115461459	17	3.222	0.001726	6.53656155	0.067323998	0.039694981	NA	NA	NA	Lethal	NA	1.01957	1.01006	NA	14	141.3	N	-57	3	0.008797654	4	149	13	44	66	185	-198	NO	OPN	458799	0.41115	0.057471264	0.000365484	5.60E-05	5.32E-05	0.001689338	1	NA	0.106939704	94
YDL104C	QRI7	chrIV	273653	274876	-	HT	272	16	1224	15399	6867	22266	0	NO	TFIID	TATA-less	2	TAF1-depleted	-0.730769231	0.122227987	NA	NA	NA	NA	NA	NA	1.007130266	15	NA	NA	5.97553515	0.030037743	0.02900393	NA	NA	NA	Lethal	NA	1.03684	NA	NA	6	144.4	N	-21	1	0.003676471	4	15	212	36	191	227	-60	YES	DPN	273653	0.26568	0.020114943	0.000147289	5.83E-05	0.000129404	0.0001917	2	NA	0.077269011	94.5
YDR201W	SPC19	chrIV	856317	856814	+	HH	224	10	498	9933	4657	14590	0	NO	TFIID	NA	NA	NA	-1.133333333	0.189538868	NA	NA	NA	NA	NA	NA	0.125889341	17	2.091	0.032388	6.925307588	0.016555391	0.018579356	NA	NA	NA	Essential	Essential	0	NA	NA	37	128.9	N	-29	1	0.004464286	4	50	207	79	178	257	-25	YES	DPN	675119	0.17323	0.011494253	NA	NA	NA	7.71E-05	2	NA	0.190140845	94.5
YOR044W	IRC23	chrXV	413007	413480	+	HT	677	28	474	37338	13706	51044	0	NO	TFIID	TATA-less	1	TAF1-enriched	-1.785714286	0.074994563	G+E	40.52592	0	6.994266	2.968444	0.008544331	0.221335666	17	1.904	0.050919	6.829447202	0.018606446	0.019973132	63	NA	NA	Lethal	NA	1.00817	0.98868	52	16	274	N	-299	5	0.007385524	5	50	70	65	92	164	-145	NO	OPN	413007	0.37246	0.100574713	NA	NA	NA	5.56E-05	2	NA	0.199788584	94.5
YDR503C	LPP1	chrIV	1455042	1455866	-	HT	445	16	825	10482	3279	13761	1	YES	TFIID	TATA-less	2	TAF1-enriched	-0.92	0.19248502	NA	NA	NA	NA	NA	NA	0.250130144	17	4.709	3.80E-05	6.523920314	0.027849862	0.025580138	44.5	NA	NA	Lethal	NA	1.02009	NA	NA	25	85	N	-83	3	0.006741573	3	151	24	59	182	241	-99	YES	DPN	76067	0.25312	0.057471264	0.000122208	9.08E-05	5.30E-05	0.000146409	2	NA	0.115291262	95
YLR080W	EMP46	chrXII	287916	289250	+	HT	242	47	1335	47766	16073	63839	0	NO	TFIID	NA	NA	NA	-2.333333333	0.101808153	NA	NA	NA	NA	NA	NA	0.107774309	17	3.129	0.00189	5.172382733	0.047143507	0.04197786	NA	NA	NA	Lethal	NA	0.98642	0.99854	NA	1	126.1	Y	69	1	0.004132231	4	80	134	11	203	214	5	UNCLEAR	UNCLEAR	287916	1.4626	0.066091954	0.000200766	0.000130741	0.000170383	1.06E-05	1	NA	0.071214393	95
YGR154C	GTO1	chrVII	796798	797868	-	HH	675	22	1071	31296	14622	45918	0	NO	TFIID	NA	NA	NA	-0.111111111	0.765034906	G+E	40.52592	0	6.994266	2.968444	0.008544331	5.166651667	15	NA	NA	5.776323401	0.119435527	0.059829485	NA	NA	NA	Lethal	NA	1.0301	1.02919	NA	16	185.5	Y	-310	3	0.004444444	3	135	13	154	223	377	-231	YES	UNCLEAR	293072	0.78964	0.068965517	0.000408054	0.000156942	0.000278686	5.48E-05	1	NA	0.088785047	95
YKL050C	YKL050C;YKL263;YKL301	chrXI	342852	345620	-	HT	455	21	2769	24762	9448	34210	0	NO	TFIID	NA	NA	NA	-0.570276498	0.044381962	NA	NA	NA	NA	NA	NA	0.205960833	17	1.55	0.136214	5.011805005	0.035295223	0.037485542	NA	NA	NA	Lethal	NA	1.00533	1.022	NA	NA	176.3	Y	NA	3	0.006593407	4	39	130	NA	NA	169	-36	NO	OPN	321196	1.5608	0.034482759	8.26E-05	4.81E-05	4.64E-05	1.49E-05	3	NA	0.034501445	95.5
YIL009C-A	EST3	chrIX	335666	336212	-	HH	3132	24	546	23673	10470	34143	0	NO	TFIID	TATA-less	1	TAF1-enriched	-2.946666667	0.005524832	NA	NA	NA	NA	NA	NA	0.1124089	17	2.597	0.010495	6.849535402	0.034808134	0.027238253	NA	NA	NA	Lethal	NA	0.9749	NA	52	18	166.9	N	-12	17	0.005427842	4	3	115	15	103	228	-190	YES	UNCLEAR	103676	0.58012	0.014367816	0.000151216	8.31E-05	0.000332327	0.001238993	NA	NA	0.174908425	95.5
YLL049W	LDB18	chrXII	40666	41205	+	HH	252	30	540	26544	9876	36420	0	NO	TFIID	TATA-less	1	TAF1-enriched	-1.975	0.029148642	G+E	40.52592	0	6.994266	2.968444	0.008544331	0.023632596	17	0.713	0.768784	6.894284398	0.026992816	0.023830596	NA	NA	NA	Lethal	NA	1.01912	0.98481	175	NA	284.9	N	-25	1	0.003968254	5	23	128	48	103	184	-203	NO	OPN	40666	0.17127	0.094827586	NA	NA	NA	0.00161257	3	NA	0.177179963	95.5
YML066C	SMA2	chrXIII	140424	141533	-	HH	677	30	1110	38055	14565	52620	0	NO	SAGA/TFIID	NA	NA	NA	-1.67826087	0.017219242	NA	NA	NA	NA	NA	NA	0.636433333	4	NA	NA	2.22802347	0.122684446	0.157208126	NA	NA	NA	Lethal	NA	0.98144	1.01109	30	NA	114.8	N	-420	4	0.005908419	3	125	73	178	2	180	-317	NO	OPN	140424	0.32122	0.020114943	0.000101371	0.000127897	6.76E-05	0.000956671	1	NA	0.086564472	96
YMR056C	AAC1	chrXIII	387315	388244	-	HH	578	46	930	48882	21672	70554	0	NO	TFIID	TATA-less	3	TAF1-enriched	-9	5.07E-06	G+E	40.52592	0	6.994266	2.968444	0.008544331	0.496527041	17	4.455	6.70E-05	6.250491495	0.044430346	0.033722959	NA	NA	NA	Lethal	NA	1.01536	NA	18	13	122.9	Y	NA	1	0.001730104	2	215	470	NA	NA	109	-545	NA	NA	387315	0.78279	0.034482759	NA	NA	NA	0.000626352	1	NA	0.103336921	96
YMR187C	YMR187C;YM8010.17C	chrXIII	634689	635984	-	HT	307	23	1296	21483	10851	32334	0	NO	TFIID	NA	NA	NA	-0.746317512	0.215783023	NA	NA	NA	NA	NA	NA	0.031671429	17	0.306	0.99435	6.121339697	0.021984706	0.024222215	NA	NA	NA	Lethal	NA	1.01326	0.99191	34	10	120.9	N	-22	2	0.006514658	4	130	42	152	20	194	-117	NO	OPN	288447	0.16761	0.086206897	0.000141758	4.07E-05	0.000116944	0.000351894	3	NA	0.074517375	96.5
YNL214W	PEX17;PAS9	chrXIV	245617	246216	+	HT	187	13	600	18399	5560	23959	0	NO	TFIID	NA	NA	NA	0.090909091	0.85314617	NA	NA	NA	NA	NA	NA	0.329037205	17	1.277	0.26024	6.365034402	0.034246842	0.029074316	NA	NA	NA	Lethal	NA	1.02063	NA	NA	16	145.8	N	-21	0	0	4	9	200	30	179	209	-66	UNCLEAR	UNCLEAR	245617	0.24278	0.07183908	7.03E-05	4.30E-05	3.48E-05	8.04E-06	3	NA	0.161101836	96.5
YLR284C	ECI1	chrXII	706198	707040	-	HH	320	27	843	31551	13938	45489	0	NO	TFIID	NA	NA	NA	-0.282051282	0.581593944	G+E	40.52592	0	6.994266	2.968444	0.008544331	0.402198491	15	NA	NA	5.690332728	0.020545295	0.025189441	NA	NA	NA	Lethal	NA	1.0284	NA	NA	19	246.7	Y	-62	2	0.00625	4	135	47	15	128	170	-265	NO	OPN	371137	1.0591	0.126436782	0.000104408	0.000101933	0.000186685	1.83E-05	2	NA	0.114608076	96.5
YDR462W	MRPL28	chrIV	1386073	1386516	+	HH	307	17	444	16944	5095	22039	0	NO	TFIID	TATA-less	2	TAF1-enriched	-10.375	0.001130997	NA	NA	NA	NA	NA	NA	0.121021501	17	1.469	0.160459	7.474941298	0.031239592	0.023645303	177.5	20.94	0.503	Lethal	NA	0.7978	NA	5	39	104.7	N	-54	2	0.006514658	4	137	22	32	134	166	-97	NO	OPN	145417	0.27515	0.051724138	3.03E-05	1.03E-05	4.32E-05	0.000386621	2	NA	0.218961625	97
YCR060W	TAH1	chrIII	224399	224734	+	HH	169	31	336	29727	9302	39029	0	NO	TFIID	TATA-containing	0	TAF1-enriched	-2.076923077	0.155917628	NA	NA	NA	NA	NA	NA	0.299071986	17	3.659	0.000657	6.393030547	0.105039857	0.050695602	75.5	27.545	1.342	Lethal	NA	1.00385	0.96808	NA	NA	258.2	N	-13	0	0	4	68	170	81	157	238	-7	YES	DPN	91886	0.26148	0.014367816	6.65E-05	1.96E-05	2.06E-05	4.61E-05	1	NA	0.289552239	97
YLR154C	RNH203	chrXII	447982	448314	-	HH	6382	43	333	55209	16652	71861	0	NO	TFIID	TATA-less	2	TAF1-enriched	-0.125	0.870107503	G+E	40.52592	0	6.994266	2.968444	0.008544331	0.139025973	17	2.812	0.003526	7.261964679	0.144033946	0.05226107	NA	NA	NA	Lethal	NA	1.00794	1.00374	7	35	93.9	N	-55	17	0.002663742	4	166	19	36	173	209	-94	UNCLEAR	UNCLEAR	447982	0.27867	0.048850575	8.07E-05	3.52E-05	0.000140993	0.000305218	3	NA	0.292168675	97
YGR043C	NQM1	chrVII	580435	581436	-	HT	1554	52	1002	53235	21045	74280	NA	YES	SAGA	NA	NA	NA	-1.22826087	0.20701843	G+E	40.52592	0	6.994266	2.968444	0.008544331	1.233331696	8	NA	NA	5.397131609	0.487473912	0.129363775	NA	NA	NA	Lethal	NA	1.03116	1.01255	37	4	121.1	Y	-255	9	0.005791506	2	138	68	187	170	357	-143	YES	DPN	509504	6.4511	0.005747126	NA	NA	NA	0.001238943	2	NA	0.096903097	97
YPL148C	PPT2	chrXVI	272294	272815	-	HH	440	34	522	42021	16161	58182	0	NO	TFIID	TATA-containing	0	TAF1-depleted	-0.30952381	0.674420911	NA	NA	NA	NA	NA	NA	0.096587825	17	1.579	0.130426	6.225281137	0.039733675	0.032019932	NA	NA	NA	Lethal	NA	0.58831	NA	242	50	324.7	N	-137	3	0.006818182	5	56	79	58	129	187	-154	NO	OPN	272294	0.47431	0.074712644	7.60E-05	1.61E-05	8.01E-05	1.83E-05	3	NA	0.187140115	97.5
YMR228W	MTF1	chrXIII	724626	725651	+	HH	241	22	1026	22665	11081	33746	0	NO	TFIID	TATA-less	1	TAF1-enriched	-0.894736842	0.267312353	NA	NA	NA	NA	NA	NA	0.067801572	17	1.674	0.09615	6.589073709	0.01526168	0.018748944	NA	NA	NA	Lethal	NA	0.75847	NA	NA	24	253.3	N	-8	0	0	4	1	256	9	248	257	-74	YES	DPN	198780	0.34933	0.126436782	2.03E-05	4.71E-06	6.91E-06	0.000957057	2	NA	0.095609756	98
YJR048W	CYC1	chrX	526335	526664	+	HH	954	85	330	85680	38983	124663	1	YES	TFIID	TATA-containing	0	TAF1-depleted	NA	0.048328485	G+E	40.52592	0	6.994266	2.968444	0.008544331	0.290211004	17	2.861	0.003079	9.981911821	0.045526501	0.021375605	160	28.71	7.206	Lethal	NA	0.94717	NA	NA	58	136.7	Y	-46	2	0.002096436	2	50	408	96	362	458	-25	YES	DPN	219087	1.1603	0.045977011	6.73E-05	6.86E-05	0.000311931	0.000517224	1	7	0.29787234	98
YPL250C	ICY2	chrXVI	74309	74719	-	HT	980	57	411	70281	24932	95213	1	YES	SAGA	TATA-containing	0	TAF1-depleted	0.2	0.746638974	G+E	40.52592	0	6.994266	2.968444	0.008544331	1.449553172	14	NA	NA	7.696701175	0.063505262	0.032741625	NA	NA	NA	Lethal	NA	1.00563	NA	NA	14	191.7	N	-142	2	0.002040816	1	240	23	119	781	NA	NA	NA	NA	74309	1.6383	0.020114943	0.000611719	7.12E-05	0.000216444	7.05E-05	1	NA	0.23902439	98
YFR007W	YFH7;AIM12	chrVI	159299	160360	+	HT	1547	21	1062	23265	11522	34787	0	NO	TFIID	TATA-less	1	TAF1-enriched	-0.106312292	0.829615195	G+E	40.52592	0	6.994266	2.968444	0.008544331	0.168814527	17	0.637	0.833792	6.380792936	0.021137558	0.022785195	NA	NA	NA	Lethal	NA	1.01527	1.01898	NA	27	93.1	N	213	8	0.005171299	4	203	40	103	10	175	-115	NO	OPN	109801	0.31199	0.063218391	NA	NA	NA	1.17E-05	2	NA	0.092365693	98
YGL010W	YGL010W;YGL021	chrVII	475545	476069	+	HH	298	28	525	25218	13680	38898	0	NO	TFIID	TATA-less	1	TAF1-enriched	-3.636363636	0.006171667	NA	NA	NA	NA	NA	NA	0.330352514	17	1.829	0.06119	6.50887044	0.020981471	0.022254218	54.5	NA	NA	Lethal	NA	1.04746	0.99529	NA	17	123.2	N	-50	2	0.006711409	4	122	40	10	97	175	-222	NO	OPN	475545	0.58741	0.017241379	NA	NA	NA	0.000118401	2	NA	0.187022901	98
YML050W	AIM32	chrXIII	173139	174074	+	HT	238	20	936	22155	8347	30502	1	YES	TFIID	NA	NA	NA	-0.085714286	0.820196249	NA	NA	NA	NA	NA	NA	0.12723591	17	1.679	0.101516	5.96919558	0.0284032	0.028233702	NA	NA	NA	Lethal	NA	1.065	0.95426	NA	4	119.5	N	-18	1	0.004201681	4	38	176	56	158	214	-37	UNCLEAR	UNCLEAR	173139	0.21742	0.028735632	NA	NA	NA	0.001344939	2	NA	0.104812834	98
YDL183C	YDL183C;D1293	chrIV	130871	131833	-	HH	1604	27	963	24198	10738	34936	0	NO	TFIID	NA	NA	NA	-0.153153153	0.756147086	NA	NA	NA	NA	NA	NA	0.270413829	16	NA	NA	6.0956013	0.025606334	0.026251683	NA	NA	NA	Lethal	NA	1.01445	1.01476	NA	12	208.7	N	-74	6	0.003740648	3	109	79	183	5	265	-154	YES	UNCLEAR	130871	0.68584	0.060344828	0.000160421	7.20E-06	0.000481354	2.55E-05	1	NA	0.102390852	98.5
YGL047W	ALG13	chrVII	411552	412160	+	HH	266	20	609	21195	16467	37662	0	NO	TFIID	NA	NA	NA	-0.888111888	0.184060989	G+E	40.52592	0	6.994266	2.968444	0.008544331	0.335768209	17	3.04	0.00187	6.481865898	0.021481127	0.022611454	NA	NA	NA	Essential	Essential	0	0.97848	NA	48	112.2	N	-87	1	0.003759398	3	127	36	51	186	237	-111	YES	DPN	411552	0.66436	0.07183908	NA	NA	NA	0.000125812	2	NA	0.162006579	98.5
YPL113C	YPL113C	chrXVI	335953	337143	-	HT	293	31	1191	28065	21569	49634	3	YES	NA	NA	NA	NA	-1.194326241	0.047791704	NA	NA	NA	NA	NA	NA	0.17564881	14	NA	NA	4.450455237	0.182771542	0.096061608	NA	NA	NA	Lethal	NA	1.01131	1.00121	NA	5	224.1	Y	-15	1	0.003412969	3	10	213	25	198	223	-65	UNCLEAR	UNCLEAR	335953	0.38254	0.043103448	3.46E-05	1.52E-05	6.95E-05	4.22E-05	2	NA	0.083193277	99
YNR063W	YNR063W;N3531	chrXIV	746943	748766	+	HH	1600	31	1824	40560	14236	54796	0	NO	TFIID	TATA-less	1	TAF1-enriched	NA	NA	NA	NA	NA	NA	NA	NA	0.260454453	13	NA	NA	4.139566248	0.076439486	0.066788862	NA	NA	NA	Lethal	NA	1.01211	1.02995	NA	1	192.7	N	-75	9	0.005625	4	132	56	19	174	193	-131	NO	OPN	35567	0.4525	0.074712644	9.34E-05	2.14E-05	4.34E-05	0.000236988	3	NA	0.054306089	99
YNL070W	TOM7;MOM7	chrXIV	493366	493548	+	HT	395	64	183	53559	31395	84954	0	NO	TFIID	TATA-less	2	TAF1-enriched	NA	1	G+E	40.52592	0	6.994266	2.968444	0.008544331	0.038379666	17	1.383	0.196901	8.675491019	0.014701667	0.013976204	74.5	29.15	4.019	Lethal	NA	0.99805	NA	4	47	106.7	N	-53	3	0.007594937	4	132	46	7	168	175	-121	NO	OPN	290785	0.34836	0.068965517	8.63E-06	6.94E-05	2.44E-05	0.000161163	2	NA	0.543956044	99
YMR096W	SNZ1	chrXIII	458408	459301	+	HH	449	51	894	55764	20211	75975	1	YES	SAGA	NA	NA	NA	-5.8625	3.65E-05	NA	NA	NA	NA	NA	NA	2.438647665	17	11.66	0	7.486628158	0.321760583	0.075767011	NA	NA	NA	Lethal	NA	1.0138	NA	76	23	144.6	Y	-29	2	0.004454343	4	65	149	94	120	214	-10	UNCLEAR	UNCLEAR	458408	1.4892	0.037356322	0.000452347	7.93E-05	0.00010885	0.00154522	2	NA	0.111422172	99.5
YOL107W	YOL107W	chrXV	112102	113130	+	HH	216	26	1029	24237	9284	33521	0	NO	TFIID	NA	NA	NA	-1.580246914	0.044325291	NA	NA	NA	NA	NA	NA	0.238861423	15	NA	NA	5.984769558	0.040194665	0.03349938	NA	NA	NA	Lethal	NA	0.99815	1.05273	NA	13	133.5	N	-52	0	0	3	10	266	62	214	276	-65	YES	DPN	112102	0.87216	0.100574713	0.000203015	9.79E-05	6.18E-05	0.000139861	2	NA	0.097276265	100
YLR030W	YLR030W	chrXII	203290	204081	+	HH	700	31	792	37245	18705	55950	0	NO	SAGA/TFIID	NA	NA	NA	NA	NA	NA	NA	NA	NA	NA	NA	0.135087464	13	NA	NA	4.691207178	0.486517613	0.148684149	NA	NA	NA	Lethal	NA	1.0127	0.98938	NA	NA	187.6	N	NA	3	0.004285714	3	98	106	NA	NA	207	-181	UNCLEAR	UNCLEAR	203290	0.36601	0.040229885	7.56E-05	0.00021225	0.000170542	0.000106511	3	NA	0.12642225	100
YPR066W	UBA3	chrXVI	681213	682112	+	HT	414	19	900	21879	9322	31201	0	NO	TFIID	NA	NA	NA	-0.316666667	0.552907051	NA	NA	NA	NA	NA	NA	0.922842293	15	NA	NA	5.640625007	0.026719755	0.028979375	NA	NA	NA	Lethal	NA	0.95572	NA	55	2	344.3	Y	-4	2	0.004830918	4	71	56	75	52	283	-131	YES	DPN	265954	0.25055	0.031609195	NA	NA	NA	0.000434308	2	NA	0.111234705	100
YLR218C	COA4;CMC3	chrXII	573466	573918	-	HH	233	26	453	25443	8895	34338	3	YES	TFIID	TATA-less	2	TAF1-enriched	0.152941176	0.750029488	NA	NA	NA	NA	NA	NA	0.280836881	17	3.089	0.001633	6.190659803	0.092495244	0.049127285	76	27.32	1.708	Lethal	NA	1.00954	1.00454	80	NA	272.1	N	153	1	0.004291845	3	158	105	5	258	201	-180	NO	OPN	504259	0.33631	0.028735632	2.16E-05	4.80E-05	6.36E-05	0.000242384	3	NA	0.222345133	100.5
YDR253C	MET32	chrIV	963990	964565	-	HH	548	35	576	32919	11553	44472	1	YES	TFIID	TATA-less	2	TAF1-enriched	-2.625	0.053067415	NA	NA	NA	NA	NA	NA	1.276050729	16	NA	NA	6.341052363	0.031080277	0.027802324	NA	NA	NA	Lethal	NA	1.00303	NA	29	17	158.1	Y	245	3	0.005474453	3	100	32	21	145	321	-277	YES	UNCLEAR	567368	0.53292	0.020114943	NA	NA	NA	0.000205986	3	NA	0.174782609	100.5
YFR008W	FAR7	chrVI	160535	161200	+	HT	175	22	666	29964	17446	47410	0	NO	TFIID	TATA-less	1	TAF1-enriched	-1.908653846	0.039155163	NA	NA	NA	NA	NA	NA	0.23499823	17	5.582	7.00E-05	5.715401344	0.011770577	0.018982445	NA	NA	NA	Lethal	NA	1.02009	1.02218	110	14	83.7	N	-4	1	0.005714286	3	181	13	185	9	219	-88	UNCLEAR	UNCLEAR	108961	0.17015	0.040229885	NA	NA	NA	5.55E-05	2	NA	0.15112782	100.5
YGR201C	YGR201C;G7727	chrVII	902520	903197	-	HT	277	21	678	19242	8608	27850	3	YES	TFIID	NA	NA	NA	-0.821875	0.20666551	G+E	40.52592	0	6.994266	2.968444	0.008544331	0.073815257	17	1.183	0.322055	6.43124489	1.240964237	0.173214636	NA	NA	NA	Lethal	NA	1.02563	1.01388	NA	4	128.6	Y	-4	1	0.003610108	3	49	164	53	160	213	-26	UNCLEAR	UNCLEAR	187743	1.9195	0.086206897	NA	NA	NA	1.91E-05	1	NA	0.14844904	100.5
YLR275W	SMD2	chrXII	694378	694800	+	HT	496	35	333	34536	13902	48438	0	NO	TFIID	TATA-less	2	TAF1-enriched	-2.15	0.215030405	NA	NA	NA	NA	NA	NA	0.074832435	17	1.073	0.411856	6.540590409	0.017359549	0.020144304	NA	NA	NA	Essential	Essential	0	NA	NA	12	229.1	N	-55	3	0.006048387	3	186	18	37	221	258	-93	YES	DPN	383377	0.26396	0.005747126	3.54E-05	1.63E-05	7.67E-06	5.25E-05	3	NA	0.239336493	101
YBR033W	EDS1	chrII	301944	304703	+	HT	690	25	2760	33357	14136	47493	3	YES	TFIID	NA	NA	NA	-0.428490028	0.08347259	G+E	40.52592	0	6.994266	2.968444	0.008544331	0.981601556	13	NA	NA	4.886262162	0.125615717	0.072534601	NA	NA	NA	Lethal	NA	1.02852	1.0049	150	6	157	Y	NA	2	0.002898551	2	94	86	NA	NA	180	-161	NO	OPN	301944	0.26177	0.043103448	4.78E-05	2.66E-05	5.39E-05	4.20E-05	2	NA	0.036607466	101
YMR112C	MED11	chrXIII	494100	494495	-	HH	504	40	396	41904	16689	58593	0	NO	TFIID	TATA-containing	0	TAF1-depleted	-0.472727273	0.54006851	G+E	40.52592	0	6.994266	2.968444	0.008544331	0.051946749	17	1.901	0.048242	6.508584234	0.053656941	0.035589872	55.5	NA	NA	Essential	Essential	0	NA	NA	10	143.7	N	34	3	0.005952381	4	72	103	38	137	180	-178	NO	OPN	429936	0.25324	0.068965517	8.87E-05	4.22E-05	5.78E-05	0.001214589	1	NA	0.255696203	101
YNL314W	DAL82;DURM	chrXIV	44447	45214	+	HH	167	14	768	17034	7781	24815	0	NO	TFIID	NA	NA	NA	-4.46	0.000741844	G+E	40.52592	0	6.994266	2.968444	0.008544331	0.079490189	17	1.51	0.144154	6.056175883	0.020421301	0.023596263	NA	NA	NA	Lethal	NA	1.04967	NA	39	8	131.4	N	-3	1	0.005988024	4	152	15	155	12	188	-90	NO	OPN	44447	0.18566	0.011494253	0.000116326	6.75E-05	4.19E-05	3.79E-05	3	NA	0.131681877	101
YNL009W	IDP3	chrXIV	614821	616083	+	HT	461	36	1263	43533	22194	65727	1	YES	TFIID	TATA-less	2	TAF1-enriched	-1.158602151	0.035021287	NA	NA	NA	NA	NA	NA	0.076369315	17	0.883	0.597108	4.992273235	0.034838917	0.03738815	NA	NA	NA	Lethal	NA	1.01368	NA	NA	11	150.8	Y	NA	3	0.006507592	3	165	20	NA	NA	274	-242	YES	UNCLEAR	168250	1.7826	0.08045977	NA	NA	NA	3.22E-05	3	NA	0.080031696	101
YPL077C	YPL077C	chrXVI	409368	410090	-	HH	353	27	723	28245	10558	38803	0	NO	TFIID	NA	NA	NA	-2.945454545	0.023260999	NA	NA	NA	NA	NA	NA	0.451213748	15	NA	NA	5.692053401	0.030051965	0.030455622	NA	NA	NA	Lethal	NA	1.01929	1.00938	NA	5	242.9	N	-28	2	0.005665722	4	178	3	25	226	251	-78	YES	DPN	409368	0.32521	0.040229885	3.81E-05	2.33E-05	3.08E-05	2.78E-05	3	NA	0.140581717	101.5
YOL071W	EMI5;SDH5	chrXV	196507	196995	+	HT	170	46	489	44067	18026	62093	0	NO	TFIID	TATA-containing	0	TAF1-enriched	-5.416666667	0.005733797	NA	NA	NA	NA	NA	NA	0.154977678	17	2.102	0.028889	7.190218686	0.029346653	0.023825235	NA	NA	NA	Lethal	NA	0.98962	1.00196	NA	11	217.5	N	17	0	0	4	53	190	36	207	243	-22	YES	DPN	196507	0.82116	0.031609195	NA	NA	NA	0.000806529	2	NA	0.207991803	101.5
YLR457C	NBP1	chrXII	1055812	1056771	-	HH	563	19	960	20421	7207	27628	0	NO	TFIID	NA	NA	NA	-0.821428571	0.173967955	NA	NA	NA	NA	NA	NA	0.071674605	16	NA	NA	5.542446771	0.030117588	0.031311838	101	NA	NA	Essential	Essential	0	NA	NA	17	120.3	N	14	3	0.005328597	5	34	150	20	164	184	-41	NO	OPN	21406	0.26189	0.051724138	1.58E-05	2.47E-05	1.93E-05	4.62E-05	3	NA	0.106360792	102
YNL222W	SSU72	chrXIV	229094	229714	+	HT	240	31	621	42828	18152	60980	0	NO	TFIID	TATA-less	2	TAF1-enriched	1	0.357677058	G+E	40.52592	0	6.994266	2.968444	0.008544331	0.079161285	17	1.437	0.17123	6.763268464	0.016329663	0.018894351	NA	NA	NA	Essential	Essential	0	NA	NA	21	47.7	N	-37	0	0	4	24	254	61	217	278	-51	YES	DPN	229094	0.16781	0.094827586	4.36E-05	3.47E-05	1.41E-05	3.54E-05	3	NA	0.164516129	102
YHR075C	PPE1	chrVIII	248439	249641	-	HH	1460	20	1203	23370	8163	31533	0	NO	TFIID	NA	NA	NA	-1.611336032	0.024256522	G+E	40.52592	0	6.994266	2.968444	0.008544331	0.266569508	15	NA	NA	5.890980336	0.026198747	0.027475948	NA	NA	NA	Lethal	NA	1.01114	NA	NA	8	106.3	N	-45	8	0.005479452	4	147	14	31	211	242	-89	YES	DPN	248439	0.36209	0.040229885	4.63E-05	6.43E-05	0.000121991	0.000118581	2	NA	0.084858569	102
YKR103W	NFT1	chrXI	653080	656736	+	HT	3215	13	3657	15357	4982	20339	2	YES	NA	NA	NA	NA	NA	NA	NA	NA	NA	NA	NA	NA	0.415926089	10	NA	NA	4.411675756	0.883105932	0.213011385	NA	NA	NA	Lethal	NA	1.00713	1.00887	NA	NA	175.3	Y	NA	18	0.005598756	4	15	165	NA	NA	180	-60	NO	OPN	10080	0.26582	0.045977011	0.000131806	0.000205893	4.15E-05	3.14E-05	3	NA	0.027899344	102
YJL181W	YJL181W;J0435	chrX	85660	87495	+	HT	324	6	1836	4671	2357	7028	1	YES	TFIID	TATA-less	2	TAF1-enriched	0.045454545	0.848705744	NA	NA	NA	NA	NA	NA	0.089957066	17	1.675	0.100864	5.811955529	0.018443769	0.023366978	NA	NA	NA	Lethal	NA	1.02028	0.9596	NA	12	191.8	Y	-22	2	0.00617284	3	165	9	13	283	296	-84	YES	DPN	85660	0.27855	0.002873563	0.000165281	0.000214645	0.000341064	0.000117064	3	NA	0.055585831	102
YGR203W	YCH1	chrVII	905237	905683	+	HH	489	44	447	48189	23712	71901	0	NO	TFIID	TATA-less	1	TAF1-enriched	-0.178571429	0.78258462	G+E	40.52592	0	6.994266	2.968444	0.008544331	0.116316528	17	1.297	0.248146	5.783566653	0.039059426	0.034171747	139.5	22.055	0.551	Lethal	NA	1.01978	1.02863	NA	56	94.7	N	-11	4	0.008179959	4	368	45	379	34	178	-382	NO	OPN	185257	0.1518	0.097701149	NA	NA	NA	0.00012399	1	NA	0.228699552	102
YNR002C	ATO2;FUN34	chrXIV	633008	633856	-	HT	488	44	849	60033	26459	86492	1	YES	TFIID	NA	NA	NA	-12.38333333	9.31E-06	NA	NA	NA	NA	NA	NA	0.274808974	13	NA	NA	4.941137889	0.226607704	0.096340825	NA	NA	NA	Lethal	NA	1.02227	NA	NA	25	124.5	Y	NA	3	0.006147541	3	151	31	NA	NA	252	-289	YES	UNCLEAR	150477	3.9499	0.08045977	NA	NA	NA	9.61E-05	2	NA	0.120283019	102
YBR282W	MRPL27	chrII	768240	768680	+	HH	634	27	441	27297	13234	40531	0	NO	TFIID	TATA-less	1	TAF1-depleted	-1.05	0.377162129	NA	NA	NA	NA	NA	NA	0.086614908	17	1.529	0.134428	7.889473294	0.038535596	0.024881871	86	24.94	0.203	Lethal	NA	0.57744	NA	NA	37	168.4	N	-39	4	0.006309148	5	10	97	49	58	173	-172	NO	OPN	44504	0.21655	0.132183908	2.66E-05	1.14E-05	2.40E-05	8.74E-05	2	NA	0.232954545	102.5
YMR194C-B	CMC4	chrXIII	652594	652887	-	HH	1147	13	222	14781	6064	20845	NA	NA	NA	NA	NA	NA	-0.333333333	0.718026644	NA	NA	NA	NA	NA	NA	NA	NA	NA	NA	8.042736084	0.108837571	0.041019051	NA	NA	NA	Lethal	NA	NA	NA	NA	45	127	N	-26	2	0.001743679	1	495	93	521	67	NA	NA	NA	NA	271544	NA	NA	0.000248388	5.08E-05	0.00011849	NA	NA	NA	0.351535836	103
YML101C	CUE4	chrXIII	69735	70088	-	HH	50	37	354	45150	18083	63233	0	NO	TFIID	TATA-containing	0	TAF1-enriched	NA	NA	G+E	40.52592	0	6.994266	2.968444	0.008544331	0.080828838	17	1.281	0.252801	6.645636691	0.029252439	0.025736201	186.5	22.34	2.031	Lethal	NA	1.0036	0.9939	NA	28	122.4	N	-37	0	0	0	357	1277	394	1240	NA	NA	NA	NA	69735	0.35795	0.022988506	2.10E-05	5.47E-05	4.00E-05	0.001085105	2	NA	0.291784703	103
YMR034C	YMR034C;YM9973.08C	chrXIII	339418	340722	-	HH	420	186	1305	207465	95689	303154	1	YES	TFIID	NA	NA	NA	-3.147058824	0.000491733	NA	NA	NA	NA	NA	NA	0.88594555	16	NA	NA	4.383358914	0.076055204	0.062915469	NA	NA	NA	Lethal	NA	1.031	0.97753	NA	24	143.3	N	-133	2	0.004761905	4	17	170	150	37	187	-58	NO	OPN	339418	0.39847	0.068965517	8.44E-05	6.80E-05	3.43E-05	0.00049853	1	NA	0.07898773	103
YCR075C	ERS1	chrIII	248033	248815	-	HH	160	27	783	29742	13250	42992	0	NO	TFIID	TATA-less	2	TAF1-depleted	-1.65	0.053782811	NA	NA	NA	NA	NA	NA	0.215102428	17	4.32	0.000103	6.657674418	0.02819427	0.025220743	NA	NA	NA	Lethal	NA	1.01391	NA	133	2	244.8	N	-21	0	0	4	45	192	66	171	237	-30	YES	DPN	67805	0.30303	0.043103448	0.000371392	0.000122849	7.04E-05	0.000338344	1	NA	0.131713555	103
YLR073C	RFU1	chrXII	281019	281621	-	HT	335	39	603	43299	12397	55696	0	NO	TFIID	TATA-less	1	TAF1-enriched	0.636678201	0.117735374	G+E	40.52592	0	6.994266	2.968444	0.008544331	0.742138689	17	3.004	0.002465	6.155072688	0.061636855	0.040335463	87	23.23	-1.384	Lethal	NA	1.03484	0.97599	29	27	105.7	N	-120	1	0.002985075	4	83	87	33	237	270	-162	YES	UNCLEAR	281019	0.56811	0.025862069	6.70E-05	0.000199654	0.000252569	0.000216574	1	NA	0.171096346	103
YGL250W	RMR1	chrVII	31910	32635	+	HH	274	28	726	31773	13477	45250	0	NO	TFIID	NA	NA	NA	-1.466403162	0.063563661	NA	NA	NA	NA	NA	NA	0.341260981	11	NA	NA	6.525558691	0.030493626	0.026760045	NA	NA	NA	Lethal	NA	0.99236	1.00709	NA	27	122	N	-41	2	0.00729927	5	25	106	66	65	175	-484	NA	NA	31910	0.79384	0.00862069	NA	NA	NA	6.81E-05	3	NA	0.142068966	103
YPR116W	RRG8	chrXVI	758648	759481	+	HT	520	9	834	15015	7146	22161	0	NO	TFIID	TATA-less	1	TAF1-enriched	-0.95862069	0.121860687	NA	NA	NA	NA	NA	NA	0.206367574	13	NA	NA	4.251722718	0.076218557	0.064932994	NA	NA	NA	Lethal	NA	0.71216	0.97913	NA	6	266.1	N	-76	4	0.007692308	4	129	19	57	77	170	-372	NO	OPN	188585	0.26944	0.011494253	NA	NA	NA	0.000528328	3	NA	0.12364946	103
YJL127C-B	YJL127C-B	chrX	181551	181709	-	HT	589	7	159	4503	1230	5733	NA	NA	NA	TATA-less	1	TAF1-enriched	NA	NA	NA	NA	NA	NA	NA	NA	NA	NA	NA	NA	8.361911472	0.022416349	0.017905105	NA	NA	NA	Lethal	NA	NA	NA	NA	46	112.2	N	-99	3	0.005093379	3	112	75	24	153	269	-327	YES	UNCLEAR	181551	NA	NA	0.000115279	2.53E-05	2.76E-05	NA	NA	NA	0.655063291	103.5
YBR291C	CTP1	chrII	783673	784572	-	HH	2434	38	900	47703	21670	69373	1	YES	TFIID	TATA-less	1	TAF1-enriched	-6.8	0.001409469	NA	NA	NA	NA	NA	NA	0.519683511	17	10.733	0	8.114647125	0.030012247	0.021349102	NA	NA	NA	Lethal	NA	0.99692	NA	NA	41	192.8	Y	-36	15	0.006162695	3	121	22	14	255	269	-97	YES	DPN	28612	0.60215	0.172413793	0.000464685	0.000117851	0.002817014	2.23E-05	2	NA	0.11512792	103.5
YJR152W	DAL5;UREP1	chrX	719666	721297	+	HT	2036	31	1632	39366	16559	55925	1	YES	SAGA	NA	NA	NA	NA	NA	G+E	40.52592	0	6.994266	2.968444	0.008544331	0.538930316	14	NA	NA	6.830745265	0.615182032	0.11482428	NA	NA	NA	Lethal	NA	1.00406	NA	NA	7	268.9	Y	NA	11	0.00540275	4	82	52	NA	NA	281	-294	YES	UNCLEAR	24454	2.3397	0.022988506	NA	NA	NA	NA	3	NA	0.063458001	103.5
YDR489W	SLD5	chrIV	1431012	1431896	+	HH	223	13	885	9537	2458	11995	0	NO	TFIID	TATA-less	1	TAF1-enriched	-3.125	0.004227773	G+E	40.52592	0	6.994266	2.968444	0.008544331	0.042838246	17	1.343	0.220676	6.13498619	0.020480222	0.023326723	NA	NA	NA	Essential	Essential	0	1.02531	NA	21	155.3	N	-9	0	0	4	34	268	43	259	302	-41	YES	DPN	100037	0.16452	0.048850575	8.12E-06	1.40E-05	2.43E-05	0.000219879	2	NA	0.117647059	104
YNL164C	IBD2	chrXIV	325265	326320	-	HT	421	30	1056	22353	7940	30293	0	NO	TFIID	TATA-less	2	TAF1-enriched	-0.462365591	0.381308307	G+E	40.52592	0	6.994266	2.968444	0.008544331	0.027349615	17	0.691	0.791933	6.188366237	0.015630708	0.020202881	NA	NA	NA	Lethal	NA	0	0.99261	NA	26	139.6	N	-165	2	0.004750594	4	78	95	70	227	297	-170	YES	UNCLEAR	325265	0.43668	0.063218391	7.47E-05	2.51E-05	4.96E-05	5.81E-06	3	NA	0.098578199	104
YJL147C	YJL147C;J0639	chrX	141419	142567	-	HH	725	17	1149	21633	7157	28790	0	NO	TFIID	TATA-less	1	TAF1-enriched	-0.409836066	0.303564333	G+E	40.52592	0	6.994266	2.968444	0.008544331	0.080568335	17	1.144	0.356142	5.825776468	0.005868395	0.013149397	NA	NA	NA	Lethal	NA	1.03188	0.99327	NA	13	302.8	N	-67	4	0.005517241	3	137	30	37	206	243	-105	YES	DPN	141419	0.20026	0.063218391	5.30E-05	3.52E-05	7.89E-05	2.65E-05	2	NA	0.090592334	104
YKL053C-A	MDM35	chrXI	339182	339442	-	HT	226	36	261	25449	10238	35687	0	NO	NA	TATA-less	2	TAF1-enriched	-16	0.018114496	NA	NA	NA	NA	NA	NA	0.248701232	17	2.9	0.003651	8.234476762	0.073927396	0.033019211	101	24.745	2.182	Lethal	NA	0.87298	1.01173	NA	69	201.6	N	-73	1	0.004424779	4	43	199	116	126	242	-32	YES	DPN	327374	NA	0.135057471	NA	NA	NA	0.000216841	NA	NA	0.4	104
YNL012W	SPO1	chrXIV	609686	611665	+	HT	233	38	1896	49140	23023	72163	0	NO	NA	NA	NA	NA	-1.153638814	0.037435069	NA	NA	NA	NA	NA	NA	0.468482052	17	3.818	0.002781	4.391118362	0.067790893	0.059293971	NA	NA	NA	Lethal	NA	1.01976	NA	NA	1	160.6	Y	NA	0	0	4	46	253	NA	NA	299	-29	YES	DPN	172668	0.49201	0.063218391	4.78E-05	9.96E-05	4.32E-05	0.000269702	3	NA	0.052804447	104.5
YPR082C	DIB1;CDH1;SNU16	chrXVI	704225	704656	-	HH	198	31	432	28716	7015	35731	0	NO	TFIID	TATA-less	1	TAF1-enriched	-10.33333333	0.016553899	NA	NA	NA	NA	NA	NA	0.051560285	17	1.237	0.285024	7.162591899	0.043362778	0.029072899	NA	NA	NA	Essential	Essential	0	NA	NA	83	346.7	N	-8	0	0	4	47	209	55	201	256	-28	YES	DPN	243410	0.15576	0.037356322	3.17E-05	1.19E-05	2.75E-05	0.000771839	1	NA	0.24361949	105
YPR006C	ICL2	chrXVI	567269	568996	-	HT	340	36	1728	40728	17119	57847	1	YES	TFIID	NA	NA	NA	-1.276061776	0.022598557	G+E	40.52592	0	6.994266	2.968444	0.008544331	0.971147315	15	NA	NA	4.766056246	0.179606765	0.088920558	NA	NA	NA	Lethal	NA	1.02081	NA	NA	1	289.2	Y	NA	1	0.002941176	4	43	145	NA	NA	247	-220	YES	UNCLEAR	379070	1.1495	0.08045977	4.44E-05	4.52E-05	2.51E-05	9.38E-05	3	NA	0.060799074	105
YDL232W	OST4	chrIV	38487	38597	+	HT	314	29	111	24306	8815	33121	0	NO	TFIID	TATA-less	1	TAF1-enriched	1	0.430457759	G+E	40.52592	0	6.994266	2.968444	0.008544331	0.017408635	17	1.135	0.35833	8.420294096	0.046067122	0.025489909	1881	11.975	-2.074	Lethal	NA	0	NA	NA	45	290	N	-19	1	0.003184713	4	25	245	44	226	270	-50	YES	DPN	38487	0.35963	0.114942529	5.63E-05	1.77E-05	5.14E-05	0.000726896	3	NA	0.959090909	105.5
YPL039W	YPL039W	chrXVI	479225	480175	+	HH	224	13	951	16020	6898	22918	0	NO	TFIID	TATA-less	1	TAF1-enriched	0.34219554	0.288033049	NA	NA	NA	NA	NA	NA	0.080205168	16	NA	NA	6.405447398	0.030606582	0.027312279	NA	NA	NA	Lethal	NA	1.01267	1.02288	NA	24	344.9	N	-57	1	0.004464286	4	197	10	47	200	247	-85	YES	DPN	467891	0.30089	0.057471264	0.000109604	4.36E-05	4.25E-05	8.16E-05	1	NA	0.111052632	105.5
YER153C	PET122	chrV	474041	474805	-	HH	215	25	765	26541	12988	39529	0	NO	TFIID	TATA-less	2	TAF1-enriched	0.755555556	0.017938878	NA	NA	NA	NA	NA	NA	0.188337204	17	1.55	0.126875	4.802456269	0.106590328	0.067982242	NA	NA	NA	Lethal	NA	0.8428	NA	115	NA	247.3	N	-7	0	0	4	44	245	51	238	289	-31	YES	DPN	102069	0.42501	0.057471264	NA	NA	NA	3.75E-05	1	NA	0.138089005	105.5
YHR191C	CTF8	chrVIII	486230	486631	-	HH	195	11	402	11313	11636	22949	0	NO	TFIID	NA	NA	NA	-0.495726496	0.509865963	NA	NA	NA	NA	NA	NA	0.235836805	14	NA	NA	6.177380448	0.035630133	0.030556554	NA	NA	NA	Lethal	NA	0.8342	NA	176	96	212.9	N	-30	0	0	4	20	204	50	174	224	-55	UNCLEAR	UNCLEAR	76012	0.34105	0.054597701	3.10E-05	9.91E-06	1.57E-05	NA	2	NA	0.264339152	106
YBL021C	HAP3	chrII	181660	182094	-	HH	307	17	435	14226	5866	20092	3	YES	TFIID	TATA-less	1	TAF1-enriched	-8.666666667	0.072545585	NA	NA	NA	NA	NA	NA	0.053133981	17	1.671	0.09394	6.630734115	0.019681328	0.02115756	54	NA	NA	Lethal	NA	0.99916	NA	237	40	225	N	-47	1	0.003257329	3	9	264	56	217	273	-66	YES	DPN	181660	0.294	0	5.81E-05	2.51E-05	3.07E-05	0.000143732	2	NA	0.244239631	106
YKL026C	GPX1	chrXI	389380	389883	-	HT	357	51	504	61212	36602	97814	3	YES	TFIID	NA	NA	NA	-3.666666667	0.003161927	NA	NA	NA	NA	NA	NA	0.063693296	14	NA	NA	5.329051724	0.051711603	0.042672105	NA	NA	NA	Lethal	NA	1.02373	NA	NA	10	301.3	Y	-123	1	0.00280112	4	27	135	150	12	228	-210	YES	UNCLEAR	276933	2.5088	0.063218391	4.23E-05	0.000161054	0.000119284	0.000769514	2	NA	0.210735586	106
YJR112W-A	YJR112W-A	chrX	637790	638168	+	HT	155	1	330	1101	1669	2770	NA	NA	NA	TATA-less	2	TAF1-enriched	NA	NA	NA	NA	NA	NA	NA	NA	NA	NA	NA	NA	6.269861008	0.019360414	0.022192151	NA	NA	NA	Lethal	NA	NA	NA	NA	28	284.1	N	-37	1	0.006451613	4	158	2	35	121	238	-233	YES	UNCLEAR	107583	NA	NA	2.18E-05	1.36E-05	1.19E-05	NA	NA	NA	0.281746032	106.5
YNL310C	ZIM17;FMP28;HEP1;TIM15	chrXIV	51907	52431	-	HH	231	48	525	53868	19993	73861	0	NO	TFIID	TATA-less	2	TAF1-enriched	-0.235294118	0.73443611	NA	NA	NA	NA	NA	NA	0.103956419	17	1.101	0.386046	6.910097561	0.030799005	0.025397102	142.5	19.82	-1.541	Essential	Essential	0	0.99299	NA	37	119.9	N	-32	0	0	4	21	232	53	200	253	-54	YES	DPN	51907	0.24571	0.028735632	1.27E-05	1.59E-05	3.30E-05	0.000709812	1	NA	0.203244275	106.5
YMR144W	YMR144W;YM9375.13	chrXIII	553362	554390	+	HT	459	76	1029	87165	52116	139281	0	NO	TFIID	TATA-less	1	TAF1-enriched	-1.463265306	0.029534504	NA	NA	NA	NA	NA	NA	0.023246674	17	1.039	0.443863	6.251226453	0.025319451	0.025454344	NA	NA	NA	Lethal	NA	1.00643	0.98261	NA	16	88.1	N	-108	2	0.004357298	4	78	91	17	333	350	-166	YES	UNCLEAR	370041	0.36092	0.086206897	0.001687351	0.001983442	0.01049303	0.002609688	1	NA	0.103599222	106.5
YBR270C	BIT2	chrII	742761	744398	-	HH	454	12	1638	9300	4636	13936	0	NO	TFIID	NA	NA	NA	-3.4933687	9.52E-06	NA	NA	NA	NA	NA	NA	0.228033493	16	NA	NA	5.470387184	0.01103954	0.019206906	NA	NA	NA	Lethal	NA	1.02898	0.99479	79	6	154	Y	-302	1	0.002202643	3	15	203	99	168	267	-278	YES	UNCLEAR	68786	0.35275	0.091954023	NA	NA	NA	9.79E-05	2	NA	0.065058033	106.5
YPL183W-A	RTC6;TAE4	chrXVI	199095	199376	+	HH	1307	40	282	38043	13885	51928	0	NO	NA	TATA-less	2	TAF1-enriched	-2.272727273	0.071286839	NA	NA	NA	NA	NA	NA	0.047532047	17	1.561	0.123165	7.654288157	0.024876287	0.020605728	182	23.9	3.82	Lethal	NA	0.7442	1.02363	102	75	133.3	N	-106	8	0.006120888	3	127	52	54	133	187	-127	NO	OPN	199095	NA	0.043103448	2.25E-05	3.51E-05	3.09E-05	0.000314307	NA	NA	0.380782918	107
YGR015C	YGR015C	chrVII	521090	522076	-	HH	185	19	987	16110	6241	22351	0	NO	TFIID	TATA-less	1	TAF1-enriched	-1.85	0.028060471	NA	NA	NA	NA	NA	NA	0.236344666	17	2.269	0.045046	5.911484281	0.016031421	0.021418521	NA	NA	NA	Lethal	NA	1.02125	0.97659	NA	10	115.8	N	-2	0	0	4	21	220	23	218	241	-54	YES	DPN	521090	0.18186	0.011494253	3.75E-05	0.000121894	0.000181913	7.12E-05	2	NA	0.10851927	107
YOR040W	GLO4;GER1	chrXV	407064	407921	+	HT	520	31	858	44943	17771	62714	0	NO	TFIID	NA	NA	NA	0.119148936	0.782961489	NA	NA	NA	NA	NA	NA	0.45832201	16	NA	NA	6.153308704	0.046687058	0.035114747	NA	NA	NA	Lethal	NA	1.00448	NA	57	4	392.6	Y	-29	3	0.005769231	5	74	38	103	9	219	-113	UNCLEAR	UNCLEAR	407064	0.47371	0.037356322	NA	NA	NA	9.24E-05	3	NA	0.124854142	107
YJR067C	YAE1	chrX	567019	567444	-	HH	199	10	426	9834	4329	14163	0	NO	TFIID	NA	NA	NA	-4.347222222	0.00397703	NA	NA	NA	NA	NA	NA	0.060592633	16	NA	NA	6.525667111	0.035547861	0.028892281	86.5	24.065	-0.311	Essential	Essential	0	NA	NA	26	217.9	N	-6	0	0	4	46	208	52	202	254	-29	YES	DPN	178307	0.3406	0.017241379	1.15E-05	1.81E-05	2.27E-05	0.000119883	2	NA	0.252941176	107.5
YOR068C	VAM10	chrXV	453869	454213	-	HT	1694	20	345	21936	8895	30831	0	NO	TFIID	NA	NA	NA	NA	NA	NA	NA	NA	NA	NA	NA	2.206643446	9	NA	NA	NA	NA	NA	NA	NA	NA	Lethal	NA	0.9736	0.97343	144	NA	274.8	N	NA	11	0.006493506	4	141	1	NA	NA	191	-387	NO	OPN	453869	0.24066	0.060344828	2.03E-05	4.47E-05	0.000135617	3.60E-05	3	NA	0.3125	107.5
YPR098C	YPR098C	chrXVI	728947	729528	-	HH	263	17	486	13842	8129	21971	0	NO	TFIID	TATA-less	1	TAF1-enriched	-2.571428571	0.086805971	G+E	40.52592	0	6.994266	2.968444	0.008544331	0.080323103	17	1.871	0.051456	7.386414948	0.038845885	0.026683255	NA	NA	NA	Lethal	NA	1.02477	1.03465	119	106	274.4	N	-19	0	0	4	30	296	49	277	326	-45	YES	DPN	218538	0.56901	0.040229885	4.16E-05	4.88E-05	0.000188382	0.000455109	2	NA	0.185025818	107.5
YLR453C	RIF2	chrXII	1041799	1042986	-	HH	1012	32	1188	37443	17445	54888	0	NO	TFIID	TATA-less	2	TAF1-enriched	-0.202614379	0.592364014	NA	NA	NA	NA	NA	NA	0.057519932	14	NA	NA	5.224775784	0.034075629	0.035330866	NA	NA	NA	Lethal	NA	1.02401	NA	NA	6	105.9	N	-50	4	0.003952569	3	0	0	50	228	308	-353	YES	UNCLEAR	35191	0.22018	0.022988506	NA	NA	NA	0.001849428	2	NA	0.090564448	107.5
YBL029W	YBL029W;YBL0422	chrII	166134	167264	+	HH	1362	55	1131	67761	27284	95045	1	YES	TFIID	TATA-containing	0	TAF1-depleted	-2.791208791	0.00126947	G+E	40.52592	0	6.994266	2.968444	0.008544331	0.151626335	17	4.143	0.000195	6.386162445	0.057255891	0.03746883	NA	NA	NA	Lethal	NA	1.00654	0.98262	NA	NA	202.4	N	NA	4	0.002936858	4	29	151	NA	NA	180	-46	NO	OPN	166134	0.64534	0.040229885	0.000115597	5.48E-05	3.35E-05	4.85E-05	2	NA	0.095575221	108
YIR018W	YAP5	chrIX	384609	385346	+	HH	490	39	738	31461	10668	42129	0	NO	TFIID	TATA-less	2	TAF1-enriched	-0.86328125	0.128260999	G+E	40.52592	0	6.994266	2.968444	0.008544331	0.808870726	12	NA	NA	6.770466775	0.017367416	0.019464757	NA	NA	NA	Lethal	NA	1.00994	NA	16	13	187.3	N	-9	2	0.004081633	4	25	127	34	118	279	-335	YES	UNCLEAR	54542	0.42858	0.123563218	NA	NA	NA	0.000112052	3	NA	0.146540027	108
YGL247W	BRR6	chrVII	36933	37526	+	HT	171	16	594	14103	5509	19612	0	NO	TFIID	TATA-less	2	TAF1-enriched	-2.311827957	0.021413885	G+E	40.52592	0	6.994266	2.968444	0.008544331	0.097600878	17	2.309	0.018867	5.760213707	0.020306471	0.0247388	NA	NA	NA	Essential	Essential	0	1.014	NA	13	117	N	-12	0	0	3	26	246	38	234	272	-49	YES	DPN	36933	0.35232	0.048850575	NA	NA	NA	2.03E-05	3	NA	0.182124789	108
YPL088W	YPL088W	chrXVI	381965	382993	+	HH	815	55	1029	57417	35057	92474	3	YES	NA	NA	NA	NA	-0.162732919	0.709650464	G+E	40.52592	0	6.994266	2.968444	0.008544331	0.251712658	17	3.436	0.00102	7.725023715	0.072347305	0.034818604	NA	NA	NA	Lethal	NA	1.0305	0.98342	NA	4	224	Y	-88	4	0.004907975	3	76	88	0	0	229	-163	YES	UNCLEAR	381965	0.96392	0.045977011	2.47E-05	2.21E-05	0.000130486	0.000147515	1	NA	0.105544747	108.5
YDR179W-A	YDR179W-A;YD9395.13	chrIV	819433	820824	+	HH	237	26	1392	30306	14725	45031	0	NO	TFIID	NA	NA	NA	-1.304878049	0.029166188	NA	NA	NA	NA	NA	NA	0.262946588	17	1.253	0.278662	5.886842216	0.030060527	0.029452075	NA	NA	NA	Lethal	NA	0.99507	0.99927	NA	43	167.4	N	-93	1	0.004219409	4	119	51	42	173	215	-126	UNCLEAR	UNCLEAR	711109	0.47386	0.020114943	1.54E-05	2.95E-05	7.26E-05	3.24E-05	3	NA	0.078360891	109
YDL154W	MSH5	chrIV	178334	181039	+	HT	278	30	2706	29871	13420	43291	0	NO	TFIID	NA	NA	NA	-0.722326454	0.016881897	NA	NA	NA	NA	NA	NA	0.176464686	17	1.024	0.464921	5.199548151	0.035325965	0.036147762	NA	NA	NA	Lethal	NA	1.02578	NA	NA	NA	233.9	Y	NA	1	0.003597122	4	37	200	NA	NA	237	-38	YES	DPN	178334	0.25102	0.037356322	NA	NA	NA	0.000228262	3	NA	0.040295749	109
YKL006C-A	SFT1	chrXI	430198	430632	-	HH	1274	42	294	40851	17561	58412	0	NO	TFIID	TATA-less	1	TAF1-enriched	1	0.364964902	G+E	40.52592	0	6.994266	2.968444	0.008544331	0.242153126	14	NA	NA	7.277003412	0.010518366	0.014093588	94.5	24.06	-0.277	Essential	Essential	0	NA	NA	128	313.6	N	-42	7	0.005494505	3	133	137	175	95	232	-345	YES	UNCLEAR	236184	0.29178	0.011494253	3.50E-05	1.25E-05	2.53E-05	NA	2	NA	0.252304147	109.5
YGL057C	GEP7	chrVII	394966	395829	-	HT	206	15	864	17958	6477	24435	0	NO	TFIID	TATA-less	1	TAF1-enriched	-0.710321865	0.143474036	NA	NA	NA	NA	NA	NA	0.085788708	17	2.145	0.031101	6.358789447	0.036482172	0.030037646	NA	NA	NA	Lethal	NA	1.00854	0.99943	NA	10	91.2	N	40	1	0.004854369	4	39	157	194	1	226	-232	YES	UNCLEAR	394966	0.17027	0.005747126	2.93E-05	2.32E-05	4.89E-06	7.43E-06	1	NA	0.126882966	109.5
YBR085W	AAC3	chrII	415983	416906	+	HH	722	30	924	32604	15073	47677	0	NO	SAGA	TATA-less	1	TAF1-depleted	-0.442307692	0.6738328	NA	NA	NA	NA	NA	NA	0.28470522	17	4.921	4.20E-05	4.850433894	0.387050091	0.128263474	NA	NA	NA	Lethal	NA	0	NA	NA	36	245	Y	-64	3	0.004155125	3	81	83	145	19	172	-158	NO	OPN	396278	0.6469	0.045977011	0.000329815	8.55E-05	9.67E-05	0.000522935	1	NA	0.118634886	109.5
YER053C-A	YER053C-A	chrV	260933	261046	-	HT	1006	20	114	20373	10066	30439	1	YES	NA	NA	NA	NA	NA	0.020059206	NA	NA	NA	NA	NA	NA	NA	1	NA	NA	8.457229189	0.363693046	0.071308188	404	33.49	16.117	Lethal	NA	NA	NA	NA	7	139.2	N	-278	2	0.001988072	2	123	68	53	912	157	-143	NO	OPN	260933	NA	NA	0.000224353	9.23E-05	2.92E-05	7.48E-05	NA	NA	0.969026549	109.5
YNL014W	HEF3;YEF3B;ZRG7	chrXIV	606319	609453	+	HT	708	35	3135	37800	22061	59861	1	YES	TFIID	TATA-less	2	TAF1-enriched	-3.296918768	4.13E-06	NA	NA	NA	NA	NA	NA	0.24508945	14	NA	NA	4.802518965	0.091960099	0.063143787	NA	NA	NA	Lethal	NA	1.01447	NA	NA	NA	157.1	Y	NA	3	0.004237288	2	123	60	NA	NA	160	-135	NO	OPN	174880	0.67253	0.002873563	0.000440779	0.000108983	0.000154057	4.53E-05	3	NA	0.034939375	109.5
YJR047C	ANB1;HYP1;TIF51B	chrX	524908	525381	-	HH	954	54	474	46134	20188	66322	3	YES	TFIID	TATA-less	1	TAF1-enriched	1	0.215579287	NA	NA	NA	NA	NA	NA	0.149571104	17	0.549	0.908065	5.660997904	0.392284531	0.110638836	151.5	27.72	5.87	Lethal	NA	1.05031	NA	NA	13	123.8	Y	-50	2	0.002096436	3	58	87	108	37	459	-162	YES	UNCLEAR	220370	0.38811	0.005747126	0.013440927	0.004690547	1.199622809	5.96E-05	1	NA	0.231501057	109.5
YDR076W	RAD55	chrIV	598468	599688	+	HT	386	29	1221	26829	13538	40367	0	NO	TFIID	TATA-less	1	TAF1-enriched	-0.157142857	0.679669716	NA	NA	NA	NA	NA	NA	0.168632018	13	NA	NA	5.482017659	0.055187805	0.04285299	NA	NA	NA	Lethal	NA	0.90889	NA	10	7	103.3	N	-38	2	0.005181347	4	146	21	17	235	252	-96	YES	DPN	598468	0.31895	0.060344828	NA	NA	NA	2.83E-05	1	NA	0.089754098	109.5
YIR014W	YIR014W	chrIX	381086	381814	+	HH	702	23	729	21612	7869	29481	0	NO	TFIID	TATA-less	1	TAF1-enriched	-2.587412587	0.003395392	NA	NA	NA	NA	NA	NA	0.389759283	16	NA	NA	6.172323865	0.022819836	0.024474146	NA	NA	NA	Lethal	NA	0.99908	0.99071	NA	1	141.4	N	-16	4	0.005698006	5	19	109	35	93	183	-348	NO	OPN	58074	0.73245	0.074712644	NA	NA	NA	NA	2	NA	0.150412088	109.5
YMR133W	REC114	chrXIII	536207	537609	+	HH	637	32	1287	29829	17035	46864	0	NO	TFIID	NA	NA	NA	-0.241987179	0.532605899	NA	NA	NA	NA	NA	NA	3.544906906	7	NA	NA	2.256142459	0.074013972	0.120584181	NA	NA	NA	Lethal	NA	0.99754	NA	NA	NA	106.2	N	NA	3	0.004709576	3	38	172	NA	NA	210	-37	UNCLEAR	UNCLEAR	386822	0.90049	0.014367816	NA	NA	NA	0.000382883	2	NA	0.07810271	109.5
YDR315C	IPK1;GSL1	chrIV	1092741	1093586	-	HH	177	21	846	23478	8326	31804	0	NO	TFIID	NA	NA	NA	-1.458333333	0.055435639	NA	NA	NA	NA	NA	NA	0.158886708	16	NA	NA	6.28356314	0.027138825	0.026217395	NA	NA	NA	Lethal	NA	1.02345	NA	179	4	125.4	N	-1	0	0	4	59	220	60	219	279	-16	YES	DPN	438347	0.19591	0.048850575	2.18E-05	1.67E-05	4.61E-05	5.83E-05	3	NA	0.130177515	110
YKL084W	HOT13	chrXI	280509	280859	+	HT	382	43	351	41601	16911	58512	0	NO	SAGA/TFIID	NA	NA	NA	-1.008928571	0.235289305	NA	NA	NA	NA	NA	NA	0.339378837	17	4.339	9.90E-05	6.601895896	0.055010773	0.035526727	NA	NA	NA	Lethal	NA	1.05078	1.0184	NA	11	289.8	N	-42	2	0.005235602	3	125	99	167	57	164	-296	NO	OPN	280509	0.23545	0.022988506	7.82E-05	2.61E-05	5.33E-05	0.001239991	1	NA	0.314285714	110
YPR005C	HAL1	chrXVI	565787	566671	-	HT	598	29	885	27930	12797	40727	0	NO	TFIID	NA	NA	NA	-0.901960784	0.322519587	NA	NA	NA	NA	NA	NA	0.560599913	16	NA	NA	6.121158738	0.040791829	0.032995366	NA	NA	NA	Lethal	NA	1.007	NA	NA	17	255.2	N	-253	3	0.005016722	3	111	56	3	281	284	-325	YES	UNCLEAR	381395	0.99021	0	7.65E-05	4.03E-05	0.000246268	1.87E-05	3	NA	0.124434389	110
YPL194W	DDC1	chrXVI	179277	181115	+	HT	256	18	1839	15675	6907	22582	0	NO	TFIID	TATA-less	2	TAF1-enriched	-1.723287671	0.000711775	NA	NA	NA	NA	NA	NA	0.399406389	16	NA	NA	5.361166157	0.011231937	0.019768243	NA	NA	NA	Lethal	NA	0.99286	NA	167	16	151.3	N	-25	2	0.0078125	3	164	39	189	14	216	-114	UNCLEAR	UNCLEAR	179277	0.26067	0.057471264	NA	NA	NA	4.30E-05	3	NA	0.059847661	110
YDL209C	CWC2;NTC40;SLC3	chrIV	86207	87226	-	HH	286	16	1020	14235	5679	19914	0	NO	TFIID	TATA-less	2	TAF1-enriched	-0.025974026	0.9497395	NA	NA	NA	NA	NA	NA	0.044944899	17	0.775	0.707344	6.007140368	0.0086258	0.015460798	NA	NA	NA	Essential	Essential	0	0.9998	NA	10	361.8	N	-22	1	0.003496503	4	5	135	27	113	172	-210	NO	OPN	86207	1.7735	0.083333333	1.84E-05	1.11E-05	1.68E-05	9.12E-07	2	NA	0.108439647	110.5
YPL152W	RRD2;NOH1;YPA2	chrXVI	265028	266104	+	HT	328	15	1077	17859	7336	25195	0	NO	TFIID	TATA-less	1	TAF1-enriched	-0.744107744	0.304657158	NA	NA	NA	NA	NA	NA	0.0778977	17	2.04	0.036078	6.729259516	0.013443329	0.017230034	NA	NA	NA	Lethal	NA	1.00279	NA	NA	17	186.8	Y	-80	3	0.009146341	4	146	6	74	87	161	-81	NO	OPN	265028	0.38516	0.094827586	4.05E-05	3.34E-05	0.000146417	0.00011113	2	NA	0.102695167	110.5
YMR065W	KAR5;FIG3	chrXIII	399702	401216	+	HT	243	18	1515	16047	7809	23856	1	YES	TFIID	TATA-less	2	TAF1-enriched	0.172932331	0.582408991	G+E	40.52592	0	6.994266	2.968444	0.008544331	0.094548077	13	NA	NA	5.238569115	0.024455314	0.029852035	NA	NA	NA	Lethal	NA	1.01632	NA	NA	NA	115.4	N	149	2	0.008230453	4	166	49	17	198	186	-309	NO	OPN	399702	0.17126	0.066091954	2.50E-05	4.96E-05	3.97E-05	0.001964824	3	NA	0.072985469	110.5
YPL036W	PMA2	chrXVI	482843	485686	+	HH	942	62	2844	63045	30289	93334	1	YES	SAGA/TFIID	NA	NA	NA	-3.560606061	0.000385276	G+E	40.52592	0	6.994266	2.968444	0.008544331	0.034285928	17	1.264	0.268913	5.828951076	0.177884252	0.072356632	NA	NA	NA	Lethal	NA	1.01545	NA	105	NA	188.1	Y	-571	5	0.005307856	4	58	121	323	13	336	-323	YES	UNCLEAR	462380	0.41521	0.117816092	0.000489291	5.54E-05	0.000170773	5.74E-05	2	NA	0.038867394	110.5
YLR246W	ERF2	chrXII	627118	628197	+	HH	188	18	1080	16257	9697	25954	0	NO	TFIID	NA	NA	NA	-1.564935065	0.024552431	G+E	40.52592	0	6.994266	2.968444	0.008544331	0.222843123	17	2.902	0.003862	6.726918943	0.014366527	0.01781803	NA	NA	NA	Lethal	NA	0.98399	NA	43	11	205	N	-1	0	0	4	32	206	33	205	238	-43	YES	DPN	449980	0.68711	0.068965517	1.76E-05	2.36E-05	6.58E-05	0.000178472	1	NA	0.102873031	111
YDR248C	YDR248C	chrIV	957758	958339	-	HT	342	17	582	21252	10214	31466	1	YES	TFIID	TATA-containing	0	TAF1-enriched	-7.555555556	0.002334359	G+E	40.52592	0	6.994266	2.968444	0.008544331	0.365788041	17	3.287	0.002051	7.756805347	0.031339106	0.022822352	NA	NA	NA	Lethal	NA	1.01312	1.02211	NA	62	125	N	-58	3	0.00877193	4	140	31	27	81	150	-352	NO	OPN	573594	0.46751	0.022988506	2.79E-05	2.71E-05	7.39E-05	0.001579502	2	NA	0.191049914	111
YOR134W	BAG7	chrXV	578564	579793	+	HT	938	33	1230	46224	18324	64548	0	NO	SAGA	NA	NA	NA	-0.326378539	0.421559693	NA	NA	NA	NA	NA	NA	0.764846033	16	NA	NA	3.320287515	0.197360951	0.133799633	NA	NA	NA	Lethal	NA	1.02407	NA	NA	NA	156.1	Y	-327	5	0.00533049	3	42	150	26	276	192	-33	NO	OPN	511498	1.8452	0.034482759	0.000105018	0.000152411	0.000122841	9.10E-05	2	NA	0.090317331	111
YJL062W-A	COA3;COX25;RRG10	chrX	316723	316980	+	HH	248	6	258	6960	4616	11576	0	NO	NA	NA	NA	NA	-4	0.326638802	NA	NA	NA	NA	NA	NA	1.689922617	17	3.302	0.001534	7.789738205	0.029270711	0.021963107	50	NA	NA	Lethal	NA	NA	NA	13	71	262.7	N	-23	1	0.004032258	4	184	4	19	255	274	-79	YES	DPN	316723	NA	NA	NA	NA	NA	6.22E-06	NA	NA	0.431906615	111
YER137C	YER137C	chrV	441373	441819	-	HH	7655	27	447	34080	11289	45369	0	NO	TFIID	TATA-less	1	TAF1-depleted	-1.185897436	0.164570306	NA	NA	NA	NA	NA	NA	0.147869901	14	NA	NA	6.518130759	0.042943981	0.031792749	NA	NA	NA	Lethal	NA	0.99824	0.98859	NA	22	116.6	N	-20	36	0.004702809	1	159	35	179	15	NA	NA	NA	NA	135055	0.45372	0.011494253	3.23E-05	7.01E-05	9.55E-05	5.66E-05	2	NA	0.25	111.5
YPR166C	MRP2	chrXVI	876282	876629	-	HT	218	13	348	14568	6565	21133	0	NO	TFIID	TATA-less	1	TAF1-enriched	1	0.331196238	NA	NA	NA	NA	NA	NA	0.060424066	17	1.732	0.076224	8.080233104	0.029129017	0.021122194	NA	NA	NA	Lethal	NA	0.74799	NA	NA	63	281.1	N	-60	0	0	4	47	234	107	174	281	-28	YES	DPN	71437	0.81825	0.00862069	0.00065849	0.00013323	0.000386688	0.000357014	2	NA	0.321325648	111.5
YOR295W	UAF30	chrXV	869208	869894	+	HT	257	19	687	14145	4703	18848	0	NO	TFIID	NA	NA	NA	-1.221884498	0.097213879	G+E	40.52592	0	6.994266	2.968444	0.008544331	0.135255885	17	1.58	0.124499	6.002579919	0.045481754	0.035528809	NA	NA	NA	Lethal	NA	0.71975	0.99545	NA	10	233.4	Y	-77	2	0.007782101	4	160	19	58	168	226	-94	YES	DPN	221397	0.39272	0.043103448	NA	NA	NA	5.69E-05	3	NA	0.162536443	111.5
YLR267W	BOP2	chrXII	678212	679924	+	HH	488	60	1713	63024	32046	95070	1	YES	TFIID	NA	NA	NA	-0.326923077	0.368199957	G+E	40.52592	0	6.994266	2.968444	0.008544331	0.787900278	10	NA	NA	4.473267748	0.312594622	0.124987292	NA	NA	NA	Lethal	NA	1.01753	NA	NA	5	118.9	N	NA	2	0.004098361	3	105	73	NA	NA	310	-335	YES	UNCLEAR	398253	1.7151	0.051724138	0.000138638	1.96E-05	9.03E-05	0.000142316	1	NA	0.065420561	112
YKL220C	FRE2	chrXI	9091	11226	-	HH	3259	43	2136	36798	15112	51910	2	YES	TFIID	NA	NA	NA	NA	NA	NA	NA	NA	NA	NA	NA	2.155744729	16	NA	NA	5.505964078	0.112534215	0.060926877	NA	NA	NA	Lethal	NA	1.02131	NA	NA	1	150.2	Y	NA	18	0.005523167	4	1	156	NA	NA	249	-339	YES	UNCLEAR	9091	0.4546	0.022988506	0.001473938	0.000481204	0.000599776	6.82E-05	3	NA	0.052459016	112
YPL241C	CIN2	chrXVI	95372	96258	-	HT	238	29	807	31038	8997	40035	0	NO	TFIID	TATA-less	2	TAF1-enriched	-0.274358974	0.57159888	NA	NA	NA	NA	NA	NA	0.063911364	17	1.545	0.134426	6.2384429	0.044890242	0.033962509	NA	NA	NA	Lethal	NA	0.97303	NA	100	10	178.8	N	-8	0	0	1	64	630	72	622	NA	NA	NA	NA	95372	0.47161	0.045977011	NA	NA	NA	0.000274129	1	NA	0.126410835	112
YDL105W	NSE4;QRI2	chrIV	272389	273597	+	HH	488	20	1209	17754	7015	24769	0	NO	TFIID	TATA-less	1	TAF1-enriched	-0.3578125	0.48689547	NA	NA	NA	NA	NA	NA	1.251730455	11	NA	NA	5.877871523	0.02724378	0.028081066	NA	NA	NA	Essential	Essential	0	NA	NA	14	126.8	N	-41	3	0.006147541	4	35	195	76	154	230	-40	YES	DPN	272389	0.21587	0	1.60E-05	5.88E-05	5.74E-05	1.44E-05	2	NA	0.093129139	112.5
YLR318W	EST2	chrXII	766542	769196	+	HH	184	25	2655	35871	13377	49248	3	YES	NA	TATA-less	1	TAF1-enriched	-0.48	0.208323693	NA	NA	NA	NA	NA	NA	0.27537091	15	NA	NA	4.97473956	0.013887505	0.023688729	NA	NA	NA	Lethal	NA	1.00054	NA	NA	NA	247	N	39	1	0.005434783	4	80	156	41	195	236	5	YES	DPN	308981	0.55077	0.106321839	NA	NA	NA	4.47E-05	3	NA	0.042388847	112.5
YPL051W	ARL3;ARP1	chrXVI	459963	460559	+	HT	285	48	597	39651	16974	56625	0	NO	TFIID	NA	NA	NA	-11	0.0005096	NA	NA	NA	NA	NA	NA	0.044610292	17	0.882	0.597466	6.324582431	0.022889498	0.023921383	NA	NA	NA	Lethal	NA	1.00825	NA	257	15	320.7	Y	-25	1	0.003508772	4	40	237	65	212	277	-35	YES	DPN	459963	0.46816	0	1.06E-05	8.02E-06	1.09E-05	5.31E-05	2	NA	0.189597315	113
YGR212W	SLI1	chrVII	917040	918446	+	HT	339	22	1407	19461	5791	25252	0	NO	TFIID	NA	NA	NA	-1.377600979	0.005286188	NA	NA	NA	NA	NA	NA	0.111100079	15	NA	NA	4.946609817	0.089026775	0.060318796	NA	NA	NA	Lethal	NA	1.02501	1.00735	NA	3	152.2	N	-4	2	0.005899705	3	17	174	21	170	191	-58	NO	OPN	172494	0.33209	0.043103448	1.11E-05	9.09E-06	8.18E-06	4.45E-05	1	NA	0.080369844	113
YPR068C	HOS1	chrXVI	682941	684353	-	HT	203	13	1413	11262	7380	18642	3	YES	TFIID	NA	NA	NA	-0.25	0.559483365	NA	NA	NA	NA	NA	NA	0.30161087	14	NA	NA	5.741330429	0.01573059	0.021845398	NA	NA	NA	Lethal	NA	1.00952	NA	51	14	318.9	Y	-50	2	0.009852217	4	244	25	25	146	199	-464	NA	NA	263713	0.21002	0.054597701	5.44E-06	1.32E-05	3.66E-06	4.36E-05	1	NA	0.080028329	113
YDR183W	PLP1	chrIV	829585	830277	+	HT	231	23	693	28530	10702	39232	0	NO	TFIID	NA	NA	NA	-0.225	0.684640914	NA	NA	NA	NA	NA	NA	0.052379306	17	0.705	0.77553	6.285234152	0.018365513	0.021561554	NA	NA	NA	Lethal	NA	1.01298	NA	NA	18	145.2	N	-55	1	0.004329004	5	15	115	70	60	176	-478	NA	NA	701656	0.61083	0.037356322	2.19E-05	3.26E-05	3.16E-05	2.53E-05	2	NA	0.163294798	113
YMR068W	AVO2	chrXIII	406304	407584	+	HH	731	15	1281	10977	3566	14543	0	NO	TFIID	NA	NA	NA	-0.65	0.245098323	NA	NA	NA	NA	NA	NA	0.823754316	17	5.112	6.70E-05	5.565482646	0.017151851	0.023531666	NA	NA	NA	Lethal	NA	0.99998	1.01531	76	6	111.4	N	-14	3	0.004103967	4	31	236	45	222	267	-44	YES	DPN	406304	0.63138	0.045977011	3.68E-05	3.45E-05	4.01E-05	0.001307804	1	NA	0.088671875	113.5
YKL070W	YKL070W;YKL343	chrXI	306211	306720	+	HT	327	35	510	36018	14239	50257	NA	NA	TFIID	NA	NA	NA	NA	NA	NA	NA	NA	NA	NA	NA	0.129744253	14	NA	NA	3.324206352	0.152888274	0.117624859	NA	NA	NA	Lethal	NA	1.00171	1.01323	NA	NA	257.8	N	NA	2	0.006116208	4	111	95	NA	NA	162	-289	NO	OPN	306211	0.20324	0.002873563	NA	NA	NA	3.34E-05	2	NA	0.222986248	113.5
YLR165C	PUS5	chrXII	494494	495258	-	HT	171	8	765	8637	5404	14041	0	NO	TFIID	TATA-less	1	TAF1-enriched	-1.031746032	0.140158441	NA	NA	NA	NA	NA	NA	0.388249893	17	3.084	0.005535	5.379415873	0.059153715	0.045212226	NA	NA	NA	Lethal	NA	1.00582	1.03074	65	4	209.5	N	-8	1	0.005847953	4	62	117	70	109	251	-192	YES	UNCLEAR	494494	0.34307	0.028735632	NA	NA	NA	0.000140768	1	NA	0.148560209	113.5
YKL187C	YKL187C	chrXI	89284	91536	-	HT	1208	0	2253	0	0	0	1	YES	TFIID	NA	NA	NA	-1.483282675	0.000701242	NA	NA	NA	NA	NA	NA	0.237651357	13	NA	NA	4.052496294	0.118376278	0.084900395	NA	NA	NA	Lethal	NA	1.02231	0.99917	NA	NA	159.9	Y	348	7	0.005794702	4	131	27	36	217	203	-388	NO	OPN	89284	2.8303	0.017241379	5.44E-06	7.05E-06	6.13E-06	5.20E-05	3	NA	0.05062167	114
YDL069C	CBS1	chrIV	333121	333810	-	HT	407	10	690	9885	2579	12464	0	NO	TFIID	NA	NA	NA	-0.25	0.627777061	G+E	40.52592	0	6.994266	2.968444	0.008544331	0.094174328	17	0.951	0.528299	5.981903976	0.029027531	0.028481681	NA	NA	NA	Lethal	NA	0.79231	NA	NA	9	115.5	N	168	3	0.007371007	5	57	87	51	111	171	-463	NA	NA	333121	0.21546	0	5.35E-05	4.89E-05	7.23E-05	6.92E-05	1	NA	0.165457184	114
YLR356W	ATG33	chrXII	840321	840914	+	HH	1068	74	594	64830	28181	93011	0	NO	TFIID	TATA-less	2	TAF1-enriched	-3.387755102	0.009821932	NA	NA	NA	NA	NA	NA	0.338402402	17	2.987	0.002168	6.83324294	0.067849822	0.038119526	NA	NA	NA	Lethal	NA	1.01244	1.02372	NA	61	43.6	N	-36	6	0.005617978	3	120	29	7	271	278	-104	YES	DPN	237263	1.2722	0.043103448	0.000157526	5.45E-05	0.00014168	0.001641521	1	NA	0.192242833	114
YKL003C	MRP17	chrXI	437097	437492	-	HH	286	37	396	32202	12179	44381	0	NO	TFIID	TATA-less	1	TAF1-enriched	-3.5	0.113778198	G+E	40.52592	0	6.994266	2.968444	0.008544331	0.134156536	17	3.158	0.001352	7.477793928	0.030315496	0.023284067	NA	NA	NA	Lethal	NA	0.67813	NA	NA	53	394.8	N	7	2	0.006993007	5	95	66	88	73	198	-290	NO	OPN	229324	0.70003	0.005747126	1.90E-05	1.01E-05	4.53E-05	2.30E-05	3	NA	0.289873418	114.5
YNR020C	ATP23	chrXIV	667410	668222	-	HH	155	21	813	19338	11062	30400	0	NO	TFIID	TATA-less	1	TAF1-enriched	0	1	NA	NA	NA	NA	NA	NA	0.069658873	17	0.736	0.744279	6.74263104	0.02184164	0.021918621	NA	NA	NA	Lethal	NA	0.95146	1.01928	NA	NA	163.8	N	85	0	0	3	141	166	56	251	162	-241	NO	OPN	116111	0.27615	0.066091954	4.59E-05	1.47E-05	2.25E-05	0.000409697	2	NA	0.141009852	114.5
YGL162W	SUT1	chrVII	198138	199037	+	HH	1735	45	900	50901	28209	79110	1	YES	SAGA	TATA-containing	0	TAF1-depleted	-2.264705882	0.004894427	G+E	40.52592	0	6.994266	2.968444	0.008544331	0.556357739	16	NA	NA	4.162392594	0.177368221	0.101180044	NA	NA	NA	Lethal	NA	1.01148	NA	111	35	139.8	Y	-262	10	0.005763689	3	135	74	65	114	179	-272	NO	OPN	198138	0.26029	0.005747126	0.000135139	1.60E-05	5.63E-05	7.33E-05	1	NA	0.127363737	114.5
YDR263C	DIN7;DIN3	chrIV	994242	995534	-	HT	495	20	1293	20346	4820	25166	0	NO	SAGA/TFIID	NA	NA	NA	-0.027920228	0.933865583	NA	NA	NA	NA	NA	NA	0.150908804	16	NA	NA	5.393758268	0.038368351	0.036315756	NA	NA	NA	Lethal	NA	1.0117	NA	NA	5	146.9	Y	NA	3	0.006060606	4	76	100	NA	NA	178	-175	NO	OPN	536399	0.45109	0.014367816	3.88E-05	3.40E-05	8.82E-05	7.57E-05	3	NA	0.088622291	114.5
YOR077W	RTS2	chrXV	471899	472597	+	HH	279	25	699	25998	10401	36399	0	NO	TFIID	TATA-less	2	TAF1-enriched	-0.828571429	0.287099986	NA	NA	NA	NA	NA	NA	0.034552109	17	1.125	0.370679	5.224286475	0.038792433	0.037700449	NA	NA	NA	Essential	Essential	0	NA	NA	2	266	N	-38	1	0.003584229	4	15	135	53	97	164	-357	NO	OPN	471899	0.1469	0.034482759	0.000119658	0.000100747	0.000201516	2.37E-05	2	NA	0.164040115	114.5
YPL119C	DBP1	chrXVI	324411	326264	-	HH	364	20	1854	22800	9589	32389	0	NO	TFIID	NA	NA	NA	-2.703125	4.90E-05	NA	NA	NA	NA	NA	NA	0.238225455	11	NA	NA	5.06563716	0.048902008	0.043654525	NA	NA	NA	Lethal	NA	1.0009	NA	NA	1	235.9	Y	-85	2	0.005494505	3	144	28	57	232	289	-103	YES	DPN	324411	1.357	0.07183908	9.24E-05	0.000157368	0.000103623	0.000272531	2	NA	0.061791689	114.5
YGR075C	PRP38	chrVII	636147	636875	-	HT	229	20	729	12165	5144	17309	0	NO	TFIID	TATA-less	1	TAF1-enriched	-0.173333333	0.763475125	NA	NA	NA	NA	NA	NA	1.940131803	16	NA	NA	5.706058731	0.028676079	0.029677249	86	25.105	0.065	Essential	Essential	0	NA	NA	25	112.2	N	-40	1	0.004366812	4	29	223	69	183	252	-46	YES	DPN	454065	0.18274	0.16091954	9.46E-06	2.15E-05	1.13E-05	9.39E-05	1	NA	0.157967033	115
YOR003W	YSP3	chrXV	331455	332891	+	HT	404	20	1437	12033	10823	22856	0	NO	TFIID	NA	NA	NA	-0.322222222	0.472981605	G+E	40.52592	0	6.994266	2.968444	0.008544331	0.155158234	17	2	0.037339	5.58751795	0.030636157	0.031325515	NA	NA	NA	Lethal	NA	1.03627	NA	86	11	190.7	Y	NA	2	0.004950495	4	132	28	NA	NA	193	-103	NO	OPN	331455	0.82179	0.066091954	0.0001792	7.06E-05	0.000228049	8.81E-05	3	NA	0.080083565	115
YNL218W	MGS1	chrXIV	238238	240001	+	HH	575	21	1764	27459	10321	37780	0	NO	TFIID	TATA-less	2	TAF1-enriched	-1.15625	0.03055125	NA	NA	NA	NA	NA	NA	0.237252567	17	1.496	0.159749	5.549180479	0.024844292	0.028404324	NA	NA	NA	Lethal	NA	0	0.98162	NA	25	108.1	N	-11	2	0.003478261	3	21	221	32	210	242	-54	YES	DPN	238238	0.2883	0.040229885	2.77E-05	7.51E-06	5.93E-05	0.000350216	1	NA	0.06551333	115.5
YDR249C	YDR249C	chrIV	958681	959802	-	HH	812	19	1122	30987	12655	43642	0	NO	TFIID	TATA-less	1	TAF1-enriched	0.255797101	0.448935165	NA	NA	NA	NA	NA	NA	0.245586549	17	1.079	0.410769	5.902726927	0.028611634	0.028656203	NA	NA	NA	Lethal	NA	1.01362	1.00081	NA	9	120.7	N	-315	3	0.003694581	3	26	261	54	272	326	-336	YES	UNCLEAR	572131	0.15648	0.051724138	5.96E-05	2.45E-05	9.24E-05	3.51E-05	1	NA	0.103033006	115.5
YKL138C-A	HSK3	chrXI	184803	185012	-	HT	274	7	210	2901	1965	4866	NA	NA	NA	TATA-less	1	TAF1-enriched	-0.9	0.637879471	NA	NA	NA	NA	NA	NA	0.746531139	12	NA	NA	7.022247683	0.01426816	0.017010138	NA	NA	NA	Essential	Essential	NA	NA	NA	31	164.9	N	-22	1	0.003649635	4	18	209	40	187	227	-57	YES	DPN	184803	NA	NA	1.70E-05	2.61E-05	4.91E-05	0.000512879	NA	NA	0.552631579	115.5
YJL133C-A	YJL133C-A	chrX	159623	159847	-	HH	772	8	225	8682	2710	11392	NA	NA	NA	TATA-containing	0	TAF1-enriched	-2.833333333	0.355616318	NA	NA	NA	NA	NA	NA	NA	NA	NA	NA	9.593243412	0.042674636	0.021533739	NA	NA	NA	NA	NA	NA	NA	NA	NA	33.9	NA	-29	2	0.002590674	1	343	445	372	416	NA	NA	NA	NA	159623	NA	NA	0.00148878	0.000104698	7.12E-05	NA	NA	NA	0.515625	115.5
YML043C	RRN11	chrXIII	190244	191767	-	HH	1021	23	1524	21282	7378	28660	0	NO	TFIID	TATA-less	1	TAF1-enriched	-0.68128655	0.180825495	NA	NA	NA	NA	NA	NA	0.037857792	17	1.337	0.22222	5.574923805	0.037732717	0.034843366	NA	NA	NA	Essential	Essential	0	NA	NA	15	60	N	-162	6	0.005876592	5	74	107	55	134	189	-182	NO	OPN	190244	1.0756	0.074712644	0.000258793	0.000204738	0.000391404	9.49E-05	1	NA	0.075837163	115.5
YGL254W	FZF1;SUL1	chrVII	22304	23203	+	HT	196	70	900	77562	28798	106360	0	NO	TFIID	TATA-less	1	TAF1-enriched	-0.5	0.257115917	NA	NA	NA	NA	NA	NA	0.136376209	15	NA	NA	6.016934124	0.022408014	0.024878628	NA	NA	NA	Lethal	NA	1.03278	NA	NA	15	104.8	N	-9	1	0.005102041	4	23	172	32	163	210	-247	UNCLEAR	UNCLEAR	22304	0.23559	0.017241379	NA	NA	NA	8.88E-05	3	NA	0.128476085	115.5
YDR022C	ATG31;CIS1	chrIV	488072	488662	-	HH	846	15	591	17217	9256	26473	0	NO	TFIID	TATA-less	1	TAF1-enriched	-1.988461538	0.0149693	NA	NA	NA	NA	NA	NA	0.201049106	17	1.091	0.406731	6.606604894	0.046750798	0.032727752	NA	NA	NA	Lethal	NA	1.01321	NA	40	21	87	N	-28	3	0.003546099	3	431	95	459	67	242	-170	YES	UNCLEAR	488072	0.63856	0.040229885	5.57E-05	3.50E-05	8.40E-05	0.000213915	3	NA	0.196610169	116
YOR226C	ISU2;NUA2	chrXV	761614	762084	-	HH	741	94	471	99864	47624	147488	0	NO	SAGA	TATA-less	1	TAF1-depleted	-1.423076923	0.172527539	G+E	40.52592	0	6.994266	2.968444	0.008544331	0.88263475	17	4.331	0.000101	7.468371245	0.03427933	0.024790784	637	19.67	3.604	Lethal	NA	1.00617	NA	28	49	212.4	Y	-21	2	0.002699055	2	138	16	5	547	552	-91	YES	DPN	329207	0.831	0.022988506	6.67E-05	3.78E-05	5.09E-05	1.89E-05	2	NA	0.246808511	116
YPL153C	RAD53;MEC2;SAD1;SPK1	chrXVI	261727	264192	-	HH	410	74	2466	66381	36028	102409	0	NO	TFIID	TATA-containing	0	TAF1-enriched	-1.686909582	0.002554934	G+E	40.52592	0	6.994266	2.968444	0.008544331	0.057926212	15	NA	NA	5.479936692	0.012117608	0.020087824	NA	NA	NA	Essential	Essential	0	NA	NA	5	133.6	Y	-166	2	0.004878049	4	65	129	37	218	255	-204	YES	UNCLEAR	261727	0.40344	0.106321839	0.000116509	0.000288225	0.001987984	0.000135584	3	NA	0.047058824	116
YBL080C	PET112	chrII	73070	74695	-	HH	564	15	1626	18204	5458	23662	0	NO	TFIID	TATA-less	1	TAF1-enriched	-1.178733032	0.016012419	NA	NA	NA	NA	NA	NA	0.101801274	17	1.619	0.108047	5.805239098	0.028950636	0.029309536	NA	NA	NA	Lethal	NA	0.98726	NA	NA	21	231.6	N	-83	3	0.005319149	4	6	220	89	137	226	-69	YES	DPN	73070	0.21133	0.031609195	6.19E-06	6.33E-06	7.60E-05	0.000103463	1	NA	0.071692308	116.5
YOL026C	MIM1;TOM13	chrXV	274012	274353	-	HH	604	38	342	30885	12308	43193	0	NO	TFIID	TATA-less	2	TAF1-enriched	0.142857143	0.840195868	NA	NA	NA	NA	NA	NA	0.136597683	17	2.187	0.022116	7.077075518	0.026534217	0.023017031	NA	NA	NA	Essential	Essential	0	0.97249	NA	83	151.4	N	-11	3	0.004966887	3	204	213	215	202	241	-288	YES	UNCLEAR	274012	0.25227	0.117816092	6.80E-06	3.24E-06	8.84E-06	0.001911577	1	NA	0.343108504	117
YER007W	PAC2	chrV	164527	166083	+	HT	242	20	1557	17343	8041	25384	0	NO	TFIID	NA	NA	NA	-0.316111111	0.423993563	NA	NA	NA	NA	NA	NA	0.027994951	17	0.814	0.667405	5.244891226	0.024692992	0.029960591	NA	NA	NA	Lethal	NA	0.96801	NA	NA	30	128.4	N	-23	2	0.008264463	4	148	5	18	214	232	-80	YES	DPN	164527	0.21234	0.229885057	3.51E-05	2.21E-05	1.17E-05	0.000558253	3	NA	0.075192802	117
YCR083W	TRX3	chrIII	259578	259961	+	HT	309	19	384	25527	11066	36593	0	NO	TFIID	TATA-less	1	TAF1-enriched	-1.083333333	0.272487234	NA	NA	NA	NA	NA	NA	0.282894818	17	2.336	0.037049	7.543666237	0.030939134	0.023316943	NA	NA	NA	Lethal	NA	1.02868	NA	NA	7	113.4	Y	-35	2	0.006472492	4	160	2	33	181	214	-77	UNCLEAR	UNCLEAR	56659	0.38104	0.011494253	0.000171951	0.000177022	3.68E-05	8.92E-05	2	NA	0.305483029	117
YHR137W	ARO9	chrVIII	375709	377250	+	HH	609	101	1542	95703	41174	136877	1	YES	SAGA	TATA-containing	0	TAF1-enriched	-1.242424242	0.058924016	G+E	40.52592	0	6.994266	2.968444	0.008544331	1.223233046	17	4.884	2.20E-05	6.834305231	0.113986479	0.049400608	222	38.325	18.888	Lethal	NA	0.99298	NA	NA	69	171.7	Y	-30	2	0.003284072	2	173	11	19	445	464	-86	YES	DPN	185393	2.3349	0.054597701	0.000327829	0.000218257	0.000597394	0.001929042	2	NA	0.075924724	117
YOL146W	PSF3	chrXV	48864	49448	+	HH	221	24	585	24087	12253	36340	0	NO	TFIID	TATA-less	2	TAF1-enriched	-1.4	0.245040534	NA	NA	NA	NA	NA	NA	0.167588275	17	4.351	9.60E-05	6.599658195	0.032869027	0.027470843	NA	NA	NA	Essential	Essential	0	1.00941	NA	7	196.8	N	-13	1	0.004524887	4	43	218	56	205	261	-32	YES	DPN	48864	0.1525	0.083333333	2.41E-05	4.37E-06	4.28E-05	4.55E-05	3	NA	0.20119863	117.5
YBR111W-A	SUS1	chrII	462139	462579	+	HH	266	0	291	0	0	0	NA	NA	NA	TATA-less	1	TAF1-enriched	1	0.299886564	NA	NA	NA	NA	NA	NA	NA	NA	NA	NA	7.086620675	0.016196805	0.017958725	NA	NA	NA	Lethal	NA	NA	NA	312	19	224.1	N	-1	0	0	2	20	594	21	593	614	-55	YES	DPN	350605	NA	NA	4.67E-05	2.05E-05	4.41E-05	NA	NA	NA	0.267045455	117.5
YML129C	COX14	chrXIII	14541	14753	-	HT	382	20	213	20547	12719	33266	0	NO	TFIID	TATA-less	1	TAF1-enriched	NA	0.014394083	NA	NA	NA	NA	NA	NA	0.132977234	17	1.393	0.19163	8.280858748	0.028352283	0.020333804	138	23.105	1.546	Lethal	NA	0.84957	NA	51	72	116.4	N	-10	1	0.002617801	4	36	230	46	220	266	-39	YES	DPN	14541	0.32295	0.07183908	8.56E-06	2.46E-05	1.80E-05	0.000149648	3	NA	0.554245283	117.5
YDR223W	CRF1	chrIV	912099	913502	+	HT	798	28	1404	35898	11355	47253	0	NO	TFIID	NA	NA	NA	-0.159090909	0.640773075	G+E	40.52592	0	6.994266	2.968444	0.008544331	0.21301572	12	NA	NA	4.845195876	0.169755842	0.085035648	NA	NA	NA	Lethal	NA	1.02024	1.04597	18	2	127.6	N	-446	5	0.006265664	4	125	52	15	140	215	-127	UNCLEAR	UNCLEAR	618431	1.052	0.063218391	0.000178324	6.84E-05	0.000193597	0.000367927	2	NA	0.083749109	117.5
YKL068W-A	YKL068W-A	chrXI	309206	309442	+	HT	1379	3	237	4551	1666	6217	NA	NA	NA	TATA-less	1	TAF1-depleted	NA	NA	NA	NA	NA	NA	NA	NA	NA	NA	NA	NA	7.255086645	0.035153119	0.025842786	NA	NA	NA	Lethal	NA	NA	NA	NA	59	174.6	N	-45	7	0.005076142	4	96	44	1	138	173	-258	NO	OPN	309206	NA	NA	NA	NA	NA	NA	NA	NA	0.497881356	117.5
YKL167C	MRP49	chrXI	133721	134134	-	HT	375	14	414	9546	10939	20485	0	NO	TFIID	TATA-less	2	TAF1-enriched	-2.111111111	0.070420771	NA	NA	NA	NA	NA	NA	0.143321384	17	4.431	0.000103	7.52342357	0.028537423	0.022453904	229.5	20.08	0.751	Lethal	NA	0.99554	NA	5	59	177.7	N	6	2	0.005333333	5	37	99	31	105	167	-174	NO	OPN	133721	0.21497	0.020114943	1.26E-05	1.09E-05	2.38E-05	0.000204918	3	1	0.285714286	118
YMR023C	MSS1;PET53	chrXIII	319437	321017	-	HH	858	114	1581	129648	64712	194360	0	NO	TFIID	NA	NA	NA	-1.255639098	0.015918009	NA	NA	NA	NA	NA	NA	0.283731382	14	NA	NA	5.876836544	0.031446964	0.030174894	NA	NA	NA	Lethal	NA	1.00601	NA	269	16	108.2	N	-212	5	0.005827506	4	12	96	116	127	243	-171	YES	UNCLEAR	319437	0.24558	0.037356322	4.25E-05	2.87E-05	2.72E-05	0.001167309	3	NA	0.074683544	118
YER071C	TDA2	chrV	301947	302327	-	HH	479	13	381	15570	3798	19368	0	NO	TFIID	TATA-less	2	TAF1-enriched	-0.925925926	0.377135199	NA	NA	NA	NA	NA	NA	0.02414676	17	1.392	0.192268	6.891646706	0.039351099	0.028784284	NA	NA	NA	Lethal	NA	1.01309	0.98233	NA	48	207.3	N	6	3	0.006263048	5	44	148	38	154	192	-31	NO	OPN	274547	0.27373	0.083333333	5.64E-05	4.13E-05	2.21E-05	0.000707658	2	NA	0.310526316	118
YGL154C	LYS5	chrVII	215278	216096	-	HH	177	21	819	19749	6137	25886	0	NO	TFIID	TATA-less	1	TAF1-enriched	-1.181818182	0.078363265	NA	NA	NA	NA	NA	NA	0.080134418	17	0.831	0.647433	6.158464126	0.042918179	0.033639399	NA	NA	NA	Lethal	NA	1.00958	NA	NA	9	135.8	N	-4	0	0	4	51	213	55	209	264	-24	YES	DPN	215278	0.17906	0.005747126	0.000170989	6.74E-05	0.000100851	6.64E-05	3	NA	0.144254279	118
YKL061W	BLI1	chrXI	325771	326112	+	HT	651	27	342	29049	11330	40379	0	NO	TFIID	TATA-less	2	TAF1-enriched	-3.285714286	0.065754074	NA	NA	NA	NA	NA	NA	0.191844479	17	8.113	0	6.664124226	0.039199415	0.029709594	87	26.24	0.778	Lethal	NA	1.02199	1.02293	26	19	226	N	-20	3	0.004608295	4	5	316	25	296	321	-70	YES	DPN	325771	0.24179	0.034482759	4.32E-05	7.30E-05	4.03E-05	4.40E-05	2	NA	0.346041056	118
YJL206C	YJL206C;J0316	chrX	47659	49935	-	HT	204	18	2277	27282	9076	36358	0	NO	TFIID	NA	NA	NA	-1.929391504	0.000556916	NA	NA	NA	NA	NA	NA	0.724861403	13	NA	NA	5.403361806	0.008244012	0.016803713	NA	NA	NA	Lethal	NA	1.04332	1.0261	48	6	225.2	Y	-5	1	0.004901961	4	54	134	59	129	188	-21	NO	OPN	47659	0.29755	0.034482759	5.70E-05	8.30E-05	2.49E-05	2.61E-06	2	NA	0.051845343	118
YPL017C	IRC15	chrXVI	518734	520233	-	HH	781	71	1500	67626	26822	94448	0	NO	TFIID	NA	NA	NA	-0.742112483	0.064907288	G+E	40.52592	0	6.994266	2.968444	0.008544331	0.66763	5	NA	NA	4.825629426	0.156608901	0.082007629	NA	NA	NA	Lethal	NA	0.9332	1.03042	82	1	164.6	Y	9	3	0.003841229	3	49	119	40	128	168	-26	NO	OPN	427833	0.477	0.112068966	0.000123594	8.98E-05	0.000121243	0.000111965	1	NA	0.078719146	118
YDL059C	RAD59	chrIV	344237	344953	-	HH	712	27	717	28062	11246	39308	0	NO	TFIID	TATA-less	2	TAF1-enriched	-0.5	0.414953189	NA	NA	NA	NA	NA	NA	0.86155262	17	7.278	2.00E-06	6.873840054	0.038261958	0.028456676	NA	NA	NA	Lethal	NA	0.98423	NA	NA	NA	80	N	-113	4	0.005617978	4	92	68	45	187	232	-143	YES	DPN	344237	0.47978	0.037356322	0.000375133	0.000309044	0.0003099	3.17E-05	2	NA	0.164804469	118
YGL128C	CWC23	chrVII	269293	270144	-	HT	248	16	852	21858	8694	30552	0	NO	TFIID	NA	NA	NA	-0.333333333	0.458225093	G+E	40.52592	0	6.994266	2.968444	0.008544331	0.726154298	16	NA	NA	5.372509024	0.023158098	0.028325285	NA	NA	NA	Essential	Essential	0	1.01446	NA	15	126.7	N	-16	1	0.004032258	4	23	152	39	136	175	-52	NO	OPN	269293	0.17015	0.074712644	NA	NA	NA	0.000112752	3	NA	0.1386604	118
YDR173C	ARG82;ARGR3;IPK2	chrIV	810565	811632	-	HH	478	19	1068	15267	5950	21217	0	NO	TFIID	TATA-less	1	TAF1-enriched	-1.593434343	0.041619375	G+E	40.52592	0	6.994266	2.968444	0.008544331	0.180052212	15	NA	NA	5.870743498	0.057797949	0.040950868	NA	NA	NA	Lethal	NA	0.78707	NA	NA	2	107.9	N	-45	1	0.00209205	2	3	205	48	160	208	-72	UNCLEAR	UNCLEAR	720301	0.29958	0.094827586	9.15E-05	4.72E-05	6.90E-05	0.000276095	1	NA	0.111059044	118.5
YBR022W	POA1	chrII	283738	284271	+	HT	394	9	534	14784	7057	21841	3	YES	TFIID	TATA-less	2	TAF1-depleted	-1.732919255	0.067642987	G+E	40.52592	0	6.994266	2.968444	0.008544331	0.052546759	17	1.475	0.156396	6.903959092	0.042305088	0.029791893	NA	NA	NA	Lethal	NA	1.0216	1.01475	NA	36	218.3	N	-62	2	0.005076142	4	45	107	107	45	171	-334	NO	OPN	283738	0.21801	0.08045977	3.47E-05	1.26E-05	2.15E-05	0.00039678	2	NA	0.22326454	119
YBR262C	AIM5;FMP51	chrII	735720	736040	-	HH	224	34	321	30687	15257	45944	0	NO	TFIID	TATA-containing	0	TAF1-enriched	0.123076923	0.871441372	NA	NA	NA	NA	NA	NA	0.124654424	17	1.207	0.304321	7.890504818	0.025288477	0.020153782	177.5	20.445	-0.168	Lethal	NA	1.00192	1.00954	NA	17	173.6	N	-35	1	0.004464286	5	28	109	63	74	203	-461	NA	NA	77144	0.21456	0.086206897	0.00014735	5.03E-05	4.19E-05	5.85E-05	1	NA	0.371875	119
YOL083W	ATG34;ATG19-B	chrXV	165714	166952	+	HT	383	47	1239	55266	39912	95178	0	NO	TFIID	NA	NA	NA	-1.85	0.001550488	G+E	40.52592	0	6.994266	2.968444	0.008544331	1.436452917	16	NA	NA	6.61180561	0.090780113	0.045569607	NA	NA	NA	Lethal	NA	1.01866	0.94493	NA	6	179.2	Y	-129	2	0.005221932	3	123	39	90	225	315	-114	YES	DPN	165714	2.6117	0.020114943	NA	NA	NA	NA	2	NA	0.096122779	119
YFR043C	IRC6	chrVI	239114	239827	-	HT	165	16	714	12762	4451	17213	0	NO	TFIID	NA	NA	NA	-2.461538462	0.005618653	NA	NA	NA	NA	NA	NA	0.110053311	17	2.159	0.027025	5.970658785	0.015558441	0.020891075	NA	NA	NA	Lethal	NA	1.00315	1.02005	NA	11	101.7	N	-27	0	0	5	15	173	42	146	188	-60	NO	OPN	30334	0.19187	0.054597701	9.21E-05	2.27E-05	3.95E-05	1.96E-05	2	NA	0.167601683	119.5
YDR451C	YHP1	chrIV	1361120	1362181	-	HH	697	38	1062	42258	21469	63727	1	YES	TFIID	TATA-containing	0	TAF1-depleted	-0.904761905	0.178813311	G+E	40.52592	0	6.994266	2.968444	0.008544331	0.206087616	17	2.232	0.020129	6.749956715	0.0360573	0.028131676	NA	NA	NA	Lethal	NA	0.96227	1.02176	NA	22	120	Y	-53	3	0.004304161	4	26	143	79	90	314	-218	YES	UNCLEAR	169752	0.39485	0.08908046	0.000729999	0.000349473	0.000429285	0.000213399	2	NA	0.112629595	119.5
YAL037C-A	YAL037C-A	chrI	73426	73518	-	HH	502	4	93	1008	570	1578	NA	NA	NA	NA	NA	NA	NA	NA	NA	NA	NA	NA	NA	NA	NA	NA	NA	NA	NA	NA	NA	NA	NA	NA	Lethal	NA	NA	NA	NA	1	61.8	N	NA	3	0.005976096	4	114	48	NA	NA	218	-395	UNCLEAR	UNCLEAR	73426	NA	NA	NA	NA	NA	NA	NA	NA	1.298913043	119.5
YCR015C	YCR015C;YCR15C	chrIII	141217	142170	-	HH	1464	11	954	14475	5975	20450	0	NO	TFIID	TATA-less	1	TAF1-enriched	-1.609808102	0.036114433	G+E	40.52592	0	6.994266	2.968444	0.008544331	0.635951156	14	NA	NA	6.075886079	0.027061827	0.027075029	NA	NA	NA	Lethal	NA	1.02097	0.99481	NA	9	167.9	N	-24	7	0.004781421	3	225	9	15	135	206	-234	UNCLEAR	UNCLEAR	141217	0.19702	0.063218391	5.96E-05	4.73E-05	4.86E-05	1.58E-05	3	NA	0.125918153	120
YPR107C	YTH1	chrXVI	741438	742064	-	HH	390	20	627	21252	11375	32627	0	NO	NA	TATA-less	1	TAF1-enriched	-13	0.000465881	NA	NA	NA	NA	NA	NA	0.064802647	17	3.343	0.001014	6.594142299	0.012519587	0.016968235	51	NA	NA	Essential	Essential	0	NA	NA	10	261.4	N	-84	2	0.005128205	3	106	63	21	266	287	-138	YES	DPN	206002	0.29303	0.137931034	2.80E-05	1.26E-05	9.26E-06	2.40E-05	3	NA	0.192492013	120.5
YBR228W	SLX1	chrII	675313	676227	+	HH	179	11	915	13473	5147	18620	0	NO	TFIID	TATA-less	1	TAF1-enriched	-0.868778281	0.156437834	NA	NA	NA	NA	NA	NA	0.082217184	17	1.801	0.071462	6.004114098	0.015451817	0.02070336	NA	NA	NA	Lethal	NA	1.01344	1.0006	87	5	226.8	N	0	0	0	4	68	185	68	185	253	-7	YES	DPN	136957	0.13694	0.028735632	5.47E-05	1.87E-05	8.04E-05	3.94E-05	3	NA	0.131838074	120.5
YPL186C	UIP4	chrXVI	194512	195426	-	HT	524	35	915	30273	12630	42903	0	NO	SAGA	NA	NA	NA	0.161764706	0.621442005	G+E	40.52592	0	6.994266	2.968444	0.008544331	1.207521429	8	NA	NA	6.422146529	0.174443819	0.065035066	NA	NA	NA	Lethal	NA	1.00862	0.97517	NA	10	159.2	N	NA	2	0.003816794	3	2	152	NA	NA	258	-227	YES	UNCLEAR	194512	2.6682	0.00862069	6.33E-05	0.000194125	0.000358392	0.000452997	1	NA	0.131838074	120.5
YPL166W	ATG29	chrXVI	237338	237979	+	HH	231	21	642	31374	13654	45028	0	NO	SAGA	NA	NA	NA	-0.916666667	0.264798068	G+E	40.52592	0	6.994266	2.968444	0.008544331	0.786051667	16	NA	NA	5.659011429	0.044636441	0.037333973	NA	NA	NA	Lethal	NA	0.98839	0.99134	NA	5	170.7	N	-68	1	0.004329004	5	23	147	91	79	170	-52	NO	OPN	237338	1.1769	0.129310345	3.19E-05	6.11E-05	4.74E-05	7.57E-05	2	NA	0.188767551	121
YBL031W	SHE1	chrII	161699	162715	+	HT	370	10	1017	11061	4686	15747	1	YES	TFIID	TATA-less	1	TAF1-enriched	-2.641666667	0.001832147	NA	NA	NA	NA	NA	NA	0.117057703	17	1.986	0.044043	5.806502429	0.01424915	0.020557953	NA	NA	NA	Lethal	NA	0.97923	NA	75	11	14.7	N	-34	1	0.002702703	4	17	242	51	208	259	-58	YES	DPN	161699	0.22717	0.066091954	0.002309028	0.003899906	0.006461874	0.00017047	2	NA	0.119094488	121
YDR058C	TGL2	chrIV	567723	568703	-	HT	531	22	981	32235	10311	42546	0	NO	TFIID	NA	NA	NA	-5.267857143	0.001395965	NA	NA	NA	NA	NA	NA	0.081488253	17	0.764	0.715313	6.366170914	0.02656327	0.025601327	NA	NA	NA	Lethal	NA	1.01037	NA	NA	8	108.1	N	-39	3	0.005649718	4	9	109	48	70	171	-184	NO	OPN	567723	0.64513	0.08908046	NA	NA	NA	9.83E-05	2	NA	0.123469388	121
YHR061C	GIC1	chrVIII	221534	222478	-	HT	399	31	945	34137	14547	48684	0	NO	TFIID	NA	NA	NA	-3.39453125	0.00170542	NA	NA	NA	NA	NA	NA	0.060650201	14	NA	NA	5.912925981	0.068867131	0.044381661	73.5	NA	NA	Lethal	NA	0.99831	NA	NA	12	108.1	Y	-196	2	0.005012531	4	24	146	50	108	170	-51	NO	OPN	221534	0.30094	0.037356322	NA	NA	NA	0.000149894	3	NA	0.128177966	121
YHR177W	YHR177W	chrVIII	456591	457952	+	HT	1064	22	1362	25968	11381	37349	0	NO	TFIID	NA	NA	NA	-1.149870801	0.017817017	NA	NA	NA	NA	NA	NA	1.218780565	14	NA	NA	4.882923597	0.160290587	0.081992491	NA	NA	NA	Lethal	NA	1.02621	1.02625	NA	NA	97.3	Y	-78	5	0.004699248	4	149	46	32	222	254	-121	YES	DPN	104691	0.41828	0.045977011	NA	NA	NA	4.35E-05	2	NA	0.088905217	121
YOL110W	SHR5;ERF4	chrXV	109176	109889	+	HH	280	38	714	35748	14043	49791	3	YES	NA	TATA-less	2	TAF1-enriched	-1.505263158	0.065322023	NA	NA	NA	NA	NA	NA	0.192041582	17	2.682	0.005576	6.170895922	0.012774958	0.018316037	NA	NA	NA	Lethal	NA	1.02955	NA	NA	40	225.4	N	-2	1	0.003571429	4	745	8	747	6	272	-83	YES	DPN	109176	0.39868	0.08045977	NA	NA	NA	0.000250716	1	NA	0.16970547	121
YDL107W	MSS2	chrIV	268921	269976	+	HT	222	11	1056	17307	6238	23545	0	NO	SAGA	NA	NA	NA	-0.943319838	0.09680747	G+E	40.52592	0	6.994266	2.968444	0.008544331	0.178302078	17	2.754	0.006737	6.228833173	0.025877446	0.025825813	NA	NA	NA	Lethal	NA	0.83106	NA	151	5	136.9	N	-21	2	0.009009009	4	197	9	12	157	169	-84	NO	OPN	268921	0.33845	0.005747126	2.10E-05	8.05E-06	4.13E-05	3.80E-05	2	NA	0.115165877	121.5
YML036W	CGI121	chrXIII	205642	206293	+	HH	234	13	546	12570	3394	15964	0	NO	TFIID	TATA-less	2	TAF1-enriched	0.083333333	0.882837959	G+E	40.52592	0	6.994266	2.968444	0.008544331	0.050978358	17	1.39	0.195933	6.630337258	0.021713933	0.022224583	NA	NA	NA	Lethal	NA	0.69588	0.98251	NA	19	111.4	N	-31	1	0.004273504	4	4	232	35	201	236	-71	YES	DPN	205642	0.20124	0.043103448	0.000124719	8.77E-05	0.000105005	0.00089549	2	NA	0.186635945	121.5
YJL072C	PSF2	chrX	305221	305862	-	HH	270	9	642	6831	1999	8830	0	NO	TFIID	TATA-less	2	TAF1-enriched	-6	0.004427662	G+E	40.52592	0	6.994266	2.968444	0.008544331	0.044492635	17	1.37	0.205961	7.027432031	0.014185246	0.01694813	NA	NA	NA	Essential	Essential	0	0.97756	NA	49	255.9	N	-37	1	0.003703704	4	9	215	46	178	224	-66	UNCLEAR	UNCLEAR	305221	0.11669	0.037356322	0.000186469	0.000179917	0.00031884	8.97E-05	3	NA	0.189547582	121.5
YCR020W-B	HTL1;DRT1	chrIII	155320	155556	+	HH	224	23	237	23658	7649	31307	0	NO	NA	NA	NA	NA	0.636363636	0.17939837	NA	NA	NA	NA	NA	NA	0.078727157	17	1.414	0.180315	6.938204394	0.069746876	0.038064076	297.5	17.045	-1.162	Lethal	NA	0.84495	NA	NA	28	225.9	N	-10	0	0	3	8	263	18	253	271	-67	YES	DPN	155320	NA	0.183908046	0.000212609	0.001033947	0.000402075	0.000257787	NA	NA	0.514830508	121.5
YLR289W	GUF1	chrXII	715089	717026	+	HH	185	13	1938	15264	9218	24482	0	NO	TFIID	TATA-less	1	TAF1-enriched	-1.133333333	0.075828186	NA	NA	NA	NA	NA	NA	0.177105065	14	NA	NA	5.818776125	0.026240221	0.027838901	NA	NA	NA	Lethal	NA	0.99969	NA	NA	5	236.7	Y	-30	1	0.005405405	4	180	12	18	188	206	-87	UNCLEAR	UNCLEAR	361151	0.37856	0.114942529	1.94E-05	8.36E-06	3.95E-05	4.26E-05	2	NA	0.062983996	122
YMR257C	PET111	chrXIII	779629	782031	-	HT	589	32	2403	29088	18733	47821	0	NO	TFIID	TATA-less	2	TAF1-enriched	-1.482201835	0.00122268	NA	NA	NA	NA	NA	NA	0.111200458	17	1.956	0.050388	5.905458304	0.019764816	0.023806348	NA	NA	NA	Lethal	NA	0.81136	NA	NA	9	179.2	N	-388	4	0.006791171	4	190	18	67	45	164	-232	NO	OPN	142400	0.29333	0.07183908	6.21E-06	9.55E-06	1.72E-05	0.000922783	2	NA	0.050791007	122
YOL008W	COQ10	chrXV	310312	310935	+	HH	173	20	624	15519	18459	33978	0	NO	TFIID	NA	NA	NA	NA	NA	NA	NA	NA	NA	NA	NA	0.189672669	17	2.113	0.028815	6.35551541	0.0128022	0.017802932	NA	NA	NA	Lethal	NA	0.96692	0.98955	NA	24	132.5	N	-39	0	0	4	11	175	50	136	186	-64	NO	OPN	310312	0.29593	0.066091954	4.07E-05	5.13E-05	5.70E-05	0.000588264	3	NA	0.195826645	122
YPL099C	AIM43;FMP14	chrXVI	363520	364068	-	HT	318	16	549	19062	5643	24705	0	NO	TFIID	TATA-less	1	TAF1-enriched	-2.032258065	0.020185812	G+E	40.52592	0	6.994266	2.968444	0.008544331	0.110113249	17	1.619	0.105519	6.459353949	0.046048007	0.033221278	NA	NA	NA	Lethal	NA	1.00474	0.99283	NA	30	206.3	N	NA	2	0.006289308	4	179	11	NA	NA	180	-408	NA	NA	363520	0.20113	0.08045977	6.36E-05	2.70E-05	2.03E-05	6.42E-05	3	NA	0.223540146	122.5
YBL095W	YBL095W;YBL0835	chrII	43277	44089	+	HT	182	22	813	19551	7094	26645	0	NO	TFIID	TATA-less	1	TAF1-enriched	-1.068181818	0.183045723	G+E	40.52592	0	6.994266	2.968444	0.008544331	0.148007486	17	2.566	0.007673	6.975045059	0.017365707	0.018892926	NA	NA	NA	Lethal	NA	1.01682	1.00759	NA	12	190.9	N	NA	0	0	3	26	234	NA	NA	260	-49	YES	DPN	43277	0.3224	0.112068966	0.000174822	3.67E-05	0.000115531	0.053937965	1	NA	0.150862069	122.5
YDL238C	GUD1	chrIV	28985	30454	-	HH	203	26	1470	27972	10883	38855	1	YES	SAGA	NA	NA	NA	-0.704347826	0.086607634	G+E	40.52592	0	6.994266	2.968444	0.008544331	0.630648828	15	NA	NA	5.941237579	0.026852786	0.027581492	NA	NA	NA	Lethal	NA	1.04117	1.01771	NA	16	336.3	N	-28	0	0	4	23	222	51	194	245	-52	YES	DPN	28985	0.7254	0.07183908	0.000109015	4.41E-05	0.000135451	7.63E-05	1	NA	0.083390061	122.5
YJL132W	YJL132W;J0678	chrX	161914	164166	+	HT	351	21	2253	34224	13300	47524	0	NO	TFIID	NA	NA	NA	-1.223406956	0.000923303	NA	NA	NA	NA	NA	NA	1.075105699	15	NA	NA	5.081225143	0.079636678	0.055537731	NA	NA	NA	Lethal	NA	1.02902	1.00561	NA	12	335.2	N	NA	2	0.005698006	5	24	148	NA	NA	177	-333	NO	OPN	161914	1.1378	0.031609195	NA	NA	NA	NA	3	NA	0.054396092	122.5
YIL098C	FMC1	chrIX	179772	180239	-	HH	188	24	468	19188	9640	28828	0	NO	TFIID	NA	NA	NA	-0.971014493	0.186599028	NA	NA	NA	NA	NA	NA	0.107912675	17	1.46	0.168735	7.329817557	0.058824649	0.033089218	NA	NA	NA	Lethal	NA	1.0602	NA	NA	36	140.3	N	-6	0	0	4	30	210	36	204	240	-45	YES	DPN	179772	0.36299	0.00862069	1.67E-05	5.92E-06	1.50E-05	NA	1	NA	0.264453961	123.5
YHR109W	CTM1	chrVIII	330310	332067	+	HT	250	16	1758	15129	4561	19690	0	NO	TFIID	NA	NA	NA	-0.660683761	0.106769276	NA	NA	NA	NA	NA	NA	0.297759562	17	2.132	0.034583	5.858309124	0.021947229	0.025288179	NA	NA	NA	Lethal	NA	1.02114	NA	NA	18	106.8	N	-15	1	0.004	4	39	186	54	171	225	-36	YES	DPN	230576	0.18846	0.040229885	3.22E-05	2.08E-05	8.80E-06	2.18E-05	1	NA	0.070290268	123.5
YGL075C	MPS2;MMC1	chrVII	366925	368088	-	HH	665	23	1164	21777	8276	30053	0	NO	TFIID	TATA-less	1	TAF1-enriched	-0.816326531	0.126585527	NA	NA	NA	NA	NA	NA	0.517191967	14	NA	NA	5.50161484	0.017603894	0.024116495	119.5	23.82	0.615	Essential	Essential	0	NA	NA	5	125.1	N	-195	2	0.003007519	3	45	162	33	216	249	-237	YES	UNCLEAR	366925	0.25465	0.031609195	NA	NA	NA	6.45E-06	3	NA	0.106190886	123.5
YPL147W	PXA1;PAL1;PAT2;SSH2	chrXVI	273255	275867	+	HH	440	58	2613	52314	25910	78224	1	YES	TFIID	NA	NA	NA	-2.106060606	0.000900708	G+E	40.52592	0	6.994266	2.968444	0.008544331	0.263509875	14	NA	NA	4.681179634	0.009721273	0.021062323	NA	NA	NA	Lethal	NA	1.02762	NA	60	1	224.6	Y	NA	3	0.006818182	4	148	16	NA	NA	187	-249	NO	OPN	273255	1.9556	0.037356322	6.99E-05	2.82E-05	6.34E-05	2.21E-05	2	NA	0.047473201	124
YPR054W	SMK1	chrXVI	666280	667446	+	HH	306	42	1167	47133	20730	67863	0	NO	TFIID	NA	NA	NA	-1.666666667	0.031778757	NA	NA	NA	NA	NA	NA	0.686727668	7	NA	NA	3.675763065	0.112566838	0.091276236	NA	NA	NA	Lethal	NA	1.0355	NA	NA	3	335.5	Y	-70	1	0.003267974	3	17	300	87	230	317	-58	YES	DPN	280620	0.3094	0.025862069	0.000107847	3.57E-05	4.16E-05	1.90E-05	2	NA	0.106346484	124
YIL049W	DFG10	chrIX	260158	260919	+	HT	388	24	762	23748	8614	32362	0	NO	TFIID	TATA-containing	0	TAF1-enriched	-0.5	0.497565217	NA	NA	NA	NA	NA	NA	0.226816876	17	2.504	0.009931	5.815016786	0.02868963	0.029128056	NA	NA	NA	Lethal	NA	1.00938	NA	NA	5	141.5	N	-1	2	0.005154639	4	43	228	44	227	271	-32	YES	DPN	178969	0.4947	0.091954023	NA	NA	NA	0.000234996	1	NA	0.162943495	124
YPL024W	RMI1;NCE4	chrXVI	503517	504242	+	HH	1334	42	726	41499	18036	59535	0	NO	SAGA	TATA-less	2	TAF1-enriched	-1.095238095	0.141269735	NA	NA	NA	NA	NA	NA	0.156204826	17	0.627	0.822375	7.413877373	0.050857334	0.030418052	NA	NA	NA	Lethal	NA	0	NA	NA	41	282.6	N	-186	4	0.002998501	3	15	144	42	85	159	-60	NO	OPN	443824	0.40034	0	8.93E-05	7.18E-05	4.66E-05	0.000237254	1	NA	0.171724138	124.5
YDL045W-A	MRP10	chrIV	372248	372535	+	HT	487	35	288	33822	15443	49265	0	NO	TFIID	TATA-containing	0	TAF1-enriched	-8.2	0.082119005	NA	NA	NA	NA	NA	NA	0.048126608	17	0.665	0.816037	7.622232669	0.068782746	0.034407851	NA	NA	NA	Lethal	NA	0	NA	NA	41	126	N	-44	4	0.008213552	4	148	11	33	119	152	-86	NO	OPN	372248	0.28775	0.014367816	6.21E-06	1.53E-05	2.15E-05	0.000120889	NA	NA	0.43554007	125
YMR048W	CSM3	chrXIII	366981	367934	+	HH	276	23	954	19938	4876	24814	0	NO	TFIID	TATA-less	2	TAF1-enriched	0.176651306	0.60412456	NA	NA	NA	NA	NA	NA	0.04066324	15	NA	NA	6.546069471	0.010603898	0.015730849	234.5	NA	NA	Lethal	NA	0.98774	1.01232	76	16	132.2	N	-9	2	0.007246377	5	28	129	37	120	162	-342	NO	OPN	366981	0.22398	0.037356322	4.00E-05	3.38E-05	9.29E-05	0.001009001	3	NA	0.131164743	125
YKL069W	YKL069W;YKL340	chrXI	307285	307827	+	HT	565	46	543	37335	14146	51481	0	NO	TFIID	NA	NA	NA	NA	NA	NA	NA	NA	NA	NA	NA	0.107428201	17	4.685	3.50E-05	7.107485179	0.011890275	0.015341929	146.5	21.075	-0.303	Lethal	NA	1.02396	1.00743	NA	57	260.4	N	-8	3	0.005309735	4	3	138	11	130	175	-213	NO	OPN	307285	0.4145	0.020114943	NA	NA	NA	5.98E-06	2	NA	0.230627306	125
YMR035W	IMP2	chrXIII	341142	341675	+	HH	420	38	534	41253	15019	56272	0	NO	TFIID	TATA-less	2	TAF1-enriched	-1.775	0.119148826	NA	NA	NA	NA	NA	NA	0.267592955	16	NA	NA	5.872712528	0.030156516	0.029570035	NA	NA	NA	Lethal	NA	0.98558	NA	5	28	81.4	N	-16	2	0.004761905	4	26	86	42	70	187	-325	NO	OPN	341142	0.20859	0.057471264	6.01E-05	3.05E-05	8.63E-05	0.000147964	2	NA	0.235459662	125.5
YML108W	YML108W;YM8339.11	chrXIII	54793	55110	+	HT	325	40	318	40266	12472	52738	0	NO	TFIID	TATA-less	2	TAF1-enriched	-5.944444444	0.020682541	G+E	40.52592	0	6.994266	2.968444	0.008544331	0.060806473	17	1.125	0.365116	6.798402282	0.042905645	0.03046845	98.5	25.89	1.591	Lethal	NA	0.96603	0.99303	NA	39	110.3	N	-21	2	0.006153846	4	191	15	6	259	265	-90	YES	DPN	54793	0.43407	0.014367816	5.77E-05	6.39E-05	4.64E-05	0.000106046	3	NA	0.395899054	125.5
YJL058C	BIT61	chrX	326242	327873	-	HT	245	15	1632	12252	4735	16987	0	NO	TFIID	TATA-less	1	TAF1-enriched	-0.473684211	0.360167657	NA	NA	NA	NA	NA	NA	0.061707989	17	0.976	0.502445	5.062630942	0.028547427	0.03337392	NA	NA	NA	Lethal	NA	1.03921	0.98047	74	8	259.6	Y	-59	1	0.004081633	4	8	226	67	167	234	-67	YES	DPN	326242	0.092679	0.045977011	NA	NA	NA	2.36E-05	3	NA	0.076946658	125.5
YPR168W	NUT2;MED10	chrXVI	878076	878549	+	HH	444	20	474	20262	6243	26505	0	NO	TFIID	TATA-less	2	TAF1-enriched	-2	0.212559493	NA	NA	NA	NA	NA	NA	0.75619526	16	NA	NA	6.123620628	0.031846289	0.02914212	208	18.88	-0.809	Essential	Essential	0	NA	NA	6	151.1	N	-11	2	0.004504505	4	9	178	20	167	204	-253	NO	OPN	69517	0.35991	0.028735632	4.49E-05	4.83E-05	0.000168889	6.37E-05	2	NA	0.266384778	126
YKR091W	SRL3	chrXI	611525	612265	+	HT	459	34	741	42834	19147	61981	0	NO	SAGA	TATA-less	1	TAF1-depleted	-1.228571429	0.056998116	NA	NA	NA	NA	NA	NA	1.156300497	16	NA	NA	6.298873054	0.177957256	0.066972266	NA	NA	NA	Lethal	NA	1.00398	NA	NA	6	238.5	N	-34	3	0.006535948	3	102	95	136	61	230	-284	YES	UNCLEAR	54551	1.4591	0.120689655	0.000101336	7.66E-05	0.000319487	0.001765012	1	NA	0.17027027	126
YJL035C	TAD2	chrX	380249	381001	-	HH	326	18	753	26520	6966	33486	0	NO	TFIID	NA	NA	NA	-1.26984127	0.087229527	NA	NA	NA	NA	NA	NA	0.228340636	16	NA	NA	6.129803606	0.090137605	0.048978609	NA	NA	NA	Essential	Essential	0	NA	NA	26	359.5	N	-53	1	0.003067485	2	166	4	49	288	337	-79	YES	DPN	364750	0.34367	0.057471264	2.51E-05	8.72E-05	3.41E-05	1.38E-05	2	NA	0.167553191	126
YAL054C	ACS1	chrI	42881	45022	-	HH	877	41	2142	43557	18927	62484	1	YES	NA	NA	NA	NA	-4.518272425	0.000775872	NA	NA	NA	NA	NA	NA	0.141035806	17	2.334	0.015747	5.160590145	0.034037039	0.035750039	NA	NA	NA	Lethal	NA	1.02651	NA	NA	1	137.8	Y	NA	5	0.005701254	5	14	140	NA	NA	167	-370	NO	OPN	42881	1.4804	0.054597701	0.0001499	0.000104296	3.01E-05	7.58E-06	1	NA	0.058851004	126
YJR111C	YJR111C;J2009	chrX	635855	636706	-	HH	324	20	852	19125	6370	25495	0	NO	TFIID	NA	NA	NA	-4.342857143	0.001810106	NA	NA	NA	NA	NA	NA	0.119489394	17	3.295	0.001068	6.660823198	0.025991615	0.024204088	NA	NA	NA	Lethal	NA	1.00598	1.00658	NA	NA	22.1	N	-124	2	0.00617284	4	100	72	52	126	178	-147	NO	OPN	109045	0.44151	0.057471264	0.000257679	0.000196065	0.000179553	8.48E-05	1	NA	0.148061105	126
YCR027C	RHB1;RSG1	chrIII	167370	167999	-	HT	2887	14	630	17139	8261	25400	0	NO	TFIID	TATA-less	1	TAF1-depleted	-1.041666667	0.156472931	NA	NA	NA	NA	NA	NA	0.105862319	17	1.109	0.392098	6.745909657	0.012492483	0.016568526	80	23.525	-2.621	Lethal	NA	1.04098	NA	188	19	303.3	Y	-175	16	0.005542085	4	22	156	19	177	196	-231	NO	OPN	148621	0.20798	0.143678161	NA	NA	NA	3.59E-05	3	NA	0.200317965	126
YOR334W	MRS2	chrXV	944596	946008	+	HT	239	29	1413	34059	11494	45553	0	NO	TFIID	TATA-less	2	TAF1-depleted	-0.803542673	0.185111015	NA	NA	NA	NA	NA	NA	0.049932552	17	0.853	0.627088	5.649982952	0.019135286	0.024483322	NA	NA	NA	Lethal	NA	0.96309	NA	NA	23	171.3	Y	0	1	0.0041841	5	29	84	29	84	176	-328	NO	OPN	145283	0.30735	0.054597701	NA	NA	NA	3.11E-05	1	NA	0.089235127	126
YNR032C-A	HUB1	chrXIV	687243	687464	-	HH	171	27	222	24090	7134	31224	0	NO	NA	NA	NA	NA	NA	0.003036283	NA	NA	NA	NA	NA	NA	0.112158136	17	0.831	0.650356	7.705242227	0.023822078	0.020031041	NA	NA	NA	Lethal	NA	0.99786	NA	86	134	196.5	N	-4	0	0	4	11	188	15	184	218	-263	UNCLEAR	UNCLEAR	96869	NA	0.025862069	0.000143149	4.16E-05	2.39E-05	0.001374362	NA	NA	0.574660633	127
YMR041C	ARA2	chrXIII	350966	351973	-	HH	630	42	1008	46086	11609	57695	0	NO	TFIID	NA	NA	NA	-1.248868778	0.064580164	G+E	40.52592	0	6.994266	2.968444	0.008544331	0.334249454	17	8.17	0	6.746261765	0.191398346	0.064849391	NA	NA	NA	Lethal	NA	1.06482	0.97372	NA	27	70.6	N	-18	4	0.006349206	4	11	156	29	138	168	-365	NO	OPN	350966	0.80764	0.022988506	8.28E-05	5.21E-05	5.26E-05	0.00046019	1	NA	0.12611718	127
YER074W-A	YOS1	chrV	307653	308123	+	HT	457	13	258	12150	5349	17499	0	NO	NA	TATA-less	1	TAF1-enriched	1	0.583489215	NA	NA	NA	NA	NA	NA	0.639378125	8	NA	NA	7.384836588	0.011773699	0.014693173	NA	NA	NA	Essential	Essential	NA	NA	NA	66	220.6	N	0	3	0.006564551	5	1	145	1	145	146	-74	NO	OPN	268751	NA	NA	0.000237857	0.000154052	0.000309995	5.21E-05	NA	NA	0.270212766	127
YPR145C-A	YPR145C-A	chrXVI	824690	824926	-	HT	719	0	237	0	0	0	NA	NA	NA	NA	NA	NA	-0.555555556	0.506002723	NA	NA	NA	NA	NA	NA	NA	NA	NA	NA	5.341156422	0.481388367	0.129901001	NA	NA	NA	NA	NA	NA	NA	NA	NA	263.1	NA	NA	4	0.005563282	3	117	75	NA	NA	336	-150	YES	UNCLEAR	123140	NA	NA	NA	NA	NA	NA	NA	NA	0.538135593	127
YBR167C	POP7;RPP2	chrII	571468	571890	-	HH	481	35	423	29445	23131	52576	0	NO	TFIID	NA	NA	NA	-2.5	0.078040059	NA	NA	NA	NA	NA	NA	0.090025554	17	0.324	0.990718	6.657250394	0.016692532	0.019407349	NA	NA	NA	Essential	Essential	0	NA	NA	32	230.8	N	-36	3	0.006237006	4	166	11	25	134	239	-245	YES	UNCLEAR	241294	0.27094	0.031609195	8.93E-06	1.68E-05	7.80E-05	1.49E-06	3	NA	0.302132701	127.5
YMR158W	MRPS8	chrXIII	572248	572715	+	HH	204	26	468	36945	22025	58970	3	YES	TFIID	TATA-less	2	TAF1-enriched	0.275	0.779313044	G+E	40.52592	0	6.994266	2.968444	0.008544331	0.104517914	17	1.164	0.336424	7.482731681	0.067253702	0.034657555	NA	NA	NA	Lethal	NA	0.78069	1.00028	NA	46	73.5	N	-7	1	0.004901961	4	178	1	6	221	227	-76	YES	DPN	351716	0.25094	0.066091954	2.48E-05	4.06E-05	9.83E-05	0.001442996	3	NA	0.273019272	127.5
YCR076C	YCR076C;YCR76C	chrIII	249293	250045	-	HT	193	0	753	0	0	0	0	NO	TFIID	NA	NA	NA	-1.009615385	0.07054319	G+E	40.52592	0	6.994266	2.968444	0.008544331	0.369655032	17	3.917	0.00065	6.600504876	0.031808816	0.0270207	NA	NA	NA	Lethal	NA	1.01743	1.00688	NA	40	270.6	N	-1	1	0.005181347	4	47	150	48	149	197	-28	NO	OPN	66575	0.40354	0.189655172	2.89E-05	4.69E-05	2.26E-05	0.000195728	1	NA	0.169547872	127.5
YNL142W	MEP2;AMT2	chrXIV	357453	358952	+	HH	2411	39	1500	52209	16128	68337	2	YES	SAGA	TATA-less	2	TAF1-depleted	-2.40625	0.198786011	G+E	40.52592	0	6.994266	2.968444	0.008544331	0.270862091	16	NA	NA	9.386359012	0.087205193	0.031461108	NA	NA	NA	Lethal	NA	1.03088	NA	NA	4	173.1	Y	-272	8	0.003318125	4	67	91	181	10	276	-357	YES	UNCLEAR	357453	1.0834	0.020114943	0.001353198	9.10E-05	0.000480095	NA	1	NA	0.085056704	127.5
YGL032C	AGA2	chrVII	436570	436833	-	HT	634	120	264	120336	72053	192389	1	YES	NA	TATA-containing	0	TAF1-depleted	-0.909090909	0.335571606	NA	NA	NA	NA	NA	NA	0.171913761	13	NA	NA	7.353787416	0.872604201	0.12702745	NA	NA	NA	Lethal	NA	1.01903	NA	NA	7	92.8	N	-54	2	0.003154574	3	79	105	133	51	230	-180	YES	UNCLEAR	436570	0.69913	0	NA	NA	NA	0.002833147	2	NA	0.484790875	127.5
YGL249W	ZIP2	chrVII	33098	35212	+	HT	463	19	2115	12159	5377	17536	0	NO	TFIID	NA	NA	NA	-0.711607601	0.054406397	NA	NA	NA	NA	NA	NA	0.48273646	9	NA	NA	3.213395429	0.121049874	0.108272459	NA	NA	NA	Lethal	NA	1.00761	NA	NA	NA	120.3	N	NA	2	0.004319654	3	150	70	NA	NA	225	-145	YES	DPN	33098	0.26457	0.00862069	9.98E-05	3.05E-05	9.36E-05	2.51E-05	2	NA	0.060548723	128
YLR040C	YLR040C	chrXII	228908	229582	-	HT	384	84	675	88131	41399	129530	0	NO	TFIID	NA	NA	NA	-0.162123386	0.714496506	NA	NA	NA	NA	NA	NA	2.192413971	15	NA	NA	4.912602938	1.127681879	0.216163139	NA	NA	NA	Lethal	NA	1.01387	1.00036	NA	3	166.9	N	-133	2	0.005208333	4	42	118	15	179	194	-193	NO	OPN	228908	0.14201	0.048850575	NA	NA	NA	0.000142953	1	NA	0.189910979	128
YLR404W	FLD1	chrXII	928743	929600	+	HT	1124	13	858	13431	3111	16542	0	NO	TFIID	TATA-containing	0	TAF1-enriched	0.433333333	0.630559078	NA	NA	NA	NA	NA	NA	0.070985765	17	1.494	0.158512	6.357852713	0.012734955	0.017749586	NA	NA	NA	Lethal	NA	1.01018	1.00766	NA	11	284.2	N	-29	7	0.006227758	5	49	63	78	34	165	-283	NO	OPN	148577	0.16483	0.011494253	NA	NA	NA	5.43E-05	3	NA	0.149358226	128
YPR067W	ISA2	chrXVI	682220	682777	+	HT	108	21	558	17616	7652	25268	0	NO	TFIID	NA	NA	NA	-1.2	0.147733265	NA	NA	NA	NA	NA	NA	0.055551924	17	0.769	0.71455	6.97832968	0.013672545	0.01675611	59	NA	NA	Lethal	NA	0.74666	NA	NA	45	345.4	N	-46	1	0.009259259	4	135	7	39	258	297	-82	YES	DPN	265289	0.35377	0.051724138	NA	NA	NA	1.10E-05	2	NA	0.229802513	128
YDR506C	GMC1	chrIV	1459728	1461554	-	HT	804	16	1827	22791	9591	32382	0	NO	TFIID	TATA-less	2	TAF1-enriched	-0.045712484	0.880361057	NA	NA	NA	NA	NA	NA	1.048200569	15	NA	NA	5.143571272	0.012588721	0.021813534	NA	NA	NA	Lethal	NA	1.01201	1.05453	NA	16	74.5	Y	-18	4	0.004975124	3	38	122	56	104	292	-197	YES	UNCLEAR	70379	0.35952	0.057471264	2.70E-05	9.77E-06	6.30E-06	0.000145661	3	NA	0.070372399	128.5
YKR037C	SPC34	chrXI	510910	511797	-	HT	202	17	888	14445	10609	25054	1	YES	TFIID	TATA-less	2	TAF1-enriched	0.239766082	0.733665651	NA	NA	NA	NA	NA	NA	0.02868271	17	1.129	0.364809	6.591763412	0.006641783	0.01236348	54	NA	NA	Essential	Essential	0	NA	NA	16	234	N	-9	1	0.004950495	4	13	155	22	146	171	-395	NO	OPN	155019	0.15194	0.031609195	2.08E-05	4.23E-05	3.92E-05	2.82E-05	2	NA	0.144870349	128.5
YLR323C	CWC24	chrXII	778173	778952	-	HH	263	9	780	13410	5784	19194	0	NO	TFIID	TATA-less	2	TAF1-enriched	0.263157895	0.543902344	NA	NA	NA	NA	NA	NA	0.079905206	17	1.182	0.327755	5.794718352	0.082481513	0.049561675	NA	NA	NA	Essential	Essential	0	1.03695	NA	18	233.8	N	-27	1	0.003802281	4	28	253	55	226	281	-47	YES	DPN	299225	0.22899	0.063218391	3.69E-05	4.49E-05	2.54E-05	0.00030428	1	NA	0.164955071	128.5
YIR019C	MUC1;FLO11;MAL5;S1;S2	chrIX	389572	393675	-	HH	3619	71	4104	70482	32067	102549	2	YES	NA	NA	NA	NA	NA	NA	NA	NA	NA	NA	NA	NA	5.938964835	14	NA	NA	6.161582927	1.329313647	0.187120528	NA	NA	NA	Lethal	NA	1.01267	NA	60	NA	149.4	Y	NA	21	0.005802708	5	83	138	NA	NA	221	8	UNCLEAR	UNCLEAR	46213	0.43512	0.08045977	4.87E-05	5.83E-05	9.45E-05	6.25E-05	2	NA	0.031318547	128.5
YER175C	TMT1;TAM1	chrV	539464	540363	-	HH	287	52	900	54315	16786	71101	3	YES	SAGA	NA	NA	NA	-2.096774194	0.015991937	G+E	40.52592	0	6.994266	2.968444	0.008544331	0.65724669	17	4.195	0.000325	7.758887327	0.103378229	0.041439556	NA	NA	NA	Lethal	NA	1.01613	1.0098	NA	31	178.7	Y	-19	2	0.006968641	4	155	18	1	180	202	-274	NO	OPN	36511	0.50275	0.051724138	0.000536269	0.000104393	8.62E-05	0.000526288	3	NA	0.142936596	128.5
YPR071W	YPR071W;YP9499.26	chrXVI	688172	688807	+	HT	574	23	636	32112	10089	42201	1	YES	TFIID	TATA-containing	0	TAF1-enriched	-0.582417582	0.68455026	NA	NA	NA	NA	NA	NA	0.063699564	17	2.203	0.021168	5.40866744	0.028214957	0.031056279	NA	NA	NA	Lethal	NA	1.03409	0.99365	NA	14	268.6	Y	-12	3	0.005226481	4	29	277	41	265	306	-46	YES	DPN	259259	0.5302	0.063218391	3.09E-05	2.37E-05	1.45E-05	8.05E-05	1	NA	0.203149606	129
YLR423C	ATG17;APG17	chrXII	971917	973170	-	HH	225	26	1254	32481	9412	41893	0	NO	TFIID	NA	NA	NA	-1.34375	0.037956539	G+E	40.52592	0	6.994266	2.968444	0.008544331	0.100238329	17	3.699	0.000598	5.679102429	0.020322906	0.025102282	NA	NA	NA	Lethal	NA	0.78231	NA	64	16	291.8	N	-19	1	0.004444444	4	184	21	203	2	223	-96	UNCLEAR	UNCLEAR	105007	0.38014	0.07183908	1.17E-05	3.77E-05	1.35E-05	1.05E-05	2	NA	0.102952913	129
YML054C	CYB2	chrXIII	165533	167308	-	HT	315	49	1776	54018	23867	77885	1	YES	TFIID	NA	NA	NA	0.037037037	0.933285508	G+E	40.52592	0	6.994266	2.968444	0.008544331	1.31791192	15	NA	NA	7.331528067	0.088377033	0.040548539	NA	NA	NA	Lethal	NA	1.03452	NA	NA	10	136.7	N	NA	2	0.006349206	5	15	142	NA	NA	170	-491	NA	NA	165533	2.8047	0.022988506	0.000305234	7.97E-05	0.000123163	0.000784797	1	NA	0.072676056	129
YBR297W	MAL33;MAL3R	chrII	800523	801929	+	HH	281	39	1407	37791	13345	51136	0	NO	NA	TATA-less	2	TAF1-enriched	NA	NA	NA	NA	NA	NA	NA	NA	2.406675385	15	NA	NA	6.136264115	0.118851225	0.056182077	NA	NA	NA	Lethal	NA	1.01561	NA	NA	55	220.2	Y	-39	1	0.003558719	3	155	14	25	292	317	-89	YES	DPN	11255	1.2327	0.181034483	0.000423618	0.000237498	0.000274324	6.08E-05	2	NA	0.091749644	129
YBR072W	HSP26	chrII	382030	382674	+	HT	984	81	645	81804	40010	121814	1	YES	SAGA	NA	NA	NA	-4.142857143	0.002989129	NA	NA	NA	NA	NA	NA	1.327817816	13	NA	NA	6.110264596	0.20427203	0.073968095	65	NA	NA	Lethal	NA	1.02035	NA	NA	10	194.7	N	-74	2	0.00203252	1	209	10	64	682	NA	NA	NA	NA	382030	5.8181	0.103448276	4.62E-05	0.003859668	0.001335917	0.00084069	1	NA	0.200310559	129
YDL139C	SCM3	chrIV	211375	212046	-	HH	1305	14	672	20403	6551	26954	0	NO	TFIID	TATA-less	1	TAF1-enriched	0.087301587	0.845702935	NA	NA	NA	NA	NA	NA	1.137468333	16	NA	NA	5.45333199	0.071537174	0.049046041	NA	NA	NA	Essential	Essential	0	NA	NA	4	337.9	N	-31	4	0.003065134	3	14	226	45	195	240	-61	YES	DPN	211375	0.25348	0.045977011	6.52E-05	1.25E-05	3.10E-05	0.000353562	1	NA	0.192995529	129.5
YOR064C	YNG1	chrXV	446079	446738	-	HH	701	27	660	25449	11541	36990	0	NO	TFIID	TATA-less	1	TAF1-enriched	-1.15	0.069327764	NA	NA	NA	NA	NA	NA	0.050816659	17	1.69	0.095314	6.538939823	0.030808536	0.026842823	NA	NA	NA	Lethal	NA	1.02547	NA	NA	25	284.5	N	7	3	0.004279601	3	0	0	145	7	258	-202	YES	UNCLEAR	446079	0.90392	0.051724138	2.68E-05	2.10E-05	5.03E-05	1.82E-05	1	NA	0.196509863	129.5
YIL007C	NAS2	chrIX	342994	343656	-	HH	406	13	663	17904	8242	26146	0	NO	TFIID	TATA-less	1	TAF1-enriched	-4.777777778	0.000606385	NA	NA	NA	NA	NA	NA	0.353062112	17	1.536	0.147008	6.279037456	0.016817393	0.020653148	NA	NA	NA	Lethal	NA	1.02536	0.96981	NA	19	177.6	N	-26	1	0.002463054	3	23	206	49	180	229	-52	YES	DPN	96232	0.28011	0.051724138	1.80E-05	2.23E-05	3.97E-05	0.000594998	3	NA	0.195619335	129.5
YOR265W	RBL2	chrXV	820454	820774	+	HT	296	46	321	49530	16565	66095	1	YES	TFIID	TATA-less	1	TAF1-enriched	-0.277777778	0.798503789	G+E	40.52592	0	6.994266	2.968444	0.008544331	0.048871973	17	1.063	0.422273	7.449111928	0.012635055	0.01508982	215.5	21.085	1.293	Lethal	NA	1.03496	NA	52	91	204.5	N	-34	2	0.006756757	3	138	10	24	230	254	-85	YES	DPN	270517	0.35258	0.017241379	0.000114849	4.04E-05	0.000148638	0.000971263	3	NA	0.4046875	129.5
YNL024C	YNL024C;N2809	chrXIV	587107	587847	-	HT	416	36	741	49005	17539	66544	0	NO	TFIID	TATA-less	1	TAF1-enriched	-0.022222222	0.976009198	G+E	40.52592	0	6.994266	2.968444	0.008544331	0.447496578	17	4.148	0.000409	4.135736459	0.105249784	0.078443642	NA	NA	NA	Lethal	NA	0.9598	1.00586	NA	17	102.2	N	-29	2	0.004807692	4	216	12	17	210	227	-87	YES	DPN	196486	0.92217	0.037356322	4.78E-05	7.25E-05	4.35E-06	8.76E-06	3	NA	0.175	129.5
YLR063W	YLR063W;L2174	chrXII	264157	265254	+	HT	209	20	1098	21621	8161	29782	0	NO	TFIID	TATA-less	1	TAF1-enriched	-1.28125	0.069082988	NA	NA	NA	NA	NA	NA	0.152063988	17	2.109	0.029088	5.693163903	0.037320224	0.033932701	84.5	22.535	-1.764	Lethal	NA	1.00168	0.99759	NA	NA	128.6	N	76	1	0.004784689	3	52	134	214	24	251	-209	YES	UNCLEAR	264157	0.92152	0.051724138	0.000109259	0.000106454	0.000184392	0.000247206	3	NA	0.118049225	129.5
YPR061C	JID1	chrXVI	675977	676882	-	HH	283	35	906	30531	14289	44820	0	NO	TFIID	TATA-less	1	TAF1-enriched	-3.806060606	0.003435005	NA	NA	NA	NA	NA	NA	0.108678573	14	NA	NA	5.667297307	0.09714278	0.054995768	NA	NA	NA	Lethal	NA	0.99184	1.00958	212	18	257.8	N	-47	1	0.003533569	3	144	27	20	256	276	-102	YES	DPN	271184	1.0855	0.048850575	0.000193636	0.000121528	8.69E-05	7.77E-06	1	NA	0.143093923	129.5
YKR101W	SIR1	chrXI	640540	642504	+	HH	572	24	1965	19308	9348	28656	0	NO	TFIID	NA	NA	NA	-0.949202454	0.012036062	NA	NA	NA	NA	NA	NA	0.260137518	14	NA	NA	5.75275641	0.009578122	0.017012346	NA	NA	NA	Lethal	NA	1.02785	NA	NA	11	232.8	N	-10	3	0.005244755	3	168	1	9	152	161	-76	NO	OPN	24312	0.36612	0.034482759	NA	NA	NA	5.82E-05	3	NA	0.065936864	129.5
YLR426W	TDA5	chrXII	987062	988113	+	HT	245	13	981	22206	6553	28759	0	NO	TFIID	TATA-less	1	TAF1-enriched	-0.628083491	0.274653096	NA	NA	NA	NA	NA	NA	0.068391617	17	2.226	0.022607	6.21454991	0.030482029	0.028093914	NA	NA	NA	Lethal	NA	0.94945	1.0148	NA	13	375.1	Y	-23	1	0.004081633	4	37	234	60	211	271	-38	YES	DPN	90064	0.29205	0.031609195	NA	NA	NA	0.000239226	3	NA	0.123215985	129.5
YPR134W	MSS18	chrXVI	798051	798857	+	HT	342	13	807	15336	4702	20038	0	NO	TFIID	NA	NA	NA	-0.202982601	0.612307998	NA	NA	NA	NA	NA	NA	0.293554626	17	6.248	1.00E-06	5.979568596	0.017774537	0.02229612	NA	NA	NA	Lethal	NA	1.01026	NA	74	19	255.1	N	-26	3	0.00877193	4	211	8	18	164	188	-401	NA	NA	149209	0.19815	0.051724138	NA	NA	NA	2.30E-05	3	NA	0.160669975	129.5
YNL063W	MTQ1	chrXIV	507758	508702	+	HH	661	12	945	15078	4926	20004	0	NO	TFIID	TATA-less	1	TAF1-enriched	0.113636364	0.764654321	NA	NA	NA	NA	NA	NA	0.031191722	17	0.544	0.909629	6.218539443	0.014275858	0.019213776	NA	NA	NA	Lethal	NA	1.02985	0.99712	NA	24	187.5	N	-156	3	0.004538578	4	36	113	43	104	149	-39	NO	OPN	275631	0.78042	0.037356322	0.000162931	5.33E-05	8.22E-05	4.29E-05	2	NA	0.137711864	130
YOR289W	YOR289W	chrXV	853357	854112	+	HH	280	42	756	54999	21384	76383	0	NO	TFIID	TATA-less	1	TAF1-enriched	-0.185344828	0.783092257	NA	NA	NA	NA	NA	NA	0.41638381	15	NA	NA	7.287343652	0.055027328	0.032189925	NA	NA	NA	Lethal	NA	1.0067	0.99136	NA	8	76.6	N	-1	0	0	4	55	284	56	283	339	-20	YES	DPN	237179	1.971	0.040229885	0.00016691	0.000148945	6.81E-05	0.005364642	2	NA	0.17218543	130
YMR042W	ARG80;ARGR1	chrXIII	352603	353136	+	HH	630	58	534	63591	25310	88901	0	NO	TFIID	TATA-less	2	TAF1-enriched	-0.92	0.234423866	NA	NA	NA	NA	NA	NA	0.235185817	12	NA	NA	5.797912753	0.046300874	0.037112732	NA	NA	NA	Lethal	NA	0.99475	NA	NA	35	86	Y	-7	4	0.006349206	4	965	28	972	21	168	-247	NO	OPN	352603	0.22937	0.031609195	NA	NA	NA	0.000308469	1	NA	0.243902439	130
YHR100C	GEP4	chrVIII	314116	314673	-	HT	201	15	558	10146	4151	14297	0	NO	TFIID	TATA-less	1	TAF1-enriched	-0.692307692	0.400606132	NA	NA	NA	NA	NA	NA	0.047773153	17	2.209	0.022179	6.815724096	0.029853005	0.025350237	NA	NA	NA	Lethal	NA	0.82696	0.98988	NA	14	119.2	N	-31	1	0.004975124	4	146	8	23	213	236	-83	YES	DPN	247970	0.2264	0.028735632	2.46E-05	3.21E-05	2.17E-05	NA	1	NA	0.234290844	130.5
YAR008W	SEN34	chrI	158966	159793	+	HH	347	18	828	20034	8309	28343	0	NO	TFIID	NA	NA	NA	-0.960784314	0.214344992	NA	NA	NA	NA	NA	NA	0.276221146	17	1.153	0.349215	6.499741658	0.024409954	0.024037394	NA	NA	NA	Essential	Essential	0	NA	NA	29	141.6	N	-98	2	0.005763689	3	113	57	41	220	261	-132	YES	DPN	70425	0.23243	0.083333333	0.000410774	0.001295705	0.00268455	1.78E-05	3	NA	0.157799274	130.5
YDL127W	PCL2;CLN4	chrIV	234927	235853	+	HT	1040	67	927	82533	38398	120931	1	YES	TFIID	TATA-containing	0	TAF1-depleted	-0.542857143	0.368655574	NA	NA	NA	NA	NA	NA	0.308678403	17	1.599	0.120228	5.976832212	0.03961123	0.03329953	NA	NA	NA	Lethal	NA	1.03083	NA	NA	8	294.1	Y	-71	3	0.002884615	1	119	146	190	75	NA	NA	NA	NA	234927	0.31564	0.022988506	NA	NA	NA	0.000156908	2	NA	0.140928726	130.5
YGL063W	PUS2	chrVII	383654	384766	+	HH	446	26	1113	26163	9655	35818	0	NO	SAGA/TFIID	TATA-less	2	TAF1-enriched	-1.107946027	0.050302522	NA	NA	NA	NA	NA	NA	0.657538954	13	NA	NA	5.08540296	0.053228793	0.045367823	NA	NA	NA	Lethal	NA	1.02508	NA	NA	60	110	Y	-228	1	0.002242152	3	15	149	79	250	329	-224	YES	UNCLEAR	383654	0.14872	0.057471264	NA	NA	NA	7.10E-05	1	NA	0.117356115	130.5
YBR037C	SCO1	chrII	310565	311452	-	HH	446	20	888	21126	10075	31201	0	NO	TFIID	TATA-less	1	TAF1-enriched	-1.372222222	0.133227353	NA	NA	NA	NA	NA	NA	0.234886175	17	1.245	0.288332	6.938330162	0.047768735	0.031500461	NA	NA	NA	Lethal	NA	0.90923	NA	154	16	157.5	Y	-41	2	0.004484305	4	27	219	68	178	246	-48	YES	DPN	310565	0.50853	0.08908046	4.65E-05	3.54E-05	4.17E-05	0.000299215	1	NA	0.147688839	131
[truncated: 1,863,657 more chars]
