# Supplementary material for: Mutational sources of trans-regulatory variation affecting gene expression in Saccharomyces cerevisiae
Source: eLife. 2021 Aug 31;10:e67806. doi: 10.7554/eLife.67806 (PMC8456550; doi:10.7554/eLife.67806)
Supplement: Supplementary file 12. [file elife-67806-supp12.bz2 › Input_Files/README.txt]

Supplementary File 11:

This archive file contains text files necessary to run the R scripts available in Supplementary Files 12, 16 and 17, as well as files generated using these scripts.
These data can be found in a more readable format in other Supplementary Files. In particular, source data displayed on the article's figures can be found in Supplementary File 20.
