# Supplementary material for: Mutational sources of trans-regulatory variation affecting gene expression in Saccharomyces cerevisiae
Source: eLife. 2021 Aug 31;10:e67806. doi: 10.7554/eLife.67806 (PMC8456550; doi:10.7554/eLife.67806)
Supplement: Supplementary file 12. [file elife-67806-supp12.bz2 › Input_Files/S288c.genome.truncated.bed]

CHR	POSITION	NUCLEOTIDE
chr01	1	C
chr01	2	C
chr01	3	A
chr01	4	C
chr01	5	A
chr01	6	C
chr01	7	C
chr01	8	A
chr01	9	C
chr01	10	A
chr01	11	C
chr01	12	C
chr01	13	C
chr01	14	A
chr01	15	C
chr01	16	A
chr01	17	C
chr01	18	A
chr01	19	C
chr01	20	C
chr01	21	C
chr01	22	A
chr01	23	C
chr01	24	A
chr01	25	C
chr01	26	A
chr01	27	C
chr01	28	C
chr01	29	A
chr01	30	C
chr01	31	A
chr01	32	C
chr01	33	C
chr01	34	A
chr01	35	C
chr01	36	A
chr01	37	C
chr01	38	A
chr01	39	C
chr01	40	C
chr01	41	A
chr01	42	C
chr01	43	A
chr01	44	C
chr01	45	C
chr01	46	A
chr01	47	C
chr01	48	A
chr01	49	C
chr01	50	C
chr01	51	C
chr01	52	A
chr01	53	C
chr01	54	A
chr01	55	C
chr01	56	A
chr01	57	C
chr01	58	A
chr01	59	C
chr01	60	A
chr01	61	C
chr01	62	A
chr01	63	T
chr01	64	C
chr01	65	C
chr01	66	T
chr01	67	A
chr01	68	A
chr01	69	C
chr01	70	A
chr01	71	C
chr01	72	T
chr01	73	A
chr01	74	C
chr01	75	C
chr01	76	C
chr01	77	T
chr01	78	A
chr01	79	A
chr01	80	C
chr01	81	A
chr01	82	C
chr01	83	A
chr01	84	G
chr01	85	C
chr01	86	C
chr01	87	C
chr01	88	T
chr01	89	A
chr01	90	A
chr01	91	T
chr01	92	C
chr01	93	T
chr01	94	A
chr01	95	A
chr01	96	C
chr01	97	C
chr01	98	C
chr01	99	T
chr01	100	G
chr01	101	G
chr01	102	C
chr01	103	C
chr01	104	A
chr01	105	A
chr01	106	C
chr01	107	C
chr01	108	T
chr01	109	G
chr01	110	T
chr01	111	C
chr01	112	T
chr01	113	C
chr01	114	T
chr01	115	C
chr01	116	A
chr01	117	A
chr01	118	C
chr01	119	T
chr01	120	T
chr01	121	A
chr01	122	C
chr01	123	C
chr01	124	C
chr01	125	T
chr01	126	C
chr01	127	C
chr01	128	A
chr01	129	T
chr01	130	T
chr01	131	A
chr01	132	C
chr01	133	C
chr01	134	C
chr01	135	T
chr01	136	G
chr01	137	C
chr01	138	C
chr01	139	T
chr01	140	C
chr01	141	C
chr01	142	A
chr01	143	C
chr01	144	T
chr01	145	C
chr01	146	G
chr01	147	T
chr01	148	T
chr01	149	A
chr01	150	C
chr01	151	C
chr01	152	C
chr01	153	T
chr01	154	G
chr01	155	T
chr01	156	C
chr01	157	C
chr01	158	C
chr01	159	A
chr01	160	T
chr01	161	T
chr01	162	C
chr01	163	A
chr01	164	A
chr01	165	C
chr01	166	C
chr01	167	A
chr01	168	T
chr01	169	A
chr01	170	C
chr01	171	C
chr01	172	A
chr01	173	C
chr01	174	T
chr01	175	C
chr01	176	C
chr01	177	G
chr01	178	A
chr01	179	A
chr01	180	C
chr01	181	C
chr01	182	A
chr01	183	C
chr01	184	C
chr01	185	A
chr01	186	T
chr01	187	C
chr01	188	C
chr01	189	A
chr01	190	T
chr01	191	C
chr01	192	C
chr01	193	C
chr01	194	T
chr01	195	C
chr01	196	T
chr01	197	A
chr01	198	C
chr01	199	T
chr01	200	T
chr01	201	A
chr01	202	C
chr01	203	T
chr01	204	A
chr01	205	C
chr01	206	C
chr01	207	A
chr01	208	C
chr01	209	T
chr01	210	C
chr01	211	A
chr01	212	C
chr01	213	C
chr01	214	C
chr01	215	A
chr01	216	C
chr01	217	C
chr01	218	G
chr01	219	T
chr01	220	T
chr01	221	A
chr01	222	C
chr01	223	C
chr01	224	C
chr01	225	T
chr01	226	C
chr01	227	C
chr01	228	A
chr01	229	A
chr01	230	T
chr01	231	T
chr01	232	A
chr01	233	C
chr01	234	C
chr01	235	C
chr01	236	A
chr01	237	T
chr01	238	A
chr01	239	T
chr01	240	C
chr01	241	C
chr01	242	A
chr01	243	A
chr01	244	C
chr01	245	C
chr01	246	C
chr01	247	A
chr01	248	C
chr01	249	T
chr01	250	G
chr01	251	C
chr01	252	C
chr01	253	A
chr01	254	C
chr01	255	T
chr01	256	T
chr01	257	A
chr01	258	C
chr01	259	C
chr01	260	C
chr01	261	T
chr01	262	A
chr01	263	C
chr01	264	C
chr01	265	A
chr01	266	T
chr01	267	T
chr01	268	A
chr01	269	C
chr01	270	C
chr01	271	C
chr01	272	T
chr01	273	A
chr01	274	C
chr01	275	C
chr01	276	A
chr01	277	T
chr01	278	C
chr01	279	C
chr01	280	A
chr01	281	C
chr01	282	C
chr01	283	A
chr01	284	T
chr01	285	G
chr01	286	A
chr01	287	C
chr01	288	C
chr01	289	T
chr01	290	A
chr01	291	C
chr01	292	T
chr01	293	C
chr01	294	A
chr01	295	C
chr01	296	C
chr01	297	A
chr01	298	T
chr01	299	A
chr01	300	C
chr01	301	T
chr01	302	G
chr01	303	T
chr01	304	T
chr01	305	C
chr01	306	T
chr01	307	T
chr01	308	C
chr01	309	T
chr01	310	A
chr01	311	C
chr01	312	C
chr01	313	C
chr01	314	A
chr01	315	C
chr01	316	C
chr01	317	A
chr01	318	T
chr01	319	A
chr01	320	T
chr01	321	T
chr01	322	G
chr01	323	A
chr01	324	A
chr01	325	A
chr01	326	C
chr01	327	G
chr01	328	C
chr01	329	T
chr01	330	A
chr01	331	A
chr01	332	C
chr01	333	A
chr01	334	A
chr01	335	A
chr01	336	T
chr01	337	G
chr01	338	A
chr01	339	T
chr01	340	C
chr01	341	G
chr01	342	T
chr01	343	A
chr01	344	A
chr01	345	A
chr01	346	T
chr01	347	A
chr01	348	A
chr01	349	C
chr01	350	A
chr01	351	C
chr01	352	A
chr01	353	C
chr01	354	A
chr01	355	C
chr01	356	G
chr01	357	T
chr01	358	G
chr01	359	C
chr01	360	T
chr01	361	T
chr01	362	A
chr01	363	C
chr01	364	C
chr01	365	C
chr01	366	T
chr01	367	A
chr01	368	C
chr01	369	C
chr01	370	A
chr01	371	C
chr01	372	T
chr01	373	T
chr01	374	T
chr01	375	A
chr01	376	T
chr01	377	A
chr01	378	C
chr01	379	C
chr01	380	A
chr01	381	C
chr01	382	C
chr01	383	A
chr01	384	C
chr01	385	C
chr01	386	A
chr01	387	C
chr01	388	A
chr01	389	T
chr01	390	G
chr01	391	C
chr01	392	C
chr01	393	A
chr01	394	T
chr01	395	A
chr01	396	C
chr01	397	T
chr01	398	C
chr01	399	A
chr01	400	C
chr01	401	C
chr01	402	C
chr01	403	T
chr01	404	C
chr01	405	A
chr01	406	C
chr01	407	T
chr01	408	T
chr01	409	G
chr01	410	T
chr01	411	A
chr01	412	T
chr01	413	A
chr01	414	C
chr01	415	T
chr01	416	G
chr01	417	A
chr01	418	T
chr01	419	T
chr01	420	T
chr01	421	T
chr01	422	A
chr01	423	C
chr01	424	G
chr01	425	T
chr01	426	A
chr01	427	C
chr01	428	G
chr01	429	C
chr01	430	A
chr01	431	C
chr01	432	A
chr01	433	C
chr01	434	G
chr01	435	G
chr01	436	A
chr01	437	T
chr01	438	G
chr01	439	C
chr01	440	T
chr01	441	A
chr01	442	C
chr01	443	A
chr01	444	G
chr01	445	T
chr01	446	A
chr01	447	T
chr01	448	A
chr01	449	T
chr01	450	A
chr01	451	C
chr01	452	C
chr01	453	A
chr01	454	T
chr01	455	C
chr01	456	T
chr01	457	C
chr01	458	A
chr01	459	A
chr01	460	A
chr01	461	C
chr01	462	T
chr01	463	T
chr01	464	A
chr01	465	C
chr01	466	C
chr01	467	C
chr01	468	T
chr01	469	A
chr01	470	C
chr01	471	T
chr01	472	C
chr01	473	T
chr01	474	C
chr01	475	A
chr01	476	G
chr01	477	A
chr01	478	T
chr01	479	T
chr01	480	C
chr01	481	C
chr01	482	A
chr01	483	C
chr01	484	T
chr01	485	T
chr01	486	C
chr01	487	A
chr01	488	C
chr01	489	T
chr01	490	C
chr01	491	C
chr01	492	A
chr01	493	T
chr01	494	G
chr01	495	G
chr01	496	C
chr01	497	C
chr01	498	C
chr01	499	A
chr01	500	T
chr01	501	C
chr01	502	T
chr01	503	C
chr01	504	T
chr01	505	C
chr01	506	A
chr01	507	C
chr01	508	T
chr01	509	G
chr01	510	A
chr01	511	A
chr01	512	T
chr01	513	C
chr01	514	A
chr01	515	G
chr01	516	T
chr01	517	A
chr01	518	C
chr01	519	C
chr01	520	A
chr01	521	A
chr01	522	A
chr01	523	T
chr01	524	G
chr01	525	C
chr01	526	A
chr01	527	C
chr01	528	T
chr01	529	C
chr01	530	A
chr01	531	C
chr01	532	A
chr01	533	T
chr01	534	C
chr01	535	A
chr01	536	T
chr01	537	T
chr01	538	A
chr01	539	T
chr01	540	G
chr01	541	C
chr01	542	A
chr01	543	C
chr01	544	G
chr01	545	G
chr01	546	C
chr01	547	A
chr01	548	C
chr01	549	T
chr01	550	T
chr01	551	G
chr01	552	C
chr01	553	C
chr01	554	T
chr01	555	C
chr01	556	A
chr01	557	G
chr01	558	C
chr01	559	G
chr01	560	G
chr01	561	T
chr01	562	C
chr01	563	T
chr01	564	A
chr01	565	T
chr01	566	A
chr01	567	C
chr01	568	C
chr01	569	C
chr01	570	T
chr01	571	G
chr01	572	T
chr01	573	G
chr01	574	C
chr01	575	C
chr01	576	A
chr01	577	T
chr01	578	T
chr01	579	T
chr01	580	A
chr01	581	C
chr01	582	C
chr01	583	C
chr01	584	A
chr01	585	T
chr01	586	A
chr01	587	A
chr01	588	C
chr01	589	G
chr01	590	C
chr01	591	C
chr01	592	C
chr01	593	A
chr01	594	T
chr01	595	C
chr01	596	A
chr01	597	T
chr01	598	T
chr01	599	A
chr01	600	T
chr01	601	C
chr01	602	C
chr01	603	A
chr01	604	C
chr01	605	A
chr01	606	T
chr01	607	T
chr01	608	T
chr01	609	T
chr01	610	G
chr01	611	A
chr01	612	T
chr01	613	A
chr01	614	T
chr01	615	C
chr01	616	T
chr01	617	A
chr01	618	T
chr01	619	A
chr01	620	T
chr01	621	C
chr01	622	T
chr01	623	C
chr01	624	A
chr01	625	T
chr01	626	T
chr01	627	C
chr01	628	G
chr01	629	G
chr01	630	C
chr01	631	G
chr01	632	G
chr01	633	T
chr01	634	C
chr01	635	C
chr01	636	C
chr01	637	A
chr01	638	A
chr01	639	A
chr01	640	T
chr01	641	A
chr01	642	T
chr01	643	T
chr01	644	G
chr01	645	T
chr01	646	A
chr01	647	T
chr01	648	A
chr01	649	A
chr01	650	C
chr01	651	T
chr01	652	G
chr01	653	C
chr01	654	C
chr01	655	C
chr01	656	T
chr01	657	T
chr01	658	A
chr01	659	A
chr01	660	T
chr01	661	A
chr01	662	C
chr01	663	A
chr01	664	T
chr01	665	A
chr01	666	C
chr01	667	G
chr01	668	T
chr01	669	T
chr01	670	A
chr01	671	T
chr01	672	A
chr01	673	C
chr01	674	C
chr01	675	A
chr01	676	C
chr01	677	T
chr01	678	T
chr01	679	T
chr01	680	T
chr01	681	G
chr01	682	C
chr01	683	A
chr01	684	C
chr01	685	C
chr01	686	A
chr01	687	T
chr01	688	A
chr01	689	T
chr01	690	A
chr01	691	C
chr01	692	T
chr01	693	T
chr01	694	A
chr01	695	C
chr01	696	C
chr01	697	A
chr01	698	C
chr01	699	T
chr01	700	C
chr01	701	C
chr01	702	A
chr01	703	T
chr01	704	T
chr01	705	T
chr01	706	A
chr01	707	T
chr01	708	A
chr01	709	T
chr01	710	A
chr01	711	C
chr01	712	A
chr01	713	C
chr01	714	T
chr01	715	T
chr01	716	A
chr01	717	T
chr01	718	G
chr01	719	T
chr01	720	C
chr01	721	A
chr01	722	A
chr01	723	T
chr01	724	A
chr01	725	T
chr01	726	T
chr01	727	A
chr01	728	C
chr01	729	A
chr01	730	G
chr01	731	A
chr01	732	A
chr01	733	A
chr01	734	A
chr01	735	A
chr01	736	T
chr01	737	C
chr01	738	C
chr01	739	C
chr01	740	C
chr01	741	A
chr01	742	C
chr01	743	A
chr01	744	A
chr01	745	A
chr01	746	A
chr01	747	A
chr01	748	T
chr01	749	C
chr01	750	A
chr01	751	C
chr01	752	C
chr01	753	T
chr01	754	A
chr01	755	A
chr01	756	A
chr01	757	C
chr01	758	A
chr01	759	T
chr01	760	A
chr01	761	A
chr01	762	A
chr01	763	A
chr01	764	A
chr01	765	T
chr01	766	A
chr01	767	T
chr01	768	T
chr01	769	C
chr01	770	T
chr01	771	A
chr01	772	C
chr01	773	T
chr01	774	T
chr01	775	T
chr01	776	T
chr01	777	C
chr01	778	A
chr01	779	A
chr01	780	C
chr01	781	A
chr01	782	A
chr01	783	T
chr01	784	A
chr01	785	A
chr01	786	T
chr01	787	A
chr01	788	C
chr01	789	A
chr01	790	T
chr01	791	A
chr01	792	A
chr01	793	A
chr01	794	C
chr01	795	A
chr01	796	T
chr01	797	A
chr01	798	T
chr01	799	T
chr01	800	G
chr01	801	G
chr01	802	C
chr01	803	T
chr01	804	T
chr01	805	G
chr01	806	T
chr01	807	G
chr01	808	G
chr01	809	T
chr01	810	A
chr01	811	G
chr01	812	C
chr01	813	A
chr01	814	A
chr01	815	C
chr01	816	A
chr01	817	C
chr01	818	T
chr01	819	A
chr01	820	T
chr01	821	C
chr01	822	A
chr01	823	T
chr01	824	G
chr01	825	G
chr01	826	T
chr01	827	A
chr01	828	T
chr01	829	C
chr01	830	A
chr01	831	C
chr01	832	T
chr01	833	A
chr01	834	A
chr01	835	C
chr01	836	G
chr01	837	T
chr01	838	A
chr01	839	A
chr01	840	A
chr01	841	A
chr01	842	G
chr01	843	T
chr01	844	T
chr01	845	C
chr01	846	C
chr01	847	T
chr01	848	C
chr01	849	A
chr01	850	A
chr01	851	T
chr01	852	A
chr01	853	T
chr01	854	T
chr01	855	G
chr01	856	C
chr01	857	A
chr01	858	A
chr01	859	T
chr01	860	T
chr01	861	T
chr01	862	G
chr01	863	C
chr01	864	T
chr01	865	T
chr01	866	G
chr01	867	A
chr01	868	A
chr01	869	C
chr01	870	G
chr01	871	G
chr01	872	A
chr01	873	T
chr01	874	G
chr01	875	C
chr01	876	T
chr01	877	A
chr01	878	T
chr01	879	T
chr01	880	T
chr01	881	C
chr01	882	A
chr01	883	G
chr01	884	A
chr01	885	A
chr01	886	T
chr01	887	A
chr01	888	T
chr01	889	T
chr01	890	T
chr01	891	C
chr01	892	G
chr01	893	T
chr01	894	A
chr01	895	C
chr01	896	T
chr01	897	T
chr01	898	A
chr01	899	C
chr01	900	A
chr01	901	C
chr01	902	A
chr01	903	G
chr01	904	G
chr01	905	C
chr01	906	C
chr01	907	A
chr01	908	T
chr01	909	A
chr01	910	C
chr01	911	A
chr01	912	T
chr01	913	T
chr01	914	A
chr01	915	G
chr01	916	A
chr01	917	A
chr01	918	T
chr01	919	A
chr01	920	A
chr01	921	T
chr01	922	A
chr01	923	T
chr01	924	G
chr01	925	T
chr01	926	C
chr01	927	A
chr01	928	C
chr01	929	A
chr01	930	T
chr01	931	C
chr01	932	A
chr01	933	C
chr01	934	T
chr01	935	G
chr01	936	T
chr01	937	C
chr01	938	G
chr01	939	T
chr01	940	A
chr01	941	A
chr01	942	C
chr01	943	A
chr01	944	C
chr01	945	T
chr01	946	C
chr01	947	T
chr01	948	T
chr01	949	T
chr01	950	A
chr01	951	T
chr01	952	T
chr01	953	C
chr01	954	A
chr01	955	C
chr01	956	C
chr01	957	G
chr01	958	A
chr01	959	G
chr01	960	C
chr01	961	A
chr01	962	A
chr01	963	T
chr01	964	A
chr01	965	A
chr01	966	T
chr01	967	A
chr01	968	C
chr01	969	G
chr01	970	G
chr01	971	T
chr01	972	A
chr01	973	G
chr01	974	T
chr01	975	G
chr01	976	G
chr01	977	C
chr01	978	T
chr01	979	C
chr01	980	A
chr01	981	A
chr01	982	A
chr01	983	C
chr01	984	T
chr01	985	C
chr01	986	A
chr01	987	T
chr01	988	G
chr01	989	C
chr01	990	G
chr01	991	G
chr01	992	G
chr01	993	T
chr01	994	G
chr01	995	C
chr01	996	T
chr01	997	A
chr01	998	T
chr01	999	G
chr01	1000	A
chr01	1001	T
chr01	1002	A
chr01	1003	C
chr01	1004	A
chr01	1005	A
chr01	1006	T
chr01	1007	T
chr01	1008	A
chr01	1009	T
chr01	1010	A
chr01	1011	T
chr01	1012	C
chr01	1013	T
chr01	1014	T
chr01	1015	A
chr01	1016	T
chr01	1017	T
chr01	1018	T
chr01	1019	C
chr01	1020	C
chr01	1021	A
chr01	1022	T
chr01	1023	T
chr01	1024	C
chr01	1025	C
chr01	1026	C
chr01	1027	A
chr01	1028	T
chr01	1029	A
chr01	1030	T
chr01	1031	G
chr01	1032	C
chr01	1033	T
chr01	1034	A
chr01	1035	A
chr01	1036	C
chr01	1037	C
chr01	1038	G
chr01	1039	C
chr01	1040	A
chr01	1041	A
chr01	1042	T
chr01	1043	A
chr01	1044	T
chr01	1045	C
chr01	1046	C
chr01	1047	T
chr01	1048	A
chr01	1049	A
chr01	1050	A
chr01	1051	A
chr01	1052	G
chr01	1053	C
chr01	1054	A
chr01	1055	T
chr01	1056	A
chr01	1057	A
chr01	1058	C
chr01	1059	T
chr01	1060	G
chr01	1061	A
chr01	1062	T
chr01	1063	G
chr01	1064	C
chr01	1065	A
chr01	1066	T
chr01	1067	C
chr01	1068	T
chr01	1069	T
chr01	1070	T
chr01	1071	A
chr01	1072	A
chr01	1073	T
chr01	1074	C
chr01	1075	T
chr01	1076	T
chr01	1077	G
chr01	1078	T
chr01	1079	A
chr01	1080	T
chr01	1081	G
chr01	1082	T
chr01	1083	G
chr01	1084	A
chr01	1085	C
chr01	1086	A
chr01	1087	C
chr01	1088	T
chr01	1089	A
chr01	1090	C
chr01	1091	T
chr01	1092	C
chr01	1093	A
chr01	1094	T
chr01	1095	A
chr01	1096	C
chr01	1097	G
chr01	1098	A
chr01	1099	A
chr01	1100	G
chr01	1101	G
chr01	1102	G
chr01	1103	A
chr01	1104	C
chr01	1105	T
chr01	1106	A
chr01	1107	T
chr01	1108	A
chr01	1109	T
chr01	1110	C
chr01	1111	T
chr01	1112	A
chr01	1113	G
chr01	1114	T
chr01	1115	C
chr01	1116	A
chr01	1117	A
chr01	1118	G
chr01	1119	A
chr01	1120	C
chr01	1121	G
chr01	1122	A
chr01	1123	T
chr01	1124	A
chr01	1125	C
chr01	1126	T
chr01	1127	G
chr01	1128	T
chr01	1129	G
chr01	1130	A
chr01	1131	T
chr01	1132	A
chr01	1133	G
chr01	1134	G
chr01	1135	T
chr01	1136	A
chr01	1137	C
chr01	1138	G
chr01	1139	T
chr01	1140	T
chr01	1141	A
chr01	1142	T
chr01	1143	T
chr01	1144	T
chr01	1145	A
chr01	1146	A
chr01	1147	T
chr01	1148	A
chr01	1149	G
chr01	1150	G
chr01	1151	A
chr01	1152	T
chr01	1153	C
chr01	1154	T
chr01	1155	A
chr01	1156	T
chr01	1157	A
chr01	1158	A
chr01	1159	C
chr01	1160	G
chr01	1161	A
chr01	1162	A
chr01	1163	A
chr01	1164	T
chr01	1165	G
chr01	1166	T
chr01	1167	C
chr01	1168	A
chr01	1169	A
chr01	1170	A
chr01	1171	T
chr01	1172	A
chr01	1173	A
chr01	1174	T
chr01	1175	T
chr01	1176	T
chr01	1177	T
chr01	1178	A
chr01	1179	C
chr01	1180	G
chr01	1181	G
chr01	1182	T
chr01	1183	A
chr01	1184	A
chr01	1185	T
chr01	1186	A
chr01	1187	T
chr01	1188	A
chr01	1189	A
chr01	1190	C
chr01	1191	T
chr01	1192	T
chr01	1193	A
chr01	1194	T
chr01	1195	C
chr01	1196	A
chr01	1197	G
chr01	1198	C
chr01	1199	G
chr01	1200	G
chr01	1201	C
chr01	1202	G
chr01	1203	T
chr01	1204	A
chr01	1205	T
chr01	1206	A
chr01	1207	C
chr01	1208	T
chr01	1209	A
chr01	1210	A
chr01	1211	A
chr01	1212	A
chr01	1213	C
chr01	1214	G
chr01	1215	G
chr01	1216	A
chr01	1217	C
chr01	1218	G
chr01	1219	T
chr01	1220	T
chr01	1221	A
chr01	1222	C
chr01	1223	G
chr01	1224	A
chr01	1225	T
chr01	1226	A
chr01	1227	T
chr01	1228	T
chr01	1229	G
chr01	1230	T
chr01	1231	C
chr01	1232	T
chr01	1233	C
chr01	1234	A
chr01	1235	C
chr01	1236	T
chr01	1237	T
chr01	1238	C
chr01	1239	A
chr01	1240	T
chr01	1241	C
chr01	1242	T
chr01	1243	T
chr01	1244	A
chr01	1245	C
chr01	1246	C
chr01	1247	A
chr01	1248	C
chr01	1249	C
chr01	1250	C
chr01	1251	T
chr01	1252	C
chr01	1253	T
chr01	1254	A
chr01	1255	T
chr01	1256	C
chr01	1257	T
chr01	1258	T
chr01	1259	A
chr01	1260	T
chr01	1261	T
chr01	1262	G
chr01	1263	C
chr01	1264	T
chr01	1265	G
chr01	1266	A
chr01	1267	T
chr01	1268	A
chr01	1269	G
chr01	1270	A
chr01	1271	A
chr01	1272	C
chr01	1273	A
chr01	1274	C
chr01	1275	T
chr01	1276	A
chr01	1277	A
chr01	1278	C
chr01	1279	C
chr01	1280	C
chr01	1281	C
chr01	1282	T
chr01	1283	C
chr01	1284	A
chr01	1285	G
chr01	1286	C
chr01	1287	T
chr01	1288	T
chr01	1289	T
chr01	1290	A
chr01	1291	T
chr01	1292	T
chr01	1293	T
chr01	1294	C
chr01	1295	T
chr01	1296	A
chr01	1297	G
chr01	1298	T
chr01	1299	T
chr01	1300	A
chr01	1301	C
chr01	1302	A
chr01	1303	G
chr01	1304	T
chr01	1305	T
chr01	1306	A
chr01	1307	C
chr01	1308	A
chr01	1309	C
chr01	1310	A
chr01	1311	A
chr01	1312	A
chr01	1313	A
chr01	1314	A
chr01	1315	A
chr01	1316	C
chr01	1317	T
chr01	1318	A
chr01	1319	T
chr01	1320	G
chr01	1321	C
chr01	1322	C
chr01	1323	A
chr01	1324	A
chr01	1325	C
chr01	1326	C
chr01	1327	C
chr01	1328	A
chr01	1329	G
chr01	1330	A
chr01	1331	A
chr01	1332	A
chr01	1333	T
chr01	1334	C
chr01	1335	T
chr01	1336	T
chr01	1337	G
chr01	1338	A
chr01	1339	T
chr01	1340	A
chr01	1341	T
chr01	1342	T
chr01	1343	T
chr01	1344	T
chr01	1345	A
chr01	1346	C
chr01	1347	G
chr01	1348	T
chr01	1349	G
chr01	1350	T
chr01	1351	C
chr01	1352	A
chr01	1353	A
chr01	1354	A
chr01	1355	A
chr01	1356	A
chr01	1357	A
chr01	1358	T
chr01	1359	G
chr01	1360	A
chr01	1361	G
chr01	1362	G
chr01	1363	G
chr01	1364	T
chr01	1365	C
chr01	1366	T
chr01	1367	C
chr01	1368	T
chr01	1369	A
chr01	1370	A
chr01	1371	A
chr01	1372	T
chr01	1373	G
chr01	1374	A
chr01	1375	G
chr01	1376	A
chr01	1377	G
chr01	1378	T
chr01	1379	T
chr01	1380	T
chr01	1381	G
chr01	1382	G
chr01	1383	T
chr01	1384	A
chr01	1385	C
chr01	1386	C
chr01	1387	A
chr01	1388	T
chr01	1389	G
chr01	1390	A
chr01	1391	C
chr01	1392	T
chr01	1393	T
chr01	1394	G
chr01	1395	T
chr01	1396	A
chr01	1397	A
chr01	1398	C
chr01	1399	T
chr01	1400	C
chr01	1401	G
chr01	1402	C
chr01	1403	A
chr01	1404	C
chr01	1405	T
chr01	1406	G
chr01	1407	C
chr01	1408	C
chr01	1409	C
chr01	1410	T
chr01	1411	G
chr01	1412	A
chr01	1413	T
chr01	1414	C
chr01	1415	T
chr01	1416	G
chr01	1417	C
chr01	1418	A
chr01	1419	A
chr01	1420	T
chr01	1421	C
chr01	1422	T
chr01	1423	T
chr01	1424	G
chr01	1425	T
chr01	1426	T
chr01	1427	C
chr01	1428	T
chr01	1429	T
chr01	1430	A
chr01	1431	G
chr01	1432	A
chr01	1433	A
chr01	1434	G
chr01	1435	T
chr01	1436	G
chr01	1437	A
chr01	1438	C
chr01	1439	G
chr01	1440	C
chr01	1441	A
chr01	1442	T
chr01	1443	A
chr01	1444	T
chr01	1445	T
chr01	1446	C
chr01	1447	T
chr01	1448	A
chr01	1449	T
chr01	1450	A
chr01	1451	C
chr01	1452	G
chr01	1453	G
chr01	1454	C
chr01	1455	C
chr01	1456	C
chr01	1457	G
chr01	1458	A
chr01	1459	C
chr01	1460	G
chr01	1461	C
chr01	1462	G
chr01	1463	A
chr01	1464	C
chr01	1465	G
chr01	1466	C
chr01	1467	G
chr01	1468	C
chr01	1469	C
chr01	1470	A
chr01	1471	A
chr01	1472	A
chr01	1473	A
chr01	1474	A
chr01	1475	A
chr01	1476	T
chr01	1477	G
chr01	1478	A
chr01	1479	A
chr01	1480	A
chr01	1481	A
chr01	1482	A
chr01	1483	C
chr01	1484	G
chr01	1485	A
chr01	1486	A
chr01	1487	G
chr01	1488	C
chr01	1489	A
chr01	1490	G
chr01	1491	C
chr01	1492	G
chr01	1493	A
chr01	1494	C
chr01	1495	T
chr01	1496	C
chr01	1497	A
chr01	1498	T
chr01	1499	T
chr01	1500	T
chr01	1501	T
chr01	1502	T
chr01	1503	A
chr01	1504	T
chr01	1505	T
chr01	1506	T
chr01	1507	A
chr01	1508	A
chr01	1509	G
chr01	1510	G
chr01	1511	A
chr01	1512	C
chr01	1513	A
chr01	1514	A
chr01	1515	A
chr01	1516	G
chr01	1517	G
chr01	1518	T
chr01	1519	T
chr01	1520	G
chr01	1521	C
chr01	1522	G
chr01	1523	A
chr01	1524	A
chr01	1525	G
chr01	1526	C
chr01	1527	C
chr01	1528	G
chr01	1529	C
chr01	1530	A
chr01	1531	C
chr01	1532	A
chr01	1533	T
chr01	1534	T
chr01	1535	T
chr01	1536	C
chr01	1537	C
chr01	1538	A
chr01	1539	A
chr01	1540	T
chr01	1541	T
chr01	1542	T
chr01	1543	C
chr01	1544	A
chr01	1545	T
chr01	1546	T
chr01	1547	G
chr01	1548	T
chr01	1549	T
chr01	1550	G
chr01	1551	T
chr01	1552	T
chr01	1553	T
chr01	1554	A
chr01	1555	T
chr01	1556	T
chr01	1557	G
chr01	1558	G
chr01	1559	A
chr01	1560	C
chr01	1561	A
chr01	1562	T
chr01	1563	A
chr01	1564	C
chr01	1565	A
chr01	1566	C
chr01	1567	T
chr01	1568	G
chr01	1569	T
chr01	1570	T
chr01	1571	A
chr01	1572	G
chr01	1573	C
chr01	1574	T
chr01	1575	T
chr01	1576	T
chr01	1577	A
chr01	1578	T
chr01	1579	T
chr01	1580	A
chr01	1581	C
chr01	1582	C
chr01	1583	G
chr01	1584	T
chr01	1585	C
chr01	1586	C
chr01	1587	A
chr01	1588	C
chr01	1589	G
chr01	1590	T
chr01	1591	T
chr01	1592	T
chr01	1593	T
chr01	1594	T
chr01	1595	T
chr01	1596	C
chr01	1597	T
chr01	1598	A
chr01	1599	C
chr01	1600	A
chr01	1601	A
chr01	1602	T
chr01	1603	A
chr01	1604	G
chr01	1605	T
chr01	1606	G
chr01	1607	T
chr01	1608	A
chr01	1609	G
chr01	1610	A
chr01	1611	A
chr01	1612	G
chr01	1613	T
chr01	1614	T
chr01	1615	T
chr01	1616	C
chr01	1617	T
chr01	1618	T
chr01	1619	T
chr01	1620	C
chr01	1621	T
chr01	1622	T
chr01	1623	A
chr01	1624	T
chr01	1625	G
chr01	1626	T
chr01	1627	T
chr01	1628	C
chr01	1629	A
chr01	1630	T
chr01	1631	C
chr01	1632	G
chr01	1633	T
chr01	1634	A
chr01	1635	T
chr01	1636	T
chr01	1637	C
chr01	1638	A
chr01	1639	T
chr01	1640	A
chr01	1641	A
chr01	1642	A
chr01	1643	A
chr01	1644	T
chr01	1645	G
chr01	1646	C
chr01	1647	T
chr01	1648	T
chr01	1649	C
chr01	1650	A
chr01	1651	C
chr01	1652	G
chr01	1653	A
chr01	1654	A
chr01	1655	C
chr01	1656	A
chr01	1657	C
chr01	1658	C
chr01	1659	G
chr01	1660	T
chr01	1661	C
chr01	1662	A
chr01	1663	T
chr01	1664	T
chr01	1665	G
chr01	1666	A
chr01	1667	T
chr01	1668	C
chr01	1669	A
chr01	1670	A
chr01	1671	A
chr01	1672	T
chr01	1673	A
chr01	1674	G
chr01	1675	G
chr01	1676	T
chr01	1677	C
chr01	1678	T
chr01	1679	A
chr01	1680	T
chr01	1681	A
chr01	1682	A
chr01	1683	T
chr01	1684	A
chr01	1685	T
chr01	1686	T
chr01	1687	A
chr01	1688	A
chr01	1689	T
chr01	1690	A
chr01	1691	T
chr01	1692	A
chr01	1693	C
chr01	1694	A
chr01	1695	T
chr01	1696	T
chr01	1697	T
chr01	1698	A
chr01	1699	T
chr01	1700	A
chr01	1701	T
chr01	1702	A
chr01	1703	A
chr01	1704	T
chr01	1705	C
chr01	1706	T
chr01	1707	A
chr01	1708	C
chr01	1709	G
chr01	1710	G
chr01	1711	T
chr01	1712	A
chr01	1713	T
chr01	1714	T
chr01	1715	T
chr01	1716	A
chr01	1717	T
chr01	1718	A
chr01	1719	T
chr01	1720	C
chr01	1721	A
chr01	1722	T
chr01	1723	C
chr01	1724	A
chr01	1725	A
chr01	1726	A
chr01	1727	A
chr01	1728	A
chr01	1729	A
chr01	1730	A
chr01	1731	A
chr01	1732	G
chr01	1733	T
chr01	1734	A
chr01	1735	G
chr01	1736	T
chr01	1737	T
chr01	1738	T
chr01	1739	T
chr01	1740	T
chr01	1741	T
chr01	1742	T
chr01	1743	A
chr01	1744	T
chr01	1745	T
chr01	1746	T
chr01	1747	T
chr01	1748	A
chr01	1749	T
chr01	1750	T
chr01	1751	T
chr01	1752	T
chr01	1753	G
chr01	1754	T
chr01	1755	T
chr01	1756	C
chr01	1757	G
chr01	1758	T
chr01	1759	T
chr01	1760	A
chr01	1761	A
chr01	1762	T
chr01	1763	T
chr01	1764	T
chr01	1765	T
chr01	1766	C
chr01	1767	A
chr01	1768	A
chr01	1769	T
chr01	1770	T
chr01	1771	T
chr01	1772	C
chr01	1773	T
chr01	1774	A
chr01	1775	T
chr01	1776	G
chr01	1777	G
chr01	1778	A
chr01	1779	A
chr01	1780	A
chr01	1781	C
chr01	1782	C
chr01	1783	C
chr01	1784	G
chr01	1785	T
chr01	1786	T
chr01	1787	C
chr01	1788	G
chr01	1789	T
chr01	1790	A
chr01	1791	A
chr01	1792	A
chr01	1793	A
chr01	1794	T
chr01	1795	T
chr01	1796	G
chr01	1797	G
chr01	1798	C
chr01	1799	G
chr01	1800	T
chr01	1801	T
chr01	1802	T
chr01	1803	G
chr01	1804	T
chr01	1805	C
chr01	1806	T
chr01	1807	C
chr01	1808	T
chr01	1809	A
chr01	1810	G
chr01	1811	T
chr01	1812	T
chr01	1813	T
chr01	1814	G
chr01	1815	C
chr01	1816	G
chr01	1817	A
chr01	1818	T
chr01	1819	A
chr01	1820	G
chr01	1821	T
chr01	1822	G
chr01	1823	T
chr01	1824	A
chr01	1825	G
chr01	1826	A
chr01	1827	T
chr01	1828	A
chr01	1829	C
chr01	1830	C
chr01	1831	G
chr01	1832	T
chr01	1833	C
chr01	1834	C
chr01	1835	T
chr01	1836	T
chr01	1837	G
chr01	1838	G
chr01	1839	A
chr01	1840	T
chr01	1841	A
chr01	1842	G
chr01	1843	A
chr01	1844	G
chr01	1845	C
chr01	1846	A
chr01	1847	C
chr01	1848	T
chr01	1849	G
chr01	1850	G
chr01	1851	A
chr01	1852	G
chr01	1853	A
chr01	1854	T
chr01	1855	G
chr01	1856	G
chr01	1857	C
chr01	1858	T
chr01	1859	G
chr01	1860	G
chr01	1861	C
chr01	1862	T
chr01	1863	T
chr01	1864	T
chr01	1865	A
chr01	1866	A
chr01	1867	T
chr01	1868	C
chr01	1869	T
chr01	1870	G
chr01	1871	C
chr01	1872	T
chr01	1873	G
chr01	1874	G
chr01	1875	A
chr01	1876	G
chr01	1877	T
chr01	1878	A
chr01	1879	C
chr01	1880	C
chr01	1881	A
chr01	1882	T
chr01	1883	G
chr01	1884	G
chr01	1885	A
chr01	1886	A
chr01	1887	C
chr01	1888	A
chr01	1889	C
chr01	1890	C
chr01	1891	G
chr01	1892	G
chr01	1893	T
chr01	1894	G
chr01	1895	A
chr01	1896	T
chr01	1897	C
chr01	1898	A
chr01	1899	T
chr01	1900	T
chr01	1901	C
chr01	1902	T
chr01	1903	G
chr01	1904	G
chr01	1905	T
chr01	1906	C
chr01	1907	A
chr01	1908	C
chr01	1909	T
chr01	1910	T
chr01	1911	G
chr01	1912	G
chr01	1913	T
chr01	1914	C
chr01	1915	T
chr01	1916	G
chr01	1917	G
chr01	1918	A
chr01	1919	G
chr01	1920	C
chr01	1921	A
chr01	1922	A
chr01	1923	T
chr01	1924	A
chr01	1925	C
chr01	1926	C
chr01	1927	G
chr01	1928	G
chr01	1929	T
chr01	1930	C
chr01	1931	A
chr01	1932	A
chr01	1933	C
chr01	1934	A
chr01	1935	T
chr01	1936	G
chr01	1937	G
chr01	1938	T
chr01	1939	G
chr01	1940	G
chr01	1941	T
chr01	1942	G
chr01	1943	A
chr01	1944	A
chr01	1945	G
chr01	1946	T
chr01	1947	C
chr01	1948	A
chr01	1949	C
chr01	1950	C
chr01	1951	G
chr01	1952	T
chr01	1953	A
chr01	1954	G
chr01	1955	T
chr01	1956	T
chr01	1957	G
chr01	1958	A
chr01	1959	A
chr01	1960	A
chr01	1961	A
chr01	1962	C
chr01	1963	G
chr01	1964	G
chr01	1965	C
chr01	1966	T
chr01	1967	T
chr01	1968	C
chr01	1969	A
chr01	1970	G
chr01	1971	C
chr01	1972	A
chr01	1973	A
chr01	1974	C
chr01	1975	T
chr01	1976	T
chr01	1977	C
chr01	1978	G
chr01	1979	A
chr01	1980	C
chr01	1981	T
chr01	1982	G
chr01	1983	G
chr01	1984	G
chr01	1985	T
chr01	1986	A
chr01	1987	G
chr01	1988	G
chr01	1989	T
chr01	1990	T
chr01	1991	T
chr01	1992	C
chr01	1993	A
chr01	1994	G
chr01	1995	T
chr01	1996	T
chr01	1997	G
chr01	1998	G
chr01	1999	G
[truncated: 8,000 more rows]
