# Supplementary material for: Mutational sources of trans-regulatory variation affecting gene expression in Saccharomyces cerevisiae
Source: eLife. 2021 Aug 31;10:e67806. doi: 10.7554/eLife.67806 (PMC8456550; doi:10.7554/eLife.67806)
Supplement: Supplementary file 12. [file elife-67806-supp12.bz2 › Input_Files/SourceData7.txt]

ID.1	STRAIN.1	ID.2	STRAIN.2	EXPERIMENT	TYPE	MUTATION	CLONE	EMS.COLLECTION	EMS.MUTANT	GENE	LINKAGE.GROUP	CAUSATIVE	MATING.TYPE	POSITION	COLUMN	ROW	PLATE	DAY	REP	REP.UNIQUE	RUN	COUNTS.INITIAL	COUNTS.GATES	COUNTS.SINGLES	COUNTS.FINAL	FSC.KURTOSIS	WIDTH	FSC.THRESHOLD	FSC.MEDIAN.INITIAL	FSC.MAD.INITIAL	FL1.MEDIAN.INITIAL	FL1.MAD.INITIAL	YFP.MEDIAN.INITIAL	YFP.MAD.INITIAL	YFP.SD.INITIAL	INTERCEPT.INITIAL	SLOPE.INITIAL	THETA	YFP.MEDIAN.ROT	YFP.MAD.ROT	YFP.SD.ROT	FSC.MEDIAN.FINAL	FSC.MAD.FINAL	YFP.MEDIAN.FINAL	YFP.MAD.FINAL	YFP.SD.FINAL	log.YFP.MEDIAN	log.YFP.MAD	log.YFP.SD	log.RNA.MEDIAN	log.RNA.SD	FSC.MEDIAN.CORRECT	log.RNA.MEDIAN.CORRECT	YFP.MEDIAN.CORRECT	log.RNA.SD.CORRECT	YFP.SD.CORRECT	REFERENCE	NEGATIVE	YFP.MEDIAN.ADJUST	YFP.SD.ADJUST	FSC.MEDIAN.RELATIVE	YFP.MEDIAN.RELATIVE	YFP.SD.SCALED	YFP.SD.RELATIVE	YFP.CV	YFP.CV.RELATIVE	YFP.OUTLIER
CTRL	1617	191	1182	A	WT	WT	1	NAN	NAN	NAN	NAN	NAN	x	A01	1	A	1	1	1	1	1	19499	15509	6108	4954	-0.498933841	55	5.106415122	5.713581257	0.16141471	5.45554374	0.221880851	0.953217325	0.02142487	0.020609213	0.678383902	0.048101779	0.048064731	0.952004069	0.019523002	0.019377153	5.71364088	0.161498673	1.057057373	0.084649138	0.084799614	0.055488984	0.080348786	0.079505619	0.365423492	0.152168289	5.71364088	0.223510723	0.983328161	0.136122189	0.065821338	172	185	0.465988037	0.06159635	1.002770581	1.014436798	0.134092721	1.021318921	0.132184402	1.00678418	NO
172	1617	172	1617	A	WT	WT	1	NAN	NAN	NAN	NAN	NAN	x	A02	2	A	1	1	1	1	1	19500	15966	6300	4899	-0.547763132	54	5.093821424	5.697417671	0.151293434	5.435200726	0.214992185	0.951396528	0.021470247	0.021259222	0.667849889	0.049767571	0.049726544	0.949954782	0.019938632	0.020044216	5.697351705	0.151260148	1.048197976	0.085785773	0.086449408	0.047072476	0.081777902	0.081618766	0.349398062	0.157634786	5.697351705	0.207485293	0.975640889	0.141588686	0.06737621	172	185	0.458300766	0.063151222	0.999911756	0.997701924	0.137477613	1.047099994	0.137794275	1.049511853	NO
83	2954	191	1182	A	SINGLE.SITE	ADE6_G3327A	2	1587	1P09E01	ADE6	NAN	YES	x	A03	3	A	1	1	1	1	1	14124	10044	3077	2897	-0.263897361	58	5.177014959	5.749355948	0.080053166	5.736877546	0.106738541	0.996725575	0.009181258	0.009535377	0.692171839	0.0529718	0.052922337	0.99632914	0.008460511	0.008722619	5.749599185	0.079960453	1.28792663	0.052389792	0.053737571	0.253033662	0.040505841	0.041674216	0.712045693	0.068182387	5.749599185	0.570132925	1.18365271	0.052136287	0.035654471	172	185	0.666312586	0.031429482	1.009081432	1.450535105	0.06842069	0.52112706	0.047169276	0.35926539	NO
CTRL	1617	191	1182	A	WT	WT	1	NAN	NAN	NAN	NAN	NAN	x	A05	5	A	1	1	1	1	1	18415	14250	5259	4149	-0.636431933	55	5.092980232	5.716535863	0.166819727	5.457424663	0.217253601	0.952717898	0.019990105	0.019731908	0.688728036	0.046180041	0.046147255	0.951516484	0.01868775	0.018525528	5.716879261	0.166907329	1.054936576	0.081604928	0.080915358	0.053480647	0.077248959	0.07597162	0.361610576	0.145752889	5.716879261	0.219697808	0.981487951	0.129706789	0.06248051	172	185	0.464147828	0.058255521	1.003338933	1.010430738	0.126819874	0.965925191	0.125510705	0.955953886	NO
68	2800	191	1182	A	SINGLE.SITE	NAM7_G1304A	1	1575	1P04G01	NAM7	NAN	YES	x	A06	6	A	1	1	1	1	1	17641	13834	5453	4337	-0.626871121	56	5.123971271	5.727271162	0.145061428	5.550016659	0.182212969	0.965706418	0.017525944	0.018135129	0.771618517	0.033888373	0.033875409	0.964310344	0.017350811	0.017503031	5.727581422	0.144475056	1.113352142	0.082883851	0.084215624	0.107375412	0.074502577	0.07510887	0.461658605	0.137255127	5.727581422	0.319745836	1.03217496	0.121209027	0.064530811	172	185	0.514834836	0.060305823	1.005217212	1.120774271	0.131283297	0.999920904	0.117136251	0.892169753	NO
13	1496	191	1182	A	EMS.MUTANT	1P09F07	1	1496	1P09F07	NAN	NAN	NAN	x	A07	7	A	1	1	1	1	1	18462	15090	6574	4197	-0.817125066	55	5.093031004	5.705719208	0.171192835	5.381818772	0.195727701	0.940037596	0.018995047	0.019227456	0.772963688	0.029281831	0.029273467	0.939350221	0.018329252	0.018728767	5.705991825	0.171313143	1.004553777	0.072574118	0.074803271	0.00454344	0.071954734	0.073521536	0.266470357	0.148192312	5.705991825	0.124557588	0.937770951	0.132146212	0.057878558	172	185	0.420430828	0.053653569	1.001428137	0.915260626	0.116801615	0.889620988	0.127615688	0.971986517	NO
55	2525	191	1182	A	SINGLE.SITE	PRE7_G83A	1	1496	1P09F07	PRE7	NAN	YES	x	A08	8	A	1	1	1	1	1	18730	14623	6516	3332	-0.999631825	55	5.076328988	5.689774823	0.177694892	5.348072067	0.222362841	0.937596387	0.019677199	0.020582949	0.705448222	0.040800941	0.040778323	0.936756776	0.018429059	0.019548249	5.689868397	0.177429005	0.994419746	0.070483715	0.075422473	-0.005595883	0.0714856	0.075361522	0.246189617	0.152480275	5.689868397	0.104276848	0.928977683	0.136434175	0.058556935	172	185	0.41163756	0.054331947	0.9985984	0.896118043	0.118278414	0.900869049	0.13198977	1.005301763	NO
CTRL	1617	191	1182	A	WT	WT	1	NAN	NAN	NAN	NAN	NAN	x	A09	9	A	1	1	1	1	1	19165	15318	6376	4488	-0.687729507	55	5.076639891	5.694933187	0.163703873	5.42230744	0.22891922	0.949694665	0.021923036	0.021581708	0.658973241	0.051049137	0.051004861	0.948222709	0.019730945	0.020210316	5.695005717	0.163511617	1.040819866	0.082967948	0.085990054	0.040008735	0.079894011	0.081737954	0.335853247	0.158935423	5.695005717	0.193940478	0.969238925	0.142889323	0.067080357	172	185	0.451898802	0.062855369	0.999500024	0.983765112	0.136833553	1.042194505	0.139091691	1.059393642	NO
129	3226	191	1182	A	SINGLE.SITE	ADE5_G2081A	1	1597	1P11D07	ADE5	NAN	YES	x	A10	10	A	1	1	1	1	1	14037	9936	2566	2404	-0.719371496	57	5.150798951	5.735085231	0.065604245	5.662784738	0.0854959	0.98727444	0.007799958	0.007972405	0.840617309	0.025571918	0.025566346	0.987273262	0.007309536	0.007814094	5.7351418	0.065685016	1.234043061	0.041981601	0.044441276	0.21029582	0.033997357	0.036175953	0.641228697	0.060525185	5.7351418	0.499315928	1.136898101	0.044479085	0.028338333	172	185	0.619557978	0.024113345	1.006544093	1.348752244	0.052493761	0.399819397	0.03892024	0.296436501	NO
185	3139	191	1182	A	NULL	NULL	1	NAN	NAN	NAN	NAN	NAN	x	A11	11	A	1	1	1	1	1	19473	16136	7522	7253	-0.585627425	53	5.073308273	5.628150769	0.192241218	2.970811611	0.20723501	0.528493228	0.032068429	0.033775436	0.559430159	-0.00549682	-0.005496764	0.528657365	0.032170575	0.033760296	5.628136601	0.192222775	0.520120083	0.005146011	0.005077984	-0.653695566	0.009899498	0.009756189	-2.945149133	0.24968073	5.628136601	-3.087061902	0.517429315	0.23363463	0.004122983	172	185	8.92E-05	-0.000102005	0.987764182	0.000194167	-0.000222061	-0.001691332	-1.143662314	-8.710718597	NO
106	3183	191	1182	A	SINGLE.SITE	EXG2_C379T	1	2140	2P15D07	EXG2	A	NO	x	A12	12	A	1	1	1	1	1	19517	15921	6055	4984	-0.416291219	55	5.08089124	5.700216376	0.143208276	5.444642702	0.188529272	0.952263367	0.019506623	0.01901645	0.766387051	0.032608642	0.032597092	0.951446885	0.018625065	0.018506879	5.700268311	0.143160597	1.05463451	0.080770401	0.080569702	0.053194268	0.076677274	0.075802456	0.361066318	0.14520927	5.700268311	0.219153549	0.98122585	0.129163169	0.062184791	172	185	0.463885727	0.057959803	1.000423633	1.009860155	0.126176107	0.96102193	0.124944139	0.951638626	NO
161	R128	191	1182	A	RAP1.MUTANT	PLATE	1	NAN	NAN	RAP1	NAN	NAN	x	B02	2	B	1	1	1	1	1	22867	18127	7592	5811	-0.58983902	52	5.03564493	5.604652576	0.113159084	5.394022428	0.160951582	0.96091309	0.016543127	0.017233286	0.783173334	0.031712895	0.03170227	0.960597664	0.016802723	0.016820737	5.604856828	0.1134861	1.095794374	0.078131523	0.077344666	0.091479556	0.071496502	0.070740031	0.432625436	0.129770273	5.610721743	0.294770658	1.019043024	0.119930488	0.062275207	182	185	0.5017029	0.058050219	0.984751036	1.097093143	0.126940659	0.985255743	0.115706365	0.898060251	NO
CTRL	1617	191	1182	A	WT	WT	1	NAN	NAN	NAN	NAN	NAN	x	B03	3	B	1	1	1	1	1	18877	14928	6794	4266	-0.840170162	55	5.094519668	5.691565491	0.166362845	5.435541772	0.228805849	0.952341413	0.021579043	0.021483158	0.661062444	0.051177303	0.051132693	0.950418271	0.019742373	0.019907657	5.691668631	0.166892498	1.050189309	0.085297273	0.085858548	0.048970442	0.081106898	0.081064835	0.353022551	0.15599098	5.697533545	0.215167772	0.979310742	0.146151195	0.070083673	172	185	0.461970619	0.065858685	0.999943669	1.005691043	0.143371649	1.091991994	0.142560332	1.085812588	NO
172	1617	191	1182	A	WT	WT	1	NAN	NAN	NAN	NAN	NAN	x	B04	4	B	1	1	1	1	1	19059	15434	6276	4518	-0.669153293	55	5.083767405	5.688184367	0.146521203	5.435172001	0.207080933	0.952876626	0.02158432	0.021581177	0.675620662	0.048742436	0.04870389	0.951110375	0.020228891	0.020454092	5.688312975	0.146474154	1.053176329	0.087195125	0.088616081	0.051810673	0.082695101	0.083435113	0.358434805	0.160131943	5.694177889	0.220580027	0.981913109	0.150292158	0.072460499	172	185	0.464572985	0.06823551	0.999354736	1.011356289	0.1485459	1.131401745	0.146877912	1.118697493	NO
CTRL	1617	191	1182	A	WT	WT	1	NAN	NAN	NAN	NAN	NAN	x	B07	7	B	1	1	1	1	1	18589	15198	5756	5145	-0.041775527	55	5.084176941	5.698675453	0.144521465	5.435006172	0.191662261	0.950167959	0.019415899	0.018689159	0.719115993	0.040544854	0.040522659	0.94899405	0.018347969	0.017906381	5.698534476	0.145082161	1.044093207	0.07780739	0.077166731	0.043148764	0.07450577	0.073020064	0.341885136	0.141769552	5.70439939	0.204030357	0.973999664	0.131929767	0.062563403	172	185	0.456659541	0.058338415	1.001148657	0.994129045	0.12700033	0.967299635	0.127750347	0.973012145	NO
191	1182	191	1182	A	GFP.MATALPHA	GFP.MATALPHA	1	NAN	NAN	NAN	NAN	NAN	x	B08	8	B	1	1	1	1	1	18572	14595	5497	4530	-0.413702036	55	5.081738139	5.69843549	0.142147279	5.205541322	0.20397846	0.911030972	0.021648246	0.022092373	0.615018149	0.051946332	0.051899683	0.909267273	0.020654794	0.020983102	5.69824792	0.14254879	0.898740636	0.064051209	0.064823487	-0.106760789	0.071441719	0.07188337	0.031221607	0.162481796	5.704112835	-0.106633172	0.847364841	0.152642011	0.053055717	172	185	0.330024718	0.048830729	1.001098365	0.718450242	0.106302489	0.809654264	0.147960823	1.126945497	NO
102	3174	191	1182	A	RAP1.MUTANT	F548	1	NAN	NAN	RAP1	NAN	NAN	x	B09	9	B	1	1	1	1	1	22855	18713	8189	6573	-0.343333455	52	5.025245882	5.592819393	0.109870706	5.345522718	0.157730853	0.954999682	0.015838818	0.01632948	0.774772509	0.032224744	0.032213597	0.954726714	0.015738062	0.015935202	5.592967621	0.110225408	1.069049581	0.070125622	0.070064934	0.066770012	0.065679468	0.065665926	0.386714584	0.123079125	5.598832535	0.248859806	0.995742287	0.11323934	0.056162196	182	185	0.478402163	0.051937207	0.982664333	1.04614052	0.113573101	0.881502824	0.108563906	0.842623727	NO
65	2795	191	1182	A	SINGLE.SITE	SDS23_G676A	2	1487	1P07H05	SDS23	NAN	YES	x	B10	10	B	1	1	1	1	1	18983	15794	6708	5375	-0.381671166	54	5.081597298	5.696509282	0.141547043	5.466010043	0.187576584	0.95680015	0.018031604	0.018638674	0.71343524	0.042721761	0.042695799	0.955845625	0.01688869	0.017671284	5.696693575	0.141887218	1.074052461	0.075487273	0.079306086	0.071438841	0.070382523	0.073416954	0.395464469	0.138098884	5.70255849	0.257609691	1.000100922	0.128259099	0.064170432	172	185	0.482760798	0.059945443	1.00082557	1.050950409	0.130498766	0.993945514	0.124172144	0.94575872	NO
CTRL	1617	191	1182	A	WT	WT	1	NAN	NAN	NAN	NAN	NAN	x	B11	11	B	1	1	1	1	1	19926	15692	5971	4566	-0.644915128	54	5.077971709	5.68353196	0.135242861	5.419171494	0.184470779	0.950336557	0.019388119	0.019847698	0.70461455	0.043234033	0.043207126	0.948784661	0.019001887	0.01896173	5.683759589	0.135092864	1.04320267	0.080618312	0.080730113	0.042295471	0.077377434	0.076807989	0.340247714	0.148559198	5.689624504	0.202392935	0.973223806	0.138719413	0.065675545	172	185	0.455883682	0.061450557	0.998555596	0.992440032	0.133775336	1.018901552	0.134794377	1.026663092	NO
14	1509	191	1182	A	EMS.MUTANT	1P12D09	1	1509	1P12D09	NAN	NAN	NAN	x	B12	12	B	1	1	1	1	1	19822	15950	5784	5249	-0.120693327	55	5.091135937	5.704869169	0.124896916	5.46416005	0.154466381	0.955171145	0.017496386	0.017139425	0.853063381	0.017898353	0.017896443	0.954596291	0.017310148	0.017007885	5.70469257	0.124755994	1.068469278	0.077117371	0.075241392	0.066227043	0.072424581	0.070263468	0.385694677	0.132307189	5.710557484	0.247839899	0.995236711	0.122467404	0.060677031	172	185	0.477896588	0.056452043	1.002229431	1.040361223	0.122893776	0.936022011	0.118126063	0.899708669	NO
185	3139	185	3139	A	NULL	NULL	1	NAN	NAN	NAN	NAN	NAN	x	C02	2	C	1	1	1	1	1	18957	15337	5942	5741	-0.416504836	54	5.092892209	5.671206177	0.161578966	2.982271233	0.200619365	0.525715151	0.028894955	0.030254497	0.358200673	0.029537716	0.02952913	0.524984918	0.028234802	0.029908722	5.671026241	0.161848979	0.519544315	0.004378652	0.004494463	-0.65480317	0.008433742	0.008639244	-2.973867682	0.227427957	5.674970875	-3.117081744	0.516907424	0.215016881	0.003682218	172	185	-0.0004327	-0.000542771	0.995983816	-0.00094197	-0.00118159	-0.008999593	1.254381503	9.554012718	NO
119	3204	191	1182	A	SINGLE.SITE	TRA1_G8560A	2	2013	2P01D04	TRA1	NAN	YES	x	C03	3	C	1	1	1	1	1	20673	17329	7156	5594	-0.279694871	53	5.045799419	5.642808654	0.107341651	5.413096822	0.145500323	0.956698751	0.015143765	0.016174613	0.777748956	0.031712895	0.03170227	0.956046087	0.015106859	0.015737742	5.642818068	0.107337542	1.074953403	0.067544436	0.070305573	0.072277315	0.063265397	0.065327827	0.397032087	0.122234161	5.646762701	0.253818024	0.998207472	0.109823084	0.054738604	172	185	0.480867348	0.050513615	0.99103315	1.046828446	0.109966063	0.837557921	0.105046881	0.800090907	NO
CTRL	1617	191	1182	A	WT	WT	1	NAN	NAN	NAN	NAN	NAN	x	C04	4	C	1	1	1	1	1	18623	14612	5957	4357	-0.725259793	55	5.088591059	5.701889917	0.16634684	5.448860846	0.224453754	0.953150478	0.020226477	0.020129902	0.693489044	0.045539538	0.045508097	0.951851453	0.018777383	0.0188817	5.701354619	0.166230701	1.056392686	0.082204173	0.082565363	0.054859978	0.077732307	0.077451502	0.364230035	0.148335976	5.705299253	0.221015972	0.982123338	0.135924899	0.065562174	172	185	0.464783214	0.061337185	1.001306587	1.011813948	0.133528531	1.017021759	0.131969451	1.005147005	NO
110	3190	191	1182	A	SINGLE.SITE	CCC2_G2159A	1	2140	2P15D07	CCC2	A	YES	x	C06	6	C	1	1	1	1	1	18370	15148	6215	5115	-0.267664745	54	5.060963325	5.668926119	0.125707184	5.376885233	0.197450149	0.94415889	0.021024143	0.020685573	0.6344177	0.054638424	0.05458415	0.94256539	0.019492626	0.019456316	5.669054631	0.125846023	1.017405956	0.07891269	0.079675277	0.017256207	0.077637191	0.077320228	0.291612989	0.153925071	5.672999265	0.148398926	0.948338663	0.141513994	0.06347702	172	185	0.43099854	0.059252032	0.995637789	0.938266101	0.128989237	0.982448172	0.137476178	1.047089062	NO
74	2910	191	1182	A	SINGLE.SITE	ADE4_G856A	1	1595	1P11B11	ADE4	NAN	YES	x	C07	7	C	1	1	1	1	1	21759	17183	8131	7749	0.265100712	51	5.021601167	5.594837667	0.102458314	5.401596963	0.147987627	0.964454377	0.012719545	0.012449282	0.538089185	0.076206892	0.076059881	0.96499042	0.00972488	0.010118638	5.594781903	0.102846021	1.116623921	0.046999586	0.048485196	0.110309777	0.042001061	0.043497746	0.466976803	0.078602326	5.598726536	0.32376274	1.034317831	0.066191249	0.035381583	172	185	0.516977708	0.031156594	0.982602579	1.125439215	0.067826625	0.516602354	0.060266804	0.459022884	NO
CTRL	1617	191	1182	A	WT	WT	1	NAN	NAN	NAN	NAN	NAN	x	C08	8	C	1	1	1	1	1	18461	14848	5838	4539	-0.536725922	55	5.084812283	5.695198768	0.152325591	5.434303776	0.201558785	0.951883409	0.019665649	0.01964544	0.718055449	0.041057032	0.041033986	0.950537565	0.018829858	0.018775865	5.695520399	0.152423192	1.05070301	0.081002229	0.081164579	0.049459473	0.077209524	0.07661552	0.353955426	0.147325303	5.699465032	0.210741363	0.977192843	0.134914227	0.064409491	172	185	0.45985272	0.060184503	1.000282654	1.001080465	0.131019188	0.997909315	0.130877779	0.996832273	NO
176	2005	191	1182	A	CHR2SNP.69593(T)	POLYMORPHISM	2	NAN	NAN	NAN	NAN	NAN	x	C09	9	C	1	1	1	1	1	18963	15586	6668	5199	-0.465059838	55	5.08037792	5.685516922	0.140339599	5.426029529	0.198441836	0.951241004	0.020007177	0.020155505	0.671200921	0.049254991	0.049215217	0.94947236	0.01884379	0.018999249	5.68566935	0.14001733	1.04613295	0.080049803	0.081381733	0.045100461	0.076966287	0.077166006	0.345625517	0.148955097	5.689613983	0.202411454	0.973232573	0.13654402	0.064646821	172	185	0.45589245	0.060421832	0.998553749	0.992459119	0.131535845	1.001844441	0.132535278	1.009456633	NO
10	333	190	1180	A	EMS.MUTANT	Y333	1	333	Y333	NAN	NAN	NAN	a	C10	10	C	1	1	1	1	1	15608	12557	4174	3704	0.415196733	52	5.036894336	5.605808557	0.086921827	5.305521184	0.137245122	0.945791766	0.015131555	0.016651878	0.630873616	0.056177115	0.05611813	0.945751938	0.014792966	0.015988442	5.606231495	0.087275165	1.030466579	0.060796718	0.066967544	0.030011689	0.059562681	0.064325627	0.316531804	0.126190903	5.610176129	0.173317741	0.959656589	0.113779826	0.052324431	170	171	0.443517263	0.048228525	0.99413421	1.181091145	0.12843307	0.818699096	0.108741032	0.693171818	NO
92	3091	191	1182	A	SINGLE.SITE	SSN2_C2911T	1	89	Y89	SSN2	NAN	YES	x	C11	11	C	1	1	1	1	1	23408	19226	8642	7854	0.488469909	53	5.05678697	5.631331629	0.099260577	5.373841244	0.170098576	0.953446664	0.017393968	0.017923034	0.490979065	0.082124021	0.08194014	0.953677346	0.015373572	0.016087037	5.631346406	0.099876596	1.064397253	0.06828029	0.071119086	0.062408679	0.063967205	0.066417049	0.378508523	0.125960303	5.63529104	0.23529446	0.989059844	0.113549226	0.055557101	172	185	0.47171972	0.051332112	0.98901982	1.026914436	0.111747898	0.85112929	0.108819093	0.828822013	NO
CTRL	1617	191	1182	A	WT	WT	1	NAN	NAN	NAN	NAN	NAN	x	C12	12	C	1	1	1	1	1	18945	15393	5996	5200	-0.226723672	54	5.072838091	5.683817629	0.122889746	5.426918522	0.176678436	0.951359259	0.018271262	0.018267411	0.736191175	0.037856261	0.037838193	0.950167043	0.017823023	0.017646539	5.683759281	0.12309041	1.049109037	0.076594008	0.07638122	0.047941268	0.072956187	0.072109565	0.351057944	0.139045121	5.687703914	0.207843881	0.975811557	0.126634044	0.060281526	172	185	0.458471433	0.056056537	0.998218523	0.99807346	0.122032777	0.929464205	0.122268332	0.931258312	NO
32	2053	191	1182	A	EMS.MUTANT	2P05G06	1	2053	2P05G06	NAN	NAN	NAN	x	D01	1	D	1	1	1	1	1	22710	18576	8558	5928	-0.651681649	54	5.041081281	5.656069919	0.154036947	5.322542827	0.222675265	0.937362072	0.023059491	0.023431755	0.578260223	0.063489641	0.063404539	0.935464887	0.02082934	0.021410279	5.65639325	0.154405866	0.989447787	0.079283692	0.082184923	-0.010608282	0.080409767	0.082226045	0.236087036	0.16783887	5.664686922	0.094363409	0.9247439	0.158359034	0.067296529	172	185	0.407403777	0.06307154	0.994178934	0.886901272	0.13730415	1.045778807	0.154813342	1.179137792	NO
CTRL	1617	191	1182	A	WT	WT	1	NAN	NAN	NAN	NAN	NAN	x	D02	2	D	1	1	1	1	1	18722	14934	5939	4597	-0.571537271	55	5.086162329	5.703638675	0.151040158	5.454857051	0.208078902	0.952950398	0.020045981	0.019728284	0.68444129	0.047076809	0.047042077	0.951630896	0.018425465	0.018566202	5.703512321	0.151296385	1.055433494	0.079500323	0.081329066	0.053951578	0.075673302	0.076236781	0.362505276	0.146367088	5.711805993	0.220781649	0.982010327	0.136887253	0.066010887	172	185	0.464670204	0.061785899	1.00244855	1.011567929	0.134505361	1.024461796	0.132967206	1.012746417	NO
172	1617	191	1182	A	WT	WT	1	NAN	NAN	NAN	NAN	NAN	x	D03	3	D	1	1	1	1	1	18967	15179	6474	4263	-0.8008481	55	5.099659374	5.696657756	0.17305739	5.4287016	0.225216924	0.951080675	0.020463886	0.020565844	0.688008785	0.046180041	0.046147255	0.95029543	0.018877789	0.019240297	5.696878024	0.172851025	1.04966083	0.081628604	0.082669434	0.048467093	0.078105529	0.078239355	0.352061929	0.150341231	5.705171696	0.210338302	0.977000456	0.140861396	0.067221633	172	185	0.459660333	0.062996645	1.0012842	1.000661646	0.137141106	1.044536981	0.137050427	1.043846324	NO
123	3210	191	1182	A	SINGLE.SITE	ADE5_G479A	2	2146	2P15G08	ADE5	NAN	YES	x	D04	4	D	1	1	1	1	1	12828	8959	2087	1978	-0.813633257	58	5.151735212	5.741107458	0.06597763	5.646821153	0.092301655	0.983514368	0.010802882	0.011195524	0.879289729	0.0181541	0.018152106	0.983392298	0.010861037	0.011138426	5.741124074	0.066008758	1.212093626	0.060419632	0.0617191	0.192349134	0.0499281	0.050961328	0.610879549	0.086646228	5.749417746	0.469155922	1.117969558	0.077166392	0.04770329	172	185	0.600629435	0.043478302	1.009049588	1.307545584	0.094650475	0.720906549	0.072387897	0.55134334	NO
156	3274	191	1182	A	SINGLE.SITE	ADE2_C1477T	1	2217	2P09C10	ADE2	NAN	YES	x	D05	5	D	1	1	1	1	1	18889	14800	5470	4792	-0.410687116	54	5.074519016	5.670846305	0.11521671	5.44654804	0.188033203	0.958376706	0.022830567	0.022675707	0.724822446	0.04118508	0.041161818	0.957394697	0.022732982	0.022137656	5.671098094	0.115351933	1.081051333	0.102583583	0.101925604	0.077934024	0.095554027	0.092874845	0.407578219	0.175350098	5.679391767	0.265854592	1.004243052	0.165870262	0.083675058	172	185	0.486902929	0.07945007	0.996759703	1.059967657	0.172959535	1.317348503	0.163174351	1.242819527	NO
CTRL	1617	191	1182	A	WT	WT	1	NAN	NAN	NAN	NAN	NAN	x	D06	6	D	1	1	1	1	1	18454	14551	5964	4215	-0.710972852	55	5.096134928	5.693156013	0.145498415	5.436722256	0.201940801	0.952219977	0.02002652	0.019579641	0.703894469	0.043618251	0.043590621	0.951160475	0.018507436	0.018530069	5.693531026	0.145473313	1.053393179	0.080038518	0.080999716	0.052016552	0.076270106	0.076011705	0.358826583	0.146311608	5.701824698	0.217102956	0.980239616	0.136831773	0.065741843	172	185	0.462899493	0.061516855	1.000696787	1.007713164	0.133919664	1.020000829	0.132894626	1.012193613	NO
98	3109	191	1182	A	RAP1.MUTANT	P589.LARGE	1	NAN	NAN	RAP1	NAN	NAN	x	D07	7	D	1	1	1	1	1	20196	16091	5936	4835	-0.538271998	54	5.073699164	5.661618676	0.104432531	5.430686058	0.169623534	0.956477483	0.019584844	0.020881641	0.62608024	0.058357382	0.05829127	0.955069434	0.019307979	0.019675951	5.662020716	0.105142926	1.070577304	0.087035126	0.086494856	0.068198039	0.081138769	0.08086387	0.389394653	0.151533977	5.670314388	0.247671026	0.99515305	0.142054142	0.070369485	182	185	0.477812926	0.066144496	0.995210282	1.044852013	0.144640729	1.122635642	0.138431784	1.074444637	NO
CTRL	1617	191	1182	A	WT	WT	1	NAN	NAN	NAN	NAN	NAN	x	D10	10	D	1	1	1	1	1	19074	15493	5803	4998	-0.191105251	54	5.072280028	5.673224635	0.115558136	5.396285669	0.173589771	0.948281788	0.018196916	0.018131179	0.716808886	0.040800941	0.040778323	0.947627635	0.017684615	0.0174851	5.673379188	0.11597505	1.038308006	0.073720283	0.073906345	0.03759247	0.071507667	0.070651051	0.331199765	0.137238255	5.681672861	0.189476138	0.967147782	0.127758419	0.059709891	172	185	0.449807659	0.055484903	0.997160045	0.979212779	0.120788352	0.919986023	0.123352508	0.939515949	NO
34	2067	191	1182	A	EMS.MUTANT	2P07D07	1	2067	2P07D07	NAN	NAN	NAN	x	D11	11	D	1	1	1	1	1	16500	13226	5155	4207	-0.245732149	55	5.107267153	5.682362621	0.10532205	5.420406322	0.168823345	0.952069961	0.018118791	0.018069959	0.685290453	0.046948695	0.046914246	0.951248696	0.017381925	0.017295163	5.682357209	0.105042863	1.053775239	0.075254007	0.074697206	0.052379182	0.071353541	0.070602035	0.359516469	0.134834189	5.690650882	0.217792842	0.980571192	0.125354353	0.060268997	172	185	0.463231069	0.056044008	0.99873573	1.008434991	0.122005501	0.929256455	0.120984994	0.921483749	NO
CTRL	1617	191	1182	A	WT	WT	1	NAN	NAN	NAN	NAN	NAN	x	E01	1	E	1	1	1	1	2	19968	15458	5794	4198	-0.754963064	55	5.096139149	5.712404255	0.169761056	5.455654786	0.223654214	0.953711124	0.020163107	0.019890418	0.679666229	0.047973652	0.0479369	0.952481344	0.017676696	0.018524023	5.712717045	0.170033182	1.059141172	0.077667376	0.081551627	0.057458365	0.073206283	0.07622714	0.369155782	0.145794789	5.716978598	0.229485963	0.986226113	0.133047788	0.06472029	172	185	0.46888599	0.060495302	1.003356367	1.020745522	0.131695785	1.003062623	0.129019214	0.982676486	NO
48	2504	191	1182	A	SINGLE.SITE	CYC8_G1010A	1	126	Y126	CYC8	NAN	YES	x	E03	3	E	1	1	1	1	2	19814	16732	6039	5556	0.643295723	53	5.059990182	5.639178589	0.089133915	5.226406552	0.139496673	0.926937544	0.015186051	0.016589467	0.504443089	0.074921276	0.074781563	0.928149323	0.014594591	0.015386236	5.639099777	0.089264061	0.962221333	0.052200946	0.05701851	-0.038510779	0.054581932	0.058294729	0.1788793	0.123299485	5.64336133	0.039209481	0.901940228	0.110552484	0.044459572	172	185	0.384600105	0.040234583	0.990436193	0.837258615	0.087589034	0.667122992	0.104614073	0.796794419	NO
27	2012	191	1182	A	EMS.MUTANT	2P01C08	1	2012	2P01C08	NAN	NAN	NAN	x	E04	4	E	1	1	1	1	2	18940	15076	6980	4254	-0.823544975	54	5.094435856	5.67660857	0.144963628	5.265440493	0.208150097	0.925230866	0.019356993	0.020842984	0.600511513	0.057203055	0.057140784	0.92438811	0.017838612	0.018897103	5.676687086	0.144770198	0.948817833	0.06239611	0.065968358	-0.052538456	0.065769482	0.069197374	0.149466603	0.146911179	5.680948639	0.009796784	0.890283937	0.134164178	0.052391348	172	185	0.372943813	0.04816636	0.997032941	0.811883348	0.104856185	0.798638467	0.129151786	0.983686227	NO
CTRL	1617	191	1182	A	WT	WT	1	NAN	NAN	NAN	NAN	NAN	x	E05	5	E	1	1	1	1	2	18905	15042	6856	4258	-0.84471621	55	5.091654479	5.69046455	0.15615883	5.427866518	0.217834757	0.951153571	0.020425557	0.020635292	0.65409602	0.052202689	0.052155347	0.949504454	0.018828851	0.019080289	5.690352901	0.156228703	1.04627009	0.080587422	0.081796495	0.045231545	0.077208692	0.077508214	0.345876497	0.149676676	5.694614454	0.206206678	0.975032837	0.136929675	0.065075919	172	185	0.457692714	0.060850931	0.999431355	0.99637822	0.132469974	1.008959245	0.132951495	1.012626756	NO
43	2182	191	1182	A	EMS.MUTANT	2P19F12	1	2182	2P19F12	NAN	NAN	NAN	x	E06	6	E	1	1	1	1	2	18862	15231	5681	4445	-0.413567988	53	5.059243159	5.643835477	0.101472189	5.410480294	0.175177401	0.956050671	0.020079415	0.02053924	0.641167446	0.055792418	0.055734635	0.95553211	0.018971179	0.019554406	5.643891975	0.101847066	1.072646254	0.084971362	0.086617786	0.07012873	0.079289912	0.080633189	0.393012781	0.151201286	5.648153528	0.253342962	0.997970745	0.138454285	0.068976342	172	185	0.480630621	0.064751354	0.991277246	1.046313102	0.140961035	1.073631521	0.134721657	1.026109221	NO
90	3088	191	1182	A	SINGLE.SITE	RIM8_C436T	1	1480	1P06B05	RIM8	NAN	YES	x	E07	7	E	1	1	1	1	2	17570	14082	5654	4837	-0.427125519	55	5.08374712	5.686123034	0.155152582	5.395121868	0.216113706	0.946433264	0.020984552	0.020625996	0.691859941	0.044770984	0.044741106	0.945374762	0.020013576	0.019572159	5.686090585	0.155652808	1.028903625	0.082412998	0.081568112	0.028493793	0.080208007	0.078436429	0.313582291	0.154157636	5.690352138	0.173912472	0.959930172	0.141410635	0.06506982	172	185	0.442590048	0.060844832	0.998683299	0.963500338	0.132456698	1.008858126	0.137474469	1.047076048	NO
152	3268	191	1182	A	SINGLE.SITE	NAP1_G1034A	2	1523	1P16A09	NAP1	NAN	YES	x	E08	8	E	1	1	1	1	2	18954	15413	6040	5115	-0.247476869	54	5.079874325	5.681777441	0.124527151	5.414916552	0.181698762	0.949936548	0.019858	0.019819087	0.693374442	0.045155254	0.045124602	0.948488317	0.019280275	0.019005205	5.682159402	0.124602677	1.041944799	0.081943215	0.080944802	0.041088966	0.078805986	0.077001575	0.337930302	0.149299856	5.686420955	0.198260483	0.971271368	0.136552855	0.064383195	172	185	0.453931244	0.060158207	0.997993358	0.988189656	0.130961943	0.997473308	0.132527134	1.009394606	NO
CTRL	1617	191	1182	A	WT	WT	1	NAN	NAN	NAN	NAN	NAN	x	E09	9	E	1	1	1	1	2	19398	15276	6773	4040	-0.840254491	54	5.087773467	5.67860304	0.142506449	5.411680301	0.211976221	0.950234104	0.021062617	0.021435031	0.66544067	0.050152024	0.050110039	0.948863028	0.019734047	0.020187927	5.678520668	0.142111845	1.043535793	0.083800404	0.085644786	0.042614748	0.080311338	0.081507264	0.340860539	0.157506604	5.682782221	0.201190719	0.972654969	0.144759603	0.068452878	172	185	0.455314845	0.064227889	0.997354743	0.991201698	0.139821475	1.064952045	0.141062586	1.074404984	NO
76	2915	191	1182	A	SINGLE.SITE	ADE6_G1055A	1	1565	1P01D03	ADE6	NAN	YES	x	E10	10	E	1	1	1	1	2	13309	9231	2452	2236	-0.745610237	58	5.157020253	5.744008055	0.071123664	5.687167196	0.094666793	0.990063966	0.009785701	0.010003948	0.859341968	0.022757976	0.022754048	0.990138481	0.009754618	0.009883594	5.743889049	0.071365926	1.250680625	0.057962556	0.057562996	0.223687903	0.045907599	0.046172114	0.663634724	0.076658829	5.748150602	0.523964905	1.152797504	0.063911827	0.041735403	172	185	0.63545738	0.037510415	1.008827198	1.38336459	0.08165863	0.621953999	0.059029001	0.449595142	NO
148	3260	191	1182	A	SINGLE.SITE	FTR1_G265A	2	2100	2P11C10	FTR1	NAN	YES	x	E12	12	E	1	1	1	1	2	19712	15716	6712	4468	-0.79309136	54	5.076702498	5.669709609	0.166460101	5.285341219	0.227652588	0.930633271	0.021029952	0.022301688	0.632478909	0.052587237	0.052538842	0.929615494	0.019079433	0.020613886	5.669861746	0.167133521	0.967553921	0.069864201	0.075822855	-0.032984123	0.07219275	0.077470419	0.190344758	0.162093703	5.674123299	0.050674939	0.906577689	0.149346702	0.060753569	172	185	0.389237565	0.05652858	0.995835062	0.847354176	0.123060395	0.937291066	0.145228994	1.106138487	NO
178	2007	191	1182	A	CHR2SNP.69593(T)	POLYMORPHISM	3	NAN	NAN	NAN	NAN	NAN	x	F01	1	F	1	1	1	1	2	20743	16003	6909	3909	-0.881982808	54	5.090909206	5.65162686	0.176306432	5.362365592	0.248359631	0.947479842	0.020708758	0.021113339	0.690831315	0.045411442	0.045380265	0.947624661	0.019066439	0.019661691	5.651637491	0.176086475	1.038295482	0.080353758	0.082667527	0.037580409	0.077053798	0.079081206	0.331176509	0.153510648	5.656983262	0.189086834	0.96696587	0.141080883	0.065910688	172	185	0.449625747	0.0616857	0.992826906	0.978816764	0.134287232	1.022800417	0.137193433	1.044935533	NO
5	103	190	1180	A	EMS.MUTANT	Y103	1	103	Y103	NAN	NAN	NAN	a	F02	2	F	1	1	1	1	2	17141	14562	5982	5122	0.027328845	53	5.037993506	5.632520053	0.104605962	5.146514074	0.209995608	0.912072869	0.025182368	0.025776651	0.515410931	0.070423529	0.070307453	0.910993633	0.023262039	0.024538084	5.63261758	0.104772304	0.904163152	0.073413812	0.078476729	-0.100745457	0.081257638	0.0853657	0.044721749	0.194066322	5.63796335	-0.097367926	0.850600245	0.181636557	0.063721387	170	171	0.334460919	0.05962548	0.99905816	0.890672953	0.158783282	1.012167116	0.178273385	1.136407154	NO
CTRL	1617	191	1182	A	WT	WT	1	NAN	NAN	NAN	NAN	NAN	x	F03	3	F	1	1	1	1	2	18234	14172	5942	3812	-0.816399418	55	5.089546584	5.697873329	0.16676729	5.436036896	0.226013981	0.951547328	0.021097042	0.020815507	0.657754667	0.05156181	0.051516188	0.949609087	0.018938529	0.01930115	5.698238109	0.167138896	1.046717423	0.080784694	0.082912074	0.045659004	0.077351726	0.078481236	0.346694721	0.151593949	5.70358388	0.204605046	0.97427227	0.139164184	0.066032027	172	185	0.456932147	0.061807038	1.001005531	0.994722497	0.134551381	1.024812313	0.135265244	1.030249457	NO
160	R120	191	1182	A	RAP1.MUTANT	PLATE	1	NAN	NAN	RAP1	NAN	NAN	x	F04	4	F	1	1	1	1	2	7229	5923	2679	1846	-0.580204787	52	4.959033848	5.562577737	0.151727393	5.115324126	0.173870637	0.91726662	0.015356596	0.015471255	0.861801014	0.009971206	0.009970875	0.917023587	0.015374308	0.015391462	5.562618397	0.15166287	0.923688169	0.050683916	0.051869365	-0.079380746	0.055047572	0.055491118	0.091876022	0.122360535	5.567964168	-0.050213653	0.867539046	0.10993077	0.040427796	182	185	0.350198923	0.036202808	0.977246553	0.765793534	0.079166081	0.614451161	0.103377839	0.802371831	NO
104	3176	191	1182	A	RAP1.MUTANT	F548	1	NAN	NAN	RAP1	NAN	NAN	x	F05	5	F	1	1	1	1	2	23126	19650	9227	6637	-0.529235346	52	5.023380419	5.603776401	0.100620149	5.341964456	0.153723308	0.951621447	0.01712427	0.018794273	0.640410334	0.055535962	0.055478972	0.951731367	0.016849106	0.017810718	5.603765458	0.100831837	1.055870233	0.073230962	0.075918046	0.054365292	0.069364557	0.072184904	0.363290961	0.136521626	5.609111229	0.221201286	0.98221273	0.124091862	0.059865706	182	185	0.464872607	0.055640717	0.984468371	1.016554916	0.121671709	0.944360545	0.119690247	0.928981337	NO
134	3235	191	1182	A	SINGLE.SITE	ADE5_G1592A	2	1572	1P03E05	ADE5	NAN	YES	x	F06	6	F	1	1	1	1	2	13524	9870	3161	2992	-0.20890322	57	5.145959909	5.730181678	0.067633708	5.657885831	0.085064444	0.987288007	0.007349754	0.007272008	0.848085815	0.024292806	0.024288029	0.9872769	0.007117103	0.007120965	5.730201934	0.06769744	1.23406395	0.041120337	0.040614041	0.210312748	0.033149949	0.033012915	0.641257147	0.055311247	5.735547705	0.499167472	1.136803524	0.042881482	0.02731642	172	185	0.6194634	0.023091431	1.006615331	1.348546354	0.050269096	0.382875211	0.037276506	0.283916982	NO
CTRL	1617	191	1182	A	WT	WT	1	NAN	NAN	NAN	NAN	NAN	x	F07	7	F	1	1	1	1	2	18095	15048	6096	5197	-0.135364904	55	5.08224148	5.690923136	0.132331478	5.424453662	0.184428621	0.95025458	0.018673617	0.018343539	0.731174803	0.038496351	0.038477351	0.949275834	0.017829362	0.017660339	5.691229808	0.132528709	1.045293946	0.075531305	0.075977346	0.044298134	0.072687061	0.071953582	0.344088686	0.139277189	5.696575578	0.201999011	0.973037342	0.126847424	0.060031199	172	185	0.455697219	0.05580621	0.999775542	0.992034109	0.121487825	0.925313571	0.122463355	0.932743706	NO
25	1600	191	1182	A	EMS.MUTANT	1P12F03	1	1600	1P12F03	NAN	NAN	NAN	x	F08	8	F	1	1	1	1	2	12892	8896	1877	1808	-0.726581653	58	5.186689528	5.778432365	0.051047566	5.755491822	0.085252146	0.995814931	0.008756059	0.009204446	0.708976878	0.049639424	0.049598712	0.995746616	0.008203859	0.008886009	5.778373936	0.05096517	1.284344536	0.050263915	0.054271711	0.250248497	0.039192275	0.042307735	0.707490362	0.069174502	5.783719706	0.565400687	1.180424117	0.056744738	0.038622848	172	185	0.663083993	0.03439786	1.015069742	1.443506591	0.074882727	0.570345244	0.05187557	0.395110939	NO
142	3251	191	1182	A	SINGLE.SITE	NAM7_G2462A	2	2058	2P06D08	NAM7	NAN	YES	x	F09	9	F	1	1	1	1	2	18744	14612	6161	4172	-0.935250497	56	5.13508186	5.725173842	0.173141106	5.541541171	0.204756082	0.964637217	0.019617982	0.020521604	0.697314705	0.046692471	0.046658582	0.963085365	0.018383613	0.019073805	5.724878328	0.173223364	1.107502605	0.087553068	0.091166321	0.102107576	0.079120505	0.081494883	0.45207926	0.150013586	5.730224099	0.309989585	1.027006057	0.137583821	0.072537476	172	185	0.509665934	0.068312488	1.005681014	1.109521783	0.148713478	1.132678098	0.134033851	1.020870536	NO
60	2699	191	1182	A	SINGLE.SITE	CHD1_G1277A	1	54	Y54	CHD1	NAN	YES	x	F10	10	F	1	1	1	1	2	18615	15065	6321	4558	-0.721341312	55	5.085173853	5.705519046	0.172819819	5.454349322	0.218035734	0.954829328	0.019799686	0.020052159	0.721308219	0.040928986	0.040906154	0.953976988	0.018522023	0.019012996	5.70533057	0.173038648	1.065721813	0.081956411	0.084797081	0.063652328	0.076969516	0.078702674	0.380851728	0.149834143	5.710676341	0.238762053	0.990759404	0.137404378	0.067462421	172	185	0.473419281	0.063237433	1.002250291	1.03061431	0.137665291	1.048529444	0.133575955	1.017382966	NO
CTRL	1617	191	1182	A	WT	WT	1	NAN	NAN	NAN	NAN	NAN	x	F11	11	F	1	1	1	1	2	19866	15857	6810	4702	-0.733111097	55	5.093009705	5.702434414	0.161224083	5.441285779	0.209325842	0.951395985	0.019772973	0.019507604	0.70412643	0.043362104	0.043334957	0.95013606	0.018565312	0.018434812	5.702418359	0.161063704	1.04897596	0.080140826	0.07930124	0.04781441	0.076215178	0.075058262	0.35081566	0.144395733	5.707764129	0.208725985	0.97623165	0.131965969	0.062875117	172	185	0.458891526	0.058650128	1.001739184	0.998987985	0.127678917	0.972468102	0.127808261	0.973453252	NO
171	880	171	880	A	NULL	NULL	1	NAN	NAN	NAN	NAN	NAN	a	F12	12	F	1	1	1	1	2	19491	15907	5590	5388	-0.224155072	53	5.05837337	5.631616235	0.100251505	2.918554531	0.198304524	0.518235839	0.032055748	0.033336848	0.280528065	0.042209512	0.042184472	0.517664	0.031425494	0.033035196	5.631599407	0.100196041	0.518444716	0.004630204	0.004671203	-0.65692188	0.008942542	0.008995779	-3.031117285	0.250298332	5.636945177	-3.17320696	0.51597274	0.237868567	0.003851227	170	171	-0.000166586	-0.00024468	0.998877738	-0.00044362	-0.000651584	-0.004153537	1.468788883	9.362823253	NO
143	3253	191	1182	A	SINGLE.SITE	IRA2_G7496A	1	2157	2P17B12	IRA2	NAN	YES	x	G01	1	G	1	1	1	1	2	19710	15716	7241	6011	-0.375380927	52	5.0179043	5.574268617	0.181053083	5.225965398	0.267530477	0.937535689	0.019069888	0.019118194	0.594357693	0.061564668	0.061487063	0.935988837	0.015471658	0.016234271	5.574165281	0.181785701	0.991458204	0.059341152	0.062872516	-0.008578486	0.060058586	0.062854877	0.240184324	0.127873868	5.573967715	0.094545101	0.924821119	0.114861875	0.04882077	172	185	0.407480996	0.044595782	0.978257291	0.887069374	0.097083183	0.739435304	0.109442605	0.833570998	NO
61	2700	191	1182	A	SINGLE.SITE	CIT2_C-385T	1	103	Y103	CIT2	NAN	YES	x	G02	2	G	1	1	1	1	2	17857	14597	6290	4313	-0.705094192	55	5.099010399	5.698762362	0.15537532	5.440808364	0.214950113	0.951892642	0.020414474	0.020805255	0.682152883	0.047333042	0.047297741	0.950328845	0.019364415	0.019623534	5.699522888	0.155207838	1.049804535	0.082493313	0.085048612	0.048603989	0.079289976	0.080092479	0.352323233	0.154627554	5.699325322	0.20668401	0.975259744	0.141615561	0.067335023	172	185	0.457919621	0.063110034	1.000258134	0.996872187	0.13738795	1.046417073	0.137819022	1.049700339	NO
179	2008	191	1182	A	CHR2SNP.69593(PolyG_T)	POLYMORPHISM	2	NAN	NAN	NAN	NAN	NAN	x	G03	3	G	1	1	1	1	2	19104	15358	6111	4776	-0.526686025	55	5.085016047	5.699679062	0.149443582	5.451368821	0.203413232	0.953538116	0.019766638	0.019557313	0.692517124	0.045795735	0.04576376	0.952095583	0.018711121	0.018454873	5.699749656	0.149055895	1.057456332	0.081104133	0.080980157	0.055866334	0.077433891	0.075854708	0.366139145	0.145210524	5.699552089	0.220499922	0.98187449	0.132198531	0.063731896	172	185	0.464534366	0.059506908	1.000297933	1.011272216	0.129544091	0.986674223	0.128100119	0.97567619	NO
CTRL	1617	191	1182	A	WT	WT	1	NAN	NAN	NAN	NAN	NAN	x	G04	4	G	1	1	1	1	2	18148	14655	5463	4637	-0.354110214	55	5.093724894	5.706804803	0.14851066	5.452986376	0.201828648	0.952994356	0.019845686	0.019209372	0.69457113	0.045283348	0.045252433	0.951362568	0.017988318	0.018169638	5.706986459	0.149141413	1.054268779	0.078052637	0.078938384	0.052847426	0.074066439	0.074354845	0.36040695	0.142363014	5.706788893	0.214767727	0.979118948	0.129351021	0.062002701	172	185	0.461778824	0.057777713	1.001568026	1.005273515	0.125779705	0.958002727	0.125119883	0.952977188	NO
105	3177	191	1182	A	RAP1.MUTANT	F548	1	NAN	NAN	RAP1	NAN	NAN	x	G06	6	G	1	1	1	1	2	21382	18249	8085	7100	0.198208711	51	4.99363883	5.555459635	0.106089722	5.215445881	0.144575154	0.93764156	0.012584175	0.013184636	0.719509208	0.039264501	0.039244342	0.937516757	0.011993966	0.01257128	5.555427961	0.106344929	0.997368152	0.046547343	0.049821808	-0.002635318	0.046733751	0.049342555	0.252132662	0.100127034	5.555230395	0.106493439	0.929930089	0.087115041	0.037472353	182	185	0.412589966	0.033247365	0.975011618	0.902226442	0.072703299	0.564289987	0.080582098	0.625441642	NO
CTRL	1617	191	1182	A	WT	WT	1	NAN	NAN	NAN	NAN	NAN	x	G08	8	G	1	1	1	1	2	19383	15272	6398	4699	-0.636819993	55	5.082666273	5.694946359	0.14996147	5.43434691	0.210020314	0.951850498	0.020157763	0.020135408	0.694693746	0.045155254	0.045124602	0.950441207	0.018608181	0.019023833	5.695292527	0.150163786	1.050288037	0.080532341	0.082309482	0.049064447	0.076727896	0.077621533	0.353201907	0.149516085	5.695094961	0.207562684	0.975677717	0.136504092	0.064961689	172	185	0.458337594	0.060736701	0.999515686	0.997782097	0.1322213	1.00706522	0.132515206	1.009303758	NO
190	1180	190	1180	A	GFP.MATA	GFP.MATA	1	NAN	NAN	NAN	NAN	NAN	a	G09	9	G	1	1	1	1	2	18834	14700	5942	4151	-0.731595654	55	5.089620099	5.696738086	0.151572035	5.188495379	0.227243783	0.907816886	0.023560016	0.024300209	0.576100864	0.058229116	0.058163438	0.905549954	0.022269224	0.022766177	5.697256068	0.15138187	0.88731008	0.067087825	0.068687074	-0.119560775	0.075928868	0.076841705	0.002152162	0.1772442	5.697058502	-0.143487061	0.83478824	0.164232207	0.055018785	172	185	0.317448116	0.050793797	0.999860297	0.691071497	0.110576008	0.842203572	0.16000661	1.218692386	NO
169	R65	191	1182	A	RAP1.MUTANT	PLATE	1	NAN	NAN	RAP1	NAN	NAN	x	G10	10	G	1	1	1	1	2	10560	8684	4554	2365	-0.796921047	52	4.980151262	5.588179795	0.146204557	5.131939295	0.207962968	0.91611422	0.018065702	0.0195535	0.728885373	0.033504442	0.033491914	0.915783541	0.017281721	0.01887214	5.588243176	0.146433274	0.919597344	0.057069182	0.06332075	-0.083819375	0.061319436	0.067650011	0.082178842	0.150830067	5.58804561	-0.063460381	0.862699595	0.137818074	0.05001658	182	185	0.345359472	0.045791592	0.980771094	0.75521092	0.100134245	0.77719653	0.132591098	1.029111881	NO
28	2013	191	1182	A	EMS.MUTANT	2P01D04	1	2013	2P01D04	NAN	NAN	NAN	x	G11	11	G	1	1	1	1	2	22636	18854	6472	5482	0.003276418	53	5.037933309	5.62214198	0.078846464	5.368908586	0.122736937	0.954582522	0.013757023	0.01438102	0.740309797	0.038112293	0.038093856	0.954399294	0.0138212	0.014035107	5.621990192	0.078693334	1.067593879	0.061210455	0.062021465	0.065407405	0.057531085	0.058018922	0.384154159	0.10922893	5.621792626	0.238514936	0.99063809	0.096216937	0.047228653	172	185	0.473297967	0.043003664	0.986650785	1.030350215	0.093617209	0.713036668	0.090859601	0.692033308	NO
64	2794	191	1182	A	SINGLE.SITE	SDS23_G676A	1	1487	1P07H05	SDS23	NAN	YES	x	H01	1	H	1	1	1	1	2	22223	17123	7618	4787	-0.970211067	54	5.08975504	5.65620173	0.204278369	5.424013814	0.279455892	0.957152422	0.021577775	0.021428669	0.66260849	0.05207451	0.052027515	0.95647354	0.018625393	0.019171826	5.656825769	0.204863976	1.076879234	0.08475766	0.086712172	0.07406726	0.078322176	0.079881665	0.400374767	0.150255785	5.653581547	0.255117776	0.998855722	0.13500662	0.067378233	172	185	0.481515599	0.063153244	0.992229889	1.048239661	0.137482016	1.047133531	0.131155137	0.998944774	NO
CTRL	1617	191	1182	A	WT	WT	1	NAN	NAN	NAN	NAN	NAN	x	H02	2	H	1	1	1	1	2	20307	16294	6425	4790	-0.657721884	55	5.089678474	5.706491611	0.159564136	5.46038284	0.209215368	0.953925007	0.020340838	0.020444157	0.691130011	0.046051938	0.046019424	0.952740124	0.01927852	0.019302893	5.706694441	0.15972683	1.060274273	0.084713118	0.084622932	0.058527622	0.080116094	0.079249564	0.371179446	0.150979705	5.703450218	0.225922455	0.984495751	0.13573054	0.065790435	172	185	0.467155628	0.061565447	1.000982073	1.016978595	0.134025447	1.020806523	0.131787874	1.003764021	NO
31	2038	191	1182	A	EMS.MUTANT	2P04A04	1	2038	2P04A04	NAN	NAN	NAN	x	H03	3	H	1	1	1	1	2	15093	10390	2914	2704	-0.587796593	58	5.168734627	5.744305491	0.083077534	5.72906917	0.111855635	0.997380356	0.009172219	0.009402975	0.731372217	0.046308146	0.046275087	0.997139422	0.008385115	0.008692101	5.744236595	0.083162763	1.292936494	0.051912746	0.053637443	0.256915983	0.040378351	0.041558469	0.718382106	0.067625482	5.740992373	0.573125115	1.185702045	0.052376317	0.035925956	172	185	0.668361921	0.031700968	1.007570896	1.454996423	0.069011703	0.52562852	0.047430841	0.361257603	NO
100	3161	191	1182	A	SINGLE.SITE	FTR1_G853A	1	2200	2P01A08	FTR1	NAN	YES	x	H04	4	H	1	1	1	1	2	19429	15893	6524	5258	-0.412474902	55	5.081508492	5.680922637	0.141463306	5.389667447	0.208286443	0.945192497	0.021041114	0.02058608	0.644263797	0.0529718	0.052922337	0.943762957	0.019052652	0.019256194	5.681302933	0.142054188	1.022276262	0.077657252	0.080148643	0.02203177	0.07577456	0.077134437	0.30097797	0.153396267	5.678058711	0.155720979	0.951635071	0.138147102	0.062422168	172	185	0.434294948	0.05819718	0.996525745	0.945442245	0.126692868	0.964957841	0.134003815	1.020641764	NO
170	629	170	629	A	WT	WT	1	NAN	NAN	NAN	NAN	NAN	a	H05	5	H	1	1	1	1	2	19674	15840	4593	4161	-0.066581252	53	5.060798563	5.633413913	0.072206841	5.236287798	0.17126477	0.928944318	0.024173637	0.024309207	0.232666769	0.123597797	0.122974126	0.92901924	0.02208246	0.022723073	5.633709471	0.073017371	0.965377916	0.080388336	0.082479406	-0.035235631	0.083122271	0.084720145	0.185682053	0.177148111	5.630465249	0.040425062	0.902429381	0.161898946	0.065188158	170	171	0.386290055	0.061092252	0.997729482	1.028694487	0.162689311	1.037066172	0.158151242	1.008138164	NO
CTRL	1617	191	1182	A	WT	WT	1	NAN	NAN	NAN	NAN	NAN	x	H06	6	H	1	1	1	1	2	19603	15663	7076	4278	-0.783658991	54	5.081173362	5.674444071	0.154009897	5.409385242	0.232476086	0.951674458	0.022111824	0.02293907	0.648906666	0.05335638	0.053305832	0.950298952	0.020207871	0.021469053	5.674863732	0.15448612	1.049675976	0.086415045	0.092166795	0.048481523	0.082671774	0.087037653	0.352089473	0.167608355	5.67161951	0.206832482	0.975330345	0.152359189	0.072454134	172	185	0.457990221	0.068229145	0.995395635	0.997025881	0.148532044	1.131296208	0.148975114	1.134670854	NO
2	89	190	1180	A	EMS.MUTANT	Y89	1	89	Y89	NAN	NAN	NAN	a	H08	8	H	1	1	1	1	2	15994	13369	4994	4359	0.298707091	52	5.02558843	5.597452747	0.084156779	5.290760056	0.179478445	0.945287248	0.02188844	0.021228014	0.25418087	0.123468015	0.122846295	0.945017935	0.018864906	0.018686274	5.597694161	0.084916967	1.027429226	0.077188596	0.077418414	0.027059785	0.075027434	0.074664549	0.310791898	0.146723864	5.594449939	0.165534907	0.956091354	0.131474699	0.059993112	170	171	0.439952028	0.055897206	0.991347498	1.171596887	0.148854848	0.948878118	0.127052956	0.809901536	NO
CTRL	1617	191	1182	A	WT	WT	1	NAN	NAN	NAN	NAN	NAN	x	H10	10	H	1	1	1	1	2	19033	15202	5881	4480	-0.620602227	55	5.105867755	5.707556072	0.160234045	5.454665764	0.218304502	0.952825846	0.020404694	0.020287466	0.665117456	0.050408333	0.050365703	0.951327491	0.018910291	0.018893787	5.708062925	0.160744625	1.054116706	0.081694599	0.082606373	0.05270317	0.078082216	0.077483138	0.360132652	0.149018992	5.704818702	0.214875662	0.979170687	0.133769826	0.064127718	172	185	0.461830564	0.05990273	1.001222248	1.00538615	0.13040578	0.993237284	0.129707157	0.987916219	NO
125	3221	191	1182	A	SINGLE.SITE	ADE5_G713A	1	1611	1P15H09	ADE5	NAN	YES	x	H12	12	H	1	1	1	1	2	14945	10152	3921	2263	-1.093842193	58	5.149479193	5.752997477	0.093351182	5.692008354	0.115682938	0.986704896	0.01374383	0.013931164	0.919779054	0.011633212	0.011632688	0.986322503	0.013780132	0.01386513	5.75303935	0.093306188	1.228604122	0.079001883	0.077851715	0.205878665	0.064351357	0.063712499	0.633793761	0.106818565	5.749795128	0.48853677	1.130067409	0.0915694	0.057714841	172	185	0.612727285	0.053489852	1.00911582	1.333882108	0.116445209	0.88690642	0.087297977	0.664906153	NO
CTRL	1617	191	1182	A	WT	WT	1	NAN	NAN	NAN	NAN	NAN	x	A01	1	A	2	1	1	1	3	22548	17137	7530	4482	-0.92651325	53	5.087956626	5.648561493	0.18976603	5.363348663	0.25759302	0.950425459	0.020945222	0.021026822	0.696086761	0.045027163	0.04499677	0.950110948	0.018928078	0.01957403	5.648365783	0.189894778	1.048868118	0.081262735	0.08372692	0.0477116	0.07756295	0.079408129	0.350619276	0.15248418	5.653730614	0.208127694	0.975946679	0.1327282	0.063200458	172	185	0.458606556	0.058975469	0.992256051	0.998367616	0.128387171	0.977862528	0.128597091	0.979461385	NO
173	2002	191	1182	A	CHR2SNP.69593(T_G)	POLYMORPHISM	1	NAN	NAN	NAN	NAN	NAN	x	A02	2	A	2	1	1	1	3	20664	15991	7184	4198	-0.912923182	54	5.072724897	5.663112673	0.175660676	5.400598403	0.255098317	0.951503042	0.022359088	0.023050191	0.640627295	0.054894855	0.054839813	0.950493612	0.020018329	0.021164228	5.663505645	0.175569687	1.050513685	0.086056162	0.091372499	0.049279269	0.081947112	0.086086082	0.353611716	0.16591115	5.668870476	0.211120133	0.977373706	0.14615517	0.069802472	172	185	0.460033583	0.065577483	0.994913167	1.001474196	0.142759485	1.087329436	0.142549339	1.085728859	NO
58	2691	191	1182	A	EXTRA.MUTATION	NAR1_G536A_G624T	1	1513	1P12H01	NAR1	NAN	YES	x	A03	3	A	2	1	1	1	3	19623	15929	6243	5327	-0.255422505	54	5.070900849	5.683785252	0.143728797	5.377834224	0.210514776	0.943568505	0.022065527	0.021292757	0.654873078	0.050792811	0.050749198	0.941540641	0.020419086	0.020182747	5.683779394	0.143880025	1.013274532	0.08203003	0.082538155	0.013187197	0.080968968	0.080122234	0.283599447	0.160738818	5.689144225	0.141107864	0.945080104	0.140982838	0.062779366	172	185	0.427739981	0.058554378	0.998471305	0.931172351	0.127470473	0.97088048	0.136892459	1.042643157	NO
149	3263	191	1182	A	SINGLE.SITE	NAM7_G2463	1	2142	2P15E04	NAM7	NAN	YES	x	A04	4	A	2	1	1	1	3	19669	15494	6467	4768	-0.761442331	56	5.129227178	5.730547706	0.158239845	5.551403027	0.1912652	0.965833444	0.019131288	0.019657248	0.718812668	0.043105963	0.043079294	0.964060153	0.018600117	0.018576847	5.730581847	0.158306335	1.112152871	0.088781497	0.089360401	0.10629766	0.080009935	0.079645266	0.459702113	0.145925338	5.735946678	0.31721053	1.030826891	0.126169358	0.067001571	172	185	0.513486767	0.062776582	1.006685353	1.11783958	0.136662039	1.040888161	0.122255502	0.931160588	NO
CTRL	1617	191	1182	A	WT	WT	1	NAN	NAN	NAN	NAN	NAN	x	A05	5	A	2	1	1	1	3	19397	15096	6320	4315	-0.768509013	55	5.086721719	5.703985694	0.171704089	5.449425941	0.226258218	0.952837402	0.020297497	0.020574492	0.69234986	0.045667636	0.045635928	0.951684501	0.018575167	0.019347953	5.703759057	0.171930367	1.055666469	0.080484735	0.084658557	0.054172292	0.0763302	0.079339688	0.36292447	0.152295285	5.709123888	0.220432887	0.981842174	0.132539305	0.063891897	172	185	0.46450205	0.059666909	1.001977828	1.011201865	0.129892407	0.989327178	0.128453489	0.978367635	NO
185	3139	185	3139	A	NULL	NULL	1	NAN	NAN	NAN	NAN	NAN	x	A06	6	A	2	1	1	1	3	19665	15335	6012	5760	-0.646178717	54	5.098310683	5.656597401	0.200295964	2.979092901	0.206826354	0.527573108	0.03071672	0.03274619	0.471170013	0.009971206	0.009970875	0.52741662	0.030704421	0.032695393	5.656665892	0.200365615	0.519923706	0.004853956	0.004922377	-0.654073198	0.009324199	0.009456856	-2.954851766	0.244389431	5.662030723	-3.097343349	0.517248807	0.22463345	0.00392359	172	185	-9.13E-05	-0.000301399	0.993712759	-0.000198793	-0.000656132	-0.00499744	3.300579189	25.13890348	NO
177	2006	191	1182	A	CHR2SNP.69593(PolyG_T)	POLYMORPHISM	1	NAN	NAN	NAN	NAN	NAN	x	A07	7	A	2	1	1	1	3	19542	15664	6443	4889	-0.591955178	55	5.080772317	5.69262487	0.148628023	5.446619483	0.21429466	0.953736725	0.021871759	0.021729162	0.643430537	0.054510212	0.054456318	0.952092705	0.020178923	0.02032171	5.692724796	0.148677741	1.057443773	0.087822945	0.088991185	0.055854461	0.083008511	0.08332779	0.366116625	0.159579187	5.698089627	0.223625042	0.983383443	0.139823207	0.06761868	172	185	0.466043319	0.063393692	1.000041264	1.014557145	0.138005461	1.051120354	0.136025321	1.03603859	NO
109	3187	191	1182	A	SINGLE.SITE	DSE3_G249A	2	2182	2P19F12	DSE3	C	NO	x	A08	8	A	2	1	1	1	3	16804	13625	5287	4587	-0.040418346	54	5.071311522	5.661697237	0.135294233	5.378041597	0.184249879	0.946550307	0.016882854	0.017494031	0.763379064	0.032352709	0.032341428	0.946232014	0.016662382	0.016970565	5.661524215	0.135256446	1.032462617	0.06929257	0.072502264	0.031946839	0.067000326	0.068935642	0.320286001	0.136108365	5.666889046	0.177794418	0.961719913	0.116352385	0.053747557	172	185	0.44437979	0.049522569	0.994565417	0.967396531	0.107808597	0.821125551	0.111441992	0.848799354	NO
CTRL	1617	191	1182	A	WT	WT	1	NAN	NAN	NAN	NAN	NAN	x	A09	9	A	2	1	1	1	3	20725	16222	6245	4571	-0.671061745	55	5.096891614	5.704666043	0.163225578	5.447623098	0.226229029	0.952156043	0.02172291	0.021214465	0.663131135	0.05066465	0.050621366	0.951024814	0.019731771	0.019878454	5.704838367	0.163562946	1.052806183	0.085485691	0.087045598	0.051459154	0.081372572	0.081536289	0.357765716	0.157399312	5.710203198	0.215274133	0.979361748	0.137643332	0.066010931	172	185	0.462021625	0.061785942	1.002167252	1.005802081	0.134505455	1.024462516	0.133729546	1.01855279	NO
97	3104	191	1182	A	RAP1.MUTANT	P589.SMALL	1	NAN	NAN	RAP1	NAN	NAN	x	A10	10	A	2	1	1	1	3	22527	17474	6945	5193	-0.698268239	54	5.084756611	5.691811484	0.16060401	5.447522376	0.223185805	0.953586299	0.022445355	0.022580479	0.641135135	0.054894855	0.054839813	0.951527559	0.021100577	0.021042474	5.692750286	0.161400475	1.054984655	0.091617635	0.091942936	0.053526222	0.086846295	0.086152692	0.361697179	0.165602531	5.698115117	0.219205596	0.981250909	0.145846551	0.070220554	182	185	0.463910785	0.065995566	1.000089654	1.014451663	0.144315057	1.120107925	0.142259175	1.104151105	NO
70	2802	191	1182	A	SINGLE.SITE	BSC5_G583A	1	333	Y333	BSC5	NAN	YES	x	A11	11	A	2	1	1	1	3	19842	16199	6250	5294	-0.336803047	55	5.081365335	5.697157385	0.144243526	5.447526241	0.200115877	0.952645089	0.02135398	0.020594018	0.704145048	0.043618251	0.043590621	0.951364184	0.019905651	0.019742085	5.697274423	0.144280798	1.054275792	0.086338842	0.086016249	0.052854076	0.082029266	0.080812052	0.360419597	0.155125769	5.702639254	0.217928014	0.980636186	0.135369789	0.065093106	172	185	0.463296062	0.060868118	1.000839745	1.008576479	0.13250739	1.009244223	0.131380607	1.000662066	NO
40	2154	191	1182	A	EMS.MUTANT	2P16H09	1	2154	2P16H09	NAN	NAN	NAN	x	A12	12	A	2	1	1	1	3	20166	16691	6842	6081	-0.087089656	55	5.086509301	5.696628939	0.150436904	5.310049357	0.223750443	0.929057762	0.025385914	0.02360736	0.596617412	0.058357382	0.05829127	0.927404845	0.022941208	0.022240628	5.696634688	0.150414887	0.959536917	0.082707359	0.081042834	-0.041304489	0.085915469	0.083207913	0.173057481	0.176274057	5.701999519	0.030565898	0.898479121	0.156518077	0.06240328	172	185	0.381138998	0.058178291	1.000727469	0.829723928	0.126651748	0.964644652	0.152643239	1.162609176	NO
57	2690	191	1182	A	SINGLE.SITE	NAR1_G536A	1	1513	1P12H01	NAR1	NAN	YES	x	B01	1	B	2	1	1	1	3	20191	15876	6415	4947	-0.608610595	55	5.087757801	5.697458639	0.162324355	5.405430034	0.230983709	0.946387698	0.023830028	0.022805785	0.62485966	0.056433589	0.056373794	0.944455049	0.020990263	0.021285169	5.696905728	0.161886152	1.025111749	0.086634801	0.08851474	0.02480163	0.084421737	0.085099525	0.306390128	0.168493732	5.708135474	0.167956535	0.957197704	0.154944067	0.070873823	172	185	0.439857581	0.066648834	1.001804357	0.957551869	0.145091771	1.105093328	0.151523668	1.154081949	NO
CTRL	1617	191	1182	A	WT	WT	1	NAN	NAN	NAN	NAN	NAN	x	B03	3	B	2	1	1	1	3	19288	15345	5850	4974	-0.276290743	54	5.068507743	5.671259878	0.127246794	5.422954881	0.186426263	0.952948707	0.020456031	0.020487502	0.718651213	0.04131313	0.04128965	0.951283592	0.019590185	0.019811915	5.671977055	0.127219556	1.053926442	0.085122941	0.087162972	0.052522657	0.080800675	0.081451508	0.359789365	0.157292923	5.683206801	0.221355772	0.982287265	0.143743258	0.069356854	172	185	0.464947142	0.065131865	0.997429259	1.012170811	0.141789393	1.079940718	0.140084451	1.06695501	NO
78	2917	191	1182	A	SINGLE.SITE	ADE6_G2801A	1	2021	2P02B11	ADE6	NAN	YES	x	B04	4	B	2	1	1	1	3	18691	13209	3761	3476	-0.551219274	56	5.155731501	5.731180463	0.125375607	5.60549467	0.157210459	0.974649549	0.013994392	0.014479267	0.748883847	0.039392531	0.039372174	0.973899536	0.013929237	0.013630355	5.731998391	0.125406543	1.161131265	0.07177587	0.071153407	0.149394756	0.062284204	0.060756619	0.536646127	0.107588274	5.743228137	0.398212534	1.075632764	0.094038609	0.054152188	172	185	0.55829264	0.0499272	1.007963283	1.215380123	0.108689461	0.827834668	0.089428368	0.681132308	NO
16	1523	191	1182	A	EMS.MUTANT	1P16A09	1	1523	1P16A09	NAN	NAN	NAN	x	B05	5	B	2	1	1	1	3	18398	14915	4591	4245	0.286729181	53	5.059451346	5.642423958	0.070684021	5.381438198	0.171444949	0.95326061	0.025639121	0.023413251	0.478988154	0.084054736	0.083857616	0.953937454	0.024687907	0.022777157	5.642217255	0.071132743	1.065546876	0.108676965	0.101768925	0.063488166	0.102790497	0.094185475	0.380542572	0.179878533	5.653447001	0.242108979	0.992405422	0.166328868	0.081937467	172	185	0.475065299	0.077712479	0.992206275	1.034197623	0.169176871	1.288537795	0.16358273	1.245929952	NO
122	3209	191	1182	A	SINGLE.SITE	ADE5_G479A	1	2146	2P15G08	ADE5	NAN	YES	x	B06	6	B	2	1	1	1	3	14056	9904	2331	2175	-0.975580179	58	5.143417215	5.731798207	0.073484559	5.645489079	0.10192769	0.984573421	0.011669617	0.011806554	0.879051882	0.018409849	0.018407769	0.9844951	0.011444262	0.011738343	5.731755315	0.073345072	1.218263105	0.064330425	0.065605221	0.19742616	0.052776794	0.053885458	0.619503466	0.091311013	5.74298506	0.481069873	1.12537866	0.077761348	0.048647226	172	185	0.608038537	0.044422238	1.007920622	1.323674895	0.096705385	0.736557796	0.07305826	0.556449169	NO
CTRL	1617	191	1182	A	WT	WT	1	NAN	NAN	NAN	NAN	NAN	x	B07	7	B	2	1	1	1	3	18481	15560	6363	5619	0.201027236	55	5.073564455	5.682437517	0.122123487	5.410073359	0.1790501	0.948876048	0.018778396	0.018455779	0.714844402	0.04118508	0.041161818	0.94774322	0.01799835	0.017777033	5.682748462	0.122165156	1.038794985	0.075804268	0.075894238	0.038061374	0.073157625	0.072167302	0.33210364	0.14080229	5.693978208	0.193670047	0.969111987	0.127252626	0.059723451	172	185	0.451771863	0.055498462	0.999319691	0.983488772	0.120817871	0.920210854	0.122846213	0.935659746	NO
145	3256	191	1182	A	SINGLE.SITE	MRN1_G1664A	1	2175	2P18H11	MRN1	NAN	YES	x	B08	8	B	2	1	1	1	3	19166	15701	5996	5098	-0.225911541	54	5.068762089	5.694770109	0.14290966	5.348838153	0.179813955	0.936975677	0.017982454	0.017854889	0.736700781	0.035168214	0.035153726	0.935921144	0.017579775	0.017234208	5.694488644	0.142708222	0.991198	0.066786963	0.066823158	-0.008840967	0.067564832	0.066750123	0.239654965	0.135980884	5.70571839	0.101221373	0.927668288	0.122431219	0.052386619	172	185	0.410328165	0.04816163	1.001380148	0.893267545	0.104845889	0.79856005	0.117373445	0.893976339	NO
19	1575	191	1182	A	EMS.MUTANT	1P04G01	1	1575	1P04G01	NAN	NAN	NAN	x	B09	9	B	2	1	1	1	3	18521	15072	6098	5428	-0.18549632	56	5.105098011	5.722074653	0.130373443	5.55095992	0.156042327	0.967568064	0.016931663	0.017166051	0.780246736	0.03273661	0.032724923	0.966588726	0.016847281	0.016657621	5.722213956	0.130382984	1.124382056	0.082053448	0.081178606	0.117233601	0.073345494	0.07193556	0.479475557	0.129968974	5.733443702	0.341041964	1.043634453	0.11641931	0.063314907	172	185	0.526294329	0.059089918	1.006246069	1.145721117	0.128636323	0.979760192	0.112275423	0.855147189	NO
191	1182	191	1182	A	GFP.MATALPHA	GFP.MATALPHA	1	NAN	NAN	NAN	NAN	NAN	x	B10	10	B	2	1	1	1	3	20098	15824	5989	4750	-0.553956448	55	5.098068798	5.713503981	0.156618771	5.210200674	0.219390479	0.910182559	0.023002782	0.023163016	0.598005704	0.054638424	0.05458415	0.908568188	0.021917805	0.02187899	5.713214505	0.156724339	0.896565542	0.068422893	0.067214535	-0.10918388	0.076033636	0.074677737	0.025754759	0.16939857	5.724444251	-0.112678834	0.845269813	0.155848905	0.05384387	172	185	0.32792969	0.049618882	1.004666624	0.713889451	0.108018265	0.822722495	0.151309513	1.152450836	NO
CTRL	1617	191	1182	A	WT	WT	1	NAN	NAN	NAN	NAN	NAN	x	B11	11	B	2	1	1	1	3	19068	15559	6207	5308	-0.271792959	54	5.076951594	5.680662698	0.128686487	5.419044093	0.183353949	0.950624461	0.019336505	0.019618523	0.731212425	0.038624373	0.038605183	0.949365709	0.018723995	0.019013529	5.680772959	0.12863384	1.045677477	0.079380484	0.08175045	0.044664979	0.076466354	0.077361136	0.344791505	0.149754815	5.692002705	0.206357912	0.975104717	0.136205151	0.064741379	172	185	0.457764594	0.06051639	0.998972981	0.9965347	0.131741693	1.003412285	0.132199805	1.006901501	NO
170	629	170	629	A	WT	WT	1	NAN	NAN	NAN	NAN	NAN	a	B12	12	B	2	1	1	1	3	19031	15722	5608	4855	0.008424052	52	5.041494339	5.618843748	0.081722769	5.183352423	0.20854658	0.921936521	0.027886424	0.027897328	0.125861763	0.141679462	0.140742737	0.921861669	0.025307381	0.025305636	5.619646298	0.083015179	0.940033395	0.087565286	0.085688509	-0.061839878	0.092595386	0.090817855	0.129709821	0.194635482	5.630876044	-0.008723771	0.883118189	0.181085817	0.069416716	170	171	0.366978863	0.065320809	0.997802276	0.97726858	0.173950003	1.108847674	0.177996108	1.134639644	NO
186	1177	190	1180	A	DELETION	CIS	1	NAN	NAN	NAN	NAN	NAN	a	C01	1	C	2	1	1	1	3	19798	16190	6299	5542	-0.249854421	55	5.090970493	5.704362462	0.142123998	5.527034753	0.182127818	0.96613507	0.017289311	0.017929206	0.741425797	0.039392531	0.039372174	0.964654413	0.016689624	0.017128827	5.704609416	0.142175735	1.115005247	0.080098233	0.082098429	0.10885911	0.071557141	0.073380599	0.464349222	0.133444977	5.713918881	0.320556345	1.032606644	0.11732402	0.062513109	172	185	0.51526652	0.05828812	1.002819372	1.12171403	0.126890841	0.966465712	0.113122274	0.86159724	NO
144	3254	191	1182	A	SINGLE.SITE	IRA2_G7496A	2	2157	2P17B12	IRA2	NAN	YES	x	C02	2	C	2	1	1	1	3	19005	15241	7215	5599	-0.597529771	52	5.044845416	5.579306754	0.1951492	5.224279197	0.283666166	0.936936343	0.019945347	0.020527773	0.567667726	0.066185394	0.066089006	0.935563215	0.016045213	0.017051459	5.57967446	0.196145793	0.989824447	0.061404463	0.065812658	-0.010227678	0.062185351	0.065856346	0.23685596	0.134299961	5.588983924	0.093063083	0.92419167	0.118179005	0.050156292	172	185	0.406851547	0.045931303	0.980892705	0.88569909	0.099990559	0.761579366	0.112894503	0.859862424	NO
171	880	171	880	A	NULL	NULL	1	NAN	NAN	NAN	NAN	NAN	a	C03	3	C	2	1	1	1	3	19603	16025	4745	4571	0.327494267	53	5.048672564	5.629749969	0.065440832	2.889301703	0.194438662	0.512915259	0.033466582	0.035065543	-0.052468415	0.100427848	0.100092246	0.512149687	0.032538731	0.034635302	5.629424014	0.065908964	0.517657056	0.004576781	0.004645093	-0.658442311	0.008831725	0.008961017	-3.074239233	0.259867057	5.638733479	-3.21803211	0.515263021	0.2437461	0.003773396	170	171	-0.000876305	-0.00032251	0.999194628	-0.00233361	-0.000858848	-0.005474744	0.368034227	2.346041323	NO
CTRL	1617	191	1182	A	WT	WT	1	NAN	NAN	NAN	NAN	NAN	x	C04	4	C	2	1	1	1	3	19284	15109	5761	4033	-0.720064665	55	5.09699411	5.699514268	0.155268822	5.444806486	0.207435932	0.952074435	0.02071249	0.020432906	0.677187391	0.048229907	0.048192563	0.950586649	0.018961296	0.01918086	5.699984542	0.155754049	1.050914516	0.081299167	0.083570796	0.049660752	0.077285427	0.078501302	0.354339265	0.151634716	5.709294006	0.210546388	0.97709977	0.13551376	0.064683102	172	185	0.459759646	0.060458113	1.002007685	1.000877847	0.131614827	1.002446008	0.131499391	1.001566786	NO
47	2479	191	1182	A	SINGLE.SITE	ECM23_G130A	1	123	Y123	ECM23	NAN	YES	x	C06	6	C	2	1	1	1	3	18418	15040	5774	5051	-0.074245842	55	5.086055533	5.690554889	0.122050671	5.432913198	0.176767358	0.951936349	0.019144289	0.0190339	0.749624666	0.035552189	0.035537222	0.951045096	0.018501157	0.01855074	5.690451309	0.121805624	1.0528939	0.079928687	0.081529434	0.051542468	0.075831939	0.076285494	0.357924317	0.147401385	5.699760774	0.21413144	0.978814049	0.131280428	0.06288751	172	185	0.461473925	0.058662521	1.000334558	1.004609762	0.127705897	0.97267359	0.127119904	0.968210371	NO
CTRL	1617	191	1182	A	WT	WT	1	NAN	NAN	NAN	NAN	NAN	x	C08	8	C	2	1	1	1	3	19385	15313	5918	4708	-0.559982595	55	5.088022662	5.703945763	0.154771988	5.448517721	0.216346106	0.952231841	0.019942137	0.01986751	0.662512405	0.050792811	0.050749198	0.950515295	0.01852856	0.018500299	5.704088503	0.15513228	1.050607075	0.079826395	0.080777171	0.049368164	0.075593143	0.075864449	0.353781275	0.146647639	5.713397967	0.209988398	0.976833505	0.130526683	0.062267928	172	185	0.459493382	0.058042939	1.002727949	1.0002982	0.126357092	0.962400405	0.126319424	0.962113503	NO
44	2200	191	1182	A	EMS.MUTANT	2P01A08	1	2200	2P01A08	NAN	NAN	NAN	x	C10	10	C	2	1	1	1	3	20746	17204	5525	4584	-0.328175847	53	5.039978925	5.634144112	0.089163997	5.209276353	0.125301484	0.923216152	0.014134261	0.015230844	0.767608566	0.027618673	0.027611654	0.92321965	0.01430787	0.015003738	5.634132562	0.089215449	0.944733518	0.04987374	0.051468231	-0.056852382	0.052800918	0.054596713	0.140329238	0.115671594	5.643442027	-0.003463639	0.8851399	0.099550638	0.038362607	172	185	0.367799776	0.034137619	0.990450356	0.800684991	0.074316193	0.566030229	0.092815768	0.706932483	NO
CTRL	1617	191	1182	A	WT	WT	1	NAN	NAN	NAN	NAN	NAN	x	C12	12	C	2	1	1	1	3	20454	15779	6633	3889	-0.933137761	54	5.084905519	5.679941841	0.17593318	5.418113941	0.238658819	0.951647086	0.021058019	0.021162032	0.679159532	0.047973652	0.0479369	0.950425431	0.019105391	0.019689051	5.680458561	0.176226981	1.050220125	0.082652722	0.084589241	0.048999785	0.078685102	0.080030208	0.353078537	0.153676251	5.689768026	0.20928566	0.976498381	0.137555295	0.065574838	172	185	0.459158257	0.06134985	0.998580784	0.999568648	0.133556101	1.017231745	0.133613735	1.017670719	NO
136	3242	191	1182	A	SINGLE.SITE	CAF40_G674A	2	2037	2P03H11	CAF40	NAN	YES	x	D01	1	D	2	1	1	1	3	21107	16215	7084	4688	-0.843867011	55	5.076804978	5.699342027	0.16630166	5.458595508	0.220781247	0.954547396	0.021499138	0.021400282	0.702302247	0.044258644	0.044229779	0.952656977	0.019882647	0.020331233	5.698631656	0.166151905	1.059909954	0.087255007	0.089307552	0.058183955	0.082197985	0.083475324	0.370529236	0.15944139	5.71229016	0.228226795	0.985613985	0.146251674	0.071053716	172	185	0.468273861	0.066828727	1.002533524	1.019412943	0.145483391	1.108076103	0.142712913	1.086974725	NO
CTRL	1617	191	1182	A	WT	WT	1	NAN	NAN	NAN	NAN	NAN	x	D02	2	D	2	1	1	1	3	18392	14553	5741	4566	-0.590851552	55	5.101527153	5.699811719	0.148690033	5.453760817	0.209673432	0.95374204	0.020765074	0.020422757	0.668615393	0.050023871	0.049982207	0.952342733	0.018867815	0.019151389	5.699869646	0.148998378	1.058535192	0.082162822	0.084684382	0.056886058	0.078088514	0.078952226	0.368071847	0.151559597	5.713528149	0.225769406	0.984421572	0.138369881	0.067059496	172	185	0.467081449	0.062834508	1.002750797	1.01681711	0.136788139	1.041848608	0.134525804	1.024617503	NO
185	3139	191	1182	A	NULL	NULL	1	NAN	NAN	NAN	NAN	NAN	x	D03	3	D	2	1	1	1	3	18754	15010	6166	5942	-0.426875711	54	5.088087339	5.662772465	0.170351002	2.980457892	0.206004615	0.526687159	0.031606831	0.033465183	0.515105031	0.002045311	0.002045308	0.526518827	0.031611832	0.033463601	5.66277265	0.170233447	0.519782792	0.004949215	0.005020518	-0.654344262	0.009510789	0.009645487	-2.961872508	0.251018128	5.676431154	-3.104174949	0.517129888	0.237828413	0.004125779	172	185	-0.000210235	-9.92E-05	0.996240101	-0.000457674	-0.000215974	-0.001644971	0.471896028	3.594202117	NO
184	2706	191	1182	A	RAP1.PAM.INS	RAP1.CONTROL	2	NAN	NAN	NAN	NAN	NAN	x	D04	4	D	2	1	1	1	3	18770	15109	5767	4851	-0.385097433	55	5.082298857	5.695568352	0.142227104	5.437411237	0.19683041	0.952032653	0.019578169	0.019482936	0.696306916	0.044899073	0.044868938	0.950781999	0.018588427	0.018543482	5.695642177	0.142522788	1.051757088	0.079736024	0.080774129	0.050462183	0.076045815	0.075959601	0.355866901	0.146336595	5.70930068	0.21356446	0.978542524	0.133146879	0.063745447	182	185	0.461202401	0.059520458	1.002052858	1.008529134	0.130155688	1.010209338	0.129054961	1.001665994	NO
21	1581	191	1182	A	EMS.MUTANT	1P06E01	1	1581	1P06E01	NAN	NAN	NAN	x	D05	5	D	2	1	1	1	3	14766	10720	3016	2929	-0.299008753	58	5.163706549	5.751111976	0.064805262	5.666616247	0.102853389	0.985501822	0.011453589	0.011365947	0.635126185	0.060923112	0.060847905	0.985589324	0.011121258	0.010785644	5.751412868	0.064920645	1.224437403	0.062374279	0.060979997	0.202481476	0.051456851	0.049770423	0.628060296	0.084150358	5.765071371	0.485757855	1.128318331	0.070960642	0.044601329	172	185	0.610978207	0.040376341	1.011796872	1.330074437	0.087897634	0.669473448	0.066084748	0.503335324	NO
CTRL	1617	191	1182	A	WT	WT	1	NAN	NAN	NAN	NAN	NAN	x	D06	6	D	2	1	1	1	3	18554	14909	5892	4679	-0.468770596	55	5.078243405	5.685314398	0.140139358	5.424638298	0.195822108	0.951099582	0.019347319	0.019150513	0.721317292	0.040416813	0.040394827	0.94953659	0.018461482	0.01837088	5.685221476	0.140067092	1.046407439	0.079069255	0.078924287	0.045362811	0.075773323	0.074757956	0.346127795	0.144384631	5.698879979	0.203825354	0.973902458	0.131194915	0.062202171	172	185	0.456562335	0.057977182	1.000179975	0.993917431	0.126213942	0.961310095	0.126986345	0.967193114	NO
182	2702	191	1182	A	RAP1.PAM.MUT	RAP1.CONTROL	2	NAN	NAN	NAN	NAN	NAN	x	D08	8	D	2	1	1	1	3	19252	15745	6292	5471	-0.13462398	55	5.083256699	5.685416568	0.127011357	5.415495857	0.180704666	0.949678597	0.018610571	0.01849763	0.719892178	0.040416813	0.040394827	0.948358414	0.017886119	0.017804824	5.685626532	0.127475047	1.041394326	0.075602913	0.076096367	0.040560513	0.072934107	0.07231038	0.336914458	0.140499741	5.699285036	0.194612017	0.96955429	0.127310025	0.0598067	182	185	0.452214166	0.055581711	1.000294989	0.988874214	0.121542679	0.943359071	0.122910151	0.953972768	NO
79	2918	191	1182	A	SINGLE.SITE	ADE6_G2801A	2	2021	2P02B11	ADE6	NAN	YES	x	D09	9	D	2	1	1	1	3	17810	13035	4022	3886	0.305299033	56	5.154141007	5.728992171	0.085388679	5.597187637	0.125798755	0.97584243	0.012838023	0.012629253	0.685585048	0.05066465	0.050621366	0.975567169	0.011948302	0.0119434	5.728992891	0.085842177	1.169812324	0.06248553	0.062578474	0.156843329	0.053203686	0.053362818	0.549687012	0.093396505	5.742651395	0.407384571	1.080938783	0.08020679	0.046612706	172	185	0.563598659	0.042387717	1.007862062	1.226931109	0.092276318	0.702823751	0.075209046	0.572830655	NO
CTRL	1617	191	1182	A	WT	WT	1	NAN	NAN	NAN	NAN	NAN	x	D10	10	D	2	1	1	1	3	19419	15722	6420	4780	-0.584638246	55	5.087450839	5.69288832	0.137831555	5.429340393	0.199947761	0.95122611	0.020365449	0.020197999	0.696349899	0.044770984	0.044741106	0.949687871	0.019242651	0.019266755	5.69285948	0.137939259	1.047054493	0.082668827	0.082756996	0.045980976	0.079010757	0.078342185	0.34731082	0.151217215	5.706517983	0.205008379	0.974463686	0.138027499	0.065519102	172	185	0.457123563	0.061294114	1.00152048	0.995139201	0.133434765	1.016307591	0.134086533	1.021271788	NO
4	99	190	1180	A	EMS.MUTANT	Y99	1	99	Y99	NAN	NAN	NAN	a	D11	11	D	2	1	1	1	3	13406	10435	3423	3072	0.204739144	55	5.120163074	5.707354674	0.10087026	5.391041902	0.132784443	0.943719883	0.015424085	0.015779033	0.81310208	0.022885874	0.02288188	0.943388552	0.015434851	0.01562143	5.707528409	0.101181298	1.020748716	0.063044416	0.064315053	0.020536393	0.061613999	0.062387826	0.298050122	0.123453327	5.721186912	0.155747681	0.951647137	0.110263611	0.049824263	170	171	0.435507811	0.045728356	1.013805538	1.15976189	0.121775095	0.776257706	0.105000083	0.669325068	NO
120	3205	191	1182	A	SINGLE.SITE	COG6_G640A	1	2204	2P03B06	COG6	D	NO	x	D12	12	D	2	1	1	1	3	19909	15653	5836	4809	-0.480609193	55	5.092084503	5.706795419	0.156004668	5.447977764	0.212544919	0.952498994	0.020765323	0.020269271	0.677260781	0.048229907	0.048192563	0.951248318	0.019026026	0.019126251	5.706919447	0.156173383	1.053773603	0.082124022	0.084057126	0.052377629	0.077913957	0.078627769	0.359513516	0.151730013	5.72057795	0.217211075	0.980291566	0.138540297	0.066569914	172	185	0.462951443	0.062344925	1.00398807	1.007826256	0.135722339	1.033730927	0.13466839	1.025703508	NO
CTRL	1617	191	1182	A	WT	WT	1	NAN	NAN	NAN	NAN	NAN	x	E01	1	E	2	1	1	1	4	20108	16346	6250	5464	-0.19418806	55	5.074578011	5.702209886	0.151756652	5.445228895	0.209118247	0.952266227	0.020537822	0.019965186	0.676518549	0.048358037	0.048320395	0.950309416	0.019170927	0.018840152	5.702030858	0.151739759	1.049720973	0.081520552	0.082202322	0.048524389	0.07828995	0.077231352	0.352171297	0.149475401	5.708956172	0.215506456	0.979473178	0.134609864	0.064571141	172	185	0.462133055	0.060346152	1.001948394	1.00604466	0.131371092	1.000589598	0.13058177	0.994577714	NO
155	3273	191	1182	A	OFF.TARGET	SET1_TTATCGAGTACGTTGGTGA2890del	1	54	Y54	SET1	NAN	YES	x	E03	3	E	2	1	1	1	4	17008	13757	4990	4400	0.080834781	54	5.094872136	5.679744416	0.096330879	5.445574618	0.148858723	0.956270455	0.016300204	0.016296903	0.709984786	0.043362104	0.043334957	0.955633492	0.015861923	0.015655678	5.679885839	0.096487294	1.073100609	0.071664788	0.070361441	0.070552222	0.06655406	0.065189616	0.393805595	0.122726633	5.686811153	0.257140754	0.999866359	0.107861095	0.053939628	172	185	0.482526235	0.049714639	0.99806184	1.050439775	0.108226726	0.824310239	0.10302992	0.7847287	NO
126	3222	191	1182	A	SINGLE.SITE	ADE5_G713A	2	1611	1P15H09	ADE5	NAN	YES	x	E04	4	E	2	1	1	1	4	13574	9287	3677	2012	-1.137264174	59	5.153265348	5.753033907	0.089575506	5.671609232	0.111526048	0.984920965	0.012078509	0.012949945	0.99521686	-0.001789646	-0.001789644	0.984965909	0.011986416	0.012948462	5.75303518	0.089547535	1.220913228	0.067477234	0.071413983	0.199599126	0.055353042	0.059062694	0.623185188	0.099030519	5.759960495	0.486520347	1.128797767	0.084164982	0.052941086	172	185	0.611457644	0.048716097	1.01089989	1.33111815	0.106052941	0.807753578	0.079672072	0.606823352	NO
CTRL	1617	191	1182	A	WT	WT	1	NAN	NAN	NAN	NAN	NAN	x	E05	5	E	2	1	1	1	4	18375	14440	5694	4176	-0.669922358	54	5.081977231	5.683950278	0.139381128	5.415286425	0.207175786	0.950389553	0.021105603	0.020757472	0.663142653	0.050536491	0.050493534	0.949240643	0.019497321	0.01954264	5.684158175	0.139776975	1.045143843	0.082995945	0.083208729	0.044154525	0.079608074	0.079112108	0.343813488	0.152575316	5.691083489	0.207148647	0.97548072	0.137709778	0.065508341	172	185	0.458140597	0.061283353	0.998811654	0.997353242	0.133411339	1.016129168	0.133765384	1.018825753	NO
151	3267	191	1182	A	SINGLE.SITE	NAP1_G1034A	1	1523	1P16A09	NAP1	NAN	YES	x	E07	7	E	2	1	1	1	4	18056	14714	5520	4913	-0.059112595	54	5.08035662	5.676648806	0.123071474	5.39720456	0.177872942	0.947897131	0.018482804	0.018434684	0.730820312	0.038240312	0.038221688	0.946892838	0.017847636	0.017825783	5.676811932	0.122978447	1.035222446	0.074623445	0.075482439	0.034616328	0.072480682	0.072069767	0.325453648	0.140972659	5.683737246	0.188788806	0.966826657	0.126107121	0.058897635	172	185	0.449486534	0.054672647	0.997522355	0.978513703	0.119020104	0.906518141	0.121633559	0.926423552	NO
172	1617	172	1617	A	WT	WT	1	NAN	NAN	NAN	NAN	NAN	x	E08	8	E	2	1	1	1	4	18752	14606	5250	4280	-0.467591814	55	5.081223416	5.69237052	0.140085393	5.42483102	0.188910709	0.950728782	0.018605809	0.018766139	0.71847471	0.040800941	0.040778323	0.949852487	0.018019068	0.017988095	5.692637921	0.140305619	1.047759448	0.07690548	0.077296721	0.046654026	0.073604548	0.073218252	0.348598116	0.14105826	5.699563235	0.211933275	0.977762214	0.126192723	0.060317603	172	185	0.460422091	0.056092614	1.000299889	1.002319961	0.122111315	0.930062387	0.121828677	0.927909672	NO
CTRL	1617	191	1182	A	WT	WT	1	NAN	NAN	NAN	NAN	NAN	x	E09	9	E	2	1	1	1	4	19209	15482	5959	4805	-0.405190997	54	5.076843262	5.684050522	0.131596995	5.420696554	0.189290208	0.950949023	0.019294637	0.019792014	0.695740425	0.044899073	0.044868938	0.94960433	0.018323887	0.018904271	5.684246176	0.132104088	1.04669708	0.078024488	0.081175773	0.045639568	0.074980128	0.076853439	0.346657526	0.148424869	5.69117149	0.209992685	0.97683555	0.133559331	0.06371493	172	185	0.459495427	0.059489942	0.998827099	1.000302652	0.129507157	0.986392911	0.129467973	0.986094467	NO
82	2921	191	1182	A	SINGLE.SITE	ADE6_G3443A	2	1577	1P05D03	ADE6	NAN	YES	x	E10	10	E	2	1	1	1	4	14559	10200	2922	2814	-0.279693566	59	5.184183541	5.769644985	0.065006718	5.766661528	0.099145051	0.999756393	0.009594117	0.009726905	0.697825852	0.05233087	0.052283179	0.999491289	0.009011628	0.009206046	5.769520635	0.065034291	1.307658841	0.05687955	0.05782047	0.268238394	0.04336464	0.04431077	0.736773707	0.071570913	5.776445949	0.600108866	1.204462714	0.056705375	0.039959174	172	185	0.687122591	0.035734186	1.013793164	1.495837629	0.077791854	0.592502646	0.052005547	0.39610091	NO
59	2692	191	1182	A	SINGLE.SITE	NUP192_G3133A	1	99	Y99	NUP192	NAN	YES	x	E11	11	E	2	1	1	1	4	18649	15222	5887	5030	-0.311080738	54	5.079732883	5.69036932	0.138032668	5.427184139	0.193218756	0.950819022	0.019522373	0.018971727	0.696055588	0.044770984	0.044741106	0.949257322	0.017825698	0.018026622	5.690301319	0.138294772	1.045214982	0.075638851	0.077947617	0.044222588	0.072501039	0.073601337	0.343943923	0.14290966	5.697226634	0.207279082	0.975542772	0.128044122	0.060918348	172	185	0.458202648	0.05669336	0.999889805	0.997488326	0.123419113	0.940023247	0.123729882	0.942390223	NO
187	1156	190	1180	A	m76	CIS	1	NAN	NAN	NAN	NAN	NAN	a	F01	1	F	2	1	1	1	4	19865	15148	6209	4122	-0.939393988	55	5.113474742	5.70686494	0.185014345	5.507975892	0.247898921	0.964276242	0.019969868	0.020336338	0.697077504	0.046820582	0.046786414	0.963066465	0.017601648	0.018810392	5.706862088	0.185399775	1.107412792	0.084007656	0.089290193	0.102026477	0.075697448	0.08011735	0.451931462	0.146948147	5.71487162	0.312846764	1.028514585	0.132399846	0.07000409	172	185	0.511174461	0.065779101	1.002986582	1.112805785	0.143198399	1.090672429	0.128682292	0.980110315	NO
CTRL	1617	191	1182	A	WT	WT	1	NAN	NAN	NAN	NAN	NAN	x	F03	3	F	2	1	1	1	4	18343	14728	5424	4775	-0.220658204	55	5.089087064	5.699979	0.140571343	5.439528477	0.192925046	0.951272119	0.020303488	0.019673414	0.701188938	0.043874404	0.043846284	0.949729779	0.018915833	0.018825391	5.700266441	0.140580129	1.047233871	0.080886315	0.081484133	0.04615228	0.076914396	0.076871502	0.347638534	0.148842599	5.708275973	0.208553837	0.976149637	0.134294297	0.063973434	172	185	0.458809513	0.059748445	1.001829015	0.998809446	0.130069909	0.990679118	0.130224948	0.99185998	NO
188	1200	190	1180	A	m75	CIS	1	NAN	NAN	NAN	NAN	NAN	a	F05	5	F	2	1	1	1	4	19412	15485	6254	4732	-0.623816146	55	5.095532183	5.695440084	0.144140738	5.455049768	0.195653616	0.955469294	0.019762001	0.02015912	0.687346149	0.047076809	0.047042077	0.953939125	0.019318826	0.019097055	5.695580716	0.144456935	1.065554268	0.085112478	0.084291258	0.063495103	0.080149207	0.078681616	0.380555637	0.148984475	5.703590248	0.24147094	0.992091209	0.134436174	0.066184143	172	185	0.474751086	0.061959154	1.001006649	1.033513594	0.134882532	1.027334523	0.130508716	0.994021297	NO
73	2907	191	1182	A	SINGLE.SITE	ADE4_C734T	2	1509	1P12D09	ADE4	NAN	YES	x	F06	6	F	2	1	1	1	4	22136	18071	7089	6481	0.067230832	52	5.015968922	5.607718737	0.077551031	5.343735423	0.13534639	0.95190532	0.015667283	0.015569008	0.564913594	0.069010545	0.068901304	0.951572107	0.014516923	0.014596329	5.607787406	0.077867158	1.055178104	0.063158317	0.06316675	0.053709572	0.059746382	0.059750338	0.362045547	0.113732828	5.615796938	0.22296085	0.983062345	0.099184527	0.047933915	172	185	0.465722222	0.043708927	0.985598514	1.013858128	0.095152536	0.724730505	0.093851924	0.714824377	NO
CTRL	1617	191	1182	A	WT	WT	1	NAN	NAN	NAN	NAN	NAN	x	F07	7	F	2	1	1	1	4	19578	15067	6421	3789	-0.868910281	54	5.089765172	5.675991772	0.148601371	5.404349568	0.220392384	0.949692256	0.021333577	0.021013927	0.670121334	0.049254991	0.049215217	0.948737052	0.019039121	0.019665469	5.675866547	0.149196284	1.04300039	0.081033074	0.083436445	0.04210155	0.077769154	0.07945259	0.339875411	0.153596553	5.683876079	0.200790713	0.972465854	0.139048251	0.065725839	172	185	0.455125731	0.061500851	0.99754672	0.990790004	0.133884823	1.019735465	0.135129364	1.029214527	NO
175	2004	191	1182	A	CHR2SNP.69593(T_G)	POLYMORPHISM	2	NAN	NAN	NAN	NAN	NAN	x	F08	8	F	2	1	1	1	4	19385	15229	5856	4808	-0.481712201	55	5.092836033	5.695718897	0.135607292	5.433174365	0.190178552	0.950731639	0.019603038	0.019536021	0.69135123	0.045539538	0.045508097	0.949170554	0.019076215	0.018589078	5.695637357	0.135789229	1.044845016	0.080661794	0.08029717	0.043868564	0.07713738	0.075834898	0.343265394	0.14731727	5.703646889	0.204180697	0.974070963	0.132768969	0.062970834	172	185	0.45673084	0.058745845	1.00101659	0.99428426	0.127887289	0.97405517	0.128622462	0.979654621	NO
30	2037	191	1182	A	EMS.MUTANT	2P03H11	1	2037	2P03H11	NAN	NAN	NAN	x	F09	9	F	2	1	1	1	4	19568	15365	6021	4474	-0.705232559	55	5.083741755	5.70257226	0.161889597	5.407372201	0.202269857	0.946117144	0.020317897	0.020707634	0.733159081	0.037344211	0.037326866	0.944923069	0.019610843	0.019974215	5.702588124	0.161947734	1.027037935	0.080224946	0.082947542	0.026678868	0.078322044	0.079853266	0.310050046	0.157319366	5.710597656	0.170965349	0.958576055	0.142771064	0.065502491	172	185	0.441235932	0.061277502	1.002236482	0.960552482	0.133398603	1.016032161	0.138876954	1.057758093	NO
138	3245	191	1182	A	SINGLE.SITE	HXK2_G1388A	2	2053	2P05G06	HXK2	NAN	YES	x	F10	10	F	2	1	1	1	4	23388	19848	8022	6854	0.019968723	52	5.031504124	5.612975539	0.095972172	5.229483459	0.158940162	0.930428964	0.018058736	0.018620798	0.645330161	0.050792811	0.050749198	0.929798897	0.017631432	0.017870394	5.613185894	0.095912861	0.968225291	0.06452385	0.06623268	-0.032290481	0.066746964	0.0676148	0.191778979	0.141388949	5.621195426	0.052694282	0.907399979	0.126840648	0.051702506	172	185	0.390059855	0.047477518	0.986545974	0.849144267	0.103356605	0.787216897	0.121718545	0.927070849	NO
CTRL	1617	191	1182	A	WT	WT	1	NAN	NAN	NAN	NAN	NAN	x	F11	11	F	2	1	1	1	4	19306	15536	5646	4882	-0.392857619	55	5.094189208	5.712176012	0.156668682	5.455501132	0.205363162	0.952348084	0.020169829	0.019602886	0.714897313	0.041569232	0.041545313	0.950861089	0.018858067	0.018744999	5.71231098	0.156758216	1.052098582	0.081611348	0.081533731	0.050786819	0.077319578	0.076721595	0.356485385	0.147621418	5.720320512	0.217400687	0.980382685	0.133073117	0.063955008	172	185	0.463042562	0.059730019	1.003942888	1.008024619	0.130029796	0.990373602	0.128994663	0.982489498	NO
35	2072	191	1182	A	EMS.MUTANT	2P07G03	1	2072	2P07G03	NAN	NAN	NAN	x	F12	12	F	2	1	1	1	4	21731	16013	6085	5921	0.136719435	55	5.127387463	5.699611418	0.09692496	5.559790558	0.151433129	0.973928175	0.014603824	0.014634236	0.519053785	0.079807965	0.079639169	0.973754067	0.012587784	0.012620149	5.699577355	0.097246583	1.160379354	0.065250792	0.065543745	0.148746981	0.056199204	0.056156165	0.535508544	0.099218929	5.707586887	0.396423847	1.074603668	0.084670628	0.048670497	172	185	0.557263544	0.044445508	1.001708078	1.213139824	0.096756044	0.736943644	0.079756712	0.607468018	NO
190	1180	190	1180	A	GFP.MATA	GFP.MATA	1	NAN	NAN	NAN	NAN	NAN	a	G01	1	G	2	1	1	1	4	20385	15772	6442	4534	-0.761248538	55	5.096911044	5.70062714	0.177638614	5.187550331	0.236627952	0.907556628	0.022546887	0.022844422	0.61216064	0.051818156	0.051771852	0.906393196	0.020627039	0.021325812	5.700543384	0.177335575	0.889873941	0.063323113	0.065070418	-0.116675466	0.071054117	0.072479588	0.008746312	0.166807975	5.70300958	-0.133887933	0.83801949	0.151677446	0.051302972	172	185	0.320679366	0.047077984	1.000904739	0.698105796	0.102486835	0.780592284	0.146807025	1.118157575	NO
189	1188	190	1180	A	m63	CIS	1	NAN	NAN	NAN	NAN	NAN	a	G02	2	G	2	1	1	1	4	18828	15834	6526	5380	-0.242363567	55	5.078161361	5.684618734	0.135855101	5.437065294	0.193873298	0.95367519	0.020276232	0.020825913	0.688974551	0.046564361	0.046530751	0.951885413	0.019577923	0.01991111	5.684625779	0.13553449	1.056540524	0.084652189	0.085913525	0.054999914	0.080630712	0.081111715	0.364495604	0.154310259	5.687091974	0.221861359	0.982531275	0.13917973	0.067188889	172	185	0.465191152	0.062963901	0.998111125	1.012702011	0.137069824	1.043994059	0.135350599	1.030899562	NO
49	2505	191	1182	A	SINGLE.SITE	CYC8_G1010A	2	126	Y126	CYC8	NAN	YES	x	G03	3	G	2	1	1	1	4	16773	14176	5287	4928	0.921665821	53	5.045305614	5.628948043	0.082403582	5.248667091	0.122439009	0.932428121	0.013618556	0.014232566	0.634974181	0.052843611	0.052794505	0.932515784	0.013445211	0.01363068	5.629233784	0.082648296	0.978284343	0.04986751	0.05195165	-0.021954913	0.051341446	0.052447927	0.213025043	0.108571398	5.63169998	0.070390798	0.914677598	0.093440869	0.038768189	172	185	0.397337474	0.034543201	0.988389572	0.864987345	0.075199127	0.572755113	0.086936679	0.662154327	NO
CTRL	1617	191	1182	A	WT	WT	1	NAN	NAN	NAN	NAN	NAN	x	G04	4	G	2	1	1	1	4	19479	15830	6362	5058	-0.449980954	55	5.083184954	5.691222545	0.143461856	5.433071042	0.201945454	0.951973484	0.02031938	0.020502414	0.662170895	0.050920973	0.050877029	0.949985787	0.018709175	0.019282585	5.691229574	0.143378889	1.048330963	0.080587723	0.083368036	0.04719934	0.076840392	0.07863896	0.349640526	0.151979255	5.693695769	0.207006281	0.975413001	0.136848725	0.065089472	172	185	0.458072878	0.060864484	0.999270122	0.997205821	0.132499479	1.009183973	0.132870744	1.012011715	NO
141	3250	191	1182	A	SINGLE.SITE	NAM7_G2462A	1	2058	2P06D08	NAM7	NAN	YES	x	G05	5	G	2	1	1	1	4	19033	15004	6152	4905	-0.598158769	56	5.105553281	5.708346953	0.133979448	5.528500195	0.172750665	0.964939716	0.017902599	0.01902477	0.754688848	0.036832181	0.036815539	0.963711436	0.018038099	0.018386	5.708547022	0.134187179	1.110485227	0.085785075	0.08759366	0.104797061	0.077612414	0.078490367	0.456975139	0.143430853	5.711013217	0.314340894	1.02930517	0.128300324	0.067937972	172	185	0.511965047	0.063712983	1.002309414	1.114526857	0.138700545	1.05641447	0.124447916	0.947859142	NO
172	1617	191	1182	A	WT	WT	1	NAN	NAN	NAN	NAN	NAN	x	G06	6	G	2	1	1	1	4	19354	15623	6184	4806	-0.545307904	55	5.077044408	5.687003385	0.137131999	5.427184952	0.19391011	0.950807115	0.020089813	0.020219552	0.677980793	0.047973652	0.0479369	0.949413481	0.018854135	0.019149584	5.687086234	0.137424566	1.04588145	0.079954417	0.0823807	0.044860023	0.076596193	0.077917212	0.345165085	0.150852974	5.689552429	0.20253084	0.9732891	0.135722445	0.064265518	172	185	0.455948976	0.060040529	0.998542946	0.992582175	0.130705764	0.995522116	0.131682562	1.002961912	NO
66	2798	191	1182	A	SINGLE.SITE	CCC2_G2108A	1	135	Y135	CCC2	NAN	YES	x	G07	7	G	2	1	1	1	4	19438	15039	6315	4247	-0.802861878	54	5.078478594	5.683962416	0.172826345	5.372505121	0.223195748	0.942929858	0.021010586	0.020509215	0.679716095	0.046308146	0.046275087	0.942253505	0.01921863	0.019155711	5.68418467	0.172355189	1.016145042	0.078308192	0.077887466	0.016016096	0.076728069	0.075859511	0.28917405	0.150838627	5.686650865	0.146539805	0.947505518	0.135708098	0.060759683	172	185	0.430165394	0.056534695	0.998033708	0.936452377	0.123073706	0.937392454	0.131425483	1.001003871	NO
CTRL	1617	191	1182	A	WT	WT	1	NAN	NAN	NAN	NAN	NAN	x	G08	8	G	2	1	1	1	4	19835	15765	6261	4889	-0.568658937	55	5.087950557	5.695346814	0.145639018	5.439530056	0.198163728	0.95217062	0.019973334	0.020014708	0.692077596	0.045667636	0.045635928	0.950730086	0.019103834	0.018990482	5.695043198	0.145832871	1.051533055	0.08199067	0.082113017	0.050249152	0.078347254	0.077492709	0.355460942	0.148822629	5.697509393	0.212826697	0.978189443	0.1336921	0.063959272	172	185	0.460849319	0.059734284	0.999939431	1.00325002	0.13003908	0.99044431	0.129617819	0.987235774	NO
111	3191	191	1182	A	SINGLE.SITE	ATP23_G476A	1	2204	2P03B06	ATP23	D	YES	x	G09	9	G	2	1	1	1	4	19221	16539	7243	5875	0.488421498	52	4.993971458	5.586766161	0.089993369	5.186795351	0.13842022	0.927671318	0.015548674	0.016868335	0.700441355	0.040672897	0.040650491	0.927430363	0.014717662	0.016501268	5.586712524	0.090259546	0.959628668	0.052694558	0.059406085	-0.041208873	0.054801106	0.061516253	0.173257026	0.129186774	5.589178719	0.030622781	0.898501801	0.114056245	0.045476464	172	185	0.381161677	0.041251475	0.980926893	0.8297733	0.089802765	0.683983906	0.108225662	0.824302139	NO
24	1597	191	1182	A	EMS.MUTANT	1P11D07	1	1597	1P11D07	NAN	NAN	NAN	x	G10	10	G	2	1	1	1	4	15561	11485	3263	3083	-0.511513664	56	5.132227413	5.714058031	0.068260198	5.61935216	0.087428369	0.983581668	0.007780389	0.007957704	0.837462243	0.025571918	0.025566346	0.983688942	0.007497263	0.007795232	5.7141423	0.068250081	1.213747935	0.041792326	0.043158237	0.193713039	0.0345002	0.035693601	0.613199307	0.060448608	5.716608496	0.470565062	1.118841285	0.045318079	0.02805457	172	185	0.601501161	0.023829581	1.003291412	1.309443297	0.051876019	0.395114357	0.03961685	0.301742243	NO
CTRL	1617	191	1182	A	WT	WT	1	NAN	NAN	NAN	NAN	NAN	x	G12	12	G	2	1	1	1	4	19840	15926	5868	4966	-0.414259885	55	5.094446515	5.721808546	0.163002152	5.46276699	0.212727713	0.952527647	0.020365478	0.019888989	0.693425002	0.045283348	0.045252433	0.951379051	0.018912117	0.018847824	5.721851242	0.163066026	1.054340257	0.08208642	0.082611168	0.052915223	0.077578328	0.077414802	0.360535851	0.148967566	5.724317437	0.217901606	0.980623487	0.133837037	0.064354377	172	185	0.463283364	0.060129388	1.004644367	1.008548835	0.130899206	0.99699547	0.129789655	0.988544566	NO
CTRL	1617	191	1182	A	WT	WT	1	NAN	NAN	NAN	NAN	NAN	x	H02	2	H	2	1	1	1	4	19530	15388	6071	4819	-0.523407416	55	5.089429526	5.701340849	0.156211484	5.453087369	0.213827836	0.95304939	0.02040397	0.02060761	0.675882686	0.048614302	0.048576058	0.951374293	0.019020781	0.019430118	5.701324652	0.156045866	1.054319623	0.082617896	0.085064821	0.052895652	0.078345895	0.079716734	0.360498641	0.153397794	5.700744191	0.218246628	0.980789417	0.136030093	0.06543146	172	185	0.463449293	0.061206471	1.000507153	1.008910057	0.133243972	1.014854409	0.132067245	1.005891855	NO
11	1480	191	1182	A	EMS.MUTANT	1P06B05	1	1480	1P06B05	NAN	NAN	NAN	x	H05	5	H	2	1	1	1	4	20300	15630	6316	5182	-0.655322852	55	5.093282879	5.692937645	0.17523163	5.405179808	0.238479351	0.948088021	0.021336203	0.021247135	0.707062861	0.042337573	0.042312303	0.946960791	0.020067282	0.02016983	5.693144064	0.175366684	1.035507053	0.083463954	0.085367105	0.034891213	0.081003946	0.081392684	0.325985044	0.159348778	5.692563603	0.183733031	0.964471344	0.141981077	0.065977069	172	185	0.447131221	0.06175208	0.999071421	0.973386284	0.13443174	1.023901059	0.138107288	1.051895918	NO
CTRL	1617	191	1182	A	WT	WT	1	NAN	NAN	NAN	NAN	NAN	x	H06	6	H	2	1	1	1	4	18881	15388	6080	4723	-0.491730198	55	5.080765016	5.692994889	0.145892986	5.430371797	0.21040265	0.951298715	0.020422143	0.020205506	0.6767261	0.048229907	0.048192563	0.949742099	0.018849296	0.019058856	5.693098631	0.146094965	1.04728662	0.080359923	0.082375968	0.046202648	0.076698124	0.077710503	0.347734882	0.150457166	5.69251817	0.205482869	0.974688972	0.133089465	0.063205092	172	185	0.457348848	0.058980103	0.999063448	0.995629638	0.128397259	0.977939364	0.128960865	0.982232073	NO
135	3241	191	1182	A	SINGLE.SITE	CAF40_G674A	1	2037	2P03H11	CAF40	NAN	YES	x	H07	7	H	2	1	1	1	4	22590	17571	7680	5701	-0.662053443	54	5.04555853	5.655246995	0.154922963	5.385400695	0.208995784	0.949626031	0.020730339	0.020407592	0.696435058	0.044770984	0.044741106	0.947841255	0.019620919	0.019248697	5.655111603	0.154784277	1.039208368	0.082579935	0.082409822	0.038459238	0.07972723	0.078148199	0.332870271	0.152773119	5.654531142	0.190618258	0.967681874	0.135405417	0.063356154	172	185	0.450341751	0.059131166	0.992396547	0.980375476	0.128726116	0.980444107	0.131302873	1.000070005	NO
62	2728	191	1182	A	SINGLE.SITE	TYE7_�C391T	1	134	Y134	TYE7	NAN	YES	x	H08	8	H	2	1	1	1	4	20905	16861	6899	5345	-0.558907158	54	5.052602142	5.662218405	0.140128009	5.248946271	0.183925268	0.924890528	0.018838653	0.019328339	0.730108539	0.034400296	0.034386736	0.923967599	0.018533062	0.018720131	5.662214937	0.14034398	0.947343649	0.064647124	0.065513558	-0.05409337	0.068358833	0.068700804	0.146178202	0.146378904	5.661634476	0.003926189	0.887998175	0.129011202	0.050084213	172	185	0.370658052	0.045859225	0.993643215	0.806907339	0.099833647	0.760384242	0.123723805	0.942343941	NO
52	2522	191	1182	A	SINGLE.SITE	CHD1_G2723A	1	54	Y54	CHD1	NAN	YES	x	H09	9	H	2	1	1	1	4	20267	16364	7148	5074	-0.646308889	55	5.078348004	5.688529716	0.154306063	5.427701904	0.230416078	0.951665263	0.022474826	0.022388434	0.604372452	0.061051419	0.060975736	0.949703367	0.020108101	0.020561232	5.688839005	0.155198974	1.047120814	0.085783336	0.088289329	0.046044315	0.082403729	0.083496545	0.347431996	0.161306589	5.688258544	0.205179983	0.974545151	0.143938887	0.068336855	172	185	0.457205027	0.064111866	0.998315863	0.995316546	0.139568897	1.063028282	0.140225637	1.068030352	NO
CTRL	1617	191	1182	A	WT	WT	1	NAN	NAN	NAN	NAN	NAN	x	H10	10	H	2	1	1	1	4	19504	15714	6357	4844	-0.579385173	55	5.083321482	5.698397661	0.156674559	5.448727955	0.220058908	0.952976079	0.021746542	0.020988929	0.660617109	0.05130547	0.051260525	0.951478632	0.019729404	0.019644467	5.698840297	0.156562537	1.054772272	0.085275608	0.086100464	0.053324887	0.081525502	0.080636739	0.361314572	0.155138739	5.698259836	0.219062559	0.981182046	0.137771037	0.06632296	172	185	0.463841922	0.062097971	1.000071137	1.009764794	0.13518473	1.029636222	0.133877445	1.019679264	NO
130	3227	191	1182	A	SINGLE.SITE	ADE5_G2081A	2	1597	1P11D07	ADE5	NAN	YES	x	H11	11	H	2	1	1	1	4	14551	10054	2454	2285	-0.852039121	57	5.146830473	5.733474932	0.070068642	5.66531921	0.092959014	0.987803724	0.008354634	0.00863424	0.84265456	0.025316089	0.025310683	0.987758552	0.007899329	0.008474286	5.733340014	0.070162611	1.236834854	0.045245757	0.048423867	0.212555579	0.036664194	0.039298733	0.645023669	0.06569933	5.732759553	0.502771656	1.139103609	0.048331628	0.030899446	172	185	0.621763485	0.026674457	1.006125998	1.353553544	0.058069197	0.442284778	0.042901293	0.326758243	NO
8	134	190	1180	A	EMS.MUTANT	Y134	1	134	Y134	NAN	NAN	NAN	a	H12	12	H	2	1	1	1	4	19436	15731	6336	5308	-0.378073301	54	5.049801049	5.654955357	0.136650185	5.075880753	0.22439599	0.893183776	0.027476867	0.027604564	0.513825678	0.06708419	0.066983828	0.891317697	0.026138709	0.025978765	5.655638663	0.136527396	0.846493169	0.070841526	0.072713365	-0.166653148	0.083847205	0.083738228	-0.109144133	0.209723274	5.655058202	-0.251396146	0.800520204	0.192355572	0.057848636	170	171	0.284380878	0.053752729	1.002087401	0.757309275	0.143144085	0.912474749	0.18901668	1.204890498	NO
CTRL	1617	191	1182	A	WT	WT	1	NAN	NAN	NAN	NAN	NAN	x	A01	1	A	3	1	1	1	5	20522	16331	6419	4871	-0.610627578	54	5.076269243	5.695730274	0.156127336	5.415240524	0.206511091	0.948914666	0.020286681	0.019734745	0.663992189	0.050023871	0.049982207	0.947631391	0.018771578	0.018432608	5.696114052	0.156322601	1.038323821	0.077989851	0.078489415	0.037607703	0.07619667	0.074700151	0.331229133	0.145744373	5.710411445	0.219121397	0.981210371	0.135137963	0.065059226	172	185	0.463870248	0.060834237	1.002203801	1.009826458	0.132433634	1.008682461	0.131144944	0.998867135	NO
72	2906	191	1182	A	SINGLE.SITE	ADE4_C734T	1	1509	1P12D09	ADE4	NAN	YES	x	A03	3	A	3	1	1	1	5	22210	18695	7914	7237	0.402929543	52	5.014725748	5.606799334	0.080747253	5.319012317	0.132228545	0.947424057	0.015316761	0.01526621	0.587852154	0.064131402	0.064043698	0.946987425	0.014461846	0.014404143	5.606824077	0.080731351	1.035618643	0.060202213	0.060725236	0.034998971	0.05829607	0.058229288	0.32619332	0.113327927	5.621121471	0.214085584	0.978792083	0.102721517	0.049204625	172	185	0.461451959	0.044979636	0.986532994	1.004561943	0.097918818	0.745799928	0.097474147	0.742413082	NO
185	3139	185	3139	A	NULL	NULL	1	NAN	NAN	NAN	NAN	NAN	x	A04	4	A	3	1	1	1	5	19531	15925	6748	6536	-0.482729898	54	5.070934841	5.651823448	0.182241874	2.986323777	0.209682248	0.528287491	0.032123981	0.033927266	0.513115324	0.002684473	0.002684466	0.528208865	0.032105564	0.033924381	5.651713096	0.182436065	0.520048877	0.005075234	0.005150141	-0.653832478	0.009769532	0.009889743	-2.948656406	0.254118332	5.666010489	-3.060764141	0.517899551	0.243511922	0.004411797	172	185	0.000559428	0.000186809	0.994411226	0.001217852	0.000406675	0.003097448	0.333928395	2.543369882	NO
CTRL	1617	191	1182	A	WT	WT	1	NAN	NAN	NAN	NAN	NAN	x	A05	5	A	3	1	1	1	5	18086	14665	5719	4812	-0.223702676	54	5.065083862	5.674004562	0.134562728	5.396963486	0.19146359	0.948400969	0.019483785	0.019304671	0.671836163	0.048742436	0.04870389	0.94698349	0.018220636	0.018247725	5.673739404	0.134662089	1.035602153	0.076349819	0.077259269	0.034983047	0.073770477	0.073743568	0.326162544	0.144188855	5.688036798	0.214054808	0.978777341	0.133582445	0.063985346	172	185	0.461437218	0.059760357	0.998276946	1.004529851	0.130095841	0.990876629	0.129509183	0.986408346	NO
51	2507	191	1182	A	SINGLE.SITE	WWM1_C313T	2	96	Y96	WWM1	NAN	YES	x	A06	6	A	3	1	1	1	5	18417	14131	5869	3554	-0.891439366	55	5.087649335	5.687196192	0.173763494	5.372002898	0.217506549	0.943059729	0.019605869	0.020011584	0.748874213	0.034144332	0.034131073	0.94236607	0.018817293	0.019241588	5.68757459	0.173521052	1.016599776	0.075885408	0.077777425	0.016463506	0.07495768	0.075955943	0.290054313	0.150492988	5.701871983	0.177946577	0.961790206	0.139886578	0.064628722	172	185	0.444450083	0.060403734	1.000705085	0.967549556	0.131496445	1.001544353	0.135906677	1.035134941	NO
63	2729	191	1182	A	SINGLE.SITE	TYE7_�C391T	2	134	Y134	TYE7	NAN	YES	x	A07	7	A	3	1	1	1	5	19674	15945	5977	5131	-0.342032501	54	5.05591777	5.67326703	0.15019225	5.223890339	0.176182428	0.919253882	0.017098664	0.017525475	0.745871503	0.030561293	0.030551784	0.91854354	0.017146053	0.017029103	5.673449877	0.150348759	0.928756788	0.057616292	0.057396901	-0.073908375	0.06220575	0.061344874	0.103762042	0.133800227	5.68774727	-0.008345694	0.883263147	0.123193817	0.047242485	172	185	0.365923023	0.043017496	0.998226132	0.796599377	0.093647321	0.713266011	0.117558867	0.895388613	NO
132	3229	191	1182	A	SINGLE.SITE	CIA2_G626A	2	2154	2P16H09	CIA2	B	YES	x	A08	8	A	3	1	1	1	5	18439	15132	5961	5276	0.01984427	55	5.073894469	5.687322004	0.134412776	5.266573865	0.197177002	0.923024527	0.020990822	0.020302001	0.669125998	0.044642897	0.044613275	0.921307666	0.019575406	0.019471896	5.687406829	0.134872129	0.938130222	0.06717939	0.06798987	-0.063866512	0.071567545	0.071367675	0.125377526	0.155104763	5.701704223	0.01326979	0.89164251	0.144498353	0.056623173	172	185	0.374302386	0.052398185	1.000675643	0.814840905	0.114068694	0.868805662	0.139988915	1.066227353	NO
CTRL	1617	191	1182	A	WT	WT	1	NAN	NAN	NAN	NAN	NAN	x	A09	9	A	3	1	1	1	5	18711	14983	5772	5109	-0.149860922	55	5.076425523	5.695246078	0.143652484	5.42265877	0.212760829	0.949253456	0.02126957	0.020992775	0.697919044	0.044130562	0.044101948	0.948208291	0.020181024	0.020136169	5.695407026	0.143952554	1.040758866	0.084484966	0.088717964	0.039950126	0.081686629	0.082839332	0.335740494	0.163995909	5.709704419	0.223632758	0.983387174	0.153389499	0.074179929	172	185	0.466047051	0.06995494	1.002079714	1.014565268	0.152289028	1.159911326	0.150102742	1.143259446	NO
50	2506	191	1182	A	SINGLE.SITE	WWM1_C313T	1	96	Y96	WWM1	NAN	YES	x	A10	10	A	3	1	1	1	5	18213	14596	5842	4190	-0.693018483	55	5.094441674	5.709647259	0.16096732	5.392986088	0.196196619	0.942828047	0.018091611	0.018375959	0.762489211	0.031584935	0.031574438	0.942336369	0.017459303	0.017782043	5.709671211	0.16119868	1.016479752	0.069972022	0.072039587	0.016345434	0.069211958	0.070346338	0.289822048	0.139423117	5.723968604	0.177714312	0.96168291	0.128816707	0.059500532	172	185	0.444342787	0.055275543	1.004583145	0.967315978	0.120332585	0.916514672	0.124398426	0.947482201	NO
150	3264	191	1182	A	SINGLE.SITE	NAM7_G2463	2	2142	2P15E04	NAM7	NAN	YES	x	A11	11	A	3	1	1	1	5	19026	15161	6034	4833	-0.580882066	55	5.112080906	5.713772701	0.144146931	5.511550497	0.165875925	0.962316605	0.01671107	0.01726449	0.795006876	0.029281831	0.029273467	0.961540326	0.016690193	0.016788156	5.713661907	0.144328993	1.100204181	0.078595566	0.078596665	0.095495781	0.071076341	0.071193655	0.439997053	0.130902372	5.7279593	0.327889317	1.036528191	0.120295962	0.064568379	172	185	0.519188068	0.06034339	1.005283531	1.130251077	0.131365079	1.0005438	0.116226458	0.885240297	NO
54	2524	191	1182	A	SINGLE.SITE	ADE2_G34A	2	NAN	NAN	ADE2	NAN	YES	x	B02	2	B	3	1	1	1	5	10386	7678	2383	1959	-0.858267953	55	5.098745795	5.691470502	0.083418723	5.526708787	0.107053224	0.970862294	0.011946506	0.012290576	0.842791791	0.022502182	0.022498385	0.97099377	0.011593326	0.012157976	5.691265128	0.083445067	1.146272809	0.058310518	0.060850839	0.136515643	0.051103644	0.053236792	0.513923013	0.094124857	5.711427436	0.405873268	1.080061142	0.089724763	0.052065393	172	185	0.562721019	0.047840404	1.002382112	1.225020521	0.104146593	0.793233854	0.085016203	0.647526993	NO
CTRL	1617	191	1182	A	WT	WT	1	NAN	NAN	NAN	NAN	NAN	x	B03	3	B	3	1	1	1	5	18846	15206	6170	4981	-0.425550023	55	5.074308365	5.687725999	0.139409181	5.39903652	0.190664011	0.946745665	0.018966	0.018951857	0.697928545	0.043746327	0.043718452	0.94533338	0.017689641	0.01800176	5.687964918	0.139355109	1.028732423	0.073035569	0.07555912	0.028327388	0.07119333	0.072449367	0.313258681	0.142847309	5.708127226	0.205208936	0.974558896	0.138447214	0.065731514	172	185	0.457218773	0.061506526	1.00180291	0.99534647	0.133897178	1.019829565	0.134523186	1.02459756	NO
183	2705	191	1182	A	RAP1.PAM.INS	RAP1.CONTROL	1	NAN	NAN	NAN	NAN	NAN	x	B04	4	B	3	1	1	1	5	18567	15014	5678	4889	-0.221153802	55	5.080554358	5.689196052	0.137998324	5.404231442	0.189105775	0.946281751	0.018022393	0.017827494	0.715614126	0.040544854	0.040522659	0.94521659	0.016740828	0.017036484	5.689153307	0.137636586	1.028249556	0.069138645	0.071260904	0.027857896	0.06725701	0.068493285	0.312345386	0.134844471	5.709315615	0.20429564	0.974125483	0.130444376	0.061875417	182	185	0.456785359	0.057650428	1.002055479	0.998870219	0.126066422	0.978470311	0.126209011	0.979577019	NO
42	2175	191	1182	A	EMS.MUTANT	2P18H11	1	2175	2P18H11	NAN	NAN	NAN	x	B05	5	B	3	1	1	1	5	18549	15409	6342	5030	-0.319738344	54	5.059059389	5.667793716	0.126474572	5.308983567	0.17071576	0.933843243	0.01695885	0.017476977	0.729438958	0.036064172	0.036048549	0.932769902	0.016495359	0.016833363	5.66792294	0.126757103	0.979236169	0.061891688	0.063855183	-0.020982431	0.063342744	0.064477305	0.215012246	0.133183129	5.688085247	0.1069625	0.930131902	0.128783034	0.055421744	172	185	0.412791779	0.051196755	0.998285449	0.89863073	0.111453231	0.848884954	0.124025617	0.944642694	NO
181	2701	191	1182	A	RAP1.PAM.MUT	RAP1.CONTROL	1	NAN	NAN	NAN	NAN	NAN	x	B06	6	B	3	1	1	1	5	12449	8630	1917	1780	-0.537056324	59	5.204828003	5.79694707	0.073732697	5.608626555	0.143219531	0.967295873	0.02069064	0.019015459	0.861316236	0.018281974	0.018279938	0.967102622	0.021016827	0.018967952	5.797192697	0.073513224	1.126897169	0.101633733	0.093775749	0.119467987	0.090862971	0.082351266	0.483494229	0.149535172	5.817355005	0.375444483	1.062669897	0.145135078	0.081694753	182	185	0.545329774	0.077469765	1.021017728	1.192493716	0.169406132	1.314853456	0.142060398	1.102608289	NO
CTRL	1617	191	1182	A	WT	WT	1	NAN	NAN	NAN	NAN	NAN	x	B07	7	B	3	1	1	1	5	19243	15590	6115	5033	-0.39029916	54	5.070535761	5.679375197	0.124221708	5.394738781	0.177227083	0.947486049	0.017979672	0.018023337	0.719398168	0.040160735	0.040139164	0.946918748	0.017140298	0.017319203	5.679374487	0.124206861	1.035330947	0.071466737	0.072914677	0.034721131	0.069243323	0.069846892	0.325656265	0.136149462	5.699536795	0.21760652	0.980481619	0.131749367	0.063331848	172	185	0.463141495	0.059106859	1.000295249	1.008239993	0.128673202	0.980041086	0.127621601	0.972031553	NO
185	3139	191	1182	A	NULL	NULL	1	NAN	NAN	NAN	NAN	NAN	x	B08	8	B	3	1	1	1	5	18539	15013	5790	5621	-0.19045131	53	5.058848179	5.640642404	0.128226701	2.954724791	0.202508881	0.522185463	0.033304989	0.035360456	0.583477388	-0.010866125	-0.010865697	0.522451483	0.033637345	0.035333846	5.640938944	0.128517002	0.51915665	0.005080549	0.005211	-0.65554961	0.009774531	0.010016569	-2.993679152	0.268962101	5.661101252	-3.101728898	0.517172374	0.264562006	0.004600786	172	185	-0.00016775	0.000375798	0.993549632	-0.000365185	0.000818096	0.006231037	-2.240224897	-17.06270149	NO
157	3275	191	1182	A	SINGLE.SITE	ADE2_C1477T	2	2217	2P09C10	ADE2	NAN	YES	x	B09	9	B	3	1	1	1	5	17731	13715	6289	5554	-0.493835575	52	5.063555917	5.61344856	0.13172251	5.443954177	0.165000722	0.970263676	0.013301155	0.013483458	0.838205181	0.023525377	0.023521039	0.970702292	0.012803705	0.013163017	5.613508159	0.131676451	1.144800907	0.064540988	0.06548941	0.135230742	0.056367972	0.057465218	0.511643661	0.10153102	5.633670467	0.403593915	1.078739988	0.097130926	0.056234708	172	185	0.561399865	0.05200972	0.988735402	1.222144423	0.113223022	0.862364588	0.092642915	0.705615942	NO
131	3228	191	1182	A	SINGLE.SITE	CIA2_G626A	1	2154	2P16H09	CIA2	B	YES	x	B10	10	B	3	1	1	1	5	18593	15557	6135	5266	-0.187479796	55	5.075585945	5.704154808	0.154782587	5.293660822	0.21322072	0.924499871	0.022106307	0.021215528	0.646465469	0.048742436	0.04870389	0.922524747	0.020285691	0.020105237	5.704379896	0.154930593	0.942322149	0.069962211	0.071233763	-0.059408079	0.074560982	0.074210541	0.1348951	0.160965714	5.724542204	0.026845354	0.896998508	0.15656562	0.062190422	172	185	0.379658384	0.057965433	1.004683815	0.826500693	0.126188364	0.961115287	0.152677869	1.162872934	NO
CTRL	1617	191	1182	A	WT	WT	1	NAN	NAN	NAN	NAN	NAN	x	B11	11	B	3	1	1	1	5	19035	15576	6191	5409	-0.016670425	54	5.061967204	5.665911979	0.109731663	5.372444333	0.159882084	0.944820281	0.017630907	0.017456336	0.737582904	0.036576173	0.036559875	0.94401271	0.017111161	0.016953801	5.665922219	0.11000199	1.023297728	0.070267132	0.070444656	0.023030478	0.068522629	0.067959233	0.302931041	0.134560769	5.686084527	0.194881295	0.969680806	0.130160675	0.061162323	172	185	0.452340683	0.056937334	0.997934313	0.984727068	0.123950236	0.944068554	0.125872681	0.95871088	NO
139	3247	191	1182	A	SINGLE.SITE	BRE2_G405A	1	2067	2P07D07	BRE2	NAN	YES	x	B12	12	B	3	1	1	1	5	14926	10788	3998	3380	-0.282635384	57	5.186279789	5.744750507	0.143547815	5.525701584	0.212698561	0.960891072	0.016544344	0.016680724	0.649216571	0.054253792	0.054200655	0.961052069	0.015071403	0.015097773	5.744790002	0.144303884	1.097916036	0.070269627	0.0705689	0.09341387	0.064184165	0.064038696	0.436178878	0.117981783	5.764952309	0.328129132	1.036656927	0.113581689	0.060979141	172	185	0.519316803	0.056754152	1.011775976	1.130531329	0.123551456	0.941031243	0.109286185	0.832379625	NO
170	629	170	629	A	WT	WT	1	NAN	NAN	NAN	NAN	NAN	a	C01	1	C	3	1	1	1	5	20074	16461	6126	5381	0.032200526	53	5.045898671	5.631612178	0.094548552	5.218031074	0.187144139	0.924665782	0.022795456	0.023529959	0.473769276	0.080065262	0.079894833	0.923275189	0.021919456	0.022090872	5.632098209	0.09512353	0.94492681	0.076207495	0.077475083	-0.056647804	0.080618385	0.080937028	0.140763555	0.174044741	5.650340235	0.027354525	0.89720081	0.167073354	0.066398065	170	171	0.381061484	0.062302158	1.001251368	1.014770749	0.165911304	1.057604829	0.163496341	1.042210598	NO
115	3198	191	1182	A	SINGLE.SITE	MOD5_G765A	2	2182	2P19F12	MOD5	C	YES	x	C02	2	C	3	1	1	1	5	20948	17226	7180	5662	-0.38868085	53	5.058719176	5.643310519	0.107650101	5.401023816	0.174491267	0.954121965	0.019387076	0.019555815	0.652291894	0.053484576	0.053433664	0.953239842	0.018362493	0.018476395	5.64336909	0.107804574	1.062468846	0.080374401	0.081051396	0.0605953	0.07588295	0.075929221	0.37508724	0.144043568	5.661611116	0.26167821	1.002140624	0.137072182	0.068859369	172	185	0.484800501	0.06463438	0.993639116	1.055390758	0.140706389	1.071692004	0.133321604	1.015445697	NO
6	123	190	1180	A	EMS.MUTANT	Y123	1	123	Y123	NAN	NAN	NAN	a	C03	3	C	3	1	1	1	5	19706	16704	7304	5856	0.109683566	53	5.019928646	5.617826707	0.093438329	5.288796778	0.173109036	0.940193141	0.021313505	0.022220221	0.535182778	0.07209378	0.071969265	0.938731633	0.020749613	0.021002645	5.617965462	0.093310631	1.002117912	0.081004244	0.081981389	0.002115673	0.081605617	0.081371399	0.261632998	0.163200391	5.636207488	0.148223968	0.948260192	0.156229005	0.070065274	170	171	0.432120866	0.065969368	0.998747018	1.15074242	0.175677122	1.119857226	0.152664158	0.973160637	NO
CTRL	1617	191	1182	A	WT	WT	1	NAN	NAN	NAN	NAN	NAN	x	C04	4	C	3	1	1	1	5	19626	16333	7372	5177	-0.564741405	54	5.061298031	5.666238969	0.131229153	5.388312611	0.194912727	0.947548582	0.019533388	0.020345993	0.663375231	0.050152024	0.050110039	0.946137185	0.018761748	0.019168151	5.666604229	0.131354638	1.032067748	0.077895067	0.079692361	0.031564313	0.075715536	0.076689439	0.319544439	0.149717304	5.684846255	0.20613541	0.974998968	0.142745918	0.067835258	172	185	0.457658845	0.063610269	0.997716991	0.996304489	0.13847694	1.054711383	0.138990582	1.058623537	NO
171	880	190	1180	A	NULL	NULL	1	NAN	NAN	NAN	NAN	NAN	a	C05	5	C	3	1	1	1	5	19403	15750	5364	5166	-0.124005268	52	5.046728007	5.618820766	0.091165747	2.903903442	0.190833331	0.517214391	0.032338172	0.034333022	0.360592382	0.027874534	0.027867318	0.516762282	0.032273616	0.03424443	5.618402302	0.091470076	0.518313581	0.004696198	0.004746319	-0.657174851	0.00906093	0.009145988	-3.038168723	0.256122973	5.636644328	-3.151577753	0.516326744	0.249151587	0.004122106	170	171	0.000187418	2.62E-05	0.998824427	0.000499096	6.98E-05	0.000444747	0.139791884	0.891106076	NO
128	3225	191	1182	A	SINGLE.SITE	ADE5_G1715A	2	1581	1P06E01	ADE5	NAN	YES	x	C06	6	C	3	1	1	1	5	14810	10158	4417	2905	-0.934754385	57	5.161780811	5.734291656	0.127386341	5.646241939	0.189921867	0.980932182	0.017333293	0.017374806	0.647029449	0.058229116	0.058163438	0.980839332	0.014548074	0.014559902	5.734544497	0.127192686	1.198013906	0.079653507	0.078565422	0.180665107	0.066487901	0.06578981	0.590915342	0.112520555	5.752786524	0.477506312	1.123153277	0.105549169	0.065796302	172	185	0.605813153	0.061571313	1.009640824	1.318830327	0.134038217	1.020903789	0.101634163	0.774097902	NO
167	R484	191	1182	A	RAP1.MUTANT	PLATE	1	NAN	NAN	RAP1	NAN	NAN	x	C07	7	C	3	1	1	1	5	21747	16682	8315	7702	-0.102029634	52	5.033927002	5.600548189	0.113013746	5.464192862	0.163068729	0.973116444	0.014198232	0.014836292	0.568632099	0.072222277	0.072097097	0.972616855	0.012721616	0.01261571	5.60076756	0.113459818	1.15453071	0.065174724	0.064787931	0.14369395	0.056338739	0.05586639	0.526615548	0.09895086	5.619009587	0.413206518	1.084332114	0.091979473	0.053766596	182	185	0.56699199	0.049541607	0.986205655	1.239863323	0.108334549	0.840843566	0.087376203	0.678174401	NO
CTRL	1617	191	1182	A	WT	WT	1	NAN	NAN	NAN	NAN	NAN	x	C08	8	C	3	1	1	1	5	18758	15279	5849	5182	0.042711348	54	5.067679693	5.670714228	0.112450671	5.382451119	0.163616181	0.946798124	0.017895915	0.017823819	0.738659229	0.036704176	0.036687707	0.945984764	0.01755377	0.017342026	5.670813968	0.112728333	1.031433677	0.072726532	0.073067601	0.030949753	0.070572627	0.0699586	0.318352505	0.137435143	5.689055995	0.204943475	0.974432879	0.130463757	0.061924714	172	185	0.457092755	0.057699726	0.99845582	0.995072135	0.125609931	0.956709638	0.126231985	0.961447522	NO
18	1572	191	1182	A	EMS.MUTANT	1P03E05	1	1572	1P03E05	NAN	NAN	NAN	x	C11	11	C	3	1	1	1	5	13908	10573	4179	4026	0.747377166	57	5.147283502	5.728698239	0.070383227	5.637898314	0.097973507	0.984663752	0.008173879	0.007870913	0.739190023	0.042849827	0.04282363	0.984606746	0.007278438	0.007388069	5.72861001	0.070381748	1.218890662	0.041007968	0.041514295	0.197941151	0.033669813	0.034040529	0.620376534	0.057730225	5.746852036	0.506967504	1.14179174	0.050758839	0.03258766	172	185	0.624451616	0.028362671	1.008599294	1.359405494	0.06174437	0.470276779	0.045420127	0.345942974	NO
CTRL	1617	191	1182	A	WT	WT	1	NAN	NAN	NAN	NAN	NAN	x	C12	12	C	3	1	1	1	5	19282	15305	5845	4452	-0.619023637	55	5.08302251	5.695338931	0.145233884	5.420886089	0.195977284	0.94880184	0.019086771	0.019124005	0.698192789	0.044002482	0.043974116	0.947463659	0.01781051	0.018131769	5.695465804	0.145442734	1.037617902	0.074843303	0.076830422	0.036927607	0.072041457	0.073309475	0.329917476	0.142851093	5.713707831	0.216508446	0.979954065	0.135879707	0.065245616	172	185	0.462613941	0.061020627	1.002782332	1.00709153	0.132839397	1.01177296	0.131903996	1.004648466	NO
38	2142	191	1182	A	EMS.MUTANT	2P15E04	1	2142	2P15E04	NAN	NAN	NAN	x	D01	1	D	3	1	1	1	5	20808	16234	5760	4759	-0.713508618	55	5.106720875	5.703642971	0.118278081	5.496252783	0.165494533	0.959821102	0.018698744	0.019684	0.753393885	0.03619217	0.03617638	0.95820016	0.019120976	0.019161422	5.703379851	0.118515313	1.084724142	0.087904643	0.086634842	0.081325708	0.080869886	0.079819481	0.413876943	0.148108439	5.725970917	0.301958349	1.022788756	0.144068294	0.075348666	172	185	0.505448632	0.071123677	1.00493456	1.100340891	0.154833321	1.179289966	0.140713957	1.07174965	NO
CTRL	1617	191	1182	A	WT	WT	1	NAN	NAN	NAN	NAN	NAN	x	D02	2	D	3	1	1	1	5	18900	15269	5965	4948	-0.274128491	54	5.081111176	5.68559262	0.138326772	5.403077604	0.185196626	0.947419019	0.018238203	0.0181975	0.724177061	0.039264501	0.039244342	0.94645046	0.017673987	0.017466943	5.685537601	0.138342874	1.033373345	0.073363712	0.073684944	0.032828543	0.071433641	0.070512658	0.321994248	0.138092509	5.708128667	0.210075654	0.976875133	0.134052363	0.063955439	172	185	0.459535009	0.05973045	1.001803162	1.000388821	0.130030734	0.990380746	0.129980195	0.989995814	NO
174	2003	191	1182	A	CHR2SNP.69593(T)	POLYMORPHISM	1	NAN	NAN	NAN	NAN	NAN	x	D03	3	D	3	1	1	1	5	18300	15051	6058	5356	0.109767927	55	5.07415157	5.682443833	0.131761663	5.397906132	0.18293935	0.947412847	0.017779319	0.017717102	0.725749542	0.039008446	0.038988678	0.945956313	0.017274464	0.017006236	5.682552265	0.131178591	1.031315407	0.071273718	0.071842442	0.030835081	0.069194756	0.068726168	0.318130023	0.135160772	5.705143331	0.206211429	0.975035095	0.131120626	0.062315461	172	185	0.457694972	0.058090472	1.001279222	0.996383136	0.12646057	0.963188541	0.126919621	0.966684909	NO
89	3068	191	1182	A	SINGLE.SITE	ADE5_G1715A	1	1581	1P06E01	ADE5	NAN	YES	x	D04	4	D	3	1	1	1	5	13507	9648	2727	2601	-0.513507292	59	5.18725795	5.77319016	0.073467413	5.687830277	0.114592972	0.986016633	0.011715171	0.011647207	0.667617737	0.055151292	0.055095477	0.985983009	0.01060905	0.011027268	5.77314401	0.073598928	1.226671777	0.06013659	0.06234468	0.20430463	0.048928914	0.050869872	0.631138914	0.085769117	5.795735076	0.51922032	1.149706555	0.081728972	0.053117651	172	185	0.632366432	0.048892663	1.017178495	1.376635723	0.106437317	0.810681181	0.07731698	0.588885765	NO
36	2100	191	1182	A	EMS.MUTANT	2P11C10	1	2100	2P11C10	NAN	NAN	NAN	x	D05	5	D	3	1	1	1	5	18747	15996	5235	4900	0.61515677	53	5.049697509	5.633355825	0.073205857	5.252478017	0.127192537	0.932203799	0.016356534	0.016165354	0.656176629	0.04899871	0.048959553	0.932314417	0.01612837	0.015787991	5.633305473	0.073670249	0.977531439	0.060143787	0.059738367	-0.022724825	0.061583295	0.060467557	0.211450345	0.125041254	5.655896539	0.09953175	0.926945933	0.121001109	0.051687288	172	185	0.409605809	0.0474623	0.992636181	0.891695006	0.103323475	0.786964568	0.115873112	0.882549036	NO
CTRL	1617	191	1182	A	WT	WT	1	NAN	NAN	NAN	NAN	NAN	x	D06	6	D	3	1	1	1	5	18980	15058	5799	4796	-0.425717023	54	5.081141608	5.680180899	0.126519907	5.397094047	0.179326715	0.946663367	0.019064844	0.01890073	0.711269967	0.04144118	0.041417481	0.945792478	0.018400013	0.018164342	5.680410035	0.126445474	1.030634848	0.0762226	0.076067873	0.03017497	0.074047701	0.073017058	0.316848833	0.143293754	5.7030011	0.204930239	0.974426596	0.139253608	0.066095949	172	185	0.457086473	0.06187096	1.000903251	0.995058458	0.134690536	1.025872186	0.13535942	1.030966752	NO
153	3271	191	1182	A	OFF.TARGET	TUP1_T2098del	1	94	Y94	TUP1	NAN	YES	x	D08	8	D	3	1	1	1	5	18631	14682	6058	4054	-0.764049815	55	5.077752908	5.686553602	0.143655064	5.407425745	0.184473512	0.94788277	0.018402879	0.01876258	0.720962774	0.039904661	0.0398835	0.946574555	0.017607676	0.01793207	5.68672512	0.143137884	1.033891405	0.073137804	0.07483395	0.033329746	0.071163257	0.071977756	0.322964671	0.140109823	5.709316186	0.211046077	0.977338339	0.136069678	0.064980914	172	185	0.459998216	0.060755925	1.002011578	1.001397203	0.132263151	1.007383975	0.13207861	1.005978419	NO
33	2058	191	1182	A	EMS.MUTANT	2P06D08	1	2058	2P06D08	NAN	NAN	NAN	x	D09	9	D	3	1	1	1	5	18042	15095	6139	5240	-0.188067504	55	5.082410402	5.706038506	0.135820091	5.496577503	0.161537284	0.96198556	0.016121932	0.016474577	0.791252042	0.02992155	0.029912625	0.961252435	0.016045455	0.016022717	5.706238021	0.135619827	1.098853967	0.075244512	0.07474797	0.094267788	0.068429372	0.06786581	0.437745746	0.124772976	5.728829087	0.325827152	1.035422473	0.12073283	0.064669369	172	185	0.518082349	0.060444381	1.005436183	1.127843974	0.131584932	1.002218311	0.116669446	0.888614324	NO
CTRL	1617	191	1182	A	WT	WT	1	NAN	NAN	NAN	NAN	NAN	x	D10	10	D	3	1	1	1	5	19202	15686	6308	5423	-0.187567759	54	5.076165773	5.680122394	0.124685672	5.398700227	0.170417155	0.947747343	0.017421146	0.017714934	0.736354761	0.037216202	0.037199034	0.947017607	0.017052603	0.017106886	5.680038066	0.124271106	1.03574513	0.07143113	0.072421972	0.0351211	0.069146636	0.069186284	0.326429346	0.135124959	5.702629132	0.214510752	0.978995786	0.131084814	0.062817627	172	185	0.461655662	0.058592638	1.000837968	1.005005396	0.127553765	0.971514877	0.126918488	0.966676279	NO
96	3103	191	1182	A	RAP1.MUTANT	P589.SYN	1	NAN	NAN	RAP1	NAN	NAN	x	D11	11	D	3	1	1	1	5	18944	15021	5852	4890	-0.27747498	54	5.066861438	5.670248637	0.135907423	5.384918543	0.182925543	0.946921304	0.017751063	0.017782789	0.727911504	0.038624373	0.038605183	0.946003735	0.017048802	0.017036543	5.670432015	0.135985358	1.031512556	0.070485259	0.071833242	0.031026226	0.068362855	0.06876264	0.318500861	0.135093357	5.693023081	0.206582267	0.97521137	0.131053212	0.062306523	182	185	0.457871246	0.058081534	0.999195938	1.00124477	0.127009139	0.985787248	0.126851238	0.984561695	NO
124	3215	191	1182	A	SINGLE.SITE	RPF1_G127A	1	2154	2P16H09	RPF1	B	NO	x	D12	12	D	3	1	1	1	5	18600	14861	5649	4532	-0.482626986	55	5.087041702	5.696297838	0.141701371	5.407350108	0.180707837	0.946576784	0.01850839	0.018856658	0.736040552	0.036960187	0.036943371	0.945464232	0.017626233	0.018190238	5.696909076	0.141441264	1.029273956	0.072497104	0.075667421	0.028853656	0.070513163	0.072868099	0.314281946	0.142905752	5.719500142	0.202363351	0.9732098	0.138865607	0.065742814	172	185	0.455869676	0.061517826	1.003798909	0.992409542	0.133921778	1.020016928	0.13494608	1.027818541	NO
CTRL	1617	191	1182	A	WT	WT	1	NAN	NAN	NAN	NAN	NAN	x	E01	1	E	3	1	1	1	6	19483	15866	6346	5508	-0.088715262	54	5.057487364	5.685731864	0.143787394	5.403987382	0.19489624	0.947878402	0.018935612	0.01881912	0.698420306	0.043874404	0.043846284	0.946283193	0.017651401	0.017898017	5.685556695	0.144042606	1.03267585	0.07354995	0.075471316	0.032153345	0.071417017	0.072218599	0.320686222	0.141625468	5.700173063	0.212480038	0.978023628	0.137826698	0.06591444	172	185	0.460683504	0.061689452	1.000406917	1.002889048	0.1342954	1.022862629	0.133908532	1.019916043	NO
67	2799	191	1182	A	SINGLE.SITE	CCC2_G2108A	2	135	Y135	CCC2	NAN	YES	x	E02	2	E	3	1	1	1	6	19536	15938	6228	5239	-0.140992805	53	5.039072894	5.634651558	0.111250194	5.292822943	0.174497408	0.937340963	0.018832864	0.019018251	0.690845654	0.043746327	0.043718452	0.936764296	0.018081918	0.018317445	5.634736632	0.111342015	0.994448833	0.069082207	0.071734423	-0.005566632	0.070119363	0.071253028	0.24624842	0.145015682	5.649353	0.138042237	0.943717077	0.141216912	0.062691116	172	185	0.426376953	0.058466128	0.991487759	0.928205097	0.127278356	0.96941722	0.137123095	1.044399803	NO
22	1587	191	1182	A	EMS.MUTANT	1P09E01	1	1587	1P09E01	NAN	NAN	NAN	x	E03	3	E	3	1	1	1	6	13899	10232	2863	2675	-0.749862074	59	5.174214312	5.756047015	0.07032703	5.70747905	0.107150247	0.991822607	0.009060233	0.009106442	0.635976273	0.061821304	0.061742727	0.9920427	0.008151245	0.00815699	5.756417939	0.070496973	1.261945915	0.048675481	0.04845112	0.232654906	0.038530107	0.038426451	0.678525716	0.063570487	5.771034308	0.570319533	1.183780337	0.059771717	0.040883744	172	185	0.666440214	0.036658756	1.012843395	1.450812945	0.079804604	0.607832788	0.055006819	0.418960135	NO
166	R458	191	1182	A	RAP1.MUTANT	PLATE	1	NAN	NAN	RAP1	NAN	NAN	x	E04	4	E	3	1	1	1	6	21108	16875	7708	5411	-0.774681162	54	5.062424145	5.676784116	0.139538177	5.470930627	0.155422282	0.96171281	0.015335702	0.016507174	0.840506982	0.021351143	0.021347899	0.960803442	0.015624119	0.016237021	5.676764933	0.139438931	1.096754237	0.073257485	0.074826436	0.092355125	0.066403928	0.068368456	0.434234617	0.125343279	5.691381301	0.326028434	1.035530299	0.121544509	0.065117243	182	185	0.518190175	0.060892254	0.998907786	1.133146505	0.133155448	1.033492112	0.117509473	0.912055155	NO
CTRL	1617	191	1182	A	WT	WT	1	NAN	NAN	NAN	NAN	NAN	x	E05	5	E	3	1	1	1	6	18861	15304	6166	4917	-0.445584825	55	5.073197312	5.685606504	0.137306635	5.398143211	0.186624955	0.946249202	0.018169815	0.018563787	0.69970934	0.043362104	0.043334957	0.945125096	0.017461962	0.017638843	5.685965419	0.137537954	1.02787158	0.071443039	0.073570824	0.027490237	0.069752907	0.070775213	0.3116299	0.139315092	5.700581787	0.203423716	0.973712072	0.135516322	0.064225237	172	185	0.456371948	0.060000248	1.00047865	0.993502968	0.130618074	0.994854223	0.131472253	1.001360092	NO
112	3192	191	1182	A	SINGLE.SITE	ATP23_G476A	2	2204	2P03B06	ATP23	D	YES	x	E06	6	E	3	1	1	1	6	18125	15320	6168	5326	0.859838673	52	4.99216926	5.58258602	0.087914465	5.184329368	0.132010071	0.928062231	0.014859911	0.016148604	0.685274578	0.043490177	0.043462789	0.927845967	0.014194934	0.015757056	5.582751376	0.088132849	0.961125616	0.051273727	0.056971104	-0.039650165	0.053185173	0.058897641	0.17650706	0.123489571	5.597367745	0.068300877	0.913811404	0.119690801	0.04955549	172	185	0.396471281	0.045330502	0.982364105	0.863101678	0.098682638	0.751617572	0.114334893	0.870833172	NO
69	2801	191	1182	A	SINGLE.SITE	NAM7_G1304A	2	1575	1P04G01	NAM7	NAN	YES	x	E07	7	E	3	1	1	1	6	17434	14337	5727	5278	0.26251287	55	5.087698769	5.693731344	0.106388436	5.471992472	0.13590021	0.958292821	0.015723274	0.01540078	0.87240124	0.015085289	0.015084144	0.957849663	0.015764833	0.015316517	5.693926865	0.106496983	1.08312308	0.071691006	0.070365623	0.079848609	0.066470856	0.064451255	0.41113606	0.120625217	5.708543234	0.302929876	1.023297118	0.116826447	0.061160391	172	185	0.505956994	0.056935402	1.001875921	1.101447575	0.12394603	0.944036516	0.112530122	0.857087108	NO
56	2526	191	1182	A	SINGLE.SITE	PRE7_G83A	2	1496	1P09F07	PRE7	NAN	YES	x	E08	8	E	3	1	1	1	6	18560	15158	6603	4804	-0.437224994	54	5.054752291	5.663125369	0.141334145	5.316799327	0.174164118	0.935874662	0.017049361	0.017499635	0.783813437	0.026851114	0.026844664	0.935016879	0.016947415	0.017100199	5.663024649	0.141328844	0.987735282	0.064060168	0.06541872	-0.012340551	0.064974236	0.065770342	0.23258361	0.134067636	5.677641017	0.124377427	0.93769205	0.130268866	0.057046023	172	185	0.420351927	0.052821035	0.996452438	0.915088862	0.114989221	0.875816865	0.125659076	0.957083953	NO
CTRL	1617	191	1182	A	WT	WT	1	NAN	NAN	NAN	NAN	NAN	x	E09	9	E	3	1	1	1	6	18678	15200	5894	5053	-0.222739988	55	5.07722696	5.680557591	0.124951098	5.393738362	0.175840963	0.94655613	0.018264602	0.018023651	0.708964877	0.04182534	0.041800976	0.945695154	0.017474045	0.017243134	5.680832901	0.124987731	1.030230981	0.072288626	0.071951396	0.02978303	0.070391573	0.06925739	0.316087754	0.135642488	5.695449269	0.20788157	0.975829498	0.131843718	0.062763849	172	185	0.458489375	0.05853886	0.999577869	0.998112518	0.127436692	0.970623193	0.127677682	0.972458691	NO
94	3097	191	1182	A	RAP1.MUTANT	G590.SYN	1	NAN	NAN	RAP1	NAN	NAN	x	E11	11	E	3	1	1	1	6	18634	14609	5776	4362	-0.624374928	55	5.071937147	5.683180819	0.142905138	5.403468829	0.199771599	0.947737762	0.019216426	0.019038929	0.685288237	0.046180041	0.046147255	0.946276352	0.017830241	0.01794343	5.683462048	0.143184596	1.032647341	0.074459303	0.075626357	0.032125739	0.071990598	0.072369213	0.320632723	0.141924001	5.698078416	0.21242654	0.977998043	0.138125231	0.066053677	182	185	0.46065792	0.061828689	1.000083212	1.007338496	0.135203186	1.049385724	0.134218226	1.041740912	NO
7	126	190	1180	A	EMS.MUTANT	Y126	1	126	Y126	NAN	NAN	NAN	a	E12	12	E	3	1	1	1	6	15909	13628	5594	5103	0.670415232	52	5.028263883	5.609520776	0.093759669	5.090483785	0.1630099	0.906940753	0.019252251	0.019672719	0.482341452	0.075692616	0.075548554	0.906499753	0.018111478	0.01849811	5.609430069	0.094195576	0.890199133	0.055638498	0.056049096	-0.116310097	0.062319167	0.062787376	0.009579593	0.143562145	5.624046437	-0.09862659	0.850158961	0.139763375	0.048969842	170	171	0.334019635	0.044873936	0.996592056	0.889497808	0.119499764	0.761753565	0.134345203	0.856386107	NO
107	3184	191	1182	A	SINGLE.SITE	EXG2_C379T	2	2140	2P15D07	EXG2	A	NO	x	F02	2	F	3	1	1	1	6	18903	15112	6640	4807	-0.64610991	55	5.075007801	5.68392645	0.147648144	5.40921603	0.203836392	0.948426878	0.020159245	0.020230012	0.65681036	0.05130547	0.051260525	0.94713398	0.018273378	0.018877039	5.68442536	0.147646071	1.036233097	0.075989393	0.079609701	0.035592116	0.073744064	0.076102822	0.327339382	0.148400715	5.700125946	0.216713343	0.980052461	0.144919181	0.069600377	172	185	0.462712337	0.065375388	1.000398648	1.007305734	0.142319532	1.083978533	0.141287325	1.076116711	NO
CTRL	1617	191	1182	A	WT	WT	1	NAN	NAN	NAN	NAN	NAN	x	F03	3	F	3	1	1	1	6	18444	15132	5991	5162	-0.117639001	55	5.072940155	5.683099745	0.125610337	5.39951624	0.176898975	0.947801919	0.018573623	0.01812151	0.737026015	0.037088194	0.037071202	0.946740638	0.017794589	0.017534341	5.682859897	0.125697492	1.034585541	0.074449192	0.073933028	0.034000903	0.072239776	0.070768162	0.324263441	0.138243386	5.698560483	0.213637401	0.978577447	0.134761853	0.064523338	172	185	0.461237324	0.060298349	1.000123902	1.00409469	0.131267028	0.99979699	0.130731722	0.995719826	NO
171	880	171	880	A	NULL	NULL	1	NAN	NAN	NAN	NAN	NAN	a	F05	5	F	3	1	1	1	6	17594	14370	5254	5078	-0.079159815	52	5.041543351	5.61362462	0.088411318	2.901458321	0.190263762	0.516678157	0.031676905	0.033958377	0.316383003	0.035680183	0.035665053	0.516575029	0.031458955	0.033827031	5.613197625	0.088797844	0.518286465	0.004590513	0.004729468	-0.657227168	0.008833792	0.009111165	-3.039633044	0.255587631	5.628898211	-3.150259083	0.516348575	0.252106098	0.004176491	170	171	0.000209249	8.06E-05	0.9974518	0.000557232	0.000214597	0.001367953	0.385112394	2.454906431	NO
147	3259	191	1182	A	SINGLE.SITE	FTR1_G265A	1	2100	2P11C10	FTR1	NAN	YES	x	F06	6	F	3	1	1	1	6	18782	14966	6147	4572	-0.59591328	54	5.058093533	5.664940325	0.147171889	5.310096144	0.199280656	0.934354093	0.019176358	0.01952357	0.662586216	0.047973652	0.0479369	0.933288185	0.018134716	0.018292922	5.665410241	0.147768694	0.981183325	0.068441	0.069354567	-0.018995961	0.069742366	0.069983171	0.219065217	0.144068137	5.681110827	0.108439178	0.93076786	0.140586604	0.060590814	172	185	0.413427736	0.056365825	0.997061406	0.900015184	0.122706084	0.934592454	0.136337793	1.038418541	NO
CTRL	1617	191	1182	A	WT	WT	1	NAN	NAN	NAN	NAN	NAN	x	F07	7	F	3	1	1	1	6	19129	14629	6337	3784	-0.951481299	55	5.08990522	5.68861779	0.161477113	5.412525225	0.216571301	0.948499236	0.020037306	0.020645958	0.650808919	0.05233087	0.052283179	0.946822893	0.018855297	0.019078003	5.688532598	0.161724571	1.034929656	0.078405459	0.080400705	0.034333459	0.076137795	0.076874617	0.324906676	0.150240276	5.704233184	0.214280637	0.978885524	0.146758742	0.070312605	172	185	0.461545401	0.066087616	1.001119487	1.004765361	0.143870024	1.09578787	0.143187683	1.090590811	NO
118	3203	191	1182	A	SINGLE.SITE	TRA1_G8560A	1	2013	2P01D04	TRA1	NAN	YES	x	F08	8	F	3	1	1	1	6	22190	17825	7733	5452	-0.607093018	53	5.043860754	5.634714505	0.113166536	5.382205316	0.152851293	0.953071441	0.015411157	0.017315374	0.710903277	0.042977894	0.042951462	0.951827657	0.015340889	0.016374122	5.635029029	0.112979794	1.056289121	0.067135461	0.070624828	0.054761935	0.063384555	0.066807872	0.364043955	0.126907361	5.650729615	0.253417916	0.998008087	0.123425827	0.061493945	172	185	0.480667964	0.057268957	0.991729362	1.046394395	0.124672164	0.94956713	0.119144526	0.907465804	NO
75	2911	191	1182	A	SINGLE.SITE	ADE4_G856A	2	1595	1P11B11	ADE4	NAN	YES	x	F09	9	F	3	1	1	1	6	20566	16782	8104	7836	0.211467226	51	5.040823758	5.59857987	0.100472237	5.397595911	0.148515704	0.96280627	0.013132023	0.01295143	0.495101925	0.083539818	0.083346289	0.963577461	0.010049476	0.010388049	5.598750678	0.100933945	1.109845737	0.047849007	0.049183136	0.10422103	0.043129617	0.044409563	0.455927453	0.08061969	5.614451264	0.345301414	1.045955905	0.077138157	0.042130835	172	185	0.528615782	0.037905846	0.985362342	1.150774822	0.082519469	0.628510588	0.071707746	0.546162964	NO
29	2021	191	1182	A	EMS.MUTANT	2P02B11	1	2021	2P02B11	NAN	NAN	NAN	x	F10	10	F	3	1	1	1	6	20115	15678	5742	5575	0.550881408	55	5.129986987	5.707930236	0.087148288	5.524612891	0.127726748	0.966925938	0.012508832	0.012046336	0.655785451	0.054510212	0.054456318	0.966597493	0.011583542	0.011170235	5.70816833	0.087404567	1.124424879	0.056130354	0.054825599	0.117271687	0.05027475	0.048525815	0.479544115	0.087771134	5.723868916	0.368918076	1.059008225	0.084289601	0.047136941	172	185	0.541668101	0.042911952	1.00456565	1.179189186	0.093417555	0.711516001	0.079221855	0.603394272	NO
CTRL	1617	191	1182	A	WT	WT	1	NAN	NAN	NAN	NAN	NAN	x	F11	11	F	3	1	1	1	6	19097	15133	6041	4478	-0.632128292	55	5.083248766	5.69431469	0.150413638	5.42193774	0.197923716	0.949424853	0.018403196	0.018790155	0.698131543	0.044130562	0.044101948	0.947871098	0.017162373	0.017718659	5.694447116	0.150473561	1.039334272	0.072447116	0.075790122	0.038580385	0.069793926	0.071968669	0.333103647	0.14046859	5.710147702	0.222477607	0.98282886	0.136987056	0.066171143	172	185	0.465488736	0.061946155	1.002157513	1.013349841	0.134854232	1.02711898	0.133077667	1.013587745	NO
71	2803	191	1182	A	DOUBLE.MUTANT	CHD1_G1277A_G2723A	1	54	Y54	CHD1	NAN	YES	x	F12	12	F	3	1	1	1	6	18937	15053	6429	4099	-0.823172552	55	5.087251752	5.70871911	0.164703261	5.453738668	0.198686686	0.954369727	0.01818483	0.018719244	0.73387403	0.038624373	0.038605183	0.953547792	0.017237865	0.017790088	5.708626007	0.164394601	1.063825525	0.075812793	0.078878597	0.061871397	0.071273776	0.073496796	0.377495413	0.139844919	5.724326593	0.266869373	1.00475523	0.136363385	0.068859835	172	185	0.487415106	0.064634847	1.004645974	1.061082647	0.140707404	1.071699737	0.132607393	1.010005904	NO
14	1509	191	1182	A	EMS.MUTANT	1P12D09	1	1509	1P12D09	NAN	NAN	NAN	x	G01	1	G	3	1	1	1	6	20652	16323	6667	4383	-0.908359072	56	5.100397232	5.723444178	0.174603145	5.479023635	0.220590912	0.956011751	0.02033437	0.020144984	0.704899049	0.043874404	0.043846284	0.954838305	0.018214792	0.019043771	5.723164738	0.175164421	1.069546564	0.081552175	0.085410867	0.067234786	0.076244148	0.079026918	0.387587224	0.149905591	5.733321987	0.273411637	1.008069727	0.145841829	0.074129586	172	185	0.490729604	0.069904598	1.006224708	1.068298171	0.152179435	1.15907661	0.142450338	1.084974815	NO
172	1617	172	1617	A	WT	WT	1	NAN	NAN	NAN	NAN	NAN	x	G02	2	G	3	1	1	1	6	18840	14774	6408	4198	-0.786555465	55	5.079927855	5.690604921	0.158805107	5.412421903	0.210992348	0.948693242	0.019721609	0.020047817	0.67642325	0.047845527	0.047809068	0.947560839	0.018446417	0.018739611	5.690936379	0.158521102	1.038026781	0.077524648	0.078992319	0.037321584	0.074920188	0.075515398	0.330677416	0.146759146	5.701093628	0.216501829	0.979950888	0.142695384	0.068517859	172	185	0.462610764	0.06429287	1.00056848	1.007084613	0.139962936	1.066029484	0.138978328	1.058530207	NO
CTRL	1617	191	1182	A	WT	WT	1	NAN	NAN	NAN	NAN	NAN	x	G04	4	G	3	1	1	1	6	18974	15036	6093	4445	-0.620196868	55	5.073979795	5.679891018	0.13335211	5.396412082	0.189186959	0.947730807	0.019108804	0.019181953	0.681795004	0.046820582	0.046786414	0.94634017	0.018086191	0.018084534	5.679859603	0.133560686	1.032913339	0.075331462	0.075961448	0.032383294	0.073033801	0.072814876	0.321131782	0.142481724	5.690016853	0.206956195	0.97538918	0.138417963	0.065832553	172	185	0.458049056	0.061607564	0.998624455	0.997153963	0.134117134	1.021504863	0.134499926	1.024420402	NO
26	1611	191	1182	A	EMS.MUTANT	1P15H09	1	1611	1P15H09	NAN	NAN	NAN	x	G05	5	G	3	1	1	1	6	13589	9681	2910	2797	-0.408059123	57	5.131337005	5.717444977	0.06747687	5.602813923	0.097768111	0.979456458	0.01071281	0.010921543	0.823742474	0.02723489	0.027228159	0.979442113	0.010194166	0.010784343	5.717512109	0.067378177	1.190426372	0.055494403	0.058512427	0.174311539	0.046357319	0.048920121	0.579989083	0.084721521	5.727669359	0.465813496	1.115906762	0.080657759	0.049695229	172	185	0.598566638	0.04547024	1.005232645	1.303054961	0.098986843	0.753934554	0.07596521	0.578589988	NO
3	94	190	1180	A	EMS.MUTANT	Y94	1	94	Y94	NAN	NAN	NAN	a	G06	6	G	3	1	1	1	6	19612	16136	7426	7072	0.978289826	52	5.025089787	5.607695159	0.077278482	5.258621721	0.166545155	0.937177442	0.021933279	0.020262245	0.270991451	0.118798539	0.118244352	0.937778353	0.019344204	0.018384689	5.608314802	0.078017479	0.998387097	0.075174986	0.072546094	-0.001614205	0.075424617	0.071803694	0.254178345	0.145498151	5.618472051	0.140002757	0.944588274	0.14143439	0.062910879	170	171	0.428448948	0.058814973	0.995604264	1.140964064	0.156624893	0.998408419	0.137274168	0.87505685	NO
41	2157	191	1182	A	EMS.MUTANT	2P17B12	1	2157	2P17B12	NAN	NAN	NAN	x	G07	7	G	3	1	1	1	6	13920	11116	4018	3174	0.085887844	54	5.08212168	5.645004964	0.095300497	5.339121345	0.15327017	0.945477792	0.015121606	0.015631357	0.638491125	0.054382001	0.054328486	0.945446737	0.014121129	0.014731143	5.645020389	0.09539209	1.029201519	0.058246683	0.061737139	0.028783277	0.056700483	0.059344388	0.314145131	0.116612926	5.655177639	0.199969544	0.97207786	0.112549164	0.053156485	172	185	0.454737737	0.048931496	0.99251001	0.989945357	0.106521856	0.811325072	0.107603773	0.819565511	NO
CTRL	1617	191	1182	A	WT	WT	1	NAN	NAN	NAN	NAN	NAN	x	G08	8	G	3	1	1	1	6	18766	14998	5840	4616	-0.559154884	54	5.079219271	5.687761206	0.143025667	5.404002804	0.19564666	0.948037685	0.018756235	0.018653043	0.698490553	0.043874404	0.043846284	0.9468143	0.017822669	0.017681957	5.687684058	0.142910778	1.034893696	0.074511397	0.074749108	0.034298713	0.072271563	0.071431912	0.324839479	0.139688841	5.697841308	0.210663891	0.977155859	0.135625079	0.064743844	172	185	0.459815736	0.060518855	0.999997683	1.000999951	0.13174706	1.003453164	0.131615451	1.002450762	NO
46	2217	191	1182	A	EMS.MUTANT	2P09C10	1	2217	2P09C10	NAN	NAN	NAN	x	G09	9	G	3	1	1	1	6	20713	16944	9686	7566	-0.560907296	49	4.92694774	5.491753782	0.16250572	5.280725159	0.19535846	0.962340323	0.012403065	0.012887971	0.81207047	0.027362817	0.027355991	0.962320647	0.01147064	0.012154344	5.49165282	0.162612664	1.103879227	0.054251448	0.057852726	0.098830546	0.049167448	0.052035899	0.44609917	0.09576727	5.50181007	0.331923583	1.038697941	0.091703508	0.049420467	172	185	0.521357818	0.045195478	0.965593288	1.134974533	0.098388698	0.74937877	0.086688022	0.660260427	NO
101	3162	191	1182	A	SINGLE.SITE	FTR1_G853A	2	2200	2P01A08	FTR1	NAN	YES	x	G10	10	G	3	1	1	1	6	19578	15999	5929	5339	-0.040950039	54	5.083691823	5.676297535	0.110436534	5.406581053	0.170082696	0.949442309	0.019127286	0.018759657	0.71130235	0.041953396	0.041928808	0.948500094	0.018412094	0.018160959	5.676490075	0.110900563	1.041994729	0.078562752	0.077796107	0.041136885	0.075138882	0.073834771	0.338022394	0.143478984	5.686647324	0.223846806	0.9834907	0.139415222	0.067436332	172	185	0.466150576	0.063211343	0.998033087	1.014790639	0.137608495	1.04809686	0.135602843	1.03282078	NO
193	1209	190	1180	A	m66	CIS	1	NAN	NAN	NAN	NAN	NAN	a	G11	11	G	3	1	1	1	6	18790	15298	6002	5095	-0.360285607	55	5.074487283	5.691557098	0.14002629	5.427612679	0.194529944	0.950834278	0.01934799	0.019401177	0.712782967	0.04182534	0.041800976	0.948961826	0.018414835	0.018596926	5.691555897	0.140208786	1.043956061	0.077949452	0.079471161	0.043017401	0.074972832	0.07548044	0.34163314	0.146040011	5.701713147	0.227457553	0.985240406	0.14197625	0.068923539	172	185	0.467900282	0.064698551	1.000677209	1.018599677	0.140846085	1.072756	0.138274229	1.053167425	NO
CTRL	1617	191	1182	A	WT	WT	1	NAN	NAN	NAN	NAN	NAN	x	G12	12	G	3	1	1	1	6	18740	15193	5882	5044	-0.249669348	55	5.085234506	5.694089003	0.143041938	5.415541731	0.183820612	0.948329427	0.018227091	0.017962614	0.721837773	0.039776627	0.039755669	0.9469363	0.017724542	0.017172479	5.694190575	0.143100487	1.035404459	0.074253708	0.072324396	0.034792132	0.071761571	0.069293709	0.32579352	0.135028728	5.704347825	0.211617933	0.977611511	0.130964967	0.062578903	172	185	0.460271387	0.058353915	1.001139607	1.001991886	0.127034073	0.967556636	0.126781539	0.965633205	NO
CTRL	1617	191	1182	A	WT	WT	1	NAN	NAN	NAN	NAN	NAN	x	H02	2	H	3	1	1	1	6	19167	15649	5955	5328	0.036037866	55	5.080588421	5.692030419	0.135132689	5.410380706	0.182516023	0.947697179	0.018158923	0.01780835	0.746790108	0.035296205	0.035281558	0.947009812	0.017271879	0.017240855	5.692138997	0.135741572	1.035712457	0.071700709	0.072882254	0.035089554	0.069572322	0.069683158	0.326368384	0.135992042	5.69924959	0.212575029	0.978069058	0.129691108	0.062029556	172	185	0.460728935	0.057804567	1.000244843	1.002987948	0.125838167	0.958448001	0.125463289	0.95559274	NO
191	1182	191	1182	A	GFP.MATALPHA	GFP.MATALPHA	1	NAN	NAN	NAN	NAN	NAN	x	H03	3	H	3	1	1	1	6	19258	14752	6045	3629	-0.852051359	55	5.095159231	5.700126293	0.152687827	5.170856995	0.21679716	0.905694037	0.021835261	0.02316517	0.570856125	0.058742192	0.058674765	0.904258736	0.019941818	0.021619708	5.699288005	0.15256739	0.88341677	0.059915545	0.063836048	-0.123958196	0.067908982	0.072099464	-0.007945173	0.166398048	5.706398598	-0.121738528	0.842153937	0.160097113	0.054812731	172	185	0.324813813	0.050587742	1.001499527	0.707106317	0.110127435	0.838787016	0.155743815	1.186224753	NO
74	2910	191	1182	A	SINGLE.SITE	ADE4_G856A	1	1595	1P11B11	ADE4	NAN	YES	x	H04	4	H	3	1	1	1	6	21236	16571	7712	7354	0.238293273	51	5.034390093	5.604719486	0.099745729	5.41188811	0.149300198	0.964801869	0.013016675	0.013002555	0.497306074	0.083411096	0.083218458	0.965742536	0.010144424	0.010556072	5.60473105	0.100309687	1.120262594	0.049280682	0.050910083	0.113563117	0.043864061	0.045500056	0.472858349	0.08204946	5.611841643	0.359064994	1.053525182	0.075748526	0.041945216	172	185	0.536185058	0.037720228	0.984904341	1.167252826	0.082115385	0.625432878	0.070349271	0.535816118	NO
CTRL	1617	191	1182	A	WT	WT	1	NAN	NAN	NAN	NAN	NAN	x	H06	6	H	3	1	1	1	6	18877	15222	5884	4996	-0.241094157	55	5.072953506	5.690074193	0.139887188	5.408985768	0.191807564	0.948131707	0.018776483	0.018511029	0.704313012	0.042849827	0.04282363	0.946808026	0.017726573	0.017631617	5.690175786	0.139782526	1.034867446	0.073993497	0.075064784	0.034273347	0.071532573	0.071467814	0.324790422	0.140285647	5.697286379	0.210997067	0.977314935	0.133984713	0.06398209	172	185	0.459974811	0.059757101	0.999900291	1.001346253	0.130088753	0.990822645	0.129913856	0.989490541	NO
133	3234	191	1182	A	SINGLE.SITE	ADE5_G1592A	1	1572	1P03E05	ADE5	NAN	YES	x	H07	7	H	3	1	1	1	6	13749	9567	2112	1971	-0.898136584	58	5.150418671	5.735935667	0.063337442	5.672003597	0.082453635	0.988684259	0.007772775	0.008054216	0.847141263	0.024676531	0.024671524	0.988592941	0.007311183	0.007924213	5.735998626	0.06328845	1.241659789	0.042630884	0.045536758	0.216449024	0.034338589	0.036839249	0.65154859	0.061380419	5.743109219	0.537755235	1.16186518	0.055079484	0.036467191	172	185	0.644525056	0.032242202	1.007942412	1.403104548	0.070189948	0.534602637	0.050024746	0.381014115	NO
91	3089	191	1182	A	SINGLE.SITE	RIM8_C436T	2	1480	1P06B05	RIM8	NAN	YES	x	H08	8	H	3	1	1	1	6	19380	14966	6722	4491	-0.842846178	54	5.057225192	5.644468132	0.17832411	5.343692122	0.245726544	0.944968371	0.020559055	0.02039352	0.715391501	0.040672897	0.040650491	0.944496658	0.01898547	0.019163497	5.644982351	0.177774974	1.02528271	0.07754112	0.079239452	0.024968389	0.075927387	0.076513472	0.306715511	0.150788528	5.652092945	0.192922155	0.96876111	0.144487594	0.067761638	172	185	0.451420987	0.06353665	0.991968632	0.982724928	0.138316674	1.053490711	0.140748108	1.072009756	NO
172	1617	191	1182	A	WT	WT	1	NAN	NAN	NAN	NAN	NAN	x	H09	9	H	3	1	1	1	6	19339	14767	6116	3835	-0.792788167	55	5.085840395	5.688551514	0.162144921	5.408129681	0.219766	0.948571207	0.019744101	0.020093287	0.662549826	0.050280178	0.050237871	0.947359458	0.017724197	0.018630544	5.688275045	0.162803771	1.03717982	0.075043157	0.078633772	0.036505318	0.071973727	0.075113717	0.329102616	0.146323253	5.695385638	0.215309261	0.979378595	0.140022319	0.067154203	172	185	0.462038472	0.062929215	0.999566702	1.005838756	0.136994313	1.04341893	0.13619908	1.037362027	NO
CTRL	1617	191	1182	A	WT	WT	1	NAN	NAN	NAN	NAN	NAN	x	H10	10	H	3	1	1	1	6	19851	16159	6136	5296	-0.254903606	54	5.08120938	5.699708093	0.151538399	5.417857653	0.196828791	0.948084663	0.018554506	0.01854354	0.721369501	0.039776627	0.039755669	0.947055023	0.017570262	0.017734401	5.699486241	0.151550304	1.035901969	0.073823852	0.075052354	0.035272515	0.071173211	0.071688844	0.326721935	0.139991761	5.706596834	0.21292858	0.978238187	0.133690827	0.06396518	172	185	0.460898064	0.059740192	1.001534319	1.003356135	0.130051941	0.990542267	0.129616929	0.987228993	NO
77	2916	191	1182	A	SINGLE.SITE	ADE6_G1361A	1	2038	2P04A04	ADE6	NAN	YES	x	H11	11	H	3	1	1	1	6	14386	10379	3467	3246	-0.038421261	58	5.16956715	5.742629309	0.079188538	5.71712188	0.115513365	0.995500421	0.009310779	0.009632532	0.625743308	0.064388121	0.064299361	0.99539998	0.008345009	0.008435073	5.742812289	0.079011254	1.282220702	0.050887595	0.051248572	0.248593498	0.039679817	0.040090661	0.704779662	0.065498528	5.749922882	0.590986307	1.198063457	0.059197594	0.041336572	172	185	0.680723334	0.037111584	1.009138242	1.48190671	0.080790391	0.615341047	0.054517866	0.415236022	NO
103	3175	191	1182	A	RAP1.MUTANT	F548	1	NAN	NAN	RAP1	NAN	NAN	x	H12	12	H	3	1	1	1	6	20805	16170	6611	4916	-0.736927714	53	5.035341284	5.619119429	0.11674535	5.426594208	0.154904924	0.962853758	0.01715219	0.017838692	0.824912119	0.024548622	0.024543693	0.962341323	0.01736341	0.01759312	5.619416607	0.116971298	1.103976906	0.082282509	0.081584479	0.098919029	0.074548496	0.074246435	0.446260851	0.135030107	5.6265272	0.332467496	1.038991144	0.128729173	0.069411925	182	185	0.521651021	0.065186936	0.987525089	1.140714471	0.142546796	1.106383484	0.124962731	0.969903962	NO
CTRL	1617	191	1182	A	WT	WT	1	NAN	NAN	NAN	NAN	NAN	x	A01	1	A	1	1	2	2	7	20574	16238	6305	4986	-0.51386812	55	5.083558187	5.698026122	0.150636351	5.438121294	0.202288625	0.951459105	0.020240129	0.020049945	0.676643834	0.048229907	0.048192563	0.950181239	0.019133578	0.018900825	5.698456047	0.150693165	1.049170022	0.082167697	0.081382879	0.047999397	0.078306128	0.076975962	0.351168956	0.148133745	5.708840058	0.219161382	0.981229621	0.133638167	0.064339754	172	185	0.463889498	0.060114766	1.001928015	1.009868364	0.130867374	0.996753022	0.129588547	0.98701282	NO
172	1617	172	1617	A	WT	WT	1	NAN	NAN	NAN	NAN	NAN	x	A02	2	A	1	1	2	2	7	19755	15687	5878	4769	-0.541717558	55	5.085347216	5.701193968	0.154154485	5.437254169	0.204015659	0.951718966	0.020214084	0.020131199	0.665061921	0.050280178	0.050237871	0.950145286	0.018649617	0.018861454	5.700517749	0.15382004	1.049015582	0.080106551	0.081103165	0.047852183	0.076442828	0.076756286	0.350887802	0.147666117	5.71090176	0.218880229	0.98109428	0.133170539	0.064096593	172	185	0.463754156	0.059871604	1.002289853	1.009573731	0.130338021	0.992721198	0.129102033	0.983307278	NO
83	2954	191	1182	A	SINGLE.SITE	ADE6_G3327A	2	1587	1P09E01	ADE6	NAN	YES	x	A03	3	A	1	1	2	2	7	14960	10170	2675	2455	-0.869068074	59	5.180727998	5.757369454	0.082955347	5.723370282	0.120960171	0.993093395	0.010202366	0.010576324	0.645291265	0.060409903	0.060336578	0.993251621	0.009087868	0.0095103	5.7575125	0.083275455	1.2691854	0.054842072	0.057000732	0.238375277	0.042972463	0.044937896	0.687979484	0.074084343	5.767896511	0.55597191	1.174036656	0.059588765	0.040177992	172	185	0.656696533	0.035953004	1.012292698	1.429601352	0.078268211	0.596130825	0.054748277	0.416990949	NO
17	1565	191	1182	A	EMS.MUTANT	1P01D03	1	1565	1P01D03	NAN	NAN	NAN	x	A04	4	A	1	1	2	2	7	14596	10553	3368	3157	-0.380260383	58	5.174086248	5.751840859	0.074992679	5.719679246	0.106755784	0.994104307	0.008793223	0.009228317	0.648112038	0.06015331	0.060080914	0.993952989	0.007942211	0.008224398	5.751973855	0.075256883	1.27341694	0.048094392	0.049630747	0.241703791	0.037762619	0.038986047	0.693464184	0.064152684	5.762357866	0.56145661	1.1777449	0.049657107	0.033665667	172	185	0.660404777	0.029440679	1.01132064	1.437674046	0.064091148	0.488151044	0.044579749	0.339542224	NO
CTRL	1617	191	1182	A	WT	WT	1	NAN	NAN	NAN	NAN	NAN	x	A05	5	A	1	1	2	2	7	19907	16048	6491	5283	-0.410802955	55	5.078840064	5.694642047	0.144497685	5.42956173	0.197884983	0.950775777	0.020637434	0.020175173	0.69509163	0.044899073	0.044868938	0.949781119	0.01910352	0.019264328	5.694258816	0.144805331	1.047453709	0.081677323	0.082505775	0.04636218	0.078245522	0.078240223	0.348040018	0.15064828	5.704642827	0.216032445	0.979725557	0.136152703	0.065345589	172	185	0.462385433	0.0611206	1.001191381	1.006594078	0.133057034	1.013430597	0.132185393	1.006791734	NO
68	2800	191	1182	A	SINGLE.SITE	NAM7_G1304A	1	1575	1P04G01	NAM7	NAN	YES	x	A06	6	A	1	1	2	2	7	19068	15285	7348	4788	-0.771864329	55	5.103394894	5.698902683	0.144039186	5.508488644	0.19013847	0.963352297	0.019205219	0.020028571	0.71769561	0.043105963	0.043079294	0.961600928	0.018892409	0.019043004	5.698912681	0.14409158	1.100488795	0.088561766	0.089443113	0.09575444	0.080782844	0.080739052	0.440470964	0.148896499	5.709296692	0.308463391	1.026202025	0.134400922	0.070751313	172	185	0.508861902	0.066526325	1.002008156	1.107771438	0.144825073	1.103062018	0.130735519	0.995748744	NO
55	2525	191	1182	A	SINGLE.SITE	PRE7_G83A	1	1496	1P09F07	PRE7	NAN	YES	x	A08	8	A	1	1	2	2	7	19247	15010	6407	4244	-0.714653918	55	5.07120861	5.679014748	0.157867293	5.337624902	0.186614196	0.936917568	0.018449147	0.019169733	0.756092881	0.031840855	0.031830101	0.935964376	0.018287661	0.018598857	5.679218438	0.157936821	0.991364162	0.070449764	0.071823834	-0.008673343	0.070803813	0.07180932	0.239993038	0.146107538	5.689602449	0.107985465	0.93057236	0.131611961	0.056697141	172	185	0.413232237	0.052472152	0.998551725	0.899589589	0.114229719	0.870032108	0.126979814	0.967143371	NO
CTRL	1617	191	1182	A	WT	WT	1	NAN	NAN	NAN	NAN	NAN	x	A09	9	A	1	1	2	2	7	19421	15471	6051	5311	-0.197373157	55	5.077681504	5.695166348	0.137521366	5.433385757	0.193721178	0.950947636	0.019866837	0.019300356	0.722954765	0.040032697	0.040011332	0.949436799	0.01902446	0.018596266	5.695212286	0.138052039	1.045981041	0.081729418	0.079873464	0.04495524	0.078155662	0.075690665	0.345347434	0.146235133	5.705596297	0.213339861	0.978435007	0.131739555	0.063057511	172	185	0.461094884	0.058832523	1.00135872	1.003784604	0.128075983	0.975492361	0.127593094	0.971814429	NO
129	3226	191	1182	A	SINGLE.SITE	ADE5_G2081A	1	1597	1P11D07	ADE5	NAN	YES	x	A10	10	A	1	1	2	2	7	14290	10494	3417	3269	-0.087061061	57	5.149748795	5.730530344	0.069202929	5.649592827	0.093493729	0.986103638	0.007859336	0.007922443	0.809504752	0.030817198	0.030807447	0.986160942	0.007229302	0.00767491	5.730570506	0.069234956	1.2276839	0.041058769	0.043352638	0.205129386	0.033604036	0.035434263	0.632530348	0.059558367	5.740954517	0.500522774	1.137667466	0.04506279	0.028744891	172	185	0.620327343	0.024519902	1.007564252	1.35042712	0.053378819	0.406560459	0.03952736	0.301060644	NO
185	3139	191	1182	A	NULL	NULL	1	NAN	NAN	NAN	NAN	NAN	x	A11	11	A	1	1	2	2	7	19800	16125	6482	6240	-0.2794039	54	5.073073481	5.662610524	0.156996408	2.960946196	0.199738274	0.521582975	0.031542563	0.033647872	0.501314772	0.003579304	0.003579289	0.521350255	0.031370202	0.033643698	5.662629281	0.156805843	0.518990521	0.004755551	0.004842359	-0.655869659	0.009155199	0.009318365	-3.002290758	0.252096583	5.673013292	-3.134298331	0.516615109	0.237601006	0.003999522	172	185	-0.000725015	-0.000225466	0.995640251	-0.001578327	-0.000490831	-0.003738419	0.31098168	2.368595933	NO
106	3183	191	1182	A	SINGLE.SITE	EXG2_C379T	1	2140	2P15D07	EXG2	A	NO	x	A12	12	A	1	1	2	2	7	20399	16396	6379	5409	-0.343146739	55	5.084138551	5.699413627	0.152740688	5.442653766	0.207622292	0.95241213	0.020047828	0.020222686	0.68045091	0.047717403	0.047681236	0.950659364	0.018741447	0.019102459	5.699617173	0.152971212	1.051227996	0.080722453	0.082873076	0.049959001	0.076703852	0.078058521	0.354907897	0.15028326	5.710001184	0.222900324	0.983033095	0.135787682	0.065619523	172	185	0.465692971	0.061394534	1.002131798	1.013794452	0.133653376	1.017972646	0.131834788	1.004121342	NO
161	R128	191	1182	A	RAP1.MUTANT	PLATE	1	NAN	NAN	RAP1	NAN	NAN	x	B02	2	B	1	1	2	2	7	21953	17823	7710	6599	-0.129023004	52	5.016724305	5.587639138	0.113687589	5.346785098	0.151728892	0.955451746	0.014899907	0.015298665	0.791120546	0.029409773	0.029401298	0.955067156	0.014675301	0.01494894	5.587621571	0.113735359	1.070567138	0.065796826	0.06647512	0.068188544	0.061316793	0.061961095	0.389376844	0.116462633	5.603870497	0.261427261	1.002014574	0.108173371	0.054328172	182	185	0.48467445	0.050103183	0.983548558	1.059856373	0.109562569	0.850374898	0.103374921	0.802349186	NO
CTRL	1617	191	1182	A	WT	WT	1	NAN	NAN	NAN	NAN	NAN	x	B03	3	B	1	1	2	2	7	19506	15639	5983	4978	-0.436467733	55	5.078894853	5.688935685	0.136283054	5.42310573	0.188186346	0.95044146	0.019407271	0.019251152	0.728524918	0.039008446	0.038988678	0.949032427	0.018664476	0.018547483	5.688961543	0.136051629	1.044256581	0.07936776	0.079809065	0.043305227	0.075954245	0.075522969	0.342185239	0.146580012	5.705210469	0.214235656	0.978863974	0.13829075	0.066252582	172	185	0.461523851	0.062027593	1.001291005	1.004718448	0.13503152	1.028469294	0.134397373	1.023639305	NO
172	1617	191	1182	A	WT	WT	1	NAN	NAN	NAN	NAN	NAN	x	B04	4	B	1	1	2	2	7	19028	15313	5749	4843	-0.319367331	54	5.068741522	5.68200962	0.131622031	5.412428625	0.186536638	0.949428399	0.018938341	0.0194242	0.700861349	0.043746327	0.043718452	0.947759599	0.018359261	0.018625188	5.682166684	0.13202589	1.038864029	0.077062818	0.079180304	0.038127836	0.074012337	0.075402263	0.332231724	0.146879929	5.69841561	0.20428214	0.974119079	0.138590667	0.065738668	172	185	0.456778956	0.061513679	1.000098476	0.994389007	0.133912751	1.019948176	0.134668374	1.025703391	NO
37	2140	191	1182	A	EMS.MUTANT	2P15D07	1	2140	2P15D07	NAN	NAN	NAN	x	B06	6	B	1	1	2	2	7	18693	15005	5861	4434	-0.499346073	53	5.050727635	5.632919179	0.125598395	5.182349018	0.20254313	0.918730156	0.021050266	0.022243055	0.575555192	0.060923112	0.060847905	0.918214823	0.020145293	0.020799622	5.633327097	0.125993676	0.927655497	0.066728387	0.070981641	-0.075094847	0.072556482	0.075165614	0.101191477	0.165894057	5.649576022	-0.026758106	0.876266943	0.157604795	0.059335805	172	185	0.35892682	0.055110816	0.991526901	0.78136893	0.119973981	0.913783359	0.153543322	1.169464671	NO
CTRL	1617	191	1182	A	WT	WT	1	NAN	NAN	NAN	NAN	NAN	x	B07	7	B	1	1	2	2	7	18618	15708	6092	5334	-0.002798445	54	5.068209609	5.670811552	0.110037689	5.386026959	0.167360724	0.947403165	0.018897955	0.018611576	0.701504844	0.043362104	0.043334957	0.946833258	0.018246421	0.017954241	5.671051094	0.109991174	1.034973035	0.075830656	0.075298958	0.034375373	0.073352088	0.072262835	0.324987733	0.140695522	5.68730002	0.197038149	0.970695403	0.13240626	0.062351859	172	185	0.453355279	0.058126871	0.998147638	0.986935803	0.126539808	0.963792063	0.128214832	0.976549903	NO
191	1182	191	1182	A	GFP.MATALPHA	GFP.MATALPHA	1	NAN	NAN	NAN	NAN	NAN	x	B08	8	B	1	1	2	2	7	19477	15720	5888	5347	0.342125231	54	5.077240736	5.67535025	0.101448915	5.150639794	0.180588427	0.905593273	0.023786165	0.023605405	0.620235654	0.050280178	0.050237871	0.904154074	0.023598009	0.02303492	5.675586117	0.101049182	0.883102911	0.070106902	0.068660516	-0.124313538	0.079836426	0.07724956	-0.008763628	0.179120275	5.691835042	-0.136713211	0.837065224	0.170831013	0.057618405	172	185	0.3197251	0.053393416	0.998943555	0.696028398	0.116235272	0.885307434	0.166997888	1.271941542	NO
102	3174	191	1182	A	RAP1.MUTANT	F548	1	NAN	NAN	RAP1	NAN	NAN	x	B09	9	B	1	1	2	2	7	21399	17320	7589	6232	-0.247382142	52	5.011970179	5.580291881	0.115519819	5.324209381	0.15372414	0.952455695	0.014804833	0.015181073	0.826886953	0.022502182	0.022498385	0.952280202	0.014780328	0.014957733	5.58037665	0.115803198	1.058262031	0.064172057	0.06488046	0.056627969	0.061001517	0.061272335	0.367582851	0.116173321	5.596625576	0.239633268	0.991187337	0.107884059	0.053014784	182	185	0.473847214	0.048789795	0.982276984	1.036180036	0.106690533	0.828083458	0.102965246	0.799169477	NO
65	2795	191	1182	A	SINGLE.SITE	SDS23_G676A	2	1487	1P07H05	SDS23	NAN	YES	x	B10	10	B	1	1	2	2	7	19124	15496	5993	5050	-0.360024387	55	5.089152616	5.69618421	0.140506253	5.480649279	0.181279561	0.959030461	0.018356841	0.018558095	0.722244458	0.041569232	0.041545313	0.957675791	0.018022858	0.017685848	5.69624171	0.140525777	1.082330459	0.082134116	0.080919149	0.079116549	0.075846274	0.074168045	0.409776375	0.13890548	5.712490635	0.281826792	1.012365093	0.130616218	0.066951642	172	185	0.49502497	0.062726654	1.002568708	1.077649006	0.136553346	1.040060301	0.12671412	0.965119714	NO
CTRL	1617	191	1182	A	WT	WT	1	NAN	NAN	NAN	NAN	NAN	x	B11	11	B	1	1	2	2	7	19858	15555	6385	4841	-0.623428396	55	5.085956683	5.689184503	0.144121184	5.430296018	0.199524182	0.951662395	0.020375035	0.02029151	0.693308322	0.045411442	0.045380265	0.950335515	0.019256806	0.019269524	5.689098789	0.144335582	1.049833223	0.082931644	0.082831868	0.048631316	0.07842728	0.078402626	0.35237539	0.150589419	5.705347715	0.224425807	0.983770848	0.142300157	0.068871664	172	185	0.466430725	0.064646676	1.001315092	1.015400511	0.140733155	1.071895872	0.138598665	1.0556385	NO
14	1509	191	1182	A	EMS.MUTANT	1P12D09	1	1509	1P12D09	NAN	NAN	NAN	x	B12	12	B	1	1	2	2	7	20069	15751	5256	4694	-0.44616645	55	5.097010588	5.718053877	0.147721689	5.47799331	0.184579997	0.956235941	0.019875339	0.019442203	0.780021545	0.030817198	0.030807447	0.955231365	0.019200869	0.019007788	5.717819079	0.147510663	1.071300563	0.085776211	0.084644946	0.06887339	0.080132623	0.07865938	0.390660961	0.148105377	5.734068005	0.262711377	1.002659913	0.139816115	0.070310412	172	185	0.485319789	0.066085423	1.006355637	1.056521228	0.143865249	1.095751505	0.13616882	1.037131556	NO
185	3139	191	1182	A	NULL	NULL	1	NAN	NAN	NAN	NAN	NAN	x	C01	1	C	1	1	2	2	7	19600	15915	5949	5756	0.047377969	54	5.059064802	5.660852202	0.123133785	2.947433722	0.200938312	0.51971065	0.030690213	0.033185028	0.335117946	0.032608642	0.032597092	0.518974107	0.029481907	0.032947693	5.66056128	0.123287407	0.518636897	0.004387786	0.004692939	-0.656551261	0.008457472	0.009034637	-3.020872246	0.248899917	5.674889924	-3.154181114	0.516283728	0.238039363	0.00392802	172	185	-0.001056395	-0.000296969	0.995969608	-0.002299728	-0.000646489	-0.004923994	0.2811155	2.141119788	NO
185	3139	185	3139	A	NULL	NULL	1	NAN	NAN	NAN	NAN	NAN	x	C02	2	C	1	1	2	2	7	18932	15768	5887	5715	-0.101278334	54	5.065440095	5.65703959	0.113058811	2.943988875	0.195048019	0.519320133	0.030397828	0.032595376	0.382618341	0.024164899	0.024160197	0.518534098	0.029833324	0.032483264	5.656929494	0.113181415	0.518572132	0.004350069	0.004702711	-0.656676144	0.008401921	0.009048142	-3.024313115	0.250277863	5.671258139	-3.157621983	0.516227046	0.239417309	0.003937187	172	185	-0.001113077	-0.000287801	0.995332213	-0.002423123	-0.000626532	-0.004771988	0.258563783	1.969354354	NO
119	3204	191	1182	A	SINGLE.SITE	TRA1_G8560A	2	2013	2P01D04	TRA1	NAN	YES	x	C03	3	C	1	1	2	2	7	21774	18081	7030	5719	-0.162789538	53	5.03443265	5.625500742	0.093255267	5.365433695	0.135727435	0.952139939	0.015079871	0.016225627	0.737019038	0.038240312	0.038221688	0.951509246	0.015103201	0.015736775	5.625546244	0.09342754	1.054905152	0.06560968	0.067737423	0.053450859	0.062208383	0.064181873	0.361553971	0.122022373	5.639874889	0.228245104	0.985622879	0.111161819	0.054006937	172	185	0.468282756	0.049781948	0.989824307	1.019432306	0.108373255	0.825426275	0.106307456	0.809692091	NO
CTRL	1617	191	1182	A	WT	WT	1	NAN	NAN	NAN	NAN	NAN	x	C04	4	C	1	1	2	2	7	19042	15563	6256	5546	0.008194131	55	5.066492513	5.687153807	0.13737373	5.432656679	0.181058848	0.951517918	0.018655994	0.018540907	0.731855167	0.038624373	0.038605183	0.950114966	0.017890675	0.017861317	5.687447127	0.137566259	1.048885372	0.077119968	0.077334348	0.047728049	0.073413814	0.072992552	0.350650698	0.140837548	5.701775771	0.217341831	0.9803544	0.129976994	0.062463333	172	185	0.463014276	0.058238345	1.0006882	1.007963042	0.126782482	0.965640394	0.125780884	0.958011706	NO
1	54	190	1180	A	EMS.MUTANT	Y54	1	54	Y54	NAN	NAN	NAN	a	C05	5	C	1	1	2	2	7	17962	15619	6147	5677	1.178075087	52	5.006398209	5.598710642	0.078743287	5.160438517	0.142047985	0.921872638	0.016775739	0.016485015	0.406557305	0.092041787	0.091783184	0.921990915	0.014492951	0.015042783	5.598611684	0.079068713	0.940478585	0.049702631	0.052796176	-0.0613664	0.05291538	0.055413737	0.130720528	0.119801692	5.612940329	-0.002588339	0.885477351	0.108941139	0.042018072	170	171	0.369338025	0.037922165	0.994624032	0.983551052	0.100987126	0.643744396	0.102676039	0.654510403	NO
110	3190	191	1182	A	SINGLE.SITE	CCC2_G2159A	1	2140	2P15D07	CCC2	A	YES	x	C06	6	C	1	1	2	2	7	19151	15107	5933	4565	-0.554298095	54	5.05990934	5.659932355	0.136898419	5.353262086	0.211051965	0.943242547	0.021195022	0.021175687	0.60495724	0.059768436	0.059697419	0.941717131	0.018994638	0.019503165	5.660072916	0.136980669	1.013983719	0.076627282	0.078986448	0.013886849	0.075332077	0.077055738	0.284979599	0.1536099	5.67440156	0.151670732	0.949808657	0.142749346	0.064240986	172	185	0.432468533	0.060015998	0.995883898	0.941466216	0.130652359	0.995115362	0.138775409	1.056984675	NO
74	2910	191	1182	A	SINGLE.SITE	ADE4_G856A	1	1595	1P11B11	ADE4	NAN	YES	x	C07	7	C	1	1	2	2	7	21175	16963	8220	7720	0.146019528	51	5.020088844	5.58954638	0.107641228	5.383883556	0.156952799	0.962417134	0.012765729	0.012689638	0.525673521	0.078135788	0.077977357	0.963429922	0.009713045	0.010021078	5.589457703	0.108023582	1.109142281	0.046120975	0.047455334	0.103586997	0.041630077	0.042850132	0.454773702	0.077877323	5.603786348	0.321464834	1.033090929	0.067016769	0.03574063	172	185	0.515750805	0.031515641	0.9834906	1.122768298	0.068608255	0.52255565	0.061106334	0.465417176	NO
CTRL	1617	191	1182	A	WT	WT	1	NAN	NAN	NAN	NAN	NAN	x	C08	8	C	1	1	2	2	7	19310	15708	6344	5326	-0.240594727	55	5.070246284	5.67824333	0.127000421	5.413969117	0.185560648	0.950396917	0.018814548	0.019097137	0.678718372	0.047845527	0.047809068	0.948726878	0.017870291	0.018102792	5.67842978	0.126919928	1.042957173	0.076153362	0.077679448	0.042060114	0.072761301	0.073634701	0.33979585	0.143009984	5.692758425	0.206486983	0.975166071	0.13214943	0.062821711	172	185	0.457825948	0.058596723	0.999105613	0.996668265	0.127562656	0.971582598	0.127989082	0.974830475	NO
176	2005	191	1182	A	CHR2SNP.69593(T)	POLYMORPHISM	2	NAN	NAN	NAN	NAN	NAN	x	C09	9	C	1	1	2	2	7	18696	15397	5878	5329	0.187184627	54	5.077619731	5.678736837	0.114356919	5.406003367	0.164084447	0.94838801	0.018205918	0.017890756	0.750130603	0.034912237	0.034898063	0.947681652	0.017620314	0.01743667	5.678881571	0.114563825	1.038535532	0.074385133	0.07425576	0.037811578	0.07120778	0.070718465	0.331622174	0.137828858	5.693210215	0.198313307	0.971296274	0.126968304	0.059867346	172	185	0.453956151	0.055642357	0.999184905	0.988243876	0.121131124	0.922596752	0.122572097	0.93357194	NO
10	333	190	1180	A	EMS.MUTANT	Y333	1	333	Y333	NAN	NAN	NAN	a	C10	10	C	1	1	2	2	7	16826	13812	4894	4325	0.421801862	52	5.023467068	5.601156806	0.090076842	5.287217054	0.145780982	0.94329831	0.015668225	0.017577538	0.668131121	0.04912685	0.049087385	0.943050248	0.015537406	0.017030181	5.601082945	0.090436546	1.019372299	0.063107952	0.069004265	0.019187045	0.062052343	0.06736622	0.29540458	0.13280519	5.615411589	0.162095712	0.954524714	0.121944636	0.055453413	170	171	0.438385388	0.051357507	0.995061944	1.167424907	0.136765583	0.871814862	0.117151503	0.746784531	NO
92	3091	191	1182	A	SINGLE.SITE	SSN2_C2911T	1	89	Y89	SSN2	NAN	YES	x	C11	11	C	1	1	2	2	7	23239	18967	9310	8406	0.321552246	53	5.053861297	5.637092278	0.108803544	5.407492876	0.181663365	0.958163602	0.019718727	0.02054614	0.503202051	0.080708551	0.080533991	0.957277044	0.018100039	0.018769252	5.637009262	0.108858103	1.080516784	0.082687708	0.084902432	0.077439431	0.076456777	0.07823354	0.406658172	0.146198332	5.651337906	0.273349304	1.008038045	0.135337778	0.06878622	172	185	0.490697922	0.064561232	0.99183612	1.0682292	0.140547148	1.070479142	0.131570217	1.002106235	NO
CTRL	1617	191	1182	A	WT	WT	1	NAN	NAN	NAN	NAN	NAN	x	C12	12	C	1	1	2	2	7	19662	15696	5901	4995	-0.357738236	54	5.085811998	5.687522719	0.135365692	5.42662348	0.191494362	0.950795527	0.020439019	0.020520347	0.688145493	0.046180041	0.046147255	0.949123685	0.019435373	0.01960278	5.687650051	0.135102464	1.044645279	0.082862838	0.083957415	0.043677382	0.079176478	0.079590934	0.34289888	0.154089007	5.701978695	0.209590012	0.976643493	0.143228453	0.068300109	172	185	0.459303369	0.064075121	1.000723814	0.999884551	0.139488903	1.062419008	0.139505009	1.062541678	NO
32	2053	191	1182	A	EMS.MUTANT	2P05G06	1	2053	2P05G06	NAN	NAN	NAN	x	D01	1	D	1	1	2	2	7	21612	17561	6925	5828	-0.274429647	53	5.042212707	5.626494858	0.104431195	5.21800215	0.17171862	0.926171705	0.019988792	0.020164414	0.640386217	0.050792811	0.050749198	0.925459858	0.0195557	0.019364712	5.626547417	0.104654275	0.952597048	0.068620897	0.068893982	-0.04856329	0.0724589	0.071661525	0.157847675	0.152146022	5.6452251	0.026029243	0.896674467	0.144216709	0.057238501	172	185	0.379334344	0.053013512	0.990763294	0.82579527	0.115408236	0.879008301	0.139754053	1.064438527	NO
CTRL	1617	191	1182	A	WT	WT	1	NAN	NAN	NAN	NAN	NAN	x	D02	2	D	1	1	2	2	7	18813	15604	5932	5123	-0.163888491	54	5.074112612	5.666596596	0.104418939	5.386932152	0.155676191	0.948574222	0.017561738	0.017759759	0.715920581	0.041057032	0.041033986	0.947809314	0.017303922	0.01720352	5.666733561	0.104863801	1.03907365	0.072982843	0.072424564	0.038329595	0.070244442	0.069379204	0.332620498	0.13429577	5.685411244	0.200802066	0.972471221	0.126366457	0.05973204	172	185	0.455131097	0.055507052	0.997816149	0.990801686	0.120836569	0.920353271	0.121958381	0.928897563	NO
172	1617	191	1182	A	WT	WT	1	NAN	NAN	NAN	NAN	NAN	x	D03	3	D	1	1	2	2	7	19570	15445	6115	4662	-0.604407114	55	5.078535628	5.681815845	0.132982078	5.411091667	0.194423214	0.950082965	0.020007001	0.020114335	0.674593484	0.048486169	0.048448227	0.948630825	0.018414122	0.019018451	5.682167665	0.133061596	1.042549328	0.077884177	0.080789859	0.041668991	0.074688187	0.076932045	0.339044715	0.148848099	5.700845349	0.207226283	0.975517653	0.140918786	0.067040066	172	185	0.458177529	0.062815078	1.000524906	0.997433643	0.136745841	1.041526445	0.137097683	1.044206251	NO
123	3210	191	1182	A	SINGLE.SITE	ADE5_G479A	2	2146	2P15G08	ADE5	NAN	YES	x	D04	4	D	1	1	2	2	7	13293	9685	2446	2326	-0.738524058	57	5.143433536	5.72998115	0.065549829	5.629707691	0.089799955	0.982075597	0.009727292	0.010046831	0.858268328	0.021606924	0.021603563	0.982034632	0.009622219	0.009962922	5.729888383	0.065471869	1.204571051	0.053208853	0.054608658	0.186123529	0.043828475	0.045398113	0.600262593	0.077482293	5.748566066	0.468444161	1.117529713	0.06955298	0.042966182	172	185	0.600189589	0.038741194	1.008900114	1.30658806	0.084337986	0.642361346	0.06454826	0.491632647	NO
156	3274	191	1182	A	SINGLE.SITE	ADE2_C1477T	1	2217	2P09C10	ADE2	NAN	YES	x	D05	5	D	1	1	2	2	7	19015	15469	5478	5048	0.087118071	54	5.072233143	5.654698151	0.088515301	5.38939115	0.152438527	0.951471328	0.020651417	0.020468339	0.696856313	0.045027163	0.04499677	0.95141837	0.020608699	0.020084574	5.654889118	0.088840128	1.054510797	0.089773568	0.088843991	0.05307696	0.084914292	0.082827451	0.360843328	0.160157575	5.673566801	0.229024896	0.986001882	0.152228263	0.074016381	172	185	0.468661758	0.069791393	0.995737394	1.020257379	0.151932993	1.157199577	0.148916338	1.134223188	NO
CTRL	1617	191	1182	A	WT	WT	1	NAN	NAN	NAN	NAN	NAN	x	D06	6	D	1	1	2	2	7	18263	14857	5627	4765	-0.247522766	54	5.069272349	5.672502395	0.116086143	5.403839173	0.173645514	0.94941323	0.019056936	0.018763534	0.731042585	0.038496351	0.038477351	0.948222588	0.018285145	0.018181189	5.672775781	0.116130796	1.040819352	0.076536207	0.077603848	0.040008242	0.074100624	0.07377632	0.335852298	0.143435333	5.691453464	0.204033867	0.974001329	0.13550602	0.06425955	172	185	0.456661205	0.060034562	0.998876587	0.994132668	0.130692773	0.995423171	0.131464116	1.001298119	NO
98	3109	191	1182	A	RAP1.MUTANT	P589.LARGE	1	NAN	NAN	RAP1	NAN	NAN	x	D07	7	D	1	1	2	2	7	19520	16252	5841	5124	-0.026313994	53	5.059107798	5.646602201	0.083736142	5.365174318	0.145883296	0.947941661	0.017498102	0.01781014	0.587266687	0.063874691	0.063788034	0.947743301	0.016612609	0.016899987	5.646964348	0.083979606	1.038795327	0.070099931	0.070920049	0.038061702	0.067480605	0.068055494	0.332104273	0.131573875	5.665642031	0.200285841	0.97222727	0.123644562	0.058415267	182	185	0.454887146	0.054190278	0.994390226	0.994719323	0.118499978	0.919743011	0.119129061	0.92462566	NO
192	2884	190	1180	A	TATA.22	CIS	1	NAN	NAN	NAN	NAN	NAN	a	D09	9	D	1	1	2	2	7	18706	14723	5670	4343	-0.657858015	55	5.105061554	5.706832953	0.146385792	5.461073629	0.19437858	0.955224525	0.017855029	0.01911954	0.682909275	0.047717403	0.047681236	0.953669262	0.017174375	0.017928883	5.707203603	0.146362565	1.064361563	0.075648797	0.078682544	0.062375148	0.071111412	0.07369732	0.37844531	0.139364889	5.725881286	0.246626878	0.994636079	0.131435576	0.065041408	172	185	0.477295956	0.060816419	1.00491883	1.039053672	0.132394845	1.008387023	0.127418678	0.970485982	NO
CTRL	1617	191	1182	A	WT	WT	1	NAN	NAN	NAN	NAN	NAN	x	D10	10	D	1	1	2	2	7	19529	15536	5864	4708	-0.52644916	55	5.082106382	5.690949238	0.140529648	5.423508828	0.194071622	0.950656951	0.019374653	0.019417248	0.695867554	0.044770984	0.044741106	0.949128576	0.017898336	0.018439172	5.691175407	0.140325008	1.044666119	0.076390002	0.079044804	0.043697331	0.072918714	0.074947672	0.342937127	0.145067229	5.70985309	0.211118695	0.97737302	0.137137916	0.065495813	172	185	0.460032896	0.061270825	1.002105807	1.001472701	0.133384066	1.015921441	0.13318792	1.014427493	NO
34	2067	191	1182	A	EMS.MUTANT	2P07D07	1	2067	2P07D07	NAN	NAN	NAN	x	D11	11	D	1	1	2	2	7	15902	12730	3877	3399	-0.073536405	54	5.105023653	5.674463391	0.081248034	5.413512667	0.135866868	0.952638254	0.016298098	0.016112448	0.598922838	0.062334602	0.062254054	0.952349095	0.015400931	0.015352444	5.674873382	0.081536946	1.058562988	0.06721689	0.067600518	0.056912317	0.063652944	0.063333169	0.368121593	0.120978596	5.693551065	0.236303161	0.989553628	0.113049283	0.055368312	172	185	0.472213504	0.051143323	0.999244726	1.027989384	0.111336912	0.84799901	0.108305508	0.82491028	NO
39	2146	191	1182	A	EMS.MUTANT	2P15G08	1	2146	2P15G08	NAN	NAN	NAN	x	D12	12	D	1	1	2	2	7	13897	9887	2321	2196	-0.813099857	57	5.13273821	5.722641325	0.062798776	5.632049632	0.093555124	0.983028884	0.011170065	0.011208071	0.835225931	0.025827751	0.02582201	0.982753966	0.011160511	0.011105411	5.722585516	0.062766808	1.208546809	0.061358296	0.061472891	0.189418648	0.051059152	0.050791041	0.605887804	0.086732447	5.741263199	0.474069372	1.121014465	0.078803134	0.048955052	172	185	0.603674342	0.044730063	1.007618427	1.314174222	0.097375508	0.741661801	0.074096346	0.564355767	NO
CTRL	1617	191	1182	A	WT	WT	1	NAN	NAN	NAN	NAN	NAN	x	E01	1	E	1	1	2	2	8	19954	16043	6172	5295	-0.231667974	54	5.062515689	5.673810402	0.119985682	5.413088434	0.178482694	0.9516622	0.018939674	0.018746676	0.707813777	0.042977894	0.042951462	0.950100818	0.018076006	0.018024021	5.674081181	0.12005447	1.048824626	0.077462406	0.07803923	0.047670133	0.073879523	0.073631938	0.350540064	0.142136968	5.697114717	0.226922091	0.984980531	0.133133755	0.064596279	172	185	0.467640407	0.060371291	0.999870163	1.01803394	0.131425818	1.001006416	0.129097678	0.983274109	NO
27	2012	191	1182	A	EMS.MUTANT	2P01C08	1	2012	2P01C08	NAN	NAN	NAN	x	E04	4	E	1	1	2	2	8	19090	15653	5862	5112	-0.157801021	54	5.077172092	5.659260938	0.090930564	5.231678531	0.148969728	0.923335183	0.01668166	0.01718279	0.548048158	0.066313787	0.066216837	0.922734535	0.015840487	0.016011208	5.659237706	0.090811565	0.943048752	0.054720909	0.055385595	-0.0586373	0.058085349	0.058495649	0.136535645	0.124948729	5.682271242	0.012917672	0.891504553	0.115945515	0.045418453	172	185	0.374164429	0.041193465	0.997265064	0.814540579	0.089676479	0.683022044	0.11009455	0.838536546	NO
CTRL	1617	191	1182	A	WT	WT	1	NAN	NAN	NAN	NAN	NAN	x	E05	5	E	1	1	2	2	8	17852	14926	5824	5132	0.035928763	54	5.070155716	5.679031126	0.122036914	5.411883064	0.176766287	0.949581878	0.018642354	0.018157547	0.732413959	0.038240312	0.038221688	0.948126446	0.017781647	0.017560617	5.679403797	0.122364273	1.040412739	0.075080438	0.075190382	0.039617499	0.072211365	0.071399893	0.335100471	0.139079043	5.702437333	0.211482498	0.9775468	0.13007583	0.06214563	172	185	0.460206677	0.057920642	1.000804307	1.001851014	0.126090855	0.960372607	0.125857891	0.958598229	NO
43	2182	191	1182	A	EMS.MUTANT	2P19F12	1	2182	2P19F12	NAN	NAN	NAN	x	E06	6	E	1	1	2	2	8	18590	15131	5212	4483	0.00071274	53	5.053132638	5.63379355	0.082800585	5.407749411	0.14636293	0.958655506	0.018216496	0.018071244	0.629882064	0.058357382	0.05829127	0.958113886	0.017643478	0.017357593	5.633678696	0.082922275	1.084329637	0.080580656	0.078833437	0.08096195	0.074282514	0.072562088	0.41320228	0.134862337	5.656712232	0.289584307	1.016356926	0.125859124	0.065015646	172	185	0.499016803	0.060790657	0.992779339	1.086339063	0.132338762	1.007959865	0.121820862	0.927850153	NO
152	3268	191	1182	A	SINGLE.SITE	NAP1_G1034A	2	1523	1P16A09	NAP1	NAN	YES	x	E08	8	E	1	1	2	2	8	19114	15559	6637	4886	-0.558124079	54	5.060474441	5.664676755	0.120940488	5.399478852	0.19355075	0.951592988	0.021220077	0.021327451	0.617384189	0.058998741	0.058930429	0.949998496	0.019756555	0.019953486	5.664580152	0.120585433	1.048385479	0.084609481	0.085406375	0.047251342	0.080644484	0.080937711	0.349739903	0.155679659	5.687613688	0.22612193	0.984592449	0.146676445	0.071110248	172	185	0.467252326	0.066885259	0.998202688	1.017189103	0.14560646	1.109013457	0.14314591	1.090272648	NO
CTRL	1617	191	1182	A	WT	WT	1	NAN	NAN	NAN	NAN	NAN	x	E09	9	E	1	1	2	2	8	19718	15187	6739	3704	-0.905956675	54	5.081972112	5.655264763	0.170110073	5.366504205	0.236443213	0.947093227	0.021258679	0.021695422	0.676514104	0.047845527	0.047809068	0.946612022	0.019023274	0.020228998	5.655579482	0.170524453	1.03404792	0.079664573	0.083785848	0.03348112	0.076755606	0.080707641	0.323257668	0.156824293	5.678613018	0.199639695	0.9719221	0.14782108	0.069792234	172	185	0.454581976	0.065567245	0.996623029	0.989606272	0.142737197	1.08715968	0.14423635	1.098578001	NO
76	2915	191	1182	A	SINGLE.SITE	ADE6_G1055A	1	1565	1P01D03	ADE6	NAN	YES	x	E10	10	E	1	1	2	2	8	13031	9975	4151	3990	0.917837843	56	5.14879677	5.719023265	0.074197443	5.629453944	0.101275719	0.984792553	0.009820237	0.009930124	0.740465806	0.042721761	0.042695799	0.985018154	0.009476213	0.009498761	5.718861776	0.0743443	1.221207912	0.053617465	0.053516338	0.199840461	0.043816396	0.043786569	0.623593746	0.074181354	5.741895313	0.499975773	1.137318637	0.06517814	0.041553441	172	185	0.619978514	0.037328453	1.007729366	1.349667734	0.081262506	0.618936917	0.060209268	0.458584659	NO
80	2919	191	1182	A	SINGLE.SITE	ADE6_G3327A	1	1587	1P09E01	ADE6	NAN	YES	x	E11	11	E	1	1	2	2	8	13701	9670	2525	2316	-0.843971928	59	5.186362359	5.764382016	0.071737365	5.721548047	0.101332147	0.99248873	0.008643695	0.009101347	0.67235823	0.055535962	0.055478972	0.992663069	0.008180182	0.008280893	5.7643897	0.071862055	1.265652379	0.049109997	0.049374303	0.235587704	0.038618469	0.039066575	0.683377011	0.064468239	5.787423236	0.559759038	1.176594985	0.055465025	0.03753944	172	185	0.659254862	0.033314451	1.015719729	1.435170729	0.072524191	0.552381423	0.050533493	0.384888997	NO
148	3260	191	1182	A	SINGLE.SITE	FTR1_G265A	2	2100	2P11C10	FTR1	NAN	YES	x	E12	12	E	1	1	2	2	8	19655	15435	6679	4222	-0.90204808	53	5.080330377	5.656759668	0.179121981	5.259906705	0.253912374	0.927711906	0.02363144	0.023980325	0.559126894	0.06515833	0.065066352	0.927161348	0.02087623	0.021218767	5.656819176	0.180003338	0.958662311	0.074407685	0.076409234	-0.042216393	0.077819456	0.078869815	0.171153337	0.166512403	5.679852712	0.047535363	0.905302526	0.157509189	0.063873182	172	185	0.387962403	0.059648193	0.996840601	0.8445782	0.129851665	0.989016861	0.153747355	1.171018694	NO
178	2007	191	1182	A	CHR2SNP.69593(T)	POLYMORPHISM	3	NAN	NAN	NAN	NAN	NAN	x	F01	1	F	1	1	2	2	8	19342	15879	6202	5406	-0.13140047	54	5.067865758	5.668024631	0.113069987	5.39074175	0.169454964	0.948389103	0.019175249	0.019015369	0.709144547	0.042209512	0.042184472	0.947435703	0.018394669	0.018375665	5.668004756	0.1128636	1.037500332	0.077842231	0.077929349	0.036814293	0.074797204	0.074305877	0.329698853	0.144926013	5.69212251	0.203661024	0.973824552	0.136240036	0.06458355	172	185	0.456484429	0.060358562	0.998994007	0.993747834	0.131398108	1.000795363	0.132224799	1.007091869	NO
5	103	190	1180	A	EMS.MUTANT	Y103	1	103	Y103	NAN	NAN	NAN	a	F02	2	F	1	1	2	2	8	17417	14221	5323	4672	0.230583903	52	5.029953077	5.61705174	0.093431091	5.080720261	0.188132914	0.903979222	0.024470879	0.024873534	0.440515636	0.082510115	0.082323636	0.903631484	0.023559825	0.023668366	5.617562167	0.093719403	0.881539607	0.06923087	0.071856216	-0.126085347	0.079269007	0.080080764	-0.012850286	0.188224798	5.64167992	-0.138888115	0.836332463	0.179538821	0.060423842	170	171	0.320193137	0.056327936	0.999716744	0.852677698	0.150001886	0.956189937	0.175918623	1.121396677	NO
CTRL	1617	191	1182	A	WT	WT	1	NAN	NAN	NAN	NAN	NAN	x	F03	3	F	1	1	2	2	8	18491	14830	5957	4750	-0.444323975	55	5.073926494	5.682081417	0.134409086	5.407924308	0.190985126	0.94940107	0.020047789	0.020021798	0.674626766	0.048358037	0.048320395	0.948267639	0.01887839	0.018980485	5.682213489	0.134645647	1.041009993	0.079635287	0.080138093	0.040191389	0.076589054	0.076566683	0.336204598	0.14806721	5.706331242	0.210166769	0.976918605	0.139381233	0.066503864	172	185	0.459578481	0.062278876	1.001487706	1.000483459	0.135578552	1.032635768	0.135513037	1.032136773	NO
160	R120	191	1182	A	RAP1.MUTANT	PLATE	1	NAN	NAN	RAP1	NAN	NAN	x	F04	4	F	1	1	2	2	8	4344	3426	1740	1048	-0.792489962	52.5	4.956164838	5.572477189	0.169657531	5.117367421	0.194571159	0.918622546	0.016517762	0.017193721	0.789666099	0.023141673	0.023137544	0.917655144	0.015218148	0.016746938	5.572504854	0.169523034	0.92578694	0.05050439	0.05734264	-0.077111168	0.05456863	0.06078391	0.096814834	0.13460563	5.596622607	-0.029222995	0.875340093	0.125919653	0.047290123	182	185	0.35799997	0.043065134	0.982276463	0.782852385	0.094172195	0.730921807	0.120293681	0.933664917	NO
104	3176	191	1182	A	RAP1.MUTANT	F548	1	NAN	NAN	RAP1	NAN	NAN	x	F05	5	F	1	1	2	2	8	22448	18029	6994	5491	-0.502964342	52	5.010455359	5.588429705	0.095132025	5.291590826	0.149163753	0.945222576	0.016321777	0.017169266	0.596152876	0.062462931	0.062381885	0.945296679	0.015895626	0.016110078	5.58876396	0.095165997	1.028580636	0.065864715	0.067170421	0.028179829	0.063914506	0.064700909	0.312971681	0.127024615	5.612881713	0.186933852	0.965961114	0.118338638	0.055166981	182	185	0.44862099	0.050941992	0.985130137	0.981016878	0.111396826	0.864611565	0.113552405	0.881342192	NO
134	3235	191	1182	A	SINGLE.SITE	ADE5_G1592A	2	1572	1P03E05	ADE5	NAN	YES	x	F06	6	F	1	1	2	2	8	13127	9342	4097	2020	-1.078294122	58	5.146853437	5.733935178	0.079447372	5.6623441	0.094652877	0.986767792	0.00887221	0.009743981	1.018286201	-0.00549682	-0.005496764	0.986650487	0.008954634	0.009729089	5.733904156	0.079396475	1.230475831	0.051468654	0.054315675	0.207400949	0.041713981	0.044660345	0.636358599	0.074334401	5.75802191	0.51032077	1.143948182	0.065648424	0.042288483	172	185	0.626608059	0.038063494	1.010559659	1.364099981	0.082862662	0.631124525	0.0607453	0.462667351	NO
CTRL	1617	191	1182	A	WT	WT	1	NAN	NAN	NAN	NAN	NAN	x	F07	7	F	1	1	2	2	8	18946	15253	6267	4764	-0.628356589	55	5.079588925	5.68237119	0.132953679	5.422803979	0.191800428	0.951142789	0.020310593	0.020204717	0.685818838	0.046692471	0.046658582	0.949757505	0.019613442	0.019198523	5.68279851	0.133204891	1.047352586	0.083032162	0.082489729	0.046265631	0.080055609	0.078106339	0.34785536	0.150646798	5.706916264	0.22181753	0.982510117	0.141960821	0.068528455	172	185	0.465169994	0.064303467	1.00159038	1.012655951	0.139986003	1.066205178	0.138236489	1.052879981	NO
142	3251	191	1182	A	SINGLE.SITE	NAM7_G2462A	2	2058	2P06D08	NAM7	NAN	YES	x	F09	9	F	1	1	2	2	8	18257	14489	5685	4958	-0.418341973	56	5.119784118	5.718534488	0.141539571	5.535547278	0.170473319	0.96607021	0.018402397	0.018973895	0.723961341	0.042337573	0.042312303	0.964305164	0.018155046	0.018076456	5.718379412	0.141367836	1.113327288	0.086973419	0.087261449	0.107353088	0.078431175	0.077663515	0.461618097	0.142224992	5.742497165	0.335580268	1.040672194	0.133539015	0.07222992	172	185	0.523332071	0.068004932	1.007834994	1.139272401	0.148043941	1.127578564	0.129946043	0.989735697	NO
60	2699	191	1182	A	SINGLE.SITE	CHD1_G1277A	1	54	Y54	CHD1	NAN	YES	x	F10	10	F	1	1	2	2	8	18309	15138	5774	4977	-0.276935923	55	5.081476111	5.70790556	0.157516065	5.454718363	0.196012461	0.954121363	0.018858078	0.018489498	0.731464836	0.039008446	0.038988678	0.953033862	0.0178214	0.017688607	5.70775819	0.15751402	1.061563221	0.07852495	0.078574518	0.059742558	0.073893795	0.073170038	0.373476478	0.139866801	5.731875943	0.247438649	0.99503795	0.131180823	0.064968061	172	185	0.477697827	0.060743072	1.00597092	1.039928528	0.13223517	1.007170861	0.127157941	0.968500078	NO
CTRL	1617	191	1182	A	WT	WT	1	NAN	NAN	NAN	NAN	NAN	x	F11	11	F	1	1	2	2	8	19200	14996	6242	4385	-0.739428866	55	5.086569924	5.694036296	0.158636981	5.438796997	0.210504277	0.952190554	0.019714823	0.020098784	0.674649353	0.048742436	0.04870389	0.950715499	0.018379596	0.018732782	5.69390122	0.158549958	1.051470118	0.078551065	0.081228787	0.050189298	0.074833468	0.076542411	0.355346869	0.147236835	5.718018974	0.229309039	0.986140058	0.138550858	0.067385302	172	185	0.468799934	0.063160313	1.003538957	1.020558182	0.137497406	1.047250743	0.13472765	1.026154864	NO
171	880	171	880	A	NULL	NULL	1	NAN	NAN	NAN	NAN	NAN	a	F12	12	F	1	1	2	2	8	19459	15871	4770	4598	0.103209187	52	5.045591729	5.617618298	0.074839882	2.888179494	0.189178667	0.514002235	0.03220429	0.034824332	0.135706156	0.067341008	0.067239491	0.513284621	0.032089207	0.034558925	5.617061315	0.075477519	0.517816405	0.004513331	0.004646422	-0.658134531	0.008722212	0.008962237	-3.065364043	0.257644582	5.641179069	-3.191401872	0.515680818	0.248958605	0.003958104	170	171	-0.000458508	-0.000137802	0.999627992	-0.001221012	-0.000366968	-0.002339248	0.300544559	1.915827128	NO
143	3253	191	1182	A	SINGLE.SITE	IRA2_G7496A	1	2157	2P17B12	IRA2	NAN	YES	x	G01	1	G	1	1	2	2	8	16773	13958	6685	5895	-0.301369928	53	5.024221786	5.617180735	0.182703315	5.311247242	0.240200072	0.944379927	0.016953291	0.017631264	0.641066885	0.05399738	0.053944991	0.943322496	0.014512456	0.015153487	5.617379071	0.182749274	1.020479676	0.05879911	0.062457784	0.020272788	0.057842795	0.060548744	0.297533564	0.119950228	5.635953488	0.167946187	0.957192971	0.110682023	0.050627152	172	185	0.439852847	0.046402164	0.989136083	0.957541564	0.101015602	0.769386624	0.105494744	0.803502065	NO
61	2700	191	1182	A	SINGLE.SITE	CIT2_C-385T	1	103	Y103	CIT2	NAN	YES	x	G02	2	G	1	1	2	2	8	16710	13006	5102	3783	-0.659235107	55	5.08096257	5.687464749	0.137414025	5.414970007	0.193086129	0.948812043	0.019785855	0.019898185	0.689807524	0.045539538	0.045508097	0.94786128	0.01915856	0.018920195	5.687470176	0.13769267	1.039292847	0.080104198	0.080185147	0.038540527	0.077680546	0.076471477	0.333026868	0.148625692	5.706044593	0.203439491	0.973719548	0.139357487	0.066046721	172	185	0.456379425	0.061821733	1.001437398	0.993519243	0.134583371	1.025055958	0.135461262	1.03174243	NO
179	2008	191	1182	A	CHR2SNP.69593(PolyG_T)	POLYMORPHISM	2	NAN	NAN	NAN	NAN	NAN	x	G03	3	G	1	1	2	2	8	18130	14577	5680	4747	-0.304211707	54	5.072652072	5.679277048	0.120812412	5.412223595	0.173714989	0.949801398	0.01829978	0.018179758	0.763881118	0.03273661	0.032724923	0.948842823	0.017929023	0.01772452	5.679377985	0.12086967	1.043449887	0.075982491	0.075711485	0.042532422	0.072849665	0.071978768	0.340702538	0.139260587	5.697952402	0.211115161	0.977371332	0.129992382	0.062082952	172	185	0.460031209	0.057857964	1.000017181	1.001469027	0.125954409	0.959333359	0.125769649	0.957926139	NO
CTRL	1617	191	1182	A	WT	WT	1	NAN	NAN	NAN	NAN	NAN	x	G04	4	G	1	1	2	2	8	17452	14067	5529	4654	-0.275107732	54	5.076669736	5.678603042	0.119057488	5.410815163	0.170654501	0.950069125	0.018285833	0.018214002	0.735098445	0.037856261	0.037838193	0.949030987	0.01782416	0.017617296	5.678543152	0.11891823	1.044250452	0.076090207	0.07532177	0.043299357	0.072663934	0.071568486	0.342173982	0.138340051	5.697117569	0.212586605	0.978074595	0.129071846	0.061734086	172	185	0.460734472	0.057509097	0.999870664	1.003000002	0.12519494	0.953548861	0.124820479	0.950696769	NO
105	3177	191	1182	A	RAP1.MUTANT	F548	1	NAN	NAN	RAP1	NAN	NAN	x	G06	6	G	1	1	2	2	8	21101	17360	7439	6502	-0.077031109	52	5.024424094	5.595484097	0.102974586	5.322162419	0.142283942	0.950061234	0.014659745	0.014922282	0.760439383	0.033888373	0.033875409	0.950158237	0.014633066	0.01451002	5.595669285	0.10309999	1.04907121	0.06296298	0.062347853	0.04790521	0.05990096	0.059188401	0.35098908	0.113506457	5.614243702	0.221401703	0.982309427	0.104238252	0.050297798	182	185	0.464969304	0.046072809	0.985369183	1.016766367	0.100749194	0.781969485	0.099087851	0.769074893	NO
86	2996	191	1182	A	SINGLE.SITE	ADE6_G1055A	2	1565	1P01D03	ADE6	NAN	YES	x	G07	7	G	1	1	2	2	8	12700	8868	2576	2368	-0.644197675	58	5.159002068	5.740492958	0.078062353	5.673129219	0.096378061	0.988182488	0.009375583	0.009746066	0.864882249	0.021479033	0.021475731	0.98799406	0.009102071	0.009622943	5.740499079	0.07804043	1.238193521	0.052442004	0.055171225	0.213653476	0.042321382	0.044671157	0.646865351	0.074716113	5.759073496	0.517277974	1.148445402	0.065447908	0.042453651	172	185	0.631105279	0.038228663	1.010744217	1.373890244	0.083222227	0.63386315	0.060574145	0.461363746	NO
CTRL	1617	191	1182	A	WT	WT	1	NAN	NAN	NAN	NAN	NAN	x	G08	8	G	1	1	2	2	8	18726	14366	6308	3834	-0.872261277	54	5.086739515	5.678084779	0.157846776	5.406067288	0.214253623	0.949213696	0.020229875	0.0206709	0.686272116	0.046308146	0.046275087	0.947730015	0.018935695	0.019437225	5.678387884	0.157767	1.038739336	0.080310209	0.081418035	0.038007797	0.07726644	0.078080656	0.332000391	0.151065874	5.696962301	0.202413014	0.973233312	0.141797669	0.067134268	172	185	0.455893188	0.062909279	0.999843413	0.992460727	0.136950914	1.043088387	0.137991268	1.051012255	NO
190	1180	190	1180	A	GFP.MATA	GFP.MATA	1	NAN	NAN	NAN	NAN	NAN	a	G09	9	G	1	1	2	2	8	18924	15233	6209	5023	-0.430945273	55	5.078415903	5.692077193	0.132500828	5.185598811	0.196478575	0.908436733	0.023229555	0.023212532	0.630991024	0.048742436	0.04870389	0.906520914	0.021938631	0.022385636	5.692356138	0.132069839	0.890263742	0.067188628	0.067960068	-0.116237521	0.075503708	0.075857992	0.009745066	0.17404168	5.710930555	-0.119842311	0.842803764	0.164773475	0.056520859	172	185	0.32546364	0.052295871	1.002294907	0.708520963	0.11384596	0.867109209	0.160681146	1.223829997	NO
169	R65	191	1182	A	RAP1.MUTANT	PLATE	1	NAN	NAN	RAP1	NAN	NAN	x	G10	10	G	1	1	2	2	8	10599	8762	4287	2772	-0.692897879	52	4.985892528	5.596879014	0.154637564	5.147938984	0.211164433	0.917361053	0.019012306	0.019914062	0.68971977	0.040672897	0.040650491	0.917002876	0.017665459	0.018864832	5.597424119	0.154712697	0.923619513	0.058063807	0.064335791	-0.079455075	0.063079891	0.068226281	0.091714047	0.151793589	5.615998536	-0.03787333	0.872105402	0.142525384	0.053065511	182	185	0.354765279	0.048840522	0.985677178	0.775778961	0.10680146	0.828944425	0.137669962	1.068531717	NO
28	2013	191	1182	A	EMS.MUTANT	2P01D04	1	2013	2P01D04	NAN	NAN	NAN	x	G11	11	G	1	1	2	2	8	21815	18247	6454	5545	-0.096791205	52	5.025346754	5.6122433	0.078894079	5.352909594	0.122253752	0.953265587	0.013948478	0.014265266	0.719968942	0.041569232	0.041545313	0.953419646	0.013597493	0.013859314	5.612353342	0.078937073	1.063260579	0.060112728	0.060911641	0.061340205	0.05655092	0.057157967	0.376493311	0.108099335	5.630927759	0.246905934	0.99477419	0.098831129	0.04892062	172	185	0.477434067	0.044695632	0.988254044	1.039354334	0.097300552	0.741090896	0.093616343	0.713030073	NO
64	2794	191	1182	A	SINGLE.SITE	SDS23_G676A	1	1487	1P07H05	SDS23	NAN	YES	x	H01	1	H	1	1	2	2	8	19222	15029	5521	4786	-0.395453035	54	5.077294816	5.676457655	0.117405757	5.454424076	0.166918706	0.959039412	0.016653458	0.017227808	0.739063076	0.038752396	0.038733015	0.958002976	0.01640367	0.016595401	5.676576347	0.11752553	1.083822867	0.075161122	0.07532222	0.080494483	0.069464673	0.069374994	0.412334961	0.128967418	5.692104107	0.283129816	1.013033436	0.11746204	0.06028754	172	185	0.495693313	0.056062552	0.998990778	1.079103962	0.122045871	0.92956393	0.11309927	0.861422035	NO
CTRL	1617	191	1182	A	WT	WT	1	NAN	NAN	NAN	NAN	NAN	x	H02	2	H	1	1	2	2	8	18681	14773	4939	4301	-0.116761474	54	5.07664949	5.670378534	0.09772818	5.398184882	0.150686818	0.949415128	0.017589906	0.017520079	0.744917623	0.036064172	0.036048549	0.948713434	0.017378065	0.017137929	5.670597165	0.097782318	1.042900069	0.073465026	0.073332525	0.04200536	0.070556372	0.06968703	0.339690714	0.135021376	5.686124926	0.210485569	0.97707074	0.123515998	0.058952774	172	185	0.459730617	0.054727785	0.997941403	1.000814651	0.119140138	0.907432381	0.119043159	0.906693742	NO
170	629	170	629	A	WT	WT	1	NAN	NAN	NAN	NAN	NAN	a	H05	5	H	1	1	2	2	8	18991	15179	5741	4852	-0.182305432	53	5.039826137	5.620372925	0.088015259	5.183133125	0.198487928	0.920766767	0.025377109	0.026162068	0.284384421	0.11322778	0.112747588	0.920457763	0.024024247	0.023961211	5.620852227	0.088931486	0.935226512	0.081281713	0.08072081	-0.066966521	0.087110844	0.085782235	0.118731277	0.185375726	5.636379988	-0.010473868	0.8824479	0.173870348	0.066534223	170	171	0.366308574	0.062438317	0.998777585	0.975483594	0.166273896	1.059916176	0.170452785	1.086554589	NO
CTRL	1617	191	1182	A	WT	WT	1	NAN	NAN	NAN	NAN	NAN	x	H06	6	H	1	1	2	2	8	18016	15307	5813	5341	0.475889629	54	5.062057409	5.668742712	0.09644573	5.387265216	0.149778738	0.947738355	0.017639929	0.01731029	0.778120786	0.02992155	0.029912625	0.947005426	0.017285655	0.017043729	5.668811473	0.096398096	1.035694079	0.072418924	0.072213791	0.035071809	0.06980548	0.06897609	0.326334091	0.13474937	5.684339234	0.197128946	0.970738162	0.123243992	0.058042496	172	185	0.453398038	0.053817508	0.997628006	0.987028888	0.117158502	0.892339221	0.118698148	0.904065962	NO
2	89	190	1180	A	EMS.MUTANT	Y89	1	89	Y89	NAN	NAN	NAN	a	H08	8	H	1	1	2	2	8	17088	14173	5818	5341	0.556577582	51	5.003533828	5.579169436	0.089219954	5.232787802	0.17736936	0.937664896	0.019955068	0.020134175	0.219109677	0.128792507	0.128087396	0.937951736	0.016118623	0.017034291	5.579344988	0.089917769	0.999063594	0.062956725	0.066106492	-0.000936845	0.063020359	0.065973044	0.255534204	0.132403268	5.594872748	0.126329059	0.938547524	0.12089789	0.053045805	170	171	0.422408197	0.048949899	0.991422421	1.124877482	0.130354096	0.830944717	0.115882928	0.738697974	NO
CTRL	1617	191	1182	A	WT	WT	1	NAN	NAN	NAN	NAN	NAN	x	H10	10	H	1	1	2	2	8	19566	15242	6306	4149	-0.829001989	55	5.092061182	5.691213264	0.160683845	5.419845097	0.219377262	0.949943482	0.020628317	0.020201348	0.6966002	0.044514811	0.044485443	0.948631349	0.01863031	0.01903607	5.69186535	0.160835229	1.042551551	0.079047482	0.081824827	0.041671122	0.075963113	0.077424971	0.339048809	0.150754318	5.707393111	0.209843664	0.976764465	0.13924894	0.066419279	172	185	0.459424341	0.06219429	1.001674069	1.000147902	0.135394412	1.031233268	0.13537439	1.03108077	NO
125	3221	191	1182	A	SINGLE.SITE	ADE5_G713A	1	1611	1P15H09	ADE5	NAN	YES	x	H12	12	H	1	1	2	2	8	14433	10144	2152	2026	-1.012042031	58	5.14280955	5.734304467	0.066244248	5.650543066	0.089195141	0.985101199	0.011196951	0.010936875	0.911794598	0.01278387	0.012783173	0.9849967	0.011157959	0.010909642	5.734241452	0.066310372	1.221086888	0.06292123	0.061373463	0.199741354	0.051691826	0.050240041	0.623425975	0.085086734	5.749769213	0.49422083	1.133660189	0.073581357	0.046641604	172	185	0.616320065	0.042416616	1.009111272	1.341703442	0.092339229	0.703302912	0.068822383	0.52418656	NO
CTRL	1617	191	1182	A	WT	WT	1	NAN	NAN	NAN	NAN	NAN	x	A01	1	A	2	1	2	2	9	19340	15186	5895	4752	-0.495786839	55	5.078008373	5.690106994	0.147020228	5.427050129	0.203413512	0.951525726	0.019956655	0.019834787	0.68438263	0.046948695	0.046914246	0.950423285	0.018605129	0.018765628	5.689769871	0.147313612	1.050210888	0.079648289	0.081072177	0.048990989	0.075934076	0.076550115	0.353061754	0.14728915	5.697912492	0.224476898	0.983795577	0.132997699	0.064372669	172	185	0.466455453	0.06014768	1.000010176	1.015454343	0.130939027	0.99729877	0.128946248	0.982120739	NO
173	2002	191	1182	A	CHR2SNP.69593(T_G)	POLYMORPHISM	1	NAN	NAN	NAN	NAN	NAN	x	A02	2	A	2	1	2	2	9	19734	16113	6210	5369	-0.168815182	54	5.069913228	5.679861974	0.128199773	5.419000241	0.177451068	0.950405744	0.019558334	0.019276425	0.744112192	0.03632017	0.036304212	0.949191577	0.019051006	0.018743966	5.680095422	0.128051548	1.044934634	0.080972553	0.080219052	0.043954332	0.078009038	0.07614605	0.343429799	0.147149758	5.688238043	0.214844943	0.979155961	0.132858307	0.06368879	172	185	0.461815838	0.059463801	0.998312265	1.005354091	0.12945025	0.985959481	0.128760853	0.980708677	NO
58	2691	191	1182	A	EXTRA.MUTATION	NAR1_G536A_G624T	1	1513	1P12H01	NAR1	NAN	YES	x	A03	3	A	2	1	2	2	9	19029	15591	6090	5134	-0.146068854	54	5.05534343	5.659757938	0.123064211	5.33297645	0.184630363	0.939859445	0.020068351	0.019868186	0.666889845	0.048229907	0.048192563	0.938593598	0.018849862	0.018955428	5.660102415	0.123134291	1.001575965	0.073541723	0.074777744	0.001574724	0.073676845	0.073966152	0.26055356	0.149020864	5.668245036	0.131968704	0.941028995	0.134729412	0.059448925	172	185	0.423688872	0.055223936	0.994803399	0.922353254	0.120220239	0.915658984	0.130340776	0.992742185	NO
149	3263	191	1182	A	SINGLE.SITE	NAM7_G2463	1	2142	2P15E04	NAM7	NAN	YES	x	A04	4	A	2	1	2	2	9	19109	15707	6591	5375	-0.591747491	55	5.090273748	5.697645125	0.132975344	5.502771142	0.169754152	0.963012546	0.018038028	0.018441587	0.738567885	0.039392531	0.039372174	0.961606704	0.017792186	0.017682491	5.697905345	0.132901301	1.100515929	0.083955462	0.082774901	0.095779096	0.076005688	0.074939072	0.440516133	0.137789663	5.706047966	0.311931277	1.028030758	0.123498211	0.065237755	172	185	0.510690635	0.061012767	1.00143799	1.111752515	0.132822285	1.011642625	0.11947109	0.90995308	NO
CTRL	1617	191	1182	A	WT	WT	1	NAN	NAN	NAN	NAN	NAN	x	A05	5	A	2	1	2	2	9	18897	15472	6282	5066	-0.38559738	54	5.072507443	5.68208232	0.136648494	5.403007212	0.190179825	0.948220729	0.019696496	0.019723997	0.669077924	0.04912685	0.049087385	0.947113448	0.018551535	0.018640617	5.682067438	0.136310558	1.036146973	0.077663227	0.078457653	0.035508999	0.075070935	0.075100465	0.327178825	0.146276662	5.690210059	0.198593969	0.971428629	0.131985211	0.062250357	172	185	0.454088505	0.058025368	0.998658363	0.988532006	0.126318841	0.962109066	0.127784271	0.973270527	NO
185	3139	185	3139	A	NULL	NULL	1	NAN	NAN	NAN	NAN	NAN	x	A06	6	A	2	1	2	2	9	18953	15242	6305	6109	-0.444219707	54	5.073559338	5.649694998	0.167075866	2.971739591	0.201706276	0.525641366	0.031862564	0.033585963	0.566085833	-0.007158699	-0.007158577	0.525964611	0.031997387	0.033566218	5.649786635	0.167509889	0.519696298	0.004986868	0.005037232	-0.654510681	0.009606727	0.009678777	-2.966206479	0.252947703	5.657929256	-3.094791335	0.517293439	0.238656252	0.004179173	172	185	-4.67E-05	-4.58E-05	0.992992932	-0.000101631	-9.97E-05	-0.000759663	0.981383282	7.474718281	NO
177	2006	191	1182	A	CHR2SNP.69593(PolyG_T)	POLYMORPHISM	1	NAN	NAN	NAN	NAN	NAN	x	A07	7	A	2	1	2	2	9	19128	15126	5904	4779	-0.429249436	55	5.08252465	5.692363024	0.150194939	5.420810286	0.200351124	0.949411313	0.019603033	0.01912971	0.70039134	0.043746327	0.043718452	0.948404186	0.01836505	0.018147923	5.69241224	0.149797107	1.041588222	0.077483471	0.078063018	0.040746685	0.074471997	0.073911952	0.337272393	0.144079266	5.700554861	0.208687537	0.976213331	0.129787815	0.061834959	172	185	0.458873208	0.05760997	1.000473924	0.998948106	0.125414537	0.95522142	0.125546599	0.956227269	NO
109	3187	191	1182	A	SINGLE.SITE	DSE3_G249A	2	2182	2P19F12	DSE3	C	NO	x	A08	8	A	2	1	2	2	9	18658	15138	6667	5177	-0.589103631	54	5.078048332	5.662190991	0.165073264	5.371505632	0.221231298	0.947145511	0.01952933	0.019772787	0.719747761	0.040160735	0.040139164	0.94698361	0.018563113	0.018753452	5.662801861	0.165233291	1.035602656	0.07729626	0.080156499	0.034983534	0.074689202	0.076101654	0.326163484	0.14959581	5.670944482	0.197578628	0.97094999	0.135304358	0.063751059	172	185	0.453609866	0.05952607	0.995277165	0.987490029	0.129585808	0.986991959	0.13122746	0.99949562	NO
CTRL	1617	191	1182	A	WT	WT	1	NAN	NAN	NAN	NAN	NAN	x	A09	9	A	2	1	2	2	9	18686	14888	5755	4773	-0.40756159	54	5.074788106	5.686970351	0.144061491	5.413566295	0.201015257	0.949588212	0.020438888	0.01957262	0.677492119	0.047845527	0.047809068	0.948078101	0.018803681	0.018460326	5.686947164	0.144286462	1.040208387	0.078529486	0.078505761	0.039421065	0.075994221	0.074767965	0.334722412	0.145266383	5.695089785	0.206137555	0.974999988	0.130974932	0.062241621	172	185	0.457659865	0.058016632	0.999514778	0.996306709	0.126299823	0.961964214	0.126768014	0.965530199	NO
70	2802	191	1182	A	SINGLE.SITE	BSC5_G583A	1	333	Y333	BSC5	NAN	YES	x	A11	11	A	2	1	2	2	9	19681	15173	6690	4196	-0.864093866	55	5.08416017	5.694500341	0.159201459	5.433240832	0.217743316	0.95086703	0.020735994	0.020941519	0.668925042	0.049511278	0.04947088	0.950109368	0.01908349	0.01965709	5.69428964	0.159447531	1.048861342	0.081296252	0.084593285	0.047705136	0.077558779	0.079951358	0.350606935	0.154063912	5.702432261	0.222022079	0.982608868	0.139772461	0.067485875	172	185	0.465268745	0.063260887	1.000803417	1.012870929	0.137716349	1.04891833	0.135966336	1.035589334	NO
40	2154	191	1182	A	EMS.MUTANT	2P16H09	1	2154	2P16H09	NAN	NAN	NAN	x	A12	12	A	2	1	2	2	9	18994	15586	6119	5422	-0.04720718	54	5.071862086	5.676522601	0.12996011	5.280467961	0.204490228	0.927194186	0.023408937	0.022125189	0.609759363	0.055920648	0.055862467	0.925164641	0.021878493	0.020964588	5.676833789	0.130500081	0.951552885	0.077202423	0.074735677	-0.049660014	0.081201158	0.077625351	0.155539074	0.165428336	5.68497641	0.026954218	0.897041753	0.151136885	0.060040575	172	185	0.379701629	0.055815587	0.997739834	0.826594835	0.121508238	0.925469041	0.146998544	1.119616288	NO
57	2690	191	1182	A	SINGLE.SITE	NAR1_G536A	1	1513	1P12H01	NAR1	NAN	YES	x	B01	1	B	2	1	2	2	9	18078	14964	5912	5210	0.107152318	54	5.064298514	5.663170216	0.110784213	5.326851791	0.177862461	0.938716076	0.020913548	0.020288785	0.674288666	0.046692471	0.046658582	0.937742155	0.020303479	0.019627882	5.66291406	0.110191123	0.998245979	0.078650199	0.077523513	-0.001755561	0.079149032	0.07663071	0.253895279	0.155524859	5.676921596	0.129368413	0.939883115	0.147439723	0.064888361	172	185	0.422542992	0.060663372	0.996326176	0.91985872	0.132061668	1.005849375	0.143567338	1.093482459	NO
CTRL	1617	191	1182	A	WT	WT	1	NAN	NAN	NAN	NAN	NAN	x	B03	3	B	2	1	2	2	9	18373	14848	5773	5063	-0.178904564	55	5.075526723	5.684533886	0.124037722	5.417604535	0.175330082	0.950155781	0.018651831	0.018692355	0.737143666	0.037472222	0.037454698	0.948823727	0.01815647	0.01811091	5.684595856	0.123868099	1.043368704	0.077596864	0.077502992	0.042454617	0.074269538	0.073596076	0.340553203	0.142577102	5.698603392	0.216026337	0.979722625	0.134491966	0.064548135	172	185	0.462382502	0.060323146	1.000131432	1.006587696	0.131321009	1.000208141	0.130461568	0.993662196	NO
78	2917	191	1182	A	SINGLE.SITE	ADE6_G2801A	1	2021	2P02B11	ADE6	NAN	YES	x	B04	4	B	2	1	2	2	9	19741	13998	3917	3528	-0.65725557	55	5.142587844	5.713039212	0.12620591	5.565493018	0.156720682	0.970769977	0.014131836	0.014347958	0.747913195	0.039008446	0.038988678	0.969606136	0.013899758	0.013537422	5.712996078	0.125821145	1.139295472	0.069612947	0.068863104	0.130410064	0.060990167	0.059679136	0.503071715	0.107680487	5.727003614	0.378544849	1.064417764	0.099595351	0.05623508	172	185	0.54707764	0.052010091	1.005115804	1.190965529	0.113223831	0.86237075	0.09506894	0.724093795	NO
16	1523	191	1182	A	EMS.MUTANT	1P16A09	1	1523	1P16A09	NAN	NAN	NAN	x	B05	5	B	2	1	2	2	9	18240	15162	5011	4751	0.677962918	53	5.058868676	5.63736763	0.070083103	5.384199242	0.151472136	0.955364762	0.024528386	0.022150166	0.709472645	0.043618251	0.043590621	0.955862816	0.023956167	0.021986327	5.637679863	0.070114106	1.074129668	0.107710287	0.098964066	0.071510722	0.100497379	0.091335639	0.395598903	0.172306951	5.651687399	0.271072037	1.006881928	0.164221815	0.083276842	172	185	0.489541804	0.079051854	0.991897457	1.06571238	0.172092635	1.31074575	0.161481314	1.229924485	NO
122	3209	191	1182	A	SINGLE.SITE	ADE5_G479A	1	2146	2P15G08	ADE5	NAN	YES	x	B06	6	B	2	1	2	2	9	13799	10028	3053	2927	-0.280395563	57	5.134815056	5.717926678	0.067686936	5.60084335	0.099291093	0.979704637	0.010573716	0.010912009	0.779347199	0.035040225	0.035025895	0.979777722	0.010225548	0.010688842	5.717991092	0.067540462	1.192241325	0.055560102	0.057688605	0.175835002	0.04656574	0.048375847	0.582613548	0.083309759	5.731998627	0.458086682	1.111164427	0.075224623	0.045990999	172	185	0.593824303	0.041766011	1.005992452	1.292731093	0.090922888	0.692515339	0.070333953	0.535699453	NO
CTRL	1617	191	1182	A	WT	WT	1	NAN	NAN	NAN	NAN	NAN	x	B07	7	B	2	1	2	2	9	18420	14888	5885	5003	-0.235029216	55	5.076476834	5.686923916	0.137988672	5.411318289	0.191847026	0.949214591	0.019008362	0.018799166	0.720095403	0.040288773	0.040266996	0.947934409	0.018333598	0.018058768	5.686790955	0.137880803	1.039601464	0.076854274	0.076937393	0.038837432	0.07411187	0.07322968	0.333598737	0.142524349	5.70079849	0.20907187	0.976396475	0.134439213	0.064075651	172	185	0.459056351	0.059850663	1.000516682	0.999346803	0.130292432	0.992373973	0.130377595	0.993022613	NO
19	1575	191	1182	A	EMS.MUTANT	1P04G01	1	1575	1P04G01	NAN	NAN	NAN	x	B09	9	B	2	1	2	2	9	17559	13534	5983	3922	-0.873150239	56	5.121940327	5.713492222	0.159608589	5.530244531	0.193455429	0.964975724	0.020132662	0.02039991	0.731128281	0.040928986	0.040906154	0.963618292	0.019204646	0.019461311	5.713683748	0.159334107	1.110040564	0.091762617	0.092255143	0.104396558	0.08284915	0.082839715	0.456246759	0.151173903	5.727691283	0.331719892	1.03858818	0.143088767	0.077097087	172	185	0.521248057	0.072872098	1.005236493	1.134735589	0.158639562	1.208280249	0.139803108	1.064812156	NO
191	1182	191	1182	A	GFP.MATALPHA	GFP.MATALPHA	1	NAN	NAN	NAN	NAN	NAN	x	B10	10	B	2	1	2	2	9	20253	15630	6762	4038	-0.879818875	55	5.088296737	5.689190716	0.164679557	5.172670054	0.226529154	0.908162826	0.021217369	0.022260807	0.625754677	0.049639424	0.049598712	0.907117893	0.020075855	0.020937242	5.689348728	0.163884905	0.892090921	0.061500997	0.063342609	-0.114187223	0.06914102	0.070861538	0.01441345	0.161461118	5.703356264	-0.110113417	0.846157271	0.153375982	0.053125621	172	185	0.328817148	0.048900632	1.000965584	0.715821411	0.106454666	0.81081332	0.148716795	1.132703363	NO
CTRL	1617	191	1182	A	WT	WT	1	NAN	NAN	NAN	NAN	NAN	x	B11	11	B	2	1	2	2	9	19479	15363	6066	4418	-0.697432129	54	5.080354477	5.687852105	0.147216035	5.415182928	0.213817491	0.950551712	0.020501306	0.021165348	0.644880997	0.053740974	0.053689328	0.948996028	0.019231337	0.01973828	5.688113856	0.147177843	1.044101627	0.081379476	0.083404398	0.043156828	0.07835652	0.079584315	0.341900604	0.153226929	5.702121391	0.217373738	0.980369734	0.145141794	0.06975334	172	185	0.46302961	0.065528352	1.000748858	1.007996424	0.142652528	1.086514797	0.141520867	1.077895488	NO
170	629	170	629	A	WT	WT	1	NAN	NAN	NAN	NAN	NAN	a	B12	12	B	2	1	2	2	9	20133	16814	6193	5507	0.205872321	52	5.039413271	5.619121517	0.078490662	5.193213675	0.187820488	0.922978218	0.02442564	0.025122293	0.268543144	0.116465727	0.115943381	0.922249567	0.022890589	0.02319486	5.619318591	0.079329986	0.941370867	0.079239534	0.079022372	-0.060418097	0.084104788	0.083615491	0.13274319	0.17895017	5.633326127	0.008216323	0.889667252	0.170865034	0.066617727	170	171	0.373527926	0.062521821	0.998236435	0.994708803	0.166496268	1.061333692	0.167381919	1.06697929	NO
186	1177	190	1180	A	DELETION	CIS	1	NAN	NAN	NAN	NAN	NAN	a	C01	1	C	2	1	2	2	9	19152	15093	6717	4768	-0.736172721	55	5.089122916	5.691613164	0.147494408	5.503571438	0.19063648	0.964040422	0.018665872	0.019168434	0.708492269	0.044899073	0.044868938	0.962637807	0.0174235	0.018041442	5.691486637	0.147342395	1.105379361	0.083239261	0.08545625	0.100188589	0.074880036	0.076823253	0.448579358	0.141110711	5.703573891	0.318693208	1.031614843	0.130454283	0.06937985	172	185	0.514274719	0.065154861	1.001003778	1.119554919	0.141839454	1.080322007	0.126692716	0.964956688	NO
144	3254	191	1182	A	SINGLE.SITE	IRA2_G7496A	2	2157	2P17B12	IRA2	NAN	YES	x	C02	2	C	2	1	2	2	9	18607	15233	7152	6106	-0.392796358	52	5.039041945	5.593101006	0.183395196	5.252741408	0.261997361	0.938320042	0.018404846	0.018824523	0.575318921	0.064901585	0.064810688	0.937175643	0.014928644	0.015612854	5.592938887	0.184016584	0.996042605	0.057805591	0.061136367	-0.003965247	0.058214187	0.060801334	0.249465151	0.123194119	5.605026141	0.119579001	0.935595805	0.112537691	0.04904546	172	185	0.418255682	0.044820471	0.983708189	0.910525422	0.097572324	0.743160846	0.10716046	0.816189014	NO
171	880	171	880	A	NULL	NULL	1	NAN	NAN	NAN	NAN	NAN	a	C03	3	C	2	1	2	2	9	18356	15496	4801	4602	0.225105031	53	5.041441968	5.621084842	0.067840571	2.897901787	0.193787226	0.515101957	0.033534454	0.036049985	0.271359891	0.043362104	0.043334957	0.514607945	0.0337519	0.035972475	5.621037057	0.06785369	0.518003999	0.004813547	0.004991765	-0.657772317	0.00928288	0.009614516	-3.055015645	0.27394431	5.633124312	-3.184901795	0.515784497	0.263287882	0.004213218	170	171	-0.000354829	0.000117311	0.998200673	-0.000944914	0.000312401	0.001991409	-0.330613831	-2.107504287	NO
CTRL	1617	191	1182	A	WT	WT	1	NAN	NAN	NAN	NAN	NAN	x	C04	4	C	2	1	2	2	9	18791	15127	6383	5140	-0.450724017	55	5.072354772	5.688107338	0.147027793	5.422871235	0.204997728	0.950489908	0.020167687	0.019827306	0.675424202	0.048358037	0.048320395	0.949299033	0.018636713	0.018654499	5.688608897	0.146910177	1.045392918	0.079950211	0.079884374	0.044392813	0.076245529	0.075799221	0.344270099	0.146412758	5.700696151	0.214383949	0.978935024	0.13575633	0.065048032	172	185	0.4615949	0.060823044	1.000498721	1.00487312	0.132409266	1.008496863	0.131767149	1.00360617	NO
170	629	190	1180	A	WT	WT	1	NAN	NAN	NAN	NAN	NAN	a	C05	5	C	2	1	2	2	9	18740	15346	4990	4520	-0.026127537	53	5.042441375	5.624912963	0.074450409	5.198523742	0.164569096	0.923403018	0.02271506	0.022803813	0.252983907	0.119187464	0.118627848	0.923840096	0.021432626	0.021188496	5.625041484	0.075402974	0.946897622	0.074894566	0.073328822	-0.054564299	0.079326079	0.077195728	0.145181135	0.164004225	5.637128738	0.015294985	0.892436907	0.153347797	0.060212738	170	171	0.376297581	0.056116832	0.998910265	1.002084425	0.149439715	0.952606365	0.149128867	0.950624859	NO
47	2479	191	1182	A	SINGLE.SITE	ECM23_G130A	1	123	Y123	ECM23	NAN	YES	x	C06	6	C	2	1	2	2	9	18749	14905	5835	4512	-0.57478203	55	5.081015672	5.680367229	0.131045876	5.411460603	0.182961709	0.949527323	0.01915299	0.019332712	0.694484102	0.044899073	0.044868938	0.948927366	0.018260638	0.018409393	5.680437508	0.131638839	1.043809437	0.077504066	0.078482594	0.042876941	0.074021538	0.074640036	0.341363661	0.144262244	5.692524762	0.211477511	0.977544418	0.133605816	0.063831815	172	185	0.460204294	0.059606826	0.999064605	1.001845827	0.12976161	0.988330956	0.129522534	0.986510029	NO
154	3272	191	1182	A	OFF.TARGET	TUP1_T2098del	2	94	Y94	TUP1	NAN	YES	x	C07	7	C	2	1	2	2	9	17316	14144	5562	5030	0.127624549	55	5.081005958	5.692712998	0.124646523	5.450783161	0.170848515	0.954564723	0.017855759	0.017714035	0.803165495	0.026595268	0.026589	0.953516347	0.017610143	0.017418376	5.692853788	0.124629692	1.063686844	0.077344435	0.077183884	0.061741027	0.072753856	0.071988139	0.377249513	0.136873993	5.704941043	0.247363363	0.995000666	0.126217566	0.062505272	172	185	0.477660542	0.058280284	1.00124372	1.039847362	0.126873782	0.966335779	0.122011929	0.92930541	NO
CTRL	1617	191	1182	A	WT	WT	1	NAN	NAN	NAN	NAN	NAN	x	C08	8	C	2	1	2	2	9	18820	15331	6526	4864	-0.559545738	54	5.067356268	5.674181615	0.135616149	5.407066108	0.198577442	0.949988353	0.02054995	0.020656307	0.653780815	0.052202689	0.052155347	0.948264416	0.019154569	0.019400838	5.674138926	0.135828057	1.04099635	0.080779358	0.081929162	0.040178283	0.077974689	0.078233784	0.33617939	0.151380296	5.68622618	0.20629324	0.975073978	0.140723868	0.066884901	172	185	0.457733855	0.062659913	0.997959174	0.996467782	0.136408053	1.038953679	0.136891584	1.042636499	NO
44	2200	191	1182	A	EMS.MUTANT	2P01A08	1	2200	2P01A08	NAN	NAN	NAN	x	C10	10	C	2	1	2	2	9	17185	14113	4812	4044	-0.301824789	53	5.046226943	5.646624248	0.096413631	5.250296765	0.130061405	0.927798968	0.015503445	0.01625528	0.826011641	0.018026226	0.018024274	0.927587252	0.01545205	0.016152645	5.646512843	0.096299639	0.960193189	0.056149993	0.056976285	-0.040620776	0.058253343	0.059619663	0.174483901	0.123750917	5.658600097	0.044597751	0.904113013	0.113094489	0.04572759	172	185	0.386772889	0.041502601	0.993110668	0.841988678	0.090349457	0.688147789	0.107304836	0.817288648	NO
87	2997	191	1182	A	SINGLE.SITE	ADE6_G1361A	2	2038	2P04A04	ADE6	NAN	YES	x	C11	11	C	2	1	2	2	9	13849	9998	3214	3032	-0.366815111	58	5.170330496	5.74617982	0.074356735	5.714091583	0.110418294	0.994471793	0.008865566	0.009180359	0.636285962	0.062334602	0.062254054	0.994296501	0.007753843	0.008131948	5.746451062	0.074544976	1.275497925	0.046978863	0.049118536	0.243336632	0.036776369	0.038562711	0.696150453	0.063320277	5.758538316	0.566264303	1.181012184	0.05266385	0.035876195	172	185	0.663672061	0.031651206	1.010650291	1.444786789	0.068903375	0.524803433	0.047691033	0.363239363	NO
CTRL	1617	191	1182	A	WT	WT	1	NAN	NAN	NAN	NAN	NAN	x	C12	12	C	2	1	2	2	9	19686	15515	6356	4568	-0.722706098	55	5.082826239	5.701316228	0.156428932	5.438163235	0.208967551	0.951521698	0.019808937	0.019786461	0.696998426	0.044642897	0.044613275	0.949873379	0.018576393	0.018711385	5.701070792	0.156363969	1.047848979	0.07895182	0.081098082	0.046739471	0.075975022	0.076438336	0.348761486	0.147971163	5.713158046	0.218875336	0.981091925	0.137314735	0.066090921	172	185	0.463751801	0.061865933	1.002685842	1.009568604	0.134679592	1.025788827	0.13340311	1.016066488	NO
CTRL	1617	191	1182	A	WT	WT	1	NAN	NAN	NAN	NAN	NAN	x	D02	2	D	2	1	2	2	9	19096	15050	6084	4694	-0.611220319	55	5.083343567	5.69853027	0.151132543	5.435904061	0.196453328	0.951601562	0.019445557	0.019390236	0.727851613	0.039264501	0.039244342	0.950280026	0.018702229	0.018596134	5.698252176	0.151083795	1.049594596	0.080535649	0.080204492	0.04840399	0.076828153	0.075812839	0.351941469	0.1458761	5.71468847	0.223545755	0.983345101	0.138150914	0.06680466	172	185	0.466004977	0.062579672	1.002954438	1.014473675	0.136233372	1.037623215	0.134289706	1.022819261	NO
185	3139	191	1182	A	NULL	NULL	1	NAN	NAN	NAN	NAN	NAN	x	D03	3	D	2	1	2	2	9	18708	15540	6191	5960	0.1727279	54	5.063280094	5.667951404	0.135066429	2.967547976	0.204960856	0.522112353	0.0305833	0.033527953	0.345266252	0.031201062	0.031190943	0.520736081	0.030099738	0.033284499	5.667645911	0.135083115	0.518898488	0.004488071	0.004889569	-0.656047007	0.008646507	0.009400285	-3.007093604	0.255779908	5.684082204	-3.135489319	0.516595073	0.248054721	0.004170519	172	185	-0.000745051	-5.45E-05	0.997582896	-0.001621945	-0.000118578	-0.000903151	0.073108567	0.556832336	NO
21	1581	191	1182	A	EMS.MUTANT	1P06E01	1	1581	1P06E01	NAN	NAN	NAN	x	D05	5	D	2	1	2	2	9	14958	10826	3295	3204	-0.09588839	58	5.159707653	5.746233182	0.067716579	5.665582865	0.108219589	0.985947614	0.01183698	0.011829319	0.613745611	0.064773216	0.064682857	0.986118246	0.010833174	0.011103511	5.746410878	0.067850578	1.227440911	0.061419992	0.062771167	0.204931441	0.05029082	0.051229302	0.63219647	0.086264569	5.762847171	0.503800756	1.139761873	0.078539382	0.05026361	172	185	0.62242175	0.046038622	1.011406515	1.354986558	0.100224187	0.763358795	0.073966923	0.563370013	NO
CTRL	1617	191	1182	A	WT	WT	1	NAN	NAN	NAN	NAN	NAN	x	D06	6	D	2	1	2	2	9	18223	14714	5802	5157	0.077503773	55	5.066631639	5.681910259	0.12417797	5.411623073	0.177072077	0.949595235	0.01851628	0.018143476	0.71995053	0.040416813	0.040394827	0.948121073	0.017598568	0.017464992	5.681947887	0.123923118	1.040390022	0.074304911	0.074460783	0.039595664	0.071531855	0.07086723	0.335058451	0.137735298	5.69838418	0.206662737	0.975249629	0.130010112	0.061815577	172	185	0.457909506	0.057590588	1.00009296	0.996850167	0.125372343	0.95490005	0.125768493	0.957917329	NO
15	1513	191	1182	A	EMS.MUTANT	1P12H01	1	1513	1P12H01	NAN	NAN	NAN	x	D07	7	D	2	1	2	2	9	18011	14300	5770	4864	-0.21551133	54	5.064281129	5.671872798	0.125138855	5.334395439	0.187413189	0.937412785	0.019638499	0.019303182	0.677665202	0.045795735	0.04576376	0.9363215	0.018299926	0.018451091	5.671722714	0.125239978	0.992738928	0.070143933	0.07229966	-0.007287562	0.070866484	0.07177419	0.24278575	0.14666532	5.688159008	0.114390035	0.93334024	0.138940133	0.060238615	172	185	0.416000117	0.056013627	0.998298394	0.905615151	0.121939363	0.928752712	0.134648104	1.025549	NO
182	2702	191	1182	A	RAP1.PAM.MUT	RAP1.CONTROL	2	NAN	NAN	NAN	NAN	NAN	x	D08	8	D	2	1	2	2	9	18672	15262	6291	5276	-0.22182958	54	5.073173179	5.676585707	0.125896301	5.405992283	0.182149626	0.949437465	0.018880643	0.018930648	0.706923725	0.042721761	0.042695799	0.94808734	0.018129741	0.018132547	5.676712639	0.126142837	1.040247432	0.076175851	0.077200289	0.0394586	0.07335941	0.073480368	0.334794657	0.142840428	5.693148932	0.206398943	0.97512422	0.135115241	0.064225955	182	185	0.457784097	0.060000967	0.999218027	1.001054197	0.131206435	1.018364758	0.131068264	1.017292332	NO
79	2918	191	1182	A	SINGLE.SITE	ADE6_G2801A	2	2021	2P02B11	ADE6	NAN	YES	x	D09	9	D	2	1	2	2	9	18271	13223	4055	3771	-0.369709382	55	5.140934592	5.710518458	0.118486448	5.550615987	0.154074709	0.96944476	0.013989531	0.014354375	0.719630553	0.043746327	0.043718452	0.96856214	0.013499331	0.013440328	5.710620645	0.118555115	1.134095704	0.066839801	0.067391842	0.125835597	0.059292518	0.058878719	0.494907659	0.106243741	5.727056938	0.366511944	1.057664271	0.098518554	0.054961738	172	185	0.540324147	0.050736749	1.005125162	1.176263454	0.110451817	0.841257672	0.093900577	0.715194941	NO
CTRL	1617	191	1182	A	WT	WT	1	NAN	NAN	NAN	NAN	NAN	x	D10	10	D	2	1	2	2	9	19471	15241	5896	4676	-0.462410558	54	5.076901854	5.689278662	0.131654109	5.411073119	0.174173405	0.947853158	0.017766227	0.018148008	0.717910646	0.040416813	0.040394827	0.946706081	0.017592175	0.017383083	5.689217613	0.131790903	1.034441037	0.073815808	0.072667169	0.03386122	0.071242611	0.069872517	0.323993205	0.135913148	5.705653906	0.19559749	0.970017466	0.128187961	0.060278503	172	185	0.452677342	0.056053515	1.00136883	0.985459962	0.122026197	0.929414088	0.123826641	0.943127193	NO
4	99	190	1180	A	EMS.MUTANT	Y99	1	99	Y99	NAN	NAN	NAN	a	D11	11	D	2	1	2	2	9	14516	11720	4436	3870	-0.092695513	55	5.112292366	5.711366386	0.122891797	5.411079026	0.148291027	0.944509701	0.015536347	0.015618996	0.859082349	0.014957428	0.014956313	0.944216096	0.015711887	0.015518654	5.711466384	0.122927098	1.024131033	0.064020795	0.063970969	0.023844479	0.062807744	0.062026151	0.304521525	0.122000779	5.727902678	0.17612581	0.960949763	0.114275593	0.052700199	170	171	0.444810436	0.048604293	1.014995585	1.18453488	0.129433745	0.825077919	0.109269678	0.696541683	NO
CTRL	1617	191	1182	A	WT	WT	1	NAN	NAN	NAN	NAN	NAN	x	E01	1	E	2	1	2	2	10	19478	15603	5975	4927	-0.389574913	54	5.080057274	5.699273036	0.147582093	5.441379313	0.195894943	0.952073945	0.019474857	0.019588271	0.712970085	0.041953396	0.041928808	0.950389813	0.018440539	0.01874976	5.699423002	0.147890738	1.050066831	0.079543029	0.08118957	0.04885381	0.075304382	0.076564547	0.352800002	0.147541039	5.714501722	0.224071515	0.983599405	0.138854829	0.067180359	172	185	0.466259282	0.06295537	1.002921663	1.015027287	0.137051253	1.043852616	0.135022235	1.028398575	NO
155	3273	191	1182	A	OFF.TARGET	SET1_TTATCGAGTACGTTGGTGA2890del	1	54	Y54	SET1	NAN	YES	x	E03	3	E	2	1	2	2	10	16714	13574	5298	4591	-0.001939814	54	5.096057898	5.682377962	0.107295361	5.44414008	0.153967823	0.955137667	0.016195457	0.01672125	0.701459854	0.044642897	0.044613275	0.953896369	0.016021835	0.015957111	5.682553148	0.107294542	1.065365132	0.071074826	0.071262588	0.063317587	0.066463661	0.066234186	0.380221283	0.125998471	5.697631868	0.251492796	0.997049865	0.11731226	0.058335597	172	185	0.479709742	0.054110608	0.999960925	1.044308385	0.11779657	0.897199076	0.112798644	0.859132311	NO
126	3222	191	1182	A	SINGLE.SITE	ADE5_G713A	2	1611	1P15H09	ADE5	NAN	YES	x	E04	4	E	2	1	2	2	10	13173	9655	2819	2717	-0.408307018	57	5.132456197	5.720420629	0.065320589	5.607229775	0.089568753	0.979898693	0.009545376	0.009860831	0.859955911	0.020967476	0.020964404	0.979699271	0.009388841	0.009781844	5.720351781	0.065046303	1.191816643	0.050609818	0.053235208	0.175478734	0.042541884	0.044442656	0.582000065	0.076925659	5.735430501	0.453271578	1.108227634	0.068239449	0.041519983	172	185	0.59088751	0.037294994	1.006594762	1.286337816	0.081189669	0.618382153	0.063116911	0.480730758	NO
CTRL	1617	191	1182	A	WT	WT	1	NAN	NAN	NAN	NAN	NAN	x	E05	5	E	2	1	2	2	10	17953	14806	5570	4957	-0.028298919	54	5.07145028	5.672093238	0.114406549	5.395029189	0.167010833	0.948901536	0.018664107	0.018361099	0.718927342	0.040544854	0.040522659	0.947855325	0.017804355	0.017762025	5.672270118	0.114631081	1.039267723	0.074319644	0.075180159	0.038516353	0.072129466	0.071805372	0.332980299	0.139355279	5.687348838	0.204251812	0.974104694	0.130669068	0.061979282	172	185	0.45676457	0.057754293	0.998156206	0.99435769	0.125728722	0.957614414	0.126442148	0.963048231	NO
168	R54	191	1182	A	RAP1.MUTANT	PLATE	1	NAN	NAN	RAP1	NAN	NAN	x	E06	6	E	2	1	2	2	10	7344	6218	3279	2256	-0.656371479	51	4.912195337	5.529343058	0.189188562	5.113777955	0.179007231	0.924731519	0.014787396	0.014936679	0.955832169	-0.005624656	-0.005624596	0.92483921	0.014617224	0.014903631	5.529406014	0.189219865	0.950404652	0.051683222	0.052938221	-0.050867437	0.054102369	0.055255025	0.152994211	0.117477986	5.544484735	0.024265724	0.895975157	0.108791776	0.043102538	182	185	0.378635034	0.03887755	0.973125622	0.827975878	0.085015042	0.659848144	0.102678163	0.796941266	NO
151	3267	191	1182	A	SINGLE.SITE	NAP1_G1034A	1	1523	1P16A09	NAP1	NAN	YES	x	E07	7	E	2	1	2	2	10	18727	15687	7136	5295	-0.478268223	54	5.06459685	5.667355809	0.114691273	5.386329495	0.18250909	0.947895492	0.020347113	0.020560601	0.662939835	0.050280178	0.050237871	0.946842477	0.019374587	0.019626416	5.66675279	0.114139971	1.035011619	0.080934821	0.081714129	0.034412653	0.078135942	0.078598298	0.325059824	0.152671214	5.68183151	0.196331337	0.970362673	0.143985004	0.067756535	172	185	0.453022549	0.063531546	0.997187889	0.986211464	0.138305564	1.053406094	0.140239258	1.068134099	NO
172	1617	172	1617	A	WT	WT	1	NAN	NAN	NAN	NAN	NAN	x	E08	8	E	2	1	2	2	10	18247	14816	5681	4827	-0.246894963	54	5.073135939	5.673622601	0.111390611	5.395333384	0.169479888	0.948493823	0.018597393	0.018779725	0.695933586	0.044514811	0.044485443	0.947295491	0.018049641	0.018068169	5.673992857	0.111572096	1.03691107	0.075571657	0.076312486	0.036246168	0.073265841	0.072940413	0.328602396	0.142074809	5.689071577	0.199873908	0.972032694	0.133388599	0.062992835	172	185	0.454692571	0.058767847	0.998458554	0.989847032	0.127935186	0.974419978	0.129247431	0.984414709	NO
CTRL	1617	191	1182	A	WT	WT	1	NAN	NAN	NAN	NAN	NAN	x	E09	9	E	2	1	2	2	10	18158	14357	5808	4485	-0.520707535	55	5.078706011	5.684949436	0.139227545	5.412043694	0.188161431	0.949414755	0.019091483	0.018963859	0.705815654	0.042849827	0.04282363	0.948307705	0.017749955	0.018059213	5.684765418	0.138995164	1.041179595	0.074648611	0.076874021	0.040354297	0.072039245	0.07317744	0.336517914	0.141991849	5.699844138	0.207789427	0.975785636	0.133305639	0.063453946	172	185	0.458445512	0.059228957	1.000349189	0.998017031	0.128939005	0.982065573	0.129195195	0.984016847	NO
82	2921	191	1182	A	SINGLE.SITE	ADE6_G3443A	2	1577	1P05D03	ADE6	NAN	YES	x	E10	10	E	2	1	2	2	10	14635	10610	3821	3722	0.790507527	57	5.169323414	5.755105015	0.067265006	5.732312924	0.105254227	0.996131704	0.010324837	0.010022002	0.647727993	0.060538202	0.060464409	0.996201025	0.009490779	0.009317334	5.755473411	0.067407473	1.28713742	0.057977191	0.057189737	0.252420698	0.045372724	0.044449762	0.711043839	0.072635239	5.770552131	0.582315352	1.192034867	0.063949029	0.044268887	172	185	0.674694743	0.040043899	1.012758771	1.468782716	0.087173921	0.663961284	0.059351135	0.452048678	NO
59	2692	191	1182	A	SINGLE.SITE	NUP192_G3133A	1	99	Y99	NUP192	NAN	YES	x	E11	11	E	2	1	2	2	10	18054	14047	5230	4310	-0.416817939	54	5.063873534	5.668407816	0.128370785	5.40615681	0.191975872	0.950736192	0.020258457	0.020293546	0.66064237	0.051177303	0.051132693	0.949161857	0.01907637	0.019250509	5.668387658	0.12845087	1.044807949	0.081225958	0.083370531	0.043833087	0.07796777	0.078555278	0.343197387	0.152966217	5.683466378	0.2144689	0.97897573	0.144280006	0.069138049	172	185	0.461635607	0.064913061	0.997474816	1.004961736	0.141313064	1.076312758	0.140615368	1.070998745	NO
45	2204	191	1182	A	EMS.MUTANT	2P03B06	1	2204	2P03B06	NAN	NAN	NAN	x	E12	12	E	2	1	2	2	10	19060	16202	6478	5851	1.095622286	52	5.010606454	5.591341799	0.080997232	5.216733151	0.131060159	0.932266989	0.015008367	0.015912944	0.653282962	0.04989572	0.049854376	0.932126755	0.014378394	0.015462294	5.591091189	0.081035624	0.976830851	0.053251603	0.05828114	-0.023441773	0.054726676	0.059066803	0.209982834	0.122170216	5.60616991	0.081254346	0.919209406	0.113484006	0.047598282	172	185	0.401869282	0.043373294	0.983908926	0.874852904	0.094421877	0.719165434	0.107928861	0.822041546	NO
187	1156	190	1180	A	m76	CIS	1	NAN	NAN	NAN	NAN	NAN	a	F01	1	F	2	1	2	2	10	18867	15054	5851	5215	-0.167257272	55	5.086074931	5.70208141	0.138144028	5.490434677	0.175820759	0.960409604	0.0180542	0.018025943	0.775931823	0.032352709	0.032341428	0.959397026	0.017908409	0.017562111	5.701999938	0.137672472	1.090224604	0.082857035	0.081365926	0.086383734	0.075953733	0.074086305	0.423236437	0.137805011	5.718162876	0.292088094	1.01765194	0.129436037	0.06703101	172	185	0.500311817	0.062806022	1.003564213	1.089158255	0.136726127	1.041376289	0.125533756	0.956129456	NO
CTRL	1617	191	1182	A	WT	WT	1	NAN	NAN	NAN	NAN	NAN	x	F03	3	F	2	1	2	2	10	18167	14849	5939	5157	-0.087445458	55	5.07553142	5.687060527	0.129105326	5.42015386	0.178941673	0.949718321	0.018730494	0.01852456	0.746802961	0.035680183	0.035665053	0.948747384	0.01821536	0.017992168	5.687245628	0.129170277	1.043044282	0.076946521	0.077431847	0.042143631	0.074060894	0.073321642	0.339956207	0.142531287	5.703408566	0.208807864	0.976270662	0.134162313	0.063926798	172	185	0.458930538	0.059701809	1.000974763	0.999072913	0.129968384	0.989905853	0.130088988	0.990824433	NO
188	1200	190	1180	A	m75	CIS	1	NAN	NAN	NAN	NAN	NAN	a	F05	5	F	2	1	2	2	10	17760	14508	5668	5147	0.170924513	55	5.079026573	5.688966795	0.118164948	5.430739218	0.170098632	0.951963967	0.017612479	0.017874373	0.774462164	0.031201062	0.031190943	0.951070399	0.017115247	0.017495633	5.689177527	0.118497251	1.053003356	0.074018359	0.076160528	0.05164642	0.070379816	0.071686388	0.358122189	0.137667411	5.705340465	0.226973846	0.985005643	0.129298437	0.062738636	172	185	0.467665519	0.058513648	1.00131382	1.018088608	0.127381805	0.970205143	0.125118584	0.952967291	NO
73	2907	191	1182	A	SINGLE.SITE	ADE4_C734T	2	1509	1P12D09	ADE4	NAN	YES	x	F06	6	F	2	1	2	2	10	21854	17062	5603	5137	-0.195291995	52	5.013223515	5.600917381	0.070588714	5.365386887	0.122639882	0.956783526	0.014910373	0.014987848	0.606215035	0.062591263	0.062509717	0.956319753	0.014260733	0.014391499	5.601063187	0.070745739	1.076185627	0.06354174	0.06486699	0.073422963	0.059480921	0.060046746	0.399172156	0.112537477	5.617226125	0.268023813	1.005338527	0.104168503	0.052663048	172	185	0.487998404	0.04843806	0.985849343	1.062352461	0.105447665	0.803143485	0.099258644	0.75600473	NO
CTRL	1617	191	1182	A	WT	WT	1	NAN	NAN	NAN	NAN	NAN	x	F07	7	F	2	1	2	2	10	18089	14427	5933	4838	-0.411396844	55	5.079650399	5.699486502	0.150879222	5.440406829	0.196501586	0.952395632	0.018960949	0.019099725	0.698684068	0.044514811	0.044485443	0.951174109	0.017807595	0.018099927	5.699443237	0.150845716	1.053452206	0.076688754	0.078961267	0.052072586	0.072970057	0.074211202	0.358933199	0.142614305	5.715606174	0.227784856	0.985399324	0.13424533	0.065191835	172	185	0.4680592	0.060966846	1.0031155	1.018945635	0.132722318	1.010881225	0.130254562	0.992085535	NO
175	2004	191	1182	A	CHR2SNP.69593(T_G)	POLYMORPHISM	2	NAN	NAN	NAN	NAN	NAN	x	F08	8	F	2	1	2	2	10	18096	14534	5580	4895	-0.13640395	54	5.072810479	5.686355585	0.131625081	5.422986859	0.1750123	0.950631328	0.018027035	0.017825812	0.760113156	0.033504442	0.033491914	0.949667985	0.01759825	0.017333655	5.686212467	0.131168698	1.046969393	0.074708312	0.074704082	0.045899698	0.071735302	0.070706373	0.347155308	0.136523806	5.702375405	0.216006965	0.979713328	0.128154832	0.061505496	172	185	0.462373205	0.057280508	1.000793438	1.006567457	0.124697311	0.949758657	0.12388371	0.943561855	NO
30	2037	191	1182	A	EMS.MUTANT	2P03H11	1	2037	2P03H11	NAN	NAN	NAN	x	F09	9	F	2	1	2	2	10	19049	14875	5853	4203	-0.734560631	54	5.061060225	5.68581695	0.155544818	5.38688226	0.190675758	0.944921672	0.019408441	0.020103882	0.746417083	0.034912237	0.034898063	0.943424759	0.019046096	0.019470405	5.685605608	0.155290557	1.020896243	0.078104422	0.079555602	0.020680911	0.076084974	0.07727347	0.29833326	0.152664467	5.701768545	0.167184917	0.95684489	0.144295493	0.06595209	172	185	0.439504767	0.061727102	1.000686932	0.956783807	0.134377362	1.023486894	0.140446944	1.069715944	NO
138	3245	191	1182	A	SINGLE.SITE	HXK2_G1388A	2	2053	2P05G06	HXK2	NAN	YES	x	F10	10	F	2	1	2	2	10	22629	19262	7680	6744	0.186592256	52	5.020367831	5.600495344	0.086256065	5.190778367	0.144850095	0.92620636	0.016867591	0.017213425	0.604404367	0.057459559	0.057396448	0.925796445	0.016462457	0.016418905	5.600366255	0.086544053	0.953790476	0.058230289	0.059078856	-0.047311259	0.06127876	0.061239411	0.160479783	0.130127259	5.616529192	0.02933144	0.89798725	0.121758285	0.048484767	172	185	0.380647127	0.044259779	0.985727028	0.828653145	0.096351719	0.733864095	0.11627509	0.885610704	NO
CTRL	1617	191	1182	A	WT	WT	1	NAN	NAN	NAN	NAN	NAN	x	F11	11	F	2	1	2	2	10	18558	14660	5607	4483	-0.533281099	54	5.086000616	5.687012316	0.138101689	5.412987765	0.191197662	0.949403235	0.019338949	0.019306673	0.703530758	0.043234033	0.043207126	0.947838135	0.018394937	0.018411362	5.687393893	0.138106008	1.039195206	0.077477283	0.078308175	0.038446573	0.07459015	0.074545994	0.332845871	0.145172938	5.703556831	0.201697528	0.972894686	0.136803964	0.064723667	172	185	0.455554562	0.060498678	1.001000784	0.991723552	0.131703135	1.003118611	0.132802267	1.011490157	NO
35	2072	191	1182	A	EMS.MUTANT	2P07G03	1	2072	2P07G03	NAN	NAN	NAN	x	F12	12	F	2	1	2	2	10	22629	17190	7370	7093	0.107385377	54	5.109125107	5.670992235	0.104612803	5.490657847	0.171289528	0.966821561	0.015575821	0.015259714	0.441928866	0.09255747	0.092294511	0.966474568	0.012007209	0.012141578	5.671321889	0.105567207	1.123824715	0.058260604	0.059742801	0.116737791	0.052048675	0.05277639	0.47858284	0.095735141	5.687484827	0.347434497	1.047122183	0.087366167	0.047818999	172	185	0.529782059	0.04359401	0.998180072	1.153313761	0.094902368	0.722825097	0.082286687	0.626737599	NO
190	1180	190	1180	A	GFP.MATA	GFP.MATA	1	NAN	NAN	NAN	NAN	NAN	a	G01	1	G	2	1	2	2	10	19928	16280	6889	5238	-0.584003525	55	5.07952648	5.70477276	0.157300428	5.191328028	0.218244059	0.907268794	0.022598559	0.022916006	0.600688747	0.053740974	0.053689328	0.905311203	0.021348877	0.021604456	5.704664561	0.157602711	0.886587227	0.06470102	0.065364505	-0.120375763	0.073006133	0.073096574	0.000285129	0.168985655	5.715284162	-0.134412762	0.837842019	0.160034453	0.054101223	172	185	0.320501896	0.049876234	1.003058985	0.69771945	0.108578511	0.826989614	0.155619155	1.185275275	NO
189	1188	190	1180	A	m63	CIS	1	NAN	NAN	NAN	NAN	NAN	a	G02	2	G	2	1	2	2	10	19307	15705	6604	5340	-0.347999857	55	5.069701722	5.6867417	0.137045475	5.441868655	0.197614724	0.953783764	0.021151827	0.020923364	0.722487505	0.040672897	0.040650491	0.952126537	0.019912491	0.020216697	5.687109761	0.13763001	1.057591331	0.086536714	0.087779136	0.055993993	0.082293368	0.082589909	0.366381191	0.1573641	5.697729362	0.2316833	0.98729617	0.148412898	0.072353365	172	185	0.469956047	0.068128376	0.999978036	1.023074992	0.148312674	1.129625374	0.144967549	1.104147187	NO
49	2505	191	1182	A	SINGLE.SITE	CYC8_G1010A	2	126	Y126	CYC8	NAN	YES	x	G03	3	G	2	1	2	2	10	18503	15445	7107	6442	0.963159006	52	5.031452968	5.618668745	0.095091935	5.214161417	0.13492771	0.927456726	0.013578732	0.014796703	0.668706144	0.046051938	0.046019424	0.927479076	0.013175948	0.014122076	5.618896034	0.095176431	0.959803877	0.047641216	0.051902594	-0.04102631	0.049467672	0.053303985	0.17363797	0.112826402	5.629515636	0.038940079	0.9018319	0.1038752	0.041762996	172	185	0.384491777	0.037538007	0.988006209	0.83702279	0.081718698	0.622411509	0.097630195	0.743601627	NO
CTRL	1617	191	1182	A	WT	WT	1	NAN	NAN	NAN	NAN	NAN	x	G04	4	G	2	1	2	2	10	18777	15220	6210	5230	-0.256098859	55	5.076712247	5.67501857	0.128916667	5.407143516	0.18636094	0.949986459	0.019649951	0.019831	0.690821777	0.045667636	0.045635928	0.948673059	0.018657017	0.018965233	5.67562486	0.1290236	1.042728615	0.079760283	0.081229956	0.041840945	0.076239714	0.077025826	0.339374979	0.149609519	5.686244461	0.204677089	0.974306455	0.140658317	0.066745787	172	185	0.456966331	0.062520798	0.997962382	0.994796915	0.136105207	1.036647047	0.136817078	1.04206902	NO
141	3250	191	1182	A	SINGLE.SITE	NAM7_G2462A	1	2058	2P06D08	NAM7	NAN	YES	x	G05	5	G	2	1	2	2	10	18541	14692	5916	5033	-0.45877833	56	5.107038425	5.706808215	0.12307902	5.515202022	0.152662645	0.964093281	0.017469125	0.017629093	0.805748738	0.027746603	0.027739486	0.963107425	0.017473816	0.017308598	5.707108931	0.122914461	1.107607455	0.083269009	0.082366967	0.102202243	0.075034521	0.073922356	0.452251774	0.135510927	5.717728532	0.317553883	1.031009258	0.126559725	0.067231954	172	185	0.513669134	0.063006965	1.003487983	1.118236586	0.137163573	1.044708101	0.122660602	0.934246039	NO
172	1617	191	1182	A	WT	WT	1	NAN	NAN	NAN	NAN	NAN	x	G06	6	G	2	1	2	2	10	18169	14824	5459	4916	0.086024687	54	5.067745513	5.668780423	0.103287521	5.387427193	0.159514064	0.947840092	0.018044134	0.017970268	0.71509679	0.041057032	0.041033986	0.947115027	0.017202534	0.017425528	5.66884678	0.10347981	1.036153596	0.071975784	0.073824147	0.035515391	0.069801252	0.070492325	0.327191174	0.137636243	5.679466382	0.192493283	0.968560021	0.128685041	0.060324696	172	185	0.451219898	0.056099708	0.996772798	0.982287165	0.122126757	0.930180004	0.124328976	0.94695323	NO
66	2798	191	1182	A	SINGLE.SITE	CCC2_G2108A	1	135	Y135	CCC2	NAN	YES	x	G07	7	G	2	1	2	2	10	18034	14205	5931	4164	-0.64469632	54	5.068874536	5.669148054	0.14349656	5.353297699	0.200608862	0.941885348	0.020118034	0.020325704	0.686619695	0.045027163	0.04499677	0.940715905	0.018886823	0.019343347	5.669110049	0.143364923	1.009973456	0.075058405	0.077567994	0.009924048	0.074495973	0.076040481	0.277150019	0.152037082	5.67972965	0.142452128	0.945679104	0.14308588	0.063801555	172	185	0.428338981	0.059576566	0.996819003	0.93247635	0.129695735	0.987829222	0.139087426	1.059361153	NO
111	3191	191	1182	A	SINGLE.SITE	ATP23_G476A	1	2204	2P03B06	ATP23	D	YES	x	G09	9	G	2	1	2	2	10	18212	15475	6302	5475	0.822426146	51	5.006304483	5.580146881	0.083532677	5.174745759	0.131584815	0.92755546	0.014880291	0.016213831	0.669864047	0.046180041	0.046147255	0.927281836	0.014261316	0.015814336	5.579961105	0.083662572	0.959094878	0.051269053	0.05663294	-0.041765275	0.053532957	0.058817917	0.172095551	0.12329931	5.590580706	0.03739766	0.901212249	0.114348109	0.04590277	172	185	0.383872126	0.041677781	0.981172948	0.835673835	0.090730816	0.69105242	0.108572044	0.826940357	NO
24	1597	191	1182	A	EMS.MUTANT	1P11D07	1	1597	1P11D07	NAN	NAN	NAN	x	G10	10	G	2	1	2	2	10	14649	10753	3213	3032	-0.346114984	56	5.139844532	5.71763181	0.070354947	5.625244006	0.087956901	0.984125304	0.007558085	0.007638665	0.804997513	0.031329018	0.031318774	0.984097229	0.007154796	0.007382176	5.717456126	0.070223301	1.216031127	0.040208327	0.041124236	0.195592381	0.033056503	0.033892666	0.616392106	0.05741612	5.728075727	0.481694215	1.125769368	0.048464918	0.030338418	172	185	0.608429245	0.02611343	1.005303964	1.324525451	0.056847863	0.432982474	0.042919419	0.326896304	NO
20	1577	191	1182	A	EMS.MUTANT	1P05D03	1	1577	1P05D03	NAN	NAN	NAN	x	G11	11	G	2	1	2	2	10	13701	9840	3490	3343	0.149939164	58	5.182304815	5.75839179	0.078677142	5.726281278	0.110577523	0.994589505	0.00919987	0.009306257	0.714649309	0.048614302	0.048576058	0.99458392	0.008359064	0.008657537	5.758315217	0.078932668	1.277243395	0.050815458	0.05231424	0.244704158	0.039823223	0.041057087	0.698398067	0.067288552	5.768934818	0.563700176	1.179267662	0.05833735	0.039639383	172	185	0.661927538	0.035414395	1.012474925	1.440989036	0.077095681	0.587200236	0.053501921	0.40749806	NO
CTRL	1617	191	1182	A	WT	WT	1	NAN	NAN	NAN	NAN	NAN	x	G12	12	G	2	1	2	2	10	19969	15970	6042	5078	-0.388479232	55	5.079597839	5.688304113	0.130846733	5.426517768	0.177762558	0.950962673	0.018630948	0.018794298	0.752371252	0.034912237	0.034898063	0.949504292	0.018362769	0.018241135	5.688528629	0.130948785	1.046269401	0.077371181	0.078147682	0.045230885	0.074317506	0.074143675	0.345875236	0.143000016	5.69914823	0.211177345	0.977401031	0.134048814	0.064024242	172	185	0.460060908	0.059799253	1.000227054	1.001533681	0.130180515	0.991521554	0.129981166	0.990003205	NO
117	3202	191	1182	A	OFF.TARGET	FRA1_G2175A	2	2012	2P01C08	FRA1	NAN	YES	x	H01	1	H	2	1	2	2	10	20326	16382	6318	5265	-0.392250399	55	5.066182991	5.686167765	0.14595375	5.319709694	0.182778574	0.933024667	0.017105585	0.017603001	0.689373361	0.042849827	0.04282363	0.932113444	0.016113104	0.01661577	5.686128647	0.145885914	0.976781194	0.060355517	0.062932293	-0.023492609	0.061830319	0.063596715	0.209878736	0.131933799	5.693701592	0.075563077	0.916829112	0.120745425	0.05035651	172	185	0.399488989	0.046131521	0.999271144	0.869671104	0.100426425	0.764899148	0.115476327	0.879526921	NO
CTRL	1617	191	1182	A	WT	WT	1	NAN	NAN	NAN	NAN	NAN	x	H02	2	H	2	1	2	2	10	19645	15579	6331	5067	-0.477219076	55	5.074442893	5.698392008	0.153213859	5.437756903	0.203458653	0.95218217	0.020187266	0.019900628	0.687570197	0.046436253	0.046402919	0.950739681	0.01865419	0.018819226	5.698357395	0.153221378	1.051574456	0.080269893	0.081289422	0.050288523	0.076681652	0.076772995	0.355535975	0.147318883	5.70593034	0.221220316	0.982221911	0.136130508	0.065674767	172	185	0.464881788	0.061449778	1.001417346	1.012028538	0.13377364	1.018888638	0.132183664	1.006778563	NO
93	3092	191	1182	A	SINGLE.SITE	SSN2_C2911T	2	89	Y89	SSN2	NAN	YES	x	H03	3	H	2	1	2	2	10	19665	15923	7806	6953	0.237060833	53	5.061053602	5.629054678	0.121119191	5.398446969	0.194058956	0.958524648	0.023078735	0.022547679	0.55704445	0.071322846	0.071202275	0.957784877	0.022146732	0.021079574	5.628847887	0.121645214	1.082827616	0.10055041	0.096065713	0.079575783	0.093031174	0.088089225	0.410629428	0.164765395	5.636420832	0.27631377	1.009546987	0.153577021	0.078288161	172	185	0.492206864	0.074063173	0.989218103	1.071514106	0.161232482	1.228029257	0.150471638	1.146069146	NO
11	1480	191	1182	A	EMS.MUTANT	1P06B05	1	1480	1P06B05	NAN	NAN	NAN	x	H05	5	H	2	1	2	2	10	19628	15506	6221	5343	-0.445677931	54	5.062797429	5.677734668	0.158104603	5.379202145	0.217620225	0.94592024	0.022163269	0.021185037	0.70990117	0.041569232	0.041545313	0.944911188	0.020616245	0.020300747	5.678022228	0.158222232	1.026988953	0.084922114	0.084311398	0.026631175	0.082621356	0.081196349	0.309957143	0.159920929	5.685595173	0.175641484	0.960726461	0.148732555	0.068557421	172	185	0.443386338	0.064332433	0.997848429	0.965233828	0.140049062	1.066685464	0.145093404	1.105105761	NO
CTRL	1617	191	1182	A	WT	WT	1	NAN	NAN	NAN	NAN	NAN	x	H06	6	H	2	1	2	2	10	18547	14811	5601	4775	-0.382452796	55	5.07641993	5.689027231	0.132513052	5.428048899	0.178673628	0.950847002	0.019020042	0.018686193	0.765335549	0.032608642	0.032597092	0.949765439	0.018251056	0.018215364	5.688889835	0.131795089	1.047386558	0.078219439	0.078690364	0.046298069	0.074465323	0.074336868	0.347917399	0.143699296	5.69646278	0.213601741	0.978560373	0.132510922	0.06344334	172	185	0.46122025	0.059218352	0.999755745	1.00405752	0.128915917	0.981889728	0.128394952	0.97792179	NO
135	3241	191	1182	A	SINGLE.SITE	CAF40_G674A	1	2037	2P03H11	CAF40	NAN	YES	x	H07	7	H	2	1	2	2	10	21875	17489	6831	5917	-0.19591441	53	5.037996894	5.641027688	0.120963793	5.352479667	0.166892355	0.946236037	0.017799454	0.017903881	0.768064545	0.031584935	0.031574438	0.945194446	0.017556518	0.017457562	5.641160819	0.120677931	1.028158052	0.072164551	0.072368863	0.027768902	0.070372786	0.069875068	0.312172221	0.136964737	5.648733764	0.177856562	0.961748621	0.125776363	0.058104459	172	185	0.444408497	0.053879471	0.99137908	0.967459026	0.117293393	0.893366621	0.121238615	0.923415459	NO
62	2728	191	1182	A	SINGLE.SITE	TYE7_�C391T	1	134	Y134	TYE7	NAN	YES	x	H08	8	H	2	1	2	2	10	20668	17354	7248	6090	-0.113991479	53	5.029171139	5.637572278	0.108913436	5.217670782	0.156406776	0.923754201	0.017876413	0.018065229	0.752184032	0.030433343	0.030423952	0.922887592	0.017876039	0.017728253	5.637683395	0.108995346	0.943579614	0.0624788	0.061535322	-0.058074536	0.06617479	0.064840341	0.137732542	0.138656326	5.64525634	0.003416883	0.887800505	0.127467952	0.049459902	172	185	0.370460381	0.045234913	0.990768776	0.806477019	0.098474546	0.750032638	0.122104591	0.930011173	NO
52	2522	191	1182	A	SINGLE.SITE	CHD1_G2723A	1	54	Y54	CHD1	NAN	YES	x	H09	9	H	2	1	2	2	10	18964	15568	6237	5423	0.066587113	54	5.0601168	5.671119131	0.112432373	5.402551962	0.167247623	0.949947209	0.018315495	0.018209783	0.730177754	0.038752396	0.038733015	0.948783477	0.017709494	0.017676773	5.671134552	0.112294942	1.043197636	0.075021471	0.075986751	0.042290646	0.07211641	0.071988767	0.340238451	0.139831779	5.678707496	0.205922792	0.97489794	0.128643404	0.06112051	172	185	0.457557816	0.056895521	0.99663961	0.996084554	0.12385921	0.943375253	0.12434608	0.947083507	NO
CTRL	1617	191	1182	A	WT	WT	1	NAN	NAN	NAN	NAN	NAN	x	H10	10	H	2	1	2	2	10	19717	15733	5818	5033	-0.247108764	55	5.094841869	5.70113088	0.140922043	5.439444806	0.188440089	0.951727756	0.018318078	0.018477658	0.741742672	0.036832181	0.036815539	0.950673928	0.017719158	0.017847804	5.701035096	0.141078048	1.051290804	0.076216459	0.077040903	0.050018747	0.072467355	0.07282668	0.355021788	0.139691201	5.708608041	0.220706129	0.981973911	0.128502826	0.061963001	172	185	0.464633787	0.057738012	1.001887295	1.011488651	0.125693279	0.957344464	0.124265635	0.946470791	NO
130	3227	191	1182	A	SINGLE.SITE	ADE5_G2081A	2	1597	1P11D07	ADE5	NAN	YES	x	H11	11	H	2	1	2	2	10	14292	10054	2225	2055	-1.027088115	58	5.152049352	5.736351078	0.063347051	5.671325606	0.082786807	0.988633205	0.007373741	0.007660746	0.879360124	0.019049232	0.019046928	0.988568726	0.007336194	0.007577146	5.736377353	0.06344374	1.241519321	0.042633274	0.043667073	0.216335888	0.034401228	0.035272047	0.651359231	0.058871358	5.743950298	0.517043573	1.148293373	0.047682984	0.030922949	172	185	0.630953249	0.02669796	1.008090025	1.373559282	0.058120362	0.442674479	0.04231369	0.322282762	NO
8	134	190	1180	A	EMS.MUTANT	Y134	1	134	Y134	NAN	NAN	NAN	a	H12	12	H	2	1	2	2	10	19120	16068	6364	5593	0.046931802	53	5.034845161	5.632367184	0.100140381	5.014646525	0.189771966	0.888539098	0.025349542	0.025588836	0.512142756	0.06682738	0.066728164	0.887751874	0.024816423	0.024572647	5.633031921	0.1005511	0.836958769	0.065148198	0.065908903	-0.17798047	0.077871633	0.07738219	-0.137028884	0.195472947	5.640604866	-0.271344543	0.794580404	0.184284572	0.054326766	170	171	0.278441078	0.050230859	0.999526242	0.741491525	0.133765308	0.852689553	0.18040032	1.149965339	NO
140	3248	191	1182	A	SINGLE.SITE	BRE2_G405A	2	2067	2P07D07	BRE2	NAN	YES	x	A02	2	A	3	1	2	2	11	18831	14480	5948	4217	-0.657998106	54	5.085916834	5.664695554	0.154337403	5.380204003	0.227897772	0.947817483	0.019900542	0.02053213	0.628864813	0.056305351	0.056245962	0.946175399	0.018139009	0.018650855	5.665262223	0.155162727	1.032226838	0.075672328	0.078327583	0.031718447	0.073137236	0.075012728	0.319843275	0.14710934	5.683590565	0.195828249	0.970125989	0.133736853	0.062902301	172	185	0.452785866	0.058677313	0.997496611	0.985696213	0.127738098	0.972918851	0.129591751	0.987037221	NO
72	2906	191	1182	A	SINGLE.SITE	ADE4_C734T	1	1509	1P12D09	ADE4	NAN	YES	x	A03	3	A	3	1	2	2	11	21595	17820	6981	6415	0.228493013	52	5.012123812	5.608906677	0.074489527	5.343467677	0.127856497	0.951314404	0.015449812	0.015291588	0.63190647	0.056946559	0.056885121	0.951103596	0.014936368	0.014710155	5.608924502	0.074713553	1.053146993	0.064967098	0.063966412	0.051782818	0.061637611	0.060349536	0.358381793	0.115595371	5.627252844	0.234366767	0.988606154	0.102222884	0.049968997	172	185	0.471266031	0.045744009	0.987609079	1.025926773	0.099582826	0.758473864	0.097066212	0.739306044	NO
CTRL	1617	191	1182	A	WT	WT	1	NAN	NAN	NAN	NAN	NAN	x	A05	5	A	3	1	2	2	11	19252	14654	6483	3849	-0.872679688	54	5.063875341	5.670940354	0.152567453	5.405682667	0.218172786	0.950433358	0.021119207	0.021817953	0.649306472	0.053099992	0.053050169	0.948719468	0.019719405	0.020370211	5.671484966	0.153021518	1.042925697	0.084482014	0.087288304	0.042029934	0.080489654	0.08264538	0.3397379	0.160709462	5.689813308	0.215722874	0.979577004	0.147336975	0.070691519	172	185	0.46223688	0.06646653	0.998588732	1.006270683	0.144694904	1.10207058	0.143793222	1.09520291	NO
51	2507	191	1182	A	SINGLE.SITE	WWM1_C313T	2	96	Y96	WWM1	NAN	YES	x	A06	6	A	3	1	2	2	11	18966	15536	6467	5015	-0.417481596	54	5.070735476	5.678566631	0.146332515	5.376222808	0.19398844	0.944528611	0.019488902	0.019699438	0.731013179	0.037600234	0.037582529	0.94332664	0.018838963	0.018990102	5.678730417	0.146313091	1.020496549	0.07651009	0.078071186	0.020289322	0.074876201	0.075614253	0.297565967	0.149930922	5.69705876	0.173550941	0.959763844	0.136558434	0.062814377	172	185	0.442423721	0.058589388	0.999860342	0.96313825	0.127546689	0.971460985	0.132428225	1.008641268	NO
63	2729	191	1182	A	SINGLE.SITE	TYE7_�C391T	2	134	Y134	TYE7	NAN	YES	x	A07	7	A	3	1	2	2	11	20420	16261	6757	5105	-0.615710522	54	5.050741917	5.663710346	0.146767615	5.219039352	0.184881721	0.919202086	0.018809299	0.019312486	0.715670004	0.035936174	0.035920717	0.918113662	0.018333638	0.018667802	5.663541412	0.146672991	0.927317149	0.060987318	0.063063405	-0.075459648	0.065735066	0.067217279	0.100400399	0.14750467	5.681869754	-0.023614627	0.877452278	0.134132182	0.050657715	172	185	0.360112154	0.046432727	0.997194601	0.783949353	0.101082137	0.769893385	0.128939627	0.982070311	NO
132	3229	191	1182	A	SINGLE.SITE	CIA2_G626A	2	2154	2P16H09	CIA2	B	YES	x	A08	8	A	3	1	2	2	11	18727	14579	6541	3588	-0.919529357	55	5.079614867	5.68148365	0.151959873	5.282470297	0.214839619	0.92669548	0.022777092	0.023319435	0.622095379	0.053612774	0.053561496	0.924900395	0.021503817	0.021962501	5.681822405	0.151849445	0.950620312	0.074977423	0.077532004	-0.05064055	0.078806304	0.080754518	0.153472679	0.171973039	5.700150748	0.029457653	0.898037512	0.158600551	0.063163516	172	185	0.380697389	0.058938528	1.000403001	0.828762563	0.128306752	0.977250009	0.154817263	1.179167657	NO
CTRL	1617	191	1182	A	WT	WT	1	NAN	NAN	NAN	NAN	NAN	x	A09	9	A	3	1	2	2	11	19773	15314	7207	4225	-0.787569614	54	5.068296632	5.66946379	0.133803715	5.393576958	0.209728146	0.949351437	0.022391751	0.023916646	0.648302956	0.053099992	0.053050169	0.947853398	0.020905726	0.022723651	5.669166317	0.133697204	1.039259592	0.0885053	0.097370731	0.038508529	0.085087223	0.091928275	0.332965228	0.180490837	5.687494659	0.208950202	0.976338489	0.16711835	0.079641305	172	185	0.458998366	0.075416316	0.998181798	0.999220571	0.16417822	1.250465508	0.164306285	1.251440918	NO
50	2506	191	1182	A	SINGLE.SITE	WWM1_C313T	1	96	Y96	WWM1	NAN	YES	x	A10	10	A	3	1	2	2	11	18825	15726	6761	4923	-0.486031597	54	5.061477495	5.673704544	0.139830346	5.369355032	0.179971519	0.944178434	0.017927314	0.018427865	0.750453582	0.034144332	0.034131073	0.942914851	0.01766805	0.01780018	5.673798576	0.139824651	1.018822445	0.07173343	0.072343993	0.018647495	0.070410599	0.070524246	0.294345774	0.139380309	5.692126918	0.170330748	0.958284996	0.126007821	0.057774942	172	185	0.440944873	0.053549953	0.998994781	0.959918859	0.116576047	0.887902945	0.121443646	0.924977082	NO
88	3065	191	1182	A	SINGLE.SITE	ADE5_G1385A	1	1600	1P12F03	ADE5	NAN	YES	x	A12	12	A	3	1	2	2	11	12130	7908	3048	1551	-1.150886312	61	5.218442194	5.818368435	0.077450569	5.782869471	0.102468013	0.993680143	0.008939563	0.010224409	0.949796756	0.007542215	0.007542072	0.993552386	0.009034448	0.010189767	5.818361016	0.077488496	1.270997152	0.054258495	0.059994594	0.239801751	0.042821185	0.047791641	0.690331465	0.077792309	5.836689359	0.566316439	1.181047702	0.064419822	0.043887004	172	185	0.663707578	0.039662015	1.024366163	1.44486411	0.086342577	0.657629338	0.059758268	0.455149611	NO
54	2524	191	1182	A	SINGLE.SITE	ADE2_G34A	2	NAN	NAN	ADE2	NAN	YES	x	B02	2	B	3	1	2	2	11	13502	10413	4013	3662	-0.545911153	54	5.069036434	5.673819146	0.09497181	5.501437904	0.12410128	0.969501407	0.012030159	0.011835528	0.73582471	0.04118508	0.041161818	0.969785791	0.011249814	0.011291491	5.673882395	0.094953447	1.140194562	0.056268186	0.056014928	0.131198915	0.049255183	0.049273026	0.504476626	0.087466966	5.698075652	0.38451959	1.067801413	0.080300794	0.045612396	172	185	0.55046129	0.041387407	1.000038812	1.198331596	0.090098684	0.686237777	0.075186772	0.572661006	NO
CTRL	1617	191	1182	A	WT	WT	1	NAN	NAN	NAN	NAN	NAN	x	B03	3	B	3	1	2	2	11	17889	14375	5535	4675	-0.303754512	55	5.081408056	5.686784583	0.13783606	5.414195934	0.188345774	0.948913676	0.019168777	0.01884522	0.722712568	0.039776627	0.039755669	0.948094513	0.018133434	0.018121938	5.686644491	0.137985595	1.04027775	0.076958857	0.077647218	0.039487745	0.073700135	0.073666693	0.334850753	0.143659304	5.710837748	0.214893717	0.979179343	0.136493132	0.065434421	172	185	0.46183922	0.061209433	1.002278619	1.005404993	0.133250418	1.014903508	0.132534072	1.009447452	NO
42	2175	191	1182	A	EMS.MUTANT	2P18H11	1	2175	2P18H11	NAN	NAN	NAN	x	B05	5	B	3	1	2	2	11	18552	15183	6842	4645	-0.57822975	54	5.062451238	5.663885532	0.124717771	5.307994228	0.176801989	0.935024776	0.018365814	0.019938597	0.674917429	0.045923836	0.045891592	0.933842453	0.018073768	0.018974133	5.663953314	0.12465785	0.98327443	0.068060525	0.071631774	-0.016867022	0.069571328	0.072363545	0.223399598	0.148154957	5.688146571	0.103442563	0.928619761	0.140988785	0.06046129	172	185	0.411279638	0.056236302	0.998296212	0.895338861	0.122424117	0.932444846	0.136734953	1.04144351	NO
CTRL	1617	191	1182	A	WT	WT	1	NAN	NAN	NAN	NAN	NAN	x	B07	7	B	3	1	2	2	11	18514	14713	5492	4775	-0.274483141	54	5.084033459	5.68353602	0.123679361	5.407311007	0.174448785	0.948917878	0.019069832	0.018855041	0.693004376	0.045027163	0.04499677	0.947890466	0.018069614	0.018051971	5.683744921	0.12354033	1.039415996	0.075691146	0.076949951	0.038659013	0.073170094	0.073214064	0.333255103	0.142596604	5.707938178	0.213298067	0.978415003	0.135430432	0.064821451	172	185	0.46107488	0.060596462	1.001769731	1.003741056	0.131916007	1.004739953	0.131424342	1.000995174	NO
185	3139	191	1182	A	NULL	NULL	1	NAN	NAN	NAN	NAN	NAN	x	B08	8	B	3	1	2	2	11	18597	15346	4821	4661	0.229669145	53	5.058712199	5.644062235	0.082007367	2.920645001	0.188318656	0.516965141	0.031087212	0.033977269	0.298966775	0.038624373	0.038605183	0.516858727	0.030402283	0.033858556	5.643602663	0.082716787	0.518327563	0.004431199	0.004769198	-0.657147876	0.008560304	0.009183209	-3.037414519	0.257163535	5.66779592	-3.157371555	0.516231165	0.249997363	0.004112204	172	185	-0.001108958	-0.000112784	0.994724578	-0.002414157	-0.000245526	-0.001870055	0.101702745	0.774620256	NO
157	3275	191	1182	A	SINGLE.SITE	ADE2_C1477T	2	2217	2P09C10	ADE2	NAN	YES	x	B09	9	B	3	1	2	2	11	17179	13886	6963	6423	-0.143939369	53	5.076151426	5.632367184	0.129304601	5.486329864	0.155630107	0.973466775	0.011643419	0.011745804	0.797730939	0.031201062	0.031190943	0.973831152	0.010904708	0.01114321	5.632424373	0.129228001	1.160777689	0.056328042	0.056940162	0.149090202	0.048553847	0.049262552	0.536111355	0.086143039	5.65661763	0.416154319	1.086057793	0.078976867	0.046302211	172	185	0.56871767	0.042077223	0.992762736	1.238074984	0.091600384	0.697675494	0.073986136	0.563516348	NO
131	3228	191	1182	A	SINGLE.SITE	CIA2_G626A	1	2154	2P16H09	CIA2	B	YES	x	B10	10	B	3	1	2	2	11	18532	15932	6722	5295	-0.15441581	54	5.06268497	5.651985105	0.095505047	5.21861427	0.169701411	0.920672197	0.020667368	0.021176592	0.648801658	0.048101779	0.048064731	0.920053179	0.020051578	0.020539465	5.652097242	0.095971847	0.933851007	0.067751886	0.070477022	-0.068438375	0.072868059	0.074470845	0.115567422	0.162363701	5.676290499	-0.004389613	0.884783234	0.155197529	0.059751213	172	185	0.36744311	0.055526225	0.996215416	0.799908543	0.120878308	0.920671176	0.151115161	1.15097055	NO
CTRL	1617	191	1182	A	WT	WT	1	NAN	NAN	NAN	NAN	NAN	x	B11	11	B	3	1	2	2	11	18695	15219	4930	4507	0.131880987	53	5.059991086	5.652143801	0.084993171	5.3655666	0.142090748	0.947198241	0.017790237	0.017619691	0.712242964	0.041569232	0.041545313	0.946849099	0.017319112	0.017268467	5.65250937	0.084910232	1.035039336	0.071996379	0.072721536	0.034439432	0.069772191	0.069662017	0.325111608	0.135862798	5.676702628	0.205154572	0.974533087	0.128696626	0.061098841	172	185	0.457192963	0.056873852	0.996287746	0.995290283	0.123812038	0.943015968	0.124397917	0.947478322	NO
139	3247	191	1182	A	SINGLE.SITE	BRE2_G405A	1	2067	2P07D07	BRE2	NAN	YES	x	B12	12	B	3	1	2	2	11	13939	10180	3965	3467	-0.195212762	57	5.187925997	5.753903109	0.153014889	5.549113662	0.208213267	0.961859496	0.015455943	0.015886416	0.698355274	0.045795735	0.04576376	0.961880206	0.014318323	0.014545052	5.754460949	0.153447621	1.101802144	0.067535438	0.06916421	0.096947152	0.061215323	0.062178277	0.442654918	0.114886904	5.778654207	0.322697882	1.03374893	0.107720732	0.05751929	172	185	0.516408806	0.053294301	1.014180723	1.124200739	0.116019502	0.883664019	0.103201767	0.786037572	NO
170	629	170	629	A	WT	WT	1	NAN	NAN	NAN	NAN	NAN	a	C01	1	C	3	1	2	2	11	19516	16389	4887	4489	0.240552234	53	5.047144977	5.629050597	0.06500717	5.231158541	0.154235583	0.928845901	0.021841558	0.022091574	0.324983723	0.107276026	0.106867328	0.928799714	0.020809566	0.02108357	5.629262691	0.06532677	0.964579317	0.07534578	0.07645467	-0.036063214	0.078400819	0.078682331	0.183965358	0.164490404	5.651535667	0.058649038	0.909834485	0.15475294	0.063456801	170	171	0.393695158	0.059360894	1.001463201	1.048414356	0.158078687	1.00767566	0.150778827	0.961142561	NO
115	3198	191	1182	A	SINGLE.SITE	MOD5_G765A	2	2182	2P19F12	MOD5	C	YES	x	C02	2	C	3	1	2	2	11	19897	16072	6276	4948	-0.441884539	53	5.054210077	5.639912605	0.112129216	5.401936182	0.187387286	0.954957083	0.021253619	0.020763963	0.643908616	0.055151292	0.055095477	0.954173077	0.020010897	0.019687983	5.640088435	0.112423697	1.066590298	0.087941844	0.08657917	0.064466923	0.083087737	0.080932325	0.382385141	0.152748639	5.662361411	0.257068821	0.999830388	0.143011176	0.071512483	172	185	0.482490264	0.067287494	0.993770796	1.050361468	0.146482109	1.115682851	0.139458761	1.062189433	NO
6	123	190	1180	A	EMS.MUTANT	Y123	1	123	Y123	NAN	NAN	NAN	a	C03	3	C	3	1	2	2	11	21675	17139	6511	5345	-0.172256645	53	5.019267096	5.613512013	0.09384612	5.279990719	0.184123136	0.938800151	0.023270271	0.02373228	0.520393446	0.074535639	0.074398068	0.938045702	0.022438376	0.022584847	5.613598204	0.094394364	0.999430607	0.087848746	0.087256279	-0.000569555	0.087865898	0.086959927	0.256269018	0.17463535	5.63587118	0.130952698	0.940580913	0.164897887	0.072686781	170	171	0.424441587	0.068590874	0.998687423	1.13029242	0.182658221	1.164358377	0.161602624	1.030139065	NO
CTRL	1617	191	1182	A	WT	WT	1	NAN	NAN	NAN	NAN	NAN	x	C04	4	C	3	1	2	2	11	18804	15101	5604	4953	-0.134728883	55	5.077873312	5.689978878	0.132486567	5.413785768	0.184242586	0.949081082	0.018948253	0.018589756	0.710367144	0.041953396	0.041928808	0.947935081	0.017963478	0.017835421	5.689768414	0.132269434	1.0396043	0.075434567	0.075878325	0.03884016	0.072518884	0.072263126	0.333603989	0.140561718	5.71204139	0.208287669	0.97602286	0.130824254	0.062303832	172	185	0.458682736	0.058078844	1.002489864	0.998533458	0.126435255	0.962995734	0.12662095	0.964410082	NO
171	880	190	1180	A	NULL	NULL	1	NAN	NAN	NAN	NAN	NAN	a	C05	5	C	3	1	2	2	11	19366	15249	5012	4840	-0.212761453	52	5.044073804	5.617627203	0.08339669	2.896526217	0.196974619	0.515703773	0.033699042	0.035674249	0.286499299	0.040800941	0.040778323	0.515709115	0.033253648	0.035528376	5.617178926	0.083638873	0.518161588	0.004808029	0.004846348	-0.65746814	0.009269627	0.009342149	-3.046404487	0.263683498	5.639451902	-3.171720807	0.51599682	0.253946034	0.004117645	170	171	-0.000142506	2.17E-05	0.999321934	-0.000379496	5.79E-05	0.000369022	-0.152544851	-0.972400115	NO
128	3225	191	1182	A	SINGLE.SITE	ADE5_G1715A	2	1581	1P06E01	ADE5	NAN	YES	x	C06	6	C	3	1	2	2	11	15445	11052	2771	2641	-0.711131547	58	5.170358432	5.74970154	0.073826757	5.670717011	0.114939009	0.986218661	0.012713269	0.012692256	0.706700936	0.048614302	0.048576058	0.98605861	0.012074113	0.012228604	5.749851773	0.073707966	1.227101643	0.068327429	0.068978631	0.204655001	0.055845036	0.05634116	0.631730116	0.094839522	5.772124749	0.506413796	1.141436352	0.085102059	0.054606091	172	185	0.624096229	0.050381103	1.013034773	1.358631831	0.10967759	0.835360761	0.080726498	0.614854401	NO
167	R484	191	1182	A	RAP1.MUTANT	PLATE	1	NAN	NAN	RAP1	NAN	NAN	x	C07	7	C	3	1	2	2	11	21223	16449	7940	7501	0.054555787	52	5.034631662	5.607631922	0.104515558	5.496065733	0.144383563	0.977377036	0.013476707	0.013906711	0.622789921	0.063232951	0.063148876	0.976926512	0.012514318	0.012465128	5.607765463	0.104720867	1.176972779	0.066283912	0.066204138	0.1629457	0.056342211	0.055999189	0.560317077	0.09776293	5.630038439	0.435000757	1.097211776	0.088025467	0.05258902	182	185	0.579871653	0.048364031	0.988141355	1.268027779	0.105759498	0.820857187	0.083404717	0.64734953	NO
CTRL	1617	191	1182	A	WT	WT	1	NAN	NAN	NAN	NAN	NAN	x	C08	8	C	3	1	2	2	11	18819	15151	6154	4999	-0.388168573	55	5.077374506	5.690566402	0.140960854	5.423606271	0.192930656	0.950946747	0.019288286	0.019086955	0.721680808	0.040288773	0.040266996	0.949799561	0.018332333	0.018319623	5.690937231	0.141091976	1.047532698	0.078136098	0.078884008	0.046437588	0.074975463	0.074633607	0.348184235	0.144014482	5.713210207	0.222867916	0.983017434	0.134277018	0.06488739	172	185	0.46567731	0.060662401	1.002694997	1.013760358	0.132059554	1.005833274	0.130267032	0.992180514	NO
23	1595	191	1182	A	EMS.MUTANT	1P11B11	1	1595	1P11B11	NAN	NAN	NAN	x	C10	10	C	3	1	2	2	11	21610	17852	8547	8259	0.505377531	52	5.0436104	5.621081724	0.087769009	5.461809055	0.140928917	0.971258245	0.013184955	0.012846833	0.440112572	0.094491719	0.094211987	0.972337729	0.00996914	0.010382257	5.621261282	0.088045481	1.153103106	0.051027778	0.05268373	0.142456662	0.044189343	0.045772118	0.524432782	0.080639893	5.643534258	0.399116462	1.076153526	0.070902429	0.040866129	172	185	0.558813403	0.036641141	0.990466543	1.216513803	0.079766257	0.607540712	0.065569545	0.499411277	NO
18	1572	191	1182	A	EMS.MUTANT	1P03E05	1	1572	1P03E05	NAN	NAN	NAN	x	C11	11	C	3	1	2	2	11	13723	9681	2337	2162	-0.930980406	57	5.148604532	5.733185223	0.067160012	5.659488802	0.091466639	0.987121822	0.008157855	0.007960951	0.784028343	0.035424196	0.03540939	0.987228442	0.007543625	0.007650778	5.733116848	0.067037905	1.233785752	0.043246046	0.043641385	0.21008729	0.035119082	0.035466721	0.640878204	0.059456637	5.755389824	0.515561884	1.147333193	0.049719174	0.032195702	172	185	0.629993069	0.027970713	1.010097716	1.37146901	0.060891092	0.463777781	0.044398446	0.338161328	NO
CTRL	1617	191	1182	A	WT	WT	1	NAN	NAN	NAN	NAN	NAN	x	C12	12	C	3	1	2	2	11	18628	14580	5851	4511	-0.575451731	54	5.060970706	5.671556038	0.144272722	5.405071317	0.201240332	0.95062289	0.020481483	0.020424426	0.692342847	0.045539538	0.045508097	0.94891148	0.019701575	0.019424936	5.671340057	0.144226846	1.04374186	0.082872861	0.083445406	0.042812198	0.079550918	0.078979579	0.341239438	0.153403659	5.693613033	0.215923118	0.979673089	0.143666195	0.068944102	172	185	0.462332966	0.064719113	0.999255601	1.006479857	0.140890849	1.073096948	0.139983774	1.0661882	NO
38	2142	191	1182	A	EMS.MUTANT	2P15E04	1	2142	2P15E04	NAN	NAN	NAN	x	D01	1	D	3	1	2	2	11	19720	15439	4902	4545	-0.231328652	55	5.114382112	5.706167954	0.089920262	5.507581991	0.139298234	0.962335917	0.018164649	0.018511088	0.787948044	0.030561293	0.030551784	0.961658432	0.018150779	0.018273834	5.706169274	0.090003631	1.100758979	0.086039722	0.084775156	0.095999923	0.07751984	0.077096794	0.44092064	0.141062276	5.732791289	0.317094756	1.030765413	0.134256053	0.071287714	172	185	0.513425289	0.067062725	1.006131568	1.117705746	0.145992796	1.111955991	0.130618274	0.994855753	NO
CTRL	1617	191	1182	A	WT	WT	1	NAN	NAN	NAN	NAN	NAN	x	D02	2	D	3	1	2	2	11	18393	15005	6432	5162	-0.412629828	55	5.074731665	5.68433135	0.137427576	5.418728743	0.189642126	0.949877995	0.019194441	0.019445723	0.686647147	0.046308146	0.046275087	0.948284335	0.018380724	0.018449843	5.684606605	0.137721882	1.041080662	0.077576453	0.078595778	0.040259272	0.074701085	0.074756052	0.336335161	0.145198591	5.71122862	0.212509277	0.978037611	0.138392368	0.066186902	172	185	0.460697487	0.061961914	1.002347219	1.002919488	0.134888539	1.027380278	0.13449588	1.024389584	NO
174	2003	191	1182	A	CHR2SNP.69593(T)	POLYMORPHISM	1	NAN	NAN	NAN	NAN	NAN	x	D03	3	D	3	1	2	2	11	19340	15264	6287	4902	-0.556767234	55	5.074095028	5.685956146	0.141113701	5.422600508	0.195969565	0.951838318	0.019558323	0.019596954	0.684890099	0.046948695	0.046914246	0.950749214	0.018070987	0.018543253	5.686145448	0.141734208	1.051615593	0.077240545	0.080825706	0.050327642	0.073586353	0.075961891	0.355610524	0.146467581	5.712767463	0.23178464	0.987345577	0.139661358	0.068093767	172	185	0.470005454	0.063868778	1.002617293	1.023182549	0.139039705	1.058997683	0.135889441	1.03500366	NO
89	3068	191	1182	A	SINGLE.SITE	ADE5_G1715A	1	1581	1P06E01	ADE5	NAN	YES	x	D04	4	D	3	1	2	2	11	14641	10481	4515	2962	-0.910126375	56	5.165724462	5.719516486	0.150866886	5.619849466	0.221390426	0.978855186	0.018484204	0.018283872	0.617193279	0.063232951	0.063148876	0.979190042	0.015117178	0.01471248	5.719723079	0.151736553	1.189066321	0.081258226	0.078320773	0.173168395	0.068535859	0.066101658	0.578017892	0.11362625	5.746345094	0.454192008	1.108787923	0.106820027	0.065054011	172	185	0.591447799	0.060829022	1.008510323	1.287557542	0.13242228	1.008595987	0.10284766	0.783340514	NO
36	2100	191	1182	A	EMS.MUTANT	2P11C10	1	2100	2P11C10	NAN	NAN	NAN	x	D05	5	D	3	1	2	2	11	19057	16255	5070	4701	0.636442734	53	5.044228322	5.630140963	0.067921381	5.263290389	0.121431158	0.934263728	0.016037562	0.016295916	0.641798556	0.051946332	0.051899683	0.934210195	0.015857208	0.015953407	5.630017892	0.06790901	0.98466683	0.05950017	0.060874527	-0.015451939	0.06088598	0.061346707	0.22627534	0.125544347	5.656639906	0.102449456	0.928194091	0.118738124	0.050868827	172	185	0.410853968	0.046643839	0.992766645	0.894412195	0.101541719	0.773393801	0.113528997	0.864695054	NO
CTRL	1617	191	1182	A	WT	WT	1	NAN	NAN	NAN	NAN	NAN	x	D06	6	D	3	1	2	2	11	19297	15304	6355	4940	-0.558761901	55	5.083132074	5.6888659	0.153035122	5.420553932	0.208613526	0.949846159	0.019582399	0.01933585	0.689320364	0.045795735	0.04576376	0.948223457	0.017985376	0.018142602	5.688774175	0.153269493	1.04082303	0.076184986	0.077012898	0.040011774	0.07335528	0.073413968	0.335859096	0.142342112	5.71539619	0.212033212	0.977809984	0.135535889	0.064789924	172	185	0.460469861	0.060564936	1.003078647	1.002423955	0.131847375	1.004217216	0.131528556	1.001788925	NO
190	1180	190	1180	A	GFP.MATA	GFP.MATA	1	NAN	NAN	NAN	NAN	NAN	a	D07	7	D	3	1	2	2	11	17721	13380	5870	3724	-0.76634092	54	5.062282457	5.671037162	0.134829287	5.147450613	0.213422207	0.905464684	0.023316297	0.023531733	0.554146055	0.061949626	0.061870558	0.903408017	0.021203637	0.022040437	5.670461332	0.134854095	0.880873069	0.06363648	0.065661646	-0.126841742	0.071539556	0.073879108	-0.014597784	0.172299174	5.697083347	-0.138423668	0.836488809	0.165492951	0.055722575	172	185	0.319148685	0.051497586	0.999864657	0.694773566	0.112108128	0.853872984	0.16135923	1.228994632	NO
153	3271	191	1182	A	OFF.TARGET	TUP1_T2098del	1	94	Y94	TUP1	NAN	YES	x	D08	8	D	3	1	2	2	11	18786	14827	6846	4136	-0.837072289	54	5.085202138	5.678443258	0.147981037	5.414237738	0.194871399	0.950749383	0.01941611	0.020283178	0.698701874	0.044386727	0.044357611	0.949515766	0.01839289	0.01918166	5.678318593	0.147635768	1.046318433	0.078353355	0.081680573	0.045277748	0.074945011	0.077648841	0.345964953	0.149451335	5.704940608	0.222139069	0.982665358	0.142645112	0.068880926	172	185	0.465325234	0.064655937	1.001243643	1.012993903	0.140753317	1.072049435	0.138947842	1.058298014	NO
33	2058	191	1182	A	EMS.MUTANT	2P06D08	1	2058	2P06D08	NAN	NAN	NAN	x	D09	9	D	3	1	2	2	11	18256	15194	8154	4394	-0.817455885	55	5.070584343	5.681494945	0.141247503	5.492547374	0.176706337	0.963297949	0.018506276	0.019924893	0.749672411	0.037600234	0.037582529	0.961646731	0.018517834	0.019200818	5.68138264	0.141180348	1.100703995	0.08716379	0.089258399	0.09594997	0.079037965	0.081004309	0.440829144	0.148535793	5.708004655	0.31700326	1.030716832	0.14172957	0.075249141	172	185	0.513376709	0.071024153	1.001781398	1.117599988	0.15461666	1.177639763	0.138347049	1.053722061	NO
CTRL	1617	191	1182	A	WT	WT	1	NAN	NAN	NAN	NAN	NAN	x	D10	10	D	3	1	2	2	11	18914	15284	6114	5019	-0.273342656	54	5.062496495	5.668327199	0.118573969	5.387099606	0.165865844	0.947906251	0.018260306	0.017937891	0.719536302	0.040288773	0.040266996	0.946562026	0.01781129	0.017276734	5.668498278	0.11853206	1.033839079	0.074531653	0.07248661	0.033279135	0.072001509	0.069575005	0.322866698	0.135728251	5.695120293	0.199040814	0.971639429	0.128922028	0.060832794	172	185	0.454299305	0.056607806	0.999520132	0.988990909	0.123232866	0.938604692	0.124604649	0.949052901	NO
96	3103	191	1182	A	RAP1.MUTANT	P589.SYN	1	NAN	NAN	RAP1	NAN	NAN	x	D11	11	D	3	1	2	2	11	18832	15402	6243	5314	-0.165214915	54	5.066306467	5.669451228	0.122750314	5.384770834	0.172702475	0.947316292	0.017638016	0.01765514	0.740675164	0.036448171	0.036432044	0.946411909	0.017046632	0.01708877	5.669710474	0.122994645	1.033212509	0.071264631	0.071974994	0.032672889	0.068855806	0.068942776	0.321692782	0.134928573	5.696332489	0.197866898	0.971085833	0.12812235	0.060384532	182	185	0.453745709	0.056159544	0.99977678	0.992223299	0.122806247	0.953166313	0.12376876	0.960636899	NO
124	3215	191	1182	A	SINGLE.SITE	RPF1_G127A	1	2154	2P16H09	RPF1	B	NO	x	D12	12	D	3	1	2	2	11	18969	15039	6112	4656	-0.576985374	55	5.081240222	5.688043656	0.140990554	5.400897882	0.192224032	0.947735751	0.019589688	0.019766277	0.707646203	0.042209512	0.042184472	0.946847012	0.01826458	0.018927094	5.688014258	0.141022955	1.0350306	0.076641269	0.079943875	0.034430991	0.074036595	0.076345168	0.325095286	0.14935845	5.714636273	0.201269402	0.972692177	0.142552228	0.067414374	172	185	0.455352054	0.063189386	1.002945278	0.991282699	0.137560695	1.047732788	0.138770398	1.056946508	NO
CTRL	1617	191	1182	A	WT	WT	1	NAN	NAN	NAN	NAN	NAN	x	E01	1	E	3	1	2	2	12	19915	15259	6680	4274	-0.83532134	55	5.085876279	5.696470404	0.168838253	5.42575669	0.230690857	0.950806834	0.02139678	0.021179518	0.670957189	0.04912685	0.049087385	0.949272006	0.019500663	0.019831524	5.696786023	0.168832372	1.045277628	0.083422324	0.085336552	0.044282517	0.079622097	0.080662611	0.344058773	0.156438612	5.7181536	0.223620329	0.983381163	0.146142586	0.070674407	172	185	0.46604104	0.066449418	1.003562585	1.014552182	0.144657652	1.101786851	0.142582762	1.085983422	NO
67	2799	191	1182	A	SINGLE.SITE	CCC2_G2108A	2	135	Y135	CCC2	NAN	YES	x	E02	2	E	3	1	2	2	12	19721	16015	6480	4985	-0.410469835	53	5.038840293	5.632148418	0.118237871	5.295910002	0.193852577	0.93911381	0.020459926	0.0207672	0.631382095	0.054638424	0.05458415	0.938242246	0.019395876	0.01961035	5.632727249	0.118529833	1.000199144	0.076311724	0.076736729	0.000199124	0.076235497	0.076161927	0.257805991	0.153345576	5.654094827	0.137367547	0.94341766	0.143049551	0.063461857	172	185	0.426077536	0.059236869	0.992319972	0.927553278	0.128956227	0.982196749	0.139028377	1.05891141	NO
22	1587	191	1182	A	EMS.MUTANT	1P09E01	1	1587	1P09E01	NAN	NAN	NAN	x	E03	3	E	3	1	2	2	12	12342	8782	2519	2336	-0.592613672	58	5.176218681	5.750297366	0.077074965	5.709150765	0.110790913	0.993084989	0.009175186	0.009423608	0.675211348	0.055279514	0.055223308	0.992953691	0.008368516	0.008572409	5.750108507	0.077440827	1.267394924	0.049805735	0.051096947	0.236963552	0.039513118	0.040435257	0.685649674	0.066566048	5.771476085	0.565211231	1.180295177	0.056270023	0.038292482	172	185	0.662955054	0.034067494	1.012920929	1.443225895	0.074163533	0.564867494	0.051387335	0.391392294	NO
166	R458	191	1182	A	RAP1.MUTANT	PLATE	1	NAN	NAN	RAP1	NAN	NAN	x	E04	4	E	3	1	2	2	12	20846	17059	6632	5542	-0.42076464	53	5.036440981	5.633269946	0.101730852	5.441078985	0.133869875	0.963930867	0.015278554	0.016394802	0.857341772	0.018921354	0.018919096	0.963660015	0.015235211	0.016278227	5.633396654	0.101742528	1.110239708	0.073316962	0.076697219	0.104575945	0.065593083	0.069212823	0.456573031	0.125638909	5.654764232	0.336134588	1.040972103	0.115342884	0.062422407	182	185	0.52363198	0.058197419	0.992481037	1.14504631	0.127262547	0.987754089	0.111141834	0.862632437	NO
CTRL	1617	191	1182	A	WT	WT	1	NAN	NAN	NAN	NAN	NAN	x	E05	5	E	3	1	2	2	12	17703	14649	5989	4989	-0.239296772	54	5.064524139	5.670649337	0.120732463	5.39327153	0.176833841	0.948429226	0.018222022	0.018211908	0.707621506	0.042465634	0.042440135	0.947179362	0.017289862	0.017476805	5.670822049	0.121291908	1.03642351	0.0723833	0.074249646	0.035775854	0.069729141	0.070783022	0.327694268	0.138359908	5.692189626	0.207255825	0.975531707	0.128063883	0.060926332	172	185	0.458191584	0.056701344	0.999005787	0.997464239	0.123436494	0.940155634	0.123750296	0.942545705	NO
112	3192	191	1182	A	SINGLE.SITE	ATP23_G476A	2	2204	2P03B06	ATP23	D	YES	x	E06	6	E	3	1	2	2	12	18038	15259	6493	5435	0.555102156	52	5.005440932	5.583797076	0.08792735	5.187895631	0.129442831	0.928875598	0.014389569	0.015152339	0.685320135	0.043618251	0.043590621	0.928447654	0.013808483	0.01469159	5.583594	0.087849134	0.963301438	0.049776915	0.053577789	-0.037388896	0.051902961	0.05521197	0.181212247	0.115589132	5.604961577	0.060773803	0.910706676	0.105293106	0.043267517	172	185	0.393366552	0.039042529	0.983696858	0.856342811	0.08499398	0.64735773	0.099252284	0.755956285	NO
69	2801	191	1182	A	SINGLE.SITE	NAM7_G1304A	2	1575	1P04G01	NAM7	NAN	YES	x	E07	7	E	3	1	2	2	12	16765	13369	5340	4797	-0.239448148	55	5.092281234	5.692868942	0.108961951	5.494228362	0.141643138	0.962641007	0.016370618	0.016697203	0.841819808	0.021223253	0.021220068	0.962061095	0.016707444	0.016541069	5.692984259	0.10900617	1.102654335	0.079320511	0.077880093	0.097720305	0.07144938	0.070330588	0.444069469	0.12918177	5.714351837	0.323631025	1.03424743	0.118885745	0.0635403	172	185	0.516907306	0.059315311	1.002895358	1.125285953	0.129126994	0.983497397	0.114750383	0.873997755	NO
56	2526	191	1182	A	SINGLE.SITE	PRE7_G83A	2	1496	1P09F07	PRE7	NAN	YES	x	E08	8	E	3	1	2	2	12	17662	14427	5938	4754	-0.230368577	54	5.06504652	5.661134694	0.135575026	5.311261019	0.167537768	0.936045783	0.016144598	0.016667363	0.793452126	0.025188176	0.025182851	0.935097134	0.01591116	0.016331104	5.661125563	0.135274258	0.988041615	0.060888816	0.06298589	-0.012030462	0.061594377	0.063103308	0.233211205	0.129000864	5.68249314	0.112772762	0.932639625	0.118704839	0.051382274	172	185	0.415299502	0.047157285	0.997304008	0.90408994	0.102659472	0.781907174	0.113550065	0.864855519	NO
CTRL	1617	191	1182	A	WT	WT	1	NAN	NAN	NAN	NAN	NAN	x	E09	9	E	3	1	2	2	12	18626	15081	5900	5050	-0.189032745	54	5.067182143	5.6691741	0.118501059	5.390775306	0.170475046	0.948117152	0.018192502	0.018230163	0.715357687	0.041057032	0.041033986	0.94696781	0.017714922	0.017569771	5.669354506	0.118530743	1.035536458	0.073314264	0.074504205	0.034919609	0.071097839	0.071092696	0.326039931	0.139064132	5.690722084	0.205601487	0.974745307	0.128768107	0.061160103	172	185	0.457405184	0.056935115	0.998748226	0.995752279	0.123945404	0.944031753	0.124474136	0.948058843	NO
12	1487	191	1182	A	EMS.MUTANT	1P07H05	1	1487	1P07H05	NAN	NAN	NAN	x	E10	10	E	3	1	2	2	12	18315	15178	6077	5342	-0.034090892	54	5.067610909	5.670587215	0.109738779	5.440813871	0.159103502	0.956947118	0.016959577	0.017399229	0.713963437	0.042849827	0.04282363	0.955519491	0.016520051	0.016726657	5.670605756	0.109566828	1.072589728	0.074220586	0.075060804	0.070076031	0.06920531	0.069554047	0.392914104	0.131040178	5.691973333	0.27247566	1.007594204	0.120744152	0.061315333	172	185	0.490254081	0.057090345	0.998967826	1.067262977	0.124283333	0.946605589	0.116450524	0.886946899	NO
94	3097	191	1182	A	RAP1.MUTANT	G590.SYN	1	NAN	NAN	RAP1	NAN	NAN	x	E11	11	E	3	1	2	2	12	18911	14932	6520	4361	-0.752385063	54	5.079535321	5.688894794	0.152614225	5.419593961	0.206104515	0.950660531	0.019421027	0.019696304	0.68576078	0.046564361	0.046530751	0.949150608	0.018284822	0.018541974	5.688789093	0.152425611	1.044760006	0.078055914	0.079011078	0.0437872	0.074292946	0.075154983	0.343109419	0.144980351	5.71015667	0.222670976	0.982922275	0.134684326	0.065071399	182	185	0.465582151	0.06084641	1.002203095	1.018106504	0.1330552	1.032714027	0.130688881	1.014347736	NO
7	126	190	1180	A	EMS.MUTANT	Y126	1	126	Y126	NAN	NAN	NAN	a	E12	12	E	3	1	2	2	12	11942	10464	4353	3854	0.549104527	52	5.029807966	5.600162873	0.089122272	5.079226482	0.16649906	0.906933854	0.019159475	0.022070378	0.363315911	0.09707181	0.096768621	0.906974364	0.018228754	0.020478881	5.600217467	0.09077747	0.891650842	0.056067021	0.060860131	-0.114680656	0.062388474	0.068615839	0.013291053	0.155307469	5.621585044	-0.10714739	0.847186154	0.145011443	0.050377553	170	171	0.331046828	0.046281646	0.996155892	0.881581191	0.123248512	0.78565003	0.139803926	0.89118284	NO
107	3184	191	1182	A	SINGLE.SITE	EXG2_C379T	2	2140	2P15D07	EXG2	A	NO	x	F02	2	F	3	1	2	2	12	18568	14314	6281	3680	-0.871837113	54	5.07575019	5.675806721	0.156998575	5.397203687	0.227699081	0.949256206	0.020894749	0.021206037	0.653691353	0.05207451	0.052027515	0.947619404	0.018920522	0.019776644	5.675572723	0.157346873	1.038273344	0.079222232	0.083353066	0.037559087	0.076690922	0.079613185	0.3311354	0.154790033	5.698024518	0.2082771	0.976017826	0.144811244	0.068964277	172	185	0.458677703	0.064739289	1.000029837	0.998522501	0.14093477	1.073431471	0.141143309	1.075019812	NO
CTRL	1617	191	1182	A	WT	WT	1	NAN	NAN	NAN	NAN	NAN	x	F03	3	F	3	1	2	2	12	18833	15020	5959	4851	-0.38463953	55	5.070635615	5.677076534	0.13234637	5.405819164	0.190459806	0.949244265	0.019155178	0.019506469	0.673257155	0.048614302	0.048576058	0.947790842	0.01783998	0.01847538	5.677485316	0.131935931	1.038995753	0.075144595	0.078142764	0.038254625	0.072211118	0.074592507	0.332476044	0.144919874	5.699937111	0.209617744	0.976656717	0.134941085	0.064349968	172	185	0.459316594	0.06012498	1.000365506	0.99991334	0.130889609	0.996922374	0.130900953	0.997008775	NO
146	3257	191	1182	A	SINGLE.SITE	MRN1_G1664A	2	2175	2P18H11	MRN1	NAN	YES	x	F04	4	F	3	1	2	2	12	17850	14698	5949	4916	-0.304386565	54	5.057266802	5.676306228	0.132797959	5.321900695	0.172706964	0.934864855	0.017548406	0.017841219	0.706900227	0.040160735	0.040139164	0.93393517	0.017096785	0.017070184	5.676514711	0.132361866	0.983625111	0.064599873	0.065258016	-0.016510439	0.065562273	0.065658159	0.224124644	0.13487438	5.698966506	0.101266345	0.927687532	0.12489559	0.053443492	172	185	0.410347408	0.049218504	1.000195161	0.893309437	0.107146659	0.816083896	0.119943499	0.913551186	NO
171	880	171	880	A	NULL	NULL	1	NAN	NAN	NAN	NAN	NAN	a	F05	5	F	3	1	2	2	12	18700	15518	4887	4710	0.51659388	52	5.034991186	5.620576374	0.065069571	2.889301703	0.193505089	0.514724193	0.03257458	0.033758263	0.013332862	0.089206391	0.088970886	0.513935797	0.031767311	0.033420993	5.619897776	0.065525041	0.517908473	0.004521301	0.004560687	-0.657956746	0.008735432	0.008794096	-3.060271847	0.251606095	5.642349571	-3.183130146	0.515812873	0.241627306	0.003873455	170	171	-0.000326453	-0.000222452	0.999835407	-0.000869349	-0.000592392	-0.003776211	0.681419743	4.34372338	NO
147	3259	191	1182	A	SINGLE.SITE	FTR1_G265A	1	2100	2P11C10	FTR1	NAN	YES	x	F06	6	F	3	1	2	2	12	18069	14624	5565	4960	0.05952048	54	5.052175796	5.656079507	0.116547674	5.303247908	0.174023521	0.935508455	0.018883186	0.018733759	0.698216711	0.041953396	0.041928808	0.934507048	0.018156622	0.018077037	5.65606607	0.116037463	0.985793745	0.068754164	0.069595951	-0.014308129	0.069977063	0.069720061	0.228596734	0.143198135	5.678517865	0.105738434	0.929605448	0.133219346	0.057260775	172	185	0.412265325	0.053035787	0.996606329	0.897484662	0.115456728	0.879377638	0.128644792	0.979824699	NO
CTRL	1617	191	1182	A	WT	WT	1	NAN	NAN	NAN	NAN	NAN	x	F07	7	F	3	1	2	2	12	17936	14559	5395	4747	-0.073764438	54	5.063053746	5.665997264	0.101401257	5.385069776	0.158825129	0.947253191	0.018609119	0.018328544	0.740012694	0.036576173	0.036559875	0.946738871	0.0180843	0.017932998	5.665938452	0.101282397	1.034578152	0.074537912	0.075771436	0.033993761	0.072752261	0.072423359	0.324249626	0.141682882	5.688390247	0.201391326	0.97274984	0.131704093	0.062291777	172	185	0.455409716	0.058066789	0.998338978	0.991408228	0.126409012	0.962795851	0.127504502	0.971139662	NO
118	3203	191	1182	A	SINGLE.SITE	TRA1_G8560A	1	2013	2P01D04	TRA1	NAN	YES	x	F08	8	F	3	1	2	2	12	20438	17101	6613	5641	0.100166857	53	5.030382071	5.623085882	0.090438151	5.361465292	0.13466051	0.951787455	0.013784258	0.014428138	0.741077933	0.037472222	0.037454698	0.951371014	0.013435328	0.013945475	5.623284027	0.090590362	1.054305403	0.058320095	0.060584472	0.052882165	0.055303178	0.057194699	0.360472999	0.109255067	5.645735822	0.237614699	0.990196403	0.099276277	0.048686499	172	185	0.472856279	0.04446151	0.990852928	1.029388679	0.09679088	0.737208974	0.094027535	0.716161921	NO
75	2911	191	1182	A	SINGLE.SITE	ADE4_G856A	2	1595	1P11B11	ADE4	NAN	YES	x	F09	9	F	3	1	2	2	12	20031	16117	7685	7181	0.001082655	51	5.031359259	5.596578404	0.106881726	5.403563173	0.160633555	0.964289734	0.013772673	0.013815191	0.483782637	0.085857297	0.085647261	0.965522792	0.010141577	0.010862831	5.596881187	0.107191032	1.119197276	0.048902232	0.052053366	0.112611711	0.043900685	0.046679938	0.471139949	0.08403632	5.619332982	0.34828165	1.047586059	0.074057531	0.040569003	172	185	0.530245936	0.036344014	0.986219106	1.154323602	0.079119425	0.602614111	0.068541807	0.522049545	NO
29	2021	191	1182	A	EMS.MUTANT	2P02B11	1	2021	2P02B11	NAN	NAN	NAN	x	F10	10	F	3	1	2	2	12	19502	14849	5394	5247	0.294919162	55	5.13043986	5.703731469	0.092273959	5.528813897	0.136871993	0.968475664	0.013058048	0.012865783	0.632694337	0.058870466	0.058802597	0.9681718	0.011942158	0.011797654	5.703980467	0.09251793	1.132162442	0.058779152	0.05861239	0.124129469	0.052132824	0.051512047	0.491855203	0.092685356	5.726432262	0.368996903	1.059052309	0.082706567	0.046255313	172	185	0.541712185	0.042030324	1.005015529	1.179285155	0.091498288	0.696897875	0.077587925	0.590949417	NO
CTRL	1617	191	1182	A	WT	WT	1	NAN	NAN	NAN	NAN	NAN	x	F11	11	F	3	1	2	2	12	19333	15036	5925	4552	-0.643390068	55	5.0787251	5.692409314	0.160715476	5.420895966	0.226170715	0.949977185	0.021103296	0.020643771	0.652088454	0.05233087	0.052283179	0.948428329	0.018841102	0.019201869	5.69262927	0.160570797	1.041690525	0.080014216	0.082301358	0.040844898	0.076723876	0.078007527	0.337461193	0.151873204	5.715081065	0.214602893	0.979039943	0.141894415	0.068004001	172	185	0.46169982	0.063779012	1.003023341	1.005101525	0.138844288	1.057509288	0.138139565	1.052141761	NO
71	2803	191	1182	A	DOUBLE.MUTANT	CHD1_G1277A_G2723A	1	54	Y54	CHD1	NAN	YES	x	F12	12	F	3	1	2	2	12	18395	14527	5977	4176	-0.755330603	55	5.068076301	5.701760051	0.173770575	5.457936337	0.214998722	0.955883371	0.018666089	0.019253492	0.721055926	0.04118508	0.041161818	0.954662541	0.017202055	0.018148933	5.701440589	0.173307442	1.068763977	0.076596634	0.081166536	0.066502818	0.071868059	0.075256947	0.386212754	0.142652253	5.723892384	0.263354454	1.002983406	0.132673464	0.066761451	172	185	0.485643283	0.062536462	1.004569768	1.057225459	0.136139307	1.036906765	0.128770363	0.980781115	NO
14	1509	191	1182	A	EMS.MUTANT	1P12D09	1	1509	1P12D09	NAN	NAN	NAN	x	G01	1	G	3	1	2	2	12	20517	15848	6177	4490	-0.815402102	55	5.107157333	5.727015964	0.173796817	5.497094099	0.214173193	0.958065533	0.020451333	0.020313263	0.74346152	0.037472222	0.037454698	0.957589973	0.019171687	0.019527064	5.726742087	0.17317581	1.081939646	0.087898973	0.08888638	0.078755399	0.081026207	0.081582814	0.409105282	0.152684427	5.743650545	0.282697435	1.012811564	0.14212341	0.072913486	172	185	0.495471441	0.068688498	1.008037418	1.078620955	0.149532036	1.138912658	0.138632608	1.055897025	NO
172	1617	172	1617	A	WT	WT	1	NAN	NAN	NAN	NAN	NAN	x	G02	2	G	3	1	2	2	12	18770	14648	5571	4750	-0.309911603	55	5.069522802	5.678514282	0.133774533	5.411783798	0.189300639	0.949930805	0.019270352	0.019185831	0.697152816	0.044514811	0.044485443	0.948537035	0.018060411	0.018304146	5.678696098	0.133439041	1.042151387	0.07631294	0.078323846	0.041287218	0.073578025	0.074358404	0.338311275	0.144410567	5.695604557	0.211903427	0.977747948	0.13384955	0.063975504	172	185	0.460407824	0.059750515	0.999605123	1.002288904	0.130074415	0.990713441	0.129777367	0.988450971	NO
CTRL	1617	191	1182	A	WT	WT	1	NAN	NAN	NAN	NAN	NAN	x	G04	4	G	3	1	2	2	12	18554	14401	6257	4073	-0.775704661	55	5.076211105	5.693115517	0.15579963	5.417730698	0.200359013	0.949468436	0.019517253	0.019705714	0.693852829	0.044899073	0.044868938	0.948107048	0.018265941	0.018610238	5.692954519	0.15544719	1.040330732	0.07686028	0.079007198	0.039538675	0.073902936	0.075269919	0.334948773	0.146161148	5.709862978	0.208540926	0.976143486	0.13560013	0.064594656	172	185	0.458803363	0.060369668	1.002107542	0.998796057	0.131422284	1.000979504	0.1315807	1.002186078	NO
26	1611	191	1182	A	EMS.MUTANT	1P15H09	1	1611	1P15H09	NAN	NAN	NAN	x	G05	5	G	3	1	2	2	12	13358	9614	2719	2607	-0.478031479	57	5.130011413	5.718496706	0.064820701	5.611580998	0.090111338	0.981035592	0.009934677	0.010004758	0.83699709	0.025188176	0.025182851	0.980934702	0.009812213	0.009895439	5.718530465	0.064797386	1.198534838	0.053719801	0.054218056	0.181099843	0.044743552	0.045084035	0.591661138	0.077592629	5.735438923	0.46525329	1.115561702	0.067031612	0.041276694	172	185	0.598221578	0.037051706	1.00659624	1.30230378	0.08066004	0.614348226	0.061936425	0.47173957	NO
3	94	190	1180	A	EMS.MUTANT	Y94	1	94	Y94	NAN	NAN	NAN	a	G06	6	G	3	1	2	2	12	21453	17247	8486	8014	1.127304658	52	5.035633012	5.610066328	0.077675462	5.264155255	0.167489346	0.937183992	0.021694309	0.020660753	0.289617822	0.115429325	0.114920727	0.937325619	0.01951372	0.018727149	5.610734763	0.078430819	0.996624966	0.075459092	0.073164705	-0.003380742	0.075920594	0.072742405	0.250637963	0.147259267	5.627643221	0.124230116	0.937627546	0.13669825	0.059852696	170	171	0.42148822	0.05575679	0.997229413	1.122427571	0.148480918	0.946494496	0.132285523	0.843256635	NO
41	2157	191	1182	A	EMS.MUTANT	2P17B12	1	2157	2P17B12	NAN	NAN	NAN	x	G07	7	G	3	1	2	2	12	13693	11091	4598	3336	0.070124492	53	5.054979671	5.636601711	0.099406456	5.324145557	0.162630093	0.944099933	0.016036489	0.016779815	0.702572524	0.042849827	0.04282363	0.943868014	0.015222537	0.016190239	5.636533891	0.099765059	1.022705692	0.061694046	0.066815524	0.022451755	0.060431503	0.06468083	0.301799518	0.127773032	5.65344235	0.17539167	0.960611325	0.117212015	0.054014713	172	185	0.443271202	0.049789725	0.992205459	0.964983181	0.108390184	0.825555219	0.112323392	0.855512546	NO
CTRL	1617	191	1182	A	WT	WT	1	NAN	NAN	NAN	NAN	NAN	x	G08	8	G	3	1	2	2	12	18699	14364	6439	3896	-0.828850772	55	5.080208115	5.684426118	0.151318986	5.412292495	0.207071386	0.95036595	0.02011503	0.019713575	0.699509028	0.044130562	0.044101948	0.949210685	0.018270819	0.018660378	5.684511712	0.151334766	1.045016098	0.077006721	0.079678489	0.04403229	0.074182159	0.075677408	0.343579221	0.146136339	5.701420171	0.217171374	0.98027249	0.135575322	0.065142629	172	185	0.462932366	0.060917641	1.00062579	1.007784728	0.132615199	1.010065353	0.1315908	1.002263008	NO
46	2217	191	1182	A	EMS.MUTANT	2P09C10	1	2217	2P09C10	NAN	NAN	NAN	x	G09	9	G	3	1	2	2	12	20367	16433	8810	6994	-0.517567577	49	4.924330759	5.491431035	0.148196699	5.278444911	0.181075462	0.961451329	0.012051562	0.012981217	0.80838025	0.027874534	0.027867318	0.9613995	0.011279511	0.012321914	5.491363851	0.148478678	1.099543326	0.052888024	0.0580433	0.094894935	0.048211335	0.052491246	0.438895796	0.096777358	5.508272309	0.312487949	1.028324901	0.086216341	0.04556902	172	185	0.510984778	0.041344032	0.966727441	1.112392853	0.090004257	0.685518571	0.080910496	0.616255822	NO
101	3162	191	1182	A	SINGLE.SITE	FTR1_G853A	2	2200	2P01A08	FTR1	NAN	YES	x	G10	10	G	3	1	2	2	12	19304	15437	5715	5013	-0.288992493	54	5.07869478	5.670137266	0.111981905	5.403844314	0.174335963	0.951232961	0.019580058	0.019317443	0.716255781	0.04144118	0.041417481	0.950072182	0.019416215	0.018726763	5.670339665	0.111887092	1.048701689	0.082928313	0.08051499	0.047552912	0.079398656	0.076247609	0.350316128	0.146679045	5.687248124	0.223908281	0.983520436	0.136118028	0.065845499	172	185	0.466180313	0.06162051	0.99813853	1.014855374	0.134145317	1.021719516	0.132181708	1.006763665	NO
193	1209	190	1180	A	m66	CIS	1	NAN	NAN	NAN	NAN	NAN	a	G11	11	G	3	1	2	2	12	18711	15110	6002	5219	-0.316470034	55	5.078406273	5.689330174	0.133137035	5.446624142	0.185040797	0.954129014	0.019496652	0.019625625	0.714713731	0.042081454	0.04205664	0.952975585	0.019127906	0.018884578	5.689376017	0.133279742	1.061307261	0.084007853	0.082816321	0.059501413	0.079242026	0.077592077	0.373020752	0.147484632	5.706284476	0.246612904	0.994629164	0.136923615	0.067756239	172	185	0.477289041	0.06353125	1.001479498	1.039038618	0.13830492	1.053401184	0.133108546	1.013822937	NO
CTRL	1617	191	1182	A	WT	WT	1	NAN	NAN	NAN	NAN	NAN	x	G12	12	G	3	1	2	2	12	19809	15000	6304	3639	-0.989765922	54	5.095684426	5.679594132	0.180004471	5.405416374	0.247071483	0.949508199	0.021191826	0.021168461	0.669032044	0.049383133	0.049343049	0.948406747	0.018944461	0.019599268	5.680346765	0.180669291	1.041599075	0.080096007	0.082977513	0.040757104	0.076866638	0.079111252	0.337292424	0.153146779	5.697255223	0.210884576	0.97726122	0.142585762	0.068081714	172	185	0.459921096	0.063856725	0.999894822	1.001229317	0.139013465	1.058797831	0.138842783	1.057497831	NO
CTRL	1617	191	1182	A	WT	WT	1	NAN	NAN	NAN	NAN	NAN	x	H02	2	H	3	1	2	2	12	19298	15047	6759	4283	-0.837171333	55	5.086554547	5.693595938	0.164737277	5.427318916	0.223187383	0.951134703	0.020518602	0.020260329	0.664859688	0.050280178	0.050237871	0.949711139	0.017997439	0.018770403	5.694010235	0.164749912	1.047154081	0.076266382	0.081029953	0.046076086	0.073044646	0.07652535	0.347492775	0.148034548	5.707872037	0.22146716	0.982341013	0.135236358	0.0652595	172	185	0.46500089	0.061034511	1.001758123	1.012287819	0.132869622	1.01200317	0.131256763	0.999718807	NO
191	1182	191	1182	A	GFP.MATALPHA	GFP.MATALPHA	1	NAN	NAN	NAN	NAN	NAN	x	H03	3	H	3	1	2	2	12	19375	14801	6636	4268	-0.781275303	55	5.08314762	5.694305474	0.154369352	5.188945347	0.23159362	0.908985938	0.02353667	0.024396056	0.521138156	0.068111517	0.068006482	0.90689425	0.02135787	0.022417076	5.694675846	0.155117127	0.891405416	0.065710541	0.068021774	-0.114955943	0.073482846	0.075895848	0.012664561	0.173691871	5.708537648	-0.113361055	0.845034195	0.160893682	0.055548869	172	185	0.327694071	0.05132388	1.001874941	0.71337652	0.111729977	0.850992795	0.156621327	1.192908333	NO
74	2910	191	1182	A	SINGLE.SITE	ADE4_G856A	1	1595	1P11B11	ADE4	NAN	YES	x	H04	4	H	3	1	2	2	12	19733	15800	7432	7152	0.344707934	51	5.02653744	5.601033845	0.095518176	5.406626179	0.142533977	0.964442442	0.012451681	0.012599271	0.503742192	0.082252717	0.082067972	0.965290066	0.009837581	0.010245982	5.601152135	0.096007877	1.118071015	0.047579929	0.049294779	0.111604893	0.042500533	0.044121376	0.46932003	0.079727752	5.615013937	0.343294414	1.044860834	0.066929563	0.036481876	172	185	0.52752071	0.032256888	0.985461094	1.148390897	0.070221918	0.534846136	0.061148097	0.465735263	NO
9	135	190	1180	A	EMS.MUTANT	Y135	1	135	Y135	NAN	NAN	NAN	a	H05	5	H	3	1	2	2	12	19856	16313	6689	5919	0.318165585	51	5.012085376	5.581908717	0.087358173	5.017546673	0.227015422	0.89866916	0.031561812	0.030822113	-0.039774821	0.168122416	0.166564747	0.898339328	0.026519725	0.027697094	5.58141126	0.089776332	0.866063153	0.075842877	0.080447553	-0.143797448	0.087279373	0.090972666	-0.054234957	0.219633444	5.595273062	-0.180260573	0.822692652	0.206835255	0.066789271	170	171	0.306553326	0.062693365	0.991493357	0.816354738	0.166953091	1.064245717	0.204510469	1.303655958	NO
CTRL	1617	191	1182	A	WT	WT	1	NAN	NAN	NAN	NAN	NAN	x	H06	6	H	3	1	2	2	12	19247	15639	6220	5061	-0.366016979	55	5.072703279	5.684147597	0.135085918	5.41431138	0.191320393	0.949703544	0.01933047	0.019337465	0.700314956	0.043874404	0.043846284	0.948532656	0.018305344	0.018472663	5.684468582	0.135213748	1.042132813	0.07811149	0.079183577	0.041269395	0.07459412	0.075089628	0.338277028	0.146000708	5.698330384	0.212251413	0.977914302	0.133202518	0.063688403	172	185	0.460574178	0.059463415	1.000083518	1.00265105	0.129449409	0.985953077	0.12910714	0.983346177	NO
133	3234	191	1182	A	SINGLE.SITE	ADE5_G1592A	1	1572	1P03E05	ADE5	NAN	YES	x	H07	7	H	3	1	2	2	12	13500	9362	3806	1968	-1.104418276	58	5.148838918	5.74189541	0.085014669	5.675520336	0.104612453	0.986822712	0.009417549	0.009992262	1.039671948	-0.009204145	-0.009203885	0.986893638	0.009788503	0.009941347	5.741980565	0.085114261	1.231866525	0.055690893	0.05601846	0.208530519	0.045216321	0.045813819	0.638260041	0.076519134	5.755842367	0.512234426	1.145182075	0.063720944	0.041125491	172	185	0.627841951	0.036900502	1.010177139	1.366786114	0.080330877	0.611841147	0.058773553	0.447649519	NO
91	3089	191	1182	A	SINGLE.SITE	RIM8_C436T	2	1480	1P06B05	RIM8	NAN	YES	x	H08	8	H	3	1	2	2	12	18828	15540	6677	5314	-0.40567618	54	5.051788391	5.663102769	0.148880374	5.374456884	0.20834932	0.946076483	0.020880919	0.0202443	0.71791702	0.040288773	0.040266996	0.945083173	0.019676088	0.019426008	5.663600502	0.148777569	1.027698482	0.081081143	0.081403553	0.027321819	0.078912385	0.078058136	0.311302064	0.154197837	5.677462304	0.185276449	0.965189108	0.141399648	0.065808376	172	185	0.447848984	0.061583388	0.996421073	0.974948825	0.134064503	1.021103999	0.137509272	1.047341125	NO
172	1617	191	1182	A	WT	WT	1	NAN	NAN	NAN	NAN	NAN	x	H09	9	H	3	1	2	2	12	18845	14880	5620	4755	-0.30192233	55	5.081411493	5.696025955	0.13948781	5.436283533	0.185749971	0.951453606	0.019067951	0.018989523	0.72123839	0.040416813	0.040394827	0.950275453	0.018257743	0.018258543	5.695853907	0.13924758	1.049574934	0.078241698	0.079078722	0.048385258	0.07470504	0.074595781	0.351905708	0.143833692	5.709715709	0.225880093	0.984475218	0.131035502	0.063511997	172	185	0.467135095	0.059287008	1.002081696	1.016933896	0.129065379	0.983028104	0.126916193	0.966658805	NO
CTRL	1617	191	1182	A	WT	WT	1	NAN	NAN	NAN	NAN	NAN	x	H10	10	H	3	1	2	2	12	19049	15367	5693	4855	-0.167114002	54	5.061247379	5.670824527	0.125847053	5.398639528	0.184344226	0.949042722	0.01888266	0.019018645	0.701691273	0.043618251	0.043590621	0.947926927	0.017796537	0.018250349	5.670897553	0.126091609	1.039569881	0.074572118	0.078190439	0.038807052	0.072063957	0.074155848	0.333540228	0.144854056	5.684759355	0.207514612	0.975654841	0.132055867	0.062841777	172	185	0.458314718	0.058616789	0.997701739	0.997732297	0.127606339	0.971915312	0.12789637	0.974124337	NO
77	2916	191	1182	A	SINGLE.SITE	ADE6_G1361A	1	2038	2P04A04	ADE6	NAN	YES	x	H11	11	H	3	1	2	2	12	14420	9627	2395	2134	-0.860697389	58	5.173847044	5.741985494	0.090315233	5.723467979	0.11913722	0.996011046	0.010073886	0.010243627	0.689639489	0.05335638	0.053305832	0.995666763	0.00889443	0.009256071	5.7418471	0.090480713	1.283854763	0.0546479	0.056463615	0.249867085	0.042397159	0.044046146	0.706865905	0.072013249	5.755708902	0.58084029	1.191014503	0.05921506	0.040931364	172	185	0.67367438	0.036706375	1.010153715	1.466561427	0.07990827	0.608622354	0.054486821	0.414999565	NO
103	3175	191	1182	A	RAP1.MUTANT	F548	1	NAN	NAN	RAP1	NAN	NAN	x	H12	12	H	3	1	2	2	12	19619	14868	5109	4248	-0.680733666	52	5.043138115	5.614097463	0.100939828	5.43673019	0.148706972	0.966739736	0.017841521	0.018234714	0.807376477	0.028386265	0.028378645	0.966579634	0.018038246	0.018000034	5.614123026	0.101154257	1.12433765	0.087928122	0.085879755	0.117194107	0.078442171	0.076932571	0.479404459	0.137505408	5.627984828	0.353378844	1.050385451	0.124707218	0.068664203	182	185	0.533045327	0.064439214	0.987780921	1.165630841	0.140911723	1.093692794	0.120888808	0.938284022	NO
CTRL	1617	191	1182	A	WT	WT	1	NAN	NAN	NAN	NAN	NAN	x	A01	1	A	1	2	1	3	13	21613	16150	5965	3730	-0.895760249	57	5.325427487	5.892380419	0.179863578	5.364907289	0.253373463	0.910264411	0.020608514	0.02055622	0.613239334	0.050408333	0.050365703	0.910971539	0.018186312	0.018768372	5.892594049	0.180412212	0.90409329	0.057341203	0.059307726	-0.100822727	0.063670024	0.065171454	0.044548971	0.146688339	5.670330725	0.202193813	0.973129542	0.133408258	0.063148448	172	185	0.455789419	0.058923459	0.995169448	0.992234825	0.128273948	0.977000161	0.129277813	0.984646111	NO
172	1617	172	1617	A	WT	WT	1	NAN	NAN	NAN	NAN	NAN	x	A02	2	A	1	2	1	3	13	22853	17496	6310	4438	-0.749616944	58	5.339565029	5.936169262	0.161411633	5.437859121	0.229550389	0.913822997	0.021162494	0.020401134	0.584152127	0.055535962	0.055478972	0.91306663	0.018903027	0.018686812	5.93594007	0.161594612	0.91077193	0.060853894	0.059914168	-0.093462764	0.066726261	0.06544798	0.06093259	0.145780199	5.713676746	0.218577432	0.980948562	0.132500118	0.063754603	172	185	0.463608439	0.059529615	1.002776876	1.00925651	0.129593523	0.987050723	0.128404942	0.977997876	NO
83	2954	191	1182	A	SINGLE.SITE	ADE6_G3327A	2	1587	1P09E01	ADE6	NAN	YES	x	A03	3	A	1	2	1	3	13	16002	11390	2174	2061	-0.947287314	61	5.408062851	5.990595004	0.072438396	5.74084094	0.100482357	0.958005896	0.008968955	0.008999227	0.604568331	0.058998741	0.058930429	0.95757409	0.007767518	0.008110184	5.990635716	0.072725768	1.081867343	0.035482606	0.036740876	0.078688569	0.032570065	0.034005786	0.408981076	0.063119417	5.768372393	0.566625918	1.181258571	0.049839335	0.033964331	172	185	0.663918448	0.029739342	1.012376217	1.445323164	0.064741325	0.493103128	0.044793667	0.341171539	NO
17	1565	191	1182	A	EMS.MUTANT	1P01D03	1	1565	1P01D03	NAN	NAN	NAN	x	A04	4	A	1	2	1	3	13	15061	11000	2656	2541	-0.424615358	61	5.40448242	5.990835478	0.067353367	5.73603856	0.091948418	0.957068113	0.007850445	0.007991278	0.628970192	0.054766639	0.054711981	0.956922119	0.006860056	0.007224243	5.990878445	0.067168126	1.078907182	0.031185683	0.032581748	0.07594866	0.028839897	0.030235016	0.403882658	0.056260302	5.768615121	0.561527499	1.177792962	0.04298022	0.029141053	172	185	0.660452838	0.024916064	1.012418817	1.437778675	0.054241248	0.413129157	0.037725728	0.287338492	NO
CTRL	1617	191	1182	A	WT	WT	1	NAN	NAN	NAN	NAN	NAN	x	A05	5	A	1	2	1	3	13	20882	16142	5135	4070	-0.547201147	58	5.332792058	5.933209301	0.144889655	5.44814183	0.207092649	0.915237317	0.019598828	0.019856437	0.594859561	0.05399738	0.053944991	0.913248761	0.018751429	0.018489003	5.932887762	0.144813943	0.911357706	0.060120982	0.060024545	-0.092819807	0.065921051	0.065205131	0.062356856	0.145840898	5.710624439	0.220001698	0.981634359	0.132560816	0.063874719	172	185	0.464294236	0.059649731	1.002241182	1.010749462	0.129855011	0.989042346	0.128473985	0.978523742	NO
68	2800	191	1182	A	SINGLE.SITE	NAM7_G1304A	1	1575	1P04G01	NAM7	NAN	YES	x	A06	6	A	1	2	1	3	13	21805	16458	6760	3925	-0.942078551	59	5.345157702	5.941154509	0.145931323	5.525258661	0.19604608	0.925659734	0.019371822	0.02020889	0.60409127	0.054125585	0.054072823	0.924121907	0.018102063	0.018625673	5.941601176	0.145607462	0.947884044	0.063035747	0.065200803	-0.0535231	0.067005747	0.068362657	0.147384896	0.145504421	5.719337852	0.305029737	1.024397581	0.13222434	0.069366926	172	185	0.507057458	0.065141938	1.003770427	1.103843239	0.14181132	1.080107726	0.128470525	0.978497388	NO
13	1496	191	1182	A	EMS.MUTANT	1P09F07	1	1496	1P09F07	NAN	NAN	NAN	x	A07	7	A	1	2	1	3	13	20061	15969	5637	4072	-0.612961694	57.5	5.323037446	5.927884175	0.150784412	5.364538801	0.191965549	0.901350401	0.017836191	0.017848554	0.693636006	0.035040225	0.035025895	0.900588142	0.016909215	0.017181538	5.928104591	0.151290047	0.872561444	0.049364758	0.050645427	-0.136322204	0.056666086	0.057452692	-0.036649224	0.135859023	5.705841267	0.120995617	0.936213623	0.122578942	0.053497305	172	185	0.4188735	0.049272317	1.001401713	0.911870388	0.107263808	0.816976158	0.117630542	0.89593452	NO
55	2525	191	1182	A	SINGLE.SITE	PRE7_G83A	1	1496	1P09F07	PRE7	NAN	YES	x	A08	8	A	1	2	1	3	13	20259	16104	5840	4347	-0.470734493	58	5.318477728	5.923294804	0.142529351	5.357172258	0.182798283	0.902190479	0.017717779	0.018323088	0.690846237	0.035680183	0.035665053	0.901386225	0.017396517	0.017707213	5.923317948	0.142192615	0.874895237	0.050765099	0.053040915	-0.133651129	0.058153562	0.059710952	-0.030408217	0.141399808	5.701054624	0.127236624	0.938945912	0.128119727	0.056265538	172	185	0.421605789	0.05204055	1.000561635	0.917818468	0.113290137	0.862875774	0.123434144	0.940137733	NO
CTRL	1617	191	1182	A	WT	WT	1	NAN	NAN	NAN	NAN	NAN	x	A09	9	A	1	2	1	3	13	21227	16447	5059	4268	-0.421951263	57	5.32316583	5.928337463	0.132133986	5.447812849	0.203307969	0.916240889	0.021169987	0.020756834	0.557349998	0.060538202	0.060464409	0.914722901	0.019419663	0.019280192	5.928211971	0.132314494	0.916129713	0.062957389	0.063152361	-0.087597317	0.068971496	0.068279832	0.073884641	0.15168184	5.705948647	0.231529483	0.987221188	0.138401758	0.067462417	172	185	0.469881064	0.063237428	1.001420559	1.022911758	0.137665281	1.048529367	0.134581776	1.025043812	NO
129	3226	191	1182	A	SINGLE.SITE	ADE5_G2081A	1	1597	1P11D07	ADE5	NAN	YES	x	A10	10	A	1	2	1	3	13	15288	11153	2351	2222	-0.722933403	60	5.379438671	5.968767015	0.062608832	5.675916671	0.082182164	0.951036225	0.007442242	0.007686828	0.7197322	0.038752396	0.038733015	0.950849053	0.007228822	0.007372425	5.96887416	0.062650378	1.052046597	0.031178308	0.031642083	0.050737407	0.029564605	0.030143563	0.35639126	0.057295168	5.746610837	0.514036101	1.146345924	0.044015087	0.02845856	172	185	0.6290058	0.024233571	1.008556963	1.369319766	0.052755488	0.401812845	0.038526785	0.293439747	NO
185	3139	191	1182	A	NULL	NULL	1	NAN	NAN	NAN	NAN	NAN	x	A11	11	A	1	2	1	3	13	20586	16651	6012	5805	-0.14023831	57	5.308715654	5.886982835	0.121478637	2.937016107	0.207191225	0.497715668	0.034454964	0.035884625	0.611363809	-0.019304989	-0.019302592	0.498134494	0.034611598	0.035810698	5.887110957	0.121662665	0.515801528	0.004341231	0.004274537	-0.662033223	0.008427312	0.008278089	-3.18383809	0.266835774	5.664847634	-3.026193248	0.518536838	0.253555693	0.004755352	172	185	0.001196714	0.000530363	0.99420714	0.002605198	0.001154579	0.008793865	0.443182858	3.375507887	NO
106	3183	191	1182	A	SINGLE.SITE	EXG2_C379T	1	2140	2P15D07	EXG2	A	NO	x	A12	12	A	1	2	1	3	13	21644	17095	5485	4453	-0.460549558	57	5.324209221	5.920285634	0.127796583	5.440633627	0.193938397	0.915224694	0.020200019	0.020019339	0.562897463	0.059511864	0.059441756	0.913098215	0.018712237	0.018431824	5.920702386	0.12817627	0.910873456	0.060077542	0.059467428	-0.093351298	0.065917812	0.064788583	0.061179588	0.144657478	5.698439062	0.21882443	0.981067424	0.131377396	0.063230003	172	185	0.4637273	0.059005014	1.000102592	1.009515267	0.128451491	0.978352416	0.127240761	0.969130877	NO
161	R128	191	1182	A	RAP1.MUTANT	PLATE	1	NAN	NAN	RAP1	NAN	NAN	x	B02	2	B	1	2	1	3	13	23345	18859	7525	6640	0.069061327	56	5.280335749	5.838162173	0.109405036	5.382881167	0.14768935	0.920905081	0.014458842	0.014664303	0.727542106	0.033120521	0.033108419	0.920715099	0.014233771	0.014216404	5.838166102	0.109611106	0.936103667	0.04881852	0.047906991	-0.066029054	0.052119007	0.051288437	0.120743641	0.109797459	5.621767693	0.282446472	1.012682829	0.102723693	0.052687049	182	185	0.495342706	0.048462061	0.986689737	1.08318506	0.105973864	0.822520997	0.097835418	0.759354082	NO
CTRL	1617	191	1182	A	WT	WT	1	NAN	NAN	NAN	NAN	NAN	x	B03	3	B	1	2	1	3	13	19956	15361	5216	3406	-0.830948214	58	5.331499895	5.928521036	0.14652445	5.429816011	0.214995432	0.913607488	0.020018066	0.020246579	0.58892232	0.054766639	0.054711981	0.912363355	0.017951877	0.018711683	5.928239124	0.146782714	0.908517857	0.057711305	0.059799002	-0.095940739	0.063433832	0.065382137	0.055432996	0.146302377	5.711840715	0.217135828	0.98025541	0.139228611	0.066895621	172	185	0.462915287	0.062670633	1.002454644	1.007747547	0.136431391	1.03913143	0.135382509	1.031142604	NO
172	1617	191	1182	A	WT	WT	1	NAN	NAN	NAN	NAN	NAN	x	B04	4	B	1	2	1	3	13	18835	15299	5207	4699	0.347792749	57	5.304077452	5.908297857	0.102276909	5.401872493	0.168937911	0.912139215	0.019254729	0.018886931	0.607496685	0.05156181	0.051516188	0.911269407	0.018541065	0.018125682	5.908535241	0.102439922	0.90503616	0.058847318	0.05801752	-0.09978038	0.065097822	0.063447764	0.046878297	0.143163355	5.692136832	0.208581129	0.976162638	0.136089589	0.064830422	172	185	0.458822514	0.060605433	0.998996521	0.998837749	0.131935536	1.004888692	0.132089057	1.006057984	NO
37	2140	191	1182	A	EMS.MUTANT	2P15D07	1	2140	2P15D07	NAN	NAN	NAN	x	B06	6	B	1	2	1	3	13	19946	15807	5162	4017	-0.384283736	56	5.300555454	5.870933866	0.122872052	5.172640872	0.194719709	0.88027204	0.018890747	0.01978639	0.524856258	0.060538202	0.060464409	0.879941207	0.017900814	0.018248486	5.871169632	0.12342843	0.816980552	0.043908901	0.046549303	-0.202139989	0.05371216	0.056005542	-0.198108324	0.14675139	5.654771223	-0.036405492	0.872652313	0.139677624	0.052081615	172	185	0.35531219	0.047856627	0.992438683	0.773500029	0.104181908	0.793502834	0.134688952	1.025860122	NO
CTRL	1617	191	1182	A	WT	WT	1	NAN	NAN	NAN	NAN	NAN	x	B07	7	B	1	2	1	3	13	20798	16474	4469	4084	0.062060203	57	5.307629265	5.895937758	0.075039773	5.384764571	0.151290318	0.912155193	0.019635274	0.018893549	0.480275738	0.073250342	0.073119751	0.911606086	0.018674296	0.018135557	5.896066748	0.075374342	0.906104531	0.059488486	0.057724152	-0.098600603	0.065467749	0.063289235	0.049511129	0.142064917	5.679668339	0.21121396	0.97741852	0.134991151	0.06447668	172	185	0.460078396	0.060251692	0.996808242	1.001571753	0.131165456	0.999023365	0.130959619	0.997455611	NO
191	1182	191	1182	A	GFP.MATALPHA	GFP.MATALPHA	1	NAN	NAN	NAN	NAN	NAN	x	B08	8	B	1	2	1	3	13	19999	15643	5280	4730	0.297976811	57	5.297076488	5.895733789	0.09563947	5.170506652	0.18757217	0.874646624	0.024154908	0.023537376	0.488976708	0.065415083	0.065322015	0.872940923	0.023812819	0.022600702	5.895885744	0.096186911	0.800083124	0.055916415	0.052762261	-0.223039653	0.069695285	0.065583744	-0.252850562	0.175697951	5.679487335	-0.09114773	0.852789203	0.168624185	0.059525523	172	185	0.33544908	0.055300534	0.996776475	0.730258855	0.120386989	0.916929036	0.164855226	1.255621934	NO
102	3174	191	1182	A	RAP1.MUTANT	F548	1	NAN	NAN	RAP1	NAN	NAN	x	B09	9	B	1	2	1	3	13	23172	18648	7461	6272	-0.150795878	56	5.261948059	5.829590955	0.108115952	5.346528026	0.148665122	0.916091278	0.014112447	0.014474617	0.704359543	0.03632017	0.036304212	0.915813482	0.013697026	0.013942401	5.829814798	0.108357461	0.919695651	0.04482119	0.045309149	-0.083712478	0.048902607	0.049321453	0.082412983	0.107901156	5.613416389	0.244115815	0.993395029	0.10082739	0.049769696	182	185	0.476054905	0.045544707	0.98522398	1.04100768	0.099594373	0.773006291	0.095671122	0.7425558	NO
65	2795	191	1182	A	SINGLE.SITE	SDS23_G676A	2	1487	1P07H05	SDS23	NAN	YES	x	B10	10	B	1	2	1	3	13	20992	16589	5782	4594	-0.533640273	58	5.318651254	5.916405248	0.126414246	5.459926733	0.186506721	0.920265799	0.019042949	0.019229056	0.571205337	0.058998741	0.058930429	0.918307313	0.017977475	0.017595123	5.916779425	0.126580439	0.927965085	0.060005291	0.058897469	-0.074761174	0.064837472	0.063131036	0.101914768	0.137552123	5.700381016	0.263617599	1.003115839	0.130478357	0.06567415	172	185	0.485775715	0.061449161	1.000443414	1.057513759	0.133772298	1.01887841	0.126496981	0.963465866	NO
CTRL	1617	191	1182	A	WT	WT	1	NAN	NAN	NAN	NAN	NAN	x	B11	11	B	1	2	1	3	13	20947	16418	5295	4039	-0.512100587	57	5.317235931	5.919046173	0.126203932	5.425887837	0.186165694	0.913604717	0.019383399	0.019453169	0.599303414	0.053099992	0.053050169	0.911580831	0.018349745	0.018218883	5.919195478	0.125912656	0.906024295	0.058287096	0.058456847	-0.098689158	0.06439758	0.063839878	0.049313639	0.143896568	5.702797069	0.211016471	0.977324201	0.136822802	0.065338638	172	185	0.459984077	0.06111365	1.000867442	1.001366425	0.133041902	1.013315346	0.132860359	1.011932617	NO
14	1509	191	1182	A	EMS.MUTANT	1P12D09	1	1509	1P12D09	NAN	NAN	NAN	x	B12	12	B	1	2	1	3	13	21327	16890	5342	4998	0.187591088	58	5.322812304	5.929804509	0.111871969	5.470612595	0.156709378	0.919395791	0.01845466	0.018311785	0.769276331	0.025316089	0.025310683	0.91853965	0.018694673	0.01809685	5.929668123	0.111739697	0.928743741	0.062669429	0.060209441	-0.073922422	0.067521756	0.064705268	0.103731627	0.140360922	5.713269714	0.265434459	1.004031156	0.133287156	0.067209913	172	185	0.486691033	0.062984924	1.00270544	1.059506368	0.13711559	1.044342641	0.129414597	0.985687932	NO
185	3139	191	1182	A	NULL	NULL	1	NAN	NAN	NAN	NAN	NAN	x	C01	1	C	1	2	1	3	13	19792	15653	5170	4957	-0.337868394	57	5.323122851	5.915447325	0.156760172	2.960946196	0.19951622	0.499679963	0.028298868	0.031065958	0.369595717	0.021990602	0.021987058	0.498964397	0.027851204	0.030900013	5.915366992	0.156638273	0.515905829	0.003511378	0.00374794	-0.661831032	0.006807774	0.007257886	-3.17734824	0.232449755	5.697048301	-3.021004692	0.5186344	0.222804698	0.004200365	172	185	0.001294277	-2.46E-05	0.999858507	0.002817587	-5.36E-05	-0.000408286	-0.019025263	-0.144906158	NO
185	3139	185	3139	A	NULL	NULL	1	NAN	NAN	NAN	NAN	NAN	x	C02	2	C	1	2	1	3	13	20226	16276	5679	5502	0.14682702	57	5.314213812	5.910453908	0.123747977	2.946452265	0.195019846	0.497250029	0.028614021	0.03084441	0.266692406	0.039008446	0.038988678	0.495777977	0.027644914	0.03047423	5.910121532	0.123865159	0.515509027	0.003393934	0.00369085	-0.662600464	0.006586527	0.007147781	-3.202266056	0.234684598	5.691802841	-3.045922508	0.518170448	0.22503954	0.004138089	172	185	0.000830325	-8.69E-05	0.998937904	0.001807583	-0.000189177	-0.00144087	-0.104657525	-0.797125372	NO
119	3204	191	1182	A	SINGLE.SITE	TRA1_G8560A	2	2013	2P01D04	TRA1	NAN	YES	x	C03	3	C	1	2	1	3	13	21421	17060	5881	4801	-0.259523784	57	5.293505938	5.8863339	0.102776056	5.414548868	0.149367514	0.917397186	0.015722936	0.016447621	0.653860226	0.044770984	0.044741106	0.91620461	0.015107818	0.015658238	5.886469014	0.10253009	0.920981972	0.049771952	0.05142376	-0.082314817	0.054072745	0.055639107	0.085471601	0.122088758	5.668150324	0.241815149	0.992260696	0.112443701	0.055376107	172	185	0.474920572	0.051151119	0.994786777	1.033882559	0.111353883	0.848128268	0.107704576	0.820333277	NO
CTRL	1617	191	1182	A	WT	WT	1	NAN	NAN	NAN	NAN	NAN	x	C04	4	C	1	2	1	3	13	21666	16567	5579	3799	-0.790408976	58	5.326712045	5.922653848	0.154066136	5.427937048	0.216934024	0.913548528	0.019870551	0.019800522	0.609683989	0.05130547	0.051260525	0.912219276	0.017841605	0.018317498	5.923022533	0.154101797	0.908057586	0.056438954	0.058767766	-0.096447482	0.062204867	0.064169355	0.054306276	0.143941478	5.704703842	0.210649824	0.977149144	0.13429642	0.064108675	172	185	0.45980902	0.059883687	1.00120209	1.000985332	0.130364324	0.992921535	0.130235998	0.991944141	NO
1	54	190	1180	A	EMS.MUTANT	Y54	1	54	Y54	NAN	NAN	NAN	a	C05	5	C	1	2	1	3	13	18462	15851	5946	5597	1.23182007	55	5.256934041	5.841792923	0.081876035	5.173765912	0.143890285	0.886094216	0.015833895	0.015479664	0.335599995	0.094233779	0.093956323	0.886137216	0.013621079	0.013663938	5.841861013	0.081997333	0.832728131	0.035097004	0.036037535	-0.183048064	0.042359636	0.042908764	-0.149655515	0.108238393	5.623542323	0.006688033	0.889071849	0.098593335	0.038381367	170	171	0.372932523	0.034285461	0.996502726	0.993123239	0.091302544	0.582009841	0.091934758	0.586039897	NO
110	3190	191	1182	A	SINGLE.SITE	CCC2_G2159A	1	2140	2P15D07	CCC2	A	YES	x	C06	6	C	1	2	1	3	13	20484	16597	5691	5008	0.027502767	57	5.294127726	5.889515432	0.101647123	5.342015833	0.182923187	0.904733766	0.020895511	0.020198672	0.516446169	0.065928615	0.065833342	0.903397379	0.019700928	0.01891148	5.889507614	0.10180654	0.880841365	0.058424161	0.057234026	-0.126877732	0.066738427	0.064135205	-0.014680979	0.150197207	5.671188923	0.141662568	0.945327181	0.14055215	0.062622309	172	185	0.427987058	0.05839732	0.995320065	0.931710228	0.127128565	0.968276335	0.136446463	1.039246222	NO
74	2910	191	1182	A	SINGLE.SITE	ADE4_G856A	1	1595	1P11B11	ADE4	NAN	YES	x	C07	7	C	1	2	1	3	13	22526	18477	8393	7713	0.029554896	54	5.240142749	5.808038031	0.106129871	5.364074229	0.151490322	0.923250107	0.011832907	0.01210335	0.467940478	0.078393018	0.07823302	0.923758331	0.008693747	0.009217077	5.808186575	0.106492301	0.946611824	0.030407987	0.032135394	-0.05486617	0.032103251	0.03392509	0.144541727	0.071918669	5.589867885	0.300885275	1.022227832	0.062273612	0.032534578	172	185	0.504887708	0.028309589	0.981047845	1.099119783	0.061628812	0.469396636	0.056071061	0.427065951	NO
CTRL	1617	191	1182	A	WT	WT	1	NAN	NAN	NAN	NAN	NAN	x	C08	8	C	1	2	1	3	13	20007	16016	5261	4866	0.370525356	57	5.312435114	5.905409699	0.092940999	5.400874588	0.155738775	0.912010556	0.017760184	0.017351987	0.669551958	0.041057032	0.041033986	0.911361752	0.017604669	0.016868109	5.905595916	0.09285018	0.905328919	0.055721189	0.053669691	-0.099456956	0.061482704	0.058903311	0.047600443	0.132339099	5.687277225	0.203943991	0.97395871	0.122694041	0.058178635	172	185	0.456618586	0.053953647	0.998143637	0.994039889	0.117454871	0.89459652	0.118159112	0.899960384	NO
176	2005	191	1182	A	CHR2SNP.69593(T)	POLYMORPHISM	2	NAN	NAN	NAN	NAN	NAN	x	C09	9	C	1	2	1	3	13	20129	16025	3973	3688	0.282761728	57	5.309346916	5.889463062	0.063333501	5.371609006	0.130482826	0.911762806	0.017656146	0.016903841	0.431885906	0.081480586	0.081300982	0.911319809	0.017036208	0.016203267	5.889822888	0.063863904	0.90519592	0.054105735	0.051446031	-0.099603872	0.059780033	0.056549537	0.047272442	0.126897598	5.671504197	0.20361599	0.973803205	0.11725254	0.05558017	172	185	0.456463081	0.051355182	0.995375397	0.99370136	0.111798119	0.851511797	0.112506758	0.856909159	NO
10	333	190	1180	A	EMS.MUTANT	Y333	1	333	Y333	NAN	NAN	NAN	a	C10	10	C	1	2	1	3	13	18764	15141	4642	3964	0.238616131	55	5.265844595	5.840375868	0.090874361	5.294346002	0.146417639	0.906384242	0.015599372	0.016987462	0.603746732	0.051818156	0.051771852	0.906332248	0.01517028	0.016288937	5.839909874	0.091084442	0.889688062	0.046151643	0.04953998	-0.11688437	0.051700516	0.055437278	0.008269698	0.127056249	5.621591184	0.164613245	0.955670985	0.117411191	0.053526448	170	171	0.439531659	0.049430542	0.99615698	1.170477441	0.131634054	0.839103836	0.112461847	0.716890225	NO
92	3091	191	1182	A	SINGLE.SITE	SSN2_C2911T	1	89	Y89	SSN2	NAN	YES	x	C11	11	C	1	2	1	3	13	23694	18408	7910	7105	0.458800067	56	5.304505599	5.880185697	0.095159848	5.401035028	0.174597499	0.918170178	0.019181052	0.01968333	0.348887389	0.096813743	0.096512958	0.918197666	0.017003442	0.017525685	5.880219798	0.096072102	0.927598093	0.057133581	0.057599967	-0.07515673	0.061646738	0.062247785	0.101057307	0.13463727	5.661901108	0.257400855	0.999996448	0.124992212	0.062522889	172	185	0.482656324	0.0582979	0.993690011	1.050722974	0.126912131	0.966627867	0.12078553	0.91996453	NO
CTRL	1617	191	1182	A	WT	WT	1	NAN	NAN	NAN	NAN	NAN	x	C12	12	C	1	2	1	3	13	20433	16083	5218	4655	-0.015497239	58	5.322296068	5.921517926	0.113626748	5.42430982	0.172417816	0.912676491	0.01980802	0.018624892	0.647564307	0.044770984	0.044741106	0.911256125	0.018866284	0.017914694	5.921503764	0.113536319	0.904994073	0.060124138	0.057170291	-0.099826885	0.066013319	0.062638208	0.046774438	0.141087395	5.703185073	0.203117985	0.973567199	0.131442337	0.062275411	172	185	0.456227076	0.058050423	1.000935539	0.993187586	0.126373383	0.962524485	0.127240196	0.969126576	NO
32	2053	191	1182	A	EMS.MUTANT	2P05G06	1	2053	2P05G06	NAN	NAN	NAN	x	D01	1	D	1	2	1	3	13	21987	17481	7760	4530	-0.778132601	57	5.277610096	5.875297166	0.143801386	5.289537671	0.239816927	0.897333898	0.025563731	0.027039545	0.393653339	0.085728525	0.085519429	0.894913742	0.022697665	0.023816644	5.875569423	0.144683667	0.856381439	0.062832613	0.064762013	-0.155039395	0.073622211	0.075578549	-0.081023054	0.181610058	5.661599771	0.076810929	0.91734985	0.174896241	0.073031017	172	185	0.400009726	0.068806028	0.993637125	0.870804728	0.149787895	1.14086141	0.172010888	1.310123123	NO
CTRL	1617	191	1182	A	WT	WT	1	NAN	NAN	NAN	NAN	NAN	x	D02	2	D	1	2	1	3	13	19862	15342	5259	4142	-0.559188293	58	5.323886361	5.925943473	0.139341393	5.438508329	0.205030948	0.914689321	0.019955242	0.019645133	0.600021771	0.053099992	0.053050169	0.912941703	0.018419868	0.018292147	5.926438767	0.14078174	0.910370617	0.059162378	0.058686264	-0.093903491	0.064911557	0.064113192	0.059955658	0.14293209	5.712469115	0.217789642	0.980569653	0.136218273	0.06549204	172	185	0.46322953	0.061267051	1.002564931	1.008431641	0.133375852	1.015858878	0.132260678	1.007365138	NO
172	1617	191	1182	A	WT	WT	1	NAN	NAN	NAN	NAN	NAN	x	D03	3	D	1	2	1	3	13	20383	15912	5474	4591	-0.349309609	58	5.310316283	5.907099503	0.125586842	5.415352355	0.197420986	0.914217247	0.020565765	0.020705286	0.554338363	0.060923112	0.060847905	0.912463781	0.018956697	0.019271346	5.907005256	0.125857855	0.908838968	0.061212541	0.062732126	-0.095587353	0.066978322	0.067995056	0.056218308	0.153357986	5.693035605	0.214052291	0.978776135	0.146644169	0.070241671	172	185	0.461436012	0.066016683	0.99915426	1.004527226	0.143715604	1.094611733	0.143067904	1.089678512	NO
156	3274	191	1182	A	SINGLE.SITE	ADE2_C1477T	1	2217	2P09C10	ADE2	NAN	YES	x	D05	5	D	1	2	1	3	13	21572	16808	4499	3898	-0.518177758	57	5.310362741	5.894288364	0.091880243	5.421788956	0.169157356	0.918456439	0.022235296	0.022029194	0.554820195	0.061692985	0.061614895	0.917774861	0.021873797	0.021235531	5.894467523	0.09226657	0.926185927	0.07258856	0.07165246	-0.07668028	0.078727437	0.076380723	0.097750974	0.168039	5.680497872	0.255584957	0.999088934	0.161325183	0.080550755	172	185	0.481748811	0.076325766	0.996953829	1.048747354	0.166158055	1.265544943	0.158434778	1.206720511	NO
CTRL	1617	191	1182	A	WT	WT	1	NAN	NAN	NAN	NAN	NAN	x	D06	6	D	1	2	1	3	13	21212	16775	6292	4220	-0.673601431	57	5.309074758	5.909385647	0.130184461	5.409993954	0.209564471	0.912788181	0.021501873	0.02160373	0.521673163	0.066185394	0.066089006	0.91122049	0.01973339	0.019596763	5.909773581	0.131255337	0.904881173	0.062216554	0.061524887	-0.099951646	0.068530463	0.067787763	0.046495779	0.151876177	5.695803929	0.204329762	0.974141669	0.14516236	0.068859144	172	185	0.456801545	0.064634155	0.999640114	0.994438183	0.140705898	1.071688269	0.141492856	1.07768214	NO
98	3109	191	1182	A	RAP1.MUTANT	P589.LARGE	1	NAN	NAN	RAP1	NAN	NAN	x	D07	7	D	1	2	1	3	13	22775	17875	4992	4458	-0.287663543	57	5.319045169	5.89993617	0.07813529	5.431911897	0.142126326	0.918880252	0.018014662	0.018070599	0.533692858	0.065286705	0.065194183	0.918772981	0.017173461	0.017229301	5.900062216	0.07808895	0.929527159	0.058216191	0.057052101	-0.073079254	0.062271589	0.061467899	0.105556274	0.132758039	5.686092564	0.263390257	1.003001423	0.126044222	0.063427879	182	185	0.485661299	0.05920289	0.997979547	1.062014354	0.129461251	1.004819427	0.121901602	0.946144865	NO
192	2884	190	1180	A	TATA.22	CIS	1	NAN	NAN	NAN	NAN	NAN	a	D09	9	D	1	2	1	3	13	20792	15953	5213	3925	-0.738097445	58	5.329614382	5.930526241	0.130052695	5.462658496	0.19581497	0.918523279	0.019756475	0.019927695	0.596009394	0.054382001	0.054328486	0.916837691	0.018097543	0.018613024	5.930302424	0.130340177	0.923072376	0.059659662	0.061130862	-0.080047633	0.064831525	0.066038718	0.090422302	0.144418324	5.716332772	0.248256285	0.995443055	0.137704508	0.068254738	172	185	0.478102931	0.064029749	1.003243021	1.040810424	0.139390131	1.061666711	0.133924611	1.020038507	NO
CTRL	1617	191	1182	A	WT	WT	1	NAN	NAN	NAN	NAN	NAN	x	D10	10	D	1	2	1	3	13	20647	16148	5371	4766	-0.053527716	58	5.318938806	5.915573413	0.112347663	5.420839946	0.177397249	0.913595843	0.019071386	0.018548378	0.63132004	0.047717403	0.047681236	0.912450818	0.018180011	0.017726138	5.916013802	0.112713506	0.908797504	0.058122616	0.056893641	-0.095632977	0.064045949	0.062162531	0.056116938	0.139099044	5.70204415	0.213950921	0.978727582	0.132385227	0.063405296	172	185	0.461387459	0.059180308	1.000735301	1.004421528	0.128833097	0.981258929	0.128265966	0.976939364	NO
34	2067	191	1182	A	EMS.MUTANT	2P07D07	1	2067	2P07D07	NAN	NAN	NAN	x	D11	11	D	1	2	1	3	13	17616	13995	4845	4092	0.114965398	58	5.32218638	5.905808828	0.077556863	5.398738374	0.14358881	0.914111091	0.016143108	0.016797371	0.441260957	0.080065262	0.079894833	0.914024775	0.015219644	0.015499971	5.905645033	0.078310832	0.913862918	0.048807067	0.050164312	-0.090074699	0.053797788	0.054643897	0.06842529	0.121146209	5.691675382	0.226259273	0.984659039	0.114432392	0.055485619	172	185	0.467318916	0.051260631	0.998915534	1.017334066	0.111592286	0.849944068	0.109690897	0.835462112	NO
39	2146	191	1182	A	EMS.MUTANT	2P15G08	1	2146	2P15G08	NAN	NAN	NAN	x	D12	12	D	1	2	1	3	13	15086	10920	2541	2441	-0.674777028	61	5.360543537	5.955361065	0.062883023	5.625841104	0.095415316	0.944392809	0.01052231	0.010592406	0.691494625	0.042465634	0.042440135	0.944296352	0.010393045	0.010319441	5.955335078	0.062936367	1.024460216	0.042427472	0.042207173	0.024165855	0.041602407	0.041184927	0.305149121	0.080443948	5.741365426	0.462983105	1.114165354	0.073730131	0.045298552	172	185	0.59682523	0.041073564	1.007636369	1.299263988	0.089415459	0.681033987	0.068820086	0.524169063	NO
CTRL	1617	191	1182	A	WT	WT	1	NAN	NAN	NAN	NAN	NAN	x	E01	1	E	1	2	1	3	14	21415	16548	5954	4050	-0.77529878	58	5.325619547	5.924814066	0.162337849	5.432706368	0.222626553	0.914690534	0.020298285	0.020275954	0.597804365	0.053484576	0.053433664	0.913156225	0.018094885	0.01863487	5.92478273	0.162494803	0.911059983	0.058287225	0.059988051	-0.093146541	0.063941665	0.065383901	0.061633221	0.145857739	5.710099431	0.221599781	0.982405015	0.135998639	0.06563605	172	185	0.465064891	0.061411061	1.002149041	1.012427148	0.133689355	1.018246678	0.13204837	1.005748097	NO
48	2504	191	1182	A	SINGLE.SITE	CYC8_G1010A	1	126	Y126	CYC8	NAN	YES	x	E03	3	E	1	2	1	3	14	17771	14108	5086	4614	0.482889552	57	5.303951002	5.8902944	0.09548347	5.238116386	0.167460845	0.888263005	0.016952832	0.018607316	0.459067884	0.0728648	0.072736256	0.888821423	0.016001471	0.017285219	5.890865375	0.096280993	0.839790701	0.042433753	0.046996967	-0.174602584	0.050608745	0.055138205	-0.128665004	0.138222907	5.676182077	0.031301556	0.898772534	0.128363807	0.051215922	172	185	0.38143241	0.046990933	0.996196387	0.830362675	0.102297329	0.779148914	0.123195963	0.938323623	NO
CTRL	1617	191	1182	A	WT	WT	1	NAN	NAN	NAN	NAN	NAN	x	E05	5	E	1	2	1	3	14	19084	15162	5196	3633	-0.80002811	57	5.311223875	5.915517496	0.135683616	5.421454201	0.203879188	0.913537236	0.020228219	0.020687704	0.574392891	0.057331306	0.057268616	0.911737584	0.019006826	0.019169877	5.915745009	0.136234182	0.906522575	0.060354303	0.060433158	-0.098139346	0.066783747	0.066486209	0.050539446	0.148579187	5.701061711	0.210506006	0.977080495	0.138720087	0.066210865	172	185	0.459740371	0.061985876	1.000562879	1.000835886	0.134940704	1.027777592	0.134828003	1.026919205	NO
43	2182	191	1182	A	EMS.MUTANT	2P19F12	1	2182	2P19F12	NAN	NAN	NAN	x	E06	6	E	1	2	1	3	14	18797	14917	3953	3695	0.174432051	56	5.300222388	5.875147535	0.066588188	5.401596963	0.138191048	0.919164622	0.017610882	0.016935013	0.272184243	0.110121554	0.109679626	0.918902091	0.015931996	0.0154837	5.875176751	0.066769428	0.929961264	0.054253818	0.051701351	-0.072612345	0.057990973	0.05555814	0.106565912	0.120185645	5.660493452	0.266532472	1.004585132	0.110326545	0.055693166	172	185	0.487245009	0.051468178	0.99344296	1.060712351	0.112044107	0.85338537	0.105631001	0.804539863	NO
90	3088	191	1182	A	SINGLE.SITE	RIM8_C436T	1	1480	1P06B05	RIM8	NAN	YES	x	E07	7	E	1	2	1	3	14	19555	15463	5372	4029	-0.702338717	57	5.305143779	5.906609757	0.149079489	5.370342817	0.218000269	0.907520819	0.021231441	0.020566153	0.619618269	0.048742436	0.04870389	0.906717268	0.019137635	0.019260297	5.906640151	0.149064586	0.890863783	0.058265822	0.059263997	-0.115563744	0.065475975	0.065887447	0.011280558	0.151538696	5.691956852	0.171247118	0.958705348	0.141679596	0.06502005	172	185	0.441365224	0.060795061	0.998964934	0.960833946	0.132348349	1.00803289	0.137743207	1.049122894	NO
152	3268	191	1182	A	SINGLE.SITE	NAP1_G1034A	2	1523	1P16A09	NAP1	NAN	YES	x	E08	8	E	1	2	1	3	14	20000	16178	4269	3866	0.121896919	57	5.308798696	5.889320193	0.071050553	5.377922459	0.148646998	0.912400728	0.018871277	0.018529794	0.439355395	0.08032257	0.080150496	0.912161531	0.018036808	0.017687294	5.889558082	0.071869522	0.907873265	0.057213163	0.056256888	-0.096650487	0.063007238	0.061712296	0.053854711	0.137853753	5.674874783	0.213821271	0.978665491	0.127994653	0.061294504	172	185	0.461325368	0.057069515	0.995966951	1.004286358	0.124237989	0.946260226	0.123707733	0.942221527	NO
CTRL	1617	191	1182	A	WT	WT	1	NAN	NAN	NAN	NAN	NAN	x	E09	9	E	1	2	1	3	14	20697	16461	5805	4631	-0.456960106	58	5.307271737	5.902794566	0.122020182	5.404708882	0.187175221	0.912974013	0.019566331	0.020075882	0.596508819	0.053612774	0.053561496	0.911898459	0.018397365	0.018932397	5.903334395	0.121904862	0.907034593	0.05855232	0.060631268	-0.097574689	0.06485576	0.066215889	0.051797488	0.14887884	5.688651097	0.211764048	0.977681334	0.13901974	0.066437417	172	185	0.46034121	0.062212428	0.998384758	1.002143888	0.135433899	1.031534018	0.135144165	1.029327255	NO
76	2915	191	1182	A	SINGLE.SITE	ADE6_G1055A	1	1565	1P01D03	ADE6	NAN	YES	x	E10	10	E	1	2	1	3	14	13967	10150	2879	2695	-0.116001093	61	5.382040603	5.971806329	0.073462273	5.674635212	0.094713701	0.950281695	0.009195817	0.009558946	0.758605941	0.03209678	0.032085765	0.950213933	0.00901253	0.009319442	5.971903331	0.073502057	1.049310499	0.038770455	0.039979501	0.048133281	0.036945175	0.038073829	0.35142462	0.072752394	5.757220032	0.51139118	1.144638073	0.062893295	0.040557112	172	185	0.62729795	0.036332124	1.010418926	1.365601846	0.079093539	0.602416951	0.057918448	0.441136597	NO
80	2919	191	1182	A	SINGLE.SITE	ADE6_G3327A	1	1587	1P09E01	ADE6	NAN	YES	x	E11	11	E	1	2	1	3	14	15051	11145	3157	2994	-0.32177173	62	5.397494246	5.984483206	0.072247976	5.720059611	0.101536679	0.95565255	0.008659945	0.008896811	0.591827051	0.060794807	0.060720073	0.95546894	0.007879509	0.007936086	5.984335605	0.072650252	1.072363337	0.035107073	0.035511912	0.069864939	0.032941628	0.03308834	0.392518796	0.062020747	5.769652307	0.552485356	1.171689925	0.052161648	0.035047815	172	185	0.654349801	0.030822827	1.012600848	1.424492614	0.067100027	0.511068212	0.04710451	0.358772104	NO
178	2007	191	1182	A	CHR2SNP.69593(T)	POLYMORPHISM	3	NAN	NAN	NAN	NAN	NAN	x	F01	1	F	1	2	1	3	14	20832	15784	5070	3667	-0.768819463	58	5.340855759	5.94347473	0.157945133	5.46170407	0.214818694	0.915962098	0.020878844	0.020444675	0.592744048	0.054382001	0.054328486	0.914551194	0.01881928	0.01893224	5.943812351	0.158299893	0.915571034	0.061166269	0.061361266	-0.088207328	0.067130623	0.066680734	0.072541883	0.147577947	5.73021327	0.230088587	0.986519345	0.138036084	0.067187293	172	185	0.469179221	0.062962304	1.005679113	1.021383875	0.137066348	1.043967588	0.134196703	1.022110896	NO
5	103	190	1180	A	EMS.MUTANT	Y103	1	103	Y103	NAN	NAN	NAN	a	F02	2	F	1	2	1	3	14	19038	15202	5142	3927	-0.551837044	56	5.285168415	5.871958609	0.123452904	5.150314247	0.227469733	0.875392147	0.025450301	0.025687004	0.496554022	0.064516484	0.064427193	0.874193684	0.023409208	0.024093066	5.871681287	0.124117548	0.803039506	0.055494438	0.058182543	-0.219351368	0.069299249	0.071184615	-0.243053975	0.191858651	5.658082206	-0.08550727	0.854785951	0.182316788	0.064723148	170	171	0.338646625	0.060627242	1.002623261	0.901819531	0.161450985	1.029172436	0.179028042	1.141217727	NO
CTRL	1617	191	1182	A	WT	WT	1	NAN	NAN	NAN	NAN	NAN	x	F03	3	F	1	2	1	3	14	20024	15536	5432	3814	-0.719313619	57	5.309015291	5.90958384	0.13023761	5.413940672	0.198667618	0.91329758	0.020457253	0.020664834	0.563881504	0.059127019	0.05905826	0.91133314	0.018668389	0.019084004	5.909973994	0.130579708	0.905238186	0.058859332	0.060045221	-0.099557181	0.065220064	0.066120133	0.047376689	0.148093058	5.696374913	0.204923393	0.974423347	0.138551194	0.065762101	172	185	0.457083223	0.061537113	0.999740324	0.995051384	0.133963765	1.020336722	0.134629997	1.025411087	NO
160	R120	191	1182	A	RAP1.MUTANT	PLATE	1	NAN	NAN	RAP1	NAN	NAN	x	F04	4	F	1	2	1	3	14	6810	5226	1935	1430	-0.485968864	55	5.167740451	5.764417854	0.111438433	5.077845522	0.146160699	0.879765045	0.015036215	0.014966909	0.739731159	0.024292806	0.024288029	0.879396268	0.014725244	0.014706728	5.764232047	0.111126721	0.815631711	0.036572884	0.036634674	-0.203792361	0.044954166	0.044600511	-0.202369749	0.115987741	5.550632966	-0.044823045	0.869526832	0.106445878	0.039357795	182	185	0.352186709	0.035132806	0.974204713	0.770140303	0.076826267	0.596290589	0.099756196	0.774262283	NO
104	3176	191	1182	A	RAP1.MUTANT	F548	1	NAN	NAN	RAP1	NAN	NAN	x	F05	5	F	1	2	1	3	14	23332	18803	6639	5517	-0.36394404	55	5.266797998	5.836075876	0.094642384	5.351256968	0.137993261	0.915719038	0.014935407	0.015342071	0.602082634	0.053740974	0.053689328	0.91554279	0.01476829	0.014506116	5.836122855	0.094903542	0.918807712	0.048198648	0.047273557	-0.084678415	0.052739816	0.051386194	0.080296167	0.112817842	5.622523774	0.237842871	0.990308314	0.103275979	0.050659567	182	185	0.472968191	0.046434579	0.986822438	1.034257843	0.10154029	0.788109613	0.098176959	0.762004966	NO
134	3235	191	1182	A	SINGLE.SITE	ADE5_G1592A	2	1572	1P03E05	ADE5	NAN	YES	x	F06	6	F	1	2	1	3	14	14323	10619	3574	3458	0.666003423	61	5.374500767	5.965953654	0.062169384	5.649642454	0.085549499	0.947083765	0.00708066	0.007173375	0.681510466	0.044514811	0.044485443	0.947110847	0.006548668	0.006711497	5.965941755	0.062277766	1.03613606	0.027448053	0.028051781	0.035498467	0.026427696	0.027099851	0.327158478	0.052300882	5.752342674	0.484705182	1.127657036	0.042759019	0.026847313	172	185	0.610316912	0.022622324	1.009562927	1.328634825	0.04924787	0.375097031	0.037066521	0.282317627	NO
CTRL	1617	191	1182	A	WT	WT	1	NAN	NAN	NAN	NAN	NAN	x	F07	7	F	1	2	1	3	14	20390	15716	5605	3720	-0.80253416	58	5.307934786	5.908593578	0.133312594	5.411203728	0.207880431	0.91235324	0.020055024	0.02015396	0.576636917	0.056818314	0.056757289	0.911470814	0.018302824	0.018540543	5.90863668	0.133924435	0.905674941	0.058139722	0.058729687	-0.099074822	0.064450996	0.064490663	0.048453304	0.144692617	5.695037599	0.206000008	0.974934628	0.135150754	0.064217212	172	185	0.457594504	0.059992224	0.999505619	0.996164422	0.130600605	0.994721173	0.131103462	0.998551194	NO
25	1600	191	1182	A	EMS.MUTANT	1P12F03	1	1600	1P12F03	NAN	NAN	NAN	x	F08	8	F	1	2	1	3	14	15250	10482	3209	1714	-1.330826703	62	5.42257777	6.0132336	0.066256756	5.767048942	0.099607254	0.958222824	0.009413313	0.010414375	0.758291864	0.033248494	0.03323625	0.958272122	0.009160064	0.010043375	6.013255618	0.066211166	1.085053406	0.04192324	0.04514703	0.081629208	0.038616302	0.041913672	0.414439684	0.077138645	5.799656537	0.571986388	1.184921414	0.067596782	0.046313208	172	185	0.667581291	0.042088219	1.01786673	1.453297022	0.091624322	0.69785782	0.063045834	0.480189397	NO
142	3251	191	1182	A	SINGLE.SITE	NAM7_G2462A	2	2058	2P06D08	NAM7	NAN	YES	x	F09	9	F	1	2	1	3	14	19454	15183	5073	4343	-0.59602763	59	5.33714811	5.943165455	0.121566303	5.538989482	0.146622224	0.929212748	0.016170656	0.017342547	0.709552243	0.036960187	0.036943371	0.928001131	0.016696056	0.016754146	5.943078472	0.121755275	0.96168574	0.060509996	0.059817501	-0.039067555	0.06283237	0.062238902	0.177720438	0.129502142	5.729479391	0.335267142	1.040502854	0.119960279	0.064865004	172	185	0.52316273	0.060640015	1.005550314	1.138903754	0.132010819	1.00546209	0.115910426	0.882833239	NO
60	2699	191	1182	A	SINGLE.SITE	CHD1_G1277A	1	54	Y54	CHD1	NAN	YES	x	F10	10	F	1	2	1	3	14	20770	15955	5632	3332	-0.901192504	57	5.314510403	5.89575421	0.16294826	5.403612899	0.235386456	0.914475442	0.021117837	0.021263428	0.608212636	0.051946332	0.051899683	0.914102769	0.018892676	0.019628988	5.896108484	0.163645591	0.914115548	0.061316306	0.063224456	-0.089798295	0.066923326	0.068807344	0.069035202	0.152593201	5.682509403	0.226581906	0.984815502	0.143051338	0.069384667	172	185	0.467475379	0.065159678	0.997306862	1.017674679	0.14184994	1.080401878	0.139386331	1.061637771	NO
CTRL	1617	191	1182	A	WT	WT	1	NAN	NAN	NAN	NAN	NAN	x	F11	11	F	1	2	1	3	14	20781	16266	5214	4497	-0.296960046	58	5.312013903	5.911089928	0.118972117	5.422952421	0.186941178	0.915102483	0.01914635	0.018930299	0.642885338	0.046051938	0.046019424	0.913784354	0.018085483	0.018063746	5.911453647	0.119042917	0.913085138	0.058744701	0.059156211	-0.090926152	0.064273382	0.064015833	0.066545193	0.143130381	5.697854566	0.224091898	0.983609267	0.133588518	0.064633744	172	185	0.466269144	0.060408756	1.00000001	1.015048755	0.131507377	1.001627617	0.129557695	0.986777839	NO
171	880	171	880	A	NULL	NULL	1	NAN	NAN	NAN	NAN	NAN	a	F12	12	F	1	2	1	3	14	20207	16735	4518	4371	0.317905547	56	5.28248133	5.863577413	0.061476878	2.881954971	0.197785933	0.491737975	0.032262696	0.033822353	0.026794971	0.079293402	0.079127842	0.49132391	0.031918765	0.033582235	5.863333399	0.061576202	0.514970678	0.003765362	0.00382771	-0.663645316	0.007312493	0.007424979	-3.237096873	0.252013643	5.649734318	-3.079550168	0.517562375	0.24247178	0.004311197	170	171	0.001423049	0.000215291	1.001143999	0.003789594	0.000573321	0.003654647	0.151288282	0.964390088	NO
143	3253	191	1182	A	SINGLE.SITE	IRA2_G7496A	1	2157	2P17B12	IRA2	NAN	YES	x	G01	1	G	1	2	1	3	14	20042	16162	6592	5547	-0.3995877	55	5.261403021	5.818702828	0.185790846	5.249704535	0.259160587	0.900920571	0.017897167	0.017942351	0.547173658	0.060794807	0.060720073	0.8996554	0.013856062	0.014760111	5.819137471	0.186321496	0.869852267	0.040261524	0.042976638	-0.139431889	0.046133738	0.049066405	-0.04394327	0.116131077	5.599995053	0.110053886	0.931464338	0.106006986	0.045761325	172	185	0.414124214	0.041536336	0.98282521	0.901531388	0.090422897	0.688707146	0.100299222	0.763930302	NO
61	2700	191	1182	A	SINGLE.SITE	CIT2_C-385T	1	103	Y103	CIT2	NAN	YES	x	G02	2	G	1	2	1	3	14	19191	14549	5013	2949	-0.982955167	58	5.32345086	5.917877153	0.175650391	5.401431561	0.23678662	0.910436263	0.020535958	0.019865317	0.616676252	0.049639424	0.049598712	0.909809422	0.018491541	0.018218544	5.918045345	0.176073499	0.900435653	0.057469762	0.057586046	-0.104876574	0.064306479	0.063326611	0.035461211	0.143730303	5.698902927	0.189458367	0.967139477	0.133606211	0.062441839	172	185	0.449799353	0.05821685	1.000184002	0.979194698	0.126735689	0.965283991	0.129428488	0.985793727	NO
179	2008	191	1182	A	CHR2SNP.69593(PolyG_T)	POLYMORPHISM	2	NAN	NAN	NAN	NAN	NAN	x	G03	3	G	1	2	1	3	14	20252	15476	5665	3348	-0.891589107	58	5.315177455	5.921301419	0.149908491	5.431293784	0.217590705	0.913552034	0.020123587	0.020356211	0.590780639	0.054510212	0.054456318	0.912525497	0.018165901	0.018708656	5.921414043	0.15026339	0.909036434	0.058369572	0.059959638	-0.095370104	0.063931815	0.065479825	0.056700925	0.146509502	5.702271625	0.210698082	0.977172181	0.136385411	0.065109032	172	185	0.459832057	0.060884044	1.000775224	1.001035483	0.13254206	1.009508292	0.132404957	1.008464044	NO
CTRL	1617	191	1182	A	WT	WT	1	NAN	NAN	NAN	NAN	NAN	x	G04	4	G	1	2	1	3	14	19062	14970	4762	3969	-0.33283592	58	5.3114934	5.912733128	0.112336705	5.422003491	0.182472804	0.91437055	0.019147243	0.019401229	0.584484875	0.055792418	0.055734635	0.912791697	0.018341128	0.018338551	5.912427741	0.1126235	0.909889261	0.059039417	0.059081711	-0.094432378	0.06498753	0.064411246	0.058782614	0.144064107	5.693285323	0.21277977	0.978166993	0.133940016	0.06407487	172	185	0.46082687	0.059849882	0.999198087	1.003201148	0.130290732	0.992361019	0.129874983	0.989194461	NO
105	3177	191	1182	A	RAP1.MUTANT	F548	1	NAN	NAN	RAP1	NAN	NAN	x	G06	6	G	1	2	1	3	14	23291	18482	5984	4794	-0.514864657	56	5.263440564	5.836615551	0.086562655	5.345799972	0.138562729	0.915469245	0.015707794	0.016290334	0.51642935	0.068368371	0.068262145	0.915896207	0.015063673	0.015182105	5.836444359	0.086711867	0.919967384	0.049182128	0.049319237	-0.083417062	0.053857974	0.053664756	0.08305989	0.117374995	5.617301941	0.237057047	0.989922998	0.107250904	0.052568046	182	185	0.472582875	0.048343058	0.985905942	1.033415257	0.105713635	0.820501221	0.102295408	0.793970493	NO
86	2996	191	1182	A	SINGLE.SITE	ADE6_G1055A	2	1565	1P01D03	ADE6	NAN	YES	x	G07	7	G	1	2	1	3	14	14911	10429	2125	1946	-0.982314996	61	5.385081424	5.979761372	0.078254708	5.706248647	0.098120843	0.953185905	0.010193258	0.010531274	0.761254819	0.03209678	0.032085765	0.953005622	0.01020608	0.010269122	5.979949039	0.078334628	1.061439184	0.044956317	0.044881666	0.059625702	0.042173485	0.042308998	0.373255661	0.079909384	5.760806621	0.527252817	1.154948094	0.069785293	0.045720946	172	185	0.637607971	0.041495957	1.011048389	1.388046338	0.090334993	0.688037625	0.065080675	0.495687793	NO
CTRL	1617	191	1182	A	WT	WT	1	NAN	NAN	NAN	NAN	NAN	x	G08	8	G	1	2	1	3	14	19918	15472	5094	4029	-0.594118113	58	5.321362748	5.927979283	0.140439777	5.439321639	0.201421537	0.914046853	0.02001965	0.02005218	0.59547147	0.053740974	0.053689328	0.912262789	0.018599917	0.018682644	5.92846403	0.140426302	0.908196534	0.059655153	0.060156079	-0.096294477	0.065409611	0.065562719	0.054646547	0.147291784	5.709321613	0.208643703	0.976192448	0.137167692	0.065348098	172	185	0.458852324	0.061123109	1.00201253	0.998902644	0.133062496	1.013472197	0.133208673	1.014585558	NO
190	1180	190	1180	A	GFP.MATA	GFP.MATA	1	NAN	NAN	NAN	NAN	NAN	a	G09	9	G	1	2	1	3	14	21697	16191	5993	3438	-0.899950074	58	5.31800843	5.922202897	0.147422717	5.190051333	0.223146187	0.874365979	0.023685079	0.024380592	0.534078812	0.057459559	0.057396448	0.873183472	0.022184869	0.022998302	5.922597483	0.14776809	0.800653254	0.052263259	0.052971617	-0.222327318	0.065353794	0.066067149	-0.250953832	0.176060846	5.703455066	-0.096956676	0.850744549	0.165936755	0.058237558	172	185	0.333404426	0.054012569	1.000982924	0.725807727	0.117583142	0.895573501	0.162003156	1.233899101	NO
169	R65	191	1182	A	RAP1.MUTANT	PLATE	1	NAN	NAN	RAP1	NAN	NAN	x	G10	10	G	1	2	1	3	14	14224	11225	5290	2828	-0.773076699	56	5.221263418	5.828716574	0.140829219	5.140585024	0.21205543	0.880180394	0.019150684	0.020724156	0.586364506	0.050408333	0.050365703	0.8797886	0.017598094	0.019371545	5.82859226	0.141691962	0.816602235	0.043522029	0.049358127	-0.202603163	0.053524299	0.059307429	-0.199301718	0.155792302	5.609449842	-0.045304562	0.869348837	0.145668211	0.053834114	182	185	0.352008713	0.049609126	0.984527802	0.769751073	0.108482195	0.841989527	0.140931528	1.093846512	NO
28	2013	191	1182	A	EMS.MUTANT	2P01D04	1	2013	2P01D04	NAN	NAN	NAN	x	G11	11	G	1	2	1	3	14	22499	18869	6277	5392	0.202598736	56	5.268859194	5.855570638	0.075833442	5.371633921	0.117343721	0.916810992	0.013462254	0.013578658	0.637398365	0.047717403	0.047681236	0.916634708	0.013080824	0.013037731	5.855626818	0.075916435	0.922401009	0.043120507	0.042820519	-0.080775216	0.046654214	0.046411514	0.088834975	0.101321842	5.636484401	0.242832131	0.992761792	0.091197751	0.044958633	172	185	0.475421669	0.040733644	0.98922926	1.034973426	0.088675468	0.675397835	0.085678981	0.65257505	NO
64	2794	191	1182	A	SINGLE.SITE	SDS23_G676A	1	1487	1P07H05	SDS23	NAN	YES	x	H01	1	H	1	2	1	3	14	22167	16906	6101	3947	-0.893974901	57	5.325933576	5.911988102	0.167739365	5.467920212	0.229105751	0.921719975	0.020174509	0.020415839	0.595666193	0.055151292	0.055095477	0.920425674	0.017647441	0.01836235	5.912432921	0.166804873	0.935117257	0.060085502	0.062421602	-0.067083349	0.064055534	0.066371827	0.11848034	0.143387484	5.690243847	0.272859728	1.007789276	0.13102622	0.06656225	172	185	0.490449152	0.062337262	0.998664293	1.06768764	0.135705656	1.033603862	0.127102395	0.968077013	NO
CTRL	1617	191	1182	A	WT	WT	1	NAN	NAN	NAN	NAN	NAN	x	H02	2	H	1	2	1	3	14	20019	15369	5002	3479	-0.791093317	58	5.325032449	5.931600747	0.154247157	5.436698424	0.217674948	0.913793731	0.020438861	0.019937018	0.623152944	0.04899871	0.048959553	0.912882433	0.018619869	0.018645069	5.931379193	0.154127546	0.910180359	0.059427274	0.059834395	-0.094112503	0.065549055	0.065327434	0.059492171	0.145795953	5.70919012	0.213871559	0.978689574	0.13343469	0.06390286	172	185	0.46134945	0.059677872	1.001989452	1.004338785	0.129916273	0.989508952	0.12935503	0.985234232	NO
31	2038	191	1182	A	EMS.MUTANT	2P04A04	1	2038	2P04A04	NAN	NAN	NAN	x	H03	3	H	1	2	1	3	14	15303	10981	2194	1999	-1.004267687	61	5.406538562	5.984498059	0.079061562	5.730744334	0.110278174	0.957293315	0.00913354	0.009656175	0.641817968	0.052715423	0.052666674	0.957014355	0.008400808	0.008844316	5.984580738	0.079187089	1.079325048	0.038312948	0.039862161	0.07633589	0.035426727	0.036983418	0.404603945	0.068782074	5.762391664	0.558983334	1.176070182	0.056420811	0.038156718	172	185	0.658730059	0.033931729	1.011326571	1.434028255	0.073867979	0.562616405	0.051510825	0.392332859	NO
100	3161	191	1182	A	SINGLE.SITE	FTR1_G853A	1	2200	2P01A08	FTR1	NAN	YES	x	H04	4	H	1	2	1	3	14	20147	15836	5376	4478	-0.357948362	57	5.30747195	5.906937555	0.123250858	5.382286346	0.20024124	0.908065821	0.020856122	0.020549035	0.550470442	0.060538202	0.060464409	0.906067134	0.018833429	0.019114575	5.907055301	0.123199819	0.88888055	0.057276811	0.058821934	-0.117792417	0.064441654	0.065412312	0.006196505	0.151174967	5.684866227	0.160575894	0.953834112	0.138813704	0.063028631	172	185	0.436493989	0.058803643	0.997720496	0.950229468	0.128013113	0.975013504	0.134718104	1.02608216	NO
170	629	170	629	A	WT	WT	1	NAN	NAN	NAN	NAN	NAN	a	H05	5	H	1	2	1	3	14	20831	16849	5258	4684	0.149112688	56	5.282766875	5.862730805	0.071822449	5.202245764	0.177724227	0.886980864	0.023983044	0.023976034	0.075455901	0.138420983	0.137546944	0.887479845	0.021351486	0.021817268	5.862871133	0.073146286	0.836242266	0.056418811	0.056549494	-0.178836916	0.067546878	0.067445543	-0.139156156	0.16807192	5.640682059	0.015223232	0.892408734	0.155710657	0.06113614	170	171	0.376269408	0.057040233	0.99953992	1.0020094	0.151898742	0.968281482	0.151594129	0.966339719	NO
CTRL	1617	191	1182	A	WT	WT	1	NAN	NAN	NAN	NAN	NAN	x	H06	6	H	1	2	1	3	14	21697	16602	5961	3537	-0.905318124	57	5.332020878	5.909943619	0.161668324	5.401197133	0.228309334	0.912226074	0.020508227	0.020624758	0.595377601	0.053612774	0.053561496	0.911429674	0.018417812	0.018948121	5.909999662	0.161505305	0.905544381	0.058605776	0.060163664	-0.09921899	0.064472411	0.065970817	0.048131591	0.148273207	5.687810588	0.202510979	0.973279696	0.135911943	0.064353968	172	185	0.455939572	0.06012898	0.998237245	0.992561703	0.130898317	0.996988698	0.131879274	1.004460171	NO
2	89	190	1180	A	EMS.MUTANT	Y89	1	89	Y89	NAN	NAN	NAN	a	H08	8	H	1	2	1	3	14	22865	18750	7023	6497	0.254725232	55	5.269864611	5.827625767	0.089553624	5.249870687	0.180612365	0.900914751	0.019779163	0.019698737	0.15414647	0.1281428	0.127448237	0.90080818	0.015614986	0.01643061	5.827747929	0.091074028	0.873203435	0.045812393	0.047838731	-0.135586721	0.05239845	0.054546604	-0.034928532	0.128109285	5.605558855	0.119450857	0.935539962	0.115748022	0.050438102	170	171	0.419400636	0.046342196	0.99331602	1.116868313	0.123409755	0.78667788	0.110496245	0.704360461	NO
CTRL	1617	191	1182	A	WT	WT	1	NAN	NAN	NAN	NAN	NAN	x	H10	10	H	1	2	1	3	14	21298	16808	5401	4609	-0.363637704	58	5.315649586	5.924154667	0.134590766	5.428635241	0.195730619	0.913185687	0.019655806	0.019084843	0.618354897	0.049767571	0.049726544	0.911287927	0.017984636	0.017962682	5.924074318	0.13456114	0.905094858	0.056915567	0.057894618	-0.099715526	0.063184383	0.06312618	0.047023128	0.142839395	5.701885244	0.201402516	0.972755132	0.130478131	0.061712628	172	185	0.455415009	0.057487639	1.000707413	0.991419749	0.125148227	0.953193065	0.126231323	0.961442482	NO
125	3221	191	1182	A	SINGLE.SITE	ADE5_G713A	1	1611	1P15H09	ADE5	NAN	YES	x	H12	12	H	1	2	1	3	14	15170	11001	2015	1935	-0.997383647	61	5.376822488	5.973341252	0.061422195	5.658276665	0.088979645	0.947409883	0.010505989	0.010831826	0.80459274	0.023909088	0.023904534	0.94740733	0.010193612	0.010749626	5.973338116	0.061470844	1.037381037	0.042813005	0.044818077	0.036699304	0.04144882	0.043293064	0.329476975	0.083367136	5.751149042	0.483856364	1.12712431	0.071005872	0.044544975	172	185	0.609784187	0.040319987	1.009353439	1.327475103	0.087774954	0.668539054	0.066121732	0.503617019	NO
CTRL	1617	191	1182	A	WT	WT	1	NAN	NAN	NAN	NAN	NAN	x	A01	1	A	2	2	1	3	15	21966	16904	6344	3731	-0.845402429	57	5.293204642	5.886416832	0.165711669	5.375480715	0.24088255	0.912812458	0.021351659	0.021616895	0.60778919	0.051818156	0.051771852	0.912619151	0.0191286	0.020019874	5.885969154	0.165545209	0.909336271	0.061498358	0.063701679	-0.095040318	0.067703789	0.06971715	0.0574333	0.155539109	5.666376846	0.219185069	0.981241026	0.14197192	0.068353638	172	185	0.463900902	0.064128649	0.994475523	1.009893191	0.139605433	1.063306557	0.138237819	1.052890114	NO
173	2002	191	1182	A	CHR2SNP.69593(T_G)	POLYMORPHISM	1	NAN	NAN	NAN	NAN	NAN	x	A02	2	A	2	2	1	3	15	22242	17549	6167	5170	-0.265420142	58	5.296679869	5.902688079	0.138980821	5.417602875	0.215998248	0.915552277	0.021702582	0.021490685	0.533216187	0.064773216	0.064682857	0.91334401	0.019862609	0.019742882	5.902637022	0.138929177	0.911664382	0.063544831	0.064777468	-0.092483359	0.070127709	0.069957157	0.063101706	0.157271829	5.683044714	0.224853476	0.98397788	0.14370464	0.06958117	172	185	0.466637756	0.065356181	0.997400812	1.015851209	0.142277719	1.083660061	0.140057636	1.066750771	NO
58	2691	191	1182	A	EXTRA.MUTATION	NAR1_G536A_G624T	1	1513	1P12H01	NAR1	NAN	YES	x	A03	3	A	2	2	1	3	15	21964	17276	6378	4537	-0.632881019	58	5.305383086	5.908680139	0.146840153	5.372785008	0.228125058	0.906916672	0.023510279	0.022701204	0.503708679	0.068239942	0.068134313	0.904883757	0.020730852	0.020623654	5.908700118	0.146857492	0.885296438	0.062164129	0.062998105	-0.121832732	0.070588272	0.070202701	-0.003057507	0.163413162	5.689107809	0.158694262	0.952980557	0.149845973	0.067909953	172	185	0.435640434	0.063684964	0.998464913	0.948371313	0.138639549	1.055949891	0.146186991	1.113435082	NO
149	3263	191	1182	A	SINGLE.SITE	NAM7_G2463	1	2142	2P15E04	NAM7	NAN	YES	x	A04	4	A	2	2	1	3	15	22245	16721	6392	3906	-0.98792313	58	5.34743811	5.927957239	0.161263036	5.505609131	0.214224279	0.925141264	0.019471036	0.020068001	0.590605363	0.056433589	0.056373794	0.924160498	0.017259357	0.018009004	5.927799653	0.161259545	0.948019291	0.060319356	0.06308026	-0.053380428	0.063809689	0.066151189	0.147686672	0.140729666	5.708207344	0.309438442	1.026715562	0.127162477	0.067006155	172	185	0.509375438	0.062781166	1.001816971	1.108889386	0.136672017	1.040964163	0.123251263	0.938744816	NO
CTRL	1617	191	1182	A	WT	WT	1	NAN	NAN	NAN	NAN	NAN	x	A05	5	A	2	2	1	3	15	20076	15639	5353	3859	-0.711787904	58	5.330388197	5.930885894	0.157156768	5.430291181	0.220331417	0.913726301	0.020584908	0.02005333	0.594234364	0.053869176	0.053817159	0.9127183	0.018312975	0.018514353	5.931392428	0.157842443	0.909653941	0.058320951	0.059905751	-0.094691037	0.064405539	0.065160094	0.058208647	0.146157301	5.71180012	0.219960417	0.981614468	0.132590111	0.063886198	172	185	0.464274345	0.059661209	1.00244752	1.01070616	0.129879999	0.98923267	0.128504212	0.978753973	NO
177	2006	191	1182	A	CHR2SNP.69593(PolyG_T)	POLYMORPHISM	1	NAN	NAN	NAN	NAN	NAN	x	A07	7	A	2	2	1	3	15	20695	16131	5092	4388	-0.356593047	58	5.315983906	5.927166001	0.133958986	5.432493063	0.199455816	0.913909367	0.020092123	0.019312561	0.618928711	0.049767571	0.049726544	0.91214527	0.018735801	0.018272368	5.92727028	0.134105403	0.907821376	0.059744362	0.058934125	-0.096707642	0.065908682	0.064220142	0.053727555	0.144432507	5.707677972	0.215479324	0.979460164	0.130865318	0.062773213	172	185	0.46212004	0.058548224	1.001724063	1.006016328	0.127457077	0.970778451	0.126694839	0.964972859	NO
109	3187	191	1182	A	SINGLE.SITE	DSE3_G249A	2	2182	2P19F12	DSE3	C	NO	x	A08	8	A	2	2	1	3	15	19986	15176	5366	3612	-0.699514851	57	5.29557755	5.867918637	0.154650359	5.329714075	0.213205598	0.908712917	0.019227562	0.020043571	0.659528031	0.042465634	0.042440135	0.908090437	0.01806596	0.018844638	5.867688009	0.15480763	0.895085921	0.055569695	0.058712906	-0.110835565	0.062362974	0.064905542	0.02201875	0.148526055	5.648095701	0.183770519	0.964488765	0.134958866	0.062716274	172	185	0.447148641	0.058491286	0.991267097	0.973424208	0.127333125	0.969834368	0.13080949	0.996312152	NO
CTRL	1617	191	1182	A	WT	WT	1	NAN	NAN	NAN	NAN	NAN	x	A09	9	A	2	2	1	3	15	21914	17298	6208	5191	-0.217901074	58	5.304400956	5.914700602	0.136907565	5.415280586	0.204447967	0.911648119	0.020223127	0.019784165	0.608949697	0.051177303	0.051132693	0.909458466	0.018784284	0.018620086	5.914771323	0.137333296	0.899337577	0.058339178	0.059163025	-0.106096812	0.065329984	0.064889528	0.032716737	0.148072144	5.695179015	0.194468506	0.969486877	0.134504955	0.06317761	172	185	0.452146754	0.058952621	0.999530438	0.984304893	0.128337433	0.977483696	0.130383821	0.993070037	NO
97	3104	191	1182	A	RAP1.MUTANT	P589.SMALL	1	NAN	NAN	RAP1	NAN	NAN	x	A10	10	A	2	2	1	3	15	22176	17590	5288	4360	-0.552577289	57	5.318089945	5.922718453	0.146255869	5.424661981	0.200296852	0.912253721	0.020819399	0.020418999	0.620530277	0.049254991	0.049215217	0.910883685	0.019637213	0.019314037	5.923055295	0.146601796	0.903815615	0.061911322	0.0612874	-0.101129905	0.068708031	0.067242832	0.043861949	0.15168893	5.703462987	0.205613719	0.974751117	0.138121741	0.065603537	182	185	0.457410993	0.061378549	1.001028271	1.000238317	0.134218848	1.041745734	0.134186869	1.041497527	NO
40	2154	191	1182	A	EMS.MUTANT	2P16H09	1	2154	2P16H09	NAN	NAN	NAN	x	A12	12	A	2	2	1	3	15	22627	17564	6362	4729	-0.635377327	57	5.313533739	5.913105693	0.161605942	5.295846278	0.251787846	0.89415654	0.025279871	0.024277089	0.478494396	0.070295064	0.070179621	0.892470442	0.022159473	0.022007943	5.913028311	0.161663695	0.849632712	0.060363885	0.060087468	-0.162951126	0.071219641	0.070186025	-0.10012967	0.171751824	5.693436003	0.061622099	0.911055409	0.158184635	0.065057106	172	185	0.393715286	0.060832118	0.999224532	0.857101989	0.13242902	1.008647317	0.15450789	1.176811313	NO
57	2690	191	1182	A	SINGLE.SITE	NAR1_G536A	1	1513	1P12H01	NAR1	NAN	YES	x	B01	1	B	2	2	1	3	15	21525	16817	6205	4775	-0.521811618	58	5.304084118	5.913420691	0.143711599	5.387948354	0.217901442	0.908269363	0.022306934	0.021872371	0.584411189	0.054766639	0.054711981	0.905910248	0.02022285	0.020545156	5.913596253	0.143617441	0.888403478	0.061654391	0.06277952	-0.118329273	0.069309253	0.069963407	0.004969657	0.161544205	5.69986886	0.170779417	0.958490759	0.154183331	0.070725218	172	185	0.441150635	0.066500229	1.000353528	0.960366795	0.144768265	1.102629333	0.15074268	1.148133546	NO
CTRL	1617	191	1182	A	WT	WT	1	NAN	NAN	NAN	NAN	NAN	x	B03	3	B	2	2	1	3	15	20366	15587	5062	3906	-0.625775299	58	5.327246423	5.930764429	0.145839956	5.438756658	0.201920139	0.914463494	0.020270348	0.019757746	0.621583763	0.049383133	0.049343049	0.912653913	0.018564227	0.018589006	5.930839656	0.145708714	0.90944762	0.059505356	0.060465097	-0.094917874	0.065479817	0.065621807	0.057705142	0.147596284	5.717112263	0.223514902	0.983330182	0.14023541	0.067810553	172	185	0.465990058	0.063585564	1.003379825	1.014441198	0.13842316	1.05430176	0.13645262	1.039293123	NO
78	2917	191	1182	A	SINGLE.SITE	ADE6_G2801A	1	2021	2P02B11	ADE6	NAN	YES	x	B04	4	B	2	2	1	3	15	21371	16063	4757	4634	0.647792816	58	5.359396122	5.940485354	0.070567509	5.551393262	0.114362135	0.9338766	0.011655957	0.011591537	0.463599453	0.079164768	0.079000011	0.933844032	0.010174815	0.010337486	5.940402222	0.070831622	0.983280397	0.03813138	0.039065573	-0.016860953	0.039064542	0.039662613	0.223411941	0.080797759	5.726674828	0.3892217	1.070478591	0.073436885	0.041910167	172	185	0.553138468	0.037685179	1.0050581	1.204159703	0.082039084	0.624851732	0.068129737	0.518911014	NO
16	1523	191	1182	A	EMS.MUTANT	1P16A09	1	1523	1P16A09	NAN	NAN	NAN	x	B05	5	B	2	2	1	3	15	18623	15140	4449	4135	0.572624833	57	5.298978913	5.881435445	0.066719698	5.401152302	0.162425974	0.918110886	0.024264978	0.021901669	0.499385825	0.071194365	0.071074443	0.918567643	0.023643319	0.021454346	5.881950753	0.066929681	0.928837651	0.079393693	0.073420636	-0.073821312	0.085595356	0.077768063	0.103950528	0.171121545	5.66822336	0.269760288	1.006217176	0.163760671	0.082934136	172	185	0.488877052	0.078709147	0.994799595	1.064265243	0.171346577	1.305063391	0.160999881	1.226257645	NO
122	3209	191	1182	A	SINGLE.SITE	ADE5_G479A	1	2146	2P15G08	ADE5	NAN	YES	x	B06	6	B	2	2	1	3	15	14536	10586	2289	2170	-0.772810993	60	5.358756759	5.954357582	0.066857159	5.632329661	0.094291454	0.945663314	0.010362248	0.010420241	0.774356008	0.028770074	0.02876214	0.945578783	0.009962381	0.010274418	5.954336116	0.066590115	1.029748481	0.041381869	0.04241286	0.029314579	0.04021481	0.041188642	0.315177733	0.080029351	5.740608723	0.480987492	1.125327125	0.072668477	0.045457399	172	185	0.607987002	0.041232411	1.007503564	1.323562706	0.089761263	0.683667803	0.067817915	0.516536013	NO
CTRL	1617	191	1182	A	WT	WT	1	NAN	NAN	NAN	NAN	NAN	x	B07	7	B	2	2	1	3	15	19397	14949	4898	4016	-0.387383216	58	5.315614505	5.92236469	0.13212643	5.42325402	0.194800934	0.912840311	0.019576586	0.019427444	0.605195187	0.051946332	0.051899683	0.911314286	0.018266936	0.018240481	5.923027043	0.133055593	0.905178411	0.058083674	0.058495986	-0.099623216	0.063913018	0.063906331	0.047229252	0.144293363	5.70929965	0.213039012	0.978291027	0.136932489	0.065523408	172	185	0.460950903	0.06129842	1.002008675	1.003471164	0.133444139	1.016378988	0.132982535	1.012863174	NO
145	3256	191	1182	A	SINGLE.SITE	MRN1_G1664A	1	2175	2P18H11	MRN1	NAN	YES	x	B08	8	B	2	2	1	3	15	20163	16277	6205	4849	-0.319693864	57	5.290656753	5.899481796	0.12698673	5.319162295	0.178899413	0.898899851	0.017634499	0.018726252	0.601516805	0.050408333	0.050365703	0.89751479	0.017275551	0.017593717	5.899780631	0.127169888	0.86370901	0.049427665	0.050364225	-0.146519361	0.056883365	0.057822583	-0.060682852	0.138391072	5.686053237	0.105126908	0.92934268	0.131030198	0.056285398	172	185	0.412002557	0.05206041	0.997928822	0.896912627	0.113333372	0.86320507	0.126359434	0.962418238	NO
19	1575	191	1182	A	EMS.MUTANT	1P04G01	1	1575	1P04G01	NAN	NAN	NAN	x	B09	9	B	2	2	1	3	15	19923	15071	4783	4070	-0.649231659	59	5.357922527	5.961889287	0.130833293	5.548644268	0.160534715	0.928011612	0.017243454	0.018370178	0.670255095	0.043234033	0.043207126	0.927122593	0.017346871	0.017546028	5.961926306	0.130716591	0.958523259	0.062091521	0.062651644	-0.04236145	0.065077749	0.065140379	0.170850267	0.136572994	5.748198912	0.336660027	1.04125654	0.12921212	0.069965051	172	185	0.523916417	0.065740062	1.008835677	1.140544498	0.143113413	1.090025134	0.125478149	0.955705924	NO
CTRL	1617	191	1182	A	WT	WT	1	NAN	NAN	NAN	NAN	NAN	x	B11	11	B	2	2	1	3	15	21298	16756	5707	4877	-0.109903085	58	5.312563385	5.91579121	0.118539168	5.413805867	0.176681532	0.911882067	0.018450747	0.01870619	0.655360913	0.043362104	0.043334957	0.91060152	0.018010467	0.017986067	5.915848407	0.118488678	0.902925087	0.05662812	0.057131101	-0.102115689	0.062936761	0.062697368	0.041655422	0.141714265	5.702121013	0.207465182	0.975631319	0.134353391	0.063931946	172	185	0.458291195	0.059706957	1.000748791	0.99768109	0.129979592	0.989991217	0.130281703	0.992292254	NO
170	629	170	629	A	WT	WT	1	NAN	NAN	NAN	NAN	NAN	a	B12	12	B	2	2	1	3	15	20485	16697	5357	4755	0.030073951	56	5.295618656	5.877978588	0.077717018	5.25329438	0.172407029	0.891377708	0.022471394	0.022596541	0.348084701	0.092428545	0.092166679	0.890817246	0.021107062	0.021109158	5.877926681	0.077923601	0.845138955	0.057194018	0.056323253	-0.168254222	0.067633091	0.066446986	-0.11305767	0.163087149	5.664199288	0.052752089	0.907423543	0.155726275	0.063480472	170	171	0.391284216	0.059384565	1.00370722	1.041993992	0.158141723	1.008077487	0.151768364	0.967450383	NO
186	1177	190	1180	A	DELETION	CIS	1	NAN	NAN	NAN	NAN	NAN	a	C01	1	C	2	2	1	3	15	20131	15973	5570	4983	0.081516322	58	5.322626401	5.923794571	0.114062931	5.501675331	0.166277672	0.926258651	0.016847754	0.016865793	0.671666434	0.042977894	0.042951462	0.924625896	0.016315282	0.016131869	5.923986791	0.114265548	0.949653586	0.056994211	0.057106021	-0.051658007	0.060254508	0.059668676	0.151326092	0.126938541	5.708339116	0.311776567	1.027949039	0.117006375	0.06179889	172	185	0.510608916	0.057573902	1.001840097	1.111574617	0.125336017	0.954623372	0.112755379	0.858802781	NO
144	3254	191	1182	A	SINGLE.SITE	IRA2_G7496A	2	2157	2P17B12	IRA2	NAN	YES	x	C02	2	C	2	2	1	3	15	20534	16337	6356	5061	-0.351588331	56	5.264516003	5.821418537	0.177792843	5.232299665	0.245962138	0.899020405	0.017451196	0.017543525	0.557804245	0.05861392	0.058546933	0.898338666	0.013959376	0.014791987	5.821117274	0.178198351	0.866061255	0.039870293	0.042989878	-0.14379964	0.045941586	0.049118573	-0.054240141	0.117369187	5.605469599	0.106210335	0.92980833	0.107437021	0.046200729	172	185	0.412468206	0.041975741	0.983786018	0.897926327	0.091379462	0.695992836	0.101767215	0.775111293	NO
CTRL	1617	191	1182	A	WT	WT	1	NAN	NAN	NAN	NAN	NAN	x	C04	4	C	2	2	1	3	15	20710	16368	5924	4576	-0.527951625	58	5.317131198	5.917710005	0.135101537	5.427296997	0.194551861	0.914020914	0.019673779	0.019485973	0.605859067	0.05207451	0.052027515	0.912341445	0.018342465	0.018201743	5.918298364	0.135726136	0.908447825	0.058938108	0.05847535	-0.096017823	0.064680217	0.063825906	0.055261643	0.143088488	5.702650689	0.215712119	0.979571843	0.133156322	0.063887028	172	185	0.46223172	0.059662039	1.000841752	1.006259449	0.129881806	0.989246434	0.129073875	0.983092814	NO
170	629	190	1180	A	WT	WT	1	NAN	NAN	NAN	NAN	NAN	a	C05	5	C	2	2	1	3	15	20963	16970	5346	4739	-0.064564848	56	5.284404717	5.863498922	0.078149005	5.208099914	0.172123186	0.886565932	0.022070732	0.023133208	0.253761974	0.107922585	0.107506487	0.886885695	0.020755032	0.021291199	5.864015296	0.078887138	0.834682614	0.054222452	0.055204532	-0.180703729	0.064808158	0.065830289	-0.143802405	0.164838636	5.648367621	0.01664807	0.892968562	0.15490647	0.060907115	170	171	0.376829236	0.056811209	1.000901817	1.003500227	0.151288848	0.964393702	0.15076115	0.961029879	NO
47	2479	191	1182	A	SINGLE.SITE	ECM23_G130A	1	123	Y123	ECM23	NAN	YES	x	C06	6	C	2	2	1	3	15	19877	15653	5185	4725	0.119887871	58	5.3193142	5.918861938	0.109964787	5.421501921	0.162948085	0.913551897	0.017421464	0.017467481	0.689485914	0.037856261	0.037838193	0.912461882	0.017000408	0.016965212	5.919074291	0.110121721	0.908832895	0.054510399	0.054784489	-0.095594036	0.060018168	0.059719826	0.05620346	0.133930797	5.703426616	0.216653936	0.98002393	0.123998632	0.059549321	172	185	0.462683806	0.055324332	1.000977931	1.007243624	0.120438796	0.917323628	0.119572657	0.910726667	NO
154	3272	191	1182	A	OFF.TARGET	TUP1_T2098del	2	94	Y94	TUP1	NAN	YES	x	C07	7	C	2	2	1	3	15	19219	14616	4722	4256	-0.150721444	58	5.326263287	5.931346465	0.120309858	5.460930145	0.171121462	0.917573414	0.018557163	0.018196917	0.687719526	0.038752396	0.038733015	0.916414565	0.018259941	0.017623091	5.931499737	0.12006969	0.921674087	0.060131015	0.058867102	-0.081563603	0.065093495	0.063165196	0.087113451	0.13953124	5.715852062	0.247563926	0.995099998	0.129599074	0.064192731	172	185	0.477759875	0.059967743	1.003158654	1.040063605	0.130547311	0.994315257	0.125518584	0.956013894	NO
CTRL	1617	191	1182	A	WT	WT	1	NAN	NAN	NAN	NAN	NAN	x	C08	8	C	2	2	1	3	15	20304	16109	5482	4834	-0.012833501	58	5.309006637	5.910837761	0.120455677	5.412930706	0.17481363	0.913303531	0.019036851	0.018667163	0.64564101	0.045283348	0.045252433	0.911778998	0.017874811	0.017897609	5.911076276	0.120465397	0.906654321	0.056785769	0.05776108	-0.097994025	0.062617487	0.062931569	0.050863301	0.14196371	5.695428601	0.211313777	0.977466198	0.132031545	0.06306936	172	185	0.460126075	0.058844371	0.999574242	1.001675547	0.128101776	0.975688813	0.127887495	0.974056736	NO
164	R252	191	1182	A	RAP1.MUTANT	PLATE	1	NAN	NAN	RAP1	NAN	NAN	x	C09	9	C	2	2	1	3	15	15077	11392	4663	2719	-0.537475455	55	5.203426801	5.778014426	0.144699285	5.238138977	0.201893792	0.904247609	0.015297312	0.016342064	0.638158849	0.046051938	0.046019424	0.903225904	0.013647904	0.014859684	5.777959337	0.145236686	0.880330729	0.040448882	0.044295093	-0.127457613	0.045917826	0.050040834	-0.016021922	0.116398007	5.562311662	0.144428554	0.946561258	0.106465841	0.047566711	182	185	0.429221135	0.043341722	0.976254468	0.938594463	0.094777021	0.735616194	0.100977606	0.783742312	NO
44	2200	191	1182	A	EMS.MUTANT	2P01A08	1	2200	2P01A08	NAN	NAN	NAN	x	C10	10	C	2	2	1	3	15	21718	18480	5647	4791	-0.15260424	56	5.278983156	5.874139582	0.086161226	5.270564717	0.133944297	0.896301927	0.015664255	0.016737889	0.630301222	0.045283348	0.045252433	0.896323102	0.015473086	0.016230236	5.87461709	0.08641973	0.860333328	0.043491756	0.044793746	-0.150435374	0.050568366	0.052254932	-0.070001855	0.124236869	5.658969415	0.09044862	0.923083517	0.114304703	0.048385334	172	185	0.405743393	0.044160346	0.993175485	0.883286685	0.096135257	0.732215412	0.108838114	0.828966885	NO
87	2997	191	1182	A	SINGLE.SITE	ADE6_G1361A	2	2038	2P04A04	ADE6	NAN	YES	x	C11	11	C	2	2	1	3	15	15408	11237	2473	2229	-0.916046962	61	5.411104257	5.986172711	0.082342507	5.73650327	0.12021501	0.95713595	0.009959217	0.010164454	0.563244415	0.065800229	0.06570551	0.957119411	0.008569961	0.008816645	5.9863338	0.082272373	1.07980136	0.038624164	0.039841514	0.076777098	0.036017651	0.036914025	0.405425482	0.068689993	5.770686125	0.565875958	1.180747683	0.058757827	0.040012054	172	185	0.66340756	0.035787065	1.012782288	1.444210982	0.077906969	0.593379424	0.053944313	0.410867547	NO
CTRL	1617	191	1182	A	WT	WT	1	NAN	NAN	NAN	NAN	NAN	x	C12	12	C	2	2	1	3	15	21517	16638	5935	3962	-0.79769607	58	5.314093891	5.919172001	0.156905898	5.42341628	0.227772197	0.912879283	0.02167921	0.02115702	0.575802806	0.056946559	0.056885121	0.911019152	0.019132038	0.019513338	5.919130303	0.157137364	0.904243856	0.060796424	0.062761664	-0.100656203	0.0672689	0.068390185	0.044921303	0.155173325	5.703482629	0.205371779	0.974636217	0.14524116	0.068968352	172	185	0.457296093	0.064743363	1.000987761	0.995514793	0.14094364	1.073499031	0.141578649	1.078335589	NO
136	3242	191	1182	A	SINGLE.SITE	CAF40_G674A	2	2037	2P03H11	CAF40	NAN	YES	x	D01	1	D	2	2	1	3	15	21412	16608	5303	4453	-0.512281248	58	5.317319198	5.925890422	0.143549556	5.431725526	0.190594482	0.913851387	0.019737646	0.019724977	0.647784403	0.044899073	0.044868938	0.912634225	0.019005213	0.018792277	5.925751847	0.143433306	0.909384554	0.061517486	0.060242253	-0.094987222	0.067457377	0.065804761	0.057551185	0.147074958	5.714453211	0.219492096	0.981388869	0.140074033	0.067460592	172	185	0.464048746	0.063235604	1.002913149	1.01021504	0.137661309	1.048499119	0.136269313	1.037896959	NO
CTRL	1617	191	1182	A	WT	WT	1	NAN	NAN	NAN	NAN	NAN	x	D02	2	D	2	2	1	3	15	20153	16065	5415	4463	-0.379476462	57	5.309897463	5.91337669	0.131365494	5.420553112	0.192358666	0.913866478	0.019182036	0.019090493	0.627149499	0.048486169	0.048448227	0.912437704	0.017843537	0.018041592	5.913842941	0.131475953	0.908755561	0.057235056	0.058302448	-0.095679131	0.062863865	0.063484242	0.056014386	0.142558048	5.702544305	0.217955297	0.980649305	0.135557123	0.065184965	172	185	0.463309182	0.060959976	1.000823081	1.00860504	0.132707362	1.010767318	0.131575153	1.00214383	NO
184	2706	191	1182	A	RAP1.PAM.INS	RAP1.CONTROL	2	NAN	NAN	NAN	NAN	NAN	x	D04	4	D	2	2	1	3	15	21298	16291	5854	3462	-0.883013417	58	5.317636625	5.918075964	0.150218189	5.418268965	0.208148128	0.912652604	0.020266953	0.020545451	0.600678726	0.052715423	0.052666674	0.911572832	0.01875273	0.019132549	5.918482017	0.150509981	0.905998883	0.059738896	0.060979985	-0.098717206	0.065999949	0.066754389	0.049251084	0.150116879	5.707183381	0.211191996	0.977408029	0.143115954	0.06835588	182	185	0.460067905	0.064130891	1.001681246	1.006048289	0.140237502	1.088459794	0.139394404	1.081916052	NO
21	1581	191	1182	A	EMS.MUTANT	1P06E01	1	1581	1P06E01	NAN	NAN	NAN	x	D05	5	D	2	2	1	3	15	15923	11385	2644	2570	-0.585040873	61	5.408399641	5.996700317	0.062306081	5.69479686	0.102343783	0.94977342	0.010870077	0.010830795	0.545179524	0.067469421	0.067367323	0.949741065	0.009793028	0.010121059	5.996866212	0.062365279	1.047282191	0.042155608	0.043238869	0.046198418	0.040178025	0.041254834	0.347726792	0.078975101	5.785567576	0.509667704	1.143527637	0.071974177	0.04633305	172	185	0.626187513	0.042108061	1.015394052	1.363184471	0.091667518	0.698186818	0.067245131	0.512173395	NO
CTRL	1617	191	1182	A	WT	WT	1	NAN	NAN	NAN	NAN	NAN	x	D06	6	D	2	2	1	3	15	19424	15449	5245	4737	0.321255656	57	5.30100331	5.895109144	0.098354316	5.383260479	0.158846509	0.911333473	0.017700178	0.017879119	0.616437293	0.050023871	0.049982207	0.910503911	0.017231864	0.017151456	5.895504516	0.098538128	0.902617483	0.053959408	0.055043632	-0.102456422	0.060125653	0.060153244	0.040892117	0.136640535	5.68420588	0.202833029	0.97343221	0.129639611	0.061403806	172	185	0.456092087	0.057178818	0.997604602	0.99289372	0.124475935	0.948072548	0.125366827	0.954858036	NO
15	1513	191	1182	A	EMS.MUTANT	1P12H01	1	1513	1P12H01	NAN	NAN	NAN	x	D07	7	D	2	2	1	3	15	19326	15710	5250	4435	-0.030343788	57	5.29854775	5.88639596	0.092675447	5.30947473	0.161282359	0.900051691	0.019136698	0.018707617	0.568616101	0.056305351	0.056245962	0.899648585	0.017765545	0.017915357	5.886734536	0.092531869	0.869832544	0.051244546	0.052658006	-0.139454564	0.058951068	0.059784836	-0.043996568	0.142299562	5.6754359	0.117944344	0.934883981	0.135298637	0.058868682	172	185	0.417543858	0.054643693	0.99606543	0.908975811	0.118957073	0.906038064	0.130869349	0.996768069	NO
182	2702	191	1182	A	RAP1.PAM.MUT	RAP1.CONTROL	2	NAN	NAN	NAN	NAN	NAN	x	D08	8	D	2	2	1	3	15	19657	16110	5751	4923	-0.055407639	57	5.295202349	5.898145736	0.094939089	5.381638447	0.151494146	0.910717955	0.017626295	0.017469314	0.674599271	0.040032697	0.040011332	0.909746455	0.017121744	0.01699509	5.898526762	0.094838237	0.900238419	0.053809219	0.053751268	-0.10509564	0.059847941	0.059145602	0.034968811	0.13422507	5.687228126	0.196909722	0.970634928	0.127224145	0.059903839	182	185	0.453294805	0.055678851	0.998178852	0.991237289	0.121755097	0.945007764	0.122831434	0.953361798	NO
79	2918	191	1182	A	SINGLE.SITE	ADE6_G2801A	2	2021	2P02B11	ADE6	NAN	YES	x	D09	9	D	2	2	1	3	15	20978	15563	4515	4384	0.374105587	59	5.365953369	5.947122104	0.076318217	5.555691646	0.122107824	0.933940501	0.012344978	0.012267309	0.497547458	0.073378861	0.073247583	0.933935729	0.011043229	0.011120711	5.947372162	0.0767062	0.983627226	0.042147605	0.042244928	-0.01650829	0.042636174	0.042764889	0.224129015	0.087310862	5.736073526	0.386069926	1.068682717	0.080309937	0.045688367	172	185	0.551342593	0.041463378	1.006707615	1.200250157	0.09026407	0.687497437	0.075204381	0.572795123	NO
CTRL	1617	191	1182	A	WT	WT	1	NAN	NAN	NAN	NAN	NAN	x	D10	10	D	2	2	1	3	15	18813	15315	5364	4797	0.312551431	57	5.30713996	5.906772349	0.104029579	5.395841648	0.166981483	0.91130716	0.018619334	0.017909828	0.664254397	0.04182534	0.041800976	0.910688437	0.017968485	0.01735741	5.906905573	0.103851825	0.903199191	0.056309644	0.055595659	-0.101812162	0.06246534	0.060826465	0.042335109	0.137811883	5.695606937	0.20427602	0.974116176	0.130810958	0.062048085	172	185	0.456776053	0.057823097	0.999605541	0.994382687	0.125878504	0.958755231	0.126589597	0.964171283	NO
120	3205	191	1182	A	SINGLE.SITE	COG6_G640A	1	2204	2P03B06	COG6	D	NO	x	D12	12	D	2	2	1	3	15	20697	15504	5841	3429	-0.897248399	57	5.304929976	5.898668149	0.1617853	5.395408526	0.234341042	0.913147866	0.021228829	0.021451336	0.58253412	0.05604888	0.055990299	0.912338073	0.018878966	0.019681117	5.898640709	0.162911661	0.908437049	0.060264916	0.062781135	-0.096029685	0.066355631	0.068640917	0.055235274	0.153628744	5.687342073	0.217176185	0.980274801	0.146627819	0.070453586	172	185	0.462934678	0.066228597	0.998155018	1.00778976	0.144176934	1.098125454	0.143062511	1.08963744	NO
CTRL	1617	191	1182	A	WT	WT	1	NAN	NAN	NAN	NAN	NAN	x	E01	1	E	2	2	1	3	16	21252	16485	6212	3758	-0.819490771	57	5.29720843	5.905489334	0.153689871	5.40051813	0.227420161	0.913245016	0.021683901	0.021686073	0.571645949	0.057844329	0.057779943	0.911710087	0.019298875	0.020014867	5.905508946	0.15410366	0.906435125	0.061536963	0.063648131	-0.098235818	0.067788352	0.069688403	0.050324422	0.156517075	5.697369119	0.217097399	0.980236947	0.146031603	0.070161581	172	185	0.462896823	0.065936592	0.999914812	1.007707352	0.14354125	1.093283761	0.142443389	1.084921886	NO
155	3273	191	1182	A	OFF.TARGET	SET1_TTATCGAGTACGTTGGTGA2890del	1	54	Y54	SET1	NAN	YES	x	E03	3	E	2	2	1	3	16	16798	13260	3784	3445	0.55871631	57	5.324029861	5.905170154	0.065077621	5.428027828	0.119731335	0.918042495	0.01465945	0.014518944	0.441444767	0.080708551	0.080533991	0.917681257	0.013728663	0.01359711	5.905052449	0.065348955	0.925873921	0.045657522	0.045566099	-0.077017208	0.049378548	0.048916575	0.097018991	0.106939643	5.696912623	0.263791968	1.003203612	0.096454171	0.048557097	172	185	0.485863488	0.044332109	0.999834695	1.057704838	0.096509178	0.735063386	0.09124396	0.694960787	NO
CTRL	1617	191	1182	A	WT	WT	1	NAN	NAN	NAN	NAN	NAN	x	E05	5	E	2	2	1	3	16	17489	14150	4726	4128	-0.06556573	57	5.314613473	5.915329113	0.118701918	5.41900686	0.171500914	0.913313568	0.018800635	0.01815881	0.648478463	0.044770984	0.044741106	0.912343857	0.017649817	0.017395057	5.915698394	0.118999692	0.908455534	0.056218241	0.055976991	-0.096009337	0.062022732	0.061098089	0.055280508	0.13697245	5.707558567	0.222053484	0.982624032	0.126486978	0.061073207	172	185	0.465283909	0.056848219	1.001703107	1.012903939	0.123756235	0.942590941	0.122179636	0.930582758	NO
168	R54	191	1182	A	RAP1.MUTANT	PLATE	1	NAN	NAN	RAP1	NAN	NAN	x	E06	6	E	2	2	1	3	16	3966	3227	1686	888	-0.791868871	55	5.142893579	5.741694024	0.16686002	5.123557633	0.174714281	0.891158003	0.014373431	0.015246397	0.864734871	0.004601975	0.004601942	0.890833897	0.014080504	0.015226546	5.74165939	0.167004254	0.845183929	0.038091177	0.042219875	-0.168201008	0.045023034	0.04918843	-0.112927454	0.122234107	5.533519564	0.053845523	0.907869515	0.111748634	0.045603203	182	185	0.390529392	0.041378214	0.971201099	0.853985731	0.090483343	0.702290608	0.105954162	0.822368083	NO
151	3267	191	1182	A	SINGLE.SITE	NAP1_G1034A	1	1523	1P16A09	NAP1	NAN	YES	x	E07	7	E	2	2	1	3	16	20769	15925	5623	3105	-0.994310371	57	5.324351562	5.903060128	0.163191092	5.376881586	0.227043467	0.909616001	0.021330161	0.021832582	0.57421408	0.056818314	0.056757289	0.909234133	0.01848243	0.020011447	5.903567951	0.164570532	0.898637258	0.05738664	0.061427006	-0.106875821	0.063798385	0.06829172	0.030962452	0.154008332	5.695428124	0.197735429	0.971023875	0.14352286	0.067633957	172	185	0.453683752	0.063408968	0.999574158	0.987650875	0.138038717	1.051373648	0.139764689	1.064519533	NO
172	1617	172	1617	A	WT	WT	1	NAN	NAN	NAN	NAN	NAN	x	E08	8	E	2	2	1	3	16	19246	15638	5348	4506	-0.083530695	57	5.299887718	5.898699682	0.10244487	5.386124258	0.159989075	0.910530814	0.0176321	0.017496506	0.660794188	0.042337573	0.042312303	0.909941068	0.017082016	0.01690348	5.898642053	0.102341107	0.900848328	0.053545776	0.053643418	-0.104418374	0.059630681	0.058927747	0.036490686	0.133752046	5.690502226	0.203263663	0.973636224	0.123266573	0.058410365	172	185	0.4562961	0.054185376	0.99870964	0.99333785	0.117959337	0.898438792	0.11875047	0.90446447	NO
CTRL	1617	191	1182	A	WT	WT	1	NAN	NAN	NAN	NAN	NAN	x	E09	9	E	2	2	1	3	16	18416	13751	3816	3273	-0.365113683	58	5.305673575	5.899598923	0.103034025	5.38146346	0.17051312	0.910130094	0.01963704	0.01939997	0.553735896	0.060409903	0.060336578	0.909126189	0.018629643	0.018342543	5.899309332	0.103122664	0.898300716	0.058054254	0.057930814	-0.107250394	0.064312748	0.063717443	0.030118327	0.145365417	5.691169505	0.196891303	0.970626256	0.134879944	0.063507424	172	185	0.453286133	0.059282435	0.998826751	0.986785274	0.129055424	0.98295228	0.130783694	0.996115676	NO
82	2921	191	1182	A	SINGLE.SITE	ADE6_G3443A	2	1577	1P05D03	ADE6	NAN	YES	x	E10	10	E	2	2	1	3	16	14446	10166	1924	1859	-0.809724904	62	5.418274595	6.010204096	0.056599071	5.794420423	0.08739346	0.963793508	0.009289288	0.009238749	0.670841518	0.048742436	0.04870389	0.963597872	0.008417362	0.008889169	6.009992091	0.05674817	1.109943118	0.040182497	0.042244042	0.104308769	0.036039037	0.038087017	0.456087066	0.06923426	5.801852265	0.622860043	1.220678794	0.058748788	0.042351803	172	185	0.70333867	0.038126814	1.01825209	1.531139367	0.083000507	0.632174419	0.054208329	0.41287843	NO
59	2692	191	1182	A	SINGLE.SITE	NUP192_G3133A	1	99	Y99	NUP192	NAN	YES	x	E11	11	E	2	2	1	3	16	20172	16270	5669	5113	0.234487732	57	5.30803357	5.907801943	0.118972627	5.401071248	0.173232334	0.91072906	0.018557251	0.017802551	0.679518528	0.039136473	0.03911651	0.90979897	0.017856763	0.017193731	5.907894644	0.119045797	0.900402907	0.05621204	0.054739445	-0.104912941	0.06227634	0.060058189	0.035379478	0.136636576	5.699754818	0.202152455	0.973109966	0.126151104	0.059710823	172	185	0.455769842	0.055485835	1.000333513	0.992192208	0.120790381	0.920001478	0.121740909	0.927241185	NO
45	2204	191	1182	A	EMS.MUTANT	2P03B06	1	2204	2P03B06	NAN	NAN	NAN	x	E12	12	E	2	2	1	3	16	19661	16891	5885	5262	0.82997705	55	5.246024709	5.834621272	0.077313694	5.22874545	0.132860575	0.895405419	0.014943544	0.015562375	0.547427737	0.059640149	0.059569587	0.895256232	0.014260908	0.014931795	5.835118445	0.07809183	0.85733779	0.039488334	0.04258606	-0.153923284	0.046279516	0.049044856	-0.07834478	0.119103318	5.626978619	0.088428197	0.922229133	0.108617846	0.045885279	172	185	0.404889009	0.04166029	0.987560951	0.881426726	0.090692739	0.690762403	0.102893112	0.783686701	NO
187	1156	190	1180	A	m76	CIS	1	NAN	NAN	NAN	NAN	NAN	a	F01	1	F	2	2	1	3	16	20441	16189	5747	5098	0.073249149	58	5.301967615	5.906294626	0.117852319	5.457514027	0.182561208	0.9215295	0.018976919	0.018957001	0.616233236	0.051689982	0.05164402	0.920220586	0.017903036	0.017944879	5.906341948	0.117919627	0.93441963	0.060250228	0.061316949	-0.067829659	0.064524149	0.065071899	0.116876549	0.141076081	5.699286339	0.28122967	1.01205911	0.130907845	0.06706107	172	185	0.494718987	0.062836081	1.000251293	1.076982894	0.136791565	1.041874699	0.127013684	0.967401344	NO
CTRL	1617	191	1182	A	WT	WT	1	NAN	NAN	NAN	NAN	NAN	x	F03	3	F	2	2	1	3	16	20128	15582	5828	3619	-0.847783042	58	5.316261497	5.90982818	0.146181118	5.416402495	0.219848435	0.914641795	0.021494884	0.0208653	0.575065674	0.057459559	0.057396448	0.912444254	0.019150036	0.0191983	5.910446071	0.146403189	0.908776511	0.061057016	0.062621883	-0.095656077	0.06734851	0.067826463	0.05606561	0.153111858	5.703390462	0.220418731	0.98183535	0.142943622	0.068906427	172	185	0.464495226	0.064681438	1.000971585	1.01118701	0.140808832	1.072472262	0.139251029	1.060607238	NO
188	1200	190	1180	A	m75	CIS	1	NAN	NAN	NAN	NAN	NAN	a	F05	5	F	2	2	1	3	16	18752	14536	4727	3934	-0.447125051	58	5.316294555	5.918386333	0.115034641	5.446482797	0.181434722	0.918533825	0.019674307	0.019410974	0.612612541	0.051689982	0.05164402	0.917308529	0.018431101	0.018440613	5.918325096	0.114543109	0.924633783	0.061416104	0.061242372	-0.07835753	0.066336147	0.065840472	0.094104253	0.144150029	5.711269487	0.258457374	1.000525213	0.133981793	0.06709045	172	185	0.48318509	0.062865462	1.002354391	1.051874074	0.136855525	1.042361854	0.130106377	0.990956883	NO
73	2907	191	1182	A	SINGLE.SITE	ADE4_C734T	2	1509	1P12D09	ADE4	NAN	YES	x	F06	6	F	2	2	1	3	16	22272	18244	6008	5681	0.481532569	55	5.260677092	5.842549333	0.069684672	5.356696869	0.122831453	0.916184872	0.014536629	0.01432607	0.461926876	0.077749963	0.077593862	0.916137114	0.013375743	0.013419375	5.842686239	0.069876782	0.920759713	0.044383241	0.04427494	-0.082556174	0.048075181	0.047883357	0.084943782	0.105171739	5.63563063	0.249296903	0.995959117	0.095003503	0.047138548	172	185	0.478618993	0.042913559	0.989079419	1.04193387	0.093421054	0.711542648	0.089661212	0.682905766	NO
CTRL	1617	191	1182	A	WT	WT	1	NAN	NAN	NAN	NAN	NAN	x	F07	7	F	2	2	1	3	16	19033	14942	5014	4367	-0.06154262	58	5.310122977	5.914348976	0.118583651	5.41444352	0.174608465	0.912194154	0.018554687	0.017724028	0.650433089	0.044258644	0.044229779	0.911044312	0.017395199	0.016930453	5.91477576	0.118441896	0.904323443	0.054874772	0.053956197	-0.100568192	0.060759129	0.059175059	0.045118056	0.133376249	5.707720151	0.209471177	0.976586828	0.123208013	0.058746154	172	185	0.459246705	0.054521166	1.001731466	0.999761194	0.118690336	0.904006457	0.118718687	0.904222391	NO
175	2004	191	1182	A	CHR2SNP.69593(T_G)	POLYMORPHISM	2	NAN	NAN	NAN	NAN	NAN	x	F08	8	F	2	2	1	3	16	20406	15898	5297	4126	-0.578978732	58	5.315655375	5.917730738	0.138252411	5.419893803	0.207148368	0.913141376	0.020147078	0.02027167	0.588288408	0.054894855	0.054839813	0.911420452	0.018126049	0.018886819	5.91789619	0.138509617	0.90551512	0.05702397	0.060631527	-0.099251304	0.063110025	0.066166135	0.048059475	0.149437032	5.710840582	0.212412596	0.977991375	0.139268796	0.06659962	172	185	0.460651251	0.062374631	1.002279116	1.002818834	0.135787007	1.034223474	0.135405322	1.031316364	NO
30	2037	191	1182	A	EMS.MUTANT	2P03H11	1	2037	2P03H11	NAN	NAN	NAN	x	F09	9	F	2	2	1	3	16	19218	15058	4880	4154	-0.359890811	58	5.304953814	5.919032829	0.137495884	5.383598164	0.178301541	0.906871673	0.01810578	0.018216485	0.700982556	0.03478425	0.034770231	0.905591793	0.0173013	0.017636479	5.918799281	0.137272074	0.887436893	0.052359328	0.053845891	-0.119417867	0.05909944	0.060147101	0.002479343	0.138901677	5.711743672	0.166832464	0.956683826	0.128733441	0.058818522	172	185	0.439343702	0.054593533	1.002437613	0.956433176	0.118847877	0.905206374	0.124261559	0.946439747	NO
138	3245	191	1182	A	SINGLE.SITE	HXK2_G1388A	2	2053	2P05G06	HXK2	NAN	YES	x	F10	10	F	2	2	1	3	16	23784	20026	6118	5538	0.400540502	55	5.250389424	5.831850583	0.074008364	5.204182406	0.126511952	0.892300685	0.016034152	0.016007239	0.554961202	0.057844329	0.057779943	0.892528599	0.01571101	0.01548008	5.831864911	0.074078927	0.849791858	0.042914033	0.043050371	-0.162763834	0.050494661	0.050118574	-0.099674877	0.122997656	5.624809303	0.064678244	0.912314242	0.11282942	0.046545754	172	185	0.394974119	0.042320765	0.987180226	0.859842417	0.092130566	0.701713634	0.107148199	0.816095625	NO
CTRL	1617	191	1182	A	WT	WT	1	NAN	NAN	NAN	NAN	NAN	x	F11	11	F	2	2	1	3	16	19917	16603	7134	4948	-0.571834161	57	5.291277467	5.89817566	0.128780326	5.398673345	0.21123006	0.91239862	0.022013515	0.022199331	0.53262617	0.064388121	0.064299361	0.910725678	0.019802248	0.020418458	5.898484677	0.128935466	0.903316696	0.062083267	0.06398362	-0.101682072	0.06881379	0.070477343	0.042626341	0.158557983	5.691429068	0.206979462	0.975400246	0.148389747	0.070576845	172	185	0.458060122	0.066351857	0.998872305	0.997178053	0.144445264	1.100169194	0.144854034	1.103282599	NO
35	2072	191	1182	A	EMS.MUTANT	2P07G03	1	2072	2P07G03	NAN	NAN	NAN	x	F12	12	F	2	2	1	3	16	22550	17263	5851	5655	0.147773456	57	5.332725032	5.898157267	0.096063898	5.481112841	0.162373587	0.928388621	0.015460602	0.014755567	0.318527907	0.103398517	0.103032376	0.928340291	0.011372982	0.01142713	5.898299103	0.096731549	0.962912441	0.041080711	0.041665548	-0.037792795	0.042690369	0.043026029	0.180372668	0.089965073	5.691243494	0.344725789	1.045641604	0.079796837	0.043557856	172	185	0.528301481	0.039332868	0.998839736	1.150090602	0.085626036	0.652171792	0.074451557	0.56706123	NO
190	1180	190	1180	A	GFP.MATA	GFP.MATA	1	NAN	NAN	NAN	NAN	NAN	a	G01	1	G	2	2	1	3	16	21316	15991	5913	3515	-0.937431806	57	5.323682656	5.888775187	0.179238359	5.138495324	0.248597267	0.872673218	0.021857098	0.022432146	0.57960318	0.049767571	0.049726544	0.872586381	0.019178805	0.02088971	5.888790255	0.178658122	0.799251683	0.044764979	0.04851154	-0.224079385	0.055915233	0.060380962	-0.255623092	0.161991582	5.676191309	-0.094819519	0.851495413	0.151241118	0.053193503	172	185	0.334155289	0.048968515	0.996198008	0.727442326	0.106602444	0.811938871	0.146544186	1.116155663	NO
189	1188	190	1180	A	m63	CIS	1	NAN	NAN	NAN	NAN	NAN	a	G02	2	G	2	2	1	3	16	18864	15051	5691	4436	-0.425562668	58	5.300501284	5.905539269	0.124392068	5.432306117	0.200329154	0.917343831	0.020789347	0.021657509	0.568166899	0.059127019	0.05905826	0.915320676	0.019827765	0.020339612	5.905650462	0.124525451	0.918080526	0.064641257	0.065948117	-0.085470174	0.070741317	0.071560284	0.078559238	0.157658084	5.693051517	0.239362811	0.991054451	0.14690762	0.072171641	172	185	0.473714328	0.067946653	0.999157052	1.031256615	0.147917069	1.126612245	0.143433814	1.092465472	NO
49	2505	191	1182	A	SINGLE.SITE	CYC8_G1010A	2	126	Y126	CYC8	NAN	YES	x	G03	3	G	2	2	1	3	16	20776	15955	5292	4791	0.296615578	57	5.309831548	5.888350818	0.091527538	5.261607788	0.153747014	0.893128255	0.016399859	0.018637101	0.419403202	0.080451228	0.080278328	0.894113832	0.01574973	0.017231604	5.888694862	0.092399758	0.854157766	0.043626059	0.049617204	-0.157639365	0.051118722	0.056830917	-0.087278356	0.140013041	5.676095916	0.073525217	0.915980094	0.129262577	0.053798816	172	185	0.398639971	0.049573827	0.996181266	0.867822826	0.107920184	0.821975457	0.124357393	0.947169667	NO
CTRL	1617	191	1182	A	WT	WT	1	NAN	NAN	NAN	NAN	NAN	x	G04	4	G	2	2	1	3	16	18964	15022	5043	4285	-0.235395949	58	5.310635607	5.913088187	0.128853523	5.415662661	0.19596416	0.912765171	0.019814463	0.019047477	0.629092735	0.047973652	0.0479369	0.911320982	0.018500303	0.018039154	5.91324819	0.12857585	0.905199639	0.058893775	0.058138192	-0.099599763	0.064772988	0.063387288	0.047281616	0.143403275	5.700649245	0.208085188	0.97592644	0.132652811	0.063161875	172	185	0.458586317	0.058936887	1.000490489	0.998323556	0.12830318	0.977222804	0.128518634	0.978863814	NO
141	3250	191	1182	A	SINGLE.SITE	NAM7_G2462A	1	2058	2P06D08	NAM7	NAN	YES	x	G05	5	G	2	2	1	3	16	18401	14400	5297	3775	-0.7545803	58	5.329480746	5.922879016	0.124128476	5.500167839	0.178878692	0.926289444	0.018732456	0.019715834	0.611025345	0.053228185	0.053178001	0.924859603	0.018612822	0.018474987	5.923318843	0.123929424	0.950476517	0.065219408	0.064706994	-0.050791823	0.06880217	0.06785254	0.153153679	0.14357179	5.710719897	0.313957252	1.029102061	0.132821326	0.07030497	172	185	0.511761938	0.066079981	1.002257936	1.114084698	0.143853402	1.09566127	0.1291225	0.983463171	NO
172	1617	191	1182	A	WT	WT	1	NAN	NAN	NAN	NAN	NAN	x	G06	6	G	2	2	1	3	16	19488	15590	5042	4608	0.278140713	57	5.306715359	5.906855506	0.107777535	5.395557023	0.163059635	0.910862878	0.017726862	0.017379217	0.647163738	0.044642897	0.044613275	0.909874243	0.017430027	0.016719732	5.907332559	0.10760294	0.900638797	0.054341077	0.053122758	-0.104650993	0.060381611	0.058346277	0.035968114	0.132523089	5.694733613	0.196771687	0.970569939	0.121772625	0.057329062	172	185	0.453229815	0.053104073	0.999452268	0.986662673	0.115605384	0.880509883	0.117168093	0.892412277	NO
66	2798	191	1182	A	SINGLE.SITE	CCC2_G2108A	1	135	Y135	CCC2	NAN	YES	x	G07	7	G	2	2	1	3	16	20184	15791	5178	4219	-0.418209845	57	5.297673295	5.900865598	0.142379047	5.358465961	0.204582701	0.906321936	0.020179457	0.020142457	0.578611689	0.055535962	0.055478972	0.904879512	0.018578835	0.018664501	5.90091843	0.142170349	0.885283641	0.055822695	0.056924446	-0.121847187	0.062993853	0.063565305	-0.003090702	0.14766337	5.688319484	0.157712871	0.952536011	0.136912906	0.061987843	172	185	0.435195887	0.057762855	0.998326559	0.947403554	0.12574736	0.957756373	0.132728403	1.010927571	NO
CTRL	1617	191	1182	A	WT	WT	1	NAN	NAN	NAN	NAN	NAN	x	G08	8	G	2	2	1	3	16	19642	15586	5218	4273	-0.369578721	58	5.318209321	5.916670778	0.133506041	5.424946939	0.194606443	0.9144245	0.019953308	0.01964475	0.617691487	0.050152024	0.050110039	0.912505531	0.019005453	0.01853651	5.916760958	0.133757713	0.908972541	0.060387801	0.059614337	-0.095440393	0.066812235	0.065035863	0.056544794	0.145688515	5.704162013	0.217348367	0.980357541	0.134938051	0.064847903	172	185	0.463017417	0.060622915	1.001106996	1.00796988	0.131973593	1.005178553	0.130930096	0.997230744	NO
111	3191	191	1182	A	SINGLE.SITE	ATP23_G476A	1	2204	2P03B06	ATP23	D	YES	x	G09	9	G	2	2	1	3	16	19701	16748	6213	5076	0.41409565	55	5.231670803	5.814932801	0.085770166	5.188966427	0.126753311	0.89174822	0.013790902	0.014557043	0.616509761	0.047333042	0.047297741	0.89124251	0.012904131	0.014033631	5.81495868	0.085990972	0.846289374	0.034745973	0.038490341	-0.166893928	0.041168433	0.045074793	-0.109732102	0.111080926	5.602359734	0.051071471	0.906739028	0.100330462	0.040830169	172	185	0.389398905	0.036605181	0.983240222	0.847705406	0.079687974	0.606944467	0.094004324	0.715985132	NO
24	1597	191	1182	A	EMS.MUTANT	1P11D07	1	1597	1P11D07	NAN	NAN	NAN	x	G10	10	G	2	2	1	3	16	16129	12377	3776	3621	0.083231152	59	5.363673185	5.949854795	0.070102944	5.624337797	0.091388314	0.945233337	0.007987255	0.008057235	0.700949955	0.041057032	0.041033986	0.94533201	0.007257029	0.007624861	5.949849478	0.070385885	1.028726759	0.029990032	0.031499773	0.028321881	0.029231128	0.030606053	0.313247972	0.059552122	5.737250533	0.474051545	1.121003391	0.048801658	0.030316626	172	185	0.603663267	0.026091637	1.006914186	1.314150113	0.056800421	0.432621133	0.043222171	0.329202218	NO
20	1577	191	1182	A	EMS.MUTANT	1P05D03	1	1577	1P05D03	NAN	NAN	NAN	x	G11	11	G	2	2	1	3	16	15964	12091	2872	2738	-0.88014675	61	5.398422145	5.990062559	0.069749857	5.728472283	0.102918387	0.956673218	0.010023836	0.010379908	0.640904537	0.052715423	0.052666674	0.956704887	0.009678959	0.009824305	5.989809549	0.069751318	1.077924227	0.043555682	0.044148047	0.075037179	0.040455603	0.041018919	0.402183905	0.076361937	5.777210604	0.562987478	1.178783566	0.065611473	0.044550282	172	185	0.661443442	0.040325293	1.013927364	1.439935179	0.087786505	0.668627036	0.060965595	0.464345233	NO
CTRL	1617	191	1182	A	WT	WT	1	NAN	NAN	NAN	NAN	NAN	x	G12	12	G	2	2	1	3	16	20402	16330	5816	5190	0.16053794	57	5.298336783	5.904286718	0.124071361	5.402777928	0.182219669	0.911919699	0.018736842	0.018879566	0.629425989	0.047845527	0.047809068	0.910272861	0.018142863	0.017951549	5.904675107	0.124168943	0.901890292	0.056910119	0.057483619	-0.103262393	0.063185558	0.06285772	0.039085304	0.142955629	5.692076161	0.199888877	0.972039763	0.132205165	0.062434893	172	185	0.45469964	0.058209904	0.998985873	0.989862421	0.126720568	0.96516882	0.128018364	0.975053502	NO
117	3202	191	1182	A	OFF.TARGET	FRA1_G2175A	2	2012	2P01C08	FRA1	NAN	YES	x	H01	1	H	2	2	1	3	16	20861	16122	5494	4026	-0.714574339	58	5.303575539	5.922425187	0.158873618	5.312810769	0.198606109	0.895495587	0.017239279	0.017871561	0.581774062	0.0529718	0.052922337	0.894429213	0.015601538	0.01609962	5.922620014	0.158523194	0.855032837	0.043316742	0.044867698	-0.156615406	0.050646554	0.052146378	-0.084812068	0.126298702	5.706974412	0.076373738	0.917167333	0.113311065	0.047294357	172	185	0.399827209	0.043069369	1.001600585	0.870407395	0.093760244	0.714126098	0.107719954	0.820450403	NO
CTRL	1617	191	1182	A	WT	WT	1	NAN	NAN	NAN	NAN	NAN	x	H02	2	H	2	2	1	3	16	21510	16218	5410	3706	-0.798111075	58	5.323176079	5.928309292	0.172075005	5.435759859	0.229481376	0.914374434	0.020512722	0.02018983	0.601101165	0.052843611	0.052794505	0.913453246	0.01826657	0.018492608	5.928593679	0.172264106	0.91201637	0.05881166	0.060023508	-0.092097339	0.06434869	0.065200773	0.063955926	0.14560536	5.712948078	0.225141731	0.984117472	0.132617723	0.064231444	172	185	0.466777348	0.060006456	1.002648992	1.016155095	0.130631587	0.994957152	0.128554773	0.979139067	NO
93	3092	191	1182	A	SINGLE.SITE	SSN2_C2911T	2	89	Y89	SSN2	NAN	YES	x	H03	3	H	2	2	1	3	16	21870	16317	6731	5605	-0.312701001	56	5.313623636	5.877426637	0.133386984	5.413308148	0.207740876	0.921017265	0.023404077	0.023207277	0.568224631	0.060025017	0.059953082	0.920204365	0.022450215	0.021913877	5.877362132	0.133825991	0.934364499	0.075910783	0.074348007	-0.067888661	0.081079235	0.078964761	0.116749698	0.171079223	5.66171653	0.277935503	1.010374361	0.158091587	0.080720329	172	185	0.493034237	0.076495341	0.993657616	1.073315263	0.166527211	1.268356629	0.155152188	1.181718618	NO
CTRL	1617	191	1182	A	WT	WT	1	NAN	NAN	NAN	NAN	NAN	x	H06	6	H	2	2	1	3	16	19657	15568	5641	4858	-0.068079145	58	5.302881181	5.911810955	0.130156432	5.408386684	0.186557136	0.912133905	0.0194799	0.018876273	0.645941831	0.045027163	0.04499677	0.910546889	0.018652595	0.01803107	5.91173615	0.13009449	0.902752897	0.058558211	0.057290105	-0.10230641	0.064977426	0.06287725	0.041228213	0.142169398	5.696090549	0.202414018	0.973233787	0.129181762	0.061161313	172	185	0.455893664	0.056936325	0.999690417	0.992461762	0.123948038	0.944051814	0.124889485	0.951222355	NO
135	3241	191	1182	A	SINGLE.SITE	CAF40_G674A	1	2037	2P03H11	CAF40	NAN	YES	x	H07	7	H	2	2	1	3	16	22792	17665	6368	5108	-0.576863526	57	5.285287941	5.888623393	0.141658147	5.387528632	0.194480381	0.912394194	0.019035292	0.018878045	0.645737614	0.045283348	0.045252433	0.91107049	0.018028734	0.017754312	5.888776183	0.141735973	0.904406267	0.057337581	0.05632984	-0.100476609	0.063286214	0.061863256	0.045322771	0.13921524	5.673130582	0.206508576	0.975176337	0.126227604	0.060007866	172	185	0.457836213	0.055782878	0.995660836	0.996690612	0.121437031	0.924926696	0.121840248	0.927997801	NO
CTRL	1617	191	1182	A	WT	WT	1	NAN	NAN	NAN	NAN	NAN	x	H10	10	H	2	2	1	3	16	22090	17552	5980	4502	-0.588969575	58	5.309008138	5.917979979	0.147793646	5.422006777	0.213980202	0.913859137	0.021287891	0.020953249	0.555595268	0.060538202	0.060464409	0.911701359	0.019528527	0.019233252	5.917649561	0.147200206	0.906407371	0.062003835	0.062156551	-0.098266437	0.068353114	0.067601961	0.050256169	0.152859565	5.702003959	0.211441975	0.97752744	0.139871928	0.066823152	172	185	0.460187317	0.062598163	1.000728248	1.001808868	0.136273627	1.037929821	0.136027572	1.036055734	NO
130	3227	191	1182	A	SINGLE.SITE	ADE5_G2081A	2	1597	1P11D07	ADE5	NAN	YES	x	H11	11	H	2	2	1	3	16	16806	12125	2791	2611	-0.674415201	60	5.375542995	5.965313672	0.067586864	5.669542804	0.09279996	0.950294404	0.008475072	0.008791101	0.72752447	0.037344211	0.037326866	0.949976407	0.007844747	0.008475662	5.965319071	0.0676566	1.048290726	0.033757168	0.036141707	0.047160958	0.032179707	0.034534064	0.349567172	0.065890873	5.749673469	0.510752977	1.144226655	0.052903237	0.034093199	172	185	0.626886532	0.02986821	1.009094469	1.364706206	0.065021866	0.49523987	0.047645321	0.362891198	NO
8	134	190	1180	A	EMS.MUTANT	Y134	1	134	Y134	NAN	NAN	NAN	a	H12	12	H	2	2	1	3	16	20574	16507	6507	5046	-0.432558803	57	5.288544596	5.880185123	0.125851556	5.042027842	0.218877893	0.854064973	0.026836294	0.027991931	0.398393201	0.07749276	0.077338198	0.852348853	0.025555278	0.025952666	5.880191161	0.126733328	0.755418307	0.051030141	0.051969815	-0.280483634	0.067550008	0.067962265	-0.413880621	0.203296047	5.664545559	-0.252694816	0.800129898	0.190308411	0.057158698	170	171	0.283990572	0.053062792	1.00376858	0.756269886	0.141306774	0.900762773	0.186847019	1.19105995	NO
CTRL	1617	191	1182	A	WT	WT	1	NAN	NAN	NAN	NAN	NAN	x	A01	1	A	3	2	1	3	17	20694	16190	6363	3761	-0.843456869	58	5.306480949	5.911592219	0.146459151	5.411453026	0.226613051	0.913345092	0.022117456	0.022549629	0.534226393	0.064131402	0.064043698	0.911332709	0.019623972	0.020637719	5.911779923	0.146812887	0.905236822	0.06258446	0.065220075	-0.099558688	0.0690831	0.071551256	0.047373325	0.160856646	5.707923138	0.217852942	0.980600088	0.152948719	0.073540484	172	185	0.463259965	0.069315496	1.001767091	1.008497897	0.150896984	1.149308805	0.149625482	1.139624395	NO
140	3248	191	1182	A	SINGLE.SITE	BRE2_G405A	2	2067	2P07D07	BRE2	NAN	YES	x	A02	2	A	3	2	1	3	17	20494	15533	5632	3574	-0.71223472	57	5.318669134	5.883663987	0.140712194	5.351759597	0.228111044	0.908059424	0.020870967	0.02104411	0.530731803	0.064131402	0.064043698	0.907829702	0.018550874	0.018798811	5.884286952	0.141440061	0.894280738	0.056927831	0.058033079	-0.111735529	0.063816645	0.064439572	0.019979799	0.147105932	5.680430167	0.190459417	0.967607559	0.139198006	0.065120361	172	185	0.450267435	0.060895372	0.996941947	0.980213694	0.132566722	1.009696127	0.135242675	1.030077557	NO
72	2906	191	1182	A	SINGLE.SITE	ADE4_C734T	1	1509	1P12D09	ADE4	NAN	YES	x	A03	3	A	3	2	1	3	17	22812	18667	6400	6101	0.826686056	55	5.258986981	5.844200606	0.070128492	5.336219505	0.124834941	0.912470362	0.014503501	0.014215302	0.428760345	0.082767525	0.082579299	0.912588139	0.012989601	0.01314898	5.844120666	0.070465807	0.909236963	0.041623294	0.042091748	-0.095149534	0.045756547	0.046153611	0.057190792	0.102799502	5.64026388	0.227670409	0.98534375	0.094891575	0.046075703	172	185	0.468003626	0.041850714	0.989892576	1.018824652	0.091107284	0.693919794	0.08942391	0.681098354	NO
CTRL	1617	191	1182	A	WT	WT	1	NAN	NAN	NAN	NAN	NAN	x	A05	5	A	3	2	1	3	17	20132	15648	4712	3769	-0.49094693	57	5.318693168	5.925717313	0.136046801	5.426132105	0.197530076	0.913093612	0.020370213	0.019564344	0.596159134	0.053484576	0.053433664	0.911425176	0.018306823	0.018297483	5.925944587	0.136632024	0.905530107	0.058334653	0.058746942	-0.099234753	0.064225148	0.064131178	0.048096413	0.144786793	5.722087802	0.218576031	0.980947888	0.136878867	0.065861418	172	185	0.463607765	0.061636429	1.004253056	1.009255042	0.134179972	1.021983469	0.132949519	1.012611705	NO
51	2507	191	1182	A	SINGLE.SITE	WWM1_C313T	2	96	Y96	WWM1	NAN	YES	x	A06	6	A	3	2	1	3	17	17898	13920	4306	3468	-0.445350922	58	5.317918127	5.927716223	0.145882551	5.386915224	0.196848958	0.907341946	0.018371455	0.018334185	0.662449438	0.04131313	0.04128965	0.906183401	0.017362318	0.017457517	5.927573221	0.146465562	0.889234484	0.052643539	0.053664514	-0.117394317	0.059142768	0.059768125	0.007105719	0.137794828	5.723716435	0.177585337	0.961623341	0.129886902	0.059987118	172	185	0.444283217	0.05576213	1.004538888	0.967186297	0.121391864	0.92458268	0.125510322	0.955950971	NO
63	2729	191	1182	A	SINGLE.SITE	TYE7_�C391T	2	134	Y134	TYE7	NAN	YES	x	A07	7	A	3	2	1	3	17	22328	17239	6272	3868	-0.873830202	57	5.29739703	5.900575745	0.154690355	5.224666412	0.198203341	0.884063514	0.019087342	0.020076082	0.596455077	0.048742436	0.04870389	0.882662531	0.017740903	0.018795885	5.900770537	0.154838727	0.823803112	0.044820969	0.048323261	-0.19382372	0.054602221	0.057929045	-0.176827563	0.14913623	5.696913752	-0.006347945	0.884030011	0.141228304	0.05426667	172	185	0.366689888	0.050041682	0.999834893	0.79826881	0.108938684	0.829732874	0.136468671	1.039415375	NO
132	3229	191	1182	A	SINGLE.SITE	CIA2_G626A	2	2154	2P16H09	CIA2	B	YES	x	A08	8	A	3	2	1	3	17	19257	15432	5205	4517	-0.159898204	57	5.307123463	5.90539485	0.107794888	5.247381536	0.187264519	0.886079344	0.022386307	0.021425997	0.533880715	0.059640149	0.059569587	0.88495264	0.020966099	0.020344549	5.905724797	0.107867121	0.829658163	0.053399119	0.053578618	-0.186741515	0.064595165	0.063580083	-0.158918908	0.162420484	5.701868011	0.01156071	0.890973361	0.154512558	0.060443951	172	185	0.373633237	0.056218962	1.000704388	0.813384196	0.122386369	0.932157344	0.150465635	1.146023427	NO
CTRL	1617	191	1182	A	WT	WT	1	NAN	NAN	NAN	NAN	NAN	x	A09	9	A	3	2	1	3	17	20569	15830	5390	4126	-0.542847671	57	5.306053989	5.905681219	0.116223535	5.406981903	0.202600526	0.913733968	0.021493932	0.022134199	0.578940486	0.05669007	0.056629457	0.912426105	0.020636775	0.020984749	5.905738196	0.116962496	0.90871847	0.065538922	0.068986982	-0.095719948	0.072624524	0.074348614	0.055923688	0.168698604	5.70188141	0.226403305	0.984728882	0.160790677	0.07797491	172	185	0.467388759	0.073749921	1.00070674	1.017486111	0.160550546	1.222835283	0.157791388	1.201820123	NO
50	2506	191	1182	A	SINGLE.SITE	WWM1_C313T	1	96	Y96	WWM1	NAN	YES	x	A10	10	A	3	2	1	3	17	19968	15501	5213	3437	-0.790917381	57	5.327750883	5.924624	0.147266189	5.369588745	0.199304584	0.905747717	0.019109471	0.01972002	0.687530894	0.036832181	0.036815539	0.905174343	0.01814699	0.018973995	5.925078304	0.147460449	0.886173472	0.055327269	0.057363252	-0.120842555	0.062001949	0.064260399	-0.000785117	0.148458964	5.721221519	0.169694501	0.957993368	0.140551038	0.064402059	172	185	0.440653245	0.06017707	1.004101019	0.959283996	0.131003008	0.997786079	0.13656332	1.040136272	NO
150	3264	191	1182	A	SINGLE.SITE	NAM7_G2463	2	2142	2P15E04	NAM7	NAN	YES	x	A11	11	A	3	2	1	3	17	19736	16089	5745	4937	-0.205463827	58	5.322061667	5.917522839	0.091988756	5.490215607	0.133614778	0.925878814	0.015922852	0.016386984	0.722314278	0.034400296	0.034386736	0.925172069	0.015973784	0.01606551	5.917788286	0.09186224	0.951579129	0.056697655	0.056571225	-0.049632433	0.059468441	0.059254383	0.155597165	0.125213826	5.713931501	0.326076783	1.035556202	0.117305899	0.062849454	172	185	0.518216078	0.058624466	1.002821587	1.128135096	0.127623052	0.9720426	0.113127454	0.861636698	NO
88	3065	191	1182	A	SINGLE.SITE	ADE5_G1385A	1	1600	1P12F03	ADE5	NAN	YES	x	A12	12	A	3	2	1	3	17	13098	8943	2864	1385	-1.31378157	64	5.449998009	6.040234339	0.074689049	5.792196213	0.108322275	0.958520915	0.009862915	0.012113603	0.70665954	0.041697285	0.041673145	0.958703387	0.009458241	0.011500344	6.040358473	0.074676258	1.087030565	0.043298668	0.051061579	0.083449726	0.039919477	0.04768123	0.417812184	0.086950564	5.836501688	0.588291801	1.196184467	0.079042638	0.055045474	172	185	0.678844344	0.050820486	1.024333226	1.477816226	0.110634108	0.842646096	0.074863238	0.570196809	NO
54	2524	191	1182	A	SINGLE.SITE	ADE2_G34A	2	NAN	NAN	ADE2	NAN	YES	x	B02	2	B	3	2	1	3	17	12874	9847	3671	3241	-0.170456462	57	5.323595551	5.913541539	0.091304421	5.514111911	0.126649656	0.932073594	0.011399863	0.011593521	0.601384519	0.055920648	0.055862467	0.932548169	0.009855677	0.010568896	5.91373016	0.091212583	0.978405536	0.037069815	0.039292919	-0.021831036	0.037909958	0.040203645	0.213278288	0.082095698	5.715738289	0.387815896	1.069676868	0.080394087	0.045816164	172	185	0.552336744	0.041591175	1.003138687	1.202414383	0.090542278	0.689616416	0.075300395	0.573526419	NO
CTRL	1617	191	1182	A	WT	WT	1	NAN	NAN	NAN	NAN	NAN	x	B03	3	B	3	2	1	3	17	20208	16013	5073	3915	-0.574989626	57	5.300321626	5.903803272	0.118561531	5.404382089	0.182401662	0.913188072	0.019580052	0.019619456	0.594398164	0.05399738	0.053944991	0.911724253	0.018134699	0.018478762	5.904033957	0.118913432	0.906480174	0.057741848	0.059442617	-0.09818612	0.063659981	0.064812231	0.050435197	0.146159107	5.706042087	0.224972804	0.984035661	0.144457496	0.069954046	172	185	0.466695538	0.065729058	1.001436958	1.015976998	0.143089456	1.089842668	0.140839267	1.072704077	NO
183	2705	191	1182	A	RAP1.PAM.INS	RAP1.CONTROL	1	NAN	NAN	NAN	NAN	NAN	x	B04	4	B	3	2	1	3	17	19362	15696	4428	4077	0.369909288	57	5.303445337	5.887250358	0.071384695	5.359609742	0.13213583	0.909620113	0.017488812	0.016789382	0.531306814	0.064259761	0.06417153	0.909719331	0.016657712	0.016205576	5.887274109	0.071789022	0.900153487	0.052142103	0.050824771	-0.105189989	0.057976995	0.05615933	0.0347567	0.126944087	5.689282238	0.209294308	0.976502503	0.125242476	0.059705634	182	185	0.45916238	0.055480646	0.998539374	1.004068142	0.121321675	0.941643735	0.120830121	0.937828516	NO
42	2175	191	1182	A	EMS.MUTANT	2P18H11	1	2175	2P18H11	NAN	NAN	NAN	x	B05	5	B	3	2	1	3	17	19607	15936	5909	4429	-0.424536436	57	5.295619486	5.895817431	0.116696031	5.309593975	0.172929322	0.898256501	0.018593495	0.019528832	0.585944436	0.0529718	0.052922337	0.897795444	0.01763567	0.018377967	5.896050637	0.116058267	0.864508604	0.050356412	0.052469833	-0.145594021	0.058362019	0.060260984	-0.058488134	0.143860793	5.698058766	0.116049474	0.934060301	0.142159182	0.061736623	172	185	0.416720177	0.057511635	1.000035848	0.907182693	0.125200464	0.953590929	0.138010199	1.05115644	NO
181	2701	191	1182	A	RAP1.PAM.MUT	RAP1.CONTROL	1	NAN	NAN	NAN	NAN	NAN	x	B06	6	B	3	2	1	3	17	14216	9205	1596	1488	-0.888719395	62	5.421939506	6.025994454	0.063102931	5.616798159	0.150143294	0.932102117	0.021120663	0.020035715	0.659996804	0.045155254	0.045124602	0.932030127	0.020912315	0.019864266	6.02639354	0.06316775	0.976470515	0.079464863	0.074423275	-0.023810725	0.080447995	0.075514082	0.209227204	0.156125645	5.828401669	0.383764811	1.067372846	0.154424034	0.087649641	182	185	0.550032723	0.083424653	1.022956554	1.202777836	0.182427916	1.415922627	0.151672163	1.177210442	NO
CTRL	1617	191	1182	A	WT	WT	1	NAN	NAN	NAN	NAN	NAN	x	B07	7	B	3	2	1	3	17	18844	15240	4379	4083	0.593522669	57	5.307243417	5.889039926	0.073983045	5.354721016	0.134414754	0.908667516	0.017084679	0.016490284	0.57179644	0.057203055	0.057140784	0.908744123	0.016463484	0.01599271	5.889295843	0.07411745	0.897111817	0.051040154	0.050098777	-0.108574768	0.057071913	0.055394851	0.027130572	0.126088697	5.691303973	0.20166818	0.972880801	0.124387086	0.05884736	172	185	0.455540677	0.054622371	0.99885035	0.991693325	0.118910656	0.905684531	0.119906682	0.913270775	NO
185	3139	191	1182	A	NULL	NULL	1	NAN	NAN	NAN	NAN	NAN	x	B08	8	B	3	2	1	3	17	17543	14426	4516	4322	0.69226474	56	5.292969419	5.874917923	0.076437653	2.890421019	0.196325287	0.491583221	0.032242053	0.03497358	0.24059638	0.042721761	0.042695799	0.490836933	0.031666622	0.034861294	5.874586422	0.076475853	0.514912948	0.003783083	0.004036797	-0.663757426	0.007343312	0.007823768	-3.24090503	0.266793828	5.676594552	-3.066367422	0.517798319	0.265092217	0.00477594	172	185	0.000458195	0.000550951	0.996268778	0.000997472	0.001199398	0.009135231	1.202437895	9.15838356	NO
157	3275	191	1182	A	SINGLE.SITE	ADE2_C1477T	2	2217	2P09C10	ADE2	NAN	YES	x	B09	9	B	3	2	1	3	17	18820	14753	6416	5784	-0.316443595	56	5.296279707	5.854886937	0.127624854	5.45572855	0.154614856	0.932104594	0.012713515	0.012464067	0.766655261	0.028258331	0.028250813	0.932280831	0.012149642	0.011999934	5.85497216	0.127573962	0.977405978	0.045406446	0.044149522	-0.022853178	0.04650943	0.045387553	0.211187703	0.092435765	5.65698029	0.385725311	1.068486699	0.090734154	0.051600924	172	185	0.551146575	0.047375936	0.992826384	1.199823434	0.103135464	0.785532576	0.085958868	0.654706812	NO
131	3228	191	1182	A	SINGLE.SITE	CIA2_G626A	1	2154	2P16H09	CIA2	B	YES	x	B10	10	B	3	2	1	3	17	20279	16232	5756	4384	-0.481760994	58	5.308827344	5.912170489	0.120461208	5.261388966	0.192017128	0.886921857	0.020875531	0.021095417	0.556309452	0.055920648	0.055862467	0.88488237	0.019657771	0.019818117	5.91253123	0.120827373	0.829476943	0.050489772	0.051730837	-0.186959966	0.060973416	0.061605629	-0.159468416	0.156905241	5.71453936	0.015069192	0.892348259	0.15520363	0.060927681	172	185	0.375008135	0.056702693	1.002928269	0.816377292	0.123439431	0.940177999	0.1512039	1.151646436	NO
CTRL	1617	191	1182	A	WT	WT	1	NAN	NAN	NAN	NAN	NAN	x	B11	11	B	3	2	1	3	17	20322	16321	4496	4099	0.127999499	57	5.308162954	5.887106761	0.073061264	5.357671905	0.143682176	0.908760721	0.017881949	0.017573483	0.454066699	0.077235566	0.077082535	0.908820354	0.016856438	0.016655748	5.887466665	0.073721056	0.897348747	0.052286308	0.052015952	-0.108310699	0.058261858	0.057565418	0.027726701	0.130835829	5.689474794	0.202264309	0.973162912	0.129134218	0.061129651	172	185	0.455822789	0.056904663	0.998529321	0.99230747	0.123879111	0.943526831	0.124839442	0.950841205	NO
170	629	170	629	A	WT	WT	1	NAN	NAN	NAN	NAN	NAN	a	C01	1	C	3	2	1	3	17	19462	16256	5603	4987	0.230689261	56	5.270133146	5.861331255	0.080183671	5.211040406	0.179238614	0.887535439	0.022821367	0.022825509	0.330664213	0.095007636	0.094723314	0.887242536	0.021231305	0.021362769	5.861467376	0.080726421	0.835618458	0.056197864	0.056002216	-0.17958316	0.06705	0.066509197	-0.141011909	0.166754514	5.661555224	0.028166415	0.897523601	0.162481612	0.064625668	170	171	0.381384275	0.060529762	1.003238686	1.015630345	0.161191393	1.027517667	0.158710691	1.011704379	NO
115	3198	191	1182	A	SINGLE.SITE	MOD5_G765A	2	2182	2P19F12	MOD5	C	YES	x	C02	2	C	3	2	1	3	17	22147	17788	5641	4840	-0.178017596	56	5.292481344	5.872368122	0.089251386	5.39305725	0.167335816	0.917786914	0.019529514	0.019155196	0.506497161	0.070038142	0.069923958	0.917930063	0.017836317	0.018017148	5.872864571	0.0900107	0.926703761	0.059251076	0.059640565	-0.076121333	0.064131011	0.064222792	0.09896466	0.139699108	5.672952419	0.268142984	1.005398778	0.135426206	0.068473738	172	185	0.488058655	0.06424875	0.995629567	1.062483625	0.139866887	1.065297925	0.131641451	1.002648793	NO
6	123	190	1180	A	EMS.MUTANT	Y123	1	123	Y123	NAN	NAN	NAN	a	C03	3	C	3	2	1	3	17	20843	17479	6222	5392	0.345072864	56	5.254705637	5.843506539	0.07833543	5.276558303	0.163617806	0.902266637	0.020068244	0.0210151	0.262550568	0.10947469	0.109040468	0.901896917	0.018479358	0.019285043	5.84393997	0.07917872	0.876396291	0.054522458	0.05631116	-0.131936903	0.062208448	0.064027942	-0.026414598	0.149519514	5.644027818	0.142763726	0.945818067	0.145246611	0.064785202	170	171	0.429678741	0.060689295	1.000132796	1.144239015	0.161616233	1.030225816	0.141243421	0.900358931	NO
CTRL	1617	191	1182	A	WT	WT	1	NAN	NAN	NAN	NAN	NAN	x	C04	4	C	3	2	1	3	17	19894	15733	5413	4044	-0.628237306	57	5.29783699	5.900092807	0.129772464	5.398780855	0.194296756	0.912411176	0.019265428	0.019196061	0.581717579	0.05604888	0.055990299	0.91075912	0.017450668	0.017683083	5.900397981	0.129880658	0.903422242	0.05528386	0.056247268	-0.101565236	0.061163435	0.061671169	0.042887861	0.139350062	5.700485829	0.212066185	0.977825747	0.135077159	0.064572768	172	185	0.460485623	0.060347779	1.000461809	1.002458269	0.131374634	1.000616574	0.131052472	0.998162822	NO
128	3225	191	1182	A	SINGLE.SITE	ADE5_G1715A	2	1581	1P06E01	ADE5	NAN	YES	x	C06	6	C	3	2	1	3	17	15211	10269	3429	1999	-1.153462163	59	5.381461668	5.951264644	0.13684805	5.637570777	0.19215147	0.944140104	0.015946384	0.016292714	0.603709584	0.057203055	0.057140784	0.944953615	0.012979903	0.013359455	5.951346761	0.136902549	1.027163897	0.053597395	0.054428452	0.026801507	0.052242758	0.053149679	0.310288919	0.103205041	5.751434609	0.479467243	1.124376863	0.098932139	0.061792488	172	185	0.60703674	0.0575675	1.009403557	1.321494025	0.12532208	0.954517223	0.094833634	0.72230158	NO
167	R484	191	1182	A	RAP1.MUTANT	PLATE	1	NAN	NAN	RAP1	NAN	NAN	x	C07	7	C	3	2	1	3	17	21852	17803	8239	7765	0.151596482	55	5.271343608	5.843134942	0.103831488	5.452946584	0.151597229	0.932279409	0.011981393	0.012215825	0.511025724	0.07209378	0.071969265	0.932371028	0.009914844	0.009931858	5.843246525	0.103795437	0.977742985	0.037256183	0.037145995	-0.02250844	0.037979523	0.037911679	0.211893044	0.077717658	5.643334373	0.381071368	1.065846129	0.073444755	0.041574429	182	185	0.548506006	0.03734944	0.990474956	1.199439306	0.081673466	0.633912348	0.068093038	0.528507233	NO
CTRL	1617	191	1182	A	WT	WT	1	NAN	NAN	NAN	NAN	NAN	x	C08	8	C	3	2	1	3	17	20506	16415	5464	4760	-0.08610025	57	5.296830444	5.884958123	0.093765847	5.369965935	0.156062542	0.910611558	0.018008335	0.018086764	0.625272486	0.048486169	0.048448227	0.910229884	0.017535368	0.017456209	5.884944964	0.093955763	0.901755176	0.055058571	0.055456007	-0.103412219	0.061185545	0.060880688	0.038749227	0.137959532	5.685032812	0.207927551	0.975851388	0.133686629	0.063644088	172	185	0.458511264	0.0594191	0.997749732	0.998160171	0.129352937	0.985218295	0.129591363	0.98703427	NO
23	1595	191	1182	A	EMS.MUTANT	1P11B11	1	1595	1P11B11	NAN	NAN	NAN	x	C10	10	C	3	2	1	3	17	23257	19185	8110	7770	0.128068354	55	5.281706804	5.855677217	0.095357007	5.471111205	0.150638189	0.93409318	0.013404767	0.013195055	0.356603501	0.098620477	0.098302602	0.935204905	0.009506843	0.009981819	5.855815698	0.095699786	0.988453278	0.036286456	0.037811077	-0.011613903	0.036753158	0.038346576	0.234053975	0.077375308	5.655903546	0.403232298	1.078530665	0.073102406	0.042307907	172	185	0.561190541	0.038082918	0.992637411	1.221688736	0.082904948	0.631446591	0.067860941	0.516863726	NO
18	1572	191	1182	A	EMS.MUTANT	1P03E05	1	1572	1P03E05	NAN	NAN	NAN	x	C11	11	C	3	2	1	3	17	15149	11451	2536	2346	-0.928248217	60	5.375571552	5.965111821	0.070607589	5.664144884	0.092336883	0.949514929	0.007870551	0.00792	0.687799204	0.043874404	0.043846284	0.949423514	0.007044855	0.0073967	5.965073636	0.070723773	1.045924298	0.030017276	0.031566585	0.04490099	0.028705901	0.030159377	0.345243543	0.057799213	5.765161484	0.514421866	1.146595394	0.053526311	0.034621525	172	185	0.62925527	0.030396537	1.011812687	1.369862852	0.066172011	0.503999966	0.048305574	0.367920019	NO
CTRL	1617	191	1182	A	WT	WT	1	NAN	NAN	NAN	NAN	NAN	x	C12	12	C	3	2	1	3	17	20731	16736	6024	4944	-0.193712056	57	5.298702468	5.900902156	0.112046122	5.398668135	0.175090034	0.912300918	0.018944555	0.018974782	0.595180686	0.053740974	0.053689328	0.911116462	0.018085036	0.017942734	5.901038793	0.111975506	0.904551757	0.057064462	0.05688989	-0.100315755	0.063317225	0.062493334	0.045682273	0.140548827	5.701126642	0.214860597	0.979163466	0.136275924	0.065328128	172	185	0.461823342	0.06110314	1.000574274	1.005370428	0.133019023	1.013141089	0.13230847	1.007729152	NO
38	2142	191	1182	A	EMS.MUTANT	2P15E04	1	2142	2P15E04	NAN	NAN	NAN	x	D01	1	D	3	2	1	3	17	20031	15590	4413	4177	0.121208857	58	5.339968117	5.92467669	0.066931998	5.45757309	0.12028715	0.920658665	0.015364992	0.015985685	0.611374611	0.052202689	0.052155347	0.920723572	0.014782576	0.015600682	5.924692863	0.066593671	0.936132578	0.050531875	0.052378877	-0.065998169	0.053746787	0.056101371	0.120809901	0.120038567	5.72912975	0.29147866	1.017336429	0.118696906	0.061432089	172	185	0.499996305	0.0572071	1.00548895	1.0884714	0.124537505	0.948541493	0.114415046	0.871443653	NO
CTRL	1617	191	1182	A	WT	WT	1	NAN	NAN	NAN	NAN	NAN	x	D02	2	D	3	2	1	3	17	18530	14871	5029	4147	-0.466609383	57	5.315914066	5.915316979	0.126319525	5.410647347	0.189235007	0.912079212	0.019204362	0.018462351	0.611623638	0.050792811	0.050749198	0.910738633	0.017369159	0.017325456	5.915811602	0.126581039	0.903357578	0.054825813	0.055019287	-0.101636815	0.060888469	0.060408996	0.042727646	0.136329632	5.720248489	0.213396405	0.978462073	0.134987971	0.064616028	172	185	0.46112195	0.06039104	1.003930248	1.003843526	0.13146881	1.001333871	0.130965441	0.997499954	NO
174	2003	191	1182	A	CHR2SNP.69593(T)	POLYMORPHISM	1	NAN	NAN	NAN	NAN	NAN	x	D03	3	D	3	2	1	3	17	19464	15282	4998	4230	-0.325633562	58	5.313292625	5.912505557	0.114637347	5.398105007	0.172982508	0.910806022	0.018261817	0.017640923	0.655941777	0.043105963	0.043079294	0.909892387	0.016917092	0.016933409	5.913012725	0.114849795	0.900695679	0.052449664	0.053659223	-0.104587839	0.05836792	0.058985546	0.036110006	0.133842395	5.717449612	0.206778765	0.9753048	0.132500733	0.063007096	172	185	0.457964677	0.058782108	1.003439032	0.996970272	0.127966232	0.974656438	0.128355113	0.977618356	NO
89	3068	191	1182	A	SINGLE.SITE	ADE5_G1715A	1	1581	1P06E01	ADE5	NAN	YES	x	D04	4	D	3	2	1	3	17	14100	9333	3199	1977	-1.163879996	60	5.396510722	5.955419299	0.134262091	5.640125508	0.205973785	0.945722642	0.015963745	0.015982593	0.598943842	0.058229116	0.058163438	0.946242039	0.012061646	0.012813597	5.955425217	0.13483838	1.032504381	0.050760207	0.052729312	0.031987289	0.048857489	0.051226083	0.320364401	0.098980878	5.759862104	0.49103316	1.131642812	0.097639216	0.061694377	172	185	0.614302688	0.057469389	1.010882622	1.337311696	0.125108496	0.952890458	0.093552234	0.712541781	NO
36	2100	191	1182	A	EMS.MUTANT	2P11C10	1	2100	2P11C10	NAN	NAN	NAN	x	D05	5	D	3	2	1	3	17	19573	15673	4901	3975	-0.515685241	56	5.284404823	5.876789209	0.101277669	5.267199898	0.168738027	0.895091135	0.018712952	0.019039707	0.595839311	0.050920973	0.050877029	0.894369745	0.018161682	0.018227086	5.876750877	0.101709147	0.854867668	0.05010698	0.051261317	-0.156808597	0.058666295	0.059280086	-0.085277112	0.144363311	5.681187764	0.085391648	0.920948297	0.143021649	0.060235873	172	185	0.403608174	0.056010885	0.997074909	0.8786384	0.121933393	0.928707245	0.138775398	1.056984586	NO
CTRL	1617	191	1182	A	WT	WT	1	NAN	NAN	NAN	NAN	NAN	x	D06	6	D	3	2	1	3	17	20556	16168	5204	4376	-0.32666414	57	5.299087786	5.889488549	0.102149232	5.371475157	0.16990224	0.909951469	0.018309262	0.01814686	0.581362665	0.055792418	0.055734635	0.909368934	0.01746602	0.017180064	5.889507161	0.102959478	0.899057931	0.054630836	0.054078286	-0.106407807	0.060591211	0.05961002	0.032016599	0.135440945	5.693944048	0.202685358	0.973362271	0.134099283	0.063506752	172	185	0.456022148	0.059281763	0.999313696	0.992741466	0.129053961	0.982941138	0.129997552	0.990128015	NO
190	1180	190	1180	A	GFP.MATA	GFP.MATA	1	NAN	NAN	NAN	NAN	NAN	a	D07	7	D	3	2	1	3	17	20634	16409	5567	4509	-0.458766905	57	5.302621491	5.900413014	0.098440999	5.146720134	0.175113273	0.870372634	0.021950233	0.021742769	0.570674074	0.050792811	0.050749198	0.869040444	0.021683685	0.021109806	5.900388396	0.09855804	0.791061697	0.049765314	0.047561628	-0.234379315	0.06277458	0.059944927	-0.283352333	0.163285177	5.704825283	-0.112683574	0.845268176	0.161943515	0.055949217	172	185	0.327928052	0.051724229	1.001223403	0.713885887	0.11260152	0.85763091	0.157730418	1.201355743	NO
153	3271	191	1182	A	OFF.TARGET	TUP1_T2098del	1	94	Y94	TUP1	NAN	YES	x	D08	8	D	3	2	1	3	17	19974	15666	5402	3799	-0.732625252	57	5.309366957	5.907389861	0.120563471	5.406446499	0.181553365	0.912322717	0.018530651	0.019331736	0.611512678	0.050920973	0.050877029	0.911269437	0.017872087	0.018132563	5.907307528	0.121183328	0.905036258	0.056060746	0.057320277	-0.099780272	0.062148037	0.062994983	0.046878538	0.141442811	5.711744415	0.217547297	0.980453151	0.140101149	0.067342556	172	185	0.463113028	0.063117568	1.002437743	1.00817802	0.137404349	1.04654198	0.136289769	1.038052763	NO
[truncated: 732,175 more chars]
